# Supplementary material for: Genome-wide identification and drought-responsive root expression profiling of the VQ gene family in proso millet ( Panicum miliaceum L.)
Source: PeerJ journal article supplement (doi:10.7717/peerj.20792), 2026-02-10
Supplement: Raw_data.xlsx [file Raw_data.xlsx]

## Sheet: Sheet1
Gene name		NLD			LM4			YS1
PmVQ6	CK	0.7057	0.9085	1.566	1.0709	0.8474	1.102	0.8403	0.6572	1.661
	PEG	30.507		40.781	50.129	33.7858	45.2319		8.1531	13.453
		NLD			LM4			YS1
PmVQ12	CK	0.8782	0.9469	1.2026	1.8808		2.9566	0.2863	3.7397	2.5438
	PEG	40.88	33.459	36.173	16.32	35.575	27.767	65.525	75.813	72.348
		NLD			LM4			YS1
PmVQ24	CK	1.3883	0.62412	1.2412	1.3883		2.2412	4.2025	3.2025
	PEG		22.692	16.893	5.3554	4.7819	7.1581	2.1069	3.1165	2.1039
		NLD			LM4			YS1
PmVQ25	CK	1.11037	1.17884	0.896747	0.996846	1.17521	1.06307	0.712297	0.608081	0.680924
	PEG	0.489077	0.412361	0.579539	0.447058	0.35022	0.434066	0.165609	0.185016	0.102431
		NLD			LM4			YS1
PmVQ29	CK	1.29008		0.941384	7.6432	9.65582		4.16297	6.85182
	PEG	4.39154	4.28334	3.78653	12.6689	15.6441	12.1338	11.7576	12.1475	9.97511
		NLD			LM4			YS1
PmVQ33	CK	0.947683	0.985233	1.07102	1.06432	1.70001	2.36769	0.917983	0.605995	1.38616
	PEG	1.54098	2.46231	2.47453	8.04556	9.65709	10.4029	5.22275	4.69578	4.78247
		NLD			LM4			YS1
PmVQ34	CK	1.2371	0.695705	1.16191	0.877954	1.01261	1.0767	1.05465	1.97984	0.434782
	PEG	1.66949	1.86308	0.233089	1.0445	1.14277	2.07226	7.69039	5.85395	4.50713
		NLD			LM4			YS1
PmVQ39	CK	1.0122	1.14595	0.862117	2.88447	3.9479	1.08827	0.170406	1.02011	0.994599
	PEG	1.24116	0.979525		6.61504	3.20955	4.6292	6.88891	5.16262	7.23331
		NLD			LM4			YS1
PmVQ41	CK	1.0524	1.0397	0.73994	0.6783	1.2999	0.8282	1.50843	0.926	1.646
	PEG	0.011	0.0756	0.0018	0.0601	0.0064	0.03149		1.3656	1.4528
		NLD			LM4			YS1
PmVQ48	CK	0.477418	0.991576	0.62221	0.446138	0.468155	0.893792		0.639578	0.644087
	PEG	1.95542	2.24307	1.66901	0.950801	1.018	1.13745	0.770291	0.613583	0.535255
		NLD			LM4			YS1
PmVQ50	CK	0.764371	1.18907	1.10024	0.692495	0.638331	0.563123	0.455454	0.447588	0.786061
	PEG	0.403089	0.65656	0.706884	1.16114	1.03982	1.93484	0.482374	0.204627	0.692048
		NLD			LM4			YS1
PmVQ51	CK	0.698876	1.1781	0.976488	0.874513	0.91517	1.40431	0.950812		0.83641
	PEG	8.10333	5.99116	6.77198	1.24521	1.02758	1.18695	1.39995	1.52013	1.01883
		NLD			LM4			YS1
PmVQ54	CK	1.51489	0.577547	1.43925	2.07626	1.33869	1.80029	2.11214	1.76943	1.92347
	PEG	3.04677	2.73124	4.74092	1.35394	3.13862	2.87477	3.74562	2.82957	2.73137
		NLD			LM4			YS1
PmVQ65	CK	1.40251	0.907107	1.15822	0.600394	1.21832	0.63291	2.46235	1.6503	2.02712
	PEG	10.5776	12.7044	13.025	1.38337	1.71098	3.48056	2.49557	6.29113	5.01438
