# Supplementary material for: Genome-wide identification and drought-responsive root expression profiling of the VQ gene family in proso millet ( Panicum miliaceum L.)
Source: PeerJ journal article supplement (doi:10.7717/peerj.20792), 2026-02-10
Supplement: Table_S7.xlsx [file Table_S7.xlsx]

## Sheet: up-regulated 
#ID	CK_vs_D1_DESeq2_FDR	CK_vs_D1_DESeq2_log2FC	CK_vs_D1_DESeq2_(FDR_0.01_FC_1.5)_regulated	CK_vs_D2_DESeq2_FDR	CK_vs_D2_DESeq2_log2FC	CK_vs_D2_DESeq2_(FDR_0.01_FC_1.5)_regulated	CK_vs_D3_DESeq2_FDR	CK_vs_D3_DESeq2_log2FC	CK_vs_D3_DESeq2_(FDR_0.01_FC_1.5)_regulated	CK_vs_D4_DESeq2_FDR	CK_vs_D4_DESeq2_log2FC	CK_vs_D4_DESeq2_(FDR_0.01_FC_1.5)_regulated	CK_vs_R1_DESeq2_FDR	CK_vs_R1_DESeq2_log2FC	CK_vs_R1_DESeq2_(FDR_0.01_FC_1.5)_regulated
Panicum_miliaceum_newGene_10017	0.00693593	-0.774904	down	0.0137243	-0.780167	normal	0.0208587	-0.938216	normal	9.49912e-06	-2.31541	down	6.99735e-12	2.59151	up
Panicum_miliaceum_newGene_10019	2.28869e-09	1.11109	up	1.27026e-21	1.73699	up	9.35682e-35	2.02886	up	2.60983e-14	1.58743	up	0.10821	0.406186	normal
Panicum_miliaceum_newGene_10027	0.000838488	0.860814	up	0.000467562	0.966959	up	0.000564098	1.12682	up	0.94059	-0.0399109	normal	0.820998	0.129244	normal
Panicum_miliaceum_newGene_10047	0.023776	0.724395	normal	0.00394091	0.745105	up	0.497275	0.233991	normal	0.000169457	-1.58965	down	2.30828e-18	-4.01842	down
Panicum_miliaceum_newGene_10055	--	--	--	--	--	--	7.18462e-06	2.74223	up	--	--	--	--	--	--
Panicum_miliaceum_newGene_10085	0.970365	-0.0142681	normal	0.630971	-0.177664	normal	0.0459359	0.484818	normal	0.000277116	0.84732	up	0.45848	0.344014	normal
Panicum_miliaceum_newGene_10097	0.0584258	0.349962	normal	0.00414564	0.474437	normal	1.45579e-06	0.842212	up	6.75756e-05	1.02553	up	0.17732	0.352571	normal
Panicum_miliaceum_newGene_10102	--	--	--	2.75205e-06	3.19012	up	--	--	--	--	--	--	--	--	--
Panicum_miliaceum_newGene_10105	0.00731857	0.743399	up	4.54521e-07	0.953027	up	0.000712371	0.975433	up	0.5478	0.235026	normal	0.174583	0.656938	normal
Panicum_miliaceum_newGene_10120	0.00820873	0.392828	normal	5.2454e-05	0.670779	up	2.01239e-09	1.05553	up	0.00065412	0.838841	up	0.405409	0.302315	normal
Panicum_miliaceum_newGene_1013	0.0994641	0.451415	normal	2.88464e-05	0.858385	up	3.05372e-09	1.29899	up	0.0106875	0.839697	normal	0.0937469	-0.578136	normal
Panicum_miliaceum_newGene_10133	0.844432	0.097316	normal	0.362017	-0.619697	normal	0.662026	0.180021	normal	0.000121277	1.14961	up	0.939347	-0.0629454	normal
Panicum_miliaceum_newGene_10159	0.9462	-0.11311	normal	0.252298	-0.864709	normal	0.255436	-0.711204	normal	6.57185e-05	2.20865	up	8.46699e-06	2.72432	up
Panicum_miliaceum_newGene_10160	2.79178e-09	1.32583	up	8.47432e-09	1.78882	up	3.62918e-16	1.8268	up	0.0807579	0.59067	normal	0.592353	0.243777	normal
Panicum_miliaceum_newGene_10182	0.231951	1.00656	normal	0.196063	1.18238	normal	0.878551	-0.378662	normal	0.000128184	2.87362	up	--	--	--
Panicum_miliaceum_newGene_1020	0.973099	-0.0148561	normal	0.0212108	0.497665	normal	0.000199591	0.805093	up	0.00011271	1.10801	up	0.235177	0.477984	normal
Panicum_miliaceum_newGene_10209	0.00238229	1.30297	up	4.25625e-08	1.98895	up	2.11959e-11	2.07422	up	0.00033185	1.43398	up	1.59662e-07	2.58129	up
Panicum_miliaceum_newGene_1022	0.000225787	1.13332	up	4.09091e-10	1.49165	up	5.18834e-22	1.99769	up	0.00290169	1.19107	up	0.139901	0.667778	normal
Panicum_miliaceum_newGene_10225	0.000185238	1.82864	up	--	--	--	--	--	--	--	--	--	--	--	--
Panicum_miliaceum_newGene_10228	--	--	--	--	--	--	3.82006e-05	1.93583	up	2.69424e-08	2.67069	up	0.00194463	1.87887	up
Panicum_miliaceum_newGene_10229	1.99771e-12	1.03304	up	1.19666e-10	1.33954	up	1.03606e-16	1.4171	up	0.000471679	0.836691	up	0.784269	-0.178953	normal
Panicum_miliaceum_newGene_10236	2.74989e-06	2.61431	up	--	--	--	--	--	--	--	--	--	--	--	--
Panicum_miliaceum_newGene_10244	0.0549588	0.514432	normal	0.113766	0.352415	normal	0.0654838	0.437755	normal	0.000250634	0.746361	up	1.12086e-08	1.55924	up
Panicum_miliaceum_newGene_10250	1.4285e-08	1.00696	up	1.42194e-12	1.54405	up	1.09635e-33	1.77362	up	1.83831e-12	1.83881	up	0.0888299	-0.541633	normal
Panicum_miliaceum_newGene_10255	0.0771439	0.390675	normal	0.000218814	1.09008	up	4.17453e-17	1.64868	up	1.87263e-05	1.20585	up	0.823947	0.115329	normal
Panicum_miliaceum_newGene_10257	--	--	--	--	--	--	0.109018	1.54059	normal	1.35405e-06	3.35817	up	--	--	--
Panicum_miliaceum_newGene_10295	0.00339285	0.445498	normal	0.00698293	0.427378	normal	4.03435e-05	0.662304	up	0.000405134	0.595364	up	0.202613	0.293943	normal
Panicum_miliaceum_newGene_10324	0.00517398	1.23208	up	0.0168211	1.14801	normal	2.09929e-05	1.4295	up	0.434622	0.364153	normal	0.0292218	1.94066	normal
Panicum_miliaceum_newGene_10338	2.33488e-37	2.90509	up	6.9406e-32	2.79894	up	3.92112e-23	2.5407	up	0.212216	0.551614	normal	0.175421	0.682972	normal
Panicum_miliaceum_newGene_10341	0.00595889	1.28417	up	3.67709e-06	1.79568	up	5.03417e-07	1.6695	up	0.21778	0.781604	normal	0.596599	-0.531185	normal
Panicum_miliaceum_newGene_10347	0.0464968	0.57268	normal	7.93945e-05	0.806667	up	1.98929e-11	1.32002	up	0.000261789	1.35043	up	0.251261	0.632769	normal
Panicum_miliaceum_newGene_10353	0.829269	0.0417622	normal	0.00167431	0.437057	normal	1.63483e-05	0.598237	up	2.3448e-05	0.707585	up	0.336224	-0.163818	normal
Panicum_miliaceum_newGene_10371	0.839251	-0.254341	normal	0.53478	0.38979	normal	0.227024	0.975191	normal	0.0213524	1.24406	normal	0.000866984	1.65347	up
Panicum_miliaceum_newGene_10380	4.56287e-27	3.81928	up	2.75847e-47	4.95457	up	8.19773e-70	5.54237	up	6.54983e-36	4.85863	up	4.80051e-05	2.13832	up
Panicum_miliaceum_newGene_10384	0.682864	-0.174988	normal	0.178151	-0.675295	normal	0.73507	0.120242	normal	0.17587	-0.565455	normal	0.0043082	1.10501	up
Panicum_miliaceum_newGene_10387	1.16743e-08	0.831013	up	5.34244e-08	1.08022	up	9.69391e-25	1.40554	up	6.43357e-06	1.04074	up	0.257358	0.429656	normal
Panicum_miliaceum_newGene_10401	8.72302e-06	0.791745	up	2.60248e-05	0.725801	up	0.190591	0.385251	normal	0.946799	-0.0175604	normal	3.20146e-06	1.17344	up
Panicum_miliaceum_newGene_10408	0.000307015	0.83296	up	2.39824e-05	1.12764	up	0.000536049	0.84047	up	0.00020011	-1.39674	down	0.763477	-0.321643	normal
Panicum_miliaceum_newGene_10428	0.141001	0.499075	normal	0.365189	0.36895	normal	0.00172334	0.827069	up	0.00253208	0.962992	up	0.232892	0.49611	normal
Panicum_miliaceum_newGene_10436	--	--	--	--	--	--	--	--	--	0.119386	1.18445	normal	0.00040677	2.84172	up
Panicum_miliaceum_newGene_10437	0.000176617	1.62229	up	1.05427e-11	2.36583	up	4.61806e-17	2.68836	up	2.41086e-12	2.41985	up	0.875954	0.138249	normal
Panicum_miliaceum_newGene_10450	0.123172	0.869918	normal	0.00199261	1.52007	up	1.70101e-14	2.91275	up	1.50657e-12	3.25884	up	0.86713	0.160498	normal
Panicum_miliaceum_newGene_10460	0.0035479	-0.896938	down	0.668248	-0.156489	normal	0.000319158	1.1522	up	5.77208e-28	3.82271	up	1.03571e-06	1.70602	up
Panicum_miliaceum_newGene_10461	0.000502418	0.58583	up	1.37521e-08	0.86493	up	2.19621e-15	1.1379	up	6.78158e-08	0.986246	up	0.149067	0.317116	normal
Panicum_miliaceum_newGene_10471	0.894072	-0.0715701	normal	0.0499968	-0.889962	normal	4.95984e-06	-1.95559	down	2.64936e-14	-2.63296	down	6.62058e-06	1.44809	up
Panicum_miliaceum_newGene_10476	0.624667	0.188628	normal	0.0634612	0.418607	normal	1.52872e-05	0.901321	up	1.80411e-06	1.43072	up	0.634167	-0.220842	normal
Panicum_miliaceum_newGene_10507	0.108955	0.306555	normal	0.0053204	0.432075	normal	0.000410373	0.6583	up	0.116454	0.401614	normal	0.884197	-0.0596769	normal
Panicum_miliaceum_newGene_10509	0.821661	-0.0728421	normal	0.800122	-0.0621469	normal	0.0078734	0.554474	normal	0.00316691	0.825201	up	0.000862314	1.09892	up
Panicum_miliaceum_newGene_10513	0.295052	0.835793	normal	0.34164	0.647392	normal	0.00728513	1.26071	up	2.21994e-09	3.04493	up	0.0935627	1.48468	normal
Panicum_miliaceum_newGene_10515	0.823016	0.432012	normal	0.579482	0.619153	normal	--	--	--	--	--	--	0.000325692	3.19914	up
Panicum_miliaceum_newGene_10518	0.478712	-0.326146	normal	0.00435566	0.919298	up	0.0194193	1.29714	normal	0.0114283	1.33264	normal	0.0093891	-1.26581	down
Panicum_miliaceum_newGene_10525	0.768561	0.0963154	normal	0.000293471	0.740106	up	2.98519e-12	1.32574	up	1.14664e-08	1.3525	up	0.815979	0.0858094	normal
Panicum_miliaceum_newGene_10557	0.91525	-0.0743582	normal	0.304122	-0.551501	normal	0.259485	-0.625486	normal	0.519608	-0.357435	normal	1.26939e-11	2.74459	up
Panicum_miliaceum_newGene_10584	0.208108	0.360887	normal	0.21071	0.397502	normal	0.697701	-0.12484	normal	1.45037e-06	1.0195	up	0.932988	-0.0350707	normal
Panicum_miliaceum_newGene_10611	0.0161527	-0.632286	normal	0.1909	-0.422964	normal	0.151336	-0.344648	normal	0.40577	-0.207822	normal	0.00026598	0.93902	up
Panicum_miliaceum_newGene_1062	--	--	--	--	--	--	6.26331e-10	3.84609	up	--	--	--	--	--	--
Panicum_miliaceum_newGene_10625	0.00837148	0.395332	normal	1.36622e-05	0.606012	up	2.538e-10	1.04016	up	4.43555e-05	1.06914	up	0.93345	0.0389328	normal
Panicum_miliaceum_newGene_10637	0.312011	0.538494	normal	0.103962	0.838786	normal	0.0150578	1.00131	normal	1.1475e-07	1.99542	up	0.335262	0.586386	normal
Panicum_miliaceum_newGene_10659	0.869474	0.165343	normal	0.489116	0.469736	normal	0.596974	0.330262	normal	0.302932	0.63779	normal	0.00100595	2.47078	up
Panicum_miliaceum_newGene_10660	0.937403	-0.0371579	normal	0.0334157	0.816771	normal	0.0167762	0.829706	normal	1.79545e-08	1.46725	up	2.6042e-07	2.35357	up
Panicum_miliaceum_newGene_10702	0.834464	-0.140659	normal	0.879701	0.110148	normal	0.176427	0.445055	normal	0.00176321	1.22032	up	0.656751	-0.291967	normal
Panicum_miliaceum_newGene_10703	0.00600332	1.07855	up	6.92706e-06	1.8665	up	4.28263e-06	1.66444	up	0.536497	0.333551	normal	0.424812	-1.4673	normal
Panicum_miliaceum_newGene_10704	0.00355893	1.02761	up	0.112828	0.493103	normal	0.821051	0.0962757	normal	0.373311	0.295279	normal	0.412649	-0.357061	normal
Panicum_miliaceum_newGene_10730	3.19458e-16	1.60867	up	4.16877e-41	2.68365	up	1.31638e-28	2.66062	up	0.000487954	1.3775	up	0.580398	0.394818	normal
Panicum_miliaceum_newGene_10744	1.32387e-07	2.86811	up	5.06612e-11	3.32225	up	1.62399e-16	3.60114	up	2.89402e-06	2.9012	up	--	--	--
Panicum_miliaceum_newGene_10749	--	--	--	--	--	--	--	--	--	--	--	--	3.54386e-06	2.80981	up
Panicum_miliaceum_newGene_1075	--	--	--	1.16044e-09	3.00383	up	2.9084e-18	3.59317	up	4.59348e-07	2.93046	up	--	--	--
Panicum_miliaceum_newGene_10761	0.341507	0.273023	normal	0.955878	0.0189967	normal	0.00104472	0.651379	up	0.0129729	0.764237	normal	0.86811	-0.0661747	normal
Panicum_miliaceum_newGene_1077	2.52441e-06	2.25213	up	4.33487e-18	3.39439	up	9.57977e-32	4.09086	up	3.22263e-10	3.24983	up	--	--	--
Panicum_miliaceum_newGene_10773	0.496243	0.406684	normal	0.00567812	1.23606	up	0.118618	0.752325	normal	0.943559	0.0444733	normal	0.996236	0.00456048	normal
Panicum_miliaceum_newGene_10775	0.285828	0.557463	normal	0.00198703	1.29227	up	0.0006419	1.42334	up	9.5462e-06	1.6576	up	0.950525	-0.0666028	normal
Panicum_miliaceum_newGene_10782	0.501665	0.893074	normal	0.347025	1.55922	normal	0.544746	0.348065	normal	0.00253257	1.73456	up	0.932014	-0.348715	normal
Panicum_miliaceum_newGene_10796	0.0336821	0.586169	normal	2.77979e-06	0.99005	up	3.54967e-10	1.21219	up	0.068852	0.603678	normal	0.865406	0.0568568	normal
Panicum_miliaceum_newGene_10797	0.158195	0.601941	normal	0.746815	0.177683	normal	6.76412e-05	1.4484	up	1.28376e-07	2.10792	up	0.689488	-0.275111	normal
Panicum_miliaceum_newGene_10843	0.628871	0.169063	normal	0.165423	0.284464	normal	0.00260773	0.774894	up	3.85162e-11	1.37818	up	0.0131055	0.54145	normal
Panicum_miliaceum_newGene_1086	0.00301946	-0.707375	down	0.00128891	-0.701675	down	0.000418508	-1.08317	down	0.381777	-0.210302	normal	0.00226528	0.795184	up
Panicum_miliaceum_newGene_10868	0.0067134	1.29869	up	--	--	--	--	--	--	0.120816	0.858495	normal	--	--	--
Panicum_miliaceum_newGene_10877	1.56736e-11	1.48641	up	9.18895e-29	2.15405	up	2.17176e-42	2.47353	up	2.27698e-11	1.55255	up	0.00436522	1.11083	up
Panicum_miliaceum_newGene_10879	0.555512	0.196257	normal	0.0234403	0.531475	normal	0.000754634	0.660176	up	0.484047	0.263697	normal	4.75536e-07	-2.33617	down
Panicum_miliaceum_newGene_10884	0.21412	0.443179	normal	0.00149201	0.867364	up	1.22302e-06	1.44336	up	5.71836e-13	1.79512	up	0.149233	0.562579	normal
Panicum_miliaceum_newGene_10889	0.453199	0.194873	normal	0.131057	0.372196	normal	0.00157137	0.846197	up	0.000425073	0.964011	up	0.930532	-0.0560636	normal
Panicum_miliaceum_newGene_10901	1.33562e-22	1.39752	up	2.54284e-20	1.75865	up	6.32573e-28	1.81197	up	4.73713e-08	1.26737	up	0.0255656	-0.722039	normal
Panicum_miliaceum_newGene_10903	--	--	--	--	--	--	--	--	--	1.78069e-05	3.45911	up	--	--	--
Panicum_miliaceum_newGene_10921	0.0353052	1.25839	normal	0.0310593	1.2951	normal	0.0301537	1.17457	normal	0.00036537	1.78852	up	1.13829e-05	2.57391	up
Panicum_miliaceum_newGene_1093	2.9218e-06	2.39713	up	2.97965e-13	3.39195	up	6.04113e-27	3.92801	up	4.29923e-12	3.18773	up	0.00284247	1.90263	up
Panicum_miliaceum_newGene_10931	6.55296e-06	1.38272	up	1.12898e-14	2.27895	up	4.09106e-15	2.30753	up	0.0259586	0.92049	normal	0.139991	0.830704	normal
Panicum_miliaceum_newGene_10932	--	--	--	--	--	--	--	--	--	4.81106e-05	1.90075	up	--	--	--
Panicum_miliaceum_newGene_10951	0.000311674	0.81034	up	0.00448145	0.821982	up	7.03376e-07	1.12437	up	5.46138e-08	1.25167	up	0.133428	-0.603622	normal
Panicum_miliaceum_newGene_10952	0.361009	0.566352	normal	--	--	--	0.000159606	1.58045	up	0.000425601	1.62195	up	0.198828	0.955256	normal
Panicum_miliaceum_newGene_11026	--	--	--	--	--	--	2.98844e-09	4.48221	up	--	--	--	--	--	--
Panicum_miliaceum_newGene_11056	0.00266643	1.53512	up	0.248267	0.822881	normal	0.000594817	1.57662	up	1.48566e-08	2.46335	up	1.02385e-09	3.77051	up
Panicum_miliaceum_newGene_11074	--	--	--	--	--	--	0.00165876	1.5196	up	--	--	--	--	--	--
Panicum_miliaceum_newGene_1108	--	--	--	--	--	--	8.44339e-10	3.36411	up	5.19015e-07	3.18847	up	--	--	--
Panicum_miliaceum_newGene_1109	--	--	--	1.58401e-08	2.74608	up	4.61971e-19	3.66855	up	2.09067e-07	3.10576	up	--	--	--
Panicum_miliaceum_newGene_1111	--	--	--	1.60924e-10	3.38213	up	1.55461e-14	3.65464	up	--	--	--	--	--	--
Panicum_miliaceum_newGene_11129	0.721855	-0.169862	normal	1.22735e-09	-1.41408	down	3.69797e-06	-1.56386	down	0.0248925	-0.630622	normal	3.91809e-07	2.05254	up
Panicum_miliaceum_newGene_1113	0.156323	-0.343605	normal	0.62797	0.115398	normal	0.00756356	0.619841	up	0.000945723	1.23565	up	0.791439	0.0927018	normal
Panicum_miliaceum_newGene_11140	0.326754	-0.745594	normal	0.443746	0.416415	normal	0.0796311	0.905354	normal	0.975516	-0.0230621	normal	0.000116788	1.77793	up
Panicum_miliaceum_newGene_11169	0.699339	0.0924891	normal	0.316412	0.242185	normal	0.000557179	0.608462	up	0.00596838	0.492632	normal	0.87946	0.0484855	normal
Panicum_miliaceum_newGene_11177	--	--	--	--	--	--	4.80072e-12	4.6367	up	--	--	--	--	--	--
Panicum_miliaceum_newGene_11191	0.0475508	0.639335	normal	0.00403508	0.779011	up	8.99365e-05	0.960454	up	0.0244856	0.790123	normal	0.998227	-0.00186971	normal
Panicum_miliaceum_newGene_11218	0.0163951	0.473025	normal	9.07436e-05	0.648634	up	2.0797e-07	0.967814	up	0.319446	0.313538	normal	0.0772452	0.614408	normal
Panicum_miliaceum_newGene_11228	0.766776	-0.152372	normal	1.5032e-10	1.71779	up	1.63894e-40	3.37127	up	4.07224e-36	3.57643	up	0.0969414	-0.5884	normal
Panicum_miliaceum_newGene_11244	0.270496	-0.229131	normal	0.291981	0.210032	normal	1.36959e-05	0.746543	up	2.16631e-06	1.29448	up	0.325195	0.280042	normal
Panicum_miliaceum_newGene_11280	--	--	--	--	--	--	--	--	--	--	--	--	0.00777533	2.40181	up
Panicum_miliaceum_newGene_11281	0.664321	-0.17094	normal	0.736648	0.112493	normal	6.55475e-05	0.89826	up	0.0126635	1.11457	normal	0.707364	0.158615	normal
Panicum_miliaceum_newGene_11329	2.90334e-06	1.09441	up	7.57585e-19	1.81192	up	3.23906e-12	1.91849	up	7.62072e-15	2.01158	up	0.000108472	-0.955947	down
Panicum_miliaceum_newGene_11343	0.573244	-0.13973	normal	0.0699122	-0.33239	normal	0.804685	0.0471971	normal	0.016403	0.460589	normal	0.00604772	0.846399	up
Panicum_miliaceum_newGene_11345	4.05131e-08	1.2916	up	7.68084e-13	1.83126	up	5.31745e-23	2.30313	up	2.67005e-14	1.91573	up	0.340598	-0.430388	normal
Panicum_miliaceum_newGene_1135	--	--	--	--	--	--	--	--	--	--	--	--	2.60708e-24	4.29441	up
Panicum_miliaceum_newGene_11365	3.91548e-08	2.55174	up	8.56539e-17	3.40419	up	1.61994e-30	3.98993	up	1.36181e-12	3.28272	up	0.16097	1.02886	normal
Panicum_miliaceum_newGene_11366	--	--	--	1.82112e-08	3.4569	up	3.46169e-21	4.47479	up	3.29819e-07	3.26071	up	0.000143143	3.21097	up
Panicum_miliaceum_newGene_11367	--	--	--	--	--	--	9.47752e-11	4.95404	up	--	--	--	--	--	--
Panicum_miliaceum_newGene_11385	6.51851e-05	2.38024	up	2.17754e-10	3.40079	up	1.61723e-20	4.1643	up	1.52921e-07	3.35033	up	--	--	--
Panicum_miliaceum_newGene_11386	5.13091e-05	2.21935	up	5.9494e-10	3.02863	up	6.96158e-19	3.71514	up	2.25955e-06	2.92986	up	--	--	--
Panicum_miliaceum_newGene_11391	--	--	--	--	--	--	--	--	--	--	--	--	5.47289e-08	8.91433	up
Panicum_miliaceum_newGene_11394	0.907039	-0.033597	normal	0.00047815	0.619092	up	6.65025e-13	1.0887	up	8.13544e-05	1.19194	up	0.228456	0.328775	normal
Panicum_miliaceum_newGene_11409	0.985261	-0.00591021	normal	0.059041	0.409524	normal	2.18372e-07	1.01319	up	2.74827e-05	1.33438	up	0.782799	0.108229	normal
Panicum_miliaceum_newGene_11419	--	--	--	--	--	--	--	--	--	--	--	--	0.00694222	1.33489	up
Panicum_miliaceum_newGene_11421	0.525605	0.268366	normal	0.0677145	0.667767	normal	0.0304413	0.998545	normal	0.156458	0.640776	normal	0.00421934	1.56742	up
Panicum_miliaceum_newGene_11449	0.0797775	0.555321	normal	0.0111452	0.658362	normal	0.00121615	0.882943	up	0.00382111	0.865136	up	0.517368	0.29825	normal
Panicum_miliaceum_newGene_11473	0.000965094	1.15943	up	3.72572e-06	1.64536	up	3.66531e-11	2.06479	up	2.52997e-05	2.05266	up	0.66275	0.272593	normal
Panicum_miliaceum_newGene_11482	0.190476	0.521707	normal	0.107153	0.530437	normal	0.0685076	0.589285	normal	0.000120871	1.09369	up	0.649801	-0.248992	normal
Panicum_miliaceum_newGene_11492	0.0194147	0.791136	normal	0.000634962	1.58103	up	1.47642e-12	2.39528	up	1.29977e-12	2.20038	up	0.0218973	1.20729	normal
Panicum_miliaceum_newGene_11499	1.67846e-06	0.698261	up	0.0118274	0.66159	normal	2.92257e-05	0.639237	up	0.0173294	0.544096	normal	0.00131367	0.853936	up
Panicum_miliaceum_newGene_11511	0.000269687	1.46209	up	0.0314498	1.01278	normal	0.0347126	0.924527	normal	0.0643818	0.977566	normal	0.0494006	1.4936	normal
Panicum_miliaceum_newGene_1155	1.12631e-06	1.10337	up	0.000791922	1.16608	up	1.99741e-08	1.79843	up	5.38114e-05	1.15318	up	0.0569896	-0.708882	normal
Panicum_miliaceum_newGene_11554	0.83251	0.0624904	normal	0.718116	-0.108223	normal	0.850475	-0.0487286	normal	0.506676	-0.185489	normal	0.00150098	0.995705	up
Panicum_miliaceum_newGene_11559	4.93635e-09	1.21219	up	3.32574e-19	1.89787	up	2.38489e-27	2.20852	up	4.75134e-11	1.87619	up	0.659709	0.250596	normal
Panicum_miliaceum_newGene_11582	0.011918	0.651383	normal	0.00059344	0.978951	up	9.82456e-05	1.09656	up	0.00509404	0.748248	up	0.995558	-0.00418071	normal
Panicum_miliaceum_newGene_11588	7.28885e-13	2.62564	up	7.18704e-06	1.99611	up	1.2171e-06	2.29576	up	--	--	--	--	--	--
Panicum_miliaceum_newGene_116	0.192967	-0.71251	normal	0.0264218	-0.968325	normal	0.284146	-0.526667	normal	0.77944	0.130595	normal	5.4227e-05	1.23559	up
Panicum_miliaceum_newGene_11625	0.260797	0.83387	normal	0.0602713	1.07227	normal	0.01018	1.40591	normal	0.000197829	1.744	up	0.777908	0.310364	normal
Panicum_miliaceum_newGene_11626	0.00110859	0.814924	up	0.0355965	0.775557	normal	7.33946e-08	1.27174	up	0.000888164	1.02375	up	0.177252	0.504767	normal
Panicum_miliaceum_newGene_11631	--	--	--	--	--	--	1.76093e-20	4.35644	up	2.26652e-28	4.55654	up	--	--	--
Panicum_miliaceum_newGene_11632	6.62898e-09	2.27586	up	8.07773e-33	3.87173	up	6.66527e-43	4.44907	up	2.33908e-21	3.99459	up	0.000353241	2.23291	up
Panicum_miliaceum_newGene_11643	7.74818e-12	1.57141	up	5.61696e-30	2.39653	up	4.04209e-51	2.8124	up	8.74405e-14	2.21823	up	0.0573054	0.76768	normal
Panicum_miliaceum_newGene_1165	0.251616	0.276181	normal	0.0281854	0.455616	normal	0.00132762	0.852787	up	0.0710928	0.501662	normal	0.953624	0.0351205	normal
Panicum_miliaceum_newGene_11653	0.950101	-0.0299272	normal	0.617034	-0.217149	normal	0.0553965	0.48889	normal	1.80457e-05	1.2529	up	0.10428	0.951192	normal
Panicum_miliaceum_newGene_11675	--	--	--	--	--	--	--	--	--	--	--	--	0.000980045	2.13089	up
Panicum_miliaceum_newGene_11679	0.0468278	0.296612	normal	6.42497e-05	0.654654	up	1.16355e-13	0.966521	up	2.12542e-08	1.0867	up	0.62089	-0.129224	normal
Panicum_miliaceum_newGene_11702	0.0616753	0.387487	normal	0.000214952	0.69261	up	1.23228e-05	0.741649	up	0.0133531	0.495824	normal	0.25415	0.294341	normal
Panicum_miliaceum_newGene_11707	0.026461	0.345726	normal	5.13565e-05	0.652864	up	6.11345e-07	0.931677	up	2.36707e-09	1.01818	up	0.916874	-0.0413966	normal
Panicum_miliaceum_newGene_11724	0.114746	0.272265	normal	0.00090673	0.540108	normal	1.37021e-08	0.958726	up	0.00220686	0.715265	up	0.231765	-0.266699	normal
Panicum_miliaceum_newGene_11726	9.12702e-08	0.809127	up	1.04851e-09	1.15796	up	1.98436e-09	1.10576	up	0.7258	0.136089	normal	2.32539e-46	-2.60583	down
Panicum_miliaceum_newGene_11734	0.133843	-0.453892	normal	0.113397	-0.425438	normal	0.697444	-0.1056	normal	0.00960883	0.693998	up	0.217822	0.511212	normal
Panicum_miliaceum_newGene_11737	0.188758	-0.292918	normal	0.511647	-0.134824	normal	0.776375	-0.0652499	normal	1.88034e-05	0.736621	up	9.31301e-05	1.01724	up
Panicum_miliaceum_newGene_11743	0.000472318	1.60075	up	--	--	--	3.58596e-05	1.83023	up	--	--	--	--	--	--
Panicum_miliaceum_newGene_11758	0.00181177	0.757356	up	2.41607e-06	1.0316	up	9.73951e-07	1.29393	up	0.320756	0.40704	normal	0.315479	-0.442913	normal
Panicum_miliaceum_newGene_11780	--	--	--	--	--	--	6.24453e-05	1.85737	up	--	--	--	--	--	--
Panicum_miliaceum_newGene_118	0.148291	1.04289	normal	0.0180016	1.55417	normal	0.000269521	2.19182	up	0.0315411	1.43695	normal	--	--	--
Panicum_miliaceum_newGene_11862	0.336426	0.39844	normal	0.0399217	0.79668	normal	2.07321e-08	1.64645	up	2.23911e-08	1.9482	up	0.866607	0.180181	normal
Panicum_miliaceum_newGene_11870	5.59865e-06	1.41321	up	5.09278e-07	1.52971	up	1.8681e-06	1.40908	up	0.706847	0.183894	normal	0.4805	0.436331	normal
Panicum_miliaceum_newGene_11872	3.82353e-10	2.22529	up	1.06456e-13	2.67657	up	3.56442e-22	3.24438	up	8.92169e-09	2.34292	up	0.723057	0.436892	normal
Panicum_miliaceum_newGene_11884	8.45881e-17	5.90683	up	1.3116e-24	7.1717	up	1.20713e-23	6.92126	up	1.26219e-15	5.93227	up	--	--	--
Panicum_miliaceum_newGene_11902	0.257362	0.427624	normal	0.00450289	0.896864	up	0.0156367	1.02281	normal	4.99086e-06	1.50268	up	5.08997e-05	1.37601	up
Panicum_miliaceum_newGene_11905	--	--	--	--	--	--	--	--	--	--	--	--	1.06355e-12	5.67957	up
Panicum_miliaceum_newGene_1191	0.453081	0.274785	normal	0.0105319	0.618289	normal	3.79621e-06	1.08729	up	5.24986e-05	1.43917	up	0.0125703	0.948361	normal
Panicum_miliaceum_newGene_11910	0.832771	-0.0721409	normal	0.0347129	0.446639	normal	0.00125639	0.746075	up	1.81257e-05	1.05734	up	0.193712	0.44742	normal
Panicum_miliaceum_newGene_11911	0.847764	0.111785	normal	1.54386e-09	1.81973	up	1.05262e-25	3.17552	up	1.48694e-34	4.08017	up	0.191897	0.6589	normal
Panicum_miliaceum_newGene_11922	8.54685e-16	1.33906	up	4.2859e-18	1.81412	up	2.45756e-51	2.49804	up	2.43658e-55	2.77017	up	0.000478806	1.28119	up
Panicum_miliaceum_newGene_11925	0.287359	-0.423642	normal	0.486653	-0.317969	normal	0.392662	-0.297606	normal	0.408138	0.295175	normal	0.000113642	1.65863	up
Panicum_miliaceum_newGene_11943	0.632009	-0.336985	normal	0.807355	-0.18683	normal	--	--	--	0.771149	0.188254	normal	0.00993357	1.36843	up
Panicum_miliaceum_newGene_11969	8.07998e-09	1.65164	up	5.27764e-18	2.19919	up	4.62988e-18	2.71895	up	7.60246e-07	1.66374	up	0.105856	0.840935	normal
Panicum_miliaceum_newGene_11986	0.102701	0.366266	normal	1.13964e-06	0.717876	up	5.3843e-06	0.796337	up	0.000695528	0.595716	up	0.027235	0.636277	normal
Panicum_miliaceum_newGene_11987	0.0103117	1.09449	normal	0.312244	0.509492	normal	0.00152972	1.3977	up	0.000145857	1.63035	up	0.0647484	-1.27213	normal
Panicum_miliaceum_newGene_11991	0.75209	0.152717	normal	0.00136839	0.960519	up	0.899219	0.0579484	normal	0.327316	0.369249	normal	0.768011	-0.195329	normal
Panicum_miliaceum_newGene_11995	0.00362174	1.54961	up	--	--	--	6.70172e-06	1.85432	up	--	--	--	--	--	--
Panicum_miliaceum_newGene_12020	0.0552874	0.546471	normal	0.913162	0.0426994	normal	0.00449117	0.749412	up	0.0894357	0.660594	normal	0.0289879	0.810692	normal
Panicum_miliaceum_newGene_12021	0.000604576	0.601557	up	1.43882e-05	0.70369	up	4.05358e-12	1.20022	up	3.54813e-05	1.1064	up	0.941252	-0.0361461	normal
Panicum_miliaceum_newGene_12032	0.912223	0.0779494	normal	0.793053	-0.208392	normal	0.144442	0.716309	normal	0.0010695	1.37923	up	0.479573	-0.508177	normal
Panicum_miliaceum_newGene_12040	0.792374	0.135763	normal	0.457039	0.345119	normal	0.0101137	0.927049	normal	1.19575e-05	1.50925	up	0.322425	0.529743	normal
Panicum_miliaceum_newGene_12049	8.50326e-05	1.31571	up	0.186324	0.477783	normal	0.015302	0.73474	normal	0.106129	-0.537832	normal	0.515715	0.687073	normal
Panicum_miliaceum_newGene_12050	0.8598	-0.0853745	normal	0.0970662	0.505345	normal	0.00202762	1.095	up	0.00523514	1.11474	up	0.918656	-0.0579566	normal
Panicum_miliaceum_newGene_12056	0.958196	0.0370358	normal	0.211599	0.395167	normal	0.00546562	0.884459	up	0.80441	0.115193	normal	1.72763e-15	-2.93643	down
Panicum_miliaceum_newGene_12060	0.000743334	1.7698	up	--	--	--	--	--	--	--	--	--	0.0157324	1.86964	normal
Panicum_miliaceum_newGene_12084	0.486537	-0.194203	normal	0.703455	-0.109734	normal	0.631204	0.134123	normal	0.0404582	0.589654	normal	0.00107787	0.826471	up
Panicum_miliaceum_newGene_12095	--	--	--	0.00228479	2.36556	up	0.103954	1.28422	normal	0.00961788	3.4938	up	0.195733	1.43184	normal
Panicum_miliaceum_newGene_12098	--	--	--	--	--	--	--	--	--	0.000231408	6.23804	up	--	--	--
Panicum_miliaceum_newGene_12109	0.0504301	1.84464	normal	--	--	--	0.00120239	1.85004	up	0.00136487	2.37496	up	0.0605341	1.92084	normal
Panicum_miliaceum_newGene_12114	0.0412529	-0.704541	normal	0.114382	-0.526925	normal	0.611942	-0.198677	normal	0.68557	-0.148276	normal	0.00426007	0.921607	up
Panicum_miliaceum_newGene_12117	0.315608	0.227743	normal	0.0908432	0.402484	normal	6.38052e-06	0.833242	up	0.0538794	0.564853	normal	0.754512	0.159503	normal
Panicum_miliaceum_newGene_12123	0.00763827	0.767005	up	0.503885	0.232817	normal	0.0271633	0.644169	normal	0.745272	-0.148454	normal	0.0228506	-1.27524	normal
Panicum_miliaceum_newGene_12124	9.81128e-07	3.61077	up	7.42802e-09	3.9765	up	6.58463e-16	4.58422	up	7.97842e-10	4.52219	up	--	--	--
Panicum_miliaceum_newGene_12133	1.2519e-10	1.19888	up	7.05275e-27	1.7757	up	1.50041e-38	2.10371	up	9.84308e-08	1.19288	up	0.0181664	0.86075	normal
Panicum_miliaceum_newGene_12141	0.240668	-0.215875	normal	0.966317	0.0110456	normal	0.000591418	0.605776	up	0.202353	0.352202	normal	0.439828	-0.301769	normal
Panicum_miliaceum_newGene_12142	0.0999368	0.820274	normal	0.0208103	0.886893	normal	8.2012e-05	1.40652	up	0.000573852	1.32631	up	0.253595	0.750629	normal
Panicum_miliaceum_newGene_12153	2.09891e-09	1.2513	up	1.71763e-18	1.92042	up	7.29126e-15	1.71658	up	2.25676e-16	2.21397	up	1.70059e-05	-1.15544	down
Panicum_miliaceum_newGene_12158	0.769629	-0.0800657	normal	0.528195	0.139409	normal	0.00214663	0.624601	up	0.00121506	0.843516	up	0.981277	0.00904331	normal
Panicum_miliaceum_newGene_12167	0.159012	0.213804	normal	5.84905e-06	0.596644	up	0.124562	0.358769	normal	0.0194249	0.348105	normal	0.828681	-0.147226	normal
Panicum_miliaceum_newGene_12179	0.00114362	1.84777	up	3.52618e-10	2.78912	up	5.94905e-21	3.48013	up	1.01794e-08	2.92314	up	--	--	--
Panicum_miliaceum_newGene_12180	--	--	--	1.36616e-12	3.21807	up	1.00783e-18	3.81777	up	2.06833e-08	3.1294	up	--	--	--
Panicum_miliaceum_newGene_12181	0.00020768	2.11601	up	8.36708e-11	3.15971	up	2.2371e-18	3.74681	up	1.05908e-07	3.27035	up	--	--	--
Panicum_miliaceum_newGene_12185	--	--	--	1.75572e-05	1.86854	up	4.52038e-08	2.21341	up	--	--	--	--	--	--
Panicum_miliaceum_newGene_12188	1.66383e-08	2.31247	up	6.56751e-21	3.23489	up	1.34994e-36	3.94074	up	3.7997e-12	3.37634	up	0.0131378	1.525	normal
Panicum_miliaceum_newGene_12194	0.144583	0.377356	normal	0.00146978	0.833935	up	4.63351e-10	1.45033	up	6.82195e-08	1.51606	up	0.00135465	0.974068	up
Panicum_miliaceum_newGene_12196	0.0480492	0.435855	normal	0.10773	0.360728	normal	0.0533379	0.505268	normal	0.000191974	0.770196	up	0.102883	-0.557042	normal
Panicum_miliaceum_newGene_12210	3.5351e-05	1.02476	up	0.0227796	0.736117	normal	0.00480876	0.847241	up	0.962028	0.0297857	normal	0.717414	-0.223506	normal
Panicum_miliaceum_newGene_12211	0.0153016	-1.06659	normal	0.127765	-1.4119	normal	0.83472	-0.107217	normal	0.0799594	-0.857516	normal	1.75846e-12	2.07467	up
Panicum_miliaceum_newGene_12212	--	--	--	--	--	--	--	--	--	--	--	--	0.000499589	4.4425	up
Panicum_miliaceum_newGene_12218	9.99939e-10	0.967113	up	1.07547e-12	1.56042	up	8.35675e-37	1.7591	up	3.18773e-09	1.63731	up	0.251153	-0.252351	normal
Panicum_miliaceum_newGene_12262	--	--	--	--	--	--	--	--	--	1.4539e-09	8.24592	up	--	--	--
Panicum_miliaceum_newGene_12264	--	--	--	3.68249e-10	3.02656	up	9.29415e-15	3.44956	up	3.26753e-09	3.14334	up	--	--	--
Panicum_miliaceum_newGene_12265	0.946827	-0.0211451	normal	0.196484	0.301186	normal	0.000147921	0.839335	up	3.85443e-07	1.03241	up	0.104886	0.464896	normal
Panicum_miliaceum_newGene_12268	1.07523e-06	2.04385	up	9.86169e-23	3.14809	up	2.34772e-31	3.66844	up	2.20927e-12	3.14701	up	0.0121875	1.4052	normal
Panicum_miliaceum_newGene_12273	0.789488	0.1791	normal	0.381266	-0.397335	normal	0.456538	-0.351977	normal	0.106723	-0.755341	normal	0.00126148	1.08657	up
Panicum_miliaceum_newGene_12278	0.0512504	-1.09268	normal	0.0256247	-1.38414	normal	0.0482287	-0.998308	normal	0.95479	-0.0355591	normal	6.79524e-11	3.59719	up
Panicum_miliaceum_newGene_12296	0.0411182	-1.00721	normal	0.858503	0.207115	normal	0.0556502	-0.96483	normal	0.928108	-0.0368696	normal	2.58716e-25	3.47918	up
Panicum_miliaceum_newGene_12336	0.110748	0.555517	normal	0.0281114	0.774325	normal	0.00636715	0.895651	up	0.00853259	0.866175	up	0.930101	-0.0718382	normal
Panicum_miliaceum_newGene_1234	7.11472e-19	1.87418	up	8.98807e-61	2.67686	up	2.23642e-99	2.95866	up	1.6478e-16	2.78922	up	0.44533	0.344921	normal
Panicum_miliaceum_newGene_12348	0.000133619	-0.663347	down	0.0744814	-0.347752	normal	0.0525039	-0.447131	normal	0.000146638	-0.718747	down	3.60194e-10	1.93254	up
Panicum_miliaceum_newGene_12349	--	--	--	--	--	--	--	--	--	5.10352e-06	9.31258	up	--	--	--
Panicum_miliaceum_newGene_12358	2.22118e-06	1.67568	up	6.18241e-11	2.34001	up	1.39011e-12	2.17651	up	0.430436	0.435777	normal	0.878138	0.143187	normal
Panicum_miliaceum_newGene_12395	0.375576	0.232964	normal	0.0948182	0.209416	normal	3.43498e-10	0.863313	up	0.0256308	0.789647	normal	0.467669	0.297192	normal
Panicum_miliaceum_newGene_12406	0.0870059	0.856056	normal	0.0301748	1.10803	normal	7.35645e-06	1.68149	up	2.25973e-06	1.80759	up	0.000214554	-3.64952	down
Panicum_miliaceum_newGene_12408	4.43507e-07	0.810442	up	4.40783e-05	0.830039	up	1.46768e-09	1.01998	up	0.000369283	0.772937	up	0.431077	-0.252896	normal
Panicum_miliaceum_newGene_12412	--	--	--	--	--	--	--	--	--	1.83883e-08	4.408	up	--	--	--
Panicum_miliaceum_newGene_12418	0.00808579	0.642594	up	0.0215219	0.601299	normal	0.457572	0.191721	normal	0.738711	-0.0947543	normal	0.265291	-1.29969	normal
Panicum_miliaceum_newGene_12426	--	--	--	--	--	--	--	--	--	5.43396e-08	6.61271	up	--	--	--
Panicum_miliaceum_newGene_12448	--	--	--	9.98236e-07	3.39747	up	--	--	--	--	--	--	--	--	--
Panicum_miliaceum_newGene_12462	7.1695e-05	1.22046	up	1.43118e-12	1.8736	up	1.74294e-11	1.87219	up	2.27615e-12	1.95752	up	0.557496	0.314964	normal
Panicum_miliaceum_newGene_12475	0.0972814	0.416985	normal	0.0910915	0.485828	normal	0.00199672	0.736307	up	0.000659528	0.879894	up	0.363964	0.432846	normal
Panicum_miliaceum_newGene_12504	0.406534	-0.280813	normal	0.0137133	-0.725309	normal	0.304025	-0.383319	normal	0.0623126	-0.531199	normal	0.00105008	1.02529	up
Panicum_miliaceum_newGene_12540	--	--	--	--	--	--	--	--	--	0.00328201	1.42305	up	0.761682	-0.316836	normal
Panicum_miliaceum_newGene_12556	0.0426406	0.321427	normal	0.0517138	0.307987	normal	1.36992e-07	0.988464	up	0.344719	0.36245	normal	0.702644	0.179778	normal
Panicum_miliaceum_newGene_12568	0.92016	0.046352	normal	0.331737	0.306984	normal	2.87795e-05	1.05089	up	1.02986e-10	1.65643	up	0.000856496	1.05698	up
Panicum_miliaceum_newGene_1257	3.97737e-06	1.37246	up	1.64595e-11	1.84126	up	5.63957e-15	2.09518	up	8.07062e-09	1.73722	up	0.145071	-0.799519	normal
Panicum_miliaceum_newGene_12571	5.23759e-26	2.1837	up	4.69943e-38	2.64066	up	3.66899e-47	3.00468	up	1.16895e-06	1.55603	up	0.261855	0.359631	normal
Panicum_miliaceum_newGene_12579	--	--	--	--	--	--	--	--	--	--	--	--	2.28694e-23	7.61855	up
Panicum_miliaceum_newGene_12632	0.284345	0.297074	normal	0.0105121	0.509764	normal	8.26994e-11	1.20612	up	0.000104797	1.25798	up	0.169851	0.452698	normal
Panicum_miliaceum_newGene_12636	0.397444	0.38045	normal	0.0561889	0.570074	normal	6.81413e-05	1.00258	up	0.000152664	1.1247	up	0.773118	0.133712	normal
Panicum_miliaceum_newGene_12639	0.903693	-0.0590347	normal	0.197201	-0.505002	normal	0.0214036	0.592933	normal	6.21129e-06	1.10812	up	5.63938e-06	1.68241	up
Panicum_miliaceum_newGene_12671	--	--	--	--	--	--	--	--	--	--	--	--	5.54315e-07	2.78425	up
Panicum_miliaceum_newGene_12678	3.12469e-07	2.03189	up	6.5822e-16	2.97876	up	1.9487e-37	3.76785	up	7.46518e-12	3.16631	up	0.0580185	1.17404	normal
Panicum_miliaceum_newGene_12679	--	--	--	1.70931e-09	3.90183	up	1.8279e-14	4.53884	up	--	--	--	--	--	--
Panicum_miliaceum_newGene_12684	--	--	--	--	--	--	--	--	--	--	--	--	2.52482e-09	3.32712	up
Panicum_miliaceum_newGene_12686	0.212261	-0.851649	normal	0.015355	-1.60332	normal	0.00858275	-2.28099	down	0.0127209	-1.67708	normal	0.000453961	1.4954	up
Panicum_miliaceum_newGene_12731	0.623137	0.158888	normal	0.984563	0.00780657	normal	0.00155389	0.787902	up	0.134127	0.489573	normal	0.0506597	-0.711774	normal
Panicum_miliaceum_newGene_12769	0.912234	0.0454422	normal	0.660353	0.182626	normal	0.0775853	0.5836	normal	0.400414	0.300848	normal	0.00150321	1.13749	up
Panicum_miliaceum_newGene_1280	1.36533e-21	2.22514	up	1.58944e-46	3.39646	up	2.70402e-97	4.11297	up	9.27765e-19	3.20428	up	0.0168251	0.790922	normal
Panicum_miliaceum_newGene_12840	--	--	--	--	--	--	--	--	--	--	--	--	1.77515e-07	3.85422	up
Panicum_miliaceum_newGene_12842	3.63182e-09	1.75013	up	1.23834e-29	2.65976	up	9.21539e-56	3.34505	up	3.01643e-28	2.96283	up	0.0057384	1.59421	up
Panicum_miliaceum_newGene_12871	0.927957	0.0234733	normal	0.464002	0.1386	normal	0.00326543	0.503693	normal	1.4772e-05	0.897744	up	0.0505192	0.457459	normal
Panicum_miliaceum_newGene_12915	--	--	--	--	--	--	2.37468e-09	4.59779	up	--	--	--	--	--	--
Panicum_miliaceum_newGene_12960	0.278454	0.404824	normal	0.139857	0.53323	normal	0.0702241	0.617617	normal	0.548562	0.248513	normal	7.35365e-07	1.76535	up
Panicum_miliaceum_newGene_1297	6.71953e-09	3.19583	up	2.0227e-20	4.59928	up	1.53672e-35	5.97177	up	9.1794e-21	5.30363	up	0.188384	1.64488	normal
Panicum_miliaceum_newGene_13007	0.000690581	1.10567	up	7.26238e-11	2.12126	up	3.83194e-22	2.84749	up	4.64009e-07	1.915	up	0.252933	0.628933	normal
Panicum_miliaceum_newGene_13015	6.58482e-07	2.16386	up	2.62771e-13	3.00905	up	1.23293e-23	3.92998	up	3.33082e-09	3.05921	up	--	--	--
Panicum_miliaceum_newGene_13050	0.17763	1.43023	normal	0.622073	0.446268	normal	0.577363	-0.409491	normal	0.00039854	1.94433	up	0.735265	-0.549319	normal
Panicum_miliaceum_newGene_13057	0.214528	1.53906	normal	--	--	--	--	--	--	0.00796299	2.11005	up	--	--	--
Panicum_miliaceum_newGene_13104	--	--	--	--	--	--	--	--	--	--	--	--	6.96194e-08	6.4656	up
Panicum_miliaceum_newGene_13108	0.00145191	0.491868	normal	3.7189e-10	0.893258	up	1.85489e-09	1.09023	up	4.89151e-25	1.53748	up	6.84279e-07	0.891212	up
Panicum_miliaceum_newGene_1312	0.386645	0.183468	normal	0.0922945	0.326312	normal	0.39772	0.167124	normal	0.00166586	0.603582	up	0.00140983	0.739249	up
Panicum_miliaceum_newGene_13120	0.316419	-0.577493	normal	0.568916	-0.347087	normal	0.328682	0.498611	normal	7.49676e-09	2.28617	up	0.0752406	1.35013	normal
Panicum_miliaceum_newGene_13134	0.0732371	-0.466996	normal	0.196182	0.52892	normal	5.61983e-10	1.50301	up	0.000285785	1.19667	up	0.183029	0.43275	normal
Panicum_miliaceum_newGene_13135	0.250934	0.475843	normal	3.04323e-07	1.92216	up	4.07363e-24	2.90174	up	1.67893e-07	2.43016	up	0.32422	0.580609	normal
Panicum_miliaceum_newGene_13156	0.501037	0.311225	normal	0.000332773	1.1568	up	8.37996e-06	1.7344	up	0.0345715	0.953125	normal	0.00500924	-1.3294	down
Panicum_miliaceum_newGene_13161	--	--	--	--	--	--	--	--	--	--	--	--	1.18231e-16	3.85903	up
Panicum_miliaceum_newGene_13164	0.137638	0.385817	normal	0.0112452	0.614173	normal	3.16148e-08	1.34829	up	6.20769e-08	1.6395	up	0.151814	-0.516499	normal
Panicum_miliaceum_newGene_13170	0.135147	0.358236	normal	1.70017e-06	0.935203	up	9.01705e-08	0.986418	up	0.174914	0.32025	normal	0.00119721	0.790583	up
Panicum_miliaceum_newGene_13181	0.533429	0.261314	normal	0.006689	0.623805	up	1.59767e-05	1.04881	up	0.00687657	0.996978	up	5.97296e-11	1.72683	up
Panicum_miliaceum_newGene_1319	6.46308e-08	1.26019	up	2.16464e-21	2.04703	up	2.10581e-17	1.76703	up	0.00675043	0.830628	up	0.189976	-1.41575	normal
Panicum_miliaceum_newGene_1320	6.79987e-17	4.86519	up	1.27821e-11	7.07564	up	2.21838e-15	8.30314	up	8.0196e-16	8.53402	up	0.0107748	3.0554	normal
Panicum_miliaceum_newGene_1321	--	--	--	1.27506e-05	3.90626	up	1.69497e-10	4.89738	up	--	--	--	--	--	--
Panicum_miliaceum_newGene_13217	1.99057e-07	0.989481	up	0.00472975	0.704892	up	2.9417e-05	1.17507	up	0.00984681	0.999109	up	0.00064324	1.49596	up
Panicum_miliaceum_newGene_13247	0.45033	-0.252273	normal	0.465639	-0.218919	normal	0.796554	0.0841257	normal	0.00754027	0.682968	up	0.659649	0.24581	normal
Panicum_miliaceum_newGene_13250	0.120337	0.921313	normal	0.0001036	2.02071	up	3.92343e-16	3.12965	up	3.78542e-17	3.85313	up	0.738863	-0.527306	normal
Panicum_miliaceum_newGene_13251	0.635272	-0.112277	normal	0.425892	0.18327	normal	0.000174058	0.643812	up	0.0839609	0.545175	normal	0.0428864	0.743623	normal
Panicum_miliaceum_newGene_13255	--	--	--	--	--	--	--	--	--	--	--	--	3.47367e-07	3.80535	up
Panicum_miliaceum_newGene_13257	0.567249	-0.197816	normal	0.869207	0.075178	normal	0.000976103	0.83862	up	0.000783092	1.16719	up	0.0121772	-1.17002	normal
Panicum_miliaceum_newGene_13283	--	--	--	--	--	--	--	--	--	--	--	--	5.71407e-16	6.10463	up
Panicum_miliaceum_newGene_13287	3.65192e-24	1.39149	up	3.75689e-50	2.00533	up	7.45407e-95	2.52615	up	1.99109e-32	2.47684	up	0.556658	-0.323045	normal
Panicum_miliaceum_newGene_13288	0.908647	0.0947213	normal	0.583141	0.359691	normal	0.0258411	1.07673	normal	0.00657023	1.47176	up	0.42752	0.800602	normal
Panicum_miliaceum_newGene_13290	0.203063	0.61579	normal	0.000583527	1.17091	up	0.016744	1.05879	normal	1.19587e-10	1.91201	up	0.85009	0.130233	normal
Panicum_miliaceum_newGene_13295	0.310364	-0.523693	normal	0.419888	-0.425893	normal	0.931575	-0.062546	normal	0.00176724	-1.59495	down	0.000860977	1.73455	up
Panicum_miliaceum_newGene_13315	1.48089e-09	1.84015	up	1.30458e-11	2.04508	up	3.46999e-18	2.46986	up	0.00161907	1.15529	up	0.969441	0.035529	normal
Panicum_miliaceum_newGene_13316	0.000213243	1.52403	up	7.03874e-07	2.06761	up	1.09524e-14	2.68889	up	4.65132e-13	2.41849	up	--	--	--
Panicum_miliaceum_newGene_13317	0.0174185	0.475505	normal	0.00145604	0.583947	normal	0.00115742	0.67127	up	0.00282237	0.600967	up	0.505124	-0.32525	normal
Panicum_miliaceum_newGene_13327	0.114766	0.824189	normal	0.00530617	1.45851	up	0.000646398	1.42374	up	0.761236	0.219359	normal	0.311438	-1.05759	normal
Panicum_miliaceum_newGene_13359	0.0633051	0.715464	normal	0.0629242	0.673578	normal	0.0399207	0.757436	normal	0.0284768	0.795201	normal	0.00402133	1.15067	up
Panicum_miliaceum_newGene_13365	--	--	--	0.0219314	1.19791	normal	--	--	--	0.00425607	1.38654	up	0.0357757	1.31221	normal
Panicum_miliaceum_newGene_13373	9.11023e-08	1.00788	up	4.253e-08	0.835641	up	0.000172993	0.764914	up	0.129998	0.306369	normal	0.799114	0.105444	normal
Panicum_miliaceum_newGene_13379	2.58542e-06	1.40253	up	2.7472e-05	1.68055	up	9.88176e-13	2.39922	up	4.61422e-06	1.71435	up	0.407429	0.59159	normal
Panicum_miliaceum_newGene_13388	--	--	--	6.99122e-09	2.83139	up	7.13445e-14	3.31313	up	--	--	--	--	--	--
Panicum_miliaceum_newGene_13399	0.000254707	2.13655	up	2.27952e-07	2.8038	up	1.07781e-13	3.52491	up	--	--	--	--	--	--
Panicum_miliaceum_newGene_13401	4.75925e-06	2.79086	up	7.52578e-11	3.79488	up	9.77222e-17	4.29882	up	1.76706e-07	3.44831	up	--	--	--
Panicum_miliaceum_newGene_13415	0.779131	0.0718441	normal	0.984209	0.00523862	normal	0.294014	0.273304	normal	0.00590149	0.620459	up	0.114444	0.489612	normal
Panicum_miliaceum_newGene_13416	--	--	--	6.93183e-07	2.97897	up	7.10204e-12	3.53264	up	--	--	--	--	--	--
Panicum_miliaceum_newGene_13451	0.00121066	0.657469	up	9.70512e-05	0.731081	up	3.64398e-11	1.23603	up	0.00708889	0.826056	up	0.73133	0.124325	normal
Panicum_miliaceum_newGene_13481	0.592839	0.117088	normal	0.0770678	0.462479	normal	0.00661015	0.593806	up	0.000760176	0.758934	up	0.299931	0.416099	normal
Panicum_miliaceum_newGene_13501	0.386407	-0.174345	normal	0.588865	0.108301	normal	0.0037797	0.490742	normal	8.12701e-05	0.815242	up	0.0798722	-0.427792	normal
Panicum_miliaceum_newGene_13528	0.47432	-0.248249	normal	0.27724	0.258876	normal	1.20201e-06	1.18936	up	1.16432e-08	1.50564	up	0.78648	-0.0906839	normal
Panicum_miliaceum_newGene_13548	0.487594	0.268677	normal	0.0292734	0.593139	normal	0.00329357	0.712084	up	0.00114608	1.08182	up	1.17929e-05	1.73392	up
Panicum_miliaceum_newGene_1355	0.0297071	2.32401	normal	0.000260021	3.55847	up	7.69598e-06	4.08138	up	0.000219702	2.56264	up	0.00404644	3.34185	up
Panicum_miliaceum_newGene_13561	0.068665	0.807196	normal	0.00505196	1.29994	up	0.000265194	1.54242	up	0.905734	0.0775944	normal	0.889018	-0.119977	normal
Panicum_miliaceum_newGene_13573	--	--	--	6.32429e-09	3.12078	up	3.07411e-18	3.88373	up	--	--	--	--	--	--
Panicum_miliaceum_newGene_13574	--	--	--	--	--	--	3.39687e-10	3.80074	up	--	--	--	--	--	--
Panicum_miliaceum_newGene_1358	0.0581171	0.562298	normal	0.423563	-0.513277	normal	0.243815	0.337143	normal	0.000164407	1.35485	up	0.62394	-0.671406	normal
Panicum_miliaceum_newGene_13586	0.000122412	1.97293	up	5.81011e-13	2.99366	up	1.37575e-22	3.69907	up	1.58266e-07	2.941	up	--	--	--
Panicum_miliaceum_newGene_1359	0.00932021	0.717799	up	1.10781e-05	1.04081	up	1.43874e-08	1.25732	up	6.97582e-07	1.19942	up	0.933942	-0.0673821	normal
Panicum_miliaceum_newGene_1360	0.00236395	0.798893	up	0.000450326	0.93617	up	1.6494e-05	1.17272	up	0.122573	0.479035	normal	0.64986	0.267714	normal
Panicum_miliaceum_newGene_13619	--	--	--	9.84354e-08	3.10194	up	1.40591e-14	3.88075	up	--	--	--	--	--	--
Panicum_miliaceum_newGene_13620	--	--	--	--	--	--	1.75132e-08	3.31943	up	--	--	--	--	--	--
Panicum_miliaceum_newGene_13621	--	--	--	--	--	--	1.67623e-09	5.2027	up	--	--	--	--	--	--
Panicum_miliaceum_newGene_13624	--	--	--	6.63577e-06	2.71136	up	5.26451e-11	3.42799	up	--	--	--	--	--	--
Panicum_miliaceum_newGene_13625	1.46289e-06	2.49428	up	8.23586e-12	3.25212	up	1.54583e-22	3.96084	up	1.91316e-09	3.42804	up	--	--	--
Panicum_miliaceum_newGene_13628	--	--	--	2.13566e-08	2.76303	up	1.10727e-16	3.43996	up	5.04678e-07	2.79382	up	--	--	--
Panicum_miliaceum_newGene_1363	3.87351e-06	1.05662	up	2.43342e-21	1.74955	up	7.51836e-41	2.56887	up	6.86155e-12	1.74516	up	0.202032	0.374007	normal
Panicum_miliaceum_newGene_13633	0.62828	-0.122507	normal	0.126035	0.311788	normal	0.0163735	0.47276	normal	0.00276737	0.720316	up	0.979026	0.0094854	normal
Panicum_miliaceum_newGene_13639	--	--	--	--	--	--	6.19468e-10	3.37189	up	--	--	--	--	--	--
Panicum_miliaceum_newGene_13640	--	--	--	5.66314e-08	2.86685	up	3.47309e-14	3.4122	up	--	--	--	--	--	--
Panicum_miliaceum_newGene_13651	0.297129	0.242429	normal	0.767046	0.0803353	normal	0.0534199	0.409044	normal	0.00264748	0.647306	up	0.0590139	0.633187	normal
Panicum_miliaceum_newGene_13675	--	--	--	--	--	--	2.49888e-09	3.2605	up	--	--	--	--	--	--
Panicum_miliaceum_newGene_13676	0.368775	-0.200629	normal	0.946115	-0.0168099	normal	0.000214557	0.653131	up	0.000104497	0.796936	up	0.439759	-0.242806	normal
Panicum_miliaceum_newGene_13687	1.64475e-05	2.22505	up	5.58039e-14	3.18449	up	4.04546e-28	3.93868	up	7.00489e-11	3.30745	up	--	--	--
Panicum_miliaceum_newGene_13689	0.942845	-0.0291324	normal	0.0899047	0.501367	normal	1.2879e-05	1.19972	up	0.000585947	1.54484	up	0.827239	0.165651	normal
Panicum_miliaceum_newGene_13694	--	--	--	--	--	--	1.62709e-22	4.3479	up	8.60255e-10	3.61185	up	--	--	--
Panicum_miliaceum_newGene_13700	0.831578	-0.0867805	normal	0.558421	0.204183	normal	0.000185354	1.03363	up	4.61774e-07	1.28557	up	0.0127967	-1.01731	normal
Panicum_miliaceum_newGene_13710	4.51745e-09	4.64623	up	--	--	--	1.01229e-11	5.30943	up	--	--	--	--	--	--
Panicum_miliaceum_newGene_13746	0.882178	0.107492	normal	0.0264394	0.852072	normal	0.0544842	0.732005	normal	1.21529e-07	1.85835	up	0.294116	0.571004	normal
Panicum_miliaceum_newGene_13770	0.0759757	0.687537	normal	0.107	0.671814	normal	0.00226693	1.05797	up	0.0460056	1.01467	normal	0.353288	-0.642833	normal
Panicum_miliaceum_newGene_13772	0.00807915	0.821514	up	0.00010645	1.47091	up	3.29329e-07	1.62386	up	0.00364017	1.18184	up	2.8818e-05	2.103	up
Panicum_miliaceum_newGene_13787	0.193287	0.487596	normal	0.00673965	0.797495	up	0.000869422	0.999535	up	1.58144e-06	1.40449	up	0.478583	-0.61364	normal
Panicum_miliaceum_newGene_13795	--	--	--	--	--	--	--	--	--	--	--	--	7.42527e-07	2.43523	up
Panicum_miliaceum_newGene_13797	0.637161	0.137523	normal	0.000322394	0.788611	up	2.52517e-10	1.08639	up	2.7872e-06	1.46227	up	0.0284529	0.573292	normal
Panicum_miliaceum_newGene_13835	0.0161516	-0.70418	normal	0.202945	-0.904664	normal	0.0222215	-0.812314	normal	0.0221131	-0.755578	normal	2.46949e-06	1.24809	up
Panicum_miliaceum_newGene_13851	--	--	--	--	--	--	--	--	--	0.000606809	1.53773	up	0.318983	0.713101	normal
Panicum_miliaceum_newGene_1387	0.00423329	1.50394	up	--	--	--	3.81335e-07	2.23265	up	0.0232928	1.14513	normal	0.00550292	1.751	up
Panicum_miliaceum_newGene_13898	0.928327	-0.0419603	normal	0.949904	0.0210986	normal	0.915004	0.0346077	normal	0.1317	0.48451	normal	0.00376754	1.3053	up
Panicum_miliaceum_newGene_13908	0.166169	0.411711	normal	2.00343e-05	1.02631	up	8.79414e-11	1.52366	up	2.3755e-07	2.07947	up	0.000809447	1.36621	up
Panicum_miliaceum_newGene_13909	--	--	--	1.41897e-08	3.40113	up	4.71238e-09	3.6971	up	2.44547e-12	4.01141	up	--	--	--
Panicum_miliaceum_newGene_13916	1.75884e-10	1.19851	up	7.98655e-21	1.69797	up	5.73059e-24	1.95151	up	2.86937e-08	1.63245	up	0.195158	0.475609	normal
Panicum_miliaceum_newGene_13927	0.540076	-0.207267	normal	0.0551649	-0.494771	normal	0.0423132	-0.538517	normal	0.000946666	-0.991496	down	0.00769854	1.14275	up
Panicum_miliaceum_newGene_13938	0.544274	0.128432	normal	0.124763	0.331805	normal	0.00799422	0.654218	up	0.323027	-0.306092	normal	0.570777	-0.174435	normal
Panicum_miliaceum_newGene_13951	--	--	--	--	--	--	--	--	--	--	--	--	0.000863754	2.66817	up
Panicum_miliaceum_newGene_13953	0.758905	0.224817	normal	0.0676588	0.873294	normal	0.0017159	1.30479	up	0.00254023	1.56069	up	0.0252511	1.49816	normal
Panicum_miliaceum_newGene_13966	7.19825e-05	0.940143	up	0.000141263	1.18475	up	4.12205e-06	1.18981	up	0.000254412	1.20436	up	0.779282	0.175522	normal
Panicum_miliaceum_newGene_14019	1.2758e-08	0.952682	up	8.34284e-22	1.95462	up	4.2295e-53	2.6854	up	2.22336e-27	3.18944	up	1.39823e-12	1.68681	up
Panicum_miliaceum_newGene_14023	0.946731	-0.0312806	normal	0.497625	0.285173	normal	0.000854925	0.88764	up	0.000218238	1.36064	up	0.00684509	1.1216	up
Panicum_miliaceum_newGene_14046	1.41455e-05	0.900903	up	7.67342e-11	1.61783	up	4.9321e-25	1.86925	up	8.87464e-13	2.13655	up	0.895875	-0.0658998	normal
Panicum_miliaceum_newGene_14048	6.13096e-06	1.09748	up	3.47164e-18	2.13645	up	7.52592e-36	2.65503	up	4.46201e-10	2.36662	up	0.344955	-0.580715	normal
Panicum_miliaceum_newGene_1407	2.24136e-08	0.900418	up	7.76226e-12	1.14802	up	3.52127e-20	1.33669	up	9.46642e-05	0.903681	up	0.212501	0.338864	normal
Panicum_miliaceum_newGene_14072	--	--	--	--	--	--	--	--	--	--	--	--	0.00277009	2.20407	up
Panicum_miliaceum_newGene_14079	0.174567	0.291085	normal	0.000156585	0.592137	up	0.0656044	0.377057	normal	0.649273	-0.106986	normal	5.05562e-11	1.1486	up
Panicum_miliaceum_newGene_14080	0.68222	-0.127555	normal	0.920997	0.0559179	normal	0.451931	0.194117	normal	5.15762e-05	0.83458	up	0.481898	0.359991	normal
Panicum_miliaceum_newGene_14113	0.844384	-0.0713601	normal	0.679435	0.122221	normal	0.00656535	0.788984	up	0.00532127	0.760041	up	0.186976	0.497098	normal
Panicum_miliaceum_newGene_14114	0.0773076	0.434186	normal	3.1445e-05	0.921951	up	2.73261e-18	1.56141	up	3.05015e-09	1.67045	up	0.00473871	0.746686	up
Panicum_miliaceum_newGene_14121	0.849917	-0.0459844	normal	0.00338113	0.511259	normal	2.67837e-07	0.891234	up	0.00277842	0.720937	up	0.975821	-0.0121074	normal
Panicum_miliaceum_newGene_14122	0.00299769	0.536748	normal	6.37231e-19	1.64744	up	2.02165e-18	1.96775	up	6.30736e-16	1.83812	up	0.820852	0.0752594	normal
Panicum_miliaceum_newGene_14132	--	--	--	0.00118435	2.88404	up	7.87645e-05	3.22493	up	--	--	--	--	--	--
Panicum_miliaceum_newGene_14146	0.288096	-0.295028	normal	0.746909	0.100475	normal	0.0696726	0.537181	normal	0.00873966	0.779707	up	0.335397	0.365246	normal
Panicum_miliaceum_newGene_14147	--	--	--	--	--	--	1.97242e-08	2.84098	up	8.66773e-07	3.0217	up	0.000125345	2.46856	up
Panicum_miliaceum_newGene_14152	3.70204e-06	0.915053	up	1.07704e-15	1.58611	up	3.49023e-17	1.84312	up	0.00885743	1.13322	up	0.664429	-0.179978	normal
Panicum_miliaceum_newGene_14153	0.90465	-0.0352293	normal	0.0410377	0.495288	normal	0.00163001	0.55883	normal	0.00403372	0.646455	up	0.0411669	-0.607438	normal
Panicum_miliaceum_newGene_14154	0.845808	0.0521634	normal	0.0228793	0.560096	normal	1.32125e-11	1.28998	up	0.0032445	0.961729	up	0.00463992	-0.755943	down
Panicum_miliaceum_newGene_14155	0.378707	0.295909	normal	0.224179	0.36527	normal	4.55971e-07	1.32347	up	0.0725978	0.608449	normal	0.000407444	-1.00001	down
Panicum_miliaceum_newGene_14164	0.00887859	0.905851	up	8.92518e-07	1.45142	up	2.22266e-08	1.46405	up	0.101107	0.53529	normal	0.923429	0.0637287	normal
Panicum_miliaceum_newGene_14194	0.00116944	0.694533	up	5.46054e-10	1.16211	up	2.82569e-27	1.77304	up	9.7107e-09	1.74402	up	0.558614	0.288993	normal
Panicum_miliaceum_newGene_14218	0.000719914	0.946594	up	0.00383029	1.07774	up	0.000677423	1.09501	up	0.0265254	0.783592	normal	0.265997	0.484569	normal
Panicum_miliaceum_newGene_14228	0.0248921	0.599137	normal	0.00155735	0.874788	up	1.45142e-06	1.20849	up	0.319645	0.361173	normal	0.154377	0.5489	normal
Panicum_miliaceum_newGene_14231	0.882278	-0.06459	normal	0.619945	0.166866	normal	0.00279402	0.770427	up	0.139889	0.441163	normal	0.117846	-0.507661	normal
Panicum_miliaceum_newGene_14236	0.345261	-0.331144	normal	0.812685	-0.0897054	normal	0.000174863	0.814065	up	0.0569522	0.697231	normal	0.0328875	-0.825156	normal
Panicum_miliaceum_newGene_14243	0.00258112	-1.01888	down	0.000944531	-1.07126	down	3.11924e-08	-1.32125	down	0.19348	-0.414953	normal	1.14564e-06	1.3908	up
Panicum_miliaceum_newGene_14257	0.284455	-0.19785	normal	0.0669394	-0.342995	normal	0.060395	-0.316489	normal	0.139479	-0.328904	normal	0.000549932	1.04111	up
Panicum_miliaceum_newGene_14258	0.345525	0.234404	normal	0.0863009	0.332974	normal	0.321952	0.221976	normal	0.940858	-0.0202895	normal	3.66588e-08	1.32289	up
Panicum_miliaceum_newGene_14261	1.12647e-08	1.21742	up	0.00222965	0.80854	up	0.0118405	0.613669	normal	0.0157123	0.838918	normal	0.515892	0.351289	normal
Panicum_miliaceum_newGene_14267	0.0127457	0.746371	normal	3.4718e-06	1.56304	up	5.65401e-17	2.09463	up	7.31939e-08	1.77473	up	0.212196	0.739868	normal
Panicum_miliaceum_newGene_14279	0.00622595	2.30294	up	--	--	--	0.391426	0.81825	normal	--	--	--	--	--	--
Panicum_miliaceum_newGene_14281	0.000669832	0.67004	up	4.98807e-05	0.964831	up	2.46025e-12	1.60665	up	1.79489e-11	1.69642	up	0.453196	-0.850309	normal
Panicum_miliaceum_newGene_143	3.10322e-05	-0.97896	down	0.0021245	-0.863184	down	1.86263e-05	-1.0543	down	2.06591e-06	-1.31809	down	0.00078961	0.923911	up
Panicum_miliaceum_newGene_14307	--	--	--	0.0488452	1.04356	normal	0.00132762	1.4313	up	--	--	--	--	--	--
Panicum_miliaceum_newGene_14315	2.84683e-13	3.81343	up	1.66486e-33	4.70102	up	3.65055e-51	5.55393	up	3.95486e-20	4.82935	up	0.0789026	1.48388	normal
Panicum_miliaceum_newGene_14316	3.14457e-26	3.58904	up	9.35414e-44	4.49246	up	8.73528e-59	5.50588	up	2.32231e-18	4.64815	up	--	--	--
Panicum_miliaceum_newGene_14358	--	--	--	--	--	--	--	--	--	--	--	--	3.55144e-06	2.92857	up
Panicum_miliaceum_newGene_14371	0.0199528	0.87365	normal	0.000665811	1.03988	up	2.91584e-12	1.53735	up	2.67451e-28	3.72956	up	0.963316	0.0290139	normal
Panicum_miliaceum_newGene_14384	0.00638135	0.565631	normal	5.79612e-05	0.59084	up	1.2092e-08	0.904836	up	0.372488	0.291959	normal	0.406283	0.2773	normal
Panicum_miliaceum_newGene_1440	0.920231	0.0680487	normal	0.00807408	1.09617	up	0.462702	0.371208	normal	0.60249	-0.309367	normal	0.756377	-0.262317	normal
Panicum_miliaceum_newGene_14404	--	--	--	--	--	--	2.80237e-07	4.22406	up	1.92312e-15	5.78358	up	--	--	--
Panicum_miliaceum_newGene_14409	0.00112623	0.479381	normal	6.01085e-08	0.950547	up	9.43098e-21	1.41376	up	0.000107867	1.09645	up	0.0112715	0.721347	normal
Panicum_miliaceum_newGene_14411	0.00208195	0.544398	normal	0.000776349	0.897196	up	2.14412e-07	1.32086	up	0.262308	0.357662	normal	0.898411	-0.0919955	normal
Panicum_miliaceum_newGene_1444	0.668251	-0.100589	normal	0.0965835	0.294618	normal	1.35855e-06	0.686386	up	0.000172828	0.765994	up	0.0613636	0.438567	normal
Panicum_miliaceum_newGene_14451	6.1605e-16	0.943323	up	4.12663e-28	1.44753	up	3.16174e-27	1.47317	up	1.88632e-10	1.47932	up	0.0770183	-0.410908	normal
Panicum_miliaceum_newGene_14454	0.860624	0.100234	normal	0.00367222	1.05049	up	0.150973	0.490979	normal	0.0374157	0.777313	normal	0.0189923	-2.89393	normal
Panicum_miliaceum_newGene_14461	0.00695144	0.441389	normal	1.53568e-13	1.07402	up	1.37058e-29	1.502	up	4.24787e-07	1.21569	up	0.217115	0.271035	normal
Panicum_miliaceum_newGene_14464	0.00031512	1.20409	up	6.58688e-10	1.85669	up	1.21546e-25	2.97793	up	1.01769e-13	3.06334	up	0.855952	-0.140528	normal
Panicum_miliaceum_newGene_14481	--	--	--	0.0747005	0.974192	normal	0.0177906	1.37049	normal	3.272e-16	3.04725	up	0.315539	0.777212	normal
Panicum_miliaceum_newGene_14489	0.0164039	0.688471	normal	0.0015598	1.03453	up	9.35221e-05	0.927742	up	0.00034721	1.02509	up	0.00339138	-1.35598	down
Panicum_miliaceum_newGene_14500	0.157005	0.867111	normal	0.00313027	1.63657	up	8.06013e-06	2.13422	up	0.000214928	1.82876	up	0.691395	-0.483696	normal
Panicum_miliaceum_newGene_14501	0.0014222	1.15975	up	3.96993e-06	1.71554	up	4.43313e-15	2.43454	up	3.81503e-08	2.57577	up	0.286508	-0.722811	normal
Panicum_miliaceum_newGene_14515	0.0348999	0.67064	normal	0.0678577	0.687266	normal	0.000908089	1.01963	up	0.000865506	1.00616	up	0.759004	0.213913	normal
Panicum_miliaceum_newGene_14532	0.316419	-0.256923	normal	0.0127275	-0.657876	normal	0.945661	-0.019096	normal	0.877607	-0.0456616	normal	0.00384087	0.956354	up
Panicum_miliaceum_newGene_14546	5.61666e-06	2.29135	up	8.15726e-08	2.63961	up	1.43978e-11	3.20945	up	4.66813e-10	3.25434	up	--	--	--
Panicum_miliaceum_newGene_14583	0.0462332	0.431575	normal	0.00864287	0.637928	up	1.99465e-05	0.853256	up	0.0263123	0.679309	normal	0.0886596	0.601287	normal
Panicum_miliaceum_newGene_14608	0.0735364	0.511791	normal	1.40981e-05	0.915377	up	2.85438e-11	1.37922	up	1.61101e-08	1.32982	up	0.211874	0.355294	normal
Panicum_miliaceum_newGene_1461	0.165915	0.389158	normal	0.53175	0.235793	normal	0.749394	0.115831	normal	0.000819097	0.838513	up	0.316229	-0.58252	normal
Panicum_miliaceum_newGene_14618	0.000178117	1.45017	up	0.00152606	1.35339	up	4.66421e-07	1.82771	up	0.465038	0.436939	normal	0.165904	0.973056	normal
Panicum_miliaceum_newGene_1463	0.00147253	1.70272	up	--	--	--	--	--	--	--	--	--	--	--	--
Panicum_miliaceum_newGene_14634	0.255431	0.483136	normal	0.0463686	0.763209	normal	0.00254734	1.14943	up	4.18976e-07	1.66391	up	0.967199	-0.0438737	normal
Panicum_miliaceum_newGene_14663	0.113124	0.733339	normal	5.42661e-05	1.5313	up	3.19003e-13	2.06496	up	3.65565e-13	2.42713	up	5.33824e-16	3.14193	up
Panicum_miliaceum_newGene_1468	0.83465	0.08006	normal	0.156368	0.377599	normal	0.00105148	0.716894	up	0.00233019	1.00614	up	0.00115711	0.897096	up
Panicum_miliaceum_newGene_14686	0.837368	-0.0801045	normal	0.272563	-0.30154	normal	0.271317	0.266166	normal	0.0029732	0.723339	up	0.512387	0.342285	normal
Panicum_miliaceum_newGene_14687	0.0416177	0.935395	normal	0.970614	-0.0226634	normal	0.00462184	0.914964	up	0.0168043	1.12302	normal	0.0238999	1.34449	normal
Panicum_miliaceum_newGene_14707	0.439546	0.2137	normal	0.0636253	0.455584	normal	0.00324313	0.722658	up	6.26439e-07	1.23325	up	0.354767	0.394873	normal
Panicum_miliaceum_newGene_14752	4.88465e-09	2.32676	up	3.55932e-06	2.18788	up	0.00135043	1.78474	up	0.346804	0.623344	normal	0.308062	1.00482	normal
Panicum_miliaceum_newGene_14766	0.679121	-0.234818	normal	0.0757311	-0.879824	normal	0.977065	-0.0152356	normal	0.87417	0.0908128	normal	1.25239e-11	2.65064	up
Panicum_miliaceum_newGene_14801	0.9342	-0.0235024	normal	0.344864	-0.19972	normal	0.107209	-0.375223	normal	0.618297	-0.170158	normal	0.000618588	0.866222	up
Panicum_miliaceum_newGene_14810	0.869658	0.0581289	normal	0.546888	0.195243	normal	0.00837398	0.734958	up	0.00429734	0.939312	up	0.951481	0.029905	normal
Panicum_miliaceum_newGene_14811	0.0188598	0.705865	normal	2.45219e-08	1.35918	up	1.96984e-12	1.61204	up	1.05457e-08	1.6779	up	0.493712	0.301855	normal
Panicum_miliaceum_newGene_14813	0.444701	0.242513	normal	0.0876807	0.735908	normal	1.68714e-06	0.875012	up	4.85026e-05	1.33244	up	0.00743355	0.660353	up
Panicum_miliaceum_newGene_14816	0.978692	0.0104665	normal	0.727495	0.096795	normal	0.0470089	0.42363	normal	0.00118169	0.888319	up	2.70337e-25	3.24186	up
Panicum_miliaceum_newGene_14819	0.000642468	2.75874	up	1.5637e-08	4.26958	up	2.17214e-05	4.7467	up	0.00499253	2.48291	up	0.285782	1.78334	normal
Panicum_miliaceum_newGene_14830	0.44958	-0.411594	normal	0.0210082	-1.07352	normal	0.00574982	-0.852105	down	0.0367806	-0.852522	normal	0.00126529	0.937012	up
Panicum_miliaceum_newGene_14833	--	--	--	--	--	--	--	--	--	--	--	--	0.000493632	2.68997	up
Panicum_miliaceum_newGene_14871	3.92522e-05	0.904027	up	0.0148043	0.769727	normal	1.8947e-11	1.61762	up	7.45689e-08	1.93328	up	0.680403	0.213893	normal
Panicum_miliaceum_newGene_14872	0.253363	0.454494	normal	0.329322	0.561057	normal	0.210142	0.406377	normal	4.58803e-05	1.50006	up	7.16476e-18	3.69082	up
Panicum_miliaceum_newGene_14882	0.19412	0.388525	normal	0.119218	0.488818	normal	7.23882e-06	1.22024	up	0.00530305	0.927536	up	0.536408	0.324748	normal
Panicum_miliaceum_newGene_14902	0.0712053	0.380565	normal	0.137715	0.350767	normal	0.00138493	0.799469	up	1.43109e-08	1.09121	up	2.96879e-15	2.18177	up
Panicum_miliaceum_newGene_14916	0.00121505	1.41079	up	6.11216e-14	2.39118	up	2.56642e-25	3.3158	up	9.75467e-22	3.42055	up	0.678663	-0.29647	normal
Panicum_miliaceum_newGene_14926	--	--	--	1.7999e-08	3.09459	up	4.80072e-12	3.41154	up	4.96797e-07	2.94837	up	--	--	--
Panicum_miliaceum_newGene_14927	5.96935e-12	1.16584	up	1.61721e-21	1.45045	up	4.43242e-40	1.63705	up	1.14048e-38	1.9664	up	4.28928e-08	1.67741	up
Panicum_miliaceum_newGene_14935	0.237086	0.331398	normal	0.0445562	0.428041	normal	0.062328	0.382224	normal	0.000811946	0.814994	up	0.956886	0.0232944	normal
Panicum_miliaceum_newGene_1498	--	--	--	--	--	--	--	--	--	--	--	--	2.53311e-06	3.86609	up
Panicum_miliaceum_newGene_14989	0.759114	-0.212889	normal	0.815844	0.143787	normal	0.0467992	0.930746	normal	1.46155e-05	2.43932	up	0.560602	0.474165	normal
Panicum_miliaceum_newGene_14993	5.62603e-16	1.8532	up	1.12178e-30	2.58242	up	2.4469e-49	2.71969	up	1.70658e-14	1.84711	up	0.367778	0.408003	normal
Panicum_miliaceum_newGene_14994	0.0540965	0.701839	normal	0.00737066	0.886373	up	0.00453455	0.898632	up	0.580414	0.253645	normal	0.213647	0.615911	normal
Panicum_miliaceum_newGene_15015	--	--	--	--	--	--	--	--	--	--	--	--	1.44084e-10	3.94442	up
Panicum_miliaceum_newGene_15030	0.43652	-0.370438	normal	0.441106	-0.317325	normal	0.161139	0.523249	normal	1.1475e-05	1.85304	up	0.961065	-0.0345947	normal
Panicum_miliaceum_newGene_1505	0.0895846	-0.839456	normal	0.0234403	-1.10781	normal	0.533628	-0.393261	normal	0.401249	0.362235	normal	2.78567e-21	2.61152	up
Panicum_miliaceum_newGene_15070	1.71674e-06	2.44414	up	1.89364e-13	3.32608	up	2.92323e-26	4.03083	up	1.27794e-08	3.41727	up	0.0218875	1.8563	normal
Panicum_miliaceum_newGene_15071	2.02385e-06	2.15691	up	5.97322e-16	3.04075	up	4.77263e-31	3.77867	up	4.40941e-13	3.19873	up	0.062918	1.48543	normal
Panicum_miliaceum_newGene_15086	1.13121e-05	2.33378	up	5.03003e-13	3.30906	up	3.77755e-25	3.95036	up	1.83986e-10	3.29818	up	--	--	--
Panicum_miliaceum_newGene_1509	1.14976e-06	0.743298	up	2.70423e-11	0.908568	up	8.74061e-19	1.13328	up	0.00221398	0.632915	up	0.0020491	0.61332	up
Panicum_miliaceum_newGene_15092	0.044262	1.51384	normal	0.000222508	2.33056	up	9.51606e-15	3.78137	up	2.51098e-05	2.84946	up	--	--	--
Panicum_miliaceum_newGene_15118	0.0142039	0.529845	normal	0.000577831	0.707442	up	1.66612e-09	1.20866	up	2.89139e-05	1.0313	up	0.0137109	0.830903	normal
Panicum_miliaceum_newGene_15124	7.67375e-12	2.37261	up	2.67627e-31	3.35939	up	1.25107e-41	4.04566	up	3.53797e-18	3.28619	up	0.000804865	1.91469	up
Panicum_miliaceum_newGene_15137	--	--	--	--	--	--	--	--	--	4.54104e-07	2.92157	up	--	--	--
Panicum_miliaceum_newGene_15142	--	--	--	7.91862e-07	2.94247	up	9.62757e-12	3.64322	up	--	--	--	--	--	--
Panicum_miliaceum_newGene_15143	--	--	--	1.17946e-10	3.01598	up	1.33813e-20	3.83271	up	8.13896e-10	3.45807	up	--	--	--
Panicum_miliaceum_newGene_15144	1.02613e-06	2.44749	up	1.69944e-09	3.2846	up	1.3589e-26	3.97555	up	2.77407e-07	3.38088	up	0.077144	1.43697	normal
Panicum_miliaceum_newGene_15146	--	--	--	1.97826e-09	2.99806	up	1.64044e-17	3.77819	up	3.7197e-07	3.00723	up	--	--	--
Panicum_miliaceum_newGene_15149	--	--	--	--	--	--	9.72773e-10	3.70575	up	--	--	--	--	--	--
Panicum_miliaceum_newGene_15191	--	--	--	--	--	--	1.71988e-06	2.45522	up	0.104104	1.22248	normal	0.161667	1.33893	normal
Panicum_miliaceum_newGene_15203	9.01628e-08	2.40963	up	2.79414e-13	3.22697	up	7.40875e-29	3.97699	up	8.74054e-08	2.9184	up	0.0140663	1.7915	normal
Panicum_miliaceum_newGene_15209	--	--	--	0.000274069	1.90869	up	--	--	--	--	--	--	--	--	--
Panicum_miliaceum_newGene_15229	0.000124255	2.39753	up	--	--	--	5.27494e-08	3.1403	up	--	--	--	--	--	--
Panicum_miliaceum_newGene_15245	0.0300244	0.885409	normal	8.03394e-09	1.72136	up	5.21209e-09	1.69154	up	0.399762	0.389881	normal	0.83521	0.19829	normal
Panicum_miliaceum_newGene_15258	--	--	--	1.01471e-10	3.83556	up	2.18821e-20	4.52621	up	2.10973e-08	3.60184	up	--	--	--
Panicum_miliaceum_newGene_15259	--	--	--	1.42034e-06	2.75304	up	3.27117e-14	3.95752	up	--	--	--	--	--	--
Panicum_miliaceum_newGene_15266	5.0295e-08	1.29852	up	3.89773e-12	1.5837	up	2.48735e-18	1.91928	up	6.7862e-10	1.38974	up	0.173757	0.555226	normal
Panicum_miliaceum_newGene_15268	7.70608e-05	2.2804	up	2.97011e-12	3.29178	up	3.5024e-21	3.97575	up	5.11705e-08	3.21916	up	--	--	--
Panicum_miliaceum_newGene_15276	--	--	--	1.62267e-10	3.22733	up	3.95546e-20	3.96546	up	3.49145e-09	3.25588	up	--	--	--
Panicum_miliaceum_newGene_15277	--	--	--	8.36749e-10	3.46684	up	1.4984e-15	4.11445	up	--	--	--	--	--	--
Panicum_miliaceum_newGene_15285	0.00128725	1.01834	up	2.09166e-06	1.30342	up	3.01287e-10	1.62714	up	0.00266833	0.907932	up	0.728033	-0.218844	normal
Panicum_miliaceum_newGene_15288	--	--	--	1.58327e-07	3.2219	up	3.46785e-10	3.62054	up	3.24719e-09	3.61555	up	--	--	--
Panicum_miliaceum_newGene_15289	--	--	--	--	--	--	2.25365e-11	4.20453	up	--	--	--	--	--	--
Panicum_miliaceum_newGene_15290	4.86152e-08	1.89071	up	5.25635e-18	2.94917	up	5.48343e-38	3.55647	up	1.23362e-12	2.96837	up	0.0380743	1.11859	normal
Panicum_miliaceum_newGene_15294	--	--	--	8.08302e-09	3.37396	up	2.00223e-14	3.88141	up	--	--	--	--	--	--
Panicum_miliaceum_newGene_15301	0.60846	0.283946	normal	0.258667	0.7079	normal	0.00867005	0.973745	up	0.0139359	1.44563	normal	0.555657	0.523093	normal
Panicum_miliaceum_newGene_15348	0.0124164	-0.957534	normal	0.0732927	-0.681861	normal	0.0330651	-0.889513	normal	0.0013538	-1.27486	down	1.41071e-05	1.37758	up
Panicum_miliaceum_newGene_15350	1.59574e-05	-0.934305	down	9.96439e-14	-1.09913	down	3.07973e-07	-1.11251	down	3.25934e-06	-0.824623	down	3.54014e-44	2.26903	up
Panicum_miliaceum_newGene_15357	4.40974e-12	1.5825	up	1.20601e-18	1.74613	up	1.54093e-20	1.68002	up	0.0202379	0.639426	normal	0.0332135	0.660945	normal
Panicum_miliaceum_newGene_15362	0.5602	0.433712	normal	0.0029901	1.11909	up	0.0224725	0.896368	normal	3.00967e-09	1.94535	up	0.611185	-0.445989	normal
Panicum_miliaceum_newGene_15384	0.657221	0.112925	normal	0.759127	0.0981539	normal	0.0166146	0.437165	normal	0.0210487	0.451594	normal	0.000571842	0.59888	up
Panicum_miliaceum_newGene_15411	0.699487	-0.0891252	normal	0.278494	-0.256599	normal	0.150262	-0.26311	normal	0.19192	0.237277	normal	4.03932e-09	1.5808	up
Panicum_miliaceum_newGene_15414	0.0603418	0.369394	normal	1.03192e-07	0.743056	up	4.04937e-12	1.10003	up	7.13126e-13	1.20821	up	0.00763104	0.790275	up
Panicum_miliaceum_newGene_15431	2.34768e-22	1.55757	up	6.92938e-34	1.80085	up	5.83159e-19	1.95259	up	0.040841	0.733667	normal	0.59736	0.169613	normal
Panicum_miliaceum_newGene_1544	0.0989591	0.335298	normal	0.483788	0.238395	normal	0.00839101	0.515605	normal	0.00432076	0.604149	up	0.339741	0.421052	normal
Panicum_miliaceum_newGene_15447	0.177387	0.306123	normal	0.015863	0.377537	normal	0.00494354	0.715399	up	0.0928842	0.436464	normal	0.0637992	0.425486	normal
Panicum_miliaceum_newGene_15466	0.111625	0.391885	normal	0.0427084	0.579924	normal	0.000329365	0.782465	up	0.549621	0.239017	normal	0.409608	0.351204	normal
Panicum_miliaceum_newGene_15468	6.16751e-05	0.923159	up	1.65598e-08	1.45633	up	5.68018e-17	1.49606	up	0.00613055	0.658062	up	0.0505618	0.705861	normal
Panicum_miliaceum_newGene_1547	0.815122	-0.0535163	normal	0.117263	-0.317616	normal	0.325885	0.237083	normal	2.42847e-05	0.739772	up	0.0112085	0.448494	normal
Panicum_miliaceum_newGene_1548	9.44141e-11	2.62186	up	5.20867e-12	3.02948	up	1.78202e-12	2.88079	up	1.32807e-07	2.88104	up	--	--	--
Panicum_miliaceum_newGene_15481	8.52513e-05	0.789854	up	6.80273e-10	1.54738	up	9.06347e-28	2.13215	up	8.94993e-28	2.50459	up	0.662768	0.180165	normal
Panicum_miliaceum_newGene_15507	0.792624	-0.0861182	normal	0.905553	0.0422893	normal	6.39815e-05	0.807903	up	1.45982e-05	1.0561	up	0.978846	0.0128326	normal
Panicum_miliaceum_newGene_15520	3.34037e-05	0.671237	up	2.10675e-10	1.03099	up	1.28479e-06	1.1503	up	0.00232114	0.605194	up	0.0863466	-0.477677	normal
Panicum_miliaceum_newGene_15523	7.01657e-05	1.17882	up	6.06154e-07	1.99495	up	3.11484e-05	1.37924	up	0.467905	-0.42973	normal	0.174922	0.670236	normal
Panicum_miliaceum_newGene_1553	0.000581785	2.50107	up	3.71338e-12	3.11332	up	2.52526e-17	3.5266	up	9.02783e-09	2.81062	up	0.0613418	1.34661	normal
Panicum_miliaceum_newGene_15539	0.00972858	0.653528	up	9.47398e-05	0.999537	up	2.67954e-08	1.36817	up	1.00141e-05	1.14172	up	0.306522	-0.41119	normal
Panicum_miliaceum_newGene_15540	0.153649	0.37024	normal	0.140378	0.32725	normal	0.00290564	0.596383	up	0.000752684	0.878553	up	5.56e-08	2.20664	up
Panicum_miliaceum_newGene_15547	2.52636e-12	3.81337	up	1.82412e-10	3.84798	up	6.86221e-18	4.4302	up	1.59034e-10	3.76686	up	0.482669	1.14423	normal
Panicum_miliaceum_newGene_15551	2.16424e-28	3.38861	up	1.13816e-15	3.28709	up	9.92761e-28	4.13661	up	1.38013e-31	3.00095	up	0.891575	0.224853	normal
Panicum_miliaceum_newGene_15560	0.184601	0.426631	normal	0.000525552	1.01325	up	0.00377006	0.88305	up	0.0706832	0.639739	normal	0.555441	-0.716682	normal
Panicum_miliaceum_newGene_15566	--	--	--	--	--	--	3.84355e-12	4.61573	up	1.25781e-09	4.32246	up	--	--	--
Panicum_miliaceum_newGene_1557	2.05686e-08	1.84827	up	6.00758e-08	1.81855	up	5.6179e-10	2.04211	up	0.118039	0.594682	normal	4.44991e-05	1.74533	up
Panicum_miliaceum_newGene_15572	0.153959	0.578028	normal	0.0011201	1.21375	up	0.0632281	0.680922	normal	0.00581389	1.0087	up	0.600822	-0.649289	normal
Panicum_miliaceum_newGene_15598	--	--	--	--	--	--	--	--	--	--	--	--	0.000829214	3.08454	up
Panicum_miliaceum_newGene_15619	--	--	--	--	--	--	--	--	--	--	--	--	0.0044169	1.60749	up
Panicum_miliaceum_newGene_15621	0.909597	0.0430112	normal	0.360697	0.285563	normal	0.00595485	0.906739	up	0.0228471	0.790054	normal	0.0253759	0.879381	normal
Panicum_miliaceum_newGene_15627	1.77882e-27	2.4391	up	1.71719e-27	2.70827	up	1.01202e-39	2.64972	up	1.22951e-06	1.46923	up	5.74205e-07	1.86085	up
Panicum_miliaceum_newGene_15629	--	--	--	8.27061e-18	4.37757	up	3.51892e-41	5.34881	up	1.07671e-18	5.02126	up	--	--	--
Panicum_miliaceum_newGene_15646	--	--	--	--	--	--	--	--	--	--	--	--	0.00403514	1.81729	up
Panicum_miliaceum_newGene_15649	0.418593	0.537633	normal	0.0265727	3.78859	normal	1.61107e-18	2.74144	up	5.83728e-08	2.93166	up	0.762554	-0.732889	normal
Panicum_miliaceum_newGene_15650	--	--	--	--	--	--	--	--	--	--	--	--	3.38794e-09	8.58472	up
Panicum_miliaceum_newGene_15657	0.00154771	1.33371	up	0.0120552	3.14941	normal	1.09251e-18	2.82445	up	9.17023e-11	3.07137	up	0.653802	1.44219	normal
Panicum_miliaceum_newGene_15669	0.00675327	-0.758296	down	0.257382	-0.326384	normal	0.99277	0.00354365	normal	0.00421605	0.642816	up	0.253557	0.315733	normal
Panicum_miliaceum_newGene_15672	--	--	--	--	--	--	--	--	--	2.44187e-10	8.49244	up	--	--	--
Panicum_miliaceum_newGene_15676	5.98478e-06	1.23975	up	6.05878e-14	2.14199	up	1.05135e-25	3.00608	up	3.74139e-18	2.84508	up	0.528727	0.346513	normal
Panicum_miliaceum_newGene_15690	0.617469	0.103353	normal	0.000992786	0.441858	normal	2.59089e-16	1.1821	up	3.13997e-11	1.81892	up	0.31998	-1.23075	normal
Panicum_miliaceum_newGene_15698	--	--	--	--	--	--	--	--	--	0.000401282	2.3116	up	--	--	--
Panicum_miliaceum_newGene_15712	--	--	--	--	--	--	0.00856056	1.50258	up	0.0980407	1.04257	normal	0.176983	1.25827	normal
Panicum_miliaceum_newGene_15713	4.60596e-18	1.34974	up	3.69321e-33	1.87285	up	5.98502e-70	2.22343	up	1.43739e-12	1.76669	up	0.0793174	0.562171	normal
Panicum_miliaceum_newGene_15742	9.0852e-18	1.94476	up	8.74462e-10	1.72169	up	9.24579e-32	2.55797	up	7.32544e-20	2.344	up	4.95998e-13	-2.77359	down
Panicum_miliaceum_newGene_15744	0.440541	-0.208953	normal	0.790626	0.0741329	normal	0.00613256	0.582014	normal	1.08902e-06	0.99962	up	0.000453107	0.90157	up
Panicum_miliaceum_newGene_15747	0.0446861	1.02948	normal	5.09386e-05	1.81133	up	1.30923e-12	2.73977	up	4.58451e-10	2.9128	up	0.869699	0.163924	normal
Panicum_miliaceum_newGene_15755	3.99447e-14	2.17467	up	4.16263e-21	2.55431	up	1.06229e-23	2.81708	up	3.07757e-07	1.85927	up	0.580203	0.367748	normal
Panicum_miliaceum_newGene_15785	--	--	--	--	--	--	--	--	--	2.22442e-05	3.76605	up	--	--	--
Panicum_miliaceum_newGene_15798	4.84063e-06	0.936213	up	1.90746e-10	1.24335	up	3.34892e-14	1.3903	up	0.000146273	0.897297	up	0.499745	0.250155	normal
Panicum_miliaceum_newGene_15799	2.1071e-08	1.55143	up	1.57508e-10	1.81906	up	1.40147e-07	1.60872	up	0.000120726	1.266	up	0.173806	-0.959143	normal
Panicum_miliaceum_newGene_1580	4.2611e-06	1.26018	up	5.1967e-11	1.91612	up	1.81304e-18	2.03958	up	0.00107717	1.18296	up	0.157369	0.637515	normal
Panicum_miliaceum_newGene_15810	0.684137	-0.12777	normal	0.941342	-0.0255853	normal	0.00761751	0.562831	normal	0.44404	0.229553	normal	0.00252041	0.838513	up
Panicum_miliaceum_newGene_15837	0.0760674	-0.915827	normal	0.90833	-0.0606922	normal	0.451719	0.315203	normal	0.0538794	0.838985	normal	0.00010042	1.83592	up
Panicum_miliaceum_newGene_15848	1.96852e-05	1.7165	up	--	--	--	4.28369e-07	2.40926	up	5.08975e-05	2.08881	up	--	--	--
Panicum_miliaceum_newGene_15868	0.0085678	0.420707	normal	3.45547e-09	1.24579	up	4.62996e-35	1.89177	up	2.6331e-06	1.72494	up	0.0194181	0.69379	normal
Panicum_miliaceum_newGene_15879	0.126352	0.636293	normal	0.000165643	1.08597	up	3.79363e-09	1.37003	up	1.1704e-06	1.17856	up	0.934658	-0.0491349	normal
Panicum_miliaceum_newGene_15887	0.0338765	0.543276	normal	0.00607934	0.779642	up	0.00111627	0.757777	up	3.66362e-05	0.966347	up	0.0718725	0.617621	normal
Panicum_miliaceum_newGene_15888	0.266907	0.429154	normal	0.00348736	0.910498	up	6.43396e-09	1.53153	up	3.09296e-12	2.50519	up	1.443e-18	3.23635	up
Panicum_miliaceum_newGene_15892	0.15747	1.06665	normal	--	--	--	0.0256581	1.41257	normal	0.000270794	2.11435	up	--	--	--
Panicum_miliaceum_newGene_15900	0.000753044	0.658459	up	1.81409e-15	1.35651	up	2.81388e-21	1.67545	up	1.31995e-07	1.45064	up	0.0102107	1.05799	normal
Panicum_miliaceum_newGene_1591	0.00463994	1.63139	up	0.00192677	1.86555	up	0.000247451	1.92926	up	0.0197718	1.43726	normal	0.267301	0.969407	normal
Panicum_miliaceum_newGene_15915	1.19391e-12	2.05542	up	9.71062e-12	2.11919	up	3.84004e-05	1.73759	up	0.187206	0.600455	normal	0.159315	-1.98901	normal
Panicum_miliaceum_newGene_15916	9.68644e-17	3.16437	up	1.28706e-31	4.14369	up	1.30892e-40	4.48827	up	1.42834e-12	3.87081	up	--	--	--
Panicum_miliaceum_newGene_15923	0.000174989	2.0488	up	5.98583e-10	2.80034	up	1.34447e-22	3.94425	up	1.62782e-23	4.79943	up	4.95978e-17	4.33556	up
Panicum_miliaceum_newGene_15924	0.449645	0.283038	normal	0.055528	0.64455	normal	4.48175e-06	1.23053	up	1.08944e-08	2.09822	up	5.89612e-09	2.36922	up
Panicum_miliaceum_newGene_15933	0.798068	0.0869839	normal	0.0027345	0.597494	up	3.23281e-13	1.40609	up	1.6872e-10	1.77313	up	0.0286727	0.707023	normal
Panicum_miliaceum_newGene_15937	--	--	--	0.00758817	1.50561	up	--	--	--	5.40957e-05	1.84141	up	0.00794446	1.5418	up
Panicum_miliaceum_newGene_15971	0.0614945	1.21566	normal	0.294041	0.770062	normal	0.154906	0.947454	normal	0.00193367	1.98062	up	0.30508	-1.51912	normal
Panicum_miliaceum_newGene_15979	0.730676	0.188375	normal	0.404551	0.402461	normal	0.0314456	0.759328	normal	0.000891291	1.15033	up	0.867511	-0.116121	normal
Panicum_miliaceum_newGene_15990	0.0202766	0.427422	normal	0.130545	0.311012	normal	0.0301387	-0.556038	normal	2.56297e-11	-1.4323	down	4.33139e-05	0.97194	up
Panicum_miliaceum_newGene_1601	0.0072442	0.868191	up	4.49813e-05	1.46741	up	3.12422e-08	1.6101	up	8.62307e-06	1.55374	up	0.319301	0.413526	normal
Panicum_miliaceum_newGene_16020	0.157507	0.889824	normal	9.77339e-09	2.57462	up	1.88089e-13	3.07263	up	1.05059e-10	3.19052	up	0.0228176	-3.95367	normal
Panicum_miliaceum_newGene_16022	0.000541329	1.41074	up	5.18191e-20	2.9239	up	2.54925e-23	3.29013	up	1.20809e-15	3.66686	up	6.27823e-07	-5.9383	down
Panicum_miliaceum_newGene_16035	--	--	--	--	--	--	1.13184e-12	3.78966	up	2.18618e-10	3.58956	up	--	--	--
Panicum_miliaceum_newGene_16045	0.211943	-0.542957	normal	0.184623	-0.602163	normal	0.749081	-0.131016	normal	0.520589	-0.298931	normal	0.00168157	1.0556	up
Panicum_miliaceum_newGene_1606	0.0443478	0.568572	normal	0.000638629	0.955838	up	0.0210058	0.684013	normal	0.0517999	0.743214	normal	0.140945	-1.20823	normal
Panicum_miliaceum_newGene_16063	0.1547	-0.259338	normal	0.992307	0.00239773	normal	6.99848e-11	0.8776	up	0.000435504	0.998635	up	0.0653458	0.469958	normal
Panicum_miliaceum_newGene_16078	--	--	--	1.1092e-12	3.53118	up	--	--	--	1.50993e-06	3.34283	up	--	--	--
Panicum_miliaceum_newGene_16090	--	--	--	0.000444111	2.0899	up	--	--	--	9.6581e-06	2.36607	up	0.0979398	1.48648	normal
Panicum_miliaceum_newGene_16100	0.841704	0.0596099	normal	0.0159106	0.494004	normal	8.32858e-07	0.935831	up	5.14632e-08	1.45231	up	0.682748	0.154436	normal
Panicum_miliaceum_newGene_16104	--	--	--	--	--	--	3.69304e-10	3.39072	up	--	--	--	--	--	--
Panicum_miliaceum_newGene_16105	--	--	--	--	--	--	2.70912e-09	3.34178	up	--	--	--	--	--	--
Panicum_miliaceum_newGene_16108	--	--	--	--	--	--	--	--	--	--	--	--	3.01068e-05	2.88093	up
Panicum_miliaceum_newGene_16115	0.159654	0.684085	normal	0.0868725	0.733188	normal	0.0792799	0.827341	normal	0.00820216	1.01199	up	0.419357	-0.572938	normal
Panicum_miliaceum_newGene_16169	0.196241	0.36611	normal	0.0184203	0.852224	normal	0.00423887	0.825742	up	0.00273171	0.906761	up	0.557881	0.342697	normal
Panicum_miliaceum_newGene_16189	0.00929326	0.850244	up	0.114291	0.512745	normal	7.13558e-05	0.938665	up	0.754213	-0.101591	normal	0.46737	0.569495	normal
Panicum_miliaceum_newGene_16191	0.097374	1.14771	normal	0.00011781	2.24163	up	0.00838972	1.62636	up	--	--	--	0.0902773	2.0277	normal
Panicum_miliaceum_newGene_16197	--	--	--	--	--	--	--	--	--	--	--	--	0.00805269	4.45899	up
Panicum_miliaceum_newGene_1622	0.733845	0.0738893	normal	0.208521	-0.26125	normal	0.0226652	-0.385256	normal	0.290214	0.195684	normal	0.0010053	0.706479	up
Panicum_miliaceum_newGene_16234	2.95828e-05	0.989781	up	5.72275e-06	1.45698	up	1.74815e-16	1.7857	up	3.44374e-24	2.47532	up	0.042551	0.943692	normal
Panicum_miliaceum_newGene_16258	5.05661e-07	2.52221	up	8.14845e-15	3.61722	up	6.60994e-28	4.16693	up	7.06438e-10	3.46499	up	--	--	--
Panicum_miliaceum_newGene_16259	5.0664e-06	2.27626	up	3.14009e-13	3.20688	up	1.20483e-23	3.86894	up	4.20712e-08	3.24376	up	--	--	--
Panicum_miliaceum_newGene_1627	0.938004	0.0354408	normal	0.990998	-0.00543542	normal	0.00138884	0.970884	up	0.0238607	0.972729	normal	0.0649416	0.590064	normal
Panicum_miliaceum_newGene_16273	3.09024e-07	2.24632	up	6.20744e-17	3.22465	up	1.42091e-27	3.79233	up	2.86671e-10	3.13211	up	--	--	--
Panicum_miliaceum_newGene_16274	5.25771e-06	2.09346	up	5.10668e-14	3.22893	up	2.48983e-25	3.73022	up	2.39011e-08	3.213	up	--	--	--
Panicum_miliaceum_newGene_16282	2.2338e-05	2.31873	up	1.06981e-18	3.58865	up	3.79615e-25	4.00753	up	1.68855e-09	3.31444	up	--	--	--
Panicum_miliaceum_newGene_16283	7.02216e-08	1.93526	up	7.46487e-23	3.00278	up	8.73393e-51	3.7787	up	2.57187e-13	3.1012	up	0.0112007	1.36503	normal
Panicum_miliaceum_newGene_16284	--	--	--	--	--	--	9.75602e-11	4.05233	up	--	--	--	--	--	--
Panicum_miliaceum_newGene_16285	--	--	--	6.32383e-09	2.84804	up	8.0536e-21	3.70341	up	1.45262e-07	2.91165	up	--	--	--
Panicum_miliaceum_newGene_16292	--	--	--	--	--	--	2.01711e-08	4.2237	up	--	--	--	--	--	--
Panicum_miliaceum_newGene_16293	--	--	--	2.9343e-10	3.23883	up	4.30269e-19	3.92471	up	1.5046e-07	3.2173	up	--	--	--
Panicum_miliaceum_newGene_16307	--	--	--	--	--	--	--	--	--	0.00067065	4.06346	up	--	--	--
Panicum_miliaceum_newGene_1632	0.0014857	0.529434	normal	9.21959e-07	0.783556	up	3.10523e-06	0.851654	up	0.0108806	0.642906	normal	0.920523	0.0316474	normal
Panicum_miliaceum_newGene_16320	1.03125e-06	0.866675	up	9.04949e-13	1.3289	up	1.12355e-30	1.90115	up	2.91182e-11	1.67636	up	0.00967125	0.883225	up
Panicum_miliaceum_newGene_16323	--	--	--	--	--	--	9.71486e-11	3.69696	up	--	--	--	--	--	--
Panicum_miliaceum_newGene_1633	--	--	--	--	--	--	--	--	--	1.23115e-08	4.18621	up	--	--	--
Panicum_miliaceum_newGene_16339	0.574846	-0.331434	normal	0.950729	0.0511969	normal	0.175202	0.617117	normal	0.00294081	1.0969	up	0.672036	0.39256	normal
Panicum_miliaceum_newGene_1634	0.0946645	-0.388033	normal	0.776092	-0.078198	normal	2.76635e-05	0.776693	up	5.4092e-05	1.24823	up	0.264139	-0.421789	normal
Panicum_miliaceum_newGene_16370	0.0899891	-0.503776	normal	0.00784442	-0.859062	down	0.0570487	-0.550064	normal	0.995561	-0.00210766	normal	0.00035535	1.13357	up
Panicum_miliaceum_newGene_16372	0.971987	-0.0179459	normal	0.0839744	0.405838	normal	8.57407e-05	0.828618	up	0.00651608	0.749347	up	0.887128	-0.079345	normal
Panicum_miliaceum_newGene_16373	0.033894	0.422624	normal	0.0352516	0.516321	normal	0.000317355	0.650033	up	0.0700394	0.437585	normal	0.670491	-0.241571	normal
Panicum_miliaceum_newGene_16392	0.248014	0.539871	normal	0.00477545	1.15007	up	4.00686e-05	1.46836	up	0.000886728	1.5583	up	0.65974	0.333477	normal
Panicum_miliaceum_newGene_16394	--	--	--	0.00162972	1.96274	up	0.000248831	2.14907	up	--	--	--	--	--	--
Panicum_miliaceum_newGene_16428	0.928767	0.0313949	normal	0.0385294	0.513006	normal	9.03408e-06	0.943556	up	7.34568e-07	1.43983	up	0.103601	-0.527234	normal
Panicum_miliaceum_newGene_16438	0.933097	0.0305271	normal	0.0163381	0.502053	normal	3.62935e-06	0.954949	up	0.0104263	0.948649	normal	0.528562	0.285991	normal
Panicum_miliaceum_newGene_16446	--	--	--	--	--	--	0.254252	0.757004	normal	3.18447e-12	2.61932	up	0.251428	0.943632	normal
Panicum_miliaceum_newGene_16468	--	--	--	--	--	--	--	--	--	--	--	--	0.00252885	2.08241	up
Panicum_miliaceum_newGene_16483	0.115896	-0.454846	normal	0.000355516	-0.894739	down	0.00451498	-0.775584	down	0.957798	-0.0138865	normal	0.00374736	0.880625	up
Panicum_miliaceum_newGene_1650	0.313545	0.36983	normal	0.0123934	0.754211	normal	0.00390721	0.769812	up	0.00217593	0.974714	up	0.0648418	-1.29649	normal
Panicum_miliaceum_newGene_16500	0.00104921	1.0438	up	0.00028892	1.04847	up	2.51144e-06	1.13447	up	1.54856e-07	1.58117	up	0.036312	0.827406	normal
Panicum_miliaceum_newGene_16503	8.18158e-10	1.06128	up	5.46098e-16	1.46087	up	1.79237e-17	1.66622	up	6.07315e-24	1.888	up	0.169707	0.654041	normal
Panicum_miliaceum_newGene_1652	2.79045e-10	2.42195	up	3.39891e-15	3.33426	up	2.46165e-49	4.52765	up	4.8638e-20	4.53648	up	--	--	--
Panicum_miliaceum_newGene_16531	0.00641634	1.34757	up	0.000167177	1.74798	up	0.000112285	1.81467	up	4.18976e-07	2.14635	up	0.328687	-1.5951	normal
Panicum_miliaceum_newGene_16541	0.296211	0.581533	normal	0.119377	0.726965	normal	0.000347945	1.35092	up	0.000123614	1.55595	up	5.15339e-10	2.50371	up
Panicum_miliaceum_newGene_16555	0.45716	0.260255	normal	0.00276001	0.7696	up	2.82611e-06	1.15076	up	0.000868343	0.793552	up	0.676467	-0.532319	normal
Panicum_miliaceum_newGene_16588	0.698531	-0.158398	normal	0.00415658	0.838459	up	3.22142e-12	1.63867	up	1.06203e-05	1.78782	up	0.571422	-0.272612	normal
Panicum_miliaceum_newGene_1659	3.90904e-30	1.8335	up	2.47787e-52	2.36237	up	1.34093e-50	2.73188	up	9.76692e-14	2.02948	up	0.932259	0.0431719	normal
Panicum_miliaceum_newGene_16590	0.0139864	1.34367	normal	0.000349988	1.79591	up	0.00371834	1.65186	up	0.288478	0.878934	normal	--	--	--
Panicum_miliaceum_newGene_16601	0.168714	0.280828	normal	0.647071	0.110775	normal	0.000111525	0.758082	up	1.07287e-05	1.14769	up	0.103207	0.603634	normal
Panicum_miliaceum_newGene_16613	--	--	--	--	--	--	--	--	--	--	--	--	4.21201e-07	3.45734	up
Panicum_miliaceum_newGene_16628	0.00199812	1.58427	up	0.321666	0.693394	normal	0.0107466	1.5507	normal	0.000755701	1.13248	up	0.364304	0.676369	normal
Panicum_miliaceum_newGene_16649	0.00107763	1.81315	up	--	--	--	--	--	--	--	--	--	0.0464639	1.76708	normal
Panicum_miliaceum_newGene_16670	0.941345	-0.0233603	normal	0.638296	-0.113865	normal	0.00943037	0.534851	normal	4.14878e-10	0.930264	up	0.100846	0.449062	normal
Panicum_miliaceum_newGene_16683	0.496635	0.229043	normal	0.18768	0.398997	normal	0.00166688	0.991392	up	0.307531	0.380083	normal	0.516067	-0.400285	normal
Panicum_miliaceum_newGene_167	0.338482	0.60484	normal	0.0027539	1.54352	up	0.0256575	1.28805	normal	0.000227929	1.79527	up	0.0550788	1.60168	normal
Panicum_miliaceum_newGene_1670	3.35985e-06	1.96394	up	3.46661e-16	3.17321	up	9.81505e-25	3.49513	up	6.69229e-16	3.52561	up	--	--	--
Panicum_miliaceum_newGene_16701	0.0337433	-0.393899	normal	0.984649	0.00468822	normal	0.0381207	0.418187	normal	0.00249633	0.691868	up	0.284535	0.451283	normal
Panicum_miliaceum_newGene_16734	--	--	--	4.5919e-12	3.00536	up	3.46107e-21	3.60881	up	1.72039e-18	3.56003	up	0.00208098	2.46759	up
Panicum_miliaceum_newGene_16747	0.019596	0.73709	normal	0.00123513	1.11033	up	8.95031e-08	1.68143	up	0.357994	0.416718	normal	0.866311	0.0908757	normal
Panicum_miliaceum_newGene_16756	0.112998	0.568897	normal	0.0935306	0.639635	normal	0.0473508	0.714763	normal	0.0198028	0.908262	normal	1.21676e-23	4.09233	up
Panicum_miliaceum_newGene_16759	0.0197654	1.28424	normal	--	--	--	3.59918e-06	1.96466	up	2.21874e-08	2.32791	up	--	--	--
Panicum_miliaceum_newGene_16781	2.01483e-28	1.62235	up	5.8629e-58	2.60647	up	2.91093e-114	2.93206	up	5.09386e-15	1.85015	up	0.422222	0.276922	normal
Panicum_miliaceum_newGene_16795	--	--	--	--	--	--	--	--	--	3.95328e-06	4.21562	up	--	--	--
Panicum_miliaceum_newGene_1680	7.79203e-14	1.44304	up	1.04096e-30	2.14748	up	8.18016e-62	2.38279	up	2.50914e-26	2.44745	up	1.35764e-10	1.56996	up
Panicum_miliaceum_newGene_16818	0.0154637	0.520101	normal	4.45988e-07	1.00123	up	1.48635e-17	1.64326	up	6.4489e-06	1.76059	up	0.897218	0.068267	normal
Panicum_miliaceum_newGene_16821	0.223518	0.336869	normal	0.187152	0.368824	normal	0.00298491	0.675139	up	0.179495	0.411386	normal	0.985374	-0.013273	normal
Panicum_miliaceum_newGene_16825	0.489526	0.209718	normal	4.16353e-08	1.00748	up	6.04952e-11	1.71028	up	1.16153e-08	1.95458	up	0.562676	0.27482	normal
Panicum_miliaceum_newGene_16828	0.195735	0.400413	normal	0.0381477	0.632421	normal	2.42538e-06	1.1719	up	4.02991e-06	1.14796	up	0.31757	0.526583	normal
Panicum_miliaceum_newGene_1683	0.0166081	1.04073	normal	0.768479	-0.143973	normal	0.01919	0.750991	normal	9.18273e-05	1.89113	up	0.295813	-0.830244	normal
Panicum_miliaceum_newGene_16836	0.0169099	0.935702	normal	0.111918	0.690647	normal	0.00952994	0.984322	up	0.384335	0.412245	normal	0.00976612	1.50231	up
Panicum_miliaceum_newGene_16845	0.782592	-0.130229	normal	0.195612	0.47326	normal	0.0519642	0.777985	normal	0.000125907	1.37101	up	0.12517	-0.631047	normal
Panicum_miliaceum_newGene_16860	0.850143	0.0427559	normal	0.276032	0.186083	normal	0.000344862	0.649861	up	2.14843e-10	1.01851	up	0.39434	0.295938	normal
Panicum_miliaceum_newGene_16865	--	--	--	--	--	--	--	--	--	--	--	--	0.00758499	1.79254	up
Panicum_miliaceum_newGene_16868	0.164128	1.01257	normal	0.00332995	1.44904	up	3.69763e-13	2.72019	up	1.04407e-12	2.99482	up	0.223651	1.23046	normal
Panicum_miliaceum_newGene_16905	1.19901e-31	1.93687	up	8.98626e-34	2.02506	up	8.35359e-46	2.32033	up	1.98734e-07	1.64302	up	0.0342664	0.902758	normal
Panicum_miliaceum_newGene_16913	0.00248844	0.357762	normal	0.00436158	0.530076	normal	1.02028e-09	0.796908	up	0.00249417	0.548799	normal	0.0988839	-0.637272	normal
Panicum_miliaceum_newGene_16955	0.448576	-0.286331	normal	0.298115	-0.354683	normal	0.864747	0.0539567	normal	0.00394885	0.722157	up	0.958698	-0.025626	normal
Panicum_miliaceum_newGene_16964	0.0280411	0.330987	normal	0.00675138	0.488055	normal	4.76916e-09	0.760052	up	0.00996611	0.466788	normal	0.0133184	-1.01618	normal
Panicum_miliaceum_newGene_16965	0.0230188	0.359212	normal	0.029081	0.536707	normal	2.06145e-05	0.851177	up	0.00524549	0.733563	up	0.958659	0.0414498	normal
Panicum_miliaceum_newGene_16967	0.00201123	0.418649	normal	8.52478e-05	0.568831	normal	1.0934e-09	0.817116	up	0.0394779	0.423844	normal	0.167883	-0.498188	normal
Panicum_miliaceum_newGene_16978	--	--	--	--	--	--	2.66409e-07	2.52316	up	--	--	--	--	--	--
Panicum_miliaceum_newGene_1698	0.683388	-0.152074	normal	0.0915895	0.44986	normal	0.00448469	0.633593	up	0.00819083	0.696275	up	0.869457	0.0700991	normal
Panicum_miliaceum_newGene_16981	4.61815e-12	2.76505	up	3.70889e-16	3.22492	up	2.6021e-24	3.86106	up	1.48175e-23	4.50432	up	0.000103557	2.50591	up
Panicum_miliaceum_newGene_16982	8.29387e-09	2.72088	up	1.21501e-13	3.33816	up	3.69352e-22	3.90239	up	3.06651e-17	4.28098	up	0.10282	1.35182	normal
Panicum_miliaceum_newGene_16989	--	--	--	--	--	--	1.91508e-11	3.73833	up	--	--	--	--	--	--
Panicum_miliaceum_newGene_16991	--	--	--	5.32768e-07	3.09078	up	9.87564e-12	3.47065	up	7.81428e-06	2.94523	up	--	--	--
Panicum_miliaceum_newGene_16995	2.22194e-08	0.787052	up	0.0173625	0.883893	normal	0.950954	0.162871	normal	4.72742e-05	0.682154	up	0.0446738	-0.541947	normal
Panicum_miliaceum_newGene_16998	0.126338	0.445956	normal	0.00393761	0.771608	up	0.00664122	0.702984	up	0.0454376	0.434217	normal	0.307661	-0.499607	normal
Panicum_miliaceum_newGene_16999	0.000276154	0.407861	normal	3.11287e-05	0.589989	up	6.20203e-11	0.782019	up	0.00607418	0.469913	normal	0.139918	-0.478799	normal
Panicum_miliaceum_newGene_170	0.145323	0.624467	normal	0.000698308	1.2821	up	5.09415e-07	1.67988	up	0.274503	0.676398	normal	1.34911e-09	2.66665	up
Panicum_miliaceum_newGene_17000	0.00134285	0.353623	normal	0.000944569	0.49474	normal	1.70487e-08	0.731965	up	0.00665697	0.49853	normal	0.0781525	-0.635939	normal
Panicum_miliaceum_newGene_17001	0.00217686	0.395955	normal	0.00416495	0.525763	normal	1.14217e-09	0.811227	up	0.00408206	0.539589	normal	0.16855	-0.550397	normal
Panicum_miliaceum_newGene_17010	0.00221673	0.452518	normal	0.00305413	0.576711	normal	3.88094e-09	0.844789	up	0.00263226	0.548219	normal	0.202851	-0.532973	normal
Panicum_miliaceum_newGene_17012	--	--	--	--	--	--	4.55761e-07	3.66742	up	--	--	--	--	--	--
Panicum_miliaceum_newGene_17017	0.561036	0.406183	normal	1.38646e-05	1.69846	up	2.54911e-09	2.37972	up	2.13411e-19	2.80403	up	0.532933	0.440841	normal
Panicum_miliaceum_newGene_17018	--	--	--	--	--	--	1.22576e-11	4.5747	up	--	--	--	--	--	--
Panicum_miliaceum_newGene_17021	0.0770044	0.277516	normal	0.0180691	0.44964	normal	1.09101e-07	0.719839	up	0.00959051	0.475204	normal	0.0784858	-0.606587	normal
Panicum_miliaceum_newGene_17022	3.25119e-05	0.48713	normal	0.00307017	0.546736	normal	7.28319e-11	0.863655	up	0.00473246	0.557984	normal	0.185948	-0.562821	normal
Panicum_miliaceum_newGene_17024	0.00509183	0.46073	normal	0.0142012	0.505207	normal	2.36966e-08	0.898078	up	0.00247911	0.591848	up	0.210743	-0.534046	normal
Panicum_miliaceum_newGene_17025	0.0378599	0.309113	normal	0.00490084	0.516344	normal	6.21902e-06	0.682615	up	0.0746193	0.376176	normal	0.061694	-0.688568	normal
Panicum_miliaceum_newGene_17029	0.000501808	0.410893	normal	0.000523346	0.583594	normal	1.23957e-11	0.833976	up	0.00461396	0.550712	normal	0.16859	-0.502722	normal
Panicum_miliaceum_newGene_17030	0.00141161	0.366422	normal	0.0043127	0.516867	normal	8.05044e-09	0.78118	up	0.00576854	0.491878	normal	0.176424	-0.554546	normal
Panicum_miliaceum_newGene_17031	0.000730099	0.424589	normal	1.32969e-07	0.625002	up	7.63831e-12	0.799455	up	0.00178088	0.504687	normal	0.178483	-0.488688	normal
Panicum_miliaceum_newGene_17032	0.00381586	0.41519	normal	0.00194344	0.550639	normal	1.20844e-09	0.848197	up	0.00584555	0.58031	normal	0.086451	-0.613075	normal
Panicum_miliaceum_newGene_17038	0.00160281	0.344587	normal	9.06093e-05	0.541183	normal	9.00131e-10	0.754354	up	0.00822786	0.48604	normal	0.146072	-0.525229	normal
Panicum_miliaceum_newGene_17040	0.00194151	0.34511	normal	0.000136547	0.542454	normal	7.74653e-10	0.755335	up	0.00959931	0.468518	normal	0.161189	-0.514587	normal
Panicum_miliaceum_newGene_17043	--	--	--	--	--	--	4.14727e-11	4.09516	up	--	--	--	--	--	--
Panicum_miliaceum_newGene_17044	--	--	--	--	--	--	1.1039e-11	3.48089	up	--	--	--	--	--	--
Panicum_miliaceum_newGene_17045	0.0767756	0.25807	normal	0.00160315	0.47378	normal	5.23938e-07	0.646214	up	0.0374171	0.380269	normal	0.0630598	-0.601338	normal
Panicum_miliaceum_newGene_17046	0.102125	0.424076	normal	0.0265182	0.399458	normal	9.4974e-06	0.685334	up	0.0554747	0.458698	normal	0.0919106	-0.66594	normal
Panicum_miliaceum_newGene_17047	0.00618941	0.367777	normal	0.00536479	0.515902	normal	1.06737e-09	0.791259	up	0.00664902	0.509022	normal	0.184427	-0.548573	normal
Panicum_miliaceum_newGene_17048	0.122017	0.230417	normal	6.81197e-06	0.584257	normal	4.6794e-08	0.838133	up	0.00599167	0.597607	up	0.200448	-0.433273	normal
Panicum_miliaceum_newGene_17049	2.48911e-06	0.596667	up	0.00151027	0.608136	up	0.00171491	0.697706	up	0.00637798	0.576129	normal	0.43075	-0.468568	normal
Panicum_miliaceum_newGene_17050	0.0168708	0.318658	normal	0.0237971	0.437635	normal	5.81327e-05	0.686151	up	0.0356557	0.449544	normal	0.0795354	-0.598121	normal
Panicum_miliaceum_newGene_17055	0.00781727	0.480544	normal	0.0116973	0.536134	normal	1.72392e-11	0.928385	up	0.00557329	0.558748	normal	0.130644	-0.621173	normal
Panicum_miliaceum_newGene_17057	0.0400111	0.421649	normal	0.000890119	0.593807	up	2.43325e-06	0.837538	up	0.00317393	0.610584	up	0.358148	-0.360607	normal
Panicum_miliaceum_newGene_17059	--	--	--	2.61729e-10	3.22291	up	2.09729e-12	3.38554	up	8.60336e-07	3.07912	up	--	--	--
Panicum_miliaceum_newGene_17060	--	--	--	--	--	--	1.83317e-11	3.60712	up	--	--	--	--	--	--
Panicum_miliaceum_newGene_17062	0.00157878	0.42061	normal	0.0102322	0.454088	normal	7.48641e-09	0.718539	up	0.0382384	0.348101	normal	0.0700928	-0.596343	normal
Panicum_miliaceum_newGene_17063	0.013493	0.358678	normal	1.18753e-05	0.599913	up	5.0391e-07	0.869723	up	0.0134912	0.556791	normal	0.219573	-0.529093	normal
Panicum_miliaceum_newGene_17071	0.0373678	0.444591	normal	0.000288518	0.672313	up	2.11728e-06	0.809869	up	0.0765107	0.35891	normal	0.359871	-0.39938	normal
Panicum_miliaceum_newGene_17072	0.00308934	0.398972	normal	0.0028602	0.512908	normal	1.87899e-09	0.796062	up	0.00608314	0.499387	normal	0.161893	-0.564319	normal
Panicum_miliaceum_newGene_17073	0.126376	0.384018	normal	0.0964229	0.415329	normal	0.000231541	0.89332	up	0.0197312	0.766619	normal	0.157616	-0.63072	normal
Panicum_miliaceum_newGene_17078	0.13014	0.262899	normal	6.27887e-06	0.611446	up	0.000210799	0.734089	up	0.00481034	0.57072	normal	0.169783	-0.510854	normal
Panicum_miliaceum_newGene_17079	0.00533784	0.488645	normal	0.0103348	0.481635	normal	2.48798e-10	0.834553	up	0.00528715	0.508275	normal	0.136764	-0.551968	normal
Panicum_miliaceum_newGene_17080	0.018498	0.482343	normal	5.82862e-17	0.886023	up	7.37134e-09	0.968034	up	0.00469714	0.621719	up	0.460947	-0.347153	normal
Panicum_miliaceum_newGene_17083	0.157778	0.296822	normal	0.105551	0.488882	normal	8.1045e-06	0.814679	up	0.261643	0.29014	normal	0.00875383	-0.893096	down
Panicum_miliaceum_newGene_17084	1.17897e-05	0.533784	normal	2.32486e-07	0.693786	up	6.31146e-14	0.876336	up	0.000125007	0.618437	up	0.424558	-0.316748	normal
Panicum_miliaceum_newGene_17085	0.00723612	0.344864	normal	1.52792e-05	0.593325	up	8.86319e-09	0.749632	up	0.00791526	0.462668	normal	0.163924	-0.478264	normal
Panicum_miliaceum_newGene_17088	0.0307768	0.319974	normal	1.89794e-05	0.586154	up	5.54992e-11	0.914316	up	9.67898e-05	0.697937	up	0.331463	-0.439001	normal
Panicum_miliaceum_newGene_1709	0.106863	0.469808	normal	1.18652e-06	1.06962	up	2.84796e-08	1.14593	up	0.000113991	1.11728	up	0.840982	-0.0726798	normal
Panicum_miliaceum_newGene_17090	0.0107502	0.329392	normal	0.000225704	0.581343	normal	2.75007e-10	0.813042	up	0.0260068	0.453634	normal	0.179826	-0.494233	normal
Panicum_miliaceum_newGene_17092	0.0556999	0.445266	normal	0.0354893	0.480439	normal	0.000133737	0.792345	up	0.00443599	0.464444	normal	0.0620766	-0.728466	normal
Panicum_miliaceum_newGene_171	0.0172797	0.968892	normal	0.00697786	0.969519	up	4.86088e-07	1.37172	up	0.170515	0.787858	normal	2.55892e-05	1.7044	up
Panicum_miliaceum_newGene_1710	0.542081	-0.137872	normal	0.567165	-0.143828	normal	0.559717	0.114709	normal	0.434832	0.186008	normal	0.000108883	1.44358	up
Panicum_miliaceum_newGene_17101	7.98715e-07	0.716674	up	1.92762e-09	1.09589	up	4.59926e-05	0.794145	up	0.00372227	0.772887	up	0.0650233	-0.808732	normal
Panicum_miliaceum_newGene_17102	0.0575922	0.354095	normal	0.0369545	0.392554	normal	4.36281e-08	0.923379	up	0.0077317	0.509391	normal	0.278348	-0.497547	normal
Panicum_miliaceum_newGene_17103	0.0636313	0.360887	normal	0.00931894	0.552637	normal	3.16846e-06	0.765552	up	0.00287009	0.668211	up	0.27457	-0.53942	normal
Panicum_miliaceum_newGene_17104	0.00290247	0.363603	normal	1.75979e-05	0.593743	up	2.04865e-09	0.762253	up	0.0193724	0.409818	normal	0.82649	-0.146811	normal
Panicum_miliaceum_newGene_17105	0.0719362	0.330386	normal	0.000461683	0.57616	normal	1.07087e-06	0.752327	up	0.104867	0.309489	normal	0.138414	-0.484216	normal
Panicum_miliaceum_newGene_1712	0.106366	0.790308	normal	0.00651272	1.22324	up	0.00297331	1.26159	up	4.36618e-06	1.88683	up	0.847421	0.183126	normal
Panicum_miliaceum_newGene_1713	--	--	--	--	--	--	--	--	--	--	--	--	0.000102731	3.24603	up
Panicum_miliaceum_newGene_17132	5.14045e-07	2.49039	up	1.01338e-11	3.28991	up	1.16835e-21	4.30269	up	1.65508e-10	3.20829	up	0.0327781	3.40687	normal
Panicum_miliaceum_newGene_1714	0.473762	-0.402993	normal	0.0244264	0.899465	normal	0.027888	0.864204	normal	0.00359596	1.17403	up	0.77869	-0.216828	normal
Panicum_miliaceum_newGene_17171	0.000420793	0.946437	up	0.00190299	1.03833	up	9.51104e-08	1.54715	up	0.0714439	0.660367	normal	0.973919	0.028001	normal
Panicum_miliaceum_newGene_1718	0.0305239	0.447728	normal	0.00118859	0.718545	up	2.61963e-06	0.947302	up	0.0157335	0.629496	normal	0.248473	-0.426688	normal
Panicum_miliaceum_newGene_17197	0.0196113	0.378099	normal	1.44071e-05	0.705486	up	0.000957279	0.598573	up	0.220371	0.230919	normal	0.0648258	-0.559387	normal
Panicum_miliaceum_newGene_1720	0.695148	0.116437	normal	0.96838	0.013491	normal	0.0102005	0.626559	normal	0.00277152	0.996364	up	0.756836	0.148002	normal
Panicum_miliaceum_newGene_17215	--	--	--	7.04172e-09	3.65002	up	--	--	--	--	--	--	--	--	--
Panicum_miliaceum_newGene_17216	--	--	--	--	--	--	2.49661e-14	4.34622	up	--	--	--	--	--	--
Panicum_miliaceum_newGene_17218	--	--	--	--	--	--	6.84695e-10	4.02784	up	--	--	--	--	--	--
Panicum_miliaceum_newGene_1722	0.104979	-0.333182	normal	0.315531	0.224003	normal	0.000941784	0.533402	normal	0.0706676	0.573564	normal	0.00802955	0.844286	up
Panicum_miliaceum_newGene_17220	--	--	--	--	--	--	2.45008e-10	4.01498	up	--	--	--	--	--	--
Panicum_miliaceum_newGene_17229	0.264745	-0.651585	normal	0.201711	-0.575472	normal	0.0793754	-0.775569	normal	0.324272	-0.475596	normal	2.70279e-05	1.62913	up
Panicum_miliaceum_newGene_17230	--	--	--	--	--	--	--	--	--	--	--	--	4.5412e-06	4.06392	up
Panicum_miliaceum_newGene_17245	0.414586	-0.412034	normal	0.797715	-0.129455	normal	0.787535	-0.11774	normal	0.906437	0.0567494	normal	2.63262e-06	1.75485	up
Panicum_miliaceum_newGene_17248	--	--	--	--	--	--	1.34931e-08	2.99021	up	--	--	--	--	--	--
Panicum_miliaceum_newGene_17258	0.0367565	1.11602	normal	--	--	--	--	--	--	0.00285835	1.84577	up	--	--	--
Panicum_miliaceum_newGene_17260	1.00462e-15	2.03092	up	2.79991e-21	2.37346	up	8.32018e-29	2.63141	up	1.83986e-10	1.779	up	0.0209484	0.933366	normal
Panicum_miliaceum_newGene_17262	5.79055e-18	1.86843	up	3.65847e-29	2.22043	up	1.03574e-38	2.52673	up	4.25933e-13	1.77128	up	0.00453629	0.780363	up
Panicum_miliaceum_newGene_17278	0.0112804	0.368156	normal	7.14691e-07	0.609248	up	2.57722e-09	0.781568	up	0.00653107	0.468922	normal	0.184356	-0.443667	normal
Panicum_miliaceum_newGene_17279	0.00467804	0.378563	normal	5.79116e-05	0.604681	up	2.2665e-08	0.757666	up	0.00427763	0.476683	normal	0.151128	-0.513768	normal
Panicum_miliaceum_newGene_17280	0.00303731	0.38149	normal	0.00425802	0.520855	normal	3.53916e-09	0.785094	up	0.00430769	0.523649	normal	0.188287	-0.538829	normal
Panicum_miliaceum_newGene_17284	0.0718145	2.47681	normal	0.364611	0.954597	normal	3.48439e-06	1.6376	up	0.0284568	1.00907	normal	8.60707e-05	1.70532	up
Panicum_miliaceum_newGene_1729	0.111217	0.364075	normal	0.216156	0.249363	normal	2.75459e-05	0.813153	up	0.0311358	0.495215	normal	0.000588493	0.995669	up
Panicum_miliaceum_newGene_17290	4.70257e-06	2.46285	up	8.71883e-17	3.71603	up	3.32942e-27	4.16835	up	6.93341e-12	3.39751	up	0.0521205	1.74075	normal
Panicum_miliaceum_newGene_17291	0.000494743	2.05728	up	1.94264e-06	3.3567	up	9.96551e-18	3.84002	up	7.08568e-07	3.36701	up	0.00930168	1.97175	up
Panicum_miliaceum_newGene_1731	--	--	--	--	--	--	5.0142e-10	3.43117	up	2.28029e-20	4.76736	up	--	--	--
Panicum_miliaceum_newGene_17331	0.00555171	0.351829	normal	1.89102e-05	0.568962	normal	9.35941e-08	0.734284	up	0.0196707	0.453671	normal	0.180312	-0.52681	normal
Panicum_miliaceum_newGene_17339	0.00479819	0.345776	normal	1.57653e-05	0.584699	normal	1.32294e-08	0.742907	up	0.0102588	0.462201	normal	0.154873	-0.494522	normal
Panicum_miliaceum_newGene_1734	--	--	--	--	--	--	--	--	--	--	--	--	1.51338e-07	3.86524	up
Panicum_miliaceum_newGene_17340	0.00536655	0.345552	normal	0.00717051	0.489044	normal	7.85598e-11	0.789215	up	0.00705502	0.49047	normal	0.236783	-0.508622	normal
Panicum_miliaceum_newGene_17341	0.00276739	0.399384	normal	0.00308562	0.516511	normal	2.29341e-11	0.84514	up	0.00641106	0.507801	normal	0.175715	-0.573197	normal
Panicum_miliaceum_newGene_1735	--	--	--	--	--	--	--	--	--	--	--	--	7.18216e-06	2.46101	up
Panicum_miliaceum_newGene_17359	--	--	--	5.22897e-07	2.86589	up	1.05354e-11	3.51774	up	--	--	--	--	--	--
Panicum_miliaceum_newGene_1737	0.615593	0.172455	normal	0.000857116	0.653494	up	2.3125e-08	0.922888	up	8.18284e-05	0.954821	up	0.464736	0.357645	normal
Panicum_miliaceum_newGene_17377	8.58422e-07	2.45019	up	2.04629e-12	3.34823	up	1.08066e-22	4.37576	up	6.50016e-11	3.26157	up	0.0373228	3.46222	normal
Panicum_miliaceum_newGene_17382	1.28546e-08	2.07068	up	7.90374e-23	3.16293	up	1.75058e-47	4.04208	up	1.90581e-10	3.24679	up	0.0396977	1.25107	normal
Panicum_miliaceum_newGene_17383	4.84766e-07	2.5351	up	1.42491e-15	3.35018	up	6.93855e-19	3.60956	up	2.01124e-10	3.14542	up	--	--	--
Panicum_miliaceum_newGene_17387	--	--	--	7.83803e-08	2.84753	up	4.62686e-16	3.46192	up	4.03579e-07	3.07838	up	--	--	--
Panicum_miliaceum_newGene_17389	0.000883541	0.380793	normal	5.51847e-05	0.659747	up	3.83322e-08	0.688636	up	0.000145088	0.566279	normal	0.127263	-0.507798	normal
Panicum_miliaceum_newGene_17390	0.0124519	0.424934	normal	0.0622156	0.38892	normal	2.73002e-13	1.10727	up	0.0648798	0.566003	normal	0.501893	-0.447053	normal
Panicum_miliaceum_newGene_17408	0.0123802	0.317772	normal	0.00935376	0.472036	normal	5.93718e-09	0.74272	up	0.00782978	0.483346	normal	0.158026	-0.583498	normal
Panicum_miliaceum_newGene_17410	--	--	--	6.18042e-13	3.91185	up	9.18611e-17	4.06915	up	--	--	--	--	--	--
Panicum_miliaceum_newGene_17422	3.54998e-06	1.94025	up	9.02685e-11	2.65218	up	4.46901e-23	3.39867	up	2.09471e-09	2.85609	up	0.265376	0.885325	normal
Panicum_miliaceum_newGene_17424	--	--	--	1.30795e-09	3.4276	up	2.8161e-20	4.19129	up	1.19025e-07	3.37433	up	--	--	--
Panicum_miliaceum_newGene_17432	5.244e-06	2.55028	up	2.70776e-12	3.35896	up	2.49092e-20	3.94707	up	5.06217e-09	3.51437	up	--	--	--
Panicum_miliaceum_newGene_17435	--	--	--	5.77976e-09	3.16675	up	9.55187e-17	3.83402	up	4.68156e-08	3.23822	up	--	--	--
Panicum_miliaceum_newGene_17436	0.000333611	2.60801	up	3.06889e-07	3.39496	up	8.20376e-14	4.17122	up	--	--	--	--	--	--
Panicum_miliaceum_newGene_17438	--	--	--	4.99015e-09	2.98851	up	1.11273e-14	3.67194	up	7.59693e-08	3.10166	up	--	--	--
Panicum_miliaceum_newGene_17443	--	--	--	3.87306e-07	2.93892	up	1.90483e-13	3.55474	up	2.17434e-06	2.8518	up	--	--	--
Panicum_miliaceum_newGene_17446	--	--	--	2.26835e-08	3.35608	up	1.59484e-12	3.7942	up	3.26057e-08	3.34422	up	--	--	--
Panicum_miliaceum_newGene_17447	--	--	--	1.56832e-11	3.73069	up	5.94899e-19	4.11042	up	3.94863e-07	3.47048	up	--	--	--
Panicum_miliaceum_newGene_17453	--	--	--	--	--	--	--	--	--	--	--	--	0.000293232	3.49669	up
Panicum_miliaceum_newGene_17461	0.0028626	0.408916	normal	5.18228e-05	0.612526	up	0.114684	0.355678	normal	0.00706899	0.508868	normal	0.13168	-0.528831	normal
Panicum_miliaceum_newGene_17462	0.443889	0.16988	normal	0.0178437	0.362058	normal	5.61283e-08	1.53098	up	0.0226041	0.422108	normal	0.100256	-0.551235	normal
Panicum_miliaceum_newGene_17465	--	--	--	3.18811e-09	4.06862	up	4.97269e-11	4.20016	up	--	--	--	--	--	--
Panicum_miliaceum_newGene_17466	3.16756e-06	2.08017	up	2.71755e-14	3.15567	up	6.90996e-26	3.85834	up	2.25547e-08	3.02549	up	--	--	--
Panicum_miliaceum_newGene_17470	--	--	--	--	--	--	1.62171e-07	2.71234	up	--	--	--	--	--	--
Panicum_miliaceum_newGene_17474	--	--	--	--	--	--	7.15618e-10	3.47315	up	--	--	--	--	--	--
Panicum_miliaceum_newGene_17475	--	--	--	--	--	--	5.77676e-10	3.49342	up	--	--	--	--	--	--
Panicum_miliaceum_newGene_17476	--	--	--	--	--	--	5.71362e-11	3.60551	up	--	--	--	--	--	--
Panicum_miliaceum_newGene_17486	--	--	--	--	--	--	1.79774e-09	3.66082	up	--	--	--	--	--	--
Panicum_miliaceum_newGene_17504	1.1037e-07	2.18028	up	1.03872e-17	3.23793	up	2.41626e-35	3.80851	up	9.7101e-12	3.20373	up	0.0201987	1.53872	normal
Panicum_miliaceum_newGene_17506	--	--	--	--	--	--	4.64661e-11	4.03754	up	--	--	--	--	--	--
Panicum_miliaceum_newGene_17517	0.000247267	1.3917	up	0.00658467	1.19584	up	5.83062e-05	1.5175	up	0.158659	0.638244	normal	0.648003	0.362288	normal
Panicum_miliaceum_newGene_17518	5.73019e-07	2.26749	up	1.53499e-09	2.76936	up	1.69977e-26	4.18727	up	9.41526e-23	3.93398	up	--	--	--
Panicum_miliaceum_newGene_17528	--	--	--	0.0105123	1.47267	normal	0.00189961	1.793	up	0.202997	0.874527	normal	--	--	--
Panicum_miliaceum_newGene_17530	--	--	--	--	--	--	1.3892e-07	4.11285	up	--	--	--	--	--	--
Panicum_miliaceum_newGene_17534	0.021012	2.01563	normal	1.98472e-05	3.17443	up	3.54605e-06	2.44562	up	0.0157868	1.68504	normal	--	--	--
Panicum_miliaceum_newGene_17538	3.57373e-09	1.73636	up	6.40627e-22	2.42925	up	4.03819e-26	2.78298	up	0.000221957	1.3044	up	0.702538	-0.187693	normal
Panicum_miliaceum_newGene_17539	--	--	--	7.05338e-05	3.26666	up	0.000160818	2.32279	up	--	--	--	--	--	--
Panicum_miliaceum_newGene_17559	2.28205e-24	4.79936	up	4.8897e-57	6.74315	up	2.31283e-112	7.67586	up	1.34149e-64	7.61277	up	0.0477407	1.65863	normal
Panicum_miliaceum_newGene_17598	0.238739	0.223132	normal	0.00822836	0.398905	normal	6.89619e-06	0.89007	up	0.000187658	0.876389	up	0.705859	0.171901	normal
Panicum_miliaceum_newGene_17601	9.43318e-06	2.86769	up	--	--	--	--	--	--	--	--	--	--	--	--
Panicum_miliaceum_newGene_1763	0.968256	0.0106558	normal	4.35586e-05	0.588077	up	1.18543e-13	1.18106	up	1.01181e-09	1.46366	up	0.540129	0.283583	normal
Panicum_miliaceum_newGene_17638	--	--	--	--	--	--	--	--	--	--	--	--	1.93035e-25	4.66541	up
Panicum_miliaceum_newGene_17643	0.0517069	-1.26106	normal	0.245751	-0.927851	normal	0.133496	-0.810216	normal	0.240858	0.492659	normal	1.67475e-05	2.286	up
Panicum_miliaceum_newGene_17648	--	--	--	--	--	--	--	--	--	--	--	--	5.83158e-11	3.79273	up
Panicum_miliaceum_newGene_17655	0.00936265	0.46573	normal	0.000112386	0.70368	up	1.04512e-08	0.982418	up	2.9396e-06	1.02001	up	0.752476	0.0978282	normal
Panicum_miliaceum_newGene_17676	--	--	--	2.5956e-06	2.70737	up	1.76692e-14	3.67618	up	--	--	--	--	--	--
Panicum_miliaceum_newGene_17677	--	--	--	--	--	--	1.89594e-13	3.77824	up	--	--	--	--	--	--
Panicum_miliaceum_newGene_17684	0.0980689	0.297083	normal	0.00510548	0.706477	up	0.306671	0.291589	normal	0.134871	-0.427434	normal	0.0150884	-3.03637	normal
Panicum_miliaceum_newGene_17698	0.321918	0.485683	normal	0.644369	0.269666	normal	0.767084	0.135137	normal	0.0549558	0.823275	normal	0.000316505	1.72675	up
Panicum_miliaceum_newGene_1771	4.67251e-21	1.17626	up	4.19426e-38	1.70937	up	1.9571e-44	2.06194	up	2.03753e-25	2.39252	up	2.81219e-30	-1.63369	down
Panicum_miliaceum_newGene_17734	0.334371	-0.36812	normal	0.838178	0.0771923	normal	0.00590479	0.656562	up	6.13438e-05	1.18677	up	0.972859	0.0185773	normal
Panicum_miliaceum_newGene_17757	0.319905	-0.317734	normal	0.339142	-0.297529	normal	0.0569598	0.475667	normal	0.290539	0.374892	normal	0.00333671	1.06986	up
Panicum_miliaceum_newGene_17770	0.183007	-0.405787	normal	0.989584	-0.00564277	normal	7.25401e-05	0.912597	up	0.0907179	0.71814	normal	0.299004	-0.605295	normal
Panicum_miliaceum_newGene_17771	1.53206e-37	4.43035	up	3.42868e-88	6.59613	up	7.5235e-155	7.4731	up	4.92845e-40	6.67442	up	--	--	--
Panicum_miliaceum_newGene_17773	0.583629	0.226047	normal	0.94158	-0.0342194	normal	0.00382251	0.808368	up	0.401235	0.351394	normal	0.0423892	-1.64866	normal
Panicum_miliaceum_newGene_1782	0.000118923	2.21687	up	8.23625e-07	2.94539	up	5.59426e-13	3.35085	up	--	--	--	--	--	--
Panicum_miliaceum_newGene_17851	0.114022	0.748731	normal	0.0175493	0.945534	normal	1.21288e-05	1.41119	up	3.12778e-08	1.84376	up	0.000334347	1.87362	up
Panicum_miliaceum_newGene_17858	0.00594292	0.593319	up	5.17274e-06	0.839926	up	5.21083e-09	1.11232	up	0.0693378	0.596413	normal	0.777326	0.0814705	normal
Panicum_miliaceum_newGene_17871	--	--	--	--	--	--	--	--	--	--	--	--	2.49112e-06	5.87804	up
Panicum_miliaceum_newGene_17878	4.818e-07	1.23215	up	7.07495e-38	2.1884	up	3.55542e-106	3.34697	up	1.04968e-23	3.18803	up	0.00049266	0.983587	up
Panicum_miliaceum_newGene_17897	0.0117119	0.635619	normal	1.22988e-05	1.03297	up	5.61944e-08	1.36008	up	0.00342014	1.08499	up	0.522525	0.304767	normal
Panicum_miliaceum_newGene_17911	--	--	--	--	--	--	--	--	--	--	--	--	0.000640067	2.16162	up
Panicum_miliaceum_newGene_17918	0.00313024	1.6883	up	9.28662e-05	2.0739	up	0.00367889	1.64789	up	0.639189	0.356292	normal	0.0124695	1.7025	normal
Panicum_miliaceum_newGene_17932	0.85119	0.0925537	normal	7.59229e-05	0.953879	up	2.60317e-26	2.20087	up	1.21289e-21	2.60653	up	0.0126396	1.00904	normal
Panicum_miliaceum_newGene_17957	0.112394	0.311545	normal	0.122878	0.538449	normal	0.0512466	0.366089	normal	0.423507	0.178992	normal	0.000572049	1.05345	up
Panicum_miliaceum_newGene_17958	1.01563e-06	1.0199	up	0.000507365	0.751003	up	0.0218362	0.643259	normal	0.110555	-0.458572	normal	0.136633	0.439801	normal
Panicum_miliaceum_newGene_17966	0.975409	-0.0117335	normal	0.643773	0.185845	normal	0.0868086	0.546961	normal	0.00028497	1.02831	up	0.0353642	0.829736	normal
Panicum_miliaceum_newGene_17974	0.641736	-0.136928	normal	0.3086	-0.289794	normal	0.492964	0.142816	normal	0.578342	-0.160373	normal	4.9213e-05	1.13893	up
Panicum_miliaceum_newGene_17990	0.00163761	0.675179	up	3.29933e-07	1.15006	up	3.63539e-08	1.28754	up	0.00315458	0.847902	up	0.00240646	1.12427	up
Panicum_miliaceum_newGene_17992	0.124648	0.30954	normal	4.38576e-15	1.22409	up	5.08402e-20	1.14501	up	0.899715	0.0472429	normal	0.0863182	-0.623732	normal
Panicum_miliaceum_newGene_17993	3.22908e-28	1.07684	up	6.84846e-28	1.86467	up	3.89985e-27	1.90908	up	1.66967e-06	0.75467	up	0.0271653	0.534985	normal
Panicum_miliaceum_newGene_18007	0.00747889	0.667407	up	4.88597e-05	0.816054	up	1.43444e-06	0.908361	up	0.0219994	0.510372	normal	0.495675	0.439163	normal
Panicum_miliaceum_newGene_18013	0.322469	0.243478	normal	0.00318817	0.609328	up	1.97147e-05	0.862898	up	0.00503673	0.684398	up	0.627823	-0.166887	normal
Panicum_miliaceum_newGene_18016	0.00136009	1.15492	up	0.00518836	1.12371	up	4.36028e-05	1.01614	up	0.910642	-0.0649617	normal	0.725906	-0.433268	normal
Panicum_miliaceum_newGene_18033	0.840444	0.126949	normal	0.570496	-0.332607	normal	0.152948	-0.696648	normal	0.50517	-0.350784	normal	0.000147285	1.88506	up
Panicum_miliaceum_newGene_18037	0.222952	-0.268314	normal	0.0411172	-0.316268	normal	0.687331	0.0777778	normal	0.128036	0.370937	normal	0.0015271	0.617129	up
Panicum_miliaceum_newGene_18040	0.0418533	0.887266	normal	0.0583137	0.917529	normal	0.00964158	1.1025	up	0.404754	0.493857	normal	--	--	--
Panicum_miliaceum_newGene_18046	0.805806	0.126594	normal	0.221215	0.7154	normal	2.09253e-08	1.52074	up	7.46642e-25	2.45656	up	0.0349694	1.15417	normal
Panicum_miliaceum_newGene_18062	0.536785	0.307995	normal	0.424202	0.310485	normal	0.0218699	0.750375	normal	0.000833843	1.08843	up	0.190864	0.675347	normal
Panicum_miliaceum_newGene_18071	1.53804e-10	1.90356	up	7.00006e-31	2.9516	up	1.59845e-34	3.65084	up	3.96801e-06	1.39969	up	0.00981914	1.05589	up
Panicum_miliaceum_newGene_18075	0.127383	0.295218	normal	9.19393e-06	0.776299	up	1.40414e-07	1.15018	up	1.89201e-12	1.55653	up	0.280745	0.291315	normal
Panicum_miliaceum_newGene_18079	0.00102435	1.59748	up	--	--	--	--	--	--	--	--	--	--	--	--
Panicum_miliaceum_newGene_18082	1.87248e-09	2.49505	up	9.605e-10	2.82784	up	8.7153e-14	2.98572	up	0.011644	1.56143	normal	0.0705684	1.22082	normal
Panicum_miliaceum_newGene_18085	0.00016652	0.769326	up	0.0155964	0.578237	normal	0.121898	0.352455	normal	0.0319678	-0.519514	normal	0.833595	0.0896206	normal
Panicum_miliaceum_newGene_18088	0.156875	0.38792	normal	0.00603546	0.777268	up	0.00213138	0.836977	up	0.00162277	0.860484	up	0.222643	-0.801657	normal
Panicum_miliaceum_newGene_18094	0.195342	0.345344	normal	0.00612112	0.63681	up	6.00635e-07	1.03801	up	0.00015323	1.12189	up	0.217324	0.464669	normal
Panicum_miliaceum_newGene_1811	0.00011661	0.613391	up	3.83388e-06	0.777377	up	5.5369e-06	0.847018	up	0.384557	-0.278057	normal	0.866634	-0.0701104	normal
Panicum_miliaceum_newGene_18115	0.0334727	0.761405	normal	1.39291e-05	1.31457	up	6.35389e-11	1.76821	up	2.29894e-06	1.70295	up	0.0140244	1.12143	normal
Panicum_miliaceum_newGene_18118	0.78985	-0.234595	normal	0.0348078	0.88111	normal	0.0572703	1.02419	normal	6.20414e-07	1.35701	up	0.268517	0.423543	normal
Panicum_miliaceum_newGene_18147	0.0866683	0.88136	normal	0.176607	0.694964	normal	0.000260463	1.4391	up	0.141733	0.83897	normal	0.677476	0.384399	normal
Panicum_miliaceum_newGene_18157	0.158823	0.359545	normal	0.322095	0.29939	normal	0.0251884	0.690629	normal	0.000615832	0.92623	up	1.79234e-07	1.43844	up
Panicum_miliaceum_newGene_18163	0.86593	0.0589307	normal	0.0302212	0.406714	normal	0.000422632	0.659517	up	0.0254448	0.675817	normal	0.988735	0.00561027	normal
Panicum_miliaceum_newGene_18176	0.822047	0.0712246	normal	0.102979	0.389376	normal	4.09253e-15	1.42056	up	6.45228e-06	1.89081	up	0.840061	0.198033	normal
Panicum_miliaceum_newGene_18192	0.0374382	0.440291	normal	0.000111399	0.767975	up	2.88052e-07	1.08491	up	0.000337389	0.803684	up	0.953716	0.0206926	normal
Panicum_miliaceum_newGene_18194	0.222362	-0.235569	normal	0.76911	0.0553139	normal	0.0266372	0.417114	normal	1.29132e-06	0.890006	up	0.0711193	0.559298	normal
Panicum_miliaceum_newGene_18203	0.452008	0.156745	normal	0.0115462	0.397574	normal	2.50572e-06	0.928141	up	0.000128704	0.906284	up	0.00134268	0.986395	up
Panicum_miliaceum_newGene_18263	--	--	--	--	--	--	--	--	--	--	--	--	0.000255426	2.00812	up
Panicum_miliaceum_newGene_18264	0.0137165	0.572563	normal	8.37707e-10	1.27477	up	1.98349e-15	1.67519	up	6.80044e-11	1.60677	up	0.654404	0.169	normal
Panicum_miliaceum_newGene_18274	--	--	--	--	--	--	2.99281e-08	3.17117	up	--	--	--	--	--	--
Panicum_miliaceum_newGene_18283	0.790094	0.118353	normal	0.879215	-0.0773141	normal	0.729248	0.0943866	normal	0.0002255	0.833972	up	0.0626986	0.562357	normal
Panicum_miliaceum_newGene_18297	--	--	--	--	--	--	--	--	--	0.00924118	1.56148	up	9.54799e-22	4.58966	up
Panicum_miliaceum_newGene_183	0.0503984	0.632961	normal	1.3742e-07	1.27226	up	2.00675e-07	1.52236	up	0.0874125	0.455695	normal	0.000123402	-1.22223	down
Panicum_miliaceum_newGene_18301	0.00373495	1.48044	up	6.55765e-10	2.17655	up	3.16625e-17	2.88949	up	4.08129e-05	1.97021	up	0.400161	0.625302	normal
Panicum_miliaceum_newGene_18309	0.996174	0.00355592	normal	0.922177	0.0667616	normal	0.61798	-0.352129	normal	0.471966	0.365981	normal	0.00169906	1.21598	up
Panicum_miliaceum_newGene_18311	0.325529	-0.319521	normal	0.486372	0.17862	normal	0.00068582	0.724617	up	0.0298821	0.672145	normal	0.603712	0.191106	normal
Panicum_miliaceum_newGene_18329	0.000276302	0.702935	up	1.32286e-08	0.898932	up	2.05404e-11	1.06286	up	0.0488038	0.651726	normal	0.00548311	0.691391	up
Panicum_miliaceum_newGene_18348	--	--	--	--	--	--	9.5009e-12	4.30546	up	--	--	--	--	--	--
Panicum_miliaceum_newGene_18349	--	--	--	--	--	--	3.4904e-12	4.20308	up	--	--	--	--	--	--
Panicum_miliaceum_newGene_1837	--	--	--	--	--	--	1.07961e-09	4.46859	up	--	--	--	--	--	--
Panicum_miliaceum_newGene_18383	4.62349e-07	0.770555	up	3.65452e-13	1.18218	up	3.99433e-17	1.48051	up	0.000143875	1.06529	up	0.0346771	0.519367	normal
Panicum_miliaceum_newGene_18397	0.151063	0.545158	normal	0.000301549	1.20095	up	7.50073e-09	1.52109	up	9.92079e-17	2.23849	up	0.167272	0.564841	normal
Panicum_miliaceum_newGene_18400	0.126142	0.764327	normal	0.000499055	1.86214	up	5.49373e-07	1.85557	up	0.133095	1.04275	normal	0.418779	0.632282	normal
Panicum_miliaceum_newGene_18435	0.5698	0.13894	normal	0.00122642	0.531515	normal	8.03037e-07	1.00003	up	0.0150526	0.726888	normal	0.16424	-0.349934	normal
Panicum_miliaceum_newGene_18437	7.56519e-07	1.59719	up	1.9719e-13	2.23623	up	1.17155e-10	2.47432	up	1.00325e-08	2.28878	up	0.539525	0.373909	normal
Panicum_miliaceum_newGene_18439	3.50962e-07	1.54635	up	6.26161e-07	1.5404	up	2.18905e-07	1.63071	up	0.360178	0.378099	normal	0.0476221	-1.26135	normal
Panicum_miliaceum_newGene_18454	0.0863538	0.44508	normal	4.084e-16	1.45662	up	1.54374e-30	2.08159	up	3.03818e-07	1.69333	up	0.417801	-0.28684	normal
Panicum_miliaceum_newGene_18461	0.107017	0.927752	normal	--	--	--	0.0562542	1.15878	normal	0.0328326	1.1642	normal	3.61922e-08	2.98667	up
Panicum_miliaceum_newGene_18468	3.20857e-17	2.361	up	2.49817e-11	2.13857	up	2.41716e-12	1.89602	up	0.539166	0.261353	normal	0.160085	-0.631852	normal
Panicum_miliaceum_newGene_18476	4.40015e-06	0.991931	up	0.00141684	0.798513	up	4.4207e-08	1.05015	up	0.0219688	0.710926	normal	0.702131	-0.205144	normal
Panicum_miliaceum_newGene_18477	0.468821	0.158786	normal	0.95721	-0.015287	normal	0.426772	0.185315	normal	0.083073	0.402793	normal	0.000134822	0.992145	up
Panicum_miliaceum_newGene_18494	--	--	--	--	--	--	--	--	--	3.41051e-12	3.60324	up	--	--	--
Panicum_miliaceum_newGene_18496	0.922977	0.0520773	normal	0.509176	0.184389	normal	0.114249	0.372028	normal	0.213436	0.387136	normal	4.48587e-31	2.77897	up
Panicum_miliaceum_newGene_185	0.0164586	0.878416	normal	0.000425477	1.33284	up	3.41608e-10	2.00639	up	0.0133621	1.21259	normal	0.0823369	-1.37771	normal
Panicum_miliaceum_newGene_18501	0.00179899	1.46663	up	0.128505	0.846906	normal	0.00118167	1.52347	up	0.171951	0.825507	normal	0.212236	-1.16311	normal
Panicum_miliaceum_newGene_18503	--	--	--	--	--	--	--	--	--	--	--	--	0.000156564	2.61721	up
Panicum_miliaceum_newGene_18517	--	--	--	--	--	--	--	--	--	1.03038e-11	9.50456	up	--	--	--
Panicum_miliaceum_newGene_18530	0.924978	-0.0531272	normal	0.439634	0.297793	normal	0.00267234	0.95695	up	0.0022158	1.06671	up	0.312409	0.475362	normal
Panicum_miliaceum_newGene_18536	--	--	--	0.000243838	3.80264	up	5.94647e-07	4.01133	up	4.20737e-08	4.52086	up	--	--	--
Panicum_miliaceum_newGene_18549	0.000210376	0.835858	up	0.00155613	0.794683	up	8.5793e-05	1.07138	up	0.000146807	1.02277	up	0.667281	-0.229982	normal
Panicum_miliaceum_newGene_18554	0.000173356	2.00711	up	7.21588e-08	2.58951	up	6.85428e-14	3.19893	up	--	--	--	--	--	--
Panicum_miliaceum_newGene_18557	0.762633	-0.0967917	normal	0.950208	-0.016982	normal	0.0193487	0.484171	normal	0.0585563	0.527435	normal	0.000519796	1.30256	up
Panicum_miliaceum_newGene_18565	0.0394538	1.20656	normal	0.0358142	1.17679	normal	0.00149424	1.55205	up	0.567571	0.48624	normal	0.35454	1.01603	normal
Panicum_miliaceum_newGene_18585	0.680584	0.194453	normal	0.0486051	0.600836	normal	0.00809581	0.788102	up	0.098614	0.626903	normal	0.803045	-0.140983	normal
Panicum_miliaceum_newGene_18611	6.62176e-08	2.40774	up	4.10539e-12	2.94164	up	4.87228e-31	4.03112	up	3.62545e-19	4.43442	up	--	--	--
Panicum_miliaceum_newGene_18612	--	--	--	--	--	--	0.848571	-0.127477	normal	--	--	--	1.95027e-06	2.37768	up
Panicum_miliaceum_newGene_18623	3.83221e-20	1.63257	up	4.12099e-31	2.23231	up	2.23212e-34	2.51015	up	5.64669e-13	1.97337	up	0.343796	0.307914	normal
Panicum_miliaceum_newGene_18631	0.213673	0.535926	normal	0.00914946	1.12446	up	1.35515e-05	1.49001	up	0.0590234	0.910467	normal	0.119513	-1.10535	normal
Panicum_miliaceum_newGene_18632	5.20996e-12	2.73962	up	5.41822e-27	4.26271	up	2.95317e-73	5.26901	up	1.53193e-33	5.31502	up	--	--	--
Panicum_miliaceum_newGene_18644	0.000578572	3.22158	up	--	--	--	--	--	--	--	--	--	--	--	--
Panicum_miliaceum_newGene_18659	0.030816	0.560794	normal	0.00426195	0.697947	up	6.53672e-08	1.13082	up	4.34462e-13	1.58444	up	0.991483	0.00762271	normal
Panicum_miliaceum_newGene_18667	0.647097	0.201642	normal	0.000982829	0.784458	up	8.80115e-05	0.933734	up	0.0732934	0.681744	normal	5.51971e-17	2.14718	up
Panicum_miliaceum_newGene_1880	0.395997	0.414449	normal	0.206226	0.529292	normal	0.00599007	1.09949	up	0.35609	0.569427	normal	0.134004	0.779274	normal
Panicum_miliaceum_newGene_1884	0.000760629	0.685337	up	2.87545e-06	1.04312	up	1.12812e-16	1.49957	up	1.57298e-16	1.97008	up	0.193901	0.387617	normal
Panicum_miliaceum_newGene_1894	--	--	--	--	--	--	--	--	--	4.66394e-16	4.41218	up	0.000182882	2.82866	up
Panicum_miliaceum_newGene_1922	--	--	--	--	--	--	--	--	--	--	--	--	8.60991e-16	3.17624	up
Panicum_miliaceum_newGene_1924	--	--	--	--	--	--	--	--	--	--	--	--	4.25848e-14	3.39254	up
Panicum_miliaceum_newGene_1925	--	--	--	--	--	--	--	--	--	--	--	--	1.16006e-25	5.16445	up
Panicum_miliaceum_newGene_1941	5.13539e-19	2.34422	up	4.82456e-44	3.57141	up	1.04535e-50	3.91941	up	6.44731e-18	2.40577	up	0.000157987	1.63721	up
Panicum_miliaceum_newGene_1948	0.614561	0.338485	normal	0.161485	0.81329	normal	0.722658	0.213057	normal	0.000252583	1.73448	up	0.0637858	1.11896	normal
Panicum_miliaceum_newGene_1951	--	--	--	--	--	--	--	--	--	--	--	--	1.29831e-08	8.30419	up
Panicum_miliaceum_newGene_1995	3.79713e-13	1.53772	up	2.16564e-42	2.11732	up	1.22664e-43	2.92162	up	1.40117e-16	2.44772	up	0.0291745	0.60483	normal
Panicum_miliaceum_newGene_201	2.95793e-05	0.881723	up	5.42507e-31	2.11979	up	3.2244e-82	2.54262	up	3.27636e-18	2.10435	up	0.985485	-0.00496318	normal
Panicum_miliaceum_newGene_2023	0.0634396	0.469966	normal	3.41658e-06	1.02292	up	7.1732e-12	1.54135	up	1.50579e-11	1.89826	up	0.00150133	1.45991	up
Panicum_miliaceum_newGene_2024	0.653542	-0.112395	normal	0.44252	0.15816	normal	2.09177e-05	0.803428	up	0.000110063	1.0954	up	0.203946	0.419084	normal
Panicum_miliaceum_newGene_2046	0.00387994	0.517549	normal	2.94152e-11	1.12997	up	2.66168e-26	1.60511	up	4.33426e-06	1.42136	up	0.685252	-0.147867	normal
Panicum_miliaceum_newGene_2053	--	--	--	9.83872e-12	3.39746	up	1.79769e-16	3.91782	up	1.9659e-07	3.28805	up	--	--	--
Panicum_miliaceum_newGene_2056	--	--	--	--	--	--	2.72838e-06	2.16308	up	--	--	--	--	--	--
Panicum_miliaceum_newGene_2076	6.40275e-09	0.998093	up	0.0166555	0.711476	normal	0.200987	0.471179	normal	0.0103652	0.611335	normal	0.00614963	-0.79053	down
Panicum_miliaceum_newGene_2087	0.21428	0.502942	normal	0.00971907	0.949883	up	9.93935e-05	1.30861	up	5.50918e-06	1.51559	up	0.217555	0.871875	normal
Panicum_miliaceum_newGene_2115	0.00880419	0.749349	up	0.0629032	0.498858	normal	0.0331988	0.82526	normal	0.309625	0.334249	normal	0.150273	0.811435	normal
Panicum_miliaceum_newGene_2130	1.87618e-05	0.819857	up	3.07318e-14	1.61426	up	3.91436e-24	2.20689	up	1.89592e-06	1.70801	up	0.911363	-0.0399337	normal
Panicum_miliaceum_newGene_2156	0.00116618	0.52791	normal	8.44931e-06	0.744213	up	7.05588e-15	1.61873	up	0.000620313	1.1918	up	0.898964	0.0847546	normal
Panicum_miliaceum_newGene_2184	0.262223	-0.536822	normal	0.435032	-0.448484	normal	0.377712	0.360764	normal	0.000164744	1.42363	up	0.993409	0.00667858	normal
Panicum_miliaceum_newGene_219	0.333867	0.990706	normal	0.310826	1.20095	normal	0.11878	1.31885	normal	1.54594e-05	2.97078	up	--	--	--
Panicum_miliaceum_newGene_2222	0.893375	-0.0398575	normal	0.0563881	0.318026	normal	0.000922127	0.600551	up	0.0991499	0.442366	normal	0.769752	-0.111909	normal
Panicum_miliaceum_newGene_223	0.33057	0.235046	normal	0.578594	0.172503	normal	0.128757	0.340323	normal	0.00161538	0.775814	up	0.678493	0.145983	normal
Panicum_miliaceum_newGene_2251	0.64537	-0.167693	normal	0.467395	-0.255951	normal	0.842695	0.061607	normal	0.825018	0.0862633	normal	0.000102024	1.63562	up
Panicum_miliaceum_newGene_2296	--	--	--	--	--	--	--	--	--	--	--	--	0.00228407	2.03452	up
Panicum_miliaceum_newGene_23	--	--	--	--	--	--	--	--	--	--	--	--	0.000895424	2.69434	up
Panicum_miliaceum_newGene_2306	0.00474098	0.97255	up	4.87714e-08	1.62687	up	1.63507e-10	1.74923	up	1.56983e-07	2.07922	up	0.435042	-0.566622	normal
Panicum_miliaceum_newGene_2319	0.567089	-0.129187	normal	0.996593	0.0015448	normal	0.747766	0.0774511	normal	0.00783925	0.726609	up	0.630736	-0.211389	normal
Panicum_miliaceum_newGene_2335	0.227876	0.225444	normal	0.230861	0.299896	normal	0.0181364	0.418921	normal	0.00656768	0.621983	up	0.487907	-0.173786	normal
Panicum_miliaceum_newGene_234	0.793261	0.0540851	normal	0.00982664	0.446384	normal	2.50595e-07	0.837911	up	1.20997e-10	1.119	up	0.73851	-0.103769	normal
Panicum_miliaceum_newGene_235	0.790615	-0.117471	normal	0.819257	0.123084	normal	0.00229094	0.856209	up	2.32841e-06	1.72173	up	0.0979398	0.699756	normal
Panicum_miliaceum_newGene_2350	0.107438	0.560483	normal	0.0711383	0.622912	normal	0.328836	0.349265	normal	0.00727743	0.841044	up	0.699495	0.280034	normal
Panicum_miliaceum_newGene_2371	0.062084	0.457988	normal	8.42886e-05	0.885648	up	1.18632e-08	1.20773	up	3.60957e-10	1.55384	up	0.360905	0.30489	normal
Panicum_miliaceum_newGene_2377	0.00591694	0.787076	up	0.00310631	0.906235	up	0.91398	0.048059	normal	0.00292286	-1.15858	down	0.147266	0.922037	normal
Panicum_miliaceum_newGene_2380	0.538896	0.174097	normal	0.488343	-0.17818	normal	0.970382	-0.0131436	normal	0.408679	0.289915	normal	8.37742e-06	1.14225	up
Panicum_miliaceum_newGene_2382	0.333996	-0.218927	normal	0.0349785	-0.445447	normal	0.284065	-0.247763	normal	0.0222131	-0.442889	normal	0.00486391	0.818976	up
Panicum_miliaceum_newGene_2385	8.84232e-07	3.95421	up	--	--	--	--	--	--	--	--	--	--	--	--
Panicum_miliaceum_newGene_2407	0.000751453	3.05624	up	--	--	--	0.00691968	3.8583	up	0.00385839	2.86818	up	0.149335	2.34695	normal
Panicum_miliaceum_newGene_2416	0.000647293	0.688238	up	0.000514518	0.651949	up	9.29583e-06	0.871177	up	0.725217	0.0979611	normal	1.03054e-08	-1.83689	down
Panicum_miliaceum_newGene_2417	5.18848e-08	0.765475	up	3.37589e-16	1.25964	up	3.24028e-28	1.65294	up	1.31757e-06	1.38326	up	0.566118	0.14568	normal
Panicum_miliaceum_newGene_2425	0.00494037	0.418598	normal	7.91437e-11	0.925303	up	2.51545e-13	1.08734	up	1.38371e-05	1.2131	up	0.710458	0.117263	normal
Panicum_miliaceum_newGene_2431	4.21123e-09	1.09974	up	1.13609e-06	0.803883	up	0.537941	0.125999	normal	0.140721	0.27136	normal	1.85845e-14	-2.93898	down
Panicum_miliaceum_newGene_2436	--	--	--	--	--	--	--	--	--	2.66334e-13	3.60724	up	--	--	--
Panicum_miliaceum_newGene_2439	0.000263451	1.3044	up	0.0116746	1.05112	normal	3.11022e-05	1.64533	up	0.00542136	1.38972	up	0.661288	0.425738	normal
Panicum_miliaceum_newGene_2441	5.48735e-05	1.25097	up	2.13566e-08	1.74274	up	0.0261899	0.845855	normal	0.69254	0.16672	normal	0.285765	-1.33065	normal
Panicum_miliaceum_newGene_2446	2.34027e-05	0.895121	up	5.84164e-11	1.38001	up	8.02048e-11	1.5369	up	9.42819e-10	1.48629	up	0.949352	-0.0407179	normal
Panicum_miliaceum_newGene_2448	0.276601	-0.586376	normal	0.0891832	-0.974249	normal	0.0403698	-0.996472	normal	0.0151063	-1.31377	normal	1.59948e-05	2.63067	up
Panicum_miliaceum_newGene_2456	0.376682	0.188733	normal	0.0896564	0.295429	normal	0.00206524	0.539247	normal	2.45309e-07	0.816603	up	0.621994	0.15637	normal
Panicum_miliaceum_newGene_246	0.947205	0.0295359	normal	0.000183572	0.716709	up	1.50255e-08	0.976032	up	0.0068021	0.911618	up	0.995734	0.00248109	normal
Panicum_miliaceum_newGene_2476	0.914506	-0.0544118	normal	0.221274	0.336252	normal	0.01787	0.72226	normal	0.00219391	1.00227	up	0.13432	-1.12486	normal
Panicum_miliaceum_newGene_248	7.27922e-06	1.43892	up	3.91733e-11	2.02937	up	2.1747e-19	2.40432	up	8.29315e-08	1.72481	up	0.117535	0.857745	normal
Panicum_miliaceum_newGene_249	--	--	--	--	--	--	--	--	--	--	--	--	8.64338e-07	6.62234	up
Panicum_miliaceum_newGene_2504	0.452008	0.201185	normal	0.0722091	0.406784	normal	0.000117467	0.761597	up	0.000373017	0.992018	up	0.986259	-0.00888768	normal
Panicum_miliaceum_newGene_2514	0.00625564	1.6846	up	1.59933e-06	3.71127	up	1.46769e-06	2.37043	up	7.44385e-05	2.5695	up	0.0710015	2.03325	normal
Panicum_miliaceum_newGene_2519	0.00143786	0.72167	up	2.70291e-08	1.05276	up	3.44167e-14	1.53965	up	3.8017e-08	1.48849	up	0.0685642	0.701547	normal
Panicum_miliaceum_newGene_252	0.0899158	0.453722	normal	0.000162587	0.929453	up	6.33149e-10	1.47775	up	8.11786e-05	1.23151	up	0.581012	0.232963	normal
Panicum_miliaceum_newGene_2532	0.221589	0.260391	normal	0.0129919	0.56071	normal	0.00144712	0.685536	up	0.0036205	0.708101	up	0.105484	0.65502	normal
Panicum_miliaceum_newGene_2533	0.115034	0.413342	normal	0.0481677	0.492291	normal	2.00062e-05	0.933897	up	0.0558901	0.609331	normal	0.712878	-0.195689	normal
Panicum_miliaceum_newGene_2536	0.000622887	1.06193	up	0.289749	0.646598	normal	0.0055026	1.27994	up	0.0218333	0.816262	normal	0.882283	0.124348	normal
Panicum_miliaceum_newGene_2554	7.06905e-19	3.62396	up	1.6103e-37	4.88301	up	6.13982e-62	5.45842	up	4.12431e-73	6.58538	up	2.50232e-05	2.75007	up
Panicum_miliaceum_newGene_256	0.647873	-0.127248	normal	0.0980166	0.397837	normal	0.000125372	0.807828	up	0.00315546	0.890727	up	0.14827	-0.445644	normal
Panicum_miliaceum_newGene_2562	--	--	--	3.59376e-07	2.35474	up	1.758e-12	2.61036	up	1.46335e-08	2.24818	up	--	--	--
Panicum_miliaceum_newGene_2569	0.0014993	1.17531	up	1.05994e-09	1.95591	up	2.92353e-08	1.87301	up	0.071585	0.776722	normal	8.38786e-05	1.78903	up
Panicum_miliaceum_newGene_2579	0.139707	0.348766	normal	6.94996e-05	0.966914	up	1.64584e-12	1.47612	up	4.75694e-08	1.43505	up	0.839212	0.0832879	normal
Panicum_miliaceum_newGene_2585	0.00948272	1.04116	up	0.0123376	1.25696	normal	3.04798e-07	1.76724	up	1.41937e-05	1.57672	up	0.0516238	1.26845	normal
Panicum_miliaceum_newGene_2611	0.171236	0.655824	normal	0.0733128	0.784735	normal	0.00128568	1.20236	up	0.00012917	1.62765	up	0.79555	-0.223427	normal
Panicum_miliaceum_newGene_2615	0.00965974	0.695862	up	0.000329565	0.841505	up	4.68572e-07	1.23163	up	0.0372768	0.745786	normal	0.743967	0.13578	normal
Panicum_miliaceum_newGene_2621	0.0884281	0.636553	normal	0.40443	0.38356	normal	0.000132829	1.27495	up	0.0302681	0.821711	normal	0.845419	-0.124446	normal
Panicum_miliaceum_newGene_2628	0.112916	0.568431	normal	0.0493785	0.772738	normal	0.0226077	0.892414	normal	0.0366625	0.68928	normal	2.20823e-05	1.84751	up
Panicum_miliaceum_newGene_2642	0.362565	-0.475549	normal	0.0109133	-1.34778	normal	0.0295518	-1.10227	normal	4.30837e-08	-2.74593	down	0.00230976	1.55663	up
Panicum_miliaceum_newGene_2646	0.203475	-0.5777	normal	0.277838	-0.422461	normal	0.795259	0.0883606	normal	0.0113131	0.962192	normal	2.66199e-06	1.49352	up
Panicum_miliaceum_newGene_266	3.2584e-05	1.99732	up	4.08321e-06	2.59975	up	1.05981e-18	3.43732	up	5.60872e-07	2.7991	up	--	--	--
Panicum_miliaceum_newGene_2660	7.1063e-10	2.39251	up	1.3356e-08	2.48177	up	2.78072e-14	2.8676	up	--	--	--	--	--	--
Panicum_miliaceum_newGene_2670	0.023643	0.402076	normal	7.06881e-07	0.720215	up	2.56038e-22	1.36617	up	1.30785e-05	1.27979	up	0.230725	0.318117	normal
Panicum_miliaceum_newGene_2671	0.264176	0.400026	normal	0.00304412	0.745909	up	1.41744e-05	0.952886	up	0.00954485	0.837641	up	0.189344	0.503298	normal
Panicum_miliaceum_newGene_2675	0.551591	0.284472	normal	0.282624	0.442268	normal	0.000101082	1.20489	up	0.00545889	1.10253	up	0.0636004	0.910536	normal
Panicum_miliaceum_newGene_2677	--	--	--	2.58777e-06	1.97427	up	1.07509e-07	2.1638	up	2.4321e-07	2.15591	up	0.00115462	1.96846	up
Panicum_miliaceum_newGene_2681	0.951571	-0.0378921	normal	0.325108	0.404764	normal	0.00605547	1.00286	up	0.00400797	1.04642	up	0.424302	0.443116	normal
Panicum_miliaceum_newGene_2706	--	--	--	--	--	--	--	--	--	--	--	--	2.33876e-23	4.4441	up
Panicum_miliaceum_newGene_271	4.96808e-08	1.74305	up	2.33074e-12	2.26474	up	2.89095e-16	2.35672	up	6.40162e-14	2.63836	up	0.286532	-0.79017	normal
Panicum_miliaceum_newGene_2710	0.901759	0.0947065	normal	0.788152	0.182792	normal	0.263298	0.608858	normal	0.00165389	1.18542	up	0.6999	0.307349	normal
Panicum_miliaceum_newGene_2712	3.28599e-12	1.73936	up	3.36125e-24	2.27716	up	1.14546e-35	2.56895	up	9.6764e-19	2.44577	up	0.383503	0.463767	normal
Panicum_miliaceum_newGene_2721	0.789416	0.0940282	normal	0.849106	0.0658148	normal	0.261322	0.308356	normal	0.00952869	0.722342	up	0.206604	0.542942	normal
Panicum_miliaceum_newGene_2723	0.674792	0.148534	normal	8.42296e-05	0.990529	up	4.73993e-09	1.3424	up	1.89362e-05	1.4584	up	0.0411534	-0.768395	normal
Panicum_miliaceum_newGene_2731	0.432801	-0.228847	normal	0.883417	0.0424167	normal	0.0225877	0.70374	normal	0.000589747	0.912993	up	0.969897	0.023698	normal
Panicum_miliaceum_newGene_274	0.523801	0.16006	normal	0.0260352	0.473874	normal	0.0414075	0.480301	normal	8.71765e-05	0.832707	up	0.750277	-0.145647	normal
Panicum_miliaceum_newGene_2740	0.0010423	0.93264	up	1.46565e-05	1.03408	up	0.85231	0.487113	normal	0.368301	0.350327	normal	0.967953	-0.0260419	normal
Panicum_miliaceum_newGene_2750	9.48118e-05	1.27494	up	4.87061e-10	1.87507	up	1.00405e-08	1.72327	up	0.0154308	0.822918	normal	0.00434744	-1.86572	down
Panicum_miliaceum_newGene_2756	0.898381	-0.0777766	normal	0.178202	-0.656931	normal	0.762624	-0.141613	normal	0.156135	0.544274	normal	0.00407963	1.3907	up
Panicum_miliaceum_newGene_2757	0.00235617	0.853256	up	0.000729191	0.995308	up	0.000224353	1.1029	up	0.137673	0.614369	normal	0.453448	-0.400324	normal
Panicum_miliaceum_newGene_2781	0.172052	0.594004	normal	0.177178	0.846339	normal	0.0333053	0.798635	normal	0.000475317	1.42318	up	0.160014	1.03433	normal
Panicum_miliaceum_newGene_2794	0.160057	-0.317194	normal	0.799182	-0.0660995	normal	0.0164558	0.513646	normal	8.30655e-05	1.05754	up	0.778046	-0.120322	normal
Panicum_miliaceum_newGene_2796	0.0427165	-0.566383	normal	0.0470517	-0.457349	normal	0.70439	0.0914779	normal	0.461854	0.211504	normal	8.13731e-09	1.38203	up
Panicum_miliaceum_newGene_280	0.0265756	0.419094	normal	5.80615e-06	0.701847	up	3.09546e-17	1.38418	up	5.2387e-13	1.35461	up	0.250388	0.415896	normal
Panicum_miliaceum_newGene_2815	1.23075e-16	1.35412	up	3.19943e-25	1.69682	up	4.77511e-39	2.04397	up	3.13323e-09	1.31293	up	0.979273	0.0111781	normal
Panicum_miliaceum_newGene_2828	0.807518	0.161893	normal	0.186088	0.579244	normal	0.0219729	0.806086	normal	0.00955905	1.10813	up	0.707574	0.267857	normal
Panicum_miliaceum_newGene_2834	1.53455e-06	2.99193	up	3.10713e-07	3.23059	up	3.70278e-09	3.5592	up	1.04826e-07	3.45641	up	--	--	--
Panicum_miliaceum_newGene_2860	7.53055e-32	2.28278	up	2.65083e-63	3.30209	up	4.64082e-158	4.52246	up	3.79348e-59	4.72245	up	1.0106e-05	1.36952	up
Panicum_miliaceum_newGene_2878	7.87051e-09	1.69941	up	2.36029e-19	2.56177	up	8.9462e-34	3.21255	up	1.42001e-11	2.07346	up	0.116041	0.826973	normal
Panicum_miliaceum_newGene_289	0.427783	0.193554	normal	0.000993635	0.806099	up	6.16889e-08	1.05402	up	2.47663e-09	1.54361	up	0.587697	0.20368	normal
Panicum_miliaceum_newGene_2906	7.56518e-13	3.37814	up	2.1528e-19	4.27682	up	3.59805e-11	4.54881	up	7.65598e-16	4.12575	up	0.00121907	2.37441	up
Panicum_miliaceum_newGene_2921	--	--	--	--	--	--	--	--	--	--	--	--	0.000825938	1.85774	up
Panicum_miliaceum_newGene_2928	0.928297	-0.0723553	normal	0.0549271	-0.969045	normal	0.00243982	-1.35322	down	0.927558	-0.0431611	normal	0.00346475	1.48241	up
Panicum_miliaceum_newGene_2931	0.00125106	1.67972	up	0.330524	0.599241	normal	0.000422162	1.48205	up	5.34014e-05	2.60403	up	0.143522	2.44502	normal
Panicum_miliaceum_newGene_2965	--	--	--	--	--	--	--	--	--	--	--	--	5.38839e-08	4.1261	up
Panicum_miliaceum_newGene_298	0.146369	0.654891	normal	5.02538e-07	1.83322	up	4.82849e-05	1.43697	up	3.3031e-05	1.81616	up	0.0221713	-2.05393	normal
Panicum_miliaceum_newGene_2989	--	--	--	--	--	--	1.25676e-10	3.35802	up	2.86881e-07	3.29537	up	--	--	--
Panicum_miliaceum_newGene_2993	0.0541009	0.547805	normal	0.000148844	0.940234	up	0.00811563	0.68098	up	0.432061	0.248966	normal	0.603617	-0.254268	normal
Panicum_miliaceum_newGene_3010	--	--	--	0.00223264	1.65955	up	--	--	--	2.92074e-05	2.11987	up	--	--	--
Panicum_miliaceum_newGene_3056	0.128632	0.903415	normal	0.0119911	1.21644	normal	0.000623675	1.53285	up	0.00629068	1.45218	up	--	--	--
Panicum_miliaceum_newGene_3062	0.0612539	0.404267	normal	0.0131234	0.563256	normal	1.72696e-08	1.12384	up	0.00070469	0.828715	up	0.0114938	0.695705	normal
Panicum_miliaceum_newGene_3075	0.0314578	0.963024	normal	7.10817e-06	1.56875	up	6.41186e-16	2.59419	up	1.4751e-17	3.84961	up	0.0399691	-2.74795	normal
Panicum_miliaceum_newGene_3079	0.547763	-0.155595	normal	0.794112	0.0563036	normal	7.39645e-05	0.754048	up	5.28856e-06	0.975528	up	0.364444	0.393545	normal
Panicum_miliaceum_newGene_3089	0.0185165	-0.597794	normal	0.000120896	-0.921455	down	0.0013284	-0.647986	down	0.472072	-0.19679	normal	1.90478e-06	1.35604	up
Panicum_miliaceum_newGene_3125	0.000239677	0.963836	up	0.00468618	0.922757	up	0.0121112	0.778589	normal	0.356113	-0.388871	normal	0.0755213	-1.02883	normal
Panicum_miliaceum_newGene_3153	4.11043e-07	1.02736	up	9.00747e-16	1.50132	up	1.22616e-30	1.88816	up	0.000377114	1.24521	up	0.855123	-0.0973887	normal
Panicum_miliaceum_newGene_3177	4.33917e-05	1.13774	up	2.37434e-06	1.7192	up	3.15708e-08	1.55651	up	0.00099708	1.00739	up	0.5286	0.321446	normal
Panicum_miliaceum_newGene_3195	--	--	--	3.87064e-07	3.54631	up	--	--	--	--	--	--	--	--	--
Panicum_miliaceum_newGene_3206	3.16952e-05	1.95676	up	0.00550094	1.74999	up	0.000768274	1.759	up	--	--	--	--	--	--
Panicum_miliaceum_newGene_3217	0.0052656	0.888887	up	3.88308e-12	1.81272	up	1.37465e-26	2.21257	up	1.61953e-09	1.8033	up	0.00385751	0.998709	up
Panicum_miliaceum_newGene_3218	0.0113726	0.758088	normal	1.59897e-08	1.33469	up	1.04431e-19	1.99565	up	8.09241e-11	2.00496	up	0.0558991	0.942122	normal
Panicum_miliaceum_newGene_3219	0.0264411	1.0473	normal	1.1108e-06	1.36945	up	1.31019e-19	2.26265	up	4.11797e-09	2.24086	up	0.109096	1.13373	normal
Panicum_miliaceum_newGene_3220	0.00203961	0.854729	up	3.63002e-09	1.32842	up	6.30532e-26	1.9514	up	7.81437e-12	2.02798	up	0.161539	0.780395	normal
Panicum_miliaceum_newGene_3221	0.00215259	0.923349	up	1.8168e-06	1.6586	up	3.01409e-07	1.97773	up	0.000344547	1.25628	up	0.00292715	1.58683	up
Panicum_miliaceum_newGene_3222	0.0238862	0.539851	normal	0.0720446	0.558454	normal	0.0037976	0.855162	up	2.36353e-15	1.65641	up	5.74557e-06	2.18026	up
Panicum_miliaceum_newGene_3227	1.42607e-07	1.76206	up	0.00884158	1.77267	up	0.0108725	1.43108	normal	0.000114253	1.49527	up	--	--	--
Panicum_miliaceum_newGene_3240	0.103113	0.459794	normal	0.000144008	0.913857	up	2.55125e-06	1.19427	up	0.0201331	0.863527	normal	0.285363	0.469272	normal
Panicum_miliaceum_newGene_3273	0.4452	0.493321	normal	0.727384	0.305796	normal	--	--	--	--	--	--	0.000148497	2.36103	up
Panicum_miliaceum_newGene_3294	0.0510861	0.711483	normal	0.0012693	0.811072	up	4.37359e-05	1.18901	up	0.00229091	1.18534	up	0.983103	0.0158263	normal
Panicum_miliaceum_newGene_330	--	--	--	0.0846575	2.06631	normal	--	--	--	0.000141161	3.18512	up	--	--	--
Panicum_miliaceum_newGene_3316	0.912294	0.0289554	normal	0.965189	0.0108806	normal	4.92472e-05	0.700912	up	0.271566	0.377748	normal	5.73706e-21	-2.04095	down
Panicum_miliaceum_newGene_332	0.0161913	0.817517	normal	0.0019798	1.09118	up	0.85517	0.0718164	normal	0.298454	0.419761	normal	0.363777	-0.676227	normal
Panicum_miliaceum_newGene_3326	8.30705e-09	1.24968	up	7.91224e-07	1.19372	up	6.15965e-16	1.89097	up	6.6429e-07	1.23931	up	0.307251	0.469353	normal
Panicum_miliaceum_newGene_3355	0.00893173	-0.647672	down	2.97899e-06	-1.13007	down	0.000178646	-1.13797	down	3.34288e-14	-1.99312	down	0.000722882	0.780832	up
Panicum_miliaceum_newGene_3361	0.704547	-0.103452	normal	0.444539	-0.196966	normal	0.209898	-0.288246	normal	0.0207826	-0.473926	normal	1.25533e-06	1.40176	up
Panicum_miliaceum_newGene_3362	2.21767e-07	1.86179	up	0.000192684	1.56746	up	5.38431e-05	1.5782	up	0.114805	0.740881	normal	0.88146	0.128916	normal
Panicum_miliaceum_newGene_3385	1.60501e-14	1.32077	up	1.45053e-20	1.58646	up	6.38118e-17	1.52053	up	0.0569211	0.420945	normal	0.0153751	0.598162	normal
Panicum_miliaceum_newGene_3412	1.43845e-33	2.45055	up	5.4619e-30	2.38914	up	1.1948e-25	2.34267	up	0.000228723	1.36755	up	0.550173	-0.254694	normal
Panicum_miliaceum_newGene_344	3.09107e-12	1.87908	up	5.79885e-15	2.15143	up	6.14837e-22	2.48963	up	1.16102e-05	1.4994	up	0.666608	0.271948	normal
Panicum_miliaceum_newGene_3441	0.00278151	0.867387	up	1.06863e-10	1.50285	up	7.98557e-07	1.62594	up	0.0165519	0.924203	normal	0.943822	-0.0569391	normal
Panicum_miliaceum_newGene_3461	1.96685e-07	1.20908	up	3.21681e-06	1.30468	up	2.29678e-08	1.34379	up	0.836482	-0.0712607	normal	0.987694	-0.00889977	normal
Panicum_miliaceum_newGene_3477	0.723977	-0.238135	normal	0.92102	-0.0897895	normal	0.16073	-0.705381	normal	0.00995369	1.02939	up	0.850161	0.171335	normal
Panicum_miliaceum_newGene_3485	2.69336e-06	0.950865	up	4.19716e-07	1.18672	up	6.26204e-11	1.18338	up	0.000531615	0.870323	up	0.017993	-0.815842	normal
Panicum_miliaceum_newGene_3505	0.00208093	0.761229	up	0.000873625	0.84732	up	0.000141395	0.910878	up	0.148296	0.371094	normal	0.121378	0.666035	normal
Panicum_miliaceum_newGene_3507	0.135947	0.366785	normal	0.00162608	0.694185	up	9.58886e-08	1.05563	up	7.18435e-07	1.24961	up	0.0289112	0.668848	normal
Panicum_miliaceum_newGene_3508	--	--	--	4.64799e-08	3.21759	up	1.86131e-15	4.11144	up	3.33211e-08	3.50371	up	--	--	--
Panicum_miliaceum_newGene_3509	--	--	--	3.0168e-08	3.6395	up	1.87133e-10	3.97142	up	--	--	--	--	--	--
Panicum_miliaceum_newGene_3510	1.63752e-08	2.55433	up	2.30037e-19	3.46513	up	2.86805e-41	4.26011	up	1.60955e-12	3.72842	up	0.0130238	1.70881	normal
Panicum_miliaceum_newGene_3514	0.00173767	1.82444	up	2.15353e-08	2.84879	up	4.22522e-14	3.33502	up	--	--	--	--	--	--
Panicum_miliaceum_newGene_3515	--	--	--	6.12473e-08	3.42564	up	5.74087e-18	4.12971	up	2.43188e-07	3.20214	up	--	--	--
Panicum_miliaceum_newGene_3520	0.374118	0.326537	normal	0.00879286	0.791171	up	2.04209e-06	1.14842	up	7.09309e-09	1.52745	up	0.0835186	0.617045	normal
Panicum_miliaceum_newGene_353	0.0587114	0.718342	normal	0.0536744	0.760234	normal	3.47216e-05	1.45539	up	0.00311158	1.43192	up	0.914063	0.0833624	normal
Panicum_miliaceum_newGene_3571	0.700218	-0.141633	normal	0.000836323	-0.761678	down	0.00101608	-0.948367	down	0.326492	-0.313904	normal	7.89812e-06	1.2351	up
Panicum_miliaceum_newGene_3575	0.0363883	0.910201	normal	0.144452	0.861744	normal	0.00907313	1.28835	up	0.19851	0.658201	normal	--	--	--
Panicum_miliaceum_newGene_3609	0.520231	0.169724	normal	0.058028	0.397036	normal	2.17047e-05	0.881083	up	0.00122454	0.638455	up	0.0951678	-0.519049	normal
Panicum_miliaceum_newGene_361	0.175602	-0.573978	normal	0.174778	-0.510288	normal	0.000209841	-1.4427	down	0.120428	-0.76109	normal	0.000877197	1.24472	up
Panicum_miliaceum_newGene_3643	0.284998	0.19375	normal	0.329517	0.217353	normal	0.000178237	0.648921	up	0.0166361	0.56999	normal	0.378505	0.287542	normal
Panicum_miliaceum_newGene_3660	6.82876e-05	2.10714	up	7.36686e-08	2.74381	up	3.01085e-19	3.67988	up	1.61359e-07	2.95554	up	--	--	--
Panicum_miliaceum_newGene_3663	1.81999e-05	1.91998	up	1.74937e-17	2.8768	up	5.38384e-34	3.64548	up	4.5001e-10	2.97996	up	0.123769	1.0731	normal
Panicum_miliaceum_newGene_3664	0.151142	0.414073	normal	0.00363542	0.820965	up	3.68298e-06	1.25365	up	1.07584e-05	1.1926	up	0.383322	0.34634	normal
Panicum_miliaceum_newGene_3666	2.57885e-07	2.16216	up	2.34285e-18	3.19462	up	4.20852e-33	3.70136	up	3.13327e-09	3.12032	up	0.0760829	1.22086	normal
Panicum_miliaceum_newGene_3668	--	--	--	--	--	--	1.39093e-11	3.9215	up	4.61668e-09	3.51719	up	--	--	--
Panicum_miliaceum_newGene_3693	0.000179569	1.47642	up	3.53474e-09	1.9447	up	6.38232e-08	1.98591	up	0.00731064	1.12225	up	0.498326	-0.946431	normal
Panicum_miliaceum_newGene_3706	--	--	--	--	--	--	1.23732e-08	5.33124	up	--	--	--	--	--	--
Panicum_miliaceum_newGene_3735	0.00107279	-0.803616	down	0.00328706	-0.59968	down	0.902036	-0.0322275	normal	0.938879	-0.0262837	normal	0.00699467	0.961729	up
Panicum_miliaceum_newGene_3755	0.799823	0.07656	normal	0.237258	0.261565	normal	1.25811e-05	0.82044	up	0.0600763	0.513635	normal	0.950531	-0.0213171	normal
Panicum_miliaceum_newGene_377	1.16752e-05	0.924126	up	1.20421e-28	2.20201	up	4.73079e-22	2.34613	up	9.21374e-16	2.28475	up	0.539596	0.204861	normal
Panicum_miliaceum_newGene_3774	--	--	--	--	--	--	--	--	--	--	--	--	0.000860977	2.23626	up
Panicum_miliaceum_newGene_378	0.0770727	0.297597	normal	0.00112292	0.423746	normal	1.75932e-05	0.588702	up	0.0107297	0.524135	normal	0.000353241	0.60782	up
Panicum_miliaceum_newGene_3802	0.832183	0.0790454	normal	0.33585	0.255559	normal	0.0287049	0.562608	normal	0.0098286	0.712347	up	0.85896	-0.0965347	normal
Panicum_miliaceum_newGene_3809	--	--	--	--	--	--	--	--	--	--	--	--	1.49363e-11	8.5352	up
Panicum_miliaceum_newGene_3810	--	--	--	--	--	--	--	--	--	--	--	--	1.8775e-14	6.08969	up
Panicum_miliaceum_newGene_3812	0.155199	-0.899558	normal	0.156293	-1.0804	normal	0.0376164	-0.926927	normal	0.244466	0.550157	normal	7.49828e-22	3.34151	up
Panicum_miliaceum_newGene_3816	3.10564e-06	2.76045	up	1.20804e-09	3.6458	up	1.9749e-09	4.83366	up	1.4751e-17	4.7167	up	0.00265326	2.68286	up
Panicum_miliaceum_newGene_3819	--	--	--	4.93721e-14	5.74231	up	1.19539e-25	7.16223	up	5.62939e-15	6.32459	up	--	--	--
Panicum_miliaceum_newGene_3820	3.44951e-08	7.73352	up	4.5542e-11	8.84239	up	1.71182e-14	9.89885	up	5.94545e-10	8.53154	up	--	--	--
Panicum_miliaceum_newGene_3829	0.851084	-0.166723	normal	0.965561	0.0366726	normal	0.441857	0.50907	normal	0.205074	0.892299	normal	0.00136307	1.69588	up
Panicum_miliaceum_newGene_3841	--	--	--	0.0067088	1.21443	up	0.00658029	1.19176	up	0.00783249	1.4062	up	--	--	--
Panicum_miliaceum_newGene_3842	0.0451446	0.761982	normal	0.0144149	1.0073	normal	2.04122e-06	1.79572	up	0.0605613	0.730694	normal	0.324475	0.781381	normal
Panicum_miliaceum_newGene_386	0.573052	-0.166888	normal	0.0850319	-1.00332	normal	0.236555	0.255516	normal	0.000254161	0.590193	up	0.00156487	0.810592	up
Panicum_miliaceum_newGene_3869	0.00655939	0.587935	up	3.52476e-05	0.820539	up	0.000641177	0.867578	up	0.894121	0.0453551	normal	0.0575055	-0.705943	normal
Panicum_miliaceum_newGene_3890	0.000242035	-1.38942	down	0.000111614	-1.5869	down	0.000335327	-1.37668	down	0.000391422	-1.50593	down	0.000401469	1.34356	up
Panicum_miliaceum_newGene_390	0.107098	0.364403	normal	0.000258433	0.712086	up	7.15786e-15	1.33192	up	2.00734e-06	1.29981	up	0.871703	-0.0613758	normal
Panicum_miliaceum_newGene_391	0.0914155	0.697445	normal	0.0409411	0.722775	normal	0.000214752	1.11001	up	0.00892461	0.949861	up	0.869136	0.11194	normal
Panicum_miliaceum_newGene_3910	5.73921e-09	1.5608	up	2.21731e-28	2.49083	up	1.89083e-49	3.3878	up	5.44111e-22	3.11178	up	2.11762e-19	2.54734	up
Panicum_miliaceum_newGene_3912	4.00873e-05	2.29915	up	--	--	--	--	--	--	--	--	--	--	--	--
Panicum_miliaceum_newGene_3914	--	--	--	--	--	--	--	--	--	--	--	--	9.00847e-07	2.66396	up
Panicum_miliaceum_newGene_3917	0.0473983	0.72929	normal	6.52734e-05	0.85528	up	6.07803e-07	0.980878	up	0.0344016	0.486407	normal	0.271748	0.395324	normal
Panicum_miliaceum_newGene_392	0.480158	0.179807	normal	0.115389	0.344036	normal	0.00482856	0.778164	up	0.516018	0.196078	normal	0.125661	0.591545	normal
Panicum_miliaceum_newGene_3946	0.0503272	0.348236	normal	0.412187	0.170859	normal	0.038945	0.521006	normal	3.19508e-07	0.913243	up	4.31178e-08	1.6426	up
Panicum_miliaceum_newGene_3950	5.66975e-07	1.2173	up	1.65134e-17	2.06368	up	7.27794e-28	2.33201	up	9.71868e-07	1.71862	up	0.692359	-0.261493	normal
Panicum_miliaceum_newGene_3975	0.370931	0.489571	normal	0.00749437	0.89437	up	6.89925e-06	1.52208	up	0.0208169	0.951278	normal	0.948001	-0.042103	normal
Panicum_miliaceum_newGene_400	0.142376	0.487347	normal	1.45737e-08	1.2948	up	2.35276e-23	2.12616	up	0.00448136	0.820294	up	0.711648	-0.141896	normal
Panicum_miliaceum_newGene_4031	0.999451	0.000429007	normal	0.704368	-0.216819	normal	0.433422	-0.284317	normal	0.90386	-0.0554901	normal	0.000148518	1.52853	up
Panicum_miliaceum_newGene_4035	1.13488e-08	0.941527	up	6.25033e-20	1.67943	up	5.50533e-28	2.06893	up	2.20265e-15	1.96578	up	0.992041	-0.00530903	normal
Panicum_miliaceum_newGene_4036	0.0161907	0.347965	normal	0.000761022	0.609672	up	6.21794e-14	1.0232	up	3.3641e-06	0.86256	up	0.00245098	-0.748203	down
Panicum_miliaceum_newGene_4049	0.00292614	0.745418	up	1.45138e-09	1.54631	up	2.83694e-21	1.83272	up	6.38135e-05	1.38942	up	0.926817	0.0443643	normal
Panicum_miliaceum_newGene_4060	0.442945	0.23125	normal	0.552355	0.186	normal	0.00747939	0.635562	up	0.236795	0.434109	normal	0.940051	0.0406433	normal
Panicum_miliaceum_newGene_4070	0.89142	0.0643614	normal	0.81372	-0.109117	normal	0.185933	0.550014	normal	1.08563e-07	1.41581	up	0.278323	0.594909	normal
Panicum_miliaceum_newGene_4074	7.40229e-15	1.24866	up	9.24833e-24	1.83611	up	1.11926e-26	1.9455	up	2.11082e-07	1.24437	up	0.0144143	-0.67757	normal
Panicum_miliaceum_newGene_4109	--	--	--	--	--	--	--	--	--	--	--	--	2.33183e-26	4.22568	up
Panicum_miliaceum_newGene_4115	0.775464	-0.13407	normal	0.190933	-0.547889	normal	0.113059	-0.532561	normal	0.908302	-0.0410175	normal	0.00800262	1.11794	up
Panicum_miliaceum_newGene_4121	--	--	--	--	--	--	--	--	--	6.52026e-05	2.50794	up	--	--	--
Panicum_miliaceum_newGene_4126	0.13186	0.489669	normal	0.0190758	0.66411	normal	7.08996e-07	1.28217	up	0.000586735	0.980614	up	0.906002	0.09873	normal
Panicum_miliaceum_newGene_4136	0.653583	0.185506	normal	0.0014979	0.93307	up	1.45986e-07	1.36538	up	8.60104e-13	1.8935	up	0.117257	0.661764	normal
Panicum_miliaceum_newGene_414	6.43505e-09	1.84177	up	1.61072e-06	1.5948	up	1.4045e-11	2.0869	up	0.409473	0.404124	normal	0.768033	-0.174066	normal
Panicum_miliaceum_newGene_4193	0.316118	0.645518	normal	0.167999	0.748844	normal	0.00344961	1.35282	up	0.00960351	1.22925	up	0.111148	-1.22528	normal
Panicum_miliaceum_newGene_4217	0.0808997	0.587825	normal	0.0403602	0.83908	normal	0.000552267	1.04939	up	5.30648e-05	1.35045	up	0.932703	0.0487696	normal
Panicum_miliaceum_newGene_4225	--	--	--	--	--	--	--	--	--	--	--	--	3.27086e-08	3.01464	up
Panicum_miliaceum_newGene_4230	4.93462e-11	1.17619	up	2.96226e-12	1.18704	up	0.00298793	0.550626	normal	0.166784	0.296847	normal	4.41641e-07	1.08968	up
Panicum_miliaceum_newGene_4234	0.544786	0.332857	normal	0.60803	0.220369	normal	0.0432802	0.721002	normal	0.000108846	1.26747	up	0.906002	-0.09333	normal
Panicum_miliaceum_newGene_428	5.22974e-06	1.38993	up	8.20598e-07	1.51545	up	5.17452e-06	1.50174	up	0.000261963	1.37332	up	2.26681e-05	1.87905	up
Panicum_miliaceum_newGene_4293	--	--	--	--	--	--	--	--	--	--	--	--	1.12824e-07	2.86524	up
Panicum_miliaceum_newGene_4297	6.83006e-05	1.36137	up	2.17287e-09	1.89898	up	2.70095e-07	1.56239	up	0.000321957	1.21936	up	0.562676	-0.627456	normal
Panicum_miliaceum_newGene_4309	0.0777865	0.371421	normal	1.72396e-06	0.90235	up	3.10399e-11	1.23558	up	0.000366199	0.960575	up	0.235054	0.406425	normal
Panicum_miliaceum_newGene_4316	0.177298	0.875165	normal	6.42418e-07	1.1419	up	0.000179534	1.28925	up	0.905283	-0.0543292	normal	0.933972	-0.051768	normal
Panicum_miliaceum_newGene_4329	--	--	--	--	--	--	--	--	--	--	--	--	4.6913e-07	3.30087	up
Panicum_miliaceum_newGene_4342	0.572946	0.155083	normal	0.329555	0.222399	normal	0.310665	0.246287	normal	0.017292	0.503588	normal	0.000339252	0.980732	up
Panicum_miliaceum_newGene_4367	0.000101374	1.43965	up	0.0013133	1.7381	up	3.57815e-06	1.86577	up	7.85509e-22	3.00227	up	0.197094	1.14424	normal
Panicum_miliaceum_newGene_4409	0.00722708	0.98275	up	0.00971447	0.977028	up	0.310082	0.492751	normal	0.763526	-0.163626	normal	0.322659	-1.67969	normal
Panicum_miliaceum_newGene_4415	--	--	--	--	--	--	--	--	--	--	--	--	3.21725e-33	9.14269	up
Panicum_miliaceum_newGene_4438	0.00231996	0.680513	up	2.6617e-13	1.51098	up	9.99415e-20	1.80656	up	9.79276e-05	0.986572	up	0.0170327	0.675803	normal
Panicum_miliaceum_newGene_4454	0.699648	-0.138778	normal	0.921232	0.0301921	normal	0.0473884	0.502559	normal	0.00358157	0.737999	up	0.000158168	1.01311	up
Panicum_miliaceum_newGene_4457	0.909224	-0.0495822	normal	0.669327	0.157632	normal	0.000801388	0.901159	up	1.0144e-05	1.31184	up	0.970295	0.0294798	normal
Panicum_miliaceum_newGene_4463	1.43109e-06	-1.5293	down	8.3347e-10	-1.54537	down	0.119607	-0.436264	normal	0.000143859	1.46949	up	0.229761	0.452276	normal
Panicum_miliaceum_newGene_4466	0.685309	0.192844	normal	0.0109453	0.755382	normal	0.00181721	0.879219	up	0.00698741	0.902578	up	0.686658	-0.260312	normal
Panicum_miliaceum_newGene_4473	0.00174208	1.17082	up	1.20663e-13	2.38656	up	5.61722e-29	3.60164	up	8.39107e-22	3.83836	up	7.96153e-09	2.57267	up
Panicum_miliaceum_newGene_4474	--	--	--	0.00417235	5.07261	up	0.000914753	5.53671	up	0.000163676	6.75963	up	--	--	--
Panicum_miliaceum_newGene_4483	0.00120161	0.731406	up	8.14406e-10	1.46358	up	2.92288e-12	1.539	up	4.02791e-06	1.33828	up	0.0649945	-0.629838	normal
Panicum_miliaceum_newGene_4501	--	--	--	--	--	--	1.14961e-09	3.67981	up	--	--	--	--	--	--
Panicum_miliaceum_newGene_4502	0.132916	0.350457	normal	0.115668	0.261274	normal	0.0616095	0.375191	normal	0.000212886	0.689812	up	0.0710055	0.515374	normal
Panicum_miliaceum_newGene_4503	--	--	--	--	--	--	5.57631e-11	3.99192	up	--	--	--	--	--	--
Panicum_miliaceum_newGene_4504	--	--	--	--	--	--	6.29671e-12	3.52176	up	--	--	--	--	--	--
Panicum_miliaceum_newGene_4517	--	--	--	--	--	--	--	--	--	--	--	--	9.36252e-05	4.22837	up
Panicum_miliaceum_newGene_4577	0.139889	0.388668	normal	0.0485036	0.494578	normal	1.02792e-08	1.03138	up	0.0722685	0.605913	normal	0.00246972	-1.47846	down
Panicum_miliaceum_newGene_4585	0.0812777	0.574534	normal	0.179388	0.500786	normal	3.95729e-05	1.07451	up	0.00601931	0.842994	up	0.169749	-1.25426	normal
Panicum_miliaceum_newGene_4590	0.13714	0.486915	normal	0.165143	0.512648	normal	0.000260333	0.963946	up	0.0266788	0.799569	normal	0.012889	-1.67307	normal
Panicum_miliaceum_newGene_4594	0.966164	-0.014435	normal	0.263901	0.260207	normal	0.00155655	0.749827	up	0.00120937	0.881424	up	0.342615	0.316247	normal
Panicum_miliaceum_newGene_4620	0.600846	-0.199006	normal	0.654564	-0.157928	normal	0.726373	-0.124007	normal	0.0018094	0.901456	up	0.426208	0.279859	normal
Panicum_miliaceum_newGene_464	--	--	--	--	--	--	--	--	--	--	--	--	2.12087e-06	3.34919	up
Panicum_miliaceum_newGene_4640	0.000656797	0.392015	normal	1.78244e-06	0.57933	normal	5.48869e-09	0.783898	up	0.00703653	0.501651	normal	0.137613	-0.473419	normal
Panicum_miliaceum_newGene_4665	0.0895036	0.972106	normal	7.70822e-06	2.135	up	2.0718e-18	4.03986	up	1.38319e-38	5.83704	up	0.662513	0.40465	normal
Panicum_miliaceum_newGene_4668	--	--	--	--	--	--	--	--	--	--	--	--	1.24274e-08	8.25134	up
Panicum_miliaceum_newGene_4671	0.41275	0.199045	normal	0.0204638	0.441493	normal	4.67274e-05	0.682625	up	0.00238738	0.674842	up	0.654301	0.132219	normal
Panicum_miliaceum_newGene_4680	0.455184	0.290128	normal	0.00529127	0.790347	up	0.000118705	1.1805	up	5.2549e-08	1.43018	up	0.907323	0.0678326	normal
Panicum_miliaceum_newGene_4741	--	--	--	--	--	--	--	--	--	0.000283319	3.1845	up	--	--	--
Panicum_miliaceum_newGene_4745	0.0876474	0.957401	normal	9.39088e-06	2.08375	up	2.48605e-18	3.99587	up	8.63234e-39	5.78469	up	0.707498	0.34692	normal
Panicum_miliaceum_newGene_4766	--	--	--	1.78632e-12	2.99743	up	1.67795e-28	3.7957	up	1.4331e-10	2.9823	up	--	--	--
Panicum_miliaceum_newGene_4768	--	--	--	3.97047e-10	3.17835	up	6.17515e-16	3.67869	up	7.83152e-07	2.88822	up	--	--	--
Panicum_miliaceum_newGene_4793	1.01384e-06	2.67469	up	5.13007e-08	3.13885	up	5.3539e-16	3.8089	up	5.87267e-08	3.37317	up	--	--	--
Panicum_miliaceum_newGene_4795	6.0181e-10	1.89527	up	2.89714e-25	2.82408	up	2.26699e-51	3.4738	up	2.75424e-12	2.84762	up	0.0224486	1.05776	normal
Panicum_miliaceum_newGene_4799	1.16918e-09	2.06396	up	3.99249e-20	3.01844	up	2.13124e-55	3.68086	up	4.49212e-11	3.09802	up	0.00909776	1.25101	up
Panicum_miliaceum_newGene_4800	7.66551e-06	2.51025	up	2.09412e-08	3.12858	up	1.23302e-13	4.04339	up	5.41874e-08	3.40028	up	0.0329018	1.81139	normal
Panicum_miliaceum_newGene_4807	0.000532377	1.4145	up	0.0172682	1.25732	normal	0.0254627	1.13168	normal	0.889457	0.110951	normal	--	--	--
Panicum_miliaceum_newGene_4815	0.00323131	-0.634577	down	0.0123906	-0.654522	normal	3.47205e-06	-1.12195	down	0.0307735	-0.712028	normal	7.78462e-11	1.29024	up
Panicum_miliaceum_newGene_4823	0.151943	-0.415922	normal	0.888077	-0.0549972	normal	0.0950133	0.534481	normal	0.000886728	1.30093	up	0.000454997	-2.0882	down
Panicum_miliaceum_newGene_4834	6.70349e-05	1.84878	up	2.14217e-37	4.77433	up	4.10903e-38	5.36351	up	1.20747e-55	5.94384	up	0.984453	-0.0221714	normal
Panicum_miliaceum_newGene_4885	--	--	--	--	--	--	1.38008e-10	3.5898	up	--	--	--	--	--	--
Panicum_miliaceum_newGene_4886	0.922018	-0.0453363	normal	3.62203e-07	1.06769	up	1.28156e-11	1.35973	up	6.20564e-06	1.62517	up	0.0353178	0.780149	normal
Panicum_miliaceum_newGene_4914	0.857573	-0.497765	normal	0.893462	-0.321495	normal	0.930841	-0.181518	normal	0.717593	0.838958	normal	0.00594964	2.16071	up
Panicum_miliaceum_newGene_4935	2.2622e-22	4.84817	up	1.77342e-41	5.77659	up	1.9351e-46	5.94518	up	1.03726e-18	4.51364	up	5.44438e-34	6.27321	up
Panicum_miliaceum_newGene_4952	1.40884e-10	1.05245	up	7.506e-14	1.26455	up	3.13396e-22	1.59852	up	1.23243e-05	1.06305	up	0.00694222	0.786772	up
Panicum_miliaceum_newGene_4967	0.133438	0.711498	normal	0.00270282	1.02656	up	0.055589	0.651933	normal	0.0932411	0.632078	normal	0.0034628	-1.43445	down
Panicum_miliaceum_newGene_4981	--	--	--	--	--	--	--	--	--	--	--	--	0.00730442	2.39049	up
Panicum_miliaceum_newGene_4986	0.227472	-0.253999	normal	0.999147	0.000343948	normal	0.555658	0.140028	normal	1.1318e-05	0.817473	up	0.542374	0.255221	normal
Panicum_miliaceum_newGene_499	6.13366e-24	3.08478	up	3.07282e-30	3.68915	up	6.51763e-37	3.53195	up	2.12555e-09	2.26343	up	0.540052	-1.21036	normal
Panicum_miliaceum_newGene_5011	2.49167e-15	2.14539	up	2.68494e-09	1.65563	up	7.1732e-12	2.06677	up	0.00401595	0.917057	up	0.136533	-0.905279	normal
Panicum_miliaceum_newGene_5016	0.0755271	0.438753	normal	3.49587e-07	0.967467	up	2.89267e-11	1.36553	up	3.30692e-10	1.83757	up	0.00126588	-0.966416	down
Panicum_miliaceum_newGene_5021	4.298e-27	3.63168	up	1.29095e-106	5.57318	up	1.57741e-158	5.97543	up	9.97161e-68	5.54125	up	6.19398e-06	2.14714	up
Panicum_miliaceum_newGene_5024	0.476692	-0.240571	normal	0.739745	-0.110527	normal	0.00564658	0.663125	up	0.0494899	0.645739	normal	0.0330989	0.807366	normal
Panicum_miliaceum_newGene_5026	0.00519555	0.474212	normal	4.51399e-07	0.901003	up	1.73765e-15	1.41264	up	2.85917e-06	1.36783	up	0.564467	0.19962	normal
Panicum_miliaceum_newGene_5029	0.284915	-1.31884	normal	0.138833	-1.30827	normal	0.935023	0.0530239	normal	1.23664e-10	2.76189	up	0.748141	-0.281317	normal
Panicum_miliaceum_newGene_5031	0.00557184	2.05416	up	2.03264e-09	2.83157	up	6.78531e-07	3.40584	up	1.88632e-07	2.64608	up	0.244873	0.911095	normal
Panicum_miliaceum_newGene_5032	0.039354	0.504697	normal	5.27624e-07	0.969677	up	3.2598e-11	1.32505	up	3.5786e-12	1.59264	up	0.654502	0.210035	normal
Panicum_miliaceum_newGene_5040	0.000258612	0.637118	up	1.54898e-15	1.36989	up	1.76982e-26	1.7882	up	2.61866e-06	1.47748	up	8.13243e-05	1.08627	up
Panicum_miliaceum_newGene_5044	0.930495	-0.0313579	normal	0.517431	-0.261357	normal	0.0164673	-0.824121	normal	0.0687384	-0.68525	normal	0.000805781	0.91746	up
Panicum_miliaceum_newGene_5046	0.484771	0.179268	normal	0.000132692	0.742072	up	1.65496e-19	1.48998	up	0.00191449	1.02443	up	0.160172	-0.499325	normal
Panicum_miliaceum_newGene_5049	--	--	--	--	--	--	--	--	--	1.95115e-09	8.23453	up	--	--	--
Panicum_miliaceum_newGene_5066	1.06605e-13	2.05061	up	3.3335e-24	2.35145	up	1.03887e-30	2.64816	up	1.26662e-15	2.07156	up	5.46911e-05	-1.28519	down
Panicum_miliaceum_newGene_5075	0.239166	0.363819	normal	0.0173803	0.605224	normal	0.000857882	0.801382	up	0.109218	0.411353	normal	0.107911	-1.03306	normal
Panicum_miliaceum_newGene_508	0.624644	-0.219005	normal	0.108331	-0.572628	normal	0.737328	-0.121781	normal	0.349442	-0.358711	normal	0.00182144	1.05683	up
Panicum_miliaceum_newGene_5112	1.06873e-05	0.833665	up	4.57012e-07	0.859107	up	8.11544e-15	1.14267	up	0.0334776	0.675484	normal	0.431561	0.37695	normal
Panicum_miliaceum_newGene_5117	0.425841	0.313	normal	5.57792e-08	1.28234	up	1.83007e-14	1.58856	up	5.08626e-07	1.88241	up	0.848617	-0.126695	normal
Panicum_miliaceum_newGene_5131	2.50893e-07	1.29383	up	8.55217e-06	1.43225	up	1.18826e-07	1.36863	up	0.00305407	0.647081	up	0.0125512	1.83917	normal
Panicum_miliaceum_newGene_5159	0.0948651	-0.288257	normal	0.960984	-0.0106469	normal	0.0468161	0.341899	normal	0.00405001	0.641281	up	0.893106	0.0620973	normal
Panicum_miliaceum_newGene_5178	4.75426e-08	-0.996329	down	2.59601e-12	-1.63382	down	1.4944e-22	-1.81422	down	1.60124e-09	-1.43091	down	7.89812e-06	1.28992	up
Panicum_miliaceum_newGene_5180	0.493956	0.29938	normal	0.001601	0.960181	up	0.0257697	0.79051	normal	0.0210745	0.843312	normal	0.23648	0.70575	normal
Panicum_miliaceum_newGene_5187	--	--	--	--	--	--	--	--	--	--	--	--	3.96255e-09	5.0397	up
Panicum_miliaceum_newGene_5200	0.0683515	1.21455	normal	0.0338227	1.18577	normal	0.0011107	1.7615	up	0.068528	1.01717	normal	0.139995	1.16763	normal
Panicum_miliaceum_newGene_5201	0.354753	0.281582	normal	0.429686	0.181984	normal	9.02556e-05	0.606741	up	0.00130576	0.794194	up	9.49534e-05	1.05939	up
Panicum_miliaceum_newGene_5206	0.236942	0.353217	normal	0.0205003	0.437153	normal	0.00261028	0.664393	up	0.0509496	0.57437	normal	0.212501	0.454943	normal
Panicum_miliaceum_newGene_5208	0.560224	0.265204	normal	0.764836	-0.099176	normal	0.54871	0.222433	normal	0.000684817	1.37115	up	0.795536	0.148465	normal
Panicum_miliaceum_newGene_5211	0.0223222	-0.585535	normal	3.83636e-05	-0.84848	down	6.29144e-07	-1.12695	down	3.44028e-09	-1.20978	down	1.00194e-05	0.963484	up
Panicum_miliaceum_newGene_5221	0.11993	0.970412	normal	0.0210245	1.11327	normal	0.0319139	0.944191	normal	0.00176344	1.47759	up	0.621939	-0.798308	normal
Panicum_miliaceum_newGene_5227	0.0796071	0.348963	normal	1.36984e-08	1.15875	up	9.40171e-40	1.97971	up	6.06845e-32	2.43001	up	0.533355	0.262203	normal
Panicum_miliaceum_newGene_523	0.0657485	0.927504	normal	0.179453	0.712106	normal	0.892739	0.100963	normal	0.0327465	-1.02391	normal	3.45912e-17	3.47292	up
Panicum_miliaceum_newGene_5239	--	--	--	--	--	--	--	--	--	1.86645e-25	4.86669	up	--	--	--
Panicum_miliaceum_newGene_524	1.46556e-11	1.24806	up	9.10347e-22	1.55409	up	4.57003e-36	1.83144	up	3.73657e-08	1.47042	up	0.799889	0.102362	normal
Panicum_miliaceum_newGene_5245	--	--	--	--	--	--	--	--	--	0.00383714	1.29954	up	--	--	--
Panicum_miliaceum_newGene_5273	1.12444e-27	2.12194	up	4.71418e-34	2.34687	up	7.84152e-32	2.69526	up	1.0346e-10	1.96803	up	0.00501268	1.20416	up
Panicum_miliaceum_newGene_5275	0.071101	1.02915	normal	0.0233778	1.23519	normal	0.0118364	1.46701	normal	2.92125e-06	2.12379	up	0.329254	0.790524	normal
Panicum_miliaceum_newGene_5281	4.13588e-05	1.07893	up	2.38466e-08	1.36279	up	1.20933e-25	1.95557	up	0.012322	0.984363	normal	0.972055	0.0191485	normal
Panicum_miliaceum_newGene_5282	0.000231931	1.74482	up	8.74381e-07	2.28681	up	2.89692e-08	2.49438	up	--	--	--	--	--	--
Panicum_miliaceum_newGene_5290	0.310364	0.615438	normal	0.300189	-0.454743	normal	0.815519	0.103685	normal	0.791201	-0.165448	normal	0.00749986	1.59897	up
Panicum_miliaceum_newGene_5291	9.80036e-06	1.56027	up	0.000324873	1.43366	up	8.6958e-05	1.49092	up	0.0811073	1.17325	normal	0.849466	-0.234289	normal
Panicum_miliaceum_newGene_5296	0.280539	-0.23083	normal	0.0623298	-0.346801	normal	0.873927	0.0384635	normal	0.644938	0.0964214	normal	0.00843107	0.679932	up
Panicum_miliaceum_newGene_5327	0.0041745	1.1453	up	0.872199	0.0926989	normal	0.00208316	0.956474	up	0.011379	1.09117	normal	0.0655449	1.33316	normal
Panicum_miliaceum_newGene_5357	0.102199	-0.794725	normal	4.28334e-06	-3.01408	down	0.0884362	-0.999386	normal	0.00236807	1.2985	up	1.12824e-07	1.81976	up
Panicum_miliaceum_newGene_5374	0.0327918	0.473425	normal	0.00627687	0.668521	up	0.000502404	0.726416	up	0.0245115	0.494755	normal	0.553517	-0.24562	normal
Panicum_miliaceum_newGene_5393	0.18777	0.791662	normal	0.00153315	1.58172	up	0.0130893	2.25055	normal	0.000142454	2.49694	up	0.891752	-0.162762	normal
Panicum_miliaceum_newGene_5394	0.874414	-0.105191	normal	0.173536	0.58272	normal	0.107654	0.72404	normal	2.5182e-12	2.47414	up	0.0037709	1.56168	up
Panicum_miliaceum_newGene_5397	5.87197e-05	0.867417	up	3.35319e-19	1.70899	up	9.80889e-43	2.05414	up	2.02744e-08	1.43798	up	0.00219892	1.69124	up
Panicum_miliaceum_newGene_540	1.06044e-10	1.53871	up	6.00359e-17	2.09187	up	6.56852e-44	2.59017	up	2.23626e-80	3.2556	up	1.6568e-09	2.71258	up
Panicum_miliaceum_newGene_5413	3.38544e-07	1.94135	up	0.0572591	1.43465	normal	8.11525e-05	1.68638	up	--	--	--	--	--	--
Panicum_miliaceum_newGene_5416	0.000578096	0.602732	up	1.04033e-08	1.14216	up	3.9374e-09	1.20541	up	9.95491e-16	1.51892	up	0.614503	-0.171666	normal
Panicum_miliaceum_newGene_5421	4.51926e-05	0.610218	up	5.09022e-10	1.27351	up	3.18332e-44	1.7901	up	3.75893e-11	1.54107	up	0.139323	-0.377362	normal
Panicum_miliaceum_newGene_5427	0.577873	0.244066	normal	0.136922	0.359501	normal	1.06701e-08	1.15301	up	2.05989e-07	1.58416	up	8.59993e-36	2.69553	up
Panicum_miliaceum_newGene_5440	0.925403	-0.0701999	normal	0.886421	0.102186	normal	0.761061	0.159562	normal	0.771536	0.160495	normal	3.11717e-06	2.06755	up
Panicum_miliaceum_newGene_5447	0.137005	0.567149	normal	0.00765858	0.968539	up	0.00636455	0.891566	up	0.485459	-0.366884	normal	0.0086548	-3.17679	down
Panicum_miliaceum_newGene_5460	1.81296e-09	1.43087	up	2.49823e-18	2.0032	up	3.23818e-38	2.82481	up	7.01244e-12	2.53126	up	0.545604	0.388287	normal
Panicum_miliaceum_newGene_547	0.36943	-0.326606	normal	0.313807	0.31016	normal	0.000120943	1.07876	up	7.41942e-09	1.62715	up	0.113993	0.526889	normal
Panicum_miliaceum_newGene_549	0.00110287	0.77531	up	0.000483976	0.827521	up	3.4786e-05	1.03104	up	0.767688	-0.102058	normal	0.869781	-0.0959374	normal
Panicum_miliaceum_newGene_55	0.318742	0.180014	normal	0.0563209	0.295129	normal	4.72711e-07	0.934869	up	0.00511126	1.03145	up	0.967354	-0.0214941	normal
Panicum_miliaceum_newGene_5530	--	--	--	0.0161879	1.16669	normal	0.00741701	1.24133	up	1.25063e-09	2.29372	up	0.00188511	1.60597	up
Panicum_miliaceum_newGene_5533	0.352737	0.207425	normal	0.963612	0.0114578	normal	0.0112385	0.485044	normal	1.95115e-05	0.877475	up	0.242568	0.420152	normal
Panicum_miliaceum_newGene_5555	1.72166e-14	1.73893	up	4.84916e-28	2.11772	up	1.12141e-15	2.45546	up	0.00476827	0.9077	up	0.65087	-0.228478	normal
Panicum_miliaceum_newGene_5557	--	--	--	--	--	--	3.71109e-17	4.54443	up	--	--	--	--	--	--
Panicum_miliaceum_newGene_5564	0.297684	0.363536	normal	0.121083	0.42177	normal	0.0032272	0.875214	up	0.390071	0.294461	normal	0.738114	-0.173939	normal
Panicum_miliaceum_newGene_5569	0.746765	0.101665	normal	0.34455	-0.299517	normal	0.205125	-0.293074	normal	0.475254	0.285417	normal	2.80184e-06	1.26841	up
Panicum_miliaceum_newGene_5571	0.424458	0.308349	normal	0.00185471	0.942701	up	0.953741	0.0306087	normal	0.104255	-0.805479	normal	0.77148	0.400589	normal
Panicum_miliaceum_newGene_5573	0.0071495	0.508601	normal	2.28008e-07	0.914635	up	6.6022e-07	0.788119	up	1.56751e-05	0.959967	up	0.0692674	-0.824983	normal
Panicum_miliaceum_newGene_5585	--	--	--	--	--	--	3.23949e-07	2.283	up	8.79798e-09	3.05546	up	--	--	--
Panicum_miliaceum_newGene_5587	0.237119	-0.254026	normal	0.0054688	-0.561623	normal	0.00384595	-0.623987	down	0.45215	-0.152216	normal	2.2561e-08	1.26669	up
Panicum_miliaceum_newGene_5621	0.675151	-0.0690134	normal	0.962898	-0.00849127	normal	0.437198	-0.118483	normal	0.839141	0.0342024	normal	1.78995e-09	1.28436	up
Panicum_miliaceum_newGene_5636	0.0619936	1.81224	normal	0.00889074	2.22833	up	0.00332247	2.34518	up	0.000227131	3.16932	up	0.133923	1.20765	normal
Panicum_miliaceum_newGene_5647	0.84277	0.0847869	normal	0.730466	0.129713	normal	0.00745067	0.691356	up	0.00201227	0.756706	up	0.632481	-0.214257	normal
Panicum_miliaceum_newGene_5681	--	--	--	--	--	--	--	--	--	5.27263e-10	2.88749	up	--	--	--
Panicum_miliaceum_newGene_5685	0.0479678	0.716081	normal	0.00573532	0.941996	up	2.90967e-06	1.53063	up	9.64815e-05	1.31059	up	0.874798	-0.111127	normal
Panicum_miliaceum_newGene_569	--	--	--	--	--	--	0.000681617	1.56857	up	0.00053534	1.4985	up	--	--	--
Panicum_miliaceum_newGene_5701	4.48414e-21	3.35794	up	2.55473e-35	3.82164	up	3.57056e-40	4.45331	up	1.05502e-10	2.83946	up	0.464123	-0.521037	normal
Panicum_miliaceum_newGene_5705	0.472923	-0.338147	normal	0.489996	-0.34109	normal	0.220598	0.450581	normal	0.0687336	0.672207	normal	0.00361566	1.43948	up
Panicum_miliaceum_newGene_5727	0.629786	0.212979	normal	0.468087	0.269556	normal	0.000264513	1.00123	up	0.0740946	0.607624	normal	0.440826	0.412807	normal
Panicum_miliaceum_newGene_5728	0.72632	-0.106251	normal	0.0689118	0.408411	normal	0.000316907	0.743572	up	0.303478	0.274093	normal	0.081976	-0.577534	normal
Panicum_miliaceum_newGene_5740	0.000307082	1.0792	up	8.39281e-05	1.11467	up	0.0387455	0.649333	normal	0.284173	-0.439398	normal	0.0887919	-1.48225	normal
Panicum_miliaceum_newGene_5741	0.417265	0.922738	normal	0.109609	1.59063	normal	0.0154555	2.94566	normal	0.000172022	4.51435	up	--	--	--
Panicum_miliaceum_newGene_5793	--	--	--	0.526148	0.711472	normal	2.25805e-05	2.0253	up	0.00398764	1.70331	up	--	--	--
Panicum_miliaceum_newGene_584	0.00993316	1.50426	up	1.21566e-05	2.28809	up	1.10124e-05	2.44606	up	0.000598677	1.93677	up	--	--	--
Panicum_miliaceum_newGene_585	0.000473251	0.478108	normal	5.5984e-08	0.769493	up	0.152237	0.319848	normal	0.00697612	0.457199	normal	0.227625	-0.805385	normal
Panicum_miliaceum_newGene_5853	--	--	--	0.0244382	1.18106	normal	0.000198885	1.69776	up	--	--	--	0.032275	1.95408	normal
Panicum_miliaceum_newGene_5864	4.28372e-06	1.55072	up	5.94912e-17	2.39101	up	2.80648e-18	2.38212	up	0.00234472	1.09198	up	0.00110686	1.29423	up
Panicum_miliaceum_newGene_5876	0.0132319	0.516306	normal	0.0377994	0.582303	normal	0.0434878	0.540829	normal	0.000971304	0.738851	up	0.527673	-0.269841	normal
Panicum_miliaceum_newGene_5884	--	--	--	--	--	--	9.99366e-05	1.86124	up	--	--	--	--	--	--
Panicum_miliaceum_newGene_5916	0.00960309	0.867966	up	0.000627665	1.53722	up	1.35889e-10	2.02217	up	0.00226873	1.32017	up	0.28835	0.43774	normal
Panicum_miliaceum_newGene_592	0.00896358	0.798612	up	0.000160992	1.07244	up	3.25741e-12	1.88335	up	1.2238e-09	1.96356	up	0.235863	0.557708	normal
Panicum_miliaceum_newGene_5927	0.163085	0.299728	normal	3.71512e-08	1.07756	up	4.65449e-20	1.54043	up	9.04851e-05	1.49608	up	0.285558	-0.346887	normal
Panicum_miliaceum_newGene_5964	0.000136398	2.59275	up	3.03579e-05	3.03652	up	0.000222063	2.5123	up	8.11603e-13	5.32066	up	--	--	--
Panicum_miliaceum_newGene_5969	0.0669251	0.336691	normal	0.0016497	0.595288	up	0.000254806	0.757705	up	0.501586	0.22403	normal	0.843066	-0.0687943	normal
Panicum_miliaceum_newGene_5991	0.00231609	1.3901	up	1.32044e-06	2.01685	up	3.175e-08	2.18418	up	4.71301e-07	2.02692	up	--	--	--
Panicum_miliaceum_newGene_5995	0.746004	-0.267085	normal	0.656066	-0.308949	normal	0.121787	-0.817755	normal	0.393754	-0.525253	normal	0.00899191	1.5664	up
Panicum_miliaceum_newGene_6040	0.0254153	0.363135	normal	0.000426671	0.545576	normal	7.9505e-08	0.892929	up	0.040443	0.513714	normal	0.0157807	0.678318	normal
Panicum_miliaceum_newGene_6042	0.292761	0.566992	normal	0.99319	-0.00572007	normal	0.540949	0.274679	normal	0.510009	-0.354682	normal	1.91396e-09	2.36742	up
Panicum_miliaceum_newGene_6054	0.388697	0.352834	normal	0.832135	-0.108679	normal	0.899095	-0.0350468	normal	0.319255	0.371739	normal	0.000497476	0.910295	up
Panicum_miliaceum_newGene_6074	0.603392	0.252796	normal	0.952647	0.0354772	normal	0.941405	-0.0354692	normal	0.0195823	0.821731	normal	0.00382779	1.34579	up
Panicum_miliaceum_newGene_6087	7.85724e-11	5.25379	up	2.11365e-12	5.64035	up	1.11035e-17	6.08238	up	--	--	--	--	--	--
Panicum_miliaceum_newGene_6092	0.00969502	0.933519	up	0.610466	0.236821	normal	0.171643	0.568673	normal	0.333041	0.410529	normal	0.523671	0.386079	normal
Panicum_miliaceum_newGene_6099	0.643941	0.214599	normal	0.687236	0.156297	normal	0.899971	0.0617244	normal	0.230023	0.385828	normal	3.52388e-20	2.51603	up
Panicum_miliaceum_newGene_611	0.125493	-0.724972	normal	0.298433	-0.46978	normal	0.84075	-0.0709742	normal	0.00886695	0.649034	up	0.00431391	0.982553	up
Panicum_miliaceum_newGene_6141	0.356922	0.594228	normal	0.00808574	1.47214	up	6.04591e-13	2.4965	up	1.21922e-08	2.39153	up	--	--	--
Panicum_miliaceum_newGene_6142	2.31728e-07	0.927208	up	4.46068e-13	1.35191	up	1.28673e-10	1.2783	up	0.069957	0.51254	normal	0.421704	-0.519709	normal
Panicum_miliaceum_newGene_618	0.00862681	0.495274	normal	5.97354e-06	0.935578	up	7.21643e-14	1.14383	up	0.00363768	0.762305	up	0.832994	-0.062706	normal
Panicum_miliaceum_newGene_6180	0.212453	1.09721	normal	0.0153511	1.51928	normal	6.21937e-08	2.4978	up	0.000250487	2.66657	up	0.709181	0.462821	normal
Panicum_miliaceum_newGene_6185	0.187752	0.240778	normal	0.226606	0.196514	normal	0.568473	0.0968466	normal	0.00228892	0.722178	up	0.000665225	-0.551642	normal
Panicum_miliaceum_newGene_622	2.266e-07	0.784351	up	2.38921e-29	1.47081	up	2.70047e-31	1.58671	up	0.000594036	0.914853	up	0.0255339	0.342258	normal
Panicum_miliaceum_newGene_6265	0.450145	0.214142	normal	0.000208734	0.884346	up	5.08233e-21	1.38414	up	4.50393e-05	1.30832	up	0.03427	0.459588	normal
Panicum_miliaceum_newGene_6284	0.337355	0.234253	normal	0.00118859	0.730311	up	5.24641e-08	1.03905	up	6.77349e-05	1.29382	up	0.430433	0.326511	normal
Panicum_miliaceum_newGene_6304	0.510848	1.72889	normal	0.196129	2.98814	normal	0.655828	0.832888	normal	0.00193808	5.03943	up	0.821743	-0.641038	normal
Panicum_miliaceum_newGene_636	0.38607	0.31616	normal	0.000275281	1.14888	up	0.179386	0.490524	normal	0.392559	-0.41058	normal	0.148262	-0.878445	normal
Panicum_miliaceum_newGene_637	0.00575156	0.960604	up	7.20741e-09	1.75415	up	3.01205e-05	1.31019	up	1.96274e-08	1.7562	up	0.100992	-1.64531	normal
Panicum_miliaceum_newGene_6401	0.769505	-0.153878	normal	0.535407	-0.360053	normal	0.793398	-0.122875	normal	0.360793	0.353038	normal	5.18815e-06	1.64828	up
Panicum_miliaceum_newGene_6408	--	--	--	--	--	--	--	--	--	--	--	--	4.94608e-07	4.14484	up
Panicum_miliaceum_newGene_6413	--	--	--	--	--	--	9.75699e-06	2.31328	up	--	--	--	--	--	--
Panicum_miliaceum_newGene_6418	--	--	--	3.23877e-05	2.47063	up	1.45581e-07	2.96494	up	0.000111381	2.38663	up	--	--	--
Panicum_miliaceum_newGene_6449	9.91172e-11	1.44129	up	0.000112248	1.0407	up	1.83249e-09	1.72552	up	0.579151	0.204209	normal	0.091168	-0.727495	normal
Panicum_miliaceum_newGene_646	0.888341	-0.0423989	normal	0.030865	-0.387475	normal	0.0765389	-0.323748	normal	0.805971	0.0658818	normal	0.002086	0.668095	up
Panicum_miliaceum_newGene_6469	8.26394e-06	0.699112	up	1.48153e-19	1.36479	up	7.99926e-27	1.74872	up	6.25581e-23	1.66661	up	0.903655	-0.0332067	normal
Panicum_miliaceum_newGene_651	0.802105	0.0833668	normal	0.000215589	0.895992	up	3.941e-09	1.4086	up	0.0292259	1.09095	normal	2.8944e-20	2.06964	up
Panicum_miliaceum_newGene_6534	9.08355e-10	0.976217	up	1.88793e-25	1.44323	up	9.90897e-44	1.93909	up	3.34955e-12	1.79571	up	0.0240671	0.747074	normal
Panicum_miliaceum_newGene_6561	--	--	--	--	--	--	--	--	--	--	--	--	1.39274e-13	4.43536	up
Panicum_miliaceum_newGene_659	--	--	--	0.0154308	1.47643	normal	1.27969e-05	2.00426	up	0.0348315	1.38492	normal	--	--	--
Panicum_miliaceum_newGene_6599	0.605606	-0.322443	normal	0.120163	0.692024	normal	3.3734e-07	1.71567	up	1.71476e-07	1.84384	up	0.210743	-0.909243	normal
Panicum_miliaceum_newGene_6600	0.000667061	0.939995	up	0.0187658	0.837455	normal	0.00258285	0.733398	up	0.032131	-0.742173	normal	0.743113	0.171059	normal
Panicum_miliaceum_newGene_6602	0.0217404	0.472571	normal	0.00530502	0.558981	normal	2.38303e-09	1.04852	up	3.60472e-06	1.23858	up	0.950793	-0.022988	normal
Panicum_miliaceum_newGene_6603	0.026461	0.568178	normal	0.0217653	0.601766	normal	0.00160907	0.84259	up	0.00220001	0.821451	up	0.997206	0.00183189	normal
Panicum_miliaceum_newGene_662	0.443889	0.20512	normal	0.0149208	0.562775	normal	7.53696e-05	0.8735	up	0.000475415	0.977812	up	0.137524	0.52804	normal
Panicum_miliaceum_newGene_6627	--	--	--	--	--	--	--	--	--	--	--	--	0.00016364	2.38861	up
Panicum_miliaceum_newGene_663	0.720596	0.185968	normal	0.947859	-0.0333433	normal	0.738617	0.141886	normal	0.158661	0.616169	normal	0.00571756	1.18582	up
Panicum_miliaceum_newGene_6653	0.128627	0.572406	normal	3.55421e-09	1.9627	up	7.9346e-12	2.51796	up	1.32826e-06	2.10637	up	0.939045	-0.0888331	normal
Panicum_miliaceum_newGene_6656	0.829443	0.15895	normal	0.0376972	1.06249	normal	0.00340728	1.33837	up	0.00257429	1.28326	up	0.818342	0.271064	normal
Panicum_miliaceum_newGene_6663	0.575175	0.211174	normal	0.00434397	0.670333	up	6.15974e-16	1.48473	up	2.17095e-06	1.63316	up	0.0400994	-0.68092	normal
Panicum_miliaceum_newGene_6678	0.0341329	0.531323	normal	3.71083e-10	1.35654	up	7.45739e-17	1.87568	up	0.000296238	1.36655	up	0.0812975	0.545187	normal
Panicum_miliaceum_newGene_6688	0.096226	0.334994	normal	0.000144746	0.626363	up	0.0396851	0.462088	normal	0.000794978	0.754225	up	0.361266	0.359722	normal
Panicum_miliaceum_newGene_6695	0.0399221	-0.694641	normal	0.000431774	-1.01501	down	0.000699727	-0.918518	down	0.735409	-0.0964727	normal	0.000265202	1.20728	up
Panicum_miliaceum_newGene_670	0.000772341	0.555763	normal	0.0731578	0.338337	normal	0.00250575	0.557874	normal	0.0012201	0.658435	up	0.715051	0.124052	normal
Panicum_miliaceum_newGene_6706	0.498959	0.123486	normal	0.00122188	0.535945	normal	0.000333681	0.601882	up	0.251535	0.197594	normal	0.322064	-0.250731	normal
Panicum_miliaceum_newGene_6719	0.0418014	0.485799	normal	0.0428262	0.447597	normal	3.44123e-05	0.911611	up	0.0104854	0.783067	normal	0.919249	0.0844829	normal
Panicum_miliaceum_newGene_6726	0.171916	0.28073	normal	0.12203	0.310113	normal	0.000671323	0.607577	up	9.29306e-05	0.75853	up	0.441834	0.289863	normal
Panicum_miliaceum_newGene_6727	0.00964577	0.553658	normal	0.0134861	0.631889	normal	8.4741e-05	0.813454	up	0.205172	0.419127	normal	0.168789	0.433696	normal
Panicum_miliaceum_newGene_6732	5.89871e-10	1.24926	up	1.75474e-11	1.50525	up	9.74615e-21	2.14919	up	0.000205214	1.40429	up	0.538335	-0.205608	normal
Panicum_miliaceum_newGene_6746	--	--	--	--	--	--	3.46362e-05	1.86316	up	0.000491965	1.67759	up	0.0472323	1.24294	normal
Panicum_miliaceum_newGene_6750	0.0230341	0.380175	normal	1.08383e-11	1.04924	up	6.95605e-14	1.40096	up	8.92252e-12	1.5176	up	0.0037059	0.539702	normal
Panicum_miliaceum_newGene_6752	0.169904	0.241005	normal	0.0103282	0.412198	normal	8.86913e-07	0.806581	up	0.154207	0.37537	normal	0.232207	0.251973	normal
Panicum_miliaceum_newGene_6754	0.832922	0.140402	normal	1.22679e-05	1.73069	up	5.31038e-19	3.41398	up	2.12113e-37	5.35607	up	0.000388957	2.14829	up
Panicum_miliaceum_newGene_6760	2.68677e-05	1.92808	up	1.91157e-14	3.63738	up	1.2974e-39	5.31524	up	1.35298e-40	6.34721	up	0.0159767	1.56596	normal
Panicum_miliaceum_newGene_679	0.0286644	-0.444389	normal	0.0356645	-0.470318	normal	0.408407	-0.183535	normal	0.642858	-0.15059	normal	1.06961e-25	1.91549	up
Panicum_miliaceum_newGene_6791	0.229497	0.52812	normal	0.00501946	1.07166	up	0.0646533	0.667215	normal	0.736574	0.189963	normal	0.0969276	-1.03279	normal
Panicum_miliaceum_newGene_6800	--	--	--	--	--	--	--	--	--	--	--	--	0.00998012	1.88347	up
Panicum_miliaceum_newGene_6807	0.627385	0.31357	normal	0.207364	0.889863	normal	0.915036	0.0817446	normal	3.45953e-05	1.73645	up	0.970619	-0.0565079	normal
Panicum_miliaceum_newGene_6844	0.399004	0.216235	normal	0.168024	0.346535	normal	0.00398456	0.682736	up	0.0283187	0.625083	normal	0.453962	0.260688	normal
Panicum_miliaceum_newGene_6845	0.000299047	0.491252	normal	3.36422e-05	0.572863	normal	4.37082e-05	0.659543	up	0.0168268	0.452327	normal	0.0622512	0.524053	normal
Panicum_miliaceum_newGene_6855	0.522563	0.306676	normal	0.0345603	0.720701	normal	7.46844e-06	1.2617	up	6.41853e-10	1.9284	up	0.358048	0.501605	normal
Panicum_miliaceum_newGene_6856	0.277646	0.344597	normal	0.0859234	0.549494	normal	0.0883475	0.500666	normal	0.000829301	1.05183	up	0.866358	-0.0945568	normal
Panicum_miliaceum_newGene_6858	0.228209	0.575115	normal	0.0858798	0.760454	normal	0.0411986	0.914475	normal	0.000589088	1.25733	up	0.957445	-0.0510622	normal
Panicum_miliaceum_newGene_6860	0.148025	0.346222	normal	0.0529517	0.37267	normal	0.416672	0.154149	normal	0.23011	-0.309009	normal	3.57442e-05	1.07479	up
Panicum_miliaceum_newGene_6874	0.114446	-0.449065	normal	0.0256794	-0.61549	normal	0.0582322	0.394719	normal	0.00156388	0.791771	up	0.0707725	-0.513909	normal
Panicum_miliaceum_newGene_6877	0.963073	-0.0235422	normal	0.193058	0.508791	normal	0.000470169	1.02731	up	0.258781	0.440387	normal	0.568549	0.341616	normal
Panicum_miliaceum_newGene_6879	0.0657754	0.506664	normal	0.00986472	0.706551	up	1.37817e-07	1.28921	up	0.00598966	0.93421	up	0.14715	0.528954	normal
Panicum_miliaceum_newGene_6882	1.77332e-05	1.17955	up	2.02474e-07	1.4454	up	5.91412e-08	1.47944	up	0.011341	0.790373	normal	0.383697	-0.447562	normal
Panicum_miliaceum_newGene_6892	1.02285e-09	1.44846	up	1.01801e-07	1.42063	up	1.63661e-07	1.2749	up	1.70168e-07	1.75453	up	0.626947	-0.335303	normal
Panicum_miliaceum_newGene_6893	--	--	--	3.89286e-13	3.74607	up	4.05338e-24	4.20673	up	2.41839e-12	3.80056	up	0.0705231	2.08615	normal
Panicum_miliaceum_newGene_6896	0.964793	0.0144984	normal	0.796521	0.0926935	normal	0.000503864	0.731958	up	9.84439e-05	1.12075	up	0.118877	0.527132	normal
Panicum_miliaceum_newGene_6901	0.36876	-0.383783	normal	0.902059	-0.0568861	normal	0.884256	-0.0644122	normal	0.00627941	0.930419	up	0.626733	0.236389	normal
Panicum_miliaceum_newGene_6906	0.0159396	0.617215	normal	0.31754	0.414944	normal	0.0079576	0.674714	up	0.254569	0.427316	normal	0.190451	-0.484159	normal
Panicum_miliaceum_newGene_6941	--	--	--	--	--	--	--	--	--	--	--	--	4.10365e-19	5.30064	up
Panicum_miliaceum_newGene_696	1.65313e-06	0.575708	normal	1.00289e-12	1.13651	up	1.08481e-20	1.43989	up	4.04001e-05	0.841225	up	0.0819234	0.302336	normal
Panicum_miliaceum_newGene_6989	0.623354	0.0954047	normal	0.411102	-0.176756	normal	2.13588e-06	0.768105	up	0.001627	1.06997	up	0.00940609	0.709691	up
Panicum_miliaceum_newGene_6990	0.855339	0.132486	normal	0.0684469	0.946909	normal	0.0960554	0.70745	normal	3.0093e-07	1.72665	up	0.95546	0.083246	normal
Panicum_miliaceum_newGene_7024	0.0319575	0.304928	normal	2.50526e-07	0.721989	up	6.80261e-08	1.07815	up	0.0109134	0.891297	normal	0.167682	-0.38128	normal
Panicum_miliaceum_newGene_7025	6.1305e-08	1.2162	up	1.37361e-09	1.79017	up	8.35673e-11	1.822	up	0.000192405	1.40079	up	0.700993	-0.202664	normal
Panicum_miliaceum_newGene_7029	0.267328	-0.769579	normal	0.363952	-0.497012	normal	0.0891702	-0.903244	normal	0.092138	-0.846871	normal	4.11891e-11	2.68137	up
Panicum_miliaceum_newGene_703	0.00569749	0.782648	up	3.06879e-13	1.83235	up	5.41676e-09	1.68335	up	3.69683e-09	1.76351	up	0.951481	0.0737556	normal
Panicum_miliaceum_newGene_7034	0.535589	0.262582	normal	0.0705002	0.703042	normal	0.000205052	1.0942	up	0.00142679	1.06565	up	0.464736	0.433226	normal
Panicum_miliaceum_newGene_7037	0.357374	-0.347344	normal	0.434528	0.250578	normal	0.00032785	0.910683	up	0.722537	0.227199	normal	0.0764795	0.680552	normal
Panicum_miliaceum_newGene_7039	0.0241835	0.461133	normal	7.61848e-11	0.93312	up	2.58143e-23	1.37431	up	0.000109244	1.19614	up	0.122128	0.494202	normal
Panicum_miliaceum_newGene_7048	0.000770108	1.22825	up	0.00483822	1.23219	up	1.93209e-12	2.05172	up	2.26132e-09	2.0257	up	0.534268	0.530189	normal
Panicum_miliaceum_newGene_708	0.000545522	0.906365	up	1.16735e-12	1.46856	up	1.01674e-10	1.31266	up	6.58972e-05	0.908478	up	0.786506	0.107364	normal
Panicum_miliaceum_newGene_7110	0.152497	0.372575	normal	8.18505e-12	1.63761	up	4.58085e-18	1.87215	up	1.07761e-06	1.5631	up	6.73886e-05	1.11	up
Panicum_miliaceum_newGene_7143	4.02034e-08	2.34079	up	1.88062e-17	3.1344	up	1.14907e-32	3.96088	up	2.48507e-12	3.37126	up	0.0405994	1.22831	normal
Panicum_miliaceum_newGene_7144	--	--	--	4.96942e-13	3.73732	up	8.93884e-17	4.07668	up	1.75572e-08	3.52955	up	--	--	--
Panicum_miliaceum_newGene_716	7.46406e-10	1.2397	up	3.22484e-25	2.15382	up	4.67306e-39	2.13768	up	9.60789e-07	1.17213	up	0.318319	0.312043	normal
Panicum_miliaceum_newGene_7161	0.129028	-0.346175	normal	0.424557	-0.195688	normal	0.29017	0.247707	normal	0.00235034	0.744882	up	0.235061	-0.419798	normal
Panicum_miliaceum_newGene_717	--	--	--	--	--	--	--	--	--	--	--	--	6.90916e-07	3.28357	up
Panicum_miliaceum_newGene_7172	0.431908	0.35246	normal	0.0569836	0.767961	normal	0.00912352	0.928077	up	0.0484272	0.700675	normal	0.572354	0.321594	normal
Panicum_miliaceum_newGene_7175	0.738829	-0.104495	normal	0.811518	-0.0893575	normal	0.0795153	0.384158	normal	0.00123027	0.893315	up	0.0823249	0.689332	normal
Panicum_miliaceum_newGene_7179	2.99606e-07	2.1786	up	1.50967e-18	3.05486	up	1.17188e-38	3.8401	up	2.86427e-12	3.15169	up	0.110213	1.12824	normal
Panicum_miliaceum_newGene_7187	0.565327	0.280651	normal	0.0601927	0.743562	normal	0.0182656	0.82051	normal	0.0393081	0.894218	normal	0.00348799	1.09509	up
Panicum_miliaceum_newGene_720	0.54761	-0.226803	normal	0.0555858	0.515373	normal	0.00214057	0.816738	up	0.365514	-0.435289	normal	0.0785701	-0.760168	normal
Panicum_miliaceum_newGene_7201	0.000844028	-1.54853	down	6.282e-05	-2.02515	down	4.31881e-05	-1.99268	down	0.459213	0.342117	normal	2.38055e-05	1.12218	up
Panicum_miliaceum_newGene_7218	0.111922	-0.310165	normal	0.116293	-0.332603	normal	0.414408	-0.155793	normal	0.437509	-0.208684	normal	0.000494341	0.884062	up
Panicum_miliaceum_newGene_7256	--	--	--	--	--	--	--	--	--	3.4518e-07	2.79864	up	--	--	--
Panicum_miliaceum_newGene_7263	0.203516	-0.552479	normal	0.336875	0.305877	normal	0.0589619	0.537573	normal	4.68464e-06	1.17427	up	0.748454	0.144017	normal
Panicum_miliaceum_newGene_7275	9.84717e-08	1.33539	up	2.80114e-16	2.05699	up	7.05012e-21	2.39415	up	9.77575e-06	1.43212	up	0.235334	0.701194	normal
Panicum_miliaceum_newGene_7277	1.47772e-10	0.830242	up	5.63314e-12	1.03188	up	1.40311e-29	1.45798	up	6.9122e-07	1.31699	up	0.881137	0.0616361	normal
Panicum_miliaceum_newGene_729	0.0186672	0.45191	normal	1.02898e-07	0.851436	up	2.20941e-16	1.29875	up	0.000812963	1.07512	up	0.00297463	0.757026	up
Panicum_miliaceum_newGene_730	0.723701	-0.104001	normal	0.301285	0.203927	normal	0.000401807	0.821072	up	0.00189179	0.99162	up	0.120186	0.550606	normal
Panicum_miliaceum_newGene_7306	0.0594463	0.441479	normal	0.0145186	0.564416	normal	0.00434939	0.636164	up	0.000584522	0.775464	up	0.0131149	1.23845	normal
Panicum_miliaceum_newGene_7319	0.00109982	0.641563	up	0.000118138	0.754915	up	1.72318e-12	1.33467	up	3.12557e-10	1.83597	up	0.629342	0.244986	normal
Panicum_miliaceum_newGene_7331	0.700786	-0.0801588	normal	0.176064	0.23118	normal	0.000985645	0.573627	normal	7.91376e-07	0.812576	up	0.0187155	0.422088	normal
Panicum_miliaceum_newGene_7333	1.03755e-05	1.05733	up	3.62982e-20	1.90607	up	2.17146e-12	2.04203	up	2.78661e-17	2.28917	up	0.00219451	1.07586	up
Panicum_miliaceum_newGene_7347	0.000143479	1.0739	up	5.0411e-19	2.23949	up	2.05051e-15	2.97048	up	1.51453e-36	3.43594	up	0.911952	-0.0820249	normal
Panicum_miliaceum_newGene_7348	0.00158899	1.09849	up	1.48353e-19	2.51034	up	4.10424e-12	2.30165	up	8.20438e-12	2.40213	up	0.10926	-1.90803	normal
Panicum_miliaceum_newGene_7349	3.39477e-12	2.60289	up	1.24549e-30	3.79029	up	1.81084e-37	3.82612	up	5.76882e-16	3.20481	up	0.9974	-0.00283391	normal
Panicum_miliaceum_newGene_7350	7.07934e-05	1.8556	up	7.80061e-21	3.95147	up	1.97083e-39	4.7672	up	5.21304e-52	5.67006	up	0.26226	-0.875624	normal
Panicum_miliaceum_newGene_7354	0.473143	0.240656	normal	0.144097	0.379186	normal	2.22266e-08	1.0423	up	0.0653171	0.736866	normal	5.14162e-08	-1.45752	down
Panicum_miliaceum_newGene_7377	0.00158726	0.642563	up	2.16097e-07	1.01201	up	4.3125e-15	1.56182	up	0.00535565	0.937342	up	0.606892	-0.206932	normal
Panicum_miliaceum_newGene_7381	1.27911e-18	1.40034	up	2.34147e-44	2.08564	up	2.11082e-38	2.25705	up	2.90098e-31	2.47655	up	0.357207	-0.311943	normal
Panicum_miliaceum_newGene_7390	0.22129	-0.684201	normal	0.837443	-0.177897	normal	0.312953	0.455498	normal	1.14807e-07	1.74275	up	0.105001	1.04649	normal
Panicum_miliaceum_newGene_7399	2.60372e-11	1.13486	up	5.15287e-12	1.31451	up	5.19427e-13	1.31404	up	5.10613e-09	1.20608	up	0.0953553	-0.632413	normal
Panicum_miliaceum_newGene_7403	--	--	--	--	--	--	--	--	--	1.22854e-06	2.55863	up	--	--	--
Panicum_miliaceum_newGene_7414	--	--	--	--	--	--	0.00104689	2.0441	up	--	--	--	--	--	--
Panicum_miliaceum_newGene_7417	0.116719	-0.34388	normal	0.00587572	-0.565503	normal	0.0271311	-0.484608	normal	0.86369	0.0563685	normal	1.13829e-05	1.46537	up
Panicum_miliaceum_newGene_7420	--	--	--	--	--	--	--	--	--	--	--	--	0.00356416	1.80461	up
Panicum_miliaceum_newGene_745	0.0544575	0.41161	normal	0.0104162	0.600937	normal	2.00407e-07	1.06697	up	0.529907	0.28389	normal	0.0569309	0.95118	normal
Panicum_miliaceum_newGene_7450	0.0283956	0.506414	normal	0.00013719	0.825424	up	0.000416618	0.604408	up	0.864497	0.0602965	normal	0.39057	-0.365209	normal
Panicum_miliaceum_newGene_7456	1.34796e-06	1.77058	up	0.000331125	1.6505	up	2.82848e-36	3.12276	up	1.18132e-23	3.04581	up	0.0958878	0.938579	normal
Panicum_miliaceum_newGene_7458	0.2492	0.221566	normal	0.485471	0.146137	normal	0.129584	0.310832	normal	0.0591773	0.406053	normal	0.000468276	1.11405	up
Panicum_miliaceum_newGene_7476	0.0514411	0.58912	normal	0.0162273	0.601364	normal	0.00539527	0.729716	up	0.98091	-0.00948269	normal	0.112245	0.673937	normal
Panicum_miliaceum_newGene_748	0.694947	-0.0995406	normal	0.761589	0.0633196	normal	5.34678e-05	0.712702	up	0.000594666	0.800804	up	0.0122183	0.745332	normal
Panicum_miliaceum_newGene_7499	--	--	--	--	--	--	--	--	--	3.03432e-14	9.89114	up	--	--	--
Panicum_miliaceum_newGene_7503	0.137651	0.379018	normal	0.0933047	0.440817	normal	0.00010061	0.78382	up	2.05908e-08	1.20686	up	0.0972482	0.622523	normal
Panicum_miliaceum_newGene_7513	--	--	--	1.40488e-08	4.446	up	0.000926293	5.46215	up	--	--	--	--	--	--
Panicum_miliaceum_newGene_7525	0.0149216	0.673245	normal	0.0038769	0.682727	up	2.39458e-07	1.15925	up	0.000165173	1.20324	up	0.721075	0.176189	normal
Panicum_miliaceum_newGene_7538	0.033143	0.438997	normal	1.64817e-05	0.982603	up	0.0113818	0.68251	normal	0.921315	0.0266756	normal	0.94738	-0.132277	normal
Panicum_miliaceum_newGene_7546	0.0346858	0.77767	normal	8.1797e-07	1.77918	up	8.85071e-09	1.74786	up	0.000173842	1.47979	up	0.684097	-0.474154	normal
Panicum_miliaceum_newGene_7563	0.746758	-0.0934717	normal	0.632795	0.120727	normal	0.15519	0.320829	normal	0.00490703	0.780657	up	0.0336608	-0.770719	normal
Panicum_miliaceum_newGene_7573	0.0801931	0.297769	normal	4.73218e-05	0.608528	up	0.00214198	0.471103	normal	0.00128532	0.508008	normal	0.764282	0.0721114	normal
Panicum_miliaceum_newGene_758	0.085921	0.911863	normal	6.05296e-05	1.89514	up	0.00264194	1.38553	up	0.0120803	1.27792	normal	0.204176	0.944984	normal
Panicum_miliaceum_newGene_7593	0.614335	0.136545	normal	0.668154	0.0940996	normal	0.0390398	0.492396	normal	0.00472331	0.596079	up	0.619865	0.186524	normal
Panicum_miliaceum_newGene_7595	1.45862e-23	3.16355	up	2.73929e-23	3.31015	up	1.68553e-23	3.1397	up	1.80867e-10	2.44776	up	0.000312049	1.66036	up
Panicum_miliaceum_newGene_7597	0.284329	0.445969	normal	0.832436	0.106289	normal	0.915563	-0.0546147	normal	0.0636829	0.703228	normal	0.00748759	0.974503	up
Panicum_miliaceum_newGene_7598	0.855702	0.0854528	normal	8.4465e-12	1.54221	up	6.16115e-21	2.71158	up	1.9447e-07	1.25889	up	0.351594	0.584731	normal
Panicum_miliaceum_newGene_7600	0.55463	0.200204	normal	0.89851	-0.0450851	normal	0.00143837	0.82473	up	0.0865864	0.503579	normal	0.00738928	1.1294	up
Panicum_miliaceum_newGene_7606	0.107461	1.37646	normal	0.0206283	1.6371	normal	0.92106	-0.0667274	normal	0.390789	0.746569	normal	1.19109e-69	7.69402	up
Panicum_miliaceum_newGene_7618	0.144856	-0.353805	normal	0.0162503	0.719122	normal	2.53108e-08	1.15002	up	0.000352531	0.918471	up	0.116651	-1.2298	normal
Panicum_miliaceum_newGene_7619	2.42911e-05	0.778003	up	1.77892e-22	1.63462	up	6.67849e-55	2.38876	up	8.02824e-16	2.35133	up	0.000141945	0.907162	up
Panicum_miliaceum_newGene_7627	0.0635846	0.453981	normal	4.10158e-07	1.01844	up	7.42374e-13	1.54841	up	1.32523e-05	1.35653	up	0.113516	0.367742	normal
Panicum_miliaceum_newGene_7635	2.96291e-36	3.40896	up	4.7189e-96	5.09499	up	6.15842e-154	5.95094	up	4.72955e-60	5.65451	up	2.47905e-14	2.7117	up
Panicum_miliaceum_newGene_7638	0.743071	-0.0978575	normal	0.829606	-0.0705532	normal	0.652886	0.129687	normal	0.00123129	0.689324	up	0.185827	0.414808	normal
Panicum_miliaceum_newGene_7640	7.53848e-08	1.26615	up	1.59489e-18	1.82222	up	1.42385e-40	2.33106	up	3.37643e-19	2.52373	up	0.0381582	-1.05556	normal
Panicum_miliaceum_newGene_765	0.466016	0.291727	normal	0.521039	0.215779	normal	0.564621	-0.245684	normal	0.672633	-0.166915	normal	0.00638597	0.895119	up
Panicum_miliaceum_newGene_7669	0.0700301	2.04526	normal	0.0569587	1.24345	normal	1.41957e-05	2.28423	up	9.94709e-06	2.35397	up	0.153037	1.24406	normal
Panicum_miliaceum_newGene_7679	0.233172	0.783074	normal	0.0888284	1.06414	normal	0.00146194	1.63465	up	0.0441715	1.33995	normal	0.704068	0.398059	normal
Panicum_miliaceum_newGene_7690	1.37777e-10	0.860279	up	1.35865e-18	1.21919	up	5.60215e-44	1.83712	up	4.30749e-09	1.48749	up	0.147549	0.509999	normal
Panicum_miliaceum_newGene_7711	0.00515959	1.23324	up	1.03002e-06	1.69088	up	7.15461e-31	2.91567	up	3.69597e-10	2.14844	up	0.418348	-0.919112	normal
Panicum_miliaceum_newGene_772	0.00777176	0.367006	normal	6.04182e-08	0.633213	up	2.3731e-13	1.10238	up	1.17018e-11	1.14141	up	0.0779669	0.584783	normal
Panicum_miliaceum_newGene_7727	--	--	--	0.00026765	2.14267	up	1.72374e-09	2.7712	up	--	--	--	--	--	--
Panicum_miliaceum_newGene_7730	0.504897	-0.354919	normal	0.159277	0.692665	normal	1.17742e-08	1.65337	up	0.00131668	1.53004	up	0.00208098	-1.49924	down
Panicum_miliaceum_newGene_7737	0.96406	0.0225566	normal	0.409494	0.296556	normal	0.147575	0.441801	normal	0.0971551	0.643288	normal	3.08625e-09	1.55996	up
Panicum_miliaceum_newGene_774	0.846809	-0.0755532	normal	1.06384e-15	1.53813	up	1.7943e-15	1.42394	up	3.28181e-08	2.08296	up	0.00185148	0.929766	up
Panicum_miliaceum_newGene_7740	0.0316534	0.383683	normal	2.54267e-07	0.817734	up	3.23637e-11	1.08629	up	6.35787e-06	0.911917	up	7.53372e-05	0.801144	up
Panicum_miliaceum_newGene_7746	0.0032689	0.793304	up	0.0163558	0.634279	normal	0.000702832	1.01082	up	0.00020316	0.931627	up	0.140351	0.681505	normal
Panicum_miliaceum_newGene_7755	0.639123	-0.249208	normal	0.00107083	0.955794	up	1.00523e-06	1.61731	up	3.22098e-08	1.54343	up	0.552558	0.583625	normal
Panicum_miliaceum_newGene_7765	0.674986	0.128489	normal	0.000514298	0.646392	up	0.00626238	0.598596	up	0.0116061	0.433122	normal	0.35012	-0.491633	normal
Panicum_miliaceum_newGene_7803	0.0215302	1.09676	normal	0.000910133	1.31038	up	1.3246e-06	1.58391	up	0.00205126	1.07415	up	4.75994e-06	2.04351	up
Panicum_miliaceum_newGene_7810	0.0867817	1.05603	normal	0.120087	1.03929	normal	0.0119939	1.33676	normal	0.000276624	1.91677	up	0.611913	0.628185	normal
Panicum_miliaceum_newGene_7815	0.243955	0.226609	normal	0.0921455	0.293303	normal	0.048257	0.368689	normal	8.62265e-08	0.87283	up	0.984926	0.00800376	normal
Panicum_miliaceum_newGene_7822	0.520737	0.139894	normal	0.07165	0.289204	normal	0.000143472	0.587713	up	2.19495e-08	0.923412	up	0.0170348	0.594367	normal
Panicum_miliaceum_newGene_7824	1.22226e-05	0.893575	up	2.92781e-09	1.30827	up	2.9152e-11	1.35943	up	0.048395	0.611327	normal	0.633145	0.186063	normal
Panicum_miliaceum_newGene_7828	4.40546e-09	1.00451	up	9.86798e-19	1.47787	up	2.45283e-23	2.18212	up	1.01963e-07	1.49567	up	2.3266e-05	1.2591	up
Panicum_miliaceum_newGene_784	0.00504985	1.86728	up	0.0238596	1.81253	normal	0.000780153	2.08321	up	0.392208	0.808701	normal	0.892109	-0.212129	normal
Panicum_miliaceum_newGene_7841	0.00238311	0.872405	up	5.03441e-05	1.1115	up	3.10858e-09	1.65424	up	0.00505929	0.915151	up	0.763917	0.148019	normal
Panicum_miliaceum_newGene_7842	2.83735e-08	1.6319	up	2.03259e-12	2.32673	up	1.11433e-17	2.6136	up	0.00151327	1.09084	up	0.673106	-0.232803	normal
Panicum_miliaceum_newGene_7859	0.557849	-0.368907	normal	0.451233	-0.490165	normal	0.000198268	-2.05626	down	0.0771912	-0.833934	normal	5.95558e-16	3.39468	up
Panicum_miliaceum_newGene_786	0.103588	0.380473	normal	0.000568054	0.681747	up	6.38165e-08	1.26775	up	0.0035647	0.980708	up	0.418553	0.325123	normal
Panicum_miliaceum_newGene_7880	0.000173808	1.04217	up	2.6075e-12	1.52078	up	1.0405e-14	1.75607	up	2.67005e-14	1.64995	up	0.354559	0.340834	normal
Panicum_miliaceum_newGene_7881	--	--	--	8.3836e-09	4.69432	up	5.20638e-12	5.13059	up	4.01947e-08	4.72785	up	--	--	--
Panicum_miliaceum_newGene_7894	0.823717	0.143281	normal	0.931606	0.0485869	normal	0.756825	0.149441	normal	0.0109704	-1.29161	normal	1.56875e-11	2.44191	up
Panicum_miliaceum_newGene_7895	--	--	--	--	--	--	0.000521578	1.8114	up	0.00224136	1.6573	up	--	--	--
Panicum_miliaceum_newGene_7897	1.65636e-12	1.0006	up	3.89449e-12	1.06961	up	6.12946e-32	1.52805	up	3.71019e-05	1.18015	up	0.969721	0.0256246	normal
Panicum_miliaceum_newGene_7914	0.0181629	0.481305	normal	3.98752e-06	0.978315	up	1.76607e-13	1.44862	up	2.97036e-08	1.43492	up	0.967518	0.0167581	normal
Panicum_miliaceum_newGene_7946	0.000979289	1.09286	up	9.37271e-14	1.66921	up	7.10166e-14	1.98427	up	0.00385663	1.1588	up	0.429585	-0.376276	normal
Panicum_miliaceum_newGene_7962	4.1341e-17	1.87537	up	1.55264e-28	2.57697	up	7.45586e-39	2.51574	up	2.80414e-09	1.71916	up	0.0898088	-0.501185	normal
Panicum_miliaceum_newGene_7976	2.23102e-05	0.790359	up	4.32895e-07	1.14361	up	4.19247e-10	1.35994	up	2.15198e-15	1.62258	up	0.610799	0.239758	normal
Panicum_miliaceum_newGene_8014	0.00308988	2.00291	up	2.21767e-17	2.81241	up	3.9015e-13	3.10725	up	7.24328e-10	2.49356	up	--	--	--
Panicum_miliaceum_newGene_8027	0.492866	-0.161183	normal	0.337338	-0.235844	normal	0.0475548	0.43318	normal	0.00108072	0.788269	up	0.112518	0.502387	normal
Panicum_miliaceum_newGene_8036	1.20834e-12	2.71989	up	2.13177e-18	3.18697	up	1.23975e-31	3.19877	up	2.82811e-08	2.03672	up	0.452487	0.687034	normal
Panicum_miliaceum_newGene_8038	0.819038	-0.0628373	normal	0.00319359	0.500255	normal	1.25277e-08	0.877873	up	1.95476e-06	1.21897	up	0.00337868	1.13865	up
Panicum_miliaceum_newGene_8058	1.1403e-06	3.12841	up	1.11628e-27	5.06884	up	2.17306e-48	5.88261	up	1.88473e-11	4.7061	up	--	--	--
Panicum_miliaceum_newGene_8059	--	--	--	0.00162972	5.80703	up	0.000115529	6.97711	up	0.0135308	5.22515	normal	--	--	--
Panicum_miliaceum_newGene_806	3.73627e-05	0.602023	up	3.85486e-23	1.27866	up	6.72956e-42	1.73289	up	3.63807e-15	1.57172	up	0.428154	0.158065	normal
Panicum_miliaceum_newGene_8060	--	--	--	5.54199e-12	9.05143	up	7.13445e-14	9.70385	up	--	--	--	--	--	--
Panicum_miliaceum_newGene_8069	0.371007	-0.389658	normal	0.199396	0.364343	normal	0.00566349	0.6461	up	0.439147	0.307347	normal	0.233705	-0.592786	normal
Panicum_miliaceum_newGene_8090	0.455583	-0.245014	normal	0.667161	-0.157848	normal	0.0364454	0.615407	normal	0.000233589	1.14107	up	0.756959	0.150566	normal
Panicum_miliaceum_newGene_81	0.00365093	1.39622	up	0.035432	1.21139	normal	0.0120029	1.44892	normal	0.000408939	1.79034	up	0.583595	0.501408	normal
Panicum_miliaceum_newGene_8107	3.79624e-12	1.53445	up	7.54171e-12	1.54635	up	2.53191e-17	1.77166	up	0.00181119	0.825215	up	0.528562	0.22546	normal
Panicum_miliaceum_newGene_813	6.13667e-05	0.825554	up	5.84746e-06	1.01202	up	0.000468458	0.750763	up	3.53215e-05	0.902081	up	0.780615	-0.133838	normal
Panicum_miliaceum_newGene_8139	--	--	--	3.96297e-10	7.20562	up	--	--	--	--	--	--	--	--	--
Panicum_miliaceum_newGene_8151	0.126801	-0.304751	normal	0.653226	0.0984381	normal	0.000778489	0.602899	up	3.60826e-05	0.937994	up	0.723662	0.116582	normal
Panicum_miliaceum_newGene_8187	--	--	--	--	--	--	4.92055e-11	4.23817	up	5.8284e-11	4.77622	up	--	--	--
Panicum_miliaceum_newGene_8198	0.00195166	1.37707	up	--	--	--	--	--	--	--	--	--	--	--	--
Panicum_miliaceum_newGene_8201	0.0297717	0.506187	normal	0.0102512	0.572978	normal	5.72844e-15	1.17622	up	0.00454422	1.01903	up	0.00111716	1.15686	up
Panicum_miliaceum_newGene_8203	0.0675738	0.684295	normal	0.0535153	0.844823	normal	0.00709431	1.01303	up	0.115979	-0.655183	normal	0.00166966	-1.98101	down
Panicum_miliaceum_newGene_8205	2.2509e-08	2.50158	up	6.55554e-09	2.88907	up	3.9356e-13	2.93837	up	--	--	--	--	--	--
Panicum_miliaceum_newGene_8206	0.00186117	0.763051	up	0.00542872	0.629073	up	1.2369e-09	1.29861	up	1.60743e-05	1.11239	up	0.936576	-0.0491071	normal
Panicum_miliaceum_newGene_8238	0.250779	0.649632	normal	0.00171313	1.3877	up	0.0498166	0.901048	normal	0.0130005	1.15903	normal	0.776973	-0.252226	normal
Panicum_miliaceum_newGene_8239	0.626289	0.179067	normal	0.20064	0.381648	normal	0.0124195	0.656182	normal	0.00193769	0.797452	up	0.00243998	1.097	up
Panicum_miliaceum_newGene_8245	0.532686	0.502422	normal	--	--	--	--	--	--	0.000556973	1.75497	up	0.388458	0.731223	normal
Panicum_miliaceum_newGene_8271	0.827334	0.0994031	normal	0.0916219	0.561339	normal	0.435937	0.30392	normal	0.00556845	0.878466	up	0.194903	-0.769465	normal
Panicum_miliaceum_newGene_8280	4.52514e-09	1.19705	up	3.67116e-46	2.20939	up	2.25228e-58	2.60519	up	1.03864e-13	2.05981	up	6.08786e-06	1.34	up
Panicum_miliaceum_newGene_8281	0.00157558	0.555832	normal	3.93488e-12	1.2304	up	2.64425e-17	1.48669	up	0.0035846	0.749685	up	0.0185757	-0.493621	normal
Panicum_miliaceum_newGene_8288	0.000222443	0.560096	normal	2.58161e-06	0.798415	up	6.92422e-06	0.828088	up	0.964633	0.019175	normal	0.999013	0.000449996	normal
Panicum_miliaceum_newGene_8299	0.215083	-0.38743	normal	0.156769	-0.448107	normal	0.433792	0.223593	normal	0.000178177	1.00879	up	0.983132	0.0112991	normal
Panicum_miliaceum_newGene_831	0.000177004	1.76842	up	2.84668e-11	2.74358	up	2.79449e-19	2.91737	up	4.55355e-17	2.938	up	--	--	--
Panicum_miliaceum_newGene_8337	0.727882	0.168928	normal	0.0223407	0.615767	normal	0.127167	0.505106	normal	0.000919014	0.843308	up	0.837407	0.122214	normal
Panicum_miliaceum_newGene_834	0.016618	0.585584	normal	0.135653	0.369209	normal	0.177673	0.402437	normal	0.86807	0.0518966	normal	0.000121368	1.37052	up
Panicum_miliaceum_newGene_8350	0.000693595	0.594329	up	2.47412e-07	0.977052	up	3.94352e-23	1.38718	up	2.70514e-10	1.84005	up	0.00986292	0.81681	up
Panicum_miliaceum_newGene_8358	0.0205828	0.52642	normal	0.000109431	0.91129	up	4.49998e-08	1.17966	up	0.0012114	0.924199	up	0.985374	-0.0105404	normal
Panicum_miliaceum_newGene_8364	0.573216	-0.248377	normal	0.898957	-0.0585953	normal	0.0370223	0.692468	normal	0.00103531	0.94919	up	0.559542	-0.259067	normal
Panicum_miliaceum_newGene_8368	2.98718e-11	2.97781	up	9.45758e-14	3.38066	up	--	--	--	--	--	--	--	--	--
Panicum_miliaceum_newGene_8380	--	--	--	--	--	--	--	--	--	--	--	--	6.29612e-06	1.97944	up
Panicum_miliaceum_newGene_8398	--	--	--	--	--	--	--	--	--	2.90307e-05	2.07137	up	0.0720344	1.1428	normal
Panicum_miliaceum_newGene_8402	0.0717452	0.575966	normal	0.00284117	0.884457	up	0.00436663	1.00403	up	0.0279269	0.890664	normal	0.943611	-0.0551011	normal
Panicum_miliaceum_newGene_8404	0.0179808	0.859408	normal	1.77806e-05	1.52746	up	2.31681e-10	1.75215	up	1.68095e-05	1.7229	up	0.932277	0.063593	normal
Panicum_miliaceum_newGene_8408	0.15431	0.750279	normal	0.67264	-0.229905	normal	0.251216	-0.529225	normal	0.00015917	1.82181	up	0.429004	-0.516265	normal
Panicum_miliaceum_newGene_8410	2.15875e-08	2.46394	up	1.00627e-20	3.25633	up	8.50597e-17	3.16026	up	2.8271e-12	2.72964	up	2.22922e-07	3.15953	up
Panicum_miliaceum_newGene_8419	0.0974789	0.668655	normal	1.33092e-05	1.47542	up	3.63231e-12	2.07299	up	0.038703	0.899048	normal	0.0119673	1.07227	normal
Panicum_miliaceum_newGene_8429	0.195216	0.400833	normal	0.0109158	0.771985	normal	0.000142092	0.964404	up	0.31349	0.352393	normal	0.0155078	0.891122	normal
Panicum_miliaceum_newGene_8465	0.813998	0.171955	normal	0.256767	0.82053	normal	0.355318	0.483202	normal	0.00340268	1.58168	up	0.767332	0.233899	normal
Panicum_miliaceum_newGene_8503	2.96539e-17	3.25892	up	1.44498e-33	4.14571	up	5.05798e-58	4.98924	up	5.33567e-26	4.52959	up	0.0403094	1.79475	normal
Panicum_miliaceum_newGene_8504	0.000766823	2.24347	up	--	--	--	5.37386e-09	3.36735	up	1.17573e-08	3.11779	up	--	--	--
Panicum_miliaceum_newGene_8514	2.65325e-14	1.58742	up	1.15619e-26	2.27608	up	4.41185e-55	2.13687	up	0.00113828	1.08081	up	0.0307116	-1.00453	normal
Panicum_miliaceum_newGene_8515	2.58111e-15	3.22325	up	3.40754e-30	4.13741	up	1.43057e-52	4.97199	up	2.70891e-23	4.29051	up	0.0513882	1.79802	normal
Panicum_miliaceum_newGene_8516	6.24144e-09	4.0296	up	1.12175e-13	4.88095	up	1.22421e-18	5.39498	up	9.38464e-13	4.71138	up	--	--	--
Panicum_miliaceum_newGene_8522	5.81718e-23	3.31623	up	6.8301e-44	4.35214	up	4.27748e-50	4.51044	up	3.79827e-18	3.32781	up	0.0393082	1.2791	normal
Panicum_miliaceum_newGene_8562	1.64383e-13	3.33602	up	2.40584e-18	4.29359	up	1.2398e-28	4.89831	up	3.05842e-15	3.97431	up	0.63914	0.568743	normal
Panicum_miliaceum_newGene_8566	0.858372	-0.146473	normal	0.710155	0.266576	normal	0.131784	0.85011	normal	7.59378e-06	1.8518	up	0.0906725	1.04201	normal
Panicum_miliaceum_newGene_8573	0.0248728	0.619038	normal	0.000115599	0.748355	up	6.57436e-06	1.29333	up	0.00132838	0.843685	up	0.439695	0.298841	normal
Panicum_miliaceum_newGene_8575	0.685164	-0.21447	normal	0.944662	-0.0276922	normal	0.508922	0.217274	normal	0.00692071	0.722384	up	0.840748	0.110757	normal
Panicum_miliaceum_newGene_8614	0.000167934	0.682129	up	9.23599e-08	0.95966	up	8.13673e-07	0.819287	up	0.499574	0.158682	normal	0.226959	-0.258825	normal
Panicum_miliaceum_newGene_8615	0.0382723	0.746223	normal	0.0135236	0.904327	normal	0.000132737	1.35422	up	0.000103471	1.51085	up	0.548815	-0.56986	normal
Panicum_miliaceum_newGene_8629	0.746004	0.31329	normal	0.105101	2.60036	normal	0.0915145	1.04647	normal	6.3954e-17	4.57468	up	0.379032	-0.706613	normal
Panicum_miliaceum_newGene_8645	4.92805e-05	0.668052	up	2.39621e-07	1.01947	up	1.19159e-06	1.00108	up	0.160518	-0.577982	normal	0.320928	-0.456179	normal
Panicum_miliaceum_newGene_8664	0.0703801	0.806962	normal	0.0154647	1.09529	normal	6.11805e-05	1.5609	up	0.0334641	1.00952	normal	0.242708	0.689733	normal
Panicum_miliaceum_newGene_8689	0.000528934	0.707331	up	2.87879e-24	1.74429	up	3.30693e-36	2.37597	up	7.73446e-29	2.35499	up	0.916082	0.0461189	normal
Panicum_miliaceum_newGene_8691	0.0211775	0.456279	normal	0.344435	0.221402	normal	0.0744509	0.569031	normal	0.00743786	0.593352	up	0.43722	0.558132	normal
Panicum_miliaceum_newGene_870	0.0244203	0.525537	normal	1.51166e-06	0.954689	up	3.09751e-07	1.08748	up	3.7269e-08	1.20684	up	0.922481	0.0417636	normal
Panicum_miliaceum_newGene_8729	--	--	--	0.00915613	1.5355	up	--	--	--	--	--	--	--	--	--
Panicum_miliaceum_newGene_8740	--	--	--	--	--	--	--	--	--	5.40738e-11	4.75896	up	--	--	--
Panicum_miliaceum_newGene_8743	0.867327	-0.0487032	normal	0.987455	0.0053802	normal	0.0459896	0.361375	normal	0.00211644	0.607361	up	0.249251	0.423581	normal
Panicum_miliaceum_newGene_8771	0.107438	-0.38791	normal	0.027917	-0.649333	normal	0.904202	0.0373278	normal	0.0263056	0.60258	normal	5.57051e-05	1.13438	up
Panicum_miliaceum_newGene_8776	0.0626601	0.360067	normal	0.00417496	0.713384	up	1.2294e-11	1.22125	up	0.00582434	0.906014	up	0.251436	-0.469287	normal
Panicum_miliaceum_newGene_8780	0.287831	0.626401	normal	0.0312567	1.07232	normal	0.00101536	1.5097	up	0.00639872	1.50358	up	0.425987	0.6283	normal
Panicum_miliaceum_newGene_88	0.0207115	-0.86139	normal	0.00172609	-1.53308	down	0.0151072	-1.25396	normal	0.0108007	-1.09083	normal	0.00304515	1.05981	up
Panicum_miliaceum_newGene_8802	0.511803	-0.427588	normal	0.612736	-0.343522	normal	0.00185409	-1.01772	down	0.000293707	1.37177	up	0.769943	0.291499	normal
Panicum_miliaceum_newGene_8864	0.00122742	1.12063	up	0.0303345	1.19434	normal	9.65534e-17	2.27777	up	4.17709e-17	2.93046	up	0.931718	0.0850394	normal
Panicum_miliaceum_newGene_8897	--	--	--	--	--	--	--	--	--	--	--	--	3.07384e-06	6.45969	up
Panicum_miliaceum_newGene_8929	0.651488	-0.128187	normal	0.986295	0.00502963	normal	0.0325686	0.514727	normal	0.00281518	0.738996	up	0.700468	0.198014	normal
Panicum_miliaceum_newGene_8944	9.81292e-06	2.32099	up	1.04393e-13	3.33596	up	4.28555e-23	3.92513	up	5.2946e-08	3.29057	up	--	--	--
Panicum_miliaceum_newGene_8978	0.179403	0.445343	normal	0.0657344	0.584458	normal	0.00823051	0.833349	up	9.84944e-06	1.26468	up	0.439458	-0.393827	normal
Panicum_miliaceum_newGene_8995	0.000113794	1.79203	up	1.79853e-08	2.54422	up	1.49817e-17	3.17195	up	5.2477e-08	2.64525	up	--	--	--
Panicum_miliaceum_newGene_8996	--	--	--	--	--	--	1.13912e-14	3.78182	up	--	--	--	--	--	--
Panicum_miliaceum_newGene_8997	1.30672e-05	2.10487	up	7.10219e-16	3.21584	up	2.38358e-28	3.79871	up	1.57283e-10	3.21565	up	0.106734	1.37065	normal
Panicum_miliaceum_newGene_8998	--	--	--	--	--	--	2.86859e-13	4.17924	up	--	--	--	--	--	--
Panicum_miliaceum_newGene_9011	1.24222e-05	2.3982	up	1.49734e-11	3.11413	up	7.94738e-21	3.88144	up	1.08718e-08	3.17491	up	--	--	--
Panicum_miliaceum_newGene_9012	--	--	--	8.48413e-08	3.95702	up	8.24625e-10	4.29374	up	--	--	--	--	--	--
Panicum_miliaceum_newGene_9016	5.58252e-08	0.91972	up	1.44524e-28	1.7788	up	3.93384e-35	2.43305	up	3.47983e-10	2.03037	up	0.00348868	0.680962	up
Panicum_miliaceum_newGene_903	0.369238	0.284063	normal	0.767449	0.0956788	normal	0.0550153	0.545638	normal	0.691192	0.16498	normal	3.20197e-07	1.56706	up
Panicum_miliaceum_newGene_9041	--	--	--	--	--	--	7.90431e-14	4.30572	up	--	--	--	--	--	--
Panicum_miliaceum_newGene_9043	0.788254	0.236043	normal	--	--	--	0.678741	0.280704	normal	--	--	--	1.93632e-05	2.35596	up
Panicum_miliaceum_newGene_9054	2.34268e-05	1.11491	up	3.08283e-19	1.76813	up	1.34473e-28	2.05598	up	0.000261748	1.11676	up	0.965449	-0.0226767	normal
Panicum_miliaceum_newGene_9062	--	--	--	3.49577e-09	2.99672	up	1.90701e-13	3.958	up	2.83208e-12	3.39013	up	--	--	--
Panicum_miliaceum_newGene_9064	5.80334e-05	1.88942	up	2.46965e-13	2.80146	up	6.76784e-28	3.47246	up	9.7845e-11	3.02649	up	0.0109637	1.37187	normal
Panicum_miliaceum_newGene_9124	5.80334e-05	0.714646	up	0.000167177	0.706324	up	2.05116e-05	0.876733	up	0.787666	0.0800169	normal	0.130412	0.410018	normal
Panicum_miliaceum_newGene_913	0.0169854	-0.72818	normal	0.000126304	-1.00804	down	0.106418	-0.589518	normal	0.144877	-0.462326	normal	0.00752086	0.861015	up
Panicum_miliaceum_newGene_9131	0.0429967	0.42042	normal	9.75887e-05	0.877162	up	2.89885e-12	1.45827	up	0.0173769	0.81507	normal	0.762025	0.130565	normal
Panicum_miliaceum_newGene_916	0.97563	-0.0135093	normal	0.688613	0.150378	normal	0.00349588	0.949159	up	0.127746	0.874788	normal	0.992726	-0.00815489	normal
Panicum_miliaceum_newGene_9164	--	--	--	--	--	--	--	--	--	--	--	--	4.35162e-11	6.08597	up
Panicum_miliaceum_newGene_9173	0.956144	-0.0141092	normal	0.595705	0.133143	normal	0.00120785	0.534432	normal	0.00764933	0.788573	up	0.166745	0.353921	normal
Panicum_miliaceum_newGene_9174	0.910501	-0.0345843	normal	0.866057	-0.04381	normal	0.065368	0.363049	normal	0.00601892	0.855113	up	0.302117	0.43246	normal
Panicum_miliaceum_newGene_9176	0.890193	0.0953906	normal	0.560194	-0.247857	normal	0.0723592	0.615276	normal	0.000505883	1.34279	up	0.165832	0.651434	normal
Panicum_miliaceum_newGene_9188	0.478695	0.212348	normal	0.572744	0.17266	normal	0.000907149	0.870167	up	0.0398132	0.706242	normal	0.0500158	-0.784172	normal
Panicum_miliaceum_newGene_92	1.21585e-21	1.94664	up	0.000181186	1.31289	up	1.75671e-19	1.93191	up	0.00028567	1.18916	up	0.93236	-0.106235	normal
Panicum_miliaceum_newGene_9235	0.604085	0.159069	normal	0.724347	-0.125273	normal	0.477574	0.193744	normal	0.00445045	0.694452	up	0.533801	0.262693	normal
Panicum_miliaceum_newGene_9246	0.25546	-0.281264	normal	0.0239224	0.441329	normal	0.00276742	0.576712	normal	7.67412e-08	1.35981	up	0.411157	0.301853	normal
Panicum_miliaceum_newGene_925	4.44456e-05	2.25306	up	1.71727e-13	3.38449	up	4.17072e-28	3.95615	up	3.46866e-12	3.2168	up	0.0106042	1.80456	normal
Panicum_miliaceum_newGene_9260	4.90851e-11	2.61578	up	5.34643e-10	2.7125	up	2.12325e-12	2.83441	up	0.131168	0.709815	normal	0.000467577	2.05576	up
Panicum_miliaceum_newGene_9299	0.091562	0.547265	normal	0.000147884	1.00327	up	0.0185194	0.648742	normal	0.97542	0.013893	normal	0.0581045	1.02146	normal
Panicum_miliaceum_newGene_9303	5.15177e-24	3.18562	up	2.71704e-51	4.36632	up	6.75178e-60	4.56989	up	8.67484e-22	3.39151	up	0.0819198	1.08847	normal
Panicum_miliaceum_newGene_9305	5.37888e-31	3.15506	up	8.84773e-66	4.3606	up	1.13062e-51	4.56007	up	6.17304e-21	3.20916	up	0.302117	0.840552	normal
Panicum_miliaceum_newGene_9317	0.0148935	1.05947	normal	4.17767e-08	1.74094	up	1.93763e-06	1.69809	up	1.02614e-06	2.37837	up	0.815812	0.590713	normal
Panicum_miliaceum_newGene_9322	4.55822e-20	1.34314	up	1.67079e-31	1.80188	up	1.69112e-34	1.73191	up	0.0991499	0.491963	normal	0.393165	0.307693	normal
Panicum_miliaceum_newGene_9324	0.400967	0.173354	normal	0.349613	0.160514	normal	0.00181468	0.564961	normal	2.40075e-06	0.816594	up	0.00108983	0.616222	up
Panicum_miliaceum_newGene_9325	0.0161467	0.379695	normal	0.00261531	0.455211	normal	2.22768e-05	0.690431	up	9.91827e-09	1.00545	up	0.881246	0.0610381	normal
Panicum_miliaceum_newGene_9328	0.919325	-0.036572	normal	0.310648	-0.275976	normal	0.230428	0.313951	normal	0.917422	0.0474859	normal	3.35813e-06	1.94865	up
Panicum_miliaceum_newGene_9343	0.0124605	0.555017	normal	0.00064921	0.93074	up	0.00385466	0.637927	up	0.505259	0.18552	normal	0.804289	-0.118172	normal
Panicum_miliaceum_newGene_9349	0.224947	0.23419	normal	0.303147	0.192967	normal	2.00327e-05	0.676514	up	0.00298575	0.852469	up	0.787533	-0.0787689	normal
Panicum_miliaceum_newGene_9355	0.966527	-0.0330824	normal	0.892518	-0.0849096	normal	0.391154	0.450317	normal	0.00433142	1.37059	up	2.17191e-35	4.448	up
Panicum_miliaceum_newGene_9364	0.904225	0.0640505	normal	0.789758	0.0975592	normal	0.589844	-0.194429	normal	0.975563	0.0133961	normal	0.000871846	1.2469	up
Panicum_miliaceum_newGene_9368	0.0647474	0.618678	normal	0.587164	0.227181	normal	0.00517444	0.897436	up	0.156648	0.640481	normal	0.0482586	-1.74808	normal
Panicum_miliaceum_newGene_9381	--	--	--	--	--	--	--	--	--	--	--	--	0.000181279	2.95241	up
Panicum_miliaceum_newGene_9387	7.62916e-13	1.88249	up	1.40136e-19	2.41641	up	2.4726e-36	3.15545	up	1.61033e-15	2.76224	up	0.131293	1.19795	normal
Panicum_miliaceum_newGene_9404	0.027912	0.330904	normal	0.00060821	0.638629	up	0.183616	0.307035	normal	0.107786	0.348003	normal	0.342694	0.305344	normal
Panicum_miliaceum_newGene_9415	0.00669615	0.882373	up	0.0524265	0.614635	normal	0.0906968	0.589692	normal	0.0177617	1.07721	normal	0.904171	-0.0755404	normal
Panicum_miliaceum_newGene_9418	--	--	--	1.88007e-07	3.14078	up	7.31314e-12	3.39504	up	1.94042e-05	2.89476	up	--	--	--
Panicum_miliaceum_newGene_9431	--	--	--	--	--	--	1.03802e-11	4.08629	up	--	--	--	--	--	--
Panicum_miliaceum_newGene_9436	0.831761	-0.137261	normal	0.385953	0.413855	normal	0.00359269	1.03028	up	0.0303582	0.962548	normal	0.134208	0.699339	normal
Panicum_miliaceum_newGene_9444	0.613141	0.178947	normal	0.0104571	0.673225	normal	0.140352	0.477852	normal	2.88264e-05	1.04657	up	0.66991	0.241864	normal
Panicum_miliaceum_newGene_9456	0.917288	0.0475909	normal	0.775911	0.118404	normal	0.186238	0.41742	normal	0.0134631	0.831273	normal	5.4607e-05	1.19203	up
Panicum_miliaceum_newGene_9472	1.31165e-08	3.37902	up	1.60084e-08	3.5916	up	5.72969e-06	3.96668	up	1.44268e-05	3.02604	up	0.000279881	2.92647	up
Panicum_miliaceum_newGene_9487	0.222887	0.63522	normal	0.0526682	0.979006	normal	0.00183083	1.22685	up	0.0101587	1.1873	normal	0.98163	-0.0214474	normal
Panicum_miliaceum_newGene_9497	0.000182701	1.72065	up	0.000856215	1.8883	up	7.82559e-08	1.87828	up	8.63115e-05	1.49505	up	0.167633	1.09502	normal
Panicum_miliaceum_newGene_9597	0.425838	0.240243	normal	0.945798	0.0260645	normal	0.151695	0.358383	normal	5.61117e-06	1.01986	up	0.04249	0.846633	normal
Panicum_miliaceum_newGene_9620	0.522964	0.316961	normal	0.000736926	1.10094	up	1.16617e-07	1.71831	up	3.64037e-14	2.25868	up	0.690986	-0.251567	normal
Panicum_miliaceum_newGene_9630	0.212873	0.669315	normal	0.0011845	1.27009	up	3.10827e-07	1.81604	up	0.000230983	1.49764	up	0.0032842	1.68456	up
Panicum_miliaceum_newGene_9659	0.0864219	0.553882	normal	0.0652037	0.687744	normal	0.00431434	0.814095	up	0.0135638	0.596577	normal	0.000977376	1.41942	up
Panicum_miliaceum_newGene_9676	0.777103	0.101446	normal	0.713334	-0.127565	normal	0.576868	0.167892	normal	0.00167404	-1.22014	down	8.93266e-07	1.74049	up
Panicum_miliaceum_newGene_968	0.804467	-0.0790108	normal	0.307736	0.236177	normal	2.36195e-05	0.866691	up	0.00191976	0.803396	up	0.198662	0.486788	normal
Panicum_miliaceum_newGene_9685	--	--	--	4.87734e-05	2.14461	up	--	--	--	6.12648e-05	2.07057	up	--	--	--
Panicum_miliaceum_newGene_971	0.000220799	1.85691	up	--	--	--	--	--	--	--	--	--	0.134622	1.07936	normal
Panicum_miliaceum_newGene_9738	4.42121e-05	0.660966	up	7.14433e-12	1.26535	up	1.37764e-31	2.31558	up	1.36454e-09	2.32339	up	0.0741382	-0.726469	normal
Panicum_miliaceum_newGene_9745	0.000115794	1.98807	up	2.40412e-12	3.01776	up	3.01123e-24	3.67642	up	2.54126e-08	2.95504	up	--	--	--
Panicum_miliaceum_newGene_9746	5.69988e-09	2.08785	up	2.62828e-21	3.0321	up	5.36937e-53	3.80808	up	1.44812e-13	2.96653	up	0.000244181	1.77389	up
Panicum_miliaceum_newGene_9747	5.8736e-09	2.3805	up	2.02672e-17	3.30007	up	3.0242e-31	3.8598	up	7.47313e-11	3.26496	up	--	--	--
Panicum_miliaceum_newGene_9748	--	--	--	4.16514e-09	2.78718	up	2.12404e-14	3.29857	up	3.4172e-07	2.82643	up	--	--	--
Panicum_miliaceum_newGene_9754	9.61611e-11	2.34034	up	7.9623e-20	3.15657	up	4.10903e-38	3.83077	up	2.93033e-12	3.15263	up	0.0692795	1.36551	normal
Panicum_miliaceum_newGene_9755	1.70028e-05	2.15209	up	9.14779e-11	2.96474	up	1.62356e-19	3.72689	up	6.35024e-09	3.23065	up	--	--	--
Panicum_miliaceum_newGene_9757	2.22879e-11	2.21267	up	3.90131e-21	2.99416	up	1.63961e-49	3.72488	up	6.96298e-13	3.10107	up	0.00443865	1.40863	up
Panicum_miliaceum_newGene_9758	2.81478e-16	2.19331	up	2.92508e-36	3.1837	up	4.56957e-75	3.81755	up	1.13354e-14	3.0843	up	0.0218355	1.21745	normal
Panicum_miliaceum_newGene_9760	2.84705e-16	2.15654	up	7.80518e-30	3.09128	up	1.39611e-65	3.74506	up	1.7061e-13	3.05308	up	0.00354396	1.38251	up
Panicum_miliaceum_newGene_9761	0.672056	0.212262	normal	0.193332	0.558273	normal	0.88849	-0.0683065	normal	0.00540495	0.922669	up	0.498464	0.49723	normal
Panicum_miliaceum_newGene_9762	--	--	--	2.02134e-11	3.41187	up	1.23489e-14	3.88979	up	8.44306e-08	3.31479	up	--	--	--
Panicum_miliaceum_newGene_9769	0.460079	0.192988	normal	0.0538153	0.395261	normal	0.00145088	0.899387	up	0.154921	0.377618	normal	0.699128	-0.157852	normal
Panicum_miliaceum_newGene_979	2.92989e-19	1.62131	up	4.60794e-46	2.31798	up	4.5591e-134	2.96832	up	8.94957e-28	2.87791	up	0.0201456	0.997098	normal
Panicum_miliaceum_newGene_9790	2.71542e-08	2.04013	up	1.87486e-19	2.98286	up	6.49189e-37	3.64972	up	1.80927e-10	3.01731	up	0.183623	1.05909	normal
Panicum_miliaceum_newGene_9791	4.07353e-10	2.0658	up	5.83257e-34	3.12014	up	1.91298e-58	3.78475	up	4.4097e-17	3.22587	up	4.32609e-05	1.48644	up
Panicum_miliaceum_newGene_9792	1.11743e-13	2.43584	up	9.23457e-20	3.29909	up	1.88508e-41	3.80111	up	2.11015e-10	3.15378	up	0.156127	1.15792	normal
Panicum_miliaceum_newGene_9793	8.57354e-13	2.00747	up	5.58677e-34	2.94181	up	1.61245e-68	3.63255	up	1.59716e-13	3.00739	up	0.0169201	1.22114	normal
Panicum_miliaceum_newGene_9794	--	--	--	6.16943e-08	3.18045	up	8.9978e-12	3.68011	up	3.46579e-07	3.29809	up	--	--	--
Panicum_miliaceum_newGene_9802	2.52866e-06	2.2323	up	5.10668e-14	3.1011	up	6.31253e-26	3.7951	up	2.56123e-10	3.23987	up	--	--	--
Panicum_miliaceum_newGene_9815	1.53048e-05	2.09298	up	8.89968e-19	3.24356	up	4.04245e-28	3.70676	up	1.14319e-10	3.19299	up	--	--	--
Panicum_miliaceum_newGene_9816	1.64952e-09	2.51431	up	5.33893e-22	3.45146	up	8.73004e-40	4.04799	up	6.96125e-14	3.50689	up	0.0501485	1.54523	normal
Panicum_miliaceum_newGene_9817	1.48218e-10	2.3076	up	1.61434e-25	3.17252	up	7.07311e-44	3.88674	up	2.96197e-12	3.24222	up	0.0536559	1.35683	normal
Panicum_miliaceum_newGene_9825	--	--	--	2.92644e-11	3.45159	up	4.93717e-15	3.79695	up	7.62295e-09	3.41087	up	--	--	--
Panicum_miliaceum_newGene_9828	3.51232e-10	2.10581	up	4.4161e-18	3.01265	up	6.76445e-43	3.70881	up	1.06649e-12	3.0503	up	0.000790221	1.45701	up
Panicum_miliaceum_newGene_9829	1.7668e-09	2.18716	up	5.46956e-26	3.19563	up	3.99908e-50	3.84086	up	4.53785e-15	3.19582	up	0.107525	1.04689	normal
Panicum_miliaceum_newGene_9831	1.44932e-13	2.23373	up	2.64712e-34	3.17423	up	1.16047e-71	3.88824	up	1.51091e-16	3.25145	up	0.00231748	1.34252	up
Panicum_miliaceum_newGene_9832	7.63038e-09	2.12712	up	2.20374e-20	3.01174	up	1.13017e-54	3.74597	up	2.08892e-12	3.06903	up	0.0195754	1.21179	normal
Panicum_miliaceum_newGene_9833	0.00136114	1.78578	up	1.89104e-07	2.61803	up	3.2322e-16	3.30769	up	8.82437e-06	2.53975	up	--	--	--
Panicum_miliaceum_newGene_9834	1.52259e-20	2.15168	up	8.17663e-40	3.05532	up	6.53209e-91	3.70491	up	2.56419e-17	3.10031	up	0.000337277	1.26836	up
Panicum_miliaceum_newGene_9835	6.68091e-08	2.05815	up	2.04911e-21	3.09794	up	1.54635e-42	3.76849	up	1.33126e-09	3.13357	up	0.0189423	1.16281	normal
Panicum_miliaceum_newGene_9836	--	--	--	5.48197e-08	2.67363	up	2.46706e-15	3.62967	up	8.87353e-07	3.20891	up	--	--	--
Panicum_miliaceum_newGene_9842	9.35464e-06	1.80454	up	3.60789e-14	2.76908	up	3.73674e-32	3.59385	up	1.74467e-11	2.94722	up	0.148811	0.849059	normal
Panicum_miliaceum_newGene_9843	9.42781e-07	2.15929	up	1.19745e-16	3.23144	up	2.28679e-29	3.83949	up	3.14411e-12	3.33635	up	--	--	--
Panicum_miliaceum_newGene_986	2.17751e-11	1.09624	up	4.34418e-18	1.45465	up	2.01336e-11	1.56164	up	0.000120155	0.811059	up	0.922663	0.0422196	normal
Panicum_miliaceum_newGene_9864	0.370966	0.207023	normal	0.000984537	0.625359	up	7.7011e-10	1.0833	up	0.00886388	0.830805	up	0.475574	0.227967	normal
Panicum_miliaceum_newGene_9866	0.966678	0.0144455	normal	0.296911	0.218075	normal	0.000236519	0.608037	up	0.521883	0.186445	normal	0.0580023	0.673766	normal
Panicum_miliaceum_newGene_9882	4.98308e-09	2.27663	up	5.07827e-17	3.23815	up	6.12556e-36	3.9031	up	2.23148e-13	3.31515	up	0.0490561	1.46809	normal
Panicum_miliaceum_newGene_9883	0.0414475	0.582094	normal	0.248131	0.365442	normal	0.162415	0.441286	normal	0.00798857	0.777336	up	0.813427	0.133448	normal
Panicum_miliaceum_newGene_9891	--	--	--	--	--	--	4.35238e-08	3.06969	up	0.000101498	2.81881	up	--	--	--
Panicum_miliaceum_newGene_9892	--	--	--	3.63895e-09	3.68544	up	3.76453e-20	4.39185	up	--	--	--	--	--	--
Panicum_miliaceum_newGene_9929	1.00852e-05	2.03607	up	2.91323e-17	3.12134	up	8.67842e-41	3.97906	up	4.42025e-10	3.10812	up	0.172752	1.27294	normal
Panicum_miliaceum_newGene_9931	0.966164	-0.0185794	normal	0.689476	0.100042	normal	0.0187345	0.457172	normal	8.70898e-07	0.88945	up	0.0838881	0.59961	normal
Panicum_miliaceum_newGene_9954	--	--	--	2.45618e-06	3.6525	up	3.77344e-11	4.18012	up	--	--	--	--	--	--
Panicum_miliaceum_newGene_998	5.8591e-07	1.58138	up	5.35692e-12	1.9997	up	1.87003e-20	2.59319	up	1.4551e-09	2.12004	up	0.0594621	-1.17814	normal
Panicum_miliaceum_newGene_9983	0.0701867	-0.447081	normal	0.48464	-0.256199	normal	0.418552	0.209541	normal	0.000567688	1.06062	up	0.601362	0.253246	normal
Panicum_miliaceum_newGene_9996	0.0411732	0.587592	normal	0.0305463	0.538679	normal	0.0016196	0.757567	up	0.0177774	0.488385	normal	0.00608709	1.31988	up
gene-C2845_PM01G00030	0.0387838	0.449497	normal	0.00261029	0.724147	up	1.14119e-05	0.857685	up	5.37956e-05	0.821584	up	0.244964	-0.355312	normal
gene-C2845_PM01G00090	0.514229	0.184278	normal	0.659895	0.112447	normal	0.251332	0.258821	normal	0.656413	0.12097	normal	0.00111997	1.1712	up
gene-C2845_PM01G00250	0.135147	0.303403	normal	0.00243129	0.467292	normal	3.81848e-07	0.690866	up	0.000216934	0.702064	up	0.883725	0.0392192	normal
gene-C2845_PM01G00360	0.492497	0.196621	normal	0.166063	0.408224	normal	0.186813	0.346416	normal	4.2638e-06	0.986482	up	0.611185	-0.252756	normal
gene-C2845_PM01G00370	0.370438	0.44396	normal	0.0598851	0.72774	normal	0.00223251	0.999756	up	0.278214	0.439213	normal	0.738241	0.299238	normal
gene-C2845_PM01G00420	0.892535	-0.0918547	normal	0.00422842	-1.06935	down	0.000112338	-1.28651	down	0.392461	-0.33035	normal	1.97263e-09	1.85021	up
gene-C2845_PM01G00450	--	--	--	--	--	--	--	--	--	--	--	--	0.000264437	2.64712	up
gene-C2845_PM01G00470	0.00131081	0.678276	up	3.69082e-11	1.04091	up	7.12705e-11	1.0955	up	5.09125e-07	0.958398	up	0.66991	-0.120271	normal
gene-C2845_PM01G00480	0.962643	0.0406525	normal	0.00898135	1.19081	up	0.000921221	1.42884	up	2.51142e-09	2.10031	up	0.0280074	1.34418	normal
gene-C2845_PM01G00510	0.625662	-0.11908	normal	0.261282	0.249035	normal	0.472231	-0.133096	normal	6.78661e-05	-0.815211	down	0.00345792	0.738232	up
gene-C2845_PM01G00520	0.136161	0.459622	normal	0.00527655	0.685069	up	0.0496002	0.516875	normal	0.022145	0.711337	normal	0.419447	0.367379	normal
gene-C2845_PM01G00540	5.37173e-06	1.42382	up	6.55042e-06	1.54537	up	3.4699e-15	2.43349	up	4.00608e-16	2.29036	up	0.000936955	1.25041	up
gene-C2845_PM01G00590	5.54105e-09	1.3662	up	2.20453e-10	1.46771	up	4.17013e-10	1.59578	up	0.598187	0.169231	normal	0.0370931	0.857463	normal
gene-C2845_PM01G00600	0.0671918	0.368077	normal	0.0117415	-0.523445	normal	0.00012392	-0.802294	down	6.45363e-14	-2.05718	down	0.00136884	1.23196	up
gene-C2845_PM01G00630	5.03724e-16	2.06894	up	1.41601e-17	2.36171	up	5.13923e-25	2.53494	up	3.48447e-08	1.92042	up	0.986212	-0.0150452	normal
gene-C2845_PM01G00650	2.0739e-05	0.823646	up	2.80783e-12	1.1196	up	4.9317e-22	1.52564	up	1.08973e-05	0.803375	up	0.588727	0.151538	normal
gene-C2845_PM01G00670	0.617808	0.112725	normal	0.206299	0.231237	normal	0.00743537	0.47073	normal	2.38146e-05	0.739043	up	0.81954	-0.0686671	normal
gene-C2845_PM01G00770	0.627452	-0.154418	normal	0.475963	0.14761	normal	8.78304e-05	0.757229	up	0.00551029	0.776549	up	0.00488532	0.916527	up
gene-C2845_PM01G00830	0.504627	0.264969	normal	0.0366779	0.75119	normal	0.00382144	0.921885	up	0.0211407	0.798179	normal	0.679182	-0.230072	normal
gene-C2845_PM01G00920	0.399237	0.166341	normal	1.75237e-06	0.715203	up	3.63226e-15	1.04753	up	1.2253e-05	0.948923	up	0.555476	0.121006	normal
gene-C2845_PM01G00940	3.19498e-19	1.5808	up	2.74006e-30	2.43078	up	5.24731e-32	2.31321	up	2.64138e-13	2.04832	up	2.26241e-06	1.92352	up
gene-C2845_PM01G01000	6.21951e-05	1.18483	up	4.02148e-24	2.30474	up	4.22043e-12	3.15442	up	1.05466e-23	3.11453	up	1.56366e-05	1.40042	up
gene-C2845_PM01G01120	0.0939985	0.277688	normal	0.00021527	0.852112	up	7.85268e-16	1.2123	up	4.11997e-16	1.56653	up	0.0913512	0.331575	normal
gene-C2845_PM01G01150	0.0683567	0.750885	normal	0.00289464	1.25052	up	0.0437844	0.711905	normal	0.512649	-0.346153	normal	0.195838	1.17637	normal
gene-C2845_PM01G01160	2.23664e-18	1.18455	up	1.12274e-40	2.23229	up	3.39939e-61	2.36488	up	6.01463e-17	1.87215	up	0.000282544	1.19191	up
gene-C2845_PM01G01200	3.29007e-13	1.21172	up	6.70988e-24	1.42333	up	5.15801e-31	2.06462	up	6.73715e-12	1.59639	up	0.0262174	0.464539	normal
gene-C2845_PM01G01230	0.0412535	0.669725	normal	0.00733854	0.790279	up	0.00246188	0.890025	up	1.16184e-05	1.35985	up	0.631493	0.246635	normal
gene-C2845_PM01G01240	0.00280153	0.536626	normal	0.00489028	0.537032	normal	1.65045e-07	0.883062	up	3.27756e-07	1.15877	up	0.928768	0.030771	normal
gene-C2845_PM01G01280	5.3449e-06	1.30927	up	2.48835e-07	1.45578	up	9.50036e-06	1.09819	up	0.102597	-0.639577	normal	0.911252	-0.0690673	normal
gene-C2845_PM01G01290	5.09485e-09	1.28142	up	3.07671e-24	1.98954	up	3.78636e-72	2.88357	up	1.26426e-16	2.25364	up	9.84736e-20	1.8563	up
gene-C2845_PM01G01350	4.12684e-07	0.78231	up	3.26244e-14	1.02654	up	5.09995e-28	1.42767	up	0.00934462	0.708387	up	0.281594	0.218771	normal
gene-C2845_PM01G01430	6.85529e-05	0.684758	up	0.03635	0.506003	normal	0.00283126	0.579985	normal	0.000412006	0.796075	up	0.175976	0.452333	normal
gene-C2845_PM01G01540	0.750182	-0.106306	normal	0.952873	-0.0207649	normal	0.00200168	0.741834	up	0.000798674	1.00553	up	0.968308	-0.0211543	normal
gene-C2845_PM01G01560	0.701804	0.131014	normal	0.139474	0.477486	normal	0.00122472	0.747028	up	0.0217579	0.579174	normal	0.479028	0.357703	normal
gene-C2845_PM01G01570	0.00716633	0.534263	normal	1.23011e-06	1.05609	up	4.50158e-15	1.53754	up	5.95464e-07	1.01748	up	0.401645	0.264065	normal
gene-C2845_PM01G01660	0.137322	0.549778	normal	0.00286847	0.902791	up	0.000295148	1.13327	up	0.000403756	1.13663	up	0.0724687	-0.945385	normal
gene-C2845_PM01G01690	0.000366378	1.06667	up	0.0449862	1.15395	normal	0.00590223	0.840772	up	0.000793904	-1.68556	down	0.854615	0.132095	normal
gene-C2845_PM01G01750	5.59519e-07	1.22856	up	7.26035e-08	1.3956	up	5.71938e-11	1.5855	up	7.92606e-06	1.22951	up	0.046309	0.919446	normal
gene-C2845_PM01G01770	0.425838	0.220282	normal	0.187833	0.408571	normal	8.61322e-05	0.710325	up	9.22895e-06	1.01858	up	2.06563e-08	1.16443	up
gene-C2845_PM01G01820	3.8842e-12	1.15542	up	1.18628e-20	1.58406	up	2.49955e-33	2.07851	up	2.02744e-08	1.55397	up	0.508349	-0.248943	normal
gene-C2845_PM01G01870	0.227268	0.273573	normal	0.940101	-0.0198851	normal	0.480311	0.160923	normal	0.841144	-0.0485594	normal	0.0087617	0.806175	up
gene-C2845_PM01G01940	0.116034	0.45551	normal	0.000475053	0.883009	up	5.03534e-08	1.29893	up	0.0734822	0.560058	normal	0.95998	-0.0279761	normal
gene-C2845_PM01G01960	0.000985107	0.938173	up	0.00697786	0.748238	up	6.68489e-14	1.62895	up	0.00337703	1.15147	up	0.876644	0.0812198	normal
gene-C2845_PM01G01970	0.0380549	-0.372218	normal	0.0116043	-0.472689	normal	0.0650013	-0.341079	normal	0.662338	-0.0947123	normal	5.23104e-08	1.06118	up
gene-C2845_PM01G01990	0.458323	0.139143	normal	0.000777239	0.450578	normal	5.33937e-07	0.64091	up	3.45696e-07	0.8428	up	0.0883099	0.322938	normal
gene-C2845_PM01G02040	0.000695001	1.24633	up	0.00034405	1.35959	up	0.0029616	1.08854	up	0.39096	0.366377	normal	0.271962	-0.827474	normal
gene-C2845_PM01G02070	8.27115e-06	0.99365	up	6.646e-10	1.39343	up	6.75802e-19	1.85142	up	2.98765e-07	1.49805	up	0.419421	0.339025	normal
gene-C2845_PM01G02080	1.52419e-10	1.91927	up	0.00636122	2.17532	up	3.9748e-05	1.61293	up	1.20025e-11	2.46861	up	0.879333	-0.11041	normal
gene-C2845_PM01G02090	0.00786827	1.65899	up	0.0100463	1.62261	normal	2.60866e-06	2.21973	up	3.24471e-09	2.74303	up	0.625201	0.627853	normal
gene-C2845_PM01G02110	--	--	--	--	--	--	--	--	--	1.32427e-19	6.86203	up	--	--	--
gene-C2845_PM01G02120	2.86186e-06	1.71355	up	7.29995e-06	1.88392	up	0.000839047	1.41318	up	0.00188129	1.37673	up	0.677797	-0.353682	normal
gene-C2845_PM01G02170	0.995481	-0.00283994	normal	0.616536	0.199768	normal	0.0377197	0.636712	normal	0.000173546	1.05359	up	0.924322	-0.0577264	normal
gene-C2845_PM01G02230	0.00235388	0.523691	normal	0.00218624	0.563994	normal	5.44234e-07	0.838592	up	0.00296638	0.569466	normal	0.198234	0.354333	normal
gene-C2845_PM01G02260	0.0574672	0.895807	normal	0.00128932	1.40537	up	0.0173677	1.01919	normal	0.434445	0.405125	normal	0.186538	1.04325	normal
gene-C2845_PM01G02270	0.00486005	0.427175	normal	1.57088e-06	0.719953	up	0.0164594	0.341596	normal	0.000128757	-0.619446	down	0.443121	-0.669072	normal
gene-C2845_PM01G02320	6.49381e-10	0.729208	up	9.84181e-23	1.59531	up	3.31302e-26	1.94975	up	4.22397e-15	1.77213	up	0.882912	-0.0815667	normal
gene-C2845_PM01G02330	0.0694443	0.345964	normal	0.000403698	0.515716	normal	2.91767e-06	0.660632	up	0.042617	0.424607	normal	0.825733	0.0550594	normal
gene-C2845_PM01G02350	0.246631	-0.352603	normal	0.84522	-0.0942164	normal	0.866753	0.0531215	normal	0.00602177	0.620446	up	0.468768	0.24118	normal
gene-C2845_PM01G02390	1.16049e-05	1.07438	up	3.96509e-15	1.73567	up	1.93864e-14	1.73912	up	2.74071e-08	1.3503	up	0.98006	-0.0143708	normal
gene-C2845_PM01G02420	0.794716	-0.115466	normal	0.166823	0.479274	normal	0.0180393	0.620988	normal	0.00605421	0.70379	up	0.169251	0.464291	normal
gene-C2845_PM01G02500	0.323449	0.382291	normal	0.142335	0.52583	normal	0.00034549	1.05729	up	0.186232	0.504944	normal	0.95542	-0.0438597	normal
gene-C2845_PM01G02560	8.70286e-08	3.64812	up	3.16091e-14	4.6182	up	4.06536e-16	4.61296	up	1.21487e-06	3.2831	up	--	--	--
gene-C2845_PM01G02620	8.44099e-19	3.14615	up	2.62265e-76	3.23013	up	1.22651e-107	4.38911	up	1.49693e-108	4.20936	up	0.654034	-0.617568	normal
gene-C2845_PM01G02640	0.964887	-0.0273878	normal	0.0153298	0.920384	normal	9.5611e-06	1.64852	up	0.134708	0.648332	normal	0.07927	-1.12915	normal
gene-C2845_PM01G02650	0.877937	-0.0530415	normal	0.236035	0.289482	normal	3.56356e-06	0.817577	up	8.03645e-06	1.12281	up	0.0243475	0.798697	normal
gene-C2845_PM01G02670	5.23874e-06	1.15743	up	9.70074e-16	1.99183	up	1.1082e-31	2.50627	up	6.43515e-10	1.82196	up	0.139584	0.610483	normal
gene-C2845_PM01G02680	--	--	--	--	--	--	--	--	--	0.00528799	6.22151	up	--	--	--
gene-C2845_PM01G02700	0.808502	0.0821746	normal	0.08799	0.474932	normal	0.000391289	0.856285	up	0.00801261	0.618935	up	0.835736	0.110926	normal
gene-C2845_PM01G02930	0.0266588	0.457308	normal	1.54516e-06	0.897305	up	6.95053e-15	1.23682	up	1.17284e-07	1.34452	up	7.5447e-05	0.879602	up
gene-C2845_PM01G02970	0.33232	0.337339	normal	0.000365822	1.07608	up	3.81984e-07	1.48838	up	0.000140376	1.1114	up	0.0908007	0.667349	normal
gene-C2845_PM01G03010	0.126028	0.525492	normal	0.931606	-0.0398713	normal	0.161888	0.497419	normal	0.00213098	1.02362	up	0.394594	0.621142	normal
gene-C2845_PM01G03020	0.633091	-0.103672	normal	0.43521	-0.187599	normal	0.849893	0.055935	normal	0.0036969	0.630775	up	0.0266474	-0.610872	normal
gene-C2845_PM01G03030	0.97589	-0.00697329	normal	0.416081	0.184749	normal	0.787845	0.06475	normal	0.00106476	0.656686	up	0.00302296	-0.596919	down
gene-C2845_PM01G03040	1.24875e-11	1.47841	up	2.26112e-22	2.2808	up	1.55328e-26	2.66345	up	3.39409e-34	3.50281	up	0.000421766	1.76043	up
gene-C2845_PM01G03060	0.762592	-0.0808583	normal	0.0118598	0.492498	normal	7.58529e-07	0.848842	up	0.00539411	0.73596	up	0.429031	0.260549	normal
gene-C2845_PM01G03070	3.42846e-05	1.20192	up	2.19598e-06	1.48915	up	4.04373e-14	1.98712	up	4.8478e-11	1.95752	up	0.225157	0.710649	normal
gene-C2845_PM01G03130	0.0339964	0.659717	normal	0.0094024	0.790104	up	0.00039818	1.04795	up	0.015828	0.773021	normal	0.784119	0.156856	normal
gene-C2845_PM01G03140	0.267024	0.3599	normal	0.281148	0.309806	normal	0.00208844	0.750879	up	0.839056	-0.0895511	normal	0.000264142	1.35917	up
gene-C2845_PM01G03200	0.146299	0.216007	normal	4.29579e-07	0.771808	up	0.000106675	0.742486	up	0.000801436	0.676494	up	0.627008	-0.322288	normal
gene-C2845_PM01G03280	0.267845	0.226657	normal	0.00089795	0.689333	up	2.33188e-12	1.1345	up	1.42142e-06	0.915422	up	0.990094	0.00537488	normal
gene-C2845_PM01G03290	0.695893	0.109986	normal	0.0216578	0.428354	normal	6.08091e-12	1.11347	up	0.0521148	0.694313	normal	0.228646	0.311911	normal
gene-C2845_PM01G03320	0.27073	0.183556	normal	1.38026e-11	0.852991	up	2.31142e-09	1.06345	up	1.9674e-09	1.15891	up	0.567155	-0.179235	normal
gene-C2845_PM01G03340	6.60609e-19	2.89199	up	1.25371e-32	3.77485	up	6.4619e-36	3.9194	up	2.20961e-22	3.66435	up	0.497553	0.396091	normal
gene-C2845_PM01G03350	0.0635917	0.733304	normal	0.000968392	1.19581	up	3.41045e-05	1.48402	up	2.30253e-06	1.62667	up	0.0444461	1.04725	normal
gene-C2845_PM01G03390	0.212952	0.33665	normal	0.0190576	0.61672	normal	5.47428e-07	0.984097	up	0.00291163	0.640299	up	0.279403	0.503061	normal
gene-C2845_PM01G03450	4.97734e-14	2.02834	up	9.29154e-23	2.71016	up	1.05008e-30	3.01735	up	1.28336e-08	2.0124	up	0.757082	-0.218753	normal
gene-C2845_PM01G03530	0.0649947	0.715379	normal	0.00295724	1.0717	up	7.01731e-07	1.56394	up	6.56091e-07	1.75682	up	0.293704	0.562131	normal
gene-C2845_PM01G03550	0.0114799	0.609069	normal	0.00436303	0.70773	up	0.000110188	0.913786	up	0.0424834	0.578509	normal	0.213132	0.413529	normal
gene-C2845_PM01G03620	0.0133569	0.354665	normal	8.5539e-05	0.589768	up	1.34544e-05	0.615241	up	0.0312366	0.413577	normal	0.98676	-0.0061842	normal
gene-C2845_PM01G03640	0.875932	-0.0352787	normal	0.0149463	0.392424	normal	0.00561041	0.496494	normal	4.14338e-09	0.976579	up	0.964151	0.0210995	normal
gene-C2845_PM01G03680	0.0420634	0.371573	normal	4.6825e-05	0.649882	up	1.01051e-09	0.94954	up	5.43638e-05	0.724821	up	0.630557	0.190717	normal
gene-C2845_PM01G03750	0.00010909	0.550909	normal	4.11201e-10	0.71952	up	8.88502e-05	0.793292	up	0.0233345	0.455193	normal	0.117681	-0.327557	normal
gene-C2845_PM01G03760	0.0164604	0.400145	normal	0.0032926	0.494371	normal	5.0181e-08	0.729765	up	0.0202577	0.502588	normal	0.0095794	-0.492813	normal
gene-C2845_PM01G03840	0.0614977	0.610771	normal	0.0365508	0.713972	normal	1.90076e-10	1.5884	up	1.58551e-15	2.04853	up	0.856689	-0.171506	normal
gene-C2845_PM01G03910	0.573979	-0.197687	normal	0.790529	0.0913737	normal	0.00999817	0.827229	up	0.0109278	0.757153	normal	0.366299	0.355214	normal
gene-C2845_PM01G03930	0.650101	0.124763	normal	0.306462	0.257233	normal	0.0969671	0.353534	normal	0.000162456	0.812666	up	0.85341	0.0663442	normal
gene-C2845_PM01G03990	0.118379	-0.700851	normal	0.689078	-0.211353	normal	1.12491e-05	1.516	up	6.5818e-17	2.6244	up	0.953716	0.0387812	normal
gene-C2845_PM01G04010	0.692042	-0.246845	normal	0.154995	-0.738331	normal	0.00271552	1.15232	up	3.20477e-07	1.6948	up	0.326729	0.748788	normal
gene-C2845_PM01G04020	0.0279564	0.518883	normal	7.81868e-09	1.15282	up	0.0259367	0.574839	normal	0.0329608	0.770074	normal	0.815231	-0.315614	normal
gene-C2845_PM01G04120	0.228007	0.242272	normal	0.000115919	0.60594	up	0.00105757	0.538043	normal	0.00826987	0.477531	normal	0.21685	-0.616582	normal
gene-C2845_PM01G04170	0.102446	0.364505	normal	0.000489552	0.784174	up	0.0209516	0.507071	normal	0.00331033	0.644891	up	0.93139	-0.103096	normal
gene-C2845_PM01G04230	0.353622	0.46275	normal	0.0653022	0.728403	normal	0.00152157	1.11079	up	1.56715e-06	1.721	up	3.91809e-07	2.05363	up
gene-C2845_PM01G04240	0.410393	-0.543463	normal	0.96207	-0.034877	normal	0.904207	-0.070487	normal	0.716996	0.230781	normal	7.78191e-08	3.12759	up
gene-C2845_PM01G04250	--	--	--	--	--	--	--	--	--	--	--	--	0.000609875	2.37175	up
gene-C2845_PM01G04300	3.89392e-05	0.633386	up	8.02182e-06	0.727851	up	9.50073e-12	1.09842	up	2.22448e-05	0.943104	up	0.74294	0.116585	normal
gene-C2845_PM01G04350	0.84408	-0.114555	normal	0.0322463	0.824884	normal	0.000207275	1.35267	up	0.309998	0.450192	normal	0.66312	-0.323905	normal
gene-C2845_PM01G04370	7.11854e-21	1.72773	up	5.22796e-65	2.54727	up	2.69551e-74	2.828	up	2.96364e-29	2.27374	up	0.0010003	2.03632	up
gene-C2845_PM01G04380	3.39318e-05	1.82329	up	0.00041126	1.54966	up	1.59647e-05	1.77564	up	0.750404	0.187048	normal	0.355272	0.756776	normal
gene-C2845_PM01G04450	2.68304e-06	0.986346	up	0.000435232	1.11122	up	1.37966e-07	1.16135	up	6.81951e-07	2.00654	up	0.00308293	-0.920051	down
gene-C2845_PM01G04460	5.17684e-11	1.0798	up	3.74732e-15	1.20206	up	4.34402e-18	1.21877	up	0.554739	0.122097	normal	5.69349e-08	1.37189	up
gene-C2845_PM01G04500	0.00135319	1.6102	up	0.00424566	1.52445	up	0.00486715	1.45476	up	0.790343	-0.2092	normal	0.810773	-0.577667	normal
gene-C2845_PM01G04510	0.00130428	0.631321	up	0.00142426	0.564315	normal	0.323842	0.201195	normal	0.0535861	0.444777	normal	0.703429	0.114261	normal
gene-C2845_PM01G04530	3.29664e-06	1.07874	up	2.75201e-12	1.89968	up	7.99642e-35	2.22485	up	1.87715e-39	3.02626	up	2.24911e-19	-1.99207	down
gene-C2845_PM01G04730	6.0409e-07	0.909801	up	2.07615e-09	1.02434	up	6.03328e-09	1.01203	up	0.00232938	1.15314	up	0.21584	0.356443	normal
gene-C2845_PM01G04770	0.00837148	-0.714349	down	0.0997437	-0.431477	normal	0.574687	0.131481	normal	0.0694188	0.376575	normal	0.0050142	0.72007	up
gene-C2845_PM01G04790	0.00597472	1.58294	up	0.0480362	1.32992	normal	0.0154319	1.33515	normal	0.182163	0.873924	normal	--	--	--
gene-C2845_PM01G04890	2.33944e-20	1.93461	up	2.9035e-06	1.92113	up	6.45295e-21	2.20967	up	7.58377e-07	1.39744	up	0.00242258	-2.30256	down
gene-C2845_PM01G04910	0.553877	-0.113466	normal	0.000454601	-0.555704	normal	0.00794582	-0.445356	normal	0.112342	-0.33277	normal	0.00456943	0.644415	up
gene-C2845_PM01G04980	0.291914	0.362307	normal	0.0107173	0.77452	normal	8.85954e-12	1.5901	up	0.0018837	1.08954	up	0.911536	-0.0642964	normal
gene-C2845_PM01G04990	--	--	--	--	--	--	--	--	--	--	--	--	6.80501e-46	6.92004	up
gene-C2845_PM01G05010	5.39615e-27	2.2108	up	5.11318e-31	2.43803	up	1.65232e-34	2.56135	up	1.39458e-05	1.37623	up	0.2317	-0.417928	normal
gene-C2845_PM01G05080	0.00835889	3.21079	up	0.00317822	3.58447	up	0.000540945	3.77153	up	0.0955725	1.45256	normal	0.749977	0.521682	normal
gene-C2845_PM01G05090	1.2086e-29	3.97088	up	7.716e-42	4.70321	up	9.54104e-47	4.81957	up	1.65548e-18	3.34171	up	2.28296e-06	2.50605	up
gene-C2845_PM01G05100	0.00131958	2.27213	up	1.3707e-07	2.49354	up	1.10372e-05	2.90362	up	0.00684208	1.36296	up	0.136353	1.12806	normal
gene-C2845_PM01G05150	2.91661e-21	2.05426	up	1.32197e-40	2.80594	up	1.53327e-53	3.40198	up	2.92871e-17	2.60153	up	0.00204252	1.2667	up
gene-C2845_PM01G05170	0.000562961	0.504564	normal	6.08961e-16	1.20844	up	3.94084e-21	1.68326	up	1.16246e-07	1.17241	up	0.000825938	0.945409	up
gene-C2845_PM01G05220	0.599522	0.179276	normal	1.68025e-05	0.799805	up	1.63279e-16	1.21025	up	3.69598e-08	1.75892	up	5.1125e-08	-1.13792	down
gene-C2845_PM01G05390	8.81901e-05	0.962165	up	5.76402e-07	1.18622	up	2.42337e-11	1.52161	up	2.22641e-06	1.40551	up	0.599803	0.293028	normal
gene-C2845_PM01G05430	0.906	-0.0426776	normal	0.423081	-0.257487	normal	0.34354	0.269042	normal	0.000112318	0.768579	up	0.647586	0.162843	normal
gene-C2845_PM01G05570	0.658168	-0.106413	normal	0.860973	0.0404582	normal	0.0707364	0.468438	normal	0.00281164	0.569578	normal	8.22728e-06	1.06359	up
gene-C2845_PM01G05580	0.000177227	1.08249	up	5.7768e-06	1.59839	up	2.38158e-13	1.87815	up	0.176466	0.485368	normal	0.832158	0.160592	normal
gene-C2845_PM01G05590	0.292692	0.285703	normal	0.000665261	0.826881	up	0.000475672	0.789506	up	0.774605	-0.0930772	normal	0.302912	-0.473639	normal
gene-C2845_PM01G05600	5.21244e-17	1.58702	up	2.46344e-73	2.81277	up	1.40461e-105	3.57063	up	6.38364e-24	3.02495	up	0.00183068	1.0925	up
gene-C2845_PM01G05610	0.00104647	0.783196	up	4.65037e-10	1.3127	up	1.48906e-14	1.53914	up	9.95917e-11	1.57223	up	0.479499	0.372377	normal
gene-C2845_PM01G05660	6.51491e-40	3.98368	up	1.56641e-142	6.01275	up	2.47927e-143	7.17564	up	3.75713e-65	6.91423	up	5.38091e-15	4.16069	up
gene-C2845_PM01G05670	1.06681e-09	2.05591	up	6.16637e-21	3.01092	up	1.729e-14	2.73469	up	0.00750724	1.39914	up	0.975413	0.0445422	normal
gene-C2845_PM01G05690	1.1837e-09	2.36658	up	1.72142e-11	2.68427	up	5.11064e-20	3.34661	up	0.000253885	1.78709	up	0.00240605	1.85129	up
gene-C2845_PM01G05710	4.56398e-13	2.14145	up	4.54811e-15	2.21442	up	2.44971e-23	2.71467	up	0.000646279	1.19947	up	0.0699836	0.821053	normal
gene-C2845_PM01G05750	3.79733e-07	2.29547	up	0.00295361	1.80487	up	0.000108862	1.78936	up	0.000331005	1.61481	up	4.75994e-06	3.02558	up
gene-C2845_PM01G05810	--	--	--	--	--	--	--	--	--	5.46555e-08	4.35317	up	--	--	--
gene-C2845_PM01G05820	0.569117	0.220681	normal	0.085305	0.60841	normal	0.000112307	1.06459	up	7.11693e-07	1.35482	up	0.809284	0.142099	normal
gene-C2845_PM01G05830	0.393461	0.364652	normal	0.236096	0.561699	normal	0.0050407	1.03406	up	1.7037e-05	1.38391	up	7.53899e-06	1.68642	up
gene-C2845_PM01G05870	7.65792e-06	1.74163	up	2.10296e-07	2.02473	up	5.44049e-13	2.54635	up	0.00714349	1.18026	up	0.00863787	1.56171	up
gene-C2845_PM01G05880	1.72886e-11	1.25144	up	1.47827e-22	1.58638	up	1.92382e-32	1.76733	up	0.036928	0.638777	normal	0.00597719	1.37213	up
gene-C2845_PM01G05910	5.21056e-11	1.19625	up	0.000133138	0.720424	up	0.00163576	0.762734	up	0.722851	-0.113936	normal	0.263998	-0.38631	normal
gene-C2845_PM01G05970	3.45181e-06	0.994777	up	1.72665e-05	1.1025	up	5.19813e-07	0.984259	up	0.000110303	0.925627	up	0.930101	-0.0476303	normal
gene-C2845_PM01G05990	0.530742	0.163817	normal	0.000177214	0.777539	up	4.86681e-07	1.23423	up	3.87566e-10	1.32827	up	0.372198	-0.901644	normal
gene-C2845_PM01G06010	2.35585e-12	1.10137	up	4.86701e-34	1.39642	up	1.69038e-42	1.86262	up	5.00412e-10	1.66152	up	0.00618808	-0.403652	normal
gene-C2845_PM01G06100	1.74136e-05	0.768238	up	9.76086e-05	0.655149	up	1.74024e-10	1.17615	up	0.000110907	1.14944	up	0.509405	0.307756	normal
gene-C2845_PM01G06150	1.36392e-08	2.73221	up	7.46724e-18	3.83326	up	5.04645e-38	5.22655	up	1.18937e-31	5.90354	up	0.0482514	1.74694	normal
gene-C2845_PM01G06170	7.4426e-19	2.07235	up	2.06811e-24	2.53545	up	1.18688e-41	3.08546	up	7.9341e-14	2.4745	up	0.260949	0.595741	normal
gene-C2845_PM01G06200	0.212261	0.673306	normal	0.0381727	1.28811	normal	0.000183617	1.82874	up	0.36225	0.584216	normal	--	--	--
gene-C2845_PM01G06270	1.64443e-23	2.62538	up	2.84739e-27	3.39206	up	7.02312e-63	4.38714	up	1.34786e-35	3.97275	up	0.131374	1.00451	normal
gene-C2845_PM01G06290	0.57171	-0.178359	normal	0.743026	-0.101706	normal	0.767711	-0.0995486	normal	0.00122572	0.713472	up	0.952567	-0.0296205	normal
gene-C2845_PM01G06330	0.000422485	1.13032	up	4.79945e-07	1.43085	up	4.42195e-09	1.55745	up	0.00183939	1.03164	up	0.0505429	-0.919766	normal
gene-C2845_PM01G06340	7.80404e-14	1.35253	up	5.76439e-23	1.86	up	3.16273e-42	2.09174	up	1.43751e-09	1.47168	up	0.503386	0.276433	normal
gene-C2845_PM01G06350	0.0835739	-0.488046	normal	0.979984	0.00857406	normal	0.00131989	0.590852	up	0.0122522	0.697147	normal	0.203822	0.467822	normal
gene-C2845_PM01G06410	2.74473e-11	1.73689	up	2.19585e-08	1.8459	up	2.67395e-08	1.56016	up	3.71853e-06	1.50281	up	2.62142e-11	2.6978	up
gene-C2845_PM01G06470	0.931729	0.061	normal	0.279303	-0.556889	normal	0.393231	-0.410753	normal	0.295375	0.417467	normal	0.00199707	1.18739	up
gene-C2845_PM01G06490	0.985601	-0.00923564	normal	0.495475	0.251663	normal	0.0719794	0.573389	normal	0.00143922	0.915393	up	0.995734	-0.00323717	normal
gene-C2845_PM01G06580	0.00157297	1.42972	up	0.023276	1.69389	normal	0.000704842	1.63689	up	0.0526886	1.29257	normal	2.52824e-07	2.49475	up
gene-C2845_PM01G06620	0.276506	-0.378725	normal	0.179388	-0.471296	normal	0.173635	-0.436345	normal	0.526723	-0.197913	normal	0.00990708	0.672676	up
gene-C2845_PM01G06660	8.24557e-25	2.07822	up	1.94396e-38	2.62014	up	4.4123e-49	3.07554	up	7.68299e-08	1.75426	up	0.416845	0.301908	normal
gene-C2845_PM01G06820	4.82418e-05	0.954682	up	2.19106e-05	1.05721	up	0.0234449	0.634795	normal	0.0074591	0.670778	up	0.429324	-0.935309	normal
gene-C2845_PM01G06840	0.173227	0.409251	normal	0.193652	0.376469	normal	0.0858452	0.50898	normal	0.00607669	0.883983	up	0.917891	-0.0710757	normal
gene-C2845_PM01G06890	0.00427492	0.573776	normal	0.000235759	0.645889	up	3.05594e-07	0.977185	up	0.433155	0.207255	normal	0.624276	-0.208238	normal
gene-C2845_PM01G06900	1.1717e-07	1.58525	up	6.17368e-10	1.69162	up	1.72489e-18	2.30389	up	5.89879e-05	1.40483	up	0.0216653	1.0617	normal
gene-C2845_PM01G06910	0.00723612	1.23334	up	1.86338e-06	1.69788	up	1.069e-07	2.1283	up	0.000361328	1.28438	up	0.00554753	1.32908	up
gene-C2845_PM01G06930	0.00105814	2.51423	up	2.01011e-07	2.53052	up	2.22372e-05	2.91182	up	0.01564	1.305	normal	0.0522659	1.70846	normal
gene-C2845_PM01G06950	0.0973535	0.352344	normal	0.00851483	0.710476	up	2.56473e-08	1.01767	up	9.19051e-06	0.956597	up	0.442078	-0.301017	normal
gene-C2845_PM01G07020	0.208027	0.466426	normal	0.0015469	0.746523	up	3.95253e-05	0.885226	up	4.76826e-07	1.0673	up	0.347771	-0.540949	normal
gene-C2845_PM01G07050	2.94159e-05	1.51935	up	3.16116e-12	2.45259	up	6.89773e-16	2.97868	up	1.03815e-05	1.5076	up	0.00158947	1.47183	up
gene-C2845_PM01G07080	0.510251	0.141333	normal	0.326085	0.186075	normal	0.025374	0.447672	normal	1.81959e-09	0.973732	up	0.815278	-0.0744117	normal
gene-C2845_PM01G07090	1.82528e-08	1.05916	up	1.41696e-13	1.44758	up	3.96979e-26	1.87545	up	3.31857e-06	1.169	up	0.940412	0.0289145	normal
gene-C2845_PM01G07100	0.616556	-0.14493	normal	0.560482	0.13892	normal	0.150508	0.36691	normal	2.20812e-05	0.748339	up	0.370308	0.231031	normal
gene-C2845_PM01G07190	0.000630443	0.654937	up	0.00191786	0.611864	up	0.0008718	0.672832	up	0.716945	-0.0887157	normal	0.817944	0.202287	normal
gene-C2845_PM01G07200	9.46627e-18	2.24237	up	1.43141e-41	2.86259	up	4.05697e-61	3.54232	up	1.44996e-23	2.63373	up	0.00200844	1.09977	up
gene-C2845_PM01G07320	0.00630853	0.833434	up	1.8046e-10	1.5427	up	2.3567e-08	1.51773	up	2.02639e-05	1.11686	up	0.410454	0.461515	normal
gene-C2845_PM01G07350	0.209796	0.22082	normal	0.00510345	0.446559	normal	4.6843e-14	0.923737	up	0.0117175	0.545102	normal	0.177992	0.246582	normal
gene-C2845_PM01G07470	1.16123e-11	2.52448	up	7.04166e-25	3.1581	up	8.65573e-55	3.98629	up	5.02529e-38	3.87609	up	0.24819	0.823624	normal
gene-C2845_PM01G07490	0.16538	0.314099	normal	0.412592	0.272835	normal	0.000984065	0.621488	up	0.0255264	0.451995	normal	0.262051	0.322518	normal
gene-C2845_PM01G07500	0.344534	0.211823	normal	0.132042	0.375614	normal	0.00202928	0.617123	up	0.916093	0.0410681	normal	0.186085	-0.421399	normal
gene-C2845_PM01G07640	--	--	--	--	--	--	--	--	--	--	--	--	8.07486e-08	4.25034	up
gene-C2845_PM01G07650	0.0117397	0.716931	normal	0.0329278	0.618441	normal	0.000998551	0.81147	up	0.748794	-0.125798	normal	0.046309	0.799628	normal
gene-C2845_PM01G07660	1.87017e-22	2.33401	up	5.88309e-62	3.8165	up	2.23215e-91	4.70602	up	2.69195e-56	5.21484	up	2.50754e-10	2.31008	up
gene-C2845_PM01G07700	0.0157824	0.783466	normal	8.92493e-05	0.996119	up	0.00904503	0.790782	up	0.679219	-0.202094	normal	0.0287076	-1.14458	normal
gene-C2845_PM01G07790	0.0531391	0.600622	normal	0.0019156	1.07533	up	0.0626012	0.622638	normal	0.661351	-0.173223	normal	0.929414	-0.148111	normal
gene-C2845_PM01G07800	2.43315e-06	1.16249	up	2.1113e-13	1.74264	up	2.12659e-21	2.15031	up	3.19833e-15	2.14761	up	0.00634962	0.989352	up
gene-C2845_PM01G07860	0.0163129	0.363516	normal	0.0842272	0.268921	normal	0.000595133	0.548561	normal	8.59696e-07	0.818828	up	0.0042359	0.55884	normal
gene-C2845_PM01G07890	0.000208921	0.671714	up	8.6244e-09	1.04095	up	3.20384e-18	1.30777	up	0.000513135	0.844637	up	0.534787	0.191313	normal
gene-C2845_PM01G07940	5.96935e-12	1.09526	up	7.98142e-28	1.79986	up	3.21565e-60	2.30638	up	2.86595e-10	2.00046	up	0.593135	0.230024	normal
gene-C2845_PM01G07950	0.00948272	0.641266	up	0.811498	-0.100018	normal	0.02705	-0.61006	normal	4.3976e-13	-2.15833	down	0.0513593	-0.761055	normal
gene-C2845_PM01G07980	0.0228536	0.404179	normal	0.0226419	0.410295	normal	0.0350368	0.494957	normal	1.10768e-05	0.832744	up	0.96249	-0.0462633	normal
gene-C2845_PM01G07990	5.25174e-07	1.11531	up	1.02256e-08	1.11925	up	7.95007e-12	1.25316	up	0.00152711	0.631756	up	0.397994	0.492017	normal
gene-C2845_PM01G08010	2.39184e-25	1.59281	up	4.26384e-35	2.01867	up	1.53056e-39	2.00029	up	2.81513e-05	0.785352	up	0.959574	0.0234108	normal
gene-C2845_PM01G08020	6.7545e-10	2.05493	up	9.73656e-28	3.27552	up	4.96473e-33	3.64695	up	6.45267e-28	3.96186	up	0.93236	0.0560162	normal
gene-C2845_PM01G08060	3.01431e-13	1.90089	up	3.77229e-30	2.60105	up	3.4153e-48	2.98478	up	7.33535e-24	2.74902	up	0.182535	0.520166	normal
gene-C2845_PM01G08080	0.00198836	1.52979	up	3.492e-06	2.21402	up	4.54451e-05	1.96516	up	0.75011	0.207141	normal	0.666455	0.526475	normal
gene-C2845_PM01G08120	4.54729e-05	2.30779	up	6.22395e-08	2.91796	up	--	--	--	1.17101e-10	3.07133	up	--	--	--
gene-C2845_PM01G08150	0.000950208	0.682852	up	3.41621e-09	1.14649	up	7.26399e-11	1.24365	up	1.01805e-05	0.940347	up	0.826651	-0.19096	normal
gene-C2845_PM01G08160	0.0370756	0.462968	normal	0.103571	0.43191	normal	0.00289458	0.611471	up	7.20722e-05	0.855732	up	5.66652e-07	1.73103	up
gene-C2845_PM01G08170	0.882665	0.0629381	normal	0.0131704	0.731182	normal	8.67852e-06	0.99085	up	0.166711	0.43542	normal	0.604874	-0.214577	normal
gene-C2845_PM01G08180	0.149976	-0.296208	normal	0.896659	-0.033161	normal	0.0497289	0.40003	normal	0.00557882	0.622263	up	0.385849	-0.213821	normal
gene-C2845_PM01G08190	4.11846e-11	2.12099	up	2.11256e-38	3.50085	up	2.98109e-70	4.33691	up	3.29506e-32	4.00329	up	0.0288683	0.922959	normal
gene-C2845_PM01G08230	0.177745	0.737083	normal	1.72414e-09	3.13045	up	3.16143e-16	4.236	up	6.83978e-28	4.40116	up	0.482826	0.693721	normal
gene-C2845_PM01G08240	--	--	--	--	--	--	--	--	--	1.1421e-09	2.81003	up	--	--	--
gene-C2845_PM01G08330	0.438598	-0.166745	normal	0.442272	0.144966	normal	1.71231e-06	0.792293	up	0.00087358	0.880553	up	0.000536334	0.944661	up
gene-C2845_PM01G08340	0.0644839	0.550042	normal	8.11032e-10	1.50024	up	5.12932e-20	2.16875	up	0.000390808	1.0716	up	0.536971	-0.339585	normal
gene-C2845_PM01G08430	0.00019928	0.696157	up	2.89216e-15	1.28835	up	4.50121e-32	1.69972	up	8.45029e-14	1.57227	up	0.164685	0.288772	normal
gene-C2845_PM01G08440	0.00688898	-0.418354	normal	0.00212633	0.600008	up	3.89353e-06	0.743412	up	0.00763631	0.639091	up	0.607043	-0.487094	normal
gene-C2845_PM01G08540	0.420434	-0.205867	normal	1.11904e-05	-0.902978	down	0.372552	-0.199449	normal	0.306023	0.263878	normal	8.03636e-05	1.27047	up
gene-C2845_PM01G08560	1.58061e-12	3.10178	up	1.3692e-05	4.11977	up	3.33791e-20	4.13416	up	1.656e-08	3.23865	up	0.127522	1.45599	normal
gene-C2845_PM01G08580	0.003411	0.761088	up	0.165034	0.442781	normal	0.357155	0.335969	normal	0.263663	0.453194	normal	0.219065	-0.543514	normal
gene-C2845_PM01G08610	--	--	--	--	--	--	--	--	--	0.000388459	1.62867	up	--	--	--
gene-C2845_PM01G08620	4.54317e-08	0.820026	up	3.12176e-14	1.10149	up	1.50448e-34	1.75296	up	1.95835e-13	1.62437	up	0.484126	0.210384	normal
gene-C2845_PM01G08630	0.138062	0.476825	normal	0.000954104	0.889489	up	5.05782e-06	1.33047	up	3.80056e-12	1.49706	up	0.637557	0.235201	normal
gene-C2845_PM01G08670	0.950039	-0.0390804	normal	0.0258619	0.845121	normal	0.0423818	0.949147	normal	0.0029662	1.29874	up	0.153007	-0.988701	normal
gene-C2845_PM01G08690	0.218839	-0.294794	normal	0.244743	0.331264	normal	0.000102801	0.813703	up	0.0126553	-0.699878	normal	0.000665054	-1.26487	down
gene-C2845_PM01G08700	5.17015e-08	1.58505	up	9.06895e-10	2.00789	up	1.63738e-14	2.084	up	9.3554e-08	1.73562	up	0.809112	-0.150011	normal
gene-C2845_PM01G08710	0.0436159	-0.333197	normal	0.0662873	-0.343546	normal	1.36226e-05	-0.679556	down	0.000106487	-0.782953	down	4.03724e-06	1.14828	up
gene-C2845_PM01G08750	7.78522e-18	1.67145	up	6.43039e-13	2.11006	up	1.42867e-29	2.26945	up	1.33569e-06	1.6618	up	0.644186	0.244221	normal
gene-C2845_PM01G08770	0.00720317	0.578696	normal	7.50112e-08	1.0405	up	2.49069e-13	1.06834	up	0.0285416	0.536473	normal	0.410249	0.25773	normal
gene-C2845_PM01G08820	2.59533e-12	2.70146	up	4.07733e-13	3.02507	up	5.06882e-30	4.38015	up	4.12478e-17	3.10012	up	7.61532e-05	1.88028	up
gene-C2845_PM01G08830	0.00489218	0.479169	normal	3.21768e-06	0.755866	up	3.95446e-11	1.07011	up	1.1031e-05	0.851481	up	0.678663	0.123661	normal
gene-C2845_PM01G08860	0.0424683	0.518894	normal	0.115819	0.469536	normal	4.75834e-09	1.44143	up	0.00458828	0.742334	up	0.0898088	0.810008	normal
gene-C2845_PM01G08870	1.69431e-07	0.943261	up	6.56883e-16	1.39131	up	1.96674e-21	1.73488	up	2.04715e-08	1.14438	up	0.520418	0.173035	normal
gene-C2845_PM01G08900	2.61048e-16	1.76609	up	1.29717e-51	2.85222	up	2.35674e-61	3.6175	up	4.77972e-14	2.11636	up	0.451623	-0.372247	normal
gene-C2845_PM01G08930	0.0118406	0.698949	normal	7.05417e-17	2.4459	up	6.29058e-27	3.23432	up	2.80631e-13	1.78548	up	0.452731	0.436294	normal
gene-C2845_PM01G08950	0.516683	0.163322	normal	0.383578	0.274402	normal	0.115699	0.305192	normal	0.00833971	0.652204	up	0.0413355	0.449015	normal
gene-C2845_PM01G08970	0.538896	0.209399	normal	0.0510725	0.50372	normal	0.0001102	0.890635	up	1.45053e-05	0.99934	up	0.156863	0.478496	normal
gene-C2845_PM01G08980	0.555378	-0.156995	normal	0.201229	-0.3677	normal	0.0651191	-0.874271	normal	9.03985e-07	-1.50536	down	8.19142e-06	1.89791	up
gene-C2845_PM01G09050	5.67017e-12	1.65265	up	4.69061e-12	1.8662	up	6.0105e-18	2.08077	up	6.42334e-07	1.4349	up	0.0464509	0.7876	normal
gene-C2845_PM01G09080	1.70156e-05	1.12853	up	3.70794e-05	1.24209	up	1.26273e-20	1.7154	up	0.00224924	0.857874	up	0.000738689	-0.927468	down
gene-C2845_PM01G09160	0.0022189	1.52726	up	0.0686272	1.25131	normal	0.00873022	1.39753	up	0.00702018	1.68146	up	0.802367	0.25189	normal
gene-C2845_PM01G09260	0.103788	0.323775	normal	5.34737e-05	0.752144	up	7.35691e-13	1.15898	up	0.716445	0.134285	normal	0.383696	0.264342	normal
gene-C2845_PM01G09280	1.17286e-07	1.18645	up	1.49826e-20	1.77086	up	1.32187e-41	2.60606	up	1.0111e-17	2.3075	up	0.164177	0.483619	normal
gene-C2845_PM01G09290	0.00575875	0.452934	normal	3.36023e-10	0.954051	up	3.56418e-24	1.46943	up	2.06242e-11	1.5726	up	5.00626e-05	1.03691	up
gene-C2845_PM01G09380	0.0465032	0.703884	normal	0.00138826	0.999703	up	0.000374418	1.10111	up	8.08561e-05	1.22489	up	0.027656	-1.14118	normal
gene-C2845_PM01G09420	0.00365182	0.702218	up	4.17384e-11	1.29883	up	2.75172e-24	1.94206	up	2.13882e-06	1.4241	up	0.825476	-0.0858121	normal
gene-C2845_PM01G09490	0.541214	0.361266	normal	0.11227	0.801881	normal	0.397343	0.468278	normal	0.00329662	1.30059	up	0.423243	0.529205	normal
gene-C2845_PM01G09510	1.38731e-05	0.720343	up	4.28383e-06	0.913279	up	1.97121e-09	1.1041	up	0.00984681	0.653548	up	0.379346	-0.254774	normal
gene-C2845_PM01G09550	0.0404945	0.419292	normal	5.5845e-09	1.08875	up	3.18229e-22	1.41628	up	4.13614e-10	1.23305	up	0.249251	0.297401	normal
gene-C2845_PM01G09560	0.297876	0.269213	normal	0.000837942	0.716618	up	0.0770205	0.422002	normal	0.0167839	0.551544	normal	0.239058	0.358993	normal
gene-C2845_PM01G09630	0.000237714	0.747287	up	9.56761e-08	1.03215	up	6.21647e-08	1.03515	up	0.00696211	0.614268	up	0.00847016	0.962001	up
gene-C2845_PM01G09670	3.29387e-07	0.967578	up	9.91441e-07	0.866167	up	0.000248578	0.703297	up	0.0010849	0.481749	normal	0.872116	-0.0380598	normal
gene-C2845_PM01G09700	1.59906e-05	1.05542	up	1.73081e-09	1.8482	up	5.01865e-17	2.07872	up	4.00489e-11	1.94804	up	0.0406987	-0.776567	normal
gene-C2845_PM01G09790	0.110336	0.46386	normal	0.0014	0.777691	up	0.0352813	0.540277	normal	0.0467092	0.506061	normal	0.00605379	1.14651	up
gene-C2845_PM01G09830	4.55996e-16	2.35783	up	7.42528e-18	2.64309	up	1.88147e-34	3.27124	up	4.27446e-17	2.58354	up	0.00669556	1.38891	up
gene-C2845_PM01G09920	0.000224447	1.18457	up	2.00886e-07	1.61619	up	9.3691e-13	2.02584	up	0.000167664	1.2625	up	0.919965	0.0855753	normal
gene-C2845_PM01G09980	0.760792	-0.124031	normal	0.745267	0.123114	normal	0.271944	0.363197	normal	0.00679001	0.833599	up	0.52627	-0.652253	normal
gene-C2845_PM01G10030	0.913261	-0.0408614	normal	0.0550281	0.377005	normal	0.00497783	0.546021	normal	2.52592e-05	0.864901	up	0.798002	-0.0806502	normal
gene-C2845_PM01G10040	1.00034e-12	1.38512	up	3.96641e-19	1.85937	up	3.32511e-24	2.12943	up	1.88679e-05	1.33251	up	0.0193712	0.64907	normal
gene-C2845_PM01G10050	0.115614	0.504701	normal	0.0183375	0.618159	normal	2.20735e-06	1.12416	up	1.45966e-10	1.59733	up	0.99382	0.00360291	normal
gene-C2845_PM01G10170	0.461712	0.138198	normal	0.161727	0.238716	normal	0.002425	0.463476	normal	1.0324e-06	0.765873	up	0.0263204	0.402491	normal
gene-C2845_PM01G10190	8.61578e-19	1.95307	up	7.83134e-37	2.64125	up	8.04039e-31	2.40661	up	1.13019e-08	1.63408	up	0.548014	0.295424	normal
gene-C2845_PM01G10200	3.16614e-11	1.21663	up	3.38174e-09	1.73975	up	2.0427e-16	1.62456	up	0.0102118	0.662969	normal	0.00180423	-1.00477	down
gene-C2845_PM01G10240	0.233864	0.229682	normal	0.00776873	0.627685	up	5.35716e-07	0.971842	up	7.4645e-09	1.29228	up	1.77217e-05	1.12848	up
gene-C2845_PM01G10250	0.800699	0.0602614	normal	0.989666	-0.0030443	normal	0.641431	-0.0993463	normal	0.510309	-0.160786	normal	8.07867e-08	1.49097	up
gene-C2845_PM01G10260	0.191672	0.576608	normal	0.423224	0.407576	normal	0.00327961	1.09294	up	0.00529152	1.07682	up	0.647574	0.335923	normal
gene-C2845_PM01G10280	1.17286e-07	0.854531	up	2.123e-11	1.08782	up	5.42708e-16	1.16587	up	0.0120526	0.514582	normal	0.178125	0.265182	normal
gene-C2845_PM01G10300	0.366751	0.25388	normal	1.46451e-21	1.62733	up	2.73434e-40	2.335	up	1.0289e-12	2.19375	up	3.28968e-16	1.91212	up
gene-C2845_PM01G10360	0.632009	0.155417	normal	8.98102e-06	1.04334	up	3.06422e-14	1.41592	up	1.31707e-07	2.04976	up	2.37017e-07	1.07124	up
gene-C2845_PM01G10370	0.12194	0.39203	normal	0.163234	0.353469	normal	0.00184412	0.744901	up	0.000396499	0.809764	up	0.00655255	0.716343	up
gene-C2845_PM01G10390	--	--	--	--	--	--	--	--	--	3.24944e-13	5.20638	up	1.65771e-05	3.32862	up
gene-C2845_PM01G10400	0.925292	0.0351958	normal	0.773914	-0.108345	normal	0.976225	-0.0100039	normal	0.00372884	0.985546	up	0.122757	0.563352	normal
gene-C2845_PM01G10420	--	--	--	--	--	--	--	--	--	2.87008e-13	6.70692	up	2.78111e-07	4.76843	up
gene-C2845_PM01G10440	8.39622e-35	1.79052	up	7.85513e-29	1.88983	up	7.19172e-53	2.28334	up	2.86949e-05	1.21744	up	1.2001e-06	1.7811	up
gene-C2845_PM01G10450	0.000493065	0.58958	up	0.0059366	0.533722	normal	0.063578	0.34353	normal	0.0163936	-0.477621	normal	0.0115297	-0.861059	normal
gene-C2845_PM01G10480	0.000458939	0.656652	up	1.05055e-06	0.924831	up	2.72284e-11	1.09508	up	2.93424e-05	0.963664	up	0.388443	0.286102	normal
gene-C2845_PM01G10500	1.84234e-33	3.19809	up	3.87546e-40	3.63791	up	7.36717e-67	4.17191	up	1.57744e-34	3.35243	up	0.374232	0.660691	normal
gene-C2845_PM01G10560	7.11317e-05	1.34516	up	3.66607e-06	1.4764	up	1.04244e-06	1.61773	up	1.73406e-15	2.48623	up	0.976325	0.0353641	normal
gene-C2845_PM01G10570	3.72211e-06	0.870131	up	7.51162e-23	2.03921	up	1.22266e-53	2.64514	up	2.52854e-13	2.17766	up	0.65974	0.151587	normal
gene-C2845_PM01G10600	1.48905e-08	2.52276	up	1.55593e-14	3.35551	up	7.16563e-22	3.85138	up	2.15802e-06	2.2629	up	0.56063	0.530503	normal
gene-C2845_PM01G10620	9.33603e-08	1.08218	up	4.49215e-25	2.00917	up	2.17184e-27	2.19649	up	1.15644e-06	1.70674	up	1.13892e-05	-1.27404	down
gene-C2845_PM01G10680	6.27372e-15	1.9514	up	1.0623e-22	2.49439	up	1.28805e-38	2.61654	up	8.9856e-08	1.7369	up	0.845569	0.0911508	normal
gene-C2845_PM01G10730	6.10556e-07	1.07395	up	0.919967	-0.0962482	normal	0.310808	-0.723759	normal	0.00436141	-1.51085	down	0.56901	1.94172	normal
gene-C2845_PM01G10740	1.89928e-06	0.787556	up	2.26422e-18	1.64622	up	7.52062e-34	2.05922	up	8.08268e-17	1.78134	up	0.00205596	0.774049	up
gene-C2845_PM01G10760	0.0156173	0.397423	normal	0.039171	0.396117	normal	0.0128187	0.414169	normal	1.81655e-05	0.743864	up	0.844161	-0.0767862	normal
gene-C2845_PM01G10780	5.51203e-09	0.859792	up	4.61932e-22	1.34697	up	3.62086e-32	1.57644	up	4.06463e-06	1.10335	up	0.148324	0.384462	normal
gene-C2845_PM01G10790	5.26447e-14	1.93266	up	3.99737e-21	2.37826	up	2.11928e-33	2.73327	up	9.22797e-08	1.62169	up	7.10019e-07	1.72366	up
gene-C2845_PM01G10850	1.52264e-07	0.716521	up	4.19161e-08	0.770309	up	1.42597e-07	0.730247	up	0.0252479	0.365656	normal	0.358257	0.179292	normal
gene-C2845_PM01G10890	--	--	--	5.99438e-05	3.42706	up	--	--	--	--	--	--	--	--	--
gene-C2845_PM01G10990	1.03433e-05	0.680292	up	1.38199e-10	0.786026	up	6.84556e-11	1.02748	up	0.0791522	0.436823	normal	0.0108465	0.444859	normal
gene-C2845_PM01G11070	0.00613616	0.473852	normal	2.52019e-05	0.756252	up	0.229907	0.26314	normal	0.00960317	0.512696	normal	0.0344918	-1.72156	normal
gene-C2845_PM01G11130	0.278052	-0.824691	normal	0.796451	-0.23425	normal	0.403641	-0.490284	normal	0.8055	-0.144168	normal	2.62077e-07	2.84081	up
gene-C2845_PM01G11150	0.000153768	0.795849	up	1.02337e-16	1.40891	up	1.0632e-26	1.5926	up	1.18793e-07	1.03013	up	0.85821	-0.0587397	normal
gene-C2845_PM01G11160	0.0061783	0.516546	normal	4.7224e-05	0.607648	up	6.49843e-05	0.792265	up	0.70576	-0.0905675	normal	0.350954	0.230254	normal
gene-C2845_PM01G11170	1.1185e-05	1.0919	up	3.89709e-06	1.23517	up	2.96456e-10	1.5508	up	0.00971336	0.757102	up	0.815365	0.187959	normal
gene-C2845_PM01G11190	3.54793e-08	3.42406	up	--	--	--	5.72572e-08	2.39006	up	2.86548e-08	3.36637	up	--	--	--
gene-C2845_PM01G11210	0.0305641	1.25922	normal	1.87539e-05	2.17875	up	5.52209e-05	1.60412	up	8.54026e-09	2.23662	up	0.0076011	1.39274	up
gene-C2845_PM01G11250	2.61715e-07	1.56621	up	7.02066e-10	1.92116	up	5.09594e-14	2.16797	up	0.000132114	1.40635	up	0.353737	0.539973	normal
gene-C2845_PM01G11280	0.0115314	1.10752	normal	0.00380938	1.24581	up	0.00450279	1.22226	up	0.136368	0.697526	normal	0.579433	-0.694789	normal
gene-C2845_PM01G11290	2.72659e-06	1.57641	up	5.71176e-06	1.63651	up	0.00052613	1.3342	up	0.0999073	0.710638	normal	0.622158	-0.448059	normal
gene-C2845_PM01G11300	4.61677e-07	1.02978	up	0.00168812	0.687233	up	0.0154275	0.599584	normal	0.000319477	-0.794742	down	0.988114	-0.00625346	normal
gene-C2845_PM01G11320	0.00531305	1.86076	up	0.00907119	1.89498	up	--	--	--	--	--	--	--	--	--
gene-C2845_PM01G11430	0.00459574	1.19136	up	7.07541e-25	3.69369	up	1.80138e-44	4.30648	up	4.30463e-30	4.90863	up	0.641187	0.405282	normal
gene-C2845_PM01G11440	2.12165e-09	1.23598	up	8.11201e-32	2.57861	up	7.93184e-112	3.29069	up	1.92215e-20	3.17404	up	1.29898e-15	-1.76782	down
gene-C2845_PM01G11580	0.0274903	0.368733	normal	3.89863e-07	0.846956	up	1.09061e-05	0.906365	up	4.89658e-09	0.96827	up	0.0228215	-1.24734	normal
gene-C2845_PM01G11590	7.44677e-17	2.01969	up	1.41122e-28	2.47554	up	1.12393e-36	2.65885	up	8.49232e-05	1.3567	up	0.152304	0.741577	normal
gene-C2845_PM01G11600	0.000607346	0.968566	up	8.5628e-10	1.6436	up	3.03892e-16	2.06233	up	5.2392e-18	2.23063	up	0.602444	0.293845	normal
gene-C2845_PM01G11610	0.000565118	0.588594	up	6.99001e-11	0.899263	up	2.43688e-11	1.00082	up	0.554135	0.190644	normal	0.0340706	0.404265	normal
gene-C2845_PM01G11640	--	--	--	--	--	--	1.57821e-13	8.21991	up	1.02227e-16	9.11577	up	--	--	--
gene-C2845_PM01G11650	0.475144	-0.258082	normal	0.515451	-0.364007	normal	0.432781	-0.309547	normal	0.301435	0.337706	normal	2.57032e-14	2.14034	up
gene-C2845_PM01G11690	0.386076	0.355817	normal	0.436076	0.318412	normal	0.725203	-0.112122	normal	0.00168598	1.44513	up	0.382518	-0.594196	normal
gene-C2845_PM01G11720	0.0486427	0.442552	normal	0.00993208	0.58942	up	2.54989e-06	0.886069	up	0.00016208	0.799163	up	0.392296	0.303186	normal
gene-C2845_PM01G11750	1.09875e-07	0.740868	up	2.13707e-12	1.13223	up	3.58765e-11	1.23343	up	6.36782e-08	1.40659	up	1.37902e-09	1.42523	up
gene-C2845_PM01G11760	0.00271619	0.519305	normal	1.16048e-08	0.912524	up	3.11561e-08	1.06567	up	4.14613e-05	1.00369	up	0.521171	0.152931	normal
gene-C2845_PM01G11770	--	--	--	--	--	--	--	--	--	0.0010352	1.5159	up	--	--	--
gene-C2845_PM01G11780	6.58253e-16	2.79442	up	6.32474e-07	2.66872	up	2.1758e-26	3.22717	up	9.78773e-07	1.98709	up	0.101405	0.952996	normal
gene-C2845_PM01G11790	1.36533e-21	3.24224	up	2.20147e-25	3.59388	up	2.87446e-35	4.14335	up	5.68058e-14	3.15386	up	0.420383	0.534962	normal
gene-C2845_PM01G11800	0.205549	0.260101	normal	0.00618895	0.587048	up	2.90275e-08	0.89682	up	0.00948228	0.609616	up	0.730696	0.0921173	normal
gene-C2845_PM01G11840	7.12017e-24	2.04662	up	8.63287e-30	2.2097	up	3.99021e-21	2.28755	up	4.61478e-21	3.7336	up	6.92449e-44	2.80949	up
gene-C2845_PM01G11860	0.000438761	2.61152	up	3.7272e-09	2.79567	up	1.32037e-06	3.24673	up	0.000125704	1.92125	up	0.349966	0.844292	normal
gene-C2845_PM01G11870	1.28632e-09	1.36663	up	8.34261e-08	1.29242	up	1.99361e-14	1.88713	up	1.61976e-14	1.90169	up	0.00203895	1.30894	up
gene-C2845_PM01G11930	0.469533	0.225062	normal	0.0156977	1.11025	normal	1.52895e-20	1.62527	up	3.59165e-05	1.94065	up	1.54095e-10	-2.27091	down
gene-C2845_PM01G11950	0.0562031	0.338514	normal	0.00689349	0.537585	normal	0.00174317	0.575716	normal	0.000316346	0.729195	up	0.00356879	0.768708	up
gene-C2845_PM01G12020	0.715714	-0.255289	normal	0.610459	0.30185	normal	0.140306	0.885379	normal	2.51647e-05	1.55808	up	0.956537	0.0454584	normal
gene-C2845_PM01G12050	0.952369	0.0161184	normal	0.930258	0.0206002	normal	0.324564	0.186954	normal	0.00141031	0.587417	up	0.586501	0.133288	normal
gene-C2845_PM01G12070	4.84766e-07	2.41487	up	5.85637e-21	3.56188	up	3.46189e-19	3.81452	up	6.73427e-20	4.75425	up	--	--	--
gene-C2845_PM01G12130	0.494546	0.195921	normal	9.63584e-14	1.08924	up	2.01964e-16	1.7404	up	1.08937e-07	1.40363	up	0.849549	0.0998257	normal
gene-C2845_PM01G12140	0.0211757	0.650202	normal	0.00900086	0.761834	up	4.32516e-06	1.18782	up	0.248838	0.368725	normal	0.000893851	1.75453	up
gene-C2845_PM01G12250	0.756612	0.114008	normal	0.124668	0.466489	normal	0.0248165	0.822153	normal	9.43955e-06	1.09357	up	0.537517	-0.276843	normal
gene-C2845_PM01G12300	2.31534e-08	2.05982	up	6.23228e-15	2.86878	up	4.22187e-29	3.81696	up	3.59363e-14	3.13066	up	2.73187e-14	4.02383	up
gene-C2845_PM01G12320	0.129969	-0.392918	normal	4.51107e-05	-1.29606	down	8.59245e-17	-1.77023	down	6.793e-09	-1.79172	down	0.000108508	1.36413	up
gene-C2845_PM01G12340	2.33753e-09	1.10795	up	1.86273e-15	1.36457	up	1.2255e-11	1.10214	up	0.225509	0.226928	normal	0.12185	0.836585	normal
gene-C2845_PM01G12370	0.00230349	0.422999	normal	2.09743e-07	0.829531	up	2.62869e-14	1.22549	up	1.35542e-10	1.40474	up	0.661504	0.121897	normal
gene-C2845_PM01G12420	4.34171e-08	0.836806	up	1.27374e-14	1.06757	up	3.19714e-20	1.17077	up	0.0809371	0.401856	normal	0.851425	-0.0766734	normal
gene-C2845_PM01G12480	0.232014	0.234502	normal	0.00366338	0.610508	up	1.2373e-05	0.735275	up	9.09089e-06	0.90202	up	0.72162	-0.192684	normal
gene-C2845_PM01G12500	0.00228155	0.427862	normal	2.24892e-05	0.575343	normal	2.63403e-10	0.97667	up	8.84104e-08	0.892322	up	0.549882	0.190777	normal
gene-C2845_PM01G12520	0.956751	0.0163825	normal	0.166745	0.271949	normal	0.000980976	0.534742	normal	0.000943747	0.605327	up	0.378685	-0.19646	normal
gene-C2845_PM01G12570	0.00258634	0.558611	normal	8.40075e-08	0.876982	up	4.61962e-12	1.13875	up	1.8121e-10	1.12599	up	0.0288496	0.702941	normal
gene-C2845_PM01G12660	0.424894	-0.394943	normal	0.0067033	-0.850929	down	0.000166829	-1.18948	down	0.0193862	-0.738462	normal	4.1039e-05	1.20473	up
gene-C2845_PM01G12690	0.102115	0.42111	normal	0.00108748	0.843037	up	5.09655e-08	1.35728	up	5.02306e-07	1.28944	up	0.898731	0.0709576	normal
gene-C2845_PM01G12710	0.509421	0.659037	normal	0.00204549	2.12448	up	0.000161865	2.30101	up	0.00554123	2.10701	up	--	--	--
gene-C2845_PM01G12730	0.00283217	1.00168	up	0.00751884	1.09529	up	0.0095436	1.01211	up	0.00560083	-1.23469	down	0.79555	-0.270497	normal
gene-C2845_PM01G12740	2.15875e-08	1.24315	up	1.63873e-24	2.13504	up	6.68363e-32	2.21649	up	1.75486e-20	1.97981	up	0.00788702	0.578221	normal
gene-C2845_PM01G12760	0.682702	0.303016	normal	0.825961	0.221916	normal	0.806549	0.169751	normal	0.648909	0.306903	normal	5.97615e-12	3.41257	up
gene-C2845_PM01G12770	1.17942e-12	1.3757	up	1.58476e-26	1.83798	up	3.43204e-08	1.09751	up	0.225065	-0.268878	normal	0.51045	-0.349018	normal
gene-C2845_PM01G12820	0.0120462	1.18775	normal	2.33653e-05	1.86142	up	--	--	--	--	--	--	--	--	--
gene-C2845_PM01G12840	1.03898e-07	1.47351	up	9.65135e-13	1.8588	up	4.40842e-11	1.73813	up	0.00179458	1.03491	up	0.00253164	1.40692	up
gene-C2845_PM01G12850	1.69921e-07	1.17719	up	1.46485e-21	1.79641	up	1.78651e-38	2.38995	up	1.19314e-11	2.10465	up	0.432989	0.252282	normal
gene-C2845_PM01G12860	0.000576222	0.772265	up	2.42744e-14	1.81388	up	8.75167e-46	2.36101	up	2.84402e-19	2.39381	up	0.0284475	0.761427	normal
gene-C2845_PM01G12920	5.64678e-08	1.98115	up	3.04369e-08	2.00009	up	4.58972e-09	2.00096	up	0.708144	0.171906	normal	0.00317493	1.51696	up
gene-C2845_PM01G12930	--	--	--	--	--	--	--	--	--	0.00019275	1.79995	up	4.79709e-05	2.30746	up
gene-C2845_PM01G13010	1.43865e-06	1.16819	up	8.6147e-30	1.99764	up	1.17863e-47	2.19897	up	3.31996e-08	1.50502	up	0.835397	-0.0862496	normal
gene-C2845_PM01G13040	0.00189451	0.411248	normal	2.7033e-06	0.689343	up	4.63056e-10	0.991446	up	0.0302962	0.494503	normal	0.350251	-0.168607	normal
gene-C2845_PM01G13050	2.80504e-07	2.56426	up	5.05258e-08	2.463	up	1.28346e-27	3.52302	up	1.38097e-15	4.08138	up	--	--	--
gene-C2845_PM01G13070	0.000112029	1.18186	up	0.229373	0.6559	normal	9.2722e-05	1.02077	up	0.850591	0.0590666	normal	0.0658567	-1.05175	normal
gene-C2845_PM01G13080	1.00722e-10	2.12833	up	1.75203e-06	2.24453	up	9.28698e-18	3.0444	up	7.39212e-16	3.00542	up	0.973912	-0.0533842	normal
gene-C2845_PM01G13090	7.69409e-06	1.92334	up	0.000167177	2.12018	up	5.36456e-07	2.5939	up	6.30534e-11	3.46027	up	0.316817	1.14327	normal
gene-C2845_PM01G13120	2.5795e-40	4.66711	up	2.48183e-52	5.37719	up	1.65294e-67	5.70727	up	2.76929e-39	5.07258	up	0.40288	0.669534	normal
gene-C2845_PM01G13130	0.0717261	0.736577	normal	2.46187e-18	1.89848	up	9.67784e-28	2.50206	up	6.57713e-24	2.40306	up	0.990999	0.00748265	normal
gene-C2845_PM01G13150	1.60882e-08	1.28592	up	3.17898e-08	1.68748	up	2.06706e-05	1.16225	up	0.122133	0.504123	normal	0.157215	-1.7832	normal
gene-C2845_PM01G13170	3.28646e-05	1.3547	up	0.00169398	1.32743	up	0.0721238	0.76242	normal	0.22421	0.539392	normal	0.0954414	0.970148	normal
gene-C2845_PM01G13210	5.81459e-07	0.770403	up	1.20151e-11	1.34186	up	1.31023e-25	1.53329	up	3.38687e-06	0.897121	up	0.384085	0.219695	normal
gene-C2845_PM01G13240	0.860974	-0.0372356	normal	0.118254	0.239871	normal	4.39072e-07	0.702276	up	0.000492421	0.772462	up	0.793766	-0.0691308	normal
gene-C2845_PM01G13270	0.225427	0.439473	normal	0.128526	0.552371	normal	4.05056e-05	1.19092	up	3.59428e-07	1.56449	up	0.509272	0.359647	normal
gene-C2845_PM01G13280	0.380136	0.402017	normal	0.121635	0.551669	normal	0.0031805	0.92501	up	2.21969e-06	1.54237	up	0.768986	0.177421	normal
gene-C2845_PM01G13290	6.08273e-05	1.25468	up	0.026081	0.877215	normal	0.010125	0.807698	normal	0.625348	-0.211585	normal	0.383515	0.497159	normal
gene-C2845_PM01G13310	0.00272973	1.09334	up	0.000131941	1.34044	up	4.36337e-20	2.8211	up	1.59433e-10	3.03927	up	0.709683	-0.251997	normal
gene-C2845_PM01G13350	0.499682	0.399153	normal	0.94227	-0.0555571	normal	0.00911839	1.25219	up	0.87963	0.118852	normal	0.653989	-0.734037	normal
gene-C2845_PM01G13380	1.09075e-05	1.73654	up	3.00647e-23	2.9701	up	3.73301e-45	3.66461	up	3.84742e-38	4.12574	up	0.80218	0.224511	normal
gene-C2845_PM01G13390	0.00126807	0.591898	up	5.18294e-05	0.783479	up	0.000616002	0.689721	up	1.1342e-09	1.20059	up	0.229358	-0.297638	normal
gene-C2845_PM01G13450	0.463413	0.19263	normal	0.0411739	0.52197	normal	0.000153538	0.822689	up	0.00197244	0.789997	up	0.298124	0.514039	normal
gene-C2845_PM01G13460	5.83185e-10	1.31769	up	1.24338e-10	2.05028	up	5.5866e-23	1.93907	up	7.23375e-24	1.85278	up	2.76239e-06	1.7417	up
gene-C2845_PM01G13470	0.482662	0.196202	normal	0.784354	0.0857767	normal	0.210736	0.31888	normal	4.69535e-07	1.05286	up	0.671117	-0.177512	normal
gene-C2845_PM01G13500	0.743688	0.129184	normal	0.0411449	0.903928	normal	0.497128	0.243641	normal	0.00135591	1.14248	up	3.28124e-07	-1.921	down
gene-C2845_PM01G13570	0.468761	0.251378	normal	0.0677167	0.434434	normal	0.00243868	0.70652	up	1.22254e-11	1.55807	up	0.473727	0.291622	normal
gene-C2845_PM01G13580	2.39809e-14	1.31198	up	7.30363e-36	1.7942	up	6.43751e-23	1.94018	up	9.53502e-08	1.62427	up	0.00189638	0.652958	up
gene-C2845_PM01G13590	0.00708055	0.793127	up	6.70207e-05	1.25587	up	2.80817e-14	1.75919	up	1.17557e-23	2.41762	up	0.000108077	1.4762	up
gene-C2845_PM01G13650	--	--	--	--	--	--	--	--	--	3.38606e-08	4.6503	up	--	--	--
gene-C2845_PM01G13670	0.283029	0.37118	normal	0.00400087	0.633281	up	4.76998e-06	1.16315	up	2.66975e-06	1.16473	up	0.099674	-0.479307	normal
gene-C2845_PM01G13700	2.13094e-07	0.739536	up	7.18916e-12	0.991604	up	1.0769e-18	1.12916	up	0.0112508	0.510117	normal	0.596671	0.146976	normal
gene-C2845_PM01G13710	0.00237121	0.664317	up	0.938322	0.0331375	normal	0.597652	-0.173949	normal	4.43708e-05	-1.20491	down	0.709186	-0.184895	normal
gene-C2845_PM01G13740	0.886882	0.0481392	normal	0.597035	0.154932	normal	0.633208	0.116823	normal	0.982205	0.00692992	normal	2.66158e-07	1.34774	up
gene-C2845_PM01G13750	1.69841e-07	1.00143	up	3.11709e-16	1.4277	up	2.56607e-15	1.32212	up	0.178899	0.395946	normal	0.00679187	0.607331	up
gene-C2845_PM01G13790	2.24682e-26	2.02036	up	1.18365e-32	2.31194	up	4.43493e-46	2.71408	up	3.58206e-07	1.71765	up	0.000667804	1.05106	up
gene-C2845_PM01G13800	0.00763444	1.23188	up	0.00101007	1.44891	up	1.01101e-06	2.25916	up	5.70114e-05	2.12501	up	0.292731	0.746348	normal
gene-C2845_PM01G13810	3.80537e-21	2.46754	up	3.29906e-42	3.39764	up	1.05075e-40	3.83294	up	1.09881e-14	2.58835	up	0.0369156	0.800469	normal
gene-C2845_PM01G13820	1.21072e-19	1.26644	up	4.91856e-24	1.75535	up	3.32033e-42	2.00256	up	2.9781e-15	1.50988	up	0.122308	0.467813	normal
gene-C2845_PM01G13830	0.417712	0.201345	normal	0.513509	0.16476	normal	0.0646199	0.446093	normal	0.00048102	1.03205	up	0.215147	0.421176	normal
gene-C2845_PM01G13840	1.62859e-16	1.99759	up	2.45699e-30	2.80503	up	1.94189e-41	3.16076	up	3.32931e-16	2.56154	up	2.74092e-13	2.32508	up
gene-C2845_PM01G13850	6.09853e-07	1.1635	up	1.78019e-16	2.05414	up	5.10334e-16	1.97471	up	7.10912e-15	2.22385	up	0.0777834	0.533086	normal
gene-C2845_PM01G13860	1.66914e-12	1.75387	up	3.0379e-11	1.7796	up	2.45385e-42	2.88892	up	3.60392e-18	2.50085	up	1.95129e-14	3.288	up
gene-C2845_PM01G13880	--	--	--	--	--	--	0.00245649	1.44547	up	0.0001361	1.85497	up	0.354812	0.631233	normal
gene-C2845_PM01G13930	0.337624	0.264811	normal	0.00205571	0.77554	up	0.0120857	0.578567	normal	0.386496	-0.242114	normal	0.26658	-0.609712	normal
gene-C2845_PM01G13940	0.140669	0.640327	normal	0.0025292	1.24639	up	0.00812161	0.92031	up	0.708945	0.149317	normal	0.156267	-0.899106	normal
gene-C2845_PM01G14010	1.16747e-16	2.61914	up	3.9878e-30	3.48452	up	4.43676e-42	3.87485	up	3.29578e-07	1.79688	up	0.00808641	1.47312	up
gene-C2845_PM01G14020	8.67229e-15	4.01738	up	3.53423e-25	5.33729	up	4.93104e-33	5.35175	up	5.89001e-32	5.84442	up	0.0543567	2.13128	normal
gene-C2845_PM01G14030	0.0254309	0.389981	normal	0.177668	0.219029	normal	0.218949	0.235252	normal	1.6862e-06	0.784539	up	0.425539	0.214537	normal
gene-C2845_PM01G14060	--	--	--	--	--	--	7.57873e-26	4.51	up	8.06113e-25	5.60016	up	--	--	--
gene-C2845_PM01G14070	0.000148502	-1.29403	down	0.804993	-0.109899	normal	0.521315	0.263854	normal	3.40065e-24	2.93852	up	0.838654	-0.207236	normal
gene-C2845_PM01G14120	1.1969e-06	0.772449	up	1.09033e-10	1.0975	up	1.77521e-11	1.09625	up	0.468876	-0.165465	normal	0.251293	0.508292	normal
gene-C2845_PM01G14130	0.261403	-0.216335	normal	0.021669	-0.50852	normal	8.28934e-06	-0.802243	down	0.448833	0.158752	normal	0.000119184	0.641587	up
gene-C2845_PM01G14160	0.000384728	0.806228	up	3.55352e-10	1.17111	up	8.01038e-41	1.81611	up	3.09311e-10	1.4537	up	0.00128957	0.646729	up
gene-C2845_PM01G14210	0.508737	-0.221832	normal	0.482978	0.211406	normal	0.174548	0.314609	normal	7.38158e-05	0.854591	up	0.989325	-0.00566053	normal
gene-C2845_PM01G14260	0.0111331	0.485164	normal	0.000138268	0.696301	up	4.33027e-09	0.9843	up	0.00286609	0.648767	up	0.0291096	0.546085	normal
gene-C2845_PM01G14300	0.0789115	0.616547	normal	0.00019234	1.14153	up	0.193026	0.462058	normal	0.322625	0.408471	normal	0.502722	-0.913248	normal
gene-C2845_PM01G14340	2.10582e-05	0.775337	up	3.11942e-17	1.05644	up	4.0641e-21	1.55555	up	0.000129617	0.858573	up	0.930101	0.0404025	normal
gene-C2845_PM01G14410	0.0121079	0.454605	normal	0.00417442	0.529852	normal	9.77757e-05	-0.720626	down	6.18145e-09	-1.30263	down	5.21053e-08	2.2949	up
gene-C2845_PM01G14480	0.106806	0.28013	normal	2.56732e-05	0.62197	up	5.2568e-05	0.73511	up	0.000807901	0.54753	normal	0.996588	0.00176833	normal
gene-C2845_PM01G14500	--	--	--	--	--	--	--	--	--	1.19092e-05	2.32605	up	--	--	--
gene-C2845_PM01G14560	4.59604e-05	1.9803	up	4.74121e-08	2.90835	up	3.26624e-08	2.72809	up	6.33e-16	3.91878	up	0.00441287	2.5555	up
gene-C2845_PM01G14570	--	--	--	--	--	--	--	--	--	--	--	--	5.41036e-08	5.13449	up
gene-C2845_PM01G14790	0.279758	-0.467714	normal	0.566459	-0.246023	normal	0.465559	-0.36513	normal	0.101215	-0.776238	normal	0.00109084	1.40646	up
gene-C2845_PM01G14810	0.00832742	0.44661	normal	4.1857e-08	0.966479	up	9.8164e-19	1.4008	up	4.02117e-07	1.1316	up	0.942001	-0.0203668	normal
gene-C2845_PM01G14870	0.0341685	0.362167	normal	0.000228179	0.526956	normal	0.927439	-0.0233959	normal	0.014968	-0.440559	normal	5.66169e-24	1.34834	up
gene-C2845_PM01G14910	0.37278	0.304116	normal	2.28046e-05	1.08075	up	2.91872e-07	1.37372	up	3.98577e-07	1.41673	up	0.0109975	0.809719	normal
gene-C2845_PM01G15030	0.0803915	0.378938	normal	2.00134e-06	0.777866	up	4.36739e-05	0.826961	up	0.836456	0.0769389	normal	0.00879077	0.970958	up
gene-C2845_PM01G15080	0.00602532	0.780655	up	2.63775e-06	1.12029	up	9.57163e-14	1.53018	up	1.78348e-14	1.70112	up	0.368028	-0.403173	normal
gene-C2845_PM01G15150	1.4507e-08	2.15303	up	9.66966e-11	2.22774	up	2.88844e-13	2.34504	up	7.2849e-07	1.80527	up	0.162634	1.12858	normal
gene-C2845_PM01G15250	7.53236e-10	1.88096	up	7.75256e-06	1.34881	up	0.00657662	0.911666	up	0.105343	-0.619877	normal	0.440826	0.436626	normal
gene-C2845_PM01G15460	3.21992e-10	1.16598	up	1.07261e-12	1.37041	up	2.886e-18	1.65794	up	3.23515e-10	1.52702	up	0.959733	-0.0234013	normal
gene-C2845_PM01G15510	3.08021e-14	1.59286	up	8.17194e-25	2.84425	up	9.61157e-45	3.21523	up	2.40156e-10	2.29109	up	0.740225	0.141693	normal
gene-C2845_PM01G15520	0.109657	0.358073	normal	0.00100956	0.647435	up	1.2139e-09	1.16285	up	0.0177527	0.842835	normal	0.00672072	0.767196	up
gene-C2845_PM01G15560	0.0516531	0.435966	normal	1.03819e-06	0.976435	up	5.50996e-08	1.18175	up	2.64488e-06	1.08586	up	0.317848	0.292995	normal
gene-C2845_PM01G15650	0.423343	-0.182862	normal	0.862391	-0.0360978	normal	0.0915343	0.341509	normal	0.00220639	0.601349	up	0.00527994	0.755134	up
gene-C2845_PM01G15660	0.146667	0.501136	normal	0.00855865	0.963266	up	0.0706829	0.478442	normal	0.00671361	-1.04813	down	0.536971	-0.498804	normal
[truncated: 11,118 more rows]

## Sheet: down-regulated 
#ID	CK_vs_D1_DESeq2_FDR	CK_vs_D1_DESeq2_log2FC	CK_vs_D1_DESeq2_(FDR_0.01_FC_1.5)_regulated	CK_vs_D2_DESeq2_FDR	CK_vs_D2_DESeq2_log2FC	CK_vs_D2_DESeq2_(FDR_0.01_FC_1.5)_regulated	CK_vs_D3_DESeq2_FDR	CK_vs_D3_DESeq2_log2FC	CK_vs_D3_DESeq2_(FDR_0.01_FC_1.5)_regulated	CK_vs_D4_DESeq2_FDR	CK_vs_D4_DESeq2_log2FC	CK_vs_D4_DESeq2_(FDR_0.01_FC_1.5)_regulated	CK_vs_R1_DESeq2_FDR	CK_vs_R1_DESeq2_log2FC	CK_vs_R1_DESeq2_(FDR_0.01_FC_1.5)_regulated
Panicum_miliaceum_newGene_10016	0.0755271	-0.79719	normal	0.00127109	-1.09809	down	0.00225951	-1.22096	down	1.76994e-08	-1.74223	down	0.723164	0.207192	normal
Panicum_miliaceum_newGene_10017	0.00693593	-0.774904	down	0.0137243	-0.780167	normal	0.0208587	-0.938216	normal	9.49912e-06	-2.31541	down	6.99735e-12	2.59151	up
Panicum_miliaceum_newGene_10033	0.694323	-0.175612	normal	0.017787	-0.858249	normal	0.000737495	-1.12969	down	0.0545801	-0.609427	normal	0.0298972	0.829208	normal
Panicum_miliaceum_newGene_10039	3.22874e-05	-0.923133	down	0.00055906	-1.34468	down	2.99537e-07	-1.31467	down	1.81251e-10	-2.86388	down	1.10041e-15	-3.03387	down
Panicum_miliaceum_newGene_10042	0.958204	-0.0193865	normal	0.0252801	0.508242	normal	0.352924	0.25069	normal	0.596959	-0.163341	normal	0.00806789	-0.740304	down
Panicum_miliaceum_newGene_10047	0.023776	0.724395	normal	0.00394091	0.745105	up	0.497275	0.233991	normal	0.000169457	-1.58965	down	2.30828e-18	-4.01842	down
Panicum_miliaceum_newGene_10050	0.00836844	-0.740903	down	0.00244652	-1.16565	down	0.00357623	-1.0362	down	0.0286434	-0.651446	normal	0.425885	0.33307	normal
Panicum_miliaceum_newGene_1006	0.594781	-0.483994	normal	0.0681084	-1.51985	normal	0.000286693	-2.168	down	0.806927	0.199787	normal	0.141609	-2.02405	normal
Panicum_miliaceum_newGene_10095	0.0291374	-0.423278	normal	0.000793595	-0.650498	down	0.361446	-0.23777	normal	0.0985444	-0.369531	normal	0.451954	0.298148	normal
Panicum_miliaceum_newGene_1010	0.00264604	-1.10014	down	1.38215e-07	-2.2419	down	5.99912e-11	-3.25476	down	7.43419e-14	-3.72908	down	0.584804	-0.388511	normal
Panicum_miliaceum_newGene_10109	0.245251	-0.45514	normal	5.94923e-06	-1.3547	down	2.57336e-06	-1.36896	down	0.0145648	-0.913117	normal	0.536022	0.283369	normal
Panicum_miliaceum_newGene_1011	0.952488	-0.0876954	normal	0.476194	-1.52262	normal	0.00272353	-2.02317	down	0.0261179	-1.40562	normal	0.492941	-0.641556	normal
Panicum_miliaceum_newGene_10115	0.00444649	-0.675191	down	0.00234493	-0.676938	down	0.471817	-0.208776	normal	0.977231	-0.0128177	normal	0.558495	0.236754	normal
Panicum_miliaceum_newGene_10124	9.95694e-11	-1.4265	down	2.87669e-11	-1.76505	down	3.50272e-26	-2.73626	down	2.00479e-07	-2.82428	down	0.00178088	-1.92984	down
Panicum_miliaceum_newGene_10155	0.651664	-0.160286	normal	0.00450617	-0.814017	down	0.0265849	-0.654795	normal	6.06459e-05	-1.07701	down	0.675588	0.191086	normal
Panicum_miliaceum_newGene_10158	0.0977971	-0.682607	normal	0.0285764	-1.28774	normal	0.0322362	-1.82983	normal	0.00811392	-1.54262	down	0.00753177	-1.23611	down
Panicum_miliaceum_newGene_10164	0.369334	-0.729941	normal	0.0544088	-1.51229	normal	0.0841818	-1.12545	normal	5.74355e-05	-2.74948	down	0.584318	-0.788089	normal
Panicum_miliaceum_newGene_10180	0.00680363	-0.671109	down	0.0241853	-0.687069	normal	0.00395933	-0.856145	down	0.00148133	-0.831841	down	0.813977	0.0897877	normal
Panicum_miliaceum_newGene_10210	0.954091	0.0239558	normal	0.115037	-0.260172	normal	5.19565e-06	-0.796324	down	3.48048e-06	-1.18582	down	0.00891871	-0.726335	down
Panicum_miliaceum_newGene_10219	0.883962	-0.085273	normal	0.374886	0.356253	normal	0.348601	0.373396	normal	0.213683	-0.754258	normal	5.58096e-05	-1.92274	down
Panicum_miliaceum_newGene_1023	0.678472	-0.162868	normal	0.806518	0.0947029	normal	0.198071	-0.667365	normal	0.00151899	-1.07032	down	0.45953	-1.01026	normal
Panicum_miliaceum_newGene_1024	0.000511529	-1.19254	down	0.00585444	-1.89581	down	3.66332e-06	-2.29649	down	0.0193443	-1.21056	normal	0.707498	-0.207367	normal
Panicum_miliaceum_newGene_10256	0.000208053	-2.03795	down	0.00291161	-2.03789	down	9.2953e-14	-3.5925	down	5.68512e-05	-3.6678	down	0.0414209	-2.12024	normal
Panicum_miliaceum_newGene_10263	0.898304	0.0649152	normal	0.0099464	-1.0004	down	0.671271	-0.171506	normal	0.275365	-0.490047	normal	0.922204	0.0622923	normal
Panicum_miliaceum_newGene_10281	0.18686	-1.3058	normal	0.0764895	-1.49434	normal	3.21001e-05	-4.09896	down	0.0316109	-1.56032	normal	0.294416	-2.06957	normal
Panicum_miliaceum_newGene_10315	0.0555371	-0.368973	normal	0.000496032	-0.725993	down	0.00282768	-0.610311	down	0.0111639	-0.475898	normal	0.566028	-0.141393	normal
Panicum_miliaceum_newGene_10327	0.243259	-0.307656	normal	0.0327443	-0.486364	normal	0.000920491	-0.930185	down	0.0769098	-0.638314	normal	0.570481	-0.167548	normal
Panicum_miliaceum_newGene_10330	2.56118e-06	-1.26845	down	4.14746e-19	-3.01993	down	2.05026e-13	-2.38143	down	1.13119e-23	-3.91596	down	1.2311e-08	-2.00058	down
Panicum_miliaceum_newGene_10346	0.43702	-0.302515	normal	0.22176	-0.336499	normal	0.000189856	-1.13105	down	0.0383705	-1.12391	normal	0.064461	0.589465	normal
Panicum_miliaceum_newGene_10362	0.301938	-0.384897	normal	0.0882622	-1.12384	normal	0.00251118	-1.21661	down	0.00160908	-1.11117	down	0.289585	0.529384	normal
Panicum_miliaceum_newGene_10386	0.186409	-0.251111	normal	0.166907	-0.273198	normal	0.0150678	-0.457924	normal	0.000195406	-0.685493	down	0.884837	-0.0515451	normal
Panicum_miliaceum_newGene_10393	0.692042	0.131244	normal	0.205782	0.463963	normal	0.757209	0.117684	normal	1.54003e-09	-1.49412	down	0.000270228	-1.6337	down
Panicum_miliaceum_newGene_10407	0.329608	-0.352739	normal	0.0642191	-0.578612	normal	0.0247265	-0.737458	normal	0.00132166	-1.10736	down	0.400161	-0.321157	normal
Panicum_miliaceum_newGene_10408	0.000307015	0.83296	up	2.39824e-05	1.12764	up	0.000536049	0.84047	up	0.00020011	-1.39674	down	0.763477	-0.321643	normal
Panicum_miliaceum_newGene_10417	0.666476	-0.128533	normal	0.000132317	-0.817024	down	1.05232e-08	-1.06745	down	9.28468e-07	-0.959621	down	0.854952	-0.0553548	normal
Panicum_miliaceum_newGene_10423	0.0354343	-0.853409	normal	8.0718e-09	-1.79743	down	1.0499e-06	-1.41234	down	2.48412e-08	-1.78052	down	0.639078	-0.313733	normal
Panicum_miliaceum_newGene_10441	0.801608	-0.319958	normal	0.852689	-0.290508	normal	1.28337e-08	-2.56703	down	0.706536	0.253951	normal	0.128675	-1.50843	normal
Panicum_miliaceum_newGene_10455	0.000837978	-1.0926	down	1.10188e-07	-2.07803	down	2.41127e-08	-1.98025	down	4.12021e-07	-1.93285	down	0.632852	0.167143	normal
Panicum_miliaceum_newGene_1046	0.262029	-0.718125	normal	0.0862965	-1.09518	normal	0.44412	-0.6605	normal	0.00333096	-2.00519	down	0.199941	-1.12757	normal
Panicum_miliaceum_newGene_10460	0.0035479	-0.896938	down	0.668248	-0.156489	normal	0.000319158	1.1522	up	5.77208e-28	3.82271	up	1.03571e-06	1.70602	up
Panicum_miliaceum_newGene_10470	0.373787	-0.295533	normal	0.298369	-0.425942	normal	0.499317	-0.468907	normal	0.000369006	-1.1031	down	0.988815	0.00887986	normal
Panicum_miliaceum_newGene_10471	0.894072	-0.0715701	normal	0.0499968	-0.889962	normal	4.95984e-06	-1.95559	down	2.64936e-14	-2.63296	down	6.62058e-06	1.44809	up
Panicum_miliaceum_newGene_10518	0.478712	-0.326146	normal	0.00435566	0.919298	up	0.0194193	1.29714	normal	0.0114283	1.33264	normal	0.0093891	-1.26581	down
Panicum_miliaceum_newGene_10521	0.128941	-0.413706	normal	2.07004e-05	-0.980095	down	0.32347	-0.196518	normal	0.76201	0.0805784	normal	0.851058	0.0671949	normal
Panicum_miliaceum_newGene_10522	0.00160281	-1.27617	down	0.571565	-0.202002	normal	0.527755	0.20475	normal	0.209027	0.420652	normal	0.788714	0.174638	normal
Panicum_miliaceum_newGene_10539	0.00352	-1.63261	down	0.00127285	-2.28027	down	1.62799e-05	-2.88153	down	0.0205495	-1.13785	normal	0.322419	0.533062	normal
Panicum_miliaceum_newGene_10543	1.57741e-06	-1.537	down	8.96175e-18	-2.52287	down	1.89603e-11	-2.17473	down	2.50526e-09	-1.78617	down	0.766202	0.115948	normal
Panicum_miliaceum_newGene_10551	0.082993	-0.571696	normal	0.000942128	-1.27436	down	0.00259557	-1.19062	down	0.024464	-0.787666	normal	0.232166	-0.592098	normal
Panicum_miliaceum_newGene_10567	8.42639e-05	-0.847082	down	9.48032e-13	-1.80018	down	2.63883e-05	-1.19927	down	6.23854e-08	-1.92455	down	0.675843	0.177054	normal
Panicum_miliaceum_newGene_10571	0.769717	-0.168566	normal	0.113006	-0.655869	normal	0.957745	0.0255589	normal	0.347617	-0.412722	normal	0.000472481	-1.74847	down
Panicum_miliaceum_newGene_10587	0.00491759	-1.69579	down	0.0116225	-2.19604	normal	0.0333582	-1.26927	normal	0.00219482	-2.05839	down	0.076623	-1.24312	normal
Panicum_miliaceum_newGene_10602	5.30368e-05	-1.45763	down	9.09681e-08	-2.75554	down	3.30461e-08	-2.60161	down	0.000119453	-2.09252	down	0.600946	0.257309	normal
Panicum_miliaceum_newGene_10643	3.95464e-07	-1.25493	down	0.000714062	-1.32683	down	3.77094e-06	-1.423	down	6.21214e-06	-1.50735	down	1.52926e-05	-1.61467	down
Panicum_miliaceum_newGene_10657	0.00399568	-0.924766	down	0.245897	-0.401159	normal	0.0592782	-0.580158	normal	0.000123453	-1.18083	down	0.0779293	-1.00842	normal
Panicum_miliaceum_newGene_10661	0.210941	-0.391286	normal	0.150305	-0.400737	normal	0.0134888	-0.648874	normal	0.00400056	-0.816051	down	0.598614	-0.520229	normal
Panicum_miliaceum_newGene_10685	0.217218	-0.241125	normal	0.0502666	-0.419543	normal	0.000130813	-0.767358	down	0.00710861	-0.534429	normal	0.794571	-0.0992947	normal
Panicum_miliaceum_newGene_10688	0.16352	-0.70507	normal	0.00320629	-1.63172	down	0.138866	-0.76495	normal	0.0130744	-1.23449	normal	0.432912	-0.516273	normal
Panicum_miliaceum_newGene_10689	0.00231915	-0.810157	down	0.000341854	-0.888047	down	0.00564525	-0.683178	down	0.690841	-0.116199	normal	0.787268	-0.113911	normal
Panicum_miliaceum_newGene_10691	0.241392	-0.746495	normal	0.21166	-0.971332	normal	0.000680658	-1.82294	down	0.0646847	-1.14998	normal	0.423967	0.43149	normal
Panicum_miliaceum_newGene_10698	0.160796	-0.365762	normal	0.179267	-0.428944	normal	0.0221284	-0.63955	normal	0.00116627	-0.856515	down	0.3366	-0.350405	normal
Panicum_miliaceum_newGene_10710	0.276869	-0.216441	normal	0.101365	-0.316522	normal	0.0691685	-0.374034	normal	3.3035e-06	-0.888483	down	0.499588	0.159156	normal
Panicum_miliaceum_newGene_10732	0.0141363	-0.61166	normal	0.02633	-0.652678	normal	0.113454	-0.488684	normal	2.39033e-05	-1.26363	down	0.492858	0.309773	normal
Panicum_miliaceum_newGene_10763	0.277267	-0.289038	normal	0.0247578	-0.50604	normal	0.00532796	-0.71479	down	0.0103833	-0.788459	normal	0.432311	-0.71136	normal
Panicum_miliaceum_newGene_10768	0.187411	-0.353245	normal	0.00185965	-0.789457	down	1.36633e-08	-1.32132	down	0.158661	-0.347424	normal	0.579505	-0.189311	normal
Panicum_miliaceum_newGene_10787	0.111647	-0.477061	normal	0.243634	-0.398814	normal	0.0361748	-0.654302	normal	0.000801681	-1.02669	down	0.672006	-0.159889	normal
Panicum_miliaceum_newGene_1081	0.00549094	-0.487705	normal	3.52096e-08	-0.876494	down	0.000133838	-0.748526	down	0.000162752	-0.855377	down	0.140539	0.438906	normal
Panicum_miliaceum_newGene_10812	0.000251016	-1.05001	down	2.05465e-11	-2.56011	down	0.00523614	-2.50545	down	8.16634e-12	-3.41994	down	0.629992	-0.744043	normal
Panicum_miliaceum_newGene_10824	4.45418e-15	-3.78682	down	1.01039e-12	-5.77984	down	1.01543e-09	-7.04753	down	1.95828e-14	-5.24357	down	0.0032842	-3.30928	down
Panicum_miliaceum_newGene_10846	0.000287718	-0.446731	normal	0.00163562	-0.544129	normal	4.28167e-06	-0.711826	down	0.0068994	-0.540313	normal	0.853002	-0.0556176	normal
Panicum_miliaceum_newGene_1086	0.00301946	-0.707375	down	0.00128891	-0.701675	down	0.000418508	-1.08317	down	0.381777	-0.210302	normal	0.00226528	0.795184	up
Panicum_miliaceum_newGene_10878	0.384819	-0.190101	normal	0.00323424	-0.600978	down	0.00511873	-0.97598	down	4.53013e-06	-1.41232	down	0.886338	-0.0574137	normal
Panicum_miliaceum_newGene_10879	0.555512	0.196257	normal	0.0234403	0.531475	normal	0.000754634	0.660176	up	0.484047	0.263697	normal	4.75536e-07	-2.33617	down
Panicum_miliaceum_newGene_10880	0.00460512	-0.545459	normal	0.000345296	-0.667049	down	6.43436e-10	-1.17722	down	0.00205032	-0.666586	down	0.651622	0.108829	normal
Panicum_miliaceum_newGene_10888	0.00732951	-1.18807	down	0.00298312	-1.38321	down	2.48337e-12	-2.38178	down	0.000469561	-1.1049	down	0.527698	0.351478	normal
Panicum_miliaceum_newGene_10907	0.0570228	-0.643548	normal	0.00479191	-0.944699	down	0.00143224	-1.18337	down	1.529e-06	-1.7633	down	0.901332	-0.0896097	normal
Panicum_miliaceum_newGene_10920	0.0167386	-0.538315	normal	0.800122	-0.0807916	normal	0.141006	-0.372745	normal	4.21619e-05	-0.927705	down	0.65867	-0.276441	normal
Panicum_miliaceum_newGene_10928	0.0190394	-0.788265	normal	0.00532064	-1.01526	down	0.00494669	-0.854898	down	0.876786	0.0717562	normal	0.536393	0.420053	normal
Panicum_miliaceum_newGene_10955	0.610345	-0.24922	normal	0.784433	-0.162698	normal	0.0395781	-1.06815	normal	0.000690454	-1.88631	down	0.00644446	-2.1949	down
Panicum_miliaceum_newGene_10970	9.23792e-09	-2.48332	down	8.5879e-05	-1.98343	down	1.90953e-12	-3.86914	down	7.56948e-12	-4.33713	down	0.0658961	-1.33074	normal
Panicum_miliaceum_newGene_10974	0.0843965	-0.406683	normal	0.00198581	-0.694956	down	0.00021925	-0.920736	down	0.541367	-0.212782	normal	0.294928	-0.301239	normal
Panicum_miliaceum_newGene_10988	0.297475	-0.549831	normal	0.202174	-0.698757	normal	0.217481	-0.571257	normal	0.00494667	-1.33427	down	0.0532656	-1.19465	normal
Panicum_miliaceum_newGene_11	0.25281	-0.248536	normal	0.0133789	-0.451491	normal	1.66254e-05	-0.685569	down	0.00975703	-0.575746	normal	0.209249	-0.415753	normal
Panicum_miliaceum_newGene_11029	0.186226	-0.675801	normal	0.00151113	-1.41998	down	0.049611	-0.884278	normal	0.769043	-0.136653	normal	0.360635	-0.581957	normal
Panicum_miliaceum_newGene_11045	3.07384e-17	-1.42295	down	2.163e-85	-2.88455	down	4.01318e-72	-3.27408	down	6.03491e-81	-3.61532	down	0.00139771	-0.960848	down
Panicum_miliaceum_newGene_11049	0.0051678	-0.693988	down	0.0209219	-0.65736	normal	0.00032234	-1.32562	down	0.000216194	-1.21916	down	0.768271	-0.140624	normal
Panicum_miliaceum_newGene_11052	0.0189453	-0.770015	normal	0.000347913	-1.09714	down	3.50377e-05	-1.05846	down	5.23315e-08	-1.48966	down	0.15392	-0.729491	normal
Panicum_miliaceum_newGene_11062	0.224917	-0.610042	normal	1.19419e-05	-1.70231	down	4.50062e-05	-2.22343	down	0.000104216	-1.56546	down	0.484948	-0.432356	normal
Panicum_miliaceum_newGene_11113	3.75304e-07	-0.911513	down	9.16203e-09	-1.90449	down	9.66156e-13	-1.84028	down	5.61754e-10	-1.44591	down	0.177167	0.338829	normal
Panicum_miliaceum_newGene_11126	0.0192871	-0.792272	normal	0.0154119	-1.71436	normal	8.30834e-05	-1.41533	down	0.00264813	-1.24836	down	0.608633	0.199628	normal
Panicum_miliaceum_newGene_11128	0.0257497	-0.756765	normal	0.00474306	-1.31645	down	7.18016e-06	-1.62164	down	0.00497629	-0.946311	down	0.124122	-0.752873	normal
Panicum_miliaceum_newGene_11129	0.721855	-0.169862	normal	1.22735e-09	-1.41408	down	3.69797e-06	-1.56386	down	0.0248925	-0.630622	normal	3.91809e-07	2.05254	up
Panicum_miliaceum_newGene_11130	0.297271	-0.330809	normal	0.0298219	-0.703325	normal	0.0078057	-0.801179	down	0.137874	-0.476221	normal	0.973275	0.0271726	normal
Panicum_miliaceum_newGene_11142	2.81899e-09	-1.16052	down	8.75644e-07	-1.55572	down	4.63849e-17	-1.92711	down	1.49434e-13	-1.96611	down	0.415159	-0.462628	normal
Panicum_miliaceum_newGene_11147	0.344887	-0.203664	normal	0.0377193	-0.680141	normal	0.00196352	-0.730661	down	0.022745	-0.810754	normal	0.181244	-0.606076	normal
Panicum_miliaceum_newGene_11159	0.0698335	-1.09376	normal	0.00693246	-1.57034	down	0.185933	-0.688416	normal	0.000693135	-1.94991	down	0.701897	-0.361508	normal
Panicum_miliaceum_newGene_11160	0.983257	0.0139955	normal	0.111619	-1.15654	normal	9.0299e-05	-3.31204	down	0.180099	-0.716558	normal	0.404651	0.55164	normal
Panicum_miliaceum_newGene_11175	0.0356727	-0.540086	normal	0.00315014	-0.690312	down	0.0572276	-0.514498	normal	0.0152034	-0.526559	normal	0.657817	-0.157928	normal
Panicum_miliaceum_newGene_11200	1.01967e-05	-0.677993	down	3.648e-08	-1.22901	down	2.84289e-11	-1.33589	down	3.28172e-19	-1.5928	down	0.618154	-0.274727	normal
Panicum_miliaceum_newGene_11220	8.80224e-05	-0.985942	down	3.25925e-07	-1.46923	down	5.3396e-05	-1.09171	down	0.0328962	-0.582163	normal	0.0733218	0.596697	normal
Panicum_miliaceum_newGene_11250	0.0103596	-1.56344	normal	0.360567	-1.04993	normal	0.529847	-0.346468	normal	0.00221896	-2.1771	down	0.470891	0.507848	normal
Panicum_miliaceum_newGene_1132	0.22532	-1.07166	normal	0.0364774	-1.93375	normal	0.00256791	-2.15778	down	0.640165	0.381108	normal	0.275624	-1.64891	normal
Panicum_miliaceum_newGene_11329	2.90334e-06	1.09441	up	7.57585e-19	1.81192	up	3.23906e-12	1.91849	up	7.62072e-15	2.01158	up	0.000108472	-0.955947	down
Panicum_miliaceum_newGene_11335	0.0124547	-1.11029	normal	0.000136492	-1.7298	down	0.00178791	-1.80217	down	0.282777	-0.51831	normal	0.992978	0.00876596	normal
Panicum_miliaceum_newGene_11351	0.081378	-0.526303	normal	0.000225119	-0.909974	down	0.00493187	-0.654727	down	0.0546454	-0.493874	normal	0.415382	0.362343	normal
Panicum_miliaceum_newGene_11380	0.00547384	-0.860337	down	2.81608e-08	-1.89859	down	2.22267e-05	-1.52602	down	8.10913e-05	-1.24239	down	0.972989	-0.0167385	normal
Panicum_miliaceum_newGene_11393	0.62515	-0.337083	normal	0.384094	-0.398744	normal	0.114754	-0.876192	normal	0.00428414	-1.48289	down	0.984777	-0.0156159	normal
Panicum_miliaceum_newGene_11442	0.41394	-0.608353	normal	0.0098544	-1.62533	down	0.162093	-0.787159	normal	0.0354199	-1.45279	normal	0.269401	0.709026	normal
Panicum_miliaceum_newGene_11452	0.390076	-0.259355	normal	0.000876366	-0.819206	down	0.464914	-0.185966	normal	0.106879	-0.414807	normal	0.452487	0.279737	normal
Panicum_miliaceum_newGene_11457	6.51366e-07	-2.27548	down	8.22698e-08	-2.91813	down	3.62718e-07	-3.51714	down	3.12046e-12	-4.56961	down	0.158459	-0.916929	normal
Panicum_miliaceum_newGene_11463	0.0567162	-0.330702	normal	0.00012095	-0.705828	down	0.126902	-0.355342	normal	0.805493	0.0592294	normal	0.361266	0.421395	normal
Panicum_miliaceum_newGene_11469	6.43944e-09	-1.59863	down	9.18697e-17	-2.85677	down	7.53906e-10	-2.11875	down	8.63182e-07	-2.52443	down	0.943516	-0.0524004	normal
Panicum_miliaceum_newGene_11491	0.00262656	-1.13666	down	0.000222418	-1.81357	down	3.31181e-05	-1.82086	down	0.00198336	-1.11821	down	0.512435	0.284804	normal
Panicum_miliaceum_newGene_11502	0.0444675	-0.644283	normal	0.00222872	-1.27126	down	0.00171491	-1.18137	down	0.00874496	-0.795713	down	0.524333	0.272769	normal
Panicum_miliaceum_newGene_11507	0.180355	0.424606	normal	0.684199	0.161804	normal	0.547052	0.227596	normal	0.899093	0.072839	normal	0.00127865	-1.6697	down
Panicum_miliaceum_newGene_11518	0.00150551	-0.981235	down	0.0681952	-0.608252	normal	0.0976756	-0.574855	normal	0.778339	-0.11396	normal	0.680179	-0.196364	normal
Panicum_miliaceum_newGene_1152	0.447395	-0.603338	normal	0.804017	0.259783	normal	0.0233755	-1.36841	normal	0.00072882	-2.19862	down	0.585443	-0.841733	normal
Panicum_miliaceum_newGene_11526	9.93763e-12	-1.12782	down	1.75266e-20	-1.91532	down	1.55819e-38	-2.8083	down	4.51093e-48	-3.4742	down	0.849883	-0.117066	normal
Panicum_miliaceum_newGene_11528	0.00518444	-1.37448	down	6.09258e-06	-2.82684	down	0.00119305	-1.74437	down	0.000263286	-2.3211	down	0.101933	-1.89304	normal
Panicum_miliaceum_newGene_11533	0.97628	0.0187051	normal	0.84152	0.114049	normal	0.206374	-0.607952	normal	0.00341509	-1.56096	down	0.17596	-2.05782	normal
Panicum_miliaceum_newGene_11535	0.786155	0.103913	normal	0.00432228	-0.628251	down	0.000416585	-0.782628	down	0.566224	0.208304	normal	0.353599	-0.466878	normal
Panicum_miliaceum_newGene_11566	0.358844	-0.367933	normal	0.0343785	-0.758335	normal	0.0171335	-0.750727	normal	3.14308e-07	-2.05047	down	0.714581	-0.176914	normal
Panicum_miliaceum_newGene_11580	0.743009	-0.278804	normal	0.966521	0.0352696	normal	0.0153117	-1.98523	normal	0.00975203	-1.67423	down	0.538234	-1.24233	normal
Panicum_miliaceum_newGene_11604	1.54267e-05	-0.82286	down	5.42783e-13	-1.26266	down	2.7191e-11	-1.17088	down	3.26709e-07	-0.992271	down	0.710587	-0.448591	normal
Panicum_miliaceum_newGene_11635	0.00106983	-1.56332	down	0.0049085	-1.68619	down	0.0213781	-1.15454	normal	0.0245788	-1.3342	normal	0.130574	-0.915182	normal
Panicum_miliaceum_newGene_11662	0.178185	-0.622954	normal	0.0481442	-1.09164	normal	0.0183081	-1.16875	normal	2.64762e-05	-2.26307	down	0.389483	-0.546547	normal
Panicum_miliaceum_newGene_11664	0.659239	-0.284446	normal	0.1676	-0.821877	normal	0.0011428	-2.12057	down	4.92687e-07	-2.93406	down	0.424393	-0.983929	normal
Panicum_miliaceum_newGene_11695	1.48145e-13	-2.39556	down	0.00162845	-1.50324	down	2.9988e-10	-2.74049	down	7.65011e-14	-2.50499	down	0.867212	-0.276403	normal
Panicum_miliaceum_newGene_11700	0.18757	-1.10497	normal	0.194286	-0.97827	normal	0.0575986	-1.71041	normal	0.00844641	-2.31086	down	0.749956	-0.256516	normal
Panicum_miliaceum_newGene_11726	9.12702e-08	0.809127	up	1.04851e-09	1.15796	up	1.98436e-09	1.10576	up	0.7258	0.136089	normal	2.32539e-46	-2.60583	down
Panicum_miliaceum_newGene_11730	4.83079e-07	-7.203	down	3.08297e-06	-6.76094	down	0.000325229	-3.92287	down	6.12504e-05	-3.63095	down	0.293419	-1.65115	normal
Panicum_miliaceum_newGene_11751	0.581745	-0.179363	normal	0.00204473	-0.832508	down	0.0333921	-0.601808	normal	0.0483788	-0.563543	normal	0.0437625	0.674142	normal
Panicum_miliaceum_newGene_11759	0.0942143	-1.02566	normal	0.15154	-0.985191	normal	0.0383992	-1.61935	normal	7.16486e-05	-2.92909	down	0.932676	-0.0910231	normal
Panicum_miliaceum_newGene_11767	0.0237348	-0.463411	normal	2.56058e-08	-0.982697	down	1.08651e-07	-1.63539	down	6.81647e-18	-1.81925	down	0.00634476	-1.07543	down
Panicum_miliaceum_newGene_11768	0.147968	0.234615	normal	0.127309	-0.295416	normal	0.385449	-0.178294	normal	0.131074	-0.357033	normal	9.15496e-05	-1.02049	down
Panicum_miliaceum_newGene_11781	1.02291e-05	-1.34735	down	4.86371e-06	-1.38534	down	0.00062063	-0.939898	down	0.00844376	-0.842208	down	0.0248984	-0.840634	normal
Panicum_miliaceum_newGene_11782	0.144695	-0.507173	normal	0.00174771	-1.14597	down	0.00171898	-0.910847	down	0.017174	-0.749604	normal	0.350034	-0.328947	normal
Panicum_miliaceum_newGene_11815	0.00416139	-0.386561	normal	0.00437214	-0.412399	normal	2.76483e-10	-0.803787	down	0.000164069	-0.738569	down	0.471891	0.193733	normal
Panicum_miliaceum_newGene_11851	0.0993622	-0.399136	normal	2.31582e-06	-1.35175	down	2.70542e-06	-1.1643	down	6.46631e-05	-1.0647	down	0.56924	-0.213984	normal
Panicum_miliaceum_newGene_11854	0.489708	-0.434242	normal	0.00449379	-1.65213	down	0.0383118	-1.05118	normal	0.0629089	-0.960157	normal	0.000857497	-1.83281	down
Panicum_miliaceum_newGene_1187	0.27034	-0.751344	normal	0.324204	-0.868542	normal	0.0931771	-1.2215	normal	0.00817477	-1.59626	down	0.819222	-0.201982	normal
Panicum_miliaceum_newGene_11873	0.95925	-0.0147541	normal	0.00372432	-0.717412	down	0.521218	-0.163459	normal	0.895976	0.0561151	normal	0.000535685	-0.784051	down
Panicum_miliaceum_newGene_11898	0.0645714	-1.01089	normal	0.09301	-0.698449	normal	0.00363125	-0.935036	down	0.000997172	-1.80837	down	0.0457007	-1.69769	normal
Panicum_miliaceum_newGene_11900	0.16808	0.411653	normal	0.0330503	0.622362	normal	0.0354241	0.518634	normal	0.465095	-0.261127	normal	0.00230345	-3.03719	down
Panicum_miliaceum_newGene_1194	0.17174	-0.572765	normal	0.00403487	-1.05935	down	0.00118914	-1.30288	down	0.556453	-0.218932	normal	0.700795	0.224146	normal
Panicum_miliaceum_newGene_11951	0.0146951	-1.30005	normal	0.00470884	-2.1882	down	0.252306	-0.759934	normal	0.00281689	-2.01101	down	0.597487	-0.500229	normal
Panicum_miliaceum_newGene_11953	0.0991054	-1.30759	normal	0.0188757	-1.57985	normal	0.57505	-0.48341	normal	0.00215192	-1.86888	down	0.704828	-0.305511	normal
Panicum_miliaceum_newGene_11959	0.00551353	-1.49639	down	0.00480898	-2.02442	down	0.0370634	-1.49692	normal	0.000859331	-1.85789	down	0.260777	-0.781255	normal
Panicum_miliaceum_newGene_11993	0.000177662	-0.608858	down	1.77694e-05	-0.650423	down	0.000739142	-0.672652	down	6.8109e-07	-1.3236	down	0.451435	-0.288444	normal
Panicum_miliaceum_newGene_11998	0.0553237	-0.484947	normal	2.32344e-10	-1.2677	down	0.00476071	-0.665151	down	0.0964367	-0.360157	normal	0.0837045	0.529724	normal
Panicum_miliaceum_newGene_120	5.20001e-06	-1.36898	down	1.19666e-10	-2.35698	down	1.19952e-07	-2.11166	down	9.46567e-11	-2.1457	down	0.982944	-0.0116765	normal
Panicum_miliaceum_newGene_1202	0.81063	-0.158228	normal	0.169588	-0.647368	normal	0.374207	-0.482643	normal	0.0029556	-1.36217	down	0.799968	-0.151793	normal
Panicum_miliaceum_newGene_12039	0.00372225	-1.89183	down	7.02001e-05	-3.42746	down	0.00100779	-2.42106	down	2.76316e-07	-3.85472	down	0.971076	0.0374851	normal
Panicum_miliaceum_newGene_12041	0.2009	-0.833122	normal	0.073439	-1.4402	normal	1.94839e-05	-3.09302	down	5.23398e-06	-3.96366	down	0.147433	-1.20014	normal
Panicum_miliaceum_newGene_12054	0.122116	-0.805158	normal	0.0574652	-1.8586	normal	0.000357275	-3.13722	down	0.000366495	-2.31297	down	0.30988	-0.924945	normal
Panicum_miliaceum_newGene_12056	0.958196	0.0370358	normal	0.211599	0.395167	normal	0.00546562	0.884459	up	0.80441	0.115193	normal	1.72763e-15	-2.93643	down
Panicum_miliaceum_newGene_12091	0.694516	0.130892	normal	0.709642	0.0941974	normal	0.55067	0.126034	normal	0.0068651	-0.617112	down	0.795962	0.0862123	normal
Panicum_miliaceum_newGene_12112	0.00160172	-3.58425	down	1.52066e-06	-6.93185	down	9.39915e-05	-5.0106	down	3.98848e-07	-7.22193	down	0.336315	-1.83719	normal
Panicum_miliaceum_newGene_12115	0.0126407	-0.575274	normal	0.000422808	-1.04349	down	1.63624e-06	-1.44602	down	5.21963e-06	-1.27846	down	0.196316	0.437414	normal
Panicum_miliaceum_newGene_12128	0.000308022	-1.35184	down	0.0705476	-1.01274	normal	0.000141123	-1.88604	down	0.000563611	-1.76958	down	0.343815	-0.971253	normal
Panicum_miliaceum_newGene_12129	0.00386925	-0.708875	down	0.00168302	-0.824434	down	0.672433	-0.135945	normal	0.37054	-0.283557	normal	0.315713	0.324376	normal
Panicum_miliaceum_newGene_12132	0.0207503	-0.875061	normal	2.21996e-14	-2.07542	down	3.49733e-08	-1.66134	down	2.32866e-18	-2.32246	down	0.49098	-0.418114	normal
Panicum_miliaceum_newGene_12138	0.000160733	-2.36626	down	0.000213208	-2.77162	down	0.00081708	-2.28174	down	1.64719e-07	-7.38597	down	0.855454	-0.602106	normal
Panicum_miliaceum_newGene_12145	0.00449436	-0.597897	down	6.6627e-08	-1.02994	down	1.28658e-08	-1.03488	down	2.68281e-05	-0.946407	down	0.833031	0.0718335	normal
Panicum_miliaceum_newGene_12153	2.09891e-09	1.2513	up	1.71763e-18	1.92042	up	7.29126e-15	1.71658	up	2.25676e-16	2.21397	up	1.70059e-05	-1.15544	down
Panicum_miliaceum_newGene_12161	0.146109	-0.297209	normal	0.102052	-0.338835	normal	1.34625e-10	-1.25584	down	0.0340747	-0.748292	normal	0.81306	0.0811465	normal
Panicum_miliaceum_newGene_12162	2.7714e-07	-1.40789	down	7.23988e-19	-2.54331	down	1.26138e-12	-1.70758	down	0.000510837	-0.834298	down	0.00767452	-0.775621	down
Panicum_miliaceum_newGene_12190	0.000733544	-0.819084	down	0.274455	-0.31395	normal	0.593508	-0.203846	normal	0.959382	0.0210564	normal	0.015452	-0.704212	normal
Panicum_miliaceum_newGene_12206	0.29625	-0.34564	normal	0.279647	-0.274233	normal	0.00428414	-0.716365	down	0.129524	-0.372999	normal	0.00859514	-0.791919	down
Panicum_miliaceum_newGene_12255	0.0448994	-0.839142	normal	0.00153798	-1.40271	down	0.304732	-0.450317	normal	0.20464	-0.507709	normal	0.934624	-0.0630145	normal
Panicum_miliaceum_newGene_12266	0.76516	0.107017	normal	0.636912	0.191877	normal	0.3503	-0.319758	normal	0.465675	0.26507	normal	0.00266511	-1.19205	down
Panicum_miliaceum_newGene_1227	1.2412e-05	-1.49691	down	8.55213e-09	-2.26693	down	4.43646e-09	-2.80858	down	5.22094e-10	-2.24671	down	0.00250288	-1.50818	down
Panicum_miliaceum_newGene_12281	0.00488854	-1.22992	down	0.00585155	-1.39017	down	2.88162e-05	-2.38253	down	0.239158	-0.662116	normal	0.581562	-0.454006	normal
Panicum_miliaceum_newGene_12286	0.356139	-0.49585	normal	0.109133	-0.803898	normal	0.0544123	-1.24761	normal	0.00645796	-1.41348	down	0.322674	-0.710329	normal
Panicum_miliaceum_newGene_12315	0.059219	-1.11129	normal	0.0257574	-1.357	normal	0.000430618	-2.43251	down	0.000895525	-2.07779	down	0.540802	-1.34863	normal
Panicum_miliaceum_newGene_12348	0.000133619	-0.663347	down	0.0744814	-0.347752	normal	0.0525039	-0.447131	normal	0.000146638	-0.718747	down	3.60194e-10	1.93254	up
Panicum_miliaceum_newGene_12357	0.144688	-0.771547	normal	0.00745053	-1.54402	down	0.0182605	-1.32662	normal	0.0213172	-1.22006	normal	0.000772646	-2.18905	down
Panicum_miliaceum_newGene_12364	0.929768	0.0359821	normal	0.996428	0.00154232	normal	0.24132	-0.345723	normal	2.94369e-05	-1.15266	down	0.153847	-0.500981	normal
Panicum_miliaceum_newGene_12368	0.227783	-0.916653	normal	0.0467712	-2.04235	normal	0.00235153	-1.52818	down	0.0578653	-1.09407	normal	0.644632	-0.549588	normal
Panicum_miliaceum_newGene_12377	0.00372377	-0.721479	down	2.10908e-07	-1.12753	down	0.00118798	-0.933203	down	5.31048e-11	-1.50463	down	0.899678	0.0546342	normal
Panicum_miliaceum_newGene_12380	0.555365	-0.190787	normal	0.00224552	-0.860627	down	0.0336791	-0.597449	normal	0.0502294	-0.518072	normal	0.456814	-0.415154	normal
Panicum_miliaceum_newGene_12381	0.199254	-0.51935	normal	0.00114629	-1.37475	down	6.46026e-05	-1.65133	down	5.01429e-05	-1.7983	down	0.776409	-0.18206	normal
Panicum_miliaceum_newGene_12399	6.37276e-05	-1.8676	down	0.044408	-2.007	normal	7.94208e-07	-5.83045	down	4.54199e-08	-5.17017	down	0.794571	-0.477719	normal
Panicum_miliaceum_newGene_12402	0.720599	0.199359	normal	0.0946266	-0.848083	normal	0.189657	-0.480561	normal	0.000968526	-1.56963	down	0.46249	0.538667	normal
Panicum_miliaceum_newGene_12406	0.0870059	0.856056	normal	0.0301748	1.10803	normal	7.35645e-06	1.68149	up	2.25973e-06	1.80759	up	0.000214554	-3.64952	down
Panicum_miliaceum_newGene_1242	0.00447496	-0.792469	down	6.7162e-06	-1.08089	down	0.0235045	-0.500352	normal	0.0306833	-0.589313	normal	0.963968	0.0178241	normal
Panicum_miliaceum_newGene_1244	0.000120076	-1.74199	down	0.0742366	-1.44164	normal	0.0399006	-0.89248	normal	0.0829693	-0.788992	normal	0.724631	0.245232	normal
Panicum_miliaceum_newGene_12444	0.00483746	-0.703709	down	0.0223289	-0.829581	normal	0.000196569	-0.937346	down	0.0645722	-0.702382	normal	0.847649	0.0653825	normal
Panicum_miliaceum_newGene_12453	0.300117	-0.221567	normal	0.0926172	-0.370571	normal	1.32138e-06	-0.754027	down	0.0352301	-0.501346	normal	0.260241	-0.408712	normal
Panicum_miliaceum_newGene_12465	0.464122	-0.225163	normal	0.0850319	-0.461385	normal	0.0231428	-0.553674	normal	0.000867006	-0.873827	down	0.00037337	-1.60356	down
Panicum_miliaceum_newGene_12472	0.0247794	-1.83305	normal	0.0179313	-1.30011	normal	0.0130478	-2.16671	normal	7.91142e-07	-4.31322	down	0.00164605	-2.13382	down
Panicum_miliaceum_newGene_12477	0.0196647	-0.60231	normal	0.00347971	-0.676022	down	0.0154836	-0.676849	normal	0.00152467	-0.792768	down	0.198211	-0.3968	normal
Panicum_miliaceum_newGene_12560	6.82206e-05	-1.50212	down	0.0351528	-3.49918	normal	1.99406e-06	-1.72732	down	0.300526	-0.529145	normal	0.279403	-0.659519	normal
Panicum_miliaceum_newGene_12561	0.0197344	-0.99303	normal	0.0721685	-0.997188	normal	0.103446	-0.769064	normal	0.00243786	-1.25534	down	0.0444195	-1.23278	normal
Panicum_miliaceum_newGene_12581	0.608684	0.146602	normal	0.209734	0.28852	normal	0.116249	0.502886	normal	0.903912	0.0487006	normal	0.000660407	-0.848739	down
Panicum_miliaceum_newGene_12608	0.00287039	-1.79568	down	0.00234068	-1.67475	down	3.51684e-06	-3.75527	down	0.00107818	-2.40065	down	0.0100644	-1.78123	normal
Panicum_miliaceum_newGene_12615	0.00119746	-0.805802	down	0.000280588	-1.27556	down	1.30623e-06	-1.17803	down	3.86028e-12	-2.6045	down	0.140278	-0.880043	normal
Panicum_miliaceum_newGene_12638	0.000943657	-1.54369	down	7.00545e-06	-2.13172	down	0.0319284	-1.70446	normal	6.63481e-08	-3.08115	down	0.053454	-1.36234	normal
Panicum_miliaceum_newGene_12648	0.0898058	-0.733133	normal	0.0301664	-1.00805	normal	0.000345678	-1.6491	down	8.9437e-06	-2.15044	down	0.189582	0.884078	normal
Panicum_miliaceum_newGene_1265	0.000332223	-0.972294	down	3.25969e-07	-1.43464	down	0.00125593	-1.71793	down	1.14213e-17	-2.51194	down	0.622879	-0.281256	normal
Panicum_miliaceum_newGene_12656	2.83706e-06	-1.40948	down	3.70547e-06	-1.84373	down	1.38691e-07	-1.68648	down	1.00979e-08	-1.62464	down	0.379998	0.428497	normal
Panicum_miliaceum_newGene_12663	0.6211	-0.129547	normal	0.0455964	-0.809537	normal	0.0448611	-0.784638	normal	9.34526e-08	-1.23707	down	0.0110961	-1.16568	normal
Panicum_miliaceum_newGene_12686	0.212261	-0.851649	normal	0.015355	-1.60332	normal	0.00858275	-2.28099	down	0.0127209	-1.67708	normal	0.000453961	1.4954	up
Panicum_miliaceum_newGene_12688	0.00238495	-0.749486	down	0.156665	-0.50492	normal	0.241724	-0.304691	normal	0.0928488	-0.472167	normal	0.65974	0.196761	normal
Panicum_miliaceum_newGene_12748	0.927957	0.0327629	normal	0.993479	0.0026582	normal	0.76301	-0.116704	normal	7.56809e-06	-1.63046	down	2.17946e-08	-2.67933	down
Panicum_miliaceum_newGene_12757	8.85465e-08	-2.61388	down	9.12806e-05	-3.52265	down	1.29687e-07	-4.44683	down	1.63864e-10	-8.54843	down	1.7995e-09	-8.60221	down
Panicum_miliaceum_newGene_12759	0.00220306	-0.601085	down	0.00420805	-0.705116	down	2.14875e-06	-0.956373	down	3.68246e-05	-0.917574	down	0.525056	-0.212484	normal
Panicum_miliaceum_newGene_12787	0.479682	-0.184425	normal	2.13787e-05	-0.785127	down	0.0883652	-0.338988	normal	0.696717	-0.11549	normal	0.671231	0.20015	normal
Panicum_miliaceum_newGene_12788	0.174922	-2.38244	normal	2.4305e-09	-5.69338	down	0.678577	-0.80562	normal	0.385058	-2.47661	normal	0.0226754	-1.80237	normal
Panicum_miliaceum_newGene_1279	0.524208	-0.312133	normal	0.0880139	-0.690129	normal	0.360945	-0.43665	normal	2.97098e-06	-1.69683	down	0.947415	-0.0575621	normal
Panicum_miliaceum_newGene_12794	0.180058	-0.543623	normal	0.000996153	-1.63858	down	3.004e-06	-2.15998	down	0.000148933	-1.98213	down	0.357536	-0.460515	normal
Panicum_miliaceum_newGene_12805	0.114583	-0.365213	normal	0.444628	-0.203989	normal	0.339801	-0.253359	normal	0.96899	0.0106893	normal	0.000772518	-0.93887	down
Panicum_miliaceum_newGene_12821	0.19511	-0.506131	normal	5.32768e-07	-1.72257	down	8.90364e-05	-1.56378	down	0.00236173	-1.19778	down	0.440129	-0.37892	normal
Panicum_miliaceum_newGene_12841	6.43551e-13	-1.85213	down	1.32828e-21	-2.34119	down	1.59098e-19	-2.66769	down	7.26783e-19	-3.41414	down	0.147974	-0.706761	normal
Panicum_miliaceum_newGene_12857	0.000119528	-0.95492	down	8.0222e-12	-1.76795	down	6.43436e-10	-1.49108	down	3.46268e-06	-1.09452	down	0.486283	0.297398	normal
Panicum_miliaceum_newGene_12858	0.000509096	-0.962806	down	4.25029e-05	-1.26897	down	0.00527259	-0.959545	down	0.00450524	-0.837105	down	0.0794309	-0.970866	normal
Panicum_miliaceum_newGene_12868	1.59032e-05	-0.95634	down	0.000328028	-0.924191	down	0.0439686	-0.489412	normal	0.99649	0.00180761	normal	0.508349	0.293249	normal
Panicum_miliaceum_newGene_12872	0.987704	-0.00421661	normal	0.0124767	-0.406013	normal	0.000305191	-0.591029	down	0.00130403	-0.525412	normal	0.720017	-0.0775187	normal
Panicum_miliaceum_newGene_12877	5.5333e-26	-1.42184	down	8.58225e-70	-2.61326	down	1.09115e-36	-3.88772	down	6.03745e-27	-5.46354	down	0.011626	-1.07762	normal
Panicum_miliaceum_newGene_12878	3.29023e-16	-2.03088	down	3.38353e-35	-2.11892	down	5.01386e-25	-2.42194	down	2.35331e-15	-4.71442	down	0.245092	-2.86863	normal
Panicum_miliaceum_newGene_12887	3.33592e-05	-1.4275	down	0.0448584	-0.935201	normal	0.889838	0.0599998	normal	0.225244	0.462251	normal	0.658319	-0.382766	normal
Panicum_miliaceum_newGene_12892	0.408341	-0.434885	normal	0.0114314	-1.48365	normal	0.0303531	-1.51828	normal	0.00197244	-1.59596	down	0.934658	0.0599958	normal
Panicum_miliaceum_newGene_12893	0.102005	-0.717293	normal	0.00346522	-1.13251	down	8.77603e-07	-1.62441	down	0.0108038	-1.05457	normal	0.361522	-0.534938	normal
Panicum_miliaceum_newGene_12895	0.0150939	-0.946742	normal	1.50347e-11	-2.3155	down	3.65146e-08	-1.76989	down	0.00316691	-1.1096	down	0.0460955	0.579028	normal
Panicum_miliaceum_newGene_12896	0.0703801	-0.349598	normal	3.89505e-07	-0.904714	down	4.07837e-05	-0.782578	down	0.000119436	-0.903465	down	0.715448	0.144226	normal
Panicum_miliaceum_newGene_12930	0.866935	0.136952	normal	0.564879	-0.27837	normal	0.877235	0.0860199	normal	0.184377	-0.607566	normal	0.00317771	-1.7531	down
Panicum_miliaceum_newGene_12933	0.0467615	-0.609932	normal	0.000503107	-1.27901	down	5.30549e-06	-1.44371	down	0.0210361	-1.04122	normal	0.123783	-0.659849	normal
Panicum_miliaceum_newGene_12948	0.11444	-0.335911	normal	0.000466134	-0.752687	down	0.00657662	-0.491659	normal	0.13235	-0.328522	normal	0.0854007	0.427087	normal
Panicum_miliaceum_newGene_12950	0.116812	-0.953579	normal	0.524247	-0.332589	normal	0.00746816	-1.33986	down	0.000637133	-1.69689	down	0.283966	0.720699	normal
Panicum_miliaceum_newGene_12951	0.000139504	-1.51106	down	0.00189086	-2.19787	down	4.13083e-08	-3.25451	down	0.000306477	-1.79241	down	8.93266e-07	-2.54261	down
Panicum_miliaceum_newGene_12953	2.35973e-05	-1.11182	down	0.000169972	-0.924028	down	0.00131256	-1.02725	down	6.2871e-07	-1.38359	down	0.232487	-0.925452	normal
Panicum_miliaceum_newGene_12972	0.871352	-0.0766312	normal	0.115676	-0.500105	normal	0.00660764	-0.851247	down	0.183668	-0.61359	normal	0.722571	0.162504	normal
Panicum_miliaceum_newGene_13017	0.429092	0.385921	normal	0.0183116	1.13264	normal	0.0368508	0.866034	normal	0.0832643	0.742236	normal	0.00835004	-1.82848	down
Panicum_miliaceum_newGene_13021	0.00143769	-1.63043	down	0.215768	-0.935617	normal	0.195397	-1.17737	normal	2.32654e-07	-4.01014	down	0.108239	-1.72381	normal
Panicum_miliaceum_newGene_13023	1.75974e-06	-3.11254	down	0.00113898	-1.97549	down	6.41182e-05	-2.44584	down	0.000102726	-2.45845	down	0.440388	-1.04346	normal
Panicum_miliaceum_newGene_13072	0.314664	-1.12255	normal	0.580273	-1.1938	normal	0.750529	0.289153	normal	0.000107937	-2.9643	down	0.791094	0.391984	normal
Panicum_miliaceum_newGene_13075	0.460098	-0.267799	normal	0.00166474	-1.07102	down	0.609002	-0.199931	normal	0.361507	0.358038	normal	0.618759	0.244767	normal
Panicum_miliaceum_newGene_13106	0.303329	-0.214085	normal	0.0338852	-0.424942	normal	0.00819251	-0.728721	down	0.0247639	-0.601004	normal	0.0823249	0.358079	normal
Panicum_miliaceum_newGene_13111	0.073516	-0.383469	normal	0.0515814	-0.613983	normal	0.00105763	-0.685983	down	0.756532	0.0840322	normal	0.844919	-0.0778474	normal
Panicum_miliaceum_newGene_13112	0.0106953	-0.734189	normal	0.013177	-1.38498	normal	7.5322e-07	-1.78231	down	6.695e-11	-2.38687	down	0.533355	-0.5583	normal
Panicum_miliaceum_newGene_13156	0.501037	0.311225	normal	0.000332773	1.1568	up	8.37996e-06	1.7344	up	0.0345715	0.953125	normal	0.00500924	-1.3294	down
Panicum_miliaceum_newGene_13169	0.50225	-0.270846	normal	0.00409828	-1.02459	down	0.0815742	-0.585489	normal	3.18343e-08	-2.14766	down	0.992259	0.00788555	normal
Panicum_miliaceum_newGene_13215	0.206392	-0.500089	normal	0.2133	-0.771672	normal	0.00926413	-0.9592	down	0.00697485	-1.01831	down	0.18709	0.671007	normal
Panicum_miliaceum_newGene_13216	0.48277	0.33614	normal	0.799678	-0.147736	normal	0.915778	-0.049481	normal	0.00233452	-1.2194	down	0.591891	0.40659	normal
Panicum_miliaceum_newGene_13274	0.242591	-0.73072	normal	0.0239192	-1.28667	normal	0.426509	-0.509542	normal	0.00164448	-2.08296	down	0.840061	0.14924	normal
Panicum_miliaceum_newGene_13295	0.310364	-0.523693	normal	0.419888	-0.425893	normal	0.931575	-0.062546	normal	0.00176724	-1.59495	down	0.000860977	1.73455	up
Panicum_miliaceum_newGene_13333	0.780211	-0.0778432	normal	0.183147	-0.339895	normal	0.732694	-0.113125	normal	0.00017305	-0.617819	down	0.452348	-0.297121	normal
Panicum_miliaceum_newGene_13337	0.0234441	-0.961449	normal	0.187457	-0.728419	normal	0.00645128	-1.16767	down	0.001736	-1.29025	down	0.483119	0.503553	normal
Panicum_miliaceum_newGene_13341	0.448889	-0.534233	normal	0.000511135	-2.35966	down	0.000838409	-2.71312	down	0.013793	-1.49216	normal	0.386581	0.528425	normal
Panicum_miliaceum_newGene_13364	0.603392	-0.182831	normal	0.376463	-0.316715	normal	0.0600824	-0.687311	normal	1.83964e-06	-1.6606	down	0.480801	0.290485	normal
Panicum_miliaceum_newGene_13384	0.0938502	-1.77464	normal	0.154281	-2.66689	normal	0.00194569	-2.84733	down	0.2028	-1.17236	normal	0.810367	-0.415349	normal
Panicum_miliaceum_newGene_13393	0.00715121	-0.934506	down	0.0152145	-0.888801	normal	7.24114e-05	-1.29384	down	0.305617	-0.436656	normal	0.505974	-0.310766	normal
Panicum_miliaceum_newGene_13394	0.00210703	-1.01263	down	0.0410613	-0.776881	normal	0.107795	-0.622908	normal	0.402457	-0.338336	normal	0.381512	-0.356011	normal
Panicum_miliaceum_newGene_13411	0.421007	-0.316848	normal	0.0181697	-0.832683	normal	0.0091781	-0.801471	down	0.674264	-0.151654	normal	0.775112	-0.12887	normal
Panicum_miliaceum_newGene_13418	0.171888	-0.500918	normal	0.0901248	-0.684898	normal	0.00465125	-1.0784	down	0.093462	-0.634868	normal	0.575726	0.303306	normal
Panicum_miliaceum_newGene_13420	0.374099	-0.202157	normal	0.0073876	-0.480563	normal	0.000145316	-0.718773	down	0.292301	-0.282028	normal	0.0657241	0.470503	normal
Panicum_miliaceum_newGene_13429	0.539081	0.144093	normal	5.92474e-05	-0.862389	down	0.137412	-0.62853	normal	2.41347e-06	-1.19006	down	0.295744	0.335063	normal
Panicum_miliaceum_newGene_13432	5.07604e-05	-1.42471	down	5.54727e-05	-1.3019	down	3.10556e-10	-2.23734	down	2.36449e-15	-3.06477	down	0.0259969	-0.816384	normal
Panicum_miliaceum_newGene_1344	0.494205	0.215635	normal	0.0934954	-0.555073	normal	0.159258	-0.559815	normal	0.000261835	-1.20914	down	0.382508	0.487979	normal
Panicum_miliaceum_newGene_13441	0.00545186	-0.542395	normal	0.0529177	-0.426057	normal	0.000232304	-0.750167	down	2.92599e-05	-1.03616	down	0.0158865	-0.799875	normal
Panicum_miliaceum_newGene_1345	0.0367346	-0.345193	normal	0.00327666	-0.683581	down	0.000604775	-0.561368	normal	0.341743	-0.195648	normal	0.591679	-0.11012	normal
Panicum_miliaceum_newGene_13453	0.0918043	0.723551	normal	0.331273	-0.781802	normal	0.725418	-0.183893	normal	0.12132	-0.723988	normal	0.000246827	-2.09675	down
Panicum_miliaceum_newGene_1347	0.191645	-0.863288	normal	0.0167198	-1.19288	normal	2.41863e-06	-2.20746	down	0.270442	-0.679227	normal	0.241752	0.542711	normal
Panicum_miliaceum_newGene_13480	3.39345e-07	-0.848251	down	3.73283e-09	-1.11281	down	1.76049e-20	-1.67645	down	8.80963e-12	-1.51818	down	0.0250997	-0.701989	normal
Panicum_miliaceum_newGene_13483	0.00613567	-0.46625	normal	1.24619e-05	-0.788645	down	0.00806599	-0.711325	down	0.000161971	-0.834944	down	0.628018	0.187624	normal
Panicum_miliaceum_newGene_13487	0.224947	-0.634989	normal	0.000904952	-0.87707	down	8.60001e-05	-0.981709	down	0.000839684	-1.38085	down	0.846741	0.190975	normal
Panicum_miliaceum_newGene_1349	0.798515	0.0678488	normal	0.494361	-0.166075	normal	0.202311	-0.278554	normal	0.000369892	-0.690735	down	0.99116	-0.00762871	normal
Panicum_miliaceum_newGene_13500	0.0290745	-0.738634	normal	7.74951e-07	-1.2827	down	3.0795e-05	-1.37488	down	0.0140207	-0.67763	normal	0.408452	0.282739	normal
Panicum_miliaceum_newGene_13514	0.469533	-0.216098	normal	0.0165224	-0.707693	normal	0.000505446	-1.28855	down	0.00740372	-0.808131	down	0.669996	0.198075	normal
Panicum_miliaceum_newGene_13577	0.0498193	-0.764704	normal	0.116009	-0.623911	normal	0.113525	-0.655033	normal	0.00643867	-0.999429	down	0.34156	0.451383	normal
Panicum_miliaceum_newGene_13592	0.00623115	-0.673211	down	0.0623789	-0.524218	normal	0.314676	-0.250574	normal	0.945979	-0.0232746	normal	0.66755	-0.166399	normal
Panicum_miliaceum_newGene_13598	0.0430746	-0.989705	normal	0.00927131	-2.34771	down	0.0201256	-1.16016	normal	0.0328197	-1.44203	normal	0.522544	-0.442575	normal
Panicum_miliaceum_newGene_13612	0.0415024	-0.52746	normal	0.0223738	-0.64863	normal	0.00990259	-0.612915	down	0.0467637	-0.533313	normal	0.788866	0.107907	normal
Panicum_miliaceum_newGene_13656	0.000406824	-0.677395	down	0.200495	-0.294387	normal	0.777485	-0.0638294	normal	0.747248	0.112958	normal	0.740125	-0.105099	normal
Panicum_miliaceum_newGene_13663	1.94903e-05	-1.3189	down	3.3402e-21	-2.8896	down	5.04937e-24	-3.44048	down	1.92102e-22	-3.34608	down	0.244992	-1.55614	normal
Panicum_miliaceum_newGene_13669	0.120697	-0.731619	normal	0.00545777	-1.02942	down	0.274169	-0.548962	normal	0.00206816	-1.33749	down	0.592813	0.305304	normal
Panicum_miliaceum_newGene_13706	0.993053	0.00293463	normal	0.001132	-0.580845	normal	0.00450979	-0.663055	down	6.39798e-12	-1.2621	down	0.298018	0.307486	normal
Panicum_miliaceum_newGene_13724	0.000239355	-1.15275	down	0.000873106	-1.17234	down	0.207353	-0.430001	normal	0.0104419	-0.751033	normal	0.920839	-0.046752	normal
Panicum_miliaceum_newGene_13738	0.0511056	-0.938767	normal	0.045133	-1.02115	normal	0.00943111	-1.38683	down	0.365026	-0.398647	normal	0.534001	-0.472605	normal
Panicum_miliaceum_newGene_13748	0.328382	-0.302604	normal	7.74202e-06	-1.23544	down	0.0157016	-0.626268	normal	0.175203	-0.412445	normal	0.277554	0.4083	normal
Panicum_miliaceum_newGene_13749	0.190315	-0.356181	normal	0.0147029	-0.698683	normal	1.94032e-06	-1.06779	down	0.000252372	-0.822586	down	0.548368	-0.257365	normal
Panicum_miliaceum_newGene_13763	0.00911453	-0.441476	normal	0.000789417	-0.637716	down	0.868082	0.0376303	normal	0.680179	-0.122665	normal	0.875292	-0.0499357	normal
Panicum_miliaceum_newGene_13814	0.0600976	-1.14136	normal	0.00520709	-1.49085	down	0.0144349	-1.30594	normal	0.511866	-0.35384	normal	0.910387	0.0918887	normal
Panicum_miliaceum_newGene_13817	0.121301	-0.940725	normal	0.0226963	-1.43891	normal	0.00624978	-1.70405	down	0.303585	-0.895801	normal	0.92108	0.0960021	normal
Panicum_miliaceum_newGene_13826	0.531635	-0.392141	normal	0.00192921	-1.39291	down	0.0576572	-0.902751	normal	0.12279	-0.723495	normal	0.708526	0.227138	normal
Panicum_miliaceum_newGene_13827	0.0143817	-0.556063	normal	0.000346311	-0.790962	down	0.00777803	-0.58868	down	0.000266762	-0.829079	down	0.856966	0.0660024	normal
Panicum_miliaceum_newGene_1383	0.0156666	-0.643439	normal	0.000250393	-0.824739	down	0.0173398	-0.539383	normal	0.0704804	-0.436852	normal	0.423314	0.23346	normal
Panicum_miliaceum_newGene_13849	0.142842	-0.613004	normal	0.00626605	-1.40634	down	0.132017	-0.747207	normal	0.0135068	-1.03812	normal	0.978858	0.0192512	normal
Panicum_miliaceum_newGene_13855	0.282398	-0.509952	normal	0.319505	-0.561091	normal	0.0848092	-1.03343	normal	0.515052	-0.290211	normal	0.00238098	-1.65232	down
Panicum_miliaceum_newGene_13882	0.0195827	-0.753898	normal	0.000229352	-1.24545	down	0.015535	-0.831414	normal	0.0056694	-0.760628	down	0.326904	-0.336871	normal
Panicum_miliaceum_newGene_13890	0.000419349	-1.4314	down	0.0457456	-0.860869	normal	0.00346555	-1.22195	down	0.0286713	-0.836508	normal	0.628617	-0.247996	normal
Panicum_miliaceum_newGene_13891	0.108938	-0.515752	normal	0.00205345	-0.888149	down	0.0011549	-1.01491	down	0.00259525	-0.909261	down	0.301177	-0.441076	normal
Panicum_miliaceum_newGene_13915	0.148203	-0.364761	normal	0.0398459	-0.53542	normal	0.000169251	-0.990146	down	1.31485e-06	-1.21348	down	0.888095	0.0545777	normal
Panicum_miliaceum_newGene_13917	0.86921	-0.117966	normal	0.177789	-1.03172	normal	0.0275903	-1.26093	normal	0.000492688	-2.0957	down	0.243353	-0.971851	normal
Panicum_miliaceum_newGene_13927	0.540076	-0.207267	normal	0.0551649	-0.494771	normal	0.0423132	-0.538517	normal	0.000946666	-0.991496	down	0.00769854	1.14275	up
Panicum_miliaceum_newGene_13950	0.000173536	-1.11773	down	0.000125708	-1.24798	down	0.00937593	-0.983667	down	0.0358402	-0.865068	normal	0.695255	-0.271993	normal
Panicum_miliaceum_newGene_1396	0.567198	-0.213267	normal	5.27091e-07	-1.36614	down	0.0002145	-1.0113	down	6.23951e-05	-1.25403	down	0.338645	-0.374783	normal
Panicum_miliaceum_newGene_13967	0.00289694	-0.848647	down	0.0006131	-0.980091	down	0.0440245	-0.592112	normal	0.067116	-0.548559	normal	0.770605	0.125203	normal
Panicum_miliaceum_newGene_13996	0.0476548	-0.573081	normal	4.72258e-06	-1.3915	down	0.0113997	-1.37537	normal	4.71665e-05	-1.62261	down	0.69399	-0.152956	normal
Panicum_miliaceum_newGene_13999	0.409546	-0.33539	normal	0.243393	-0.513126	normal	0.0600127	-0.783651	normal	0.000977715	-1.35868	down	0.508074	-0.391262	normal
Panicum_miliaceum_newGene_1400	0.781792	-0.283729	normal	0.114685	-1.32302	normal	0.00573832	-1.78259	down	0.676047	0.339594	normal	0.249748	-1.37655	normal
Panicum_miliaceum_newGene_1401	0.243	-0.265356	normal	0.329693	-0.248504	normal	0.0753855	-0.478201	normal	0.000228695	-0.904966	down	0.407005	-0.459024	normal
Panicum_miliaceum_newGene_14020	0.20083	-0.338549	normal	0.140529	-0.512239	normal	0.000276358	-0.705914	down	0.0889757	-0.435836	normal	0.757587	-0.161326	normal
Panicum_miliaceum_newGene_14041	0.00505205	-0.625842	down	8.50634e-05	-0.758	down	0.000756416	-0.636915	down	0.0190117	-0.544532	normal	0.294416	-0.355174	normal
Panicum_miliaceum_newGene_14047	0.0219	-0.764948	normal	0.00174647	-1.19816	down	0.00605935	-1.32356	down	0.00244599	-1.07851	down	0.23282	-0.620028	normal
Panicum_miliaceum_newGene_14060	0.133283	-1.33559	normal	5.52165e-05	-3.35702	down	1.32048e-05	-2.60375	down	5.18508e-08	-5.4889	down	0.06996	-2.94177	normal
Panicum_miliaceum_newGene_14129	4.61055e-17	-1.63243	down	2.42772e-31	-2.81008	down	4.51236e-28	-3.07608	down	4.52395e-26	-2.83849	down	0.244096	-0.288926	normal
Panicum_miliaceum_newGene_14136	0.632009	-0.185155	normal	0.000365709	-0.766951	down	0.311727	-0.317579	normal	0.00330079	-0.942593	down	0.749667	-0.163897	normal
Panicum_miliaceum_newGene_14154	0.845808	0.0521634	normal	0.0228793	0.560096	normal	1.32125e-11	1.28998	up	0.0032445	0.961729	up	0.00463992	-0.755943	down
Panicum_miliaceum_newGene_14155	0.378707	0.295909	normal	0.224179	0.36527	normal	4.55971e-07	1.32347	up	0.0725978	0.608449	normal	0.000407444	-1.00001	down
Panicum_miliaceum_newGene_14162	0.213891	-0.899431	normal	0.063388	-1.67375	normal	0.0702991	-1.26999	normal	0.00117052	-2.04707	down	0.864206	-0.11682	normal
Panicum_miliaceum_newGene_14165	0.063146	-0.623981	normal	0.000275678	-1.4598	down	0.00868678	-0.967005	down	0.0144026	-0.796149	normal	0.999799	0.000162697	normal
Panicum_miliaceum_newGene_14168	0.198089	0.392055	normal	0.192216	0.33581	normal	0.165033	0.478739	normal	0.61193	-0.158055	normal	3.53197e-05	-1.22559	down
Panicum_miliaceum_newGene_14172	0.466372	0.164537	normal	0.00585444	-0.841551	down	0.000276569	-0.958597	down	7.79527e-06	-1.14174	down	0.11448	0.622098	normal
Panicum_miliaceum_newGene_14174	0.0228964	-0.92956	normal	0.00274295	-1.20577	down	0.000640436	-1.67889	down	2.17191e-09	-2.36665	down	0.190678	-1.6242	normal
Panicum_miliaceum_newGene_14179	0.822001	-0.0717952	normal	0.24786	-0.363992	normal	0.62241	-0.129529	normal	0.000809278	-0.971961	down	0.585574	-0.339333	normal
Panicum_miliaceum_newGene_14185	0.0880836	-0.526849	normal	0.024245	-0.786978	normal	0.173032	-0.510934	normal	0.000737397	-1.10541	down	0.811573	-0.189396	normal
Panicum_miliaceum_newGene_14212	0.0657226	-1.22219	normal	0.000570675	-2.07753	down	0.0617833	-0.98722	normal	0.030137	-1.10962	normal	0.872116	0.128184	normal
Panicum_miliaceum_newGene_14217	0.0191358	-0.618282	normal	0.00659764	-0.770224	down	0.0388373	-0.587263	normal	1.07372e-05	-1.02614	down	0.00642554	-1.18195	down
Panicum_miliaceum_newGene_14225	0.211455	-0.38721	normal	0.00260248	-0.900691	down	0.0526096	-0.662587	normal	1.72268e-07	-1.47274	down	0.0424114	-0.662688	normal
Panicum_miliaceum_newGene_1424	0.102125	-0.392835	normal	0.0032135	-0.78141	down	0.197387	-0.271707	normal	0.69775	0.101992	normal	0.0201425	0.89751	normal
Panicum_miliaceum_newGene_14241	0.0554329	-0.819039	normal	0.0264029	-0.883475	normal	0.000164154	-1.50725	down	0.000653092	-1.36737	down	0.639797	-0.319647	normal
Panicum_miliaceum_newGene_14243	0.00258112	-1.01888	down	0.000944531	-1.07126	down	3.11924e-08	-1.32125	down	0.19348	-0.414953	normal	1.14564e-06	1.3908	up
Panicum_miliaceum_newGene_14247	0.241228	-0.343829	normal	0.0117031	-0.761589	normal	0.0309338	-0.588192	normal	0.000346915	-1.14802	down	0.233964	-0.639275	normal
Panicum_miliaceum_newGene_14254	0.209012	-0.676202	normal	0.0118063	-1.40497	normal	7.07146e-06	-1.99279	down	0.000107937	-2.02869	down	0.383013	-0.566032	normal
Panicum_miliaceum_newGene_14259	0.348148	-0.353607	normal	0.062471	-0.518155	normal	0.0310561	-0.613697	normal	1.35315e-07	-1.58874	down	0.88709	0.066176	normal
Panicum_miliaceum_newGene_1427	0.0483803	-1.1441	normal	2.10481e-05	-2.12393	down	0.000305444	-1.77414	down	9.25759e-05	-1.80131	down	0.545604	-0.339929	normal
Panicum_miliaceum_newGene_14271	0.255629	-0.618384	normal	0.0326489	-1.27231	normal	0.0562602	-0.895142	normal	0.00688658	-1.38873	down	0.281422	-0.772979	normal
Panicum_miliaceum_newGene_14289	0.449391	-0.374414	normal	0.131877	-0.660661	normal	0.017456	-0.985928	normal	6.21043e-05	-1.91827	down	0.0541708	-0.89763	normal
Panicum_miliaceum_newGene_14294	2.04017e-06	-0.937041	down	0.000544759	-1.11068	down	0.00586188	-0.691315	down	0.00128797	-0.750689	down	0.941335	-0.039631	normal
Panicum_miliaceum_newGene_14298	0.77824	-0.111621	normal	0.117129	-0.63684	normal	0.0272954	-0.786853	normal	0.000646786	-1.12158	down	0.110493	0.787816	normal
Panicum_miliaceum_newGene_143	3.10322e-05	-0.97896	down	0.0021245	-0.863184	down	1.86263e-05	-1.0543	down	2.06591e-06	-1.31809	down	0.00078961	0.923911	up
Panicum_miliaceum_newGene_14312	0.00494584	-1.19799	down	0.147472	-0.607913	normal	0.000879498	-1.32273	down	0.41489	-0.394898	normal	0.385874	-0.567949	normal
Panicum_miliaceum_newGene_14319	0.000537713	-1.13976	down	0.000267923	-1.6298	down	2.89721e-05	-1.44972	down	9.95919e-08	-2.15658	down	0.635773	0.253507	normal
Panicum_miliaceum_newGene_14322	0.0108431	-0.537764	normal	0.0049741	-0.656067	down	1.44325e-05	-1.04703	down	1.03388e-09	-1.62202	down	0.222771	0.585754	normal
Panicum_miliaceum_newGene_14346	0.000381286	-0.526494	normal	9.81805e-12	-1.08164	down	6.44349e-08	-1.01515	down	0.0912009	-0.486465	normal	0.000106711	-0.794416	down
Panicum_miliaceum_newGene_14353	0.0891631	-2.08953	normal	1.28039e-07	-4.88764	down	1.09851e-08	-7.67695	down	2.88562e-09	-8.03473	down	2.80395e-08	-8.08732	down
Panicum_miliaceum_newGene_1436	0.000789788	-0.828757	down	6.22544e-07	-1.32011	down	5.74499e-10	-1.5734	down	1.32663e-20	-2.18732	down	0.319642	0.379514	normal
Panicum_miliaceum_newGene_14387	0.00471819	-0.508538	normal	4.06858e-07	-1.25195	down	4.38971e-09	-1.18655	down	7.05627e-18	-1.77376	down	0.810629	-0.0918858	normal
Panicum_miliaceum_newGene_144	9.42474e-05	-1.47303	down	5.47797e-05	-1.80597	down	6.30057e-09	-2.57417	down	0.00337865	-1.03317	down	0.87486	-0.111816	normal
Panicum_miliaceum_newGene_14410	0.341505	-0.518397	normal	0.00473922	-1.76367	down	4.97081e-05	-2.80156	down	0.0234173	-1.56485	normal	0.887876	0.104795	normal
Panicum_miliaceum_newGene_14414	0.566969	0.239949	normal	0.000198159	-1.6005	down	0.267249	0.432864	normal	0.0198481	-1.02235	normal	0.825376	-0.177722	normal
Panicum_miliaceum_newGene_14418	1.57046e-05	-1.58779	down	1.7843e-05	-2.76537	down	3.9964e-08	-2.17857	down	8.04253e-08	-2.82362	down	0.426133	-0.540487	normal
Panicum_miliaceum_newGene_14421	0.0329091	-0.572799	normal	0.000114356	-0.992948	down	1.34754e-05	-0.887136	down	2.06443e-10	-1.59326	down	2.51536e-08	-1.26412	down
Panicum_miliaceum_newGene_14448	0.78888	-0.0795399	normal	0.0337502	-0.487007	normal	0.0011903	-0.804127	down	0.0295262	-0.771828	normal	0.65974	-0.263735	normal
Panicum_miliaceum_newGene_14459	0.206801	-1.23515	normal	0.00500296	-2.40151	down	0.202444	-1.92779	normal	0.0534497	-2.28946	normal	0.410777	-2.56879	normal
Panicum_miliaceum_newGene_14463	0.713433	-0.13047	normal	0.518662	-0.187494	normal	0.0650847	-0.546943	normal	0.000207718	-1.08919	down	0.000275195	-1.47647	down
Panicum_miliaceum_newGene_14470	0.321557	-0.493231	normal	0.00900833	-1.91993	down	0.00402669	-1.43616	down	0.376786	-0.468854	normal	0.814274	-0.139877	normal
Panicum_miliaceum_newGene_14489	0.0164039	0.688471	normal	0.0015598	1.03453	up	9.35221e-05	0.927742	up	0.00034721	1.02509	up	0.00339138	-1.35598	down
Panicum_miliaceum_newGene_1452	3.6081e-11	-1.38416	down	3.21272e-08	-1.29029	down	2.10903e-13	-2.61288	down	1.68471e-23	-4.16538	down	0.0592366	-1.93727	normal
Panicum_miliaceum_newGene_14522	0.231371	-0.762049	normal	0.00090673	-2.03261	down	4.31655e-05	-2.66488	down	0.023178	-2.06044	normal	0.267693	-0.931551	normal
Panicum_miliaceum_newGene_14528	0.0659437	-0.544157	normal	0.00265753	-0.975161	down	0.000140641	-0.960369	down	9.73873e-06	-1.04303	down	0.570481	-0.247528	normal
Panicum_miliaceum_newGene_1453	0.622483	-0.275655	normal	0.939724	0.041529	normal	0.0782185	-0.748403	normal	0.00567799	-1.59741	down	0.000445085	-3.1496	down
Panicum_miliaceum_newGene_1454	0.00168399	-1.11796	down	2.50526e-07	-2.0194	down	2.47318e-06	-1.73528	down	4.35238e-11	-2.26421	down	0.496523	-0.392087	normal
Panicum_miliaceum_newGene_14552	7.87292e-08	-7.53339	down	5.44998e-07	-7.09103	down	4.2756e-05	-3.61636	down	1.63275e-05	-4.54	down	0.223478	-1.30352	normal
Panicum_miliaceum_newGene_14576	0.382167	-0.327988	normal	0.053827	-0.632571	normal	0.00286102	-0.874431	down	0.0417533	-0.614458	normal	0.492431	0.290639	normal
Panicum_miliaceum_newGene_14577	0.00637912	-0.707193	down	0.000353999	-0.858365	down	0.000118842	-0.946047	down	0.00323066	-0.759159	down	0.536232	-0.401843	normal
Panicum_miliaceum_newGene_14587	0.0552753	-0.378139	normal	0.0701341	-0.533285	normal	2.42748e-06	-1.08589	down	0.0230736	-0.782499	normal	0.305059	-0.452648	normal
Panicum_miliaceum_newGene_14596	0.0778174	-0.532105	normal	3.97356e-05	-1.30569	down	0.00122338	-1.0832	down	0.007049	-0.946737	down	0.335743	0.369875	normal
Panicum_miliaceum_newGene_14607	0.00246529	-1.26741	down	8.259e-09	-1.68587	down	5.97981e-06	-1.37544	down	5.32614e-23	-3.40349	down	0.411842	0.372214	normal
Panicum_miliaceum_newGene_14629	0.0228011	-0.891046	normal	0.00357599	-1.74055	down	0.114808	-0.664554	normal	0.0103347	-1.26896	normal	0.641703	-0.344613	normal
Panicum_miliaceum_newGene_14639	0.0110369	-1.05485	normal	6.26372e-05	-1.50236	down	0.000433478	-1.56757	down	0.00107455	-1.32793	down	0.135122	-0.719235	normal
Panicum_miliaceum_newGene_14666	2.14107e-22	-2.20394	down	1.23621e-18	-2.54891	down	2.44733e-22	-2.55483	down	1.23904e-10	-2.10852	down	0.0860373	0.69951	normal
Panicum_miliaceum_newGene_1467	0.103538	-0.627835	normal	0.000347052	-1.96714	down	4.03557e-05	-2.33244	down	0.00112789	-1.46712	down	0.962539	0.0296932	normal
Panicum_miliaceum_newGene_14673	2.46457e-06	-2.71134	down	1.5806e-08	-7.68874	down	1.84493e-07	-4.44082	down	1.05616e-07	-5.54656	down	0.000509396	-2.09496	down
Panicum_miliaceum_newGene_14703	0.0481026	-0.512271	normal	0.084741	-0.500395	normal	0.243962	-0.366071	normal	0.0030644	-0.754838	down	0.0144943	-0.755093	normal
Panicum_miliaceum_newGene_14704	0.207101	-0.303773	normal	0.00877719	-0.602557	down	2.84431e-06	-1.00254	down	0.0218989	-0.572285	normal	0.709024	-0.131356	normal
Panicum_miliaceum_newGene_14719	0.219775	-0.410511	normal	0.001828	-0.916632	down	0.179605	-0.538296	normal	0.0156989	-1.06114	normal	0.800166	-0.184546	normal
Panicum_miliaceum_newGene_14721	0.143253	-0.327031	normal	0.0601426	-0.434599	normal	0.0387691	-0.473214	normal	0.000486317	-0.781596	down	0.564229	-0.192668	normal
Panicum_miliaceum_newGene_14748	0.390122	-0.219794	normal	0.00195548	-0.640891	down	0.0445636	-0.561701	normal	0.00552266	-0.809388	down	0.182261	0.397698	normal
Panicum_miliaceum_newGene_14772	0.00728985	-1.19339	down	0.048785	-0.98955	normal	0.00199372	-1.45977	down	0.171001	-0.610578	normal	0.0518355	-1.05202	normal
Panicum_miliaceum_newGene_14786	0.00528325	-0.637872	down	0.000416225	-0.880066	down	7.33032e-06	-1.0199	down	0.90901	-0.0419986	normal	0.407151	0.362351	normal
Panicum_miliaceum_newGene_14789	0.181568	-1.06013	normal	0.267008	-1.19967	normal	0.0110286	-1.77966	normal	0.000418918	-2.55645	down	0.79214	0.218807	normal
Panicum_miliaceum_newGene_14791	0.267468	-0.739444	normal	0.163817	-0.757421	normal	0.0322572	-1.12248	normal	4.37051e-05	-2.33031	down	0.805429	0.252416	normal
Panicum_miliaceum_newGene_148	0.0397464	-1.24546	normal	0.0113485	-1.60494	normal	0.000370183	-2.31419	down	8.21684e-08	-7.50406	down	0.0779005	-1.62218	normal
Panicum_miliaceum_newGene_14829	0.792839	0.180096	normal	0.78891	-0.14523	normal	0.0646496	-0.858937	normal	0.00815351	-1.22363	down	0.518805	0.380258	normal
Panicum_miliaceum_newGene_14830	0.44958	-0.411594	normal	0.0210082	-1.07352	normal	0.00574982	-0.852105	down	0.0367806	-0.852522	normal	0.00126529	0.937012	up
Panicum_miliaceum_newGene_14831	0.136069	-0.296487	normal	0.02945	-0.619338	normal	0.000601148	-0.802061	down	8.14394e-07	-0.986978	down	0.195286	0.370818	normal
Panicum_miliaceum_newGene_14849	0.140988	0.722321	normal	0.226415	0.612301	normal	0.443707	0.371947	normal	0.0409745	-1.10872	normal	0.00160197	-1.65692	down
Panicum_miliaceum_newGene_14855	0.927054	-0.0534163	normal	0.491051	-0.6512	normal	0.000170774	-1.57412	down	0.000104315	-1.5696	down	0.000126069	-2.12796	down
Panicum_miliaceum_newGene_14856	0.687898	-0.09746	normal	3.62781e-06	-1.51943	down	1.07462e-05	-1.54341	down	4.33631e-11	-1.53317	down	5.81362e-07	-1.40721	down
Panicum_miliaceum_newGene_14910	0.747078	-0.0928605	normal	0.745041	-0.132759	normal	0.000649468	-0.866064	down	3.72428e-07	-1.24477	down	0.0863182	-2.48861	normal
Panicum_miliaceum_newGene_14918	0.120927	-0.742372	normal	1.08921e-05	-2.30038	down	4.89349e-05	-2.84933	down	0.000125204	-1.82842	down	0.298554	-0.561904	normal
Panicum_miliaceum_newGene_14925	0.936494	-0.0592435	normal	0.0406323	-1.19958	normal	0.0794416	-1.12457	normal	0.0053556	-1.6212	down	0.473808	-0.559738	normal
Panicum_miliaceum_newGene_14934	0.149686	0.312546	normal	0.328594	-0.225299	normal	0.228081	-0.251163	normal	0.00059479	-0.80622	down	0.152295	-0.602468	normal
Panicum_miliaceum_newGene_14961	0.00392144	-0.92329	down	0.001119	-1.06498	down	0.015817	-0.63028	normal	0.226868	-0.319086	normal	0.383503	0.355852	normal
Panicum_miliaceum_newGene_14966	0.00112152	-0.682751	down	4.1614e-06	-0.923705	down	0.000256242	-0.764565	down	0.209661	-0.354848	normal	0.783733	-0.126037	normal
Panicum_miliaceum_newGene_14971	0.00685553	-1.18464	down	0.00940769	-0.986203	down	0.0391251	-0.978546	normal	0.0247848	-1.00504	normal	0.0082546	-1.2428	down
Panicum_miliaceum_newGene_14985	0.000251016	-0.906816	down	7.18567e-05	-1.073	down	0.0261779	-0.642419	normal	0.873692	-0.0557054	normal	0.91162	-0.0576526	normal
Panicum_miliaceum_newGene_14991	0.000145643	-0.832577	down	0.000315374	-0.824779	down	3.72097e-05	-1.42043	down	0.000548879	-1.29933	down	0.493357	-0.44087	normal
Panicum_miliaceum_newGene_15	3.95622e-11	-1.48419	down	2.83924e-06	-1.34361	down	0.00170295	-0.961846	down	0.000367583	-0.779336	down	0.341728	0.384329	normal
Panicum_miliaceum_newGene_15009	0.0293844	-0.43365	normal	0.442609	-0.185152	normal	0.000200348	-0.714933	down	0.00705502	-0.660942	down	0.647334	-0.192878	normal
Panicum_miliaceum_newGene_1501	0.514614	-0.186993	normal	0.00974159	-0.625454	down	0.54051	0.147952	normal	0.237997	0.265993	normal	0.936149	-0.0423212	normal
Panicum_miliaceum_newGene_1502	0.154818	-0.498626	normal	0.0189325	-2.47674	normal	0.446358	-1.30656	normal	1.17777e-10	-3.14245	down	0.52777	-1.24053	normal
Panicum_miliaceum_newGene_15093	0.0900391	-0.483984	normal	0.000971201	-1.0146	down	0.00180976	-1.23412	down	1.54221e-05	-1.10619	down	0.0681246	-0.485827	normal
Panicum_miliaceum_newGene_15127	0.00184186	-1.97693	down	0.0146061	-1.43913	normal	0.00831341	-1.6448	down	0.0836743	-0.916872	normal	0.83437	-0.16308	normal
Panicum_miliaceum_newGene_15128	0.132344	-0.511938	normal	0.020952	-0.808706	normal	0.114391	-0.489195	normal	0.00903477	-1.04505	down	0.342671	-0.57385	normal
Panicum_miliaceum_newGene_15138	0.759772	0.19049	normal	0.00141514	-2.09915	down	0.0453128	-1.05235	normal	0.00462177	-1.58231	down	0.0340189	-1.47367	normal
Panicum_miliaceum_newGene_15185	0.000122068	-1.42268	down	0.0225168	-1.18028	normal	0.274549	-0.39465	normal	0.369118	0.341643	normal	0.0539738	0.876927	normal
Panicum_miliaceum_newGene_15252	0.0171672	-0.558287	normal	0.000426948	-0.787992	down	8.20809e-05	-1.02538	down	0.00129313	-0.887301	down	0.699667	-0.154543	normal
Panicum_miliaceum_newGene_15256	0.328918	-0.359847	normal	0.000984948	-1.08546	down	0.22862	-0.587366	normal	0.000184212	-1.3654	down	0.715051	0.195476	normal
Panicum_miliaceum_newGene_15313	0.0132441	-0.610263	normal	0.00321916	-0.61363	down	0.0953127	-0.327502	normal	0.60774	0.112146	normal	0.0110642	0.780683	normal
Panicum_miliaceum_newGene_15319	0.764096	0.0987904	normal	0.421715	-0.347826	normal	0.53059	-0.218092	normal	0.000235131	-1.0032	down	0.481306	0.314625	normal
Panicum_miliaceum_newGene_15323	0.0912287	-0.668248	normal	0.107689	-0.678289	normal	0.00384813	-1.18466	down	0.00522843	-1.73935	down	0.465939	-1.3123	normal
Panicum_miliaceum_newGene_15324	0.223315	-0.281604	normal	0.000605124	-0.674836	down	0.000101076	-1.02116	down	0.000170854	-1.01811	down	0.124632	0.503492	normal
Panicum_miliaceum_newGene_15348	0.0124164	-0.957534	normal	0.0732927	-0.681861	normal	0.0330651	-0.889513	normal	0.0013538	-1.27486	down	1.41071e-05	1.37758	up
Panicum_miliaceum_newGene_15350	1.59574e-05	-0.934305	down	9.96439e-14	-1.09913	down	3.07973e-07	-1.11251	down	3.25934e-06	-0.824623	down	3.54014e-44	2.26903	up
Panicum_miliaceum_newGene_15351	0.566439	-0.165771	normal	0.0923968	-0.467324	normal	0.0013635	-0.722105	down	0.779597	0.0913557	normal	0.151669	0.513435	normal
Panicum_miliaceum_newGene_15352	0.424452	-0.249089	normal	0.0679233	-0.679659	normal	2.80685e-05	-1.69524	down	0.117778	-0.604168	normal	0.363496	0.36447	normal
Panicum_miliaceum_newGene_15360	0.531956	-0.445913	normal	0.000801476	-2.08271	down	9.26837e-06	-3.3036	down	0.0485414	-1.21221	normal	0.782619	0.237298	normal
Panicum_miliaceum_newGene_15361	0.0523803	-0.523371	normal	0.00539952	-0.842123	down	0.105842	-0.429968	normal	0.658897	-0.137059	normal	0.398692	-0.293152	normal
Panicum_miliaceum_newGene_15369	9.92622e-05	-1.32166	down	0.00371115	-1.06042	down	0.031772	-0.799778	normal	0.126528	-0.690998	normal	0.604704	0.254328	normal
Panicum_miliaceum_newGene_15406	0.0153851	-0.838946	normal	0.00810123	-0.905751	down	0.00985524	-0.941334	down	0.019656	-0.912379	normal	0.460785	-0.371562	normal
Panicum_miliaceum_newGene_1542	0.23032	-0.842999	normal	0.00999669	-1.44078	down	0.0734723	-1.06568	normal	0.00471568	-1.49956	down	0.909494	-0.111603	normal
Panicum_miliaceum_newGene_15441	0.00418992	-1.91102	down	0.000154515	-4.21231	down	0.0263744	-1.94079	normal	0.00208821	-2.96775	down	0.0524216	-1.40079	normal
Panicum_miliaceum_newGene_15454	0.000206398	-0.995328	down	1.22956e-06	-1.39507	down	1.65184e-05	-1.37511	down	2.3927e-06	-1.60658	down	0.733995	0.144704	normal
Panicum_miliaceum_newGene_15460	0.000247988	-1.02216	down	3.02251e-05	-1.23887	down	0.00442996	-0.729144	down	0.387071	-0.287441	normal	0.890333	0.0519672	normal
Panicum_miliaceum_newGene_15470	2.42669e-05	-1.53498	down	6.00866e-12	-2.29387	down	1.26226e-05	-1.98036	down	1.17901e-05	-1.87296	down	0.547842	-0.283708	normal
Panicum_miliaceum_newGene_15503	1.95482e-11	-0.991896	down	1.46617e-25	-1.74851	down	3.33398e-14	-1.66122	down	0.980549	-0.0114054	normal	0.938643	0.0403489	normal
Panicum_miliaceum_newGene_15516	0.559543	-0.234458	normal	0.676642	-0.181401	normal	0.0475822	-0.930172	normal	0.160569	-0.741986	normal	5.72465e-06	-1.6672	down
Panicum_miliaceum_newGene_15563	0.161111	-0.351621	normal	0.00195538	-0.800881	down	0.000310932	-0.845287	down	0.000807456	-0.803985	down	0.865317	0.0615965	normal
Panicum_miliaceum_newGene_15570	0.472351	0.180964	normal	0.0576996	0.339407	normal	0.783514	0.0611469	normal	0.028724	0.406545	normal	0.00229949	-0.772602	down
Panicum_miliaceum_newGene_15590	0.0181505	-1.19265	normal	0.000481687	-2.01948	down	0.000330109	-1.98408	down	0.000239951	-2.23092	down	0.197279	-0.709234	normal
Panicum_miliaceum_newGene_15595	0.614335	-0.3117	normal	0.97291	0.0222714	normal	0.154435	-0.784103	normal	0.00887494	-2.51767	down	0.00633958	-3.23528	down
Panicum_miliaceum_newGene_15630	0.011558	-1.71406	normal	6.72716e-08	-7.4218	down	0.000650624	-2.64073	down	2.12065e-05	-3.18817	down	0.930694	-0.0755223	normal
Panicum_miliaceum_newGene_15641	0.875673	-0.0965935	normal	0.170197	-0.67706	normal	0.00168505	-1.31408	down	0.501485	-0.40455	normal	0.10428	0.679193	normal
Panicum_miliaceum_newGene_15648	0.048896	-0.580471	normal	0.0155394	-0.875201	normal	0.00775569	-0.824743	down	0.530076	-0.232673	normal	0.444605	0.34671	normal
Panicum_miliaceum_newGene_15652	0.33157	-0.281567	normal	0.572087	-0.183089	normal	0.00283124	-0.732935	down	0.211368	-0.355583	normal	0.834396	-0.0927592	normal
Panicum_miliaceum_newGene_15653	1.45846e-05	-1.15279	down	3.74924e-06	-1.12713	down	9.45653e-11	-1.61776	down	0.000117053	-1.44157	down	0.824495	-0.121623	normal
Panicum_miliaceum_newGene_15656	0.0626759	-1.20427	normal	0.0233671	-1.06962	normal	2.99177e-05	-2.38175	down	9.30382e-05	-2.14757	down	0.164715	-0.784635	normal
Panicum_miliaceum_newGene_15669	0.00675327	-0.758296	down	0.257382	-0.326384	normal	0.99277	0.00354365	normal	0.00421605	0.642816	up	0.253557	0.315733	normal
Panicum_miliaceum_newGene_15678	0.158272	-0.538139	normal	0.00660778	-1.06596	down	0.00666752	-0.958152	down	2.52039e-06	-1.75462	down	0.228032	-0.514059	normal
Panicum_miliaceum_newGene_1568	0.440425	-0.427668	normal	0.0705592	-0.798835	normal	0.00507735	-1.21488	down	0.215516	-0.794393	normal	0.331463	-0.998876	normal
Panicum_miliaceum_newGene_15686	0.0426921	0.422459	normal	0.032335	0.629191	normal	0.331332	0.220427	normal	0.000528193	-0.668434	down	0.0100085	-0.980986	normal
Panicum_miliaceum_newGene_15691	0.0214272	-1.36096	normal	0.000437293	-2.92074	down	0.0991688	-1.50935	normal	9.25548e-05	-2.18555	down	0.763834	0.207383	normal
Panicum_miliaceum_newGene_15692	0.221122	0.661122	normal	0.872781	-0.284964	normal	0.0649967	0.982307	normal	0.041193	-1.2123	normal	0.000673667	-2.1765	down
Panicum_miliaceum_newGene_15726	0.511774	-0.178158	normal	0.000582179	-0.616198	down	0.000196132	-0.692182	down	0.0492617	-0.46861	normal	0.843981	0.0599857	normal
Panicum_miliaceum_newGene_15732	0.00369342	-1.38739	down	0.000137367	-2.4484	down	2.54199e-05	-2.11866	down	0.0947631	-0.870335	normal	0.135864	-1.69854	normal
Panicum_miliaceum_newGene_15742	9.0852e-18	1.94476	up	8.74462e-10	1.72169	up	9.24579e-32	2.55797	up	7.32544e-20	2.344	up	4.95998e-13	-2.77359	down
Panicum_miliaceum_newGene_15749	0.00549779	-0.922633	down	0.000495342	-0.940484	down	0.0183122	-0.616616	normal	0.0558873	-0.689431	normal	0.925003	-0.0425591	normal
Panicum_miliaceum_newGene_15769	0.353568	-0.213644	normal	0.00173571	-0.838071	down	0.0111337	-0.701745	normal	0.0160486	-0.75155	normal	0.890043	-0.0479968	normal
Panicum_miliaceum_newGene_15783	0.391815	-0.266444	normal	0.0487566	-0.843374	normal	0.0374637	-0.763608	normal	0.00258478	-1.13319	down	0.662459	-0.208539	normal
Panicum_miliaceum_newGene_15794	0.123069	-0.449309	normal	0.00123671	-0.856557	down	0.0131793	-0.692094	normal	0.338742	-0.290294	normal	0.243569	-0.34037	normal
Panicum_miliaceum_newGene_15797	2.46988e-08	-1.22387	down	8.5271e-05	-1.1724	down	9.27834e-05	-0.851279	down	0.96568	-0.0145539	normal	0.5636	-0.193557	normal
Panicum_miliaceum_newGene_15815	0.000134847	-1.67134	down	0.012872	-1.37986	normal	0.00156769	-1.25914	down	0.0934695	0.699466	normal	0.0597007	0.810565	normal
Panicum_miliaceum_newGene_15816	0.0596517	-0.671115	normal	0.00178995	-1.51657	down	0.00568782	-1.0432	down	2.81496e-05	-1.71411	down	0.237632	-0.740506	normal
Panicum_miliaceum_newGene_15820	0.240047	-0.350828	normal	0.027925	-0.857045	normal	0.313453	-0.421326	normal	0.00540027	-0.885907	down	0.935523	-0.0425063	normal
Panicum_miliaceum_newGene_15828	0.271447	-0.393208	normal	0.000619882	-1.1367	down	9.79791e-07	-1.20696	down	0.101736	-0.526888	normal	0.705988	-0.15479	normal
Panicum_miliaceum_newGene_15854	0.0200108	-0.774415	normal	0.0354893	-0.595729	normal	0.0272514	-0.62913	normal	0.00183917	-0.943674	down	0.316229	0.526922	normal
Panicum_miliaceum_newGene_15861	0.255393	-0.545473	normal	0.23469	-0.603857	normal	0.163454	-0.971875	normal	0.00149927	-1.69299	down	0.570481	-0.961064	normal
Panicum_miliaceum_newGene_15874	0.118014	0.262467	normal	0.451015	0.198054	normal	0.66828	-0.109938	normal	0.00150476	-0.627301	down	0.821803	-0.0849269	normal
Panicum_miliaceum_newGene_15877	0.00997502	-1.19604	down	0.000317062	-1.7303	down	7.13647e-06	-2.03328	down	1.49912e-07	-2.42235	down	0.00645724	-1.52159	down
Panicum_miliaceum_newGene_15882	0.0470289	-1.33673	normal	0.0064862	-2.03522	down	0.00689359	-1.82433	down	9.78194e-05	-4.37479	down	0.547824	0.59579	normal
Panicum_miliaceum_newGene_15903	0.294906	-0.587789	normal	0.0156143	-1.39415	normal	0.00645466	-1.62783	down	0.0347887	-1.11958	normal	0.319423	0.621577	normal
Panicum_miliaceum_newGene_15926	0.0602433	-0.659332	normal	0.0770373	-0.73736	normal	0.18164	-0.979617	normal	9.21828e-05	-1.68583	down	0.275841	-0.664558	normal
Panicum_miliaceum_newGene_15949	0.202423	-1.10523	normal	0.308462	-1.19623	normal	0.780056	-0.21179	normal	0.000461399	-2.16876	down	0.951116	0.0626194	normal
Panicum_miliaceum_newGene_15955	0.000905694	-0.724439	down	0.0119431	-0.867306	normal	3.55034e-07	-1.04276	down	1.38591e-06	-0.962711	down	0.0435265	0.458002	normal
Panicum_miliaceum_newGene_15961	0.784609	-0.101927	normal	0.179754	-0.455501	normal	0.0245482	-0.742067	normal	0.00624016	-0.90816	down	0.952877	-0.0347581	normal
Panicum_miliaceum_newGene_15990	0.0202766	0.427422	normal	0.130545	0.311012	normal	0.0301387	-0.556038	normal	2.56297e-11	-1.4323	down	4.33139e-05	0.97194	up
Panicum_miliaceum_newGene_16	0.059116	-0.472228	normal	2.86784e-05	-1.07414	down	0.000226076	-1.08454	down	1.18228e-05	-1.12579	down	0.585929	0.221526	normal
Panicum_miliaceum_newGene_16000	5.61397e-05	-1.01749	down	1.26209e-07	-1.48785	down	9.88786e-05	-1.11889	down	2.20454e-05	-1.2582	down	0.0903183	-0.883387	normal
Panicum_miliaceum_newGene_16018	0.916805	-0.0530258	normal	0.00719918	-1.1722	down	0.0302366	-1.05492	normal	0.152559	-0.836238	normal	0.248281	0.726908	normal
Panicum_miliaceum_newGene_16022	0.000541329	1.41074	up	5.18191e-20	2.9239	up	2.54925e-23	3.29013	up	1.20809e-15	3.66686	up	6.27823e-07	-5.9383	down
Panicum_miliaceum_newGene_16047	0.402165	-0.447182	normal	0.0154462	-1.33796	normal	0.000445232	-2.33639	down	0.000453817	-2.45184	down	0.0572905	1.12149	normal
Panicum_miliaceum_newGene_16053	0.00111198	-0.967266	down	1.82028e-05	-1.86408	down	0.00249788	-1.39266	down	3.01047e-06	-1.72054	down	0.938488	-0.0411362	normal
Panicum_miliaceum_newGene_16058	0.512539	-0.37291	normal	0.247338	0.522113	normal	0.24731	0.543283	normal	0.49379	-0.332052	normal	0.00193072	-2.09519	down
Panicum_miliaceum_newGene_16074	0.05539	-0.938032	normal	0.0940895	-1.19835	normal	0.000764084	-1.80256	down	0.241194	-0.720761	normal	0.474877	-0.473222	normal
Panicum_miliaceum_newGene_16083	0.142186	-0.7547	normal	0.0376972	-1.04981	normal	0.0174452	-1.25764	normal	9.34298e-06	-1.54851	down	0.839212	0.185791	normal
Panicum_miliaceum_newGene_1610	0.448512	-0.52775	normal	0.012147	-1.89095	normal	0.0280344	-1.98896	normal	0.00830942	-1.50421	down	0.16369	-1.08631	normal
Panicum_miliaceum_newGene_16138	0.00140134	-2.04191	down	0.000114931	-1.76314	down	3.65263e-08	-3.03741	down	4.31394e-08	-3.11127	down	0.313642	-0.760139	normal
Panicum_miliaceum_newGene_1616	0.0320249	-1.34201	normal	0.000831868	-2.16323	down	0.000149373	-3.04971	down	4.27835e-05	-2.40323	down	0.282924	-1.02816	normal
Panicum_miliaceum_newGene_16180	0.00126775	-0.59509	down	0.00218388	-0.713119	down	0.858696	-0.0541733	normal	0.0440706	0.43335	normal	0.629283	0.157129	normal
Panicum_miliaceum_newGene_162	0.0113981	-0.536727	normal	7.5014e-05	-0.979582	down	8.16144e-06	-0.981485	down	4.35622e-05	-0.802607	down	0.136161	-0.422918	normal
Panicum_miliaceum_newGene_16203	0.0055726	-0.711943	down	2.17236e-06	-1.40191	down	8.26947e-08	-1.65722	down	8.65811e-06	-1.30049	down	0.171174	0.442306	normal
Panicum_miliaceum_newGene_16218	0.155436	-0.560505	normal	0.0527737	-0.828593	normal	0.00698462	-1.08834	down	0.00064475	-1.3631	down	0.684449	-0.231368	normal
Panicum_miliaceum_newGene_16227	0.0723372	-0.49156	normal	0.000252541	-0.989659	down	8.78982e-05	-1.10705	down	0.0438172	-0.625058	normal	0.653245	0.190573	normal
Panicum_miliaceum_newGene_16261	0.0438635	-0.47071	normal	0.000266589	-0.771732	down	0.0145125	-0.591959	normal	0.0292773	-0.564004	normal	0.305305	0.439471	normal
Panicum_miliaceum_newGene_16295	0.0639402	-0.585208	normal	1.95012e-06	-1.48434	down	0.00530494	-1.03494	down	9.91569e-05	-1.21441	down	0.285416	-0.459387	normal
Panicum_miliaceum_newGene_16306	0.354045	-0.60042	normal	0.121639	-0.641098	normal	0.0030539	-1.23603	down	0.431232	-0.387946	normal	0.258674	-0.643619	normal
Panicum_miliaceum_newGene_16311	0.651488	-0.111381	normal	0.000212763	-0.712766	down	0.00787215	-0.657302	down	4.26155e-05	-0.747147	down	0.759739	0.0978314	normal
Panicum_miliaceum_newGene_16370	0.0899891	-0.503776	normal	0.00784442	-0.859062	down	0.0570487	-0.550064	normal	0.995561	-0.00210766	normal	0.00035535	1.13357	up
Panicum_miliaceum_newGene_16390	1.00843e-07	-1.52596	down	1.03129e-05	-1.86537	down	2.28885e-11	-2.39516	down	1.28934e-11	-2.56756	down	0.4805	-0.914762	normal
Panicum_miliaceum_newGene_16427	0.0220585	-1.38843	normal	0.504347	-0.511307	normal	0.264814	-0.665702	normal	0.00276151	-1.69587	down	0.0850072	-1.20217	normal
Panicum_miliaceum_newGene_16441	0.537767	-0.261753	normal	0.00554498	-0.98267	down	6.82635e-05	-1.76323	down	0.022286	-0.762652	normal	0.66216	0.213631	normal
Panicum_miliaceum_newGene_16461	0.000107358	-2.05811	down	6.08723e-08	-2.52051	down	1.0209e-05	-2.10631	down	3.8727e-07	-2.72787	down	0.0938276	-1.57407	normal
Panicum_miliaceum_newGene_16478	0.440806	-0.547319	normal	0.00147435	-1.65882	down	0.000873088	-1.5879	down	0.354763	-0.4754	normal	0.773325	0.201861	normal
Panicum_miliaceum_newGene_16483	0.115896	-0.454846	normal	0.000355516	-0.894739	down	0.00451498	-0.775584	down	0.957798	-0.0138865	normal	0.00374736	0.880625	up
Panicum_miliaceum_newGene_16484	0.29625	-0.367697	normal	0.000450905	-1.25941	down	0.0534259	-0.702379	normal	0.824428	-0.0947043	normal	0.423338	0.425224	normal
Panicum_miliaceum_newGene_16488	0.00380294	-0.832776	down	0.0270465	-1.01816	normal	1.77853e-06	-1.51839	down	2.16613e-14	-2.81092	down	0.0425216	-1.20617	normal
Panicum_miliaceum_newGene_16489	0.00186496	-0.606622	down	0.000237132	-0.773235	down	0.10718	-0.364472	normal	0.39384	-0.242744	normal	0.151757	0.446598	normal
Panicum_miliaceum_newGene_16495	0.338421	-0.443475	normal	0.423878	-0.340012	normal	0.205123	-0.50454	normal	3.44229e-05	-1.87552	down	0.728858	-0.200818	normal
Panicum_miliaceum_newGene_16501	5.07604e-05	-0.81391	down	1.24382e-05	-1.1422	down	1.99766e-05	-1.24522	down	0.0197369	-0.669035	normal	0.920523	-0.0431142	normal
Panicum_miliaceum_newGene_16514	0.0417473	-1.10686	normal	0.0443714	-1.22693	normal	0.0762944	-1.03698	normal	8.98189e-05	-2.3238	down	0.163819	-1.20934	normal
Panicum_miliaceum_newGene_16517	0.439167	0.201934	normal	0.391891	-0.232788	normal	0.604239	0.156428	normal	0.000159919	-0.961131	down	0.89463	0.0652269	normal
Panicum_miliaceum_newGene_16519	0.0576584	-1.31947	normal	0.00483644	-1.88174	down	3.60872e-08	-3.65698	down	1.47375e-05	-2.12302	down	0.564974	-0.363177	normal
Panicum_miliaceum_newGene_16528	0.000267953	-1.54145	down	0.00027595	-1.59621	down	3.37026e-07	-1.96607	down	2.30293e-06	-1.9652	down	0.480295	-0.413195	normal
Panicum_miliaceum_newGene_16532	0.296665	-0.383309	normal	0.0599118	-1.07075	normal	0.00272469	-1.11935	down	0.00388913	-1.07555	down	0.129456	-0.75693	normal
Panicum_miliaceum_newGene_16559	0.151718	-0.827096	normal	0.00285446	-1.9434	down	0.0958971	-1.25959	normal	0.0529641	-1.13714	normal	0.265933	0.788969	normal
Panicum_miliaceum_newGene_16579	0.0168681	-0.727269	normal	0.00219378	-1.01571	down	0.0110438	-0.756303	normal	0.0291274	-0.610898	normal	0.357165	0.335492	normal
Panicum_miliaceum_newGene_16586	0.361962	-0.494313	normal	0.0021433	-1.42552	down	0.00782201	-1.13818	down	3.75195e-05	-1.85162	down	0.00249581	-1.64197	down
Panicum_miliaceum_newGene_1661	0.102146	-0.393506	normal	0.00264474	-0.637463	down	0.0024496	-0.787058	down	0.29896	-0.243899	normal	0.0111001	0.765575	normal
Panicum_miliaceum_newGene_16610	0.24713	-0.696424	normal	0.0555526	-0.93048	normal	0.00150966	-1.20495	down	0.776372	-0.107968	normal	0.635097	0.23324	normal
Panicum_miliaceum_newGene_16614	0.00410239	-0.436678	normal	0.00132053	-0.925893	down	0.000265639	-0.858704	down	2.13618e-11	-1.23151	down	0.0291662	-0.614762	normal
Panicum_miliaceum_newGene_16618	0.416457	-0.452128	normal	0.0606	-0.920377	normal	0.00581186	-1.35268	down	0.000335129	-1.76318	down	0.425008	-0.43596	normal
Panicum_miliaceum_newGene_16629	0.197287	-0.448168	normal	0.00594766	-0.909401	down	0.136555	-0.454669	normal	0.772148	-0.0988437	normal	0.20942	-0.512489	normal
Panicum_miliaceum_newGene_16633	0.04787	-1.12458	normal	0.0321589	-1.33008	normal	0.116941	-1.16786	normal	0.00469714	-2.20615	down	0.662854	-0.339208	normal
Panicum_miliaceum_newGene_16635	0.225843	-3.09309	normal	4.65799e-06	-4.59424	down	4.54962e-08	-7.40351	down	1.155e-08	-7.76053	down	0.412306	-1.25707	normal
Panicum_miliaceum_newGene_16717	0.024356	-0.404708	normal	0.00225149	-0.588637	down	0.00286459	-0.494371	normal	0.381489	-0.193371	normal	0.395737	0.17498	normal
Panicum_miliaceum_newGene_16721	0.166671	-0.385764	normal	0.474257	-0.21764	normal	0.447334	-0.241702	normal	0.990156	-0.00557617	normal	0.000203824	-1.19584	down
Panicum_miliaceum_newGene_16724	0.931127	0.0453563	normal	0.274714	-0.425948	normal	0.642105	-0.285687	normal	1.67697e-05	-1.84995	down	0.666455	0.257474	normal
Panicum_miliaceum_newGene_1673	0.000459172	-1.05099	down	0.0285191	-0.726587	normal	2.24856e-11	-2.02761	down	5.52076e-08	-2.15307	down	0.994537	-0.0174335	normal
Panicum_miliaceum_newGene_16733	0.962818	-0.0208543	normal	0.597935	-0.197885	normal	0.00870502	-0.852446	down	0.350983	-0.393822	normal	0.756823	0.163985	normal
Panicum_miliaceum_newGene_16745	0.0657509	-0.536775	normal	5.22693e-05	-1.02438	down	0.00281687	-1.24921	down	6.49717e-07	-1.58447	down	0.239243	0.405108	normal
Panicum_miliaceum_newGene_16751	8.46244e-06	-0.890458	down	3.66704e-09	-2.01121	down	3.0572e-07	-1.81607	down	6.25076e-14	-1.827	down	0.23673	0.365581	normal
Panicum_miliaceum_newGene_16754	2.84901e-12	-1.78546	down	0.0226632	-1.67472	normal	0.0174174	-0.690924	normal	0.0034755	-2.07037	down	0.196456	0.54921	normal
Panicum_miliaceum_newGene_16755	0.0424861	-0.850734	normal	0.0433257	-0.801664	normal	0.015818	-1.01104	normal	0.000107425	-1.60365	down	0.420874	0.601087	normal
Panicum_miliaceum_newGene_16770	0.0626595	-0.772538	normal	0.0918545	-0.832178	normal	0.00338606	-1.32419	down	0.0153429	-1.43331	normal	0.258345	0.541399	normal
Panicum_miliaceum_newGene_16771	0.210008	-0.559594	normal	0.230265	-0.657317	normal	0.000259622	-1.8531	down	0.00313898	-1.32697	down	0.141516	-0.76845	normal
Panicum_miliaceum_newGene_16775	0.0169099	-1.12219	normal	0.021166	-1.48041	normal	0.000100599	-1.75696	down	1.61958e-05	-1.9498	down	0.301255	-0.564545	normal
Panicum_miliaceum_newGene_16782	0.00117101	-0.922978	down	3.01266e-06	-1.18843	down	0.0119367	-0.7134	normal	0.00154217	-0.952282	down	0.236967	-0.651372	normal
Panicum_miliaceum_newGene_16783	0.000686649	-1.16158	down	8.31491e-06	-2.07192	down	6.86405e-06	-1.96392	down	0.000111201	-1.64051	down	0.737116	-0.196748	normal
Panicum_miliaceum_newGene_16796	0.156003	-0.350377	normal	8.56241e-07	-1.18258	down	0.000293715	-0.798802	down	0.00579416	-0.753138	down	0.147111	-0.396335	normal
Panicum_miliaceum_newGene_16829	0.231135	-0.455575	normal	0.0069319	-1.16229	down	0.00499832	-1.30033	down	0.0754953	-0.797754	normal	0.212361	0.598623	normal
Panicum_miliaceum_newGene_16835	0.16352	-0.247417	normal	0.0452418	-0.369429	normal	5.75336e-08	-0.968682	down	1.97108e-05	-0.731234	down	0.694424	-0.129138	normal
Panicum_miliaceum_newGene_16848	9.90801e-06	-0.827403	down	6.41153e-09	-1.14111	down	0.000260748	-0.794219	down	0.318376	-0.257717	normal	0.717933	0.119881	normal
Panicum_miliaceum_newGene_16863	0.526912	-0.312751	normal	0.105374	-0.645443	normal	0.0289741	-0.949084	normal	0.00049888	-1.81642	down	0.709683	-0.210243	normal
Panicum_miliaceum_newGene_1688	7.78609e-05	-2.32026	down	0.00602379	-1.72753	down	0.00189826	-2.01945	down	0.0027031	-1.74984	down	0.86508	-0.128808	normal
Panicum_miliaceum_newGene_16903	0.0105294	-0.603987	normal	3.11583e-08	-1.16165	down	0.00108267	-0.908142	down	1.24285e-10	-2.11937	down	0.00189787	-0.722009	down
Panicum_miliaceum_newGene_16906	0.329937	-0.21686	normal	0.37851	-0.173654	normal	0.676744	0.116266	normal	0.305638	-0.266382	normal	0.00694222	-0.714905	down
Panicum_miliaceum_newGene_16916	3.69241e-10	-1.076	down	1.43139e-13	-1.40069	down	3.37422e-07	-1.30862	down	6.01535e-11	-1.36288	down	0.760033	-0.0676886	normal
Panicum_miliaceum_newGene_16932	0.179862	-0.277069	normal	0.00356354	-0.465614	normal	4.28556e-07	-0.969106	down	5.5153e-19	-1.4056	down	0.167217	-0.530827	normal
Panicum_miliaceum_newGene_1695	0.533315	-0.170884	normal	0.00228247	-0.709184	down	0.178864	-0.340964	normal	0.75371	-0.0887236	normal	0.52324	-0.216584	normal
Panicum_miliaceum_newGene_1697	0.0135513	-0.722844	normal	0.0129408	-0.639769	normal	0.000661742	-1.17156	down	0.039233	-0.865137	normal	0.75891	0.143648	normal
Panicum_miliaceum_newGene_16974	0.0977971	-0.338234	normal	0.00383857	-0.657735	down	0.0299129	-0.408819	normal	0.230832	-0.314152	normal	0.0499597	-0.63373	normal
Panicum_miliaceum_newGene_1700	0.19829	-0.256243	normal	0.00967001	-0.598207	down	0.253524	-0.331394	normal	0.955501	0.0190967	normal	0.449922	0.348579	normal
Panicum_miliaceum_newGene_17083	0.157778	0.296822	normal	0.105551	0.488882	normal	8.1045e-06	0.814679	up	0.261643	0.29014	normal	0.00875383	-0.893096	down
Panicum_miliaceum_newGene_17124	0.646564	-0.130908	normal	0.198056	-0.359806	normal	1.03785e-05	-1.07556	down	0.000131149	-0.974587	down	0.918231	-0.0667053	normal
Panicum_miliaceum_newGene_17138	0.556383	-0.515253	normal	0.190136	-0.793803	normal	0.00740265	-1.65919	down	0.0542635	-1.03815	normal	0.433203	-1.45151	normal
Panicum_miliaceum_newGene_17181	0.57897	-0.404419	normal	0.00538726	-1.44386	down	0.0830307	-0.922143	normal	0.0848113	-0.800959	normal	0.302539	0.581492	normal
Panicum_miliaceum_newGene_17191	0.121301	-0.372802	normal	0.00563002	-0.773867	down	0.0713711	-0.422765	normal	0.902674	-0.0348408	normal	0.0647727	-0.487689	normal
Panicum_miliaceum_newGene_17370	0.000303894	-2.33468	down	0.0847382	-2.16431	normal	0.000228491	-3.9736	down	0.000125278	-3.27147	down	0.820906	1.09353	normal
Panicum_miliaceum_newGene_17378	0.416399	-0.285291	normal	0.891369	-0.0505984	normal	0.000620764	-1.06144	down	0.345852	-0.498251	normal	0.209405	0.627492	normal
Panicum_miliaceum_newGene_17531	0.0524064	-0.352629	normal	0.000637702	-0.777556	down	6.13589e-08	-1.12559	down	0.000187647	-0.738032	down	0.124724	-0.352845	normal
Panicum_miliaceum_newGene_17547	0.00651305	-0.579047	normal	0.00212484	-0.77018	down	1.09851e-08	-1.54041	down	1.23243e-05	-1.15235	down	0.823908	-0.0944498	normal
Panicum_miliaceum_newGene_17552	0.000818384	-1.92949	down	0.000971398	-2.9124	down	0.0131306	-1.44913	normal	0.00157096	-1.9478	down	0.00296806	-2.04718	down
Panicum_miliaceum_newGene_17558	0.0168019	-1.44251	normal	0.00831611	-1.28771	down	0.00343885	-1.6012	down	0.00872148	-1.18095	down	0.790774	-0.172498	normal
Panicum_miliaceum_newGene_17561	0.869743	-0.119183	normal	0.0255989	-1.56768	normal	0.00555195	-1.51538	down	0.0757382	-0.943415	normal	0.0558991	-1.24213	normal
Panicum_miliaceum_newGene_17567	0.00164001	-0.798192	down	1.16789e-06	-1.41142	down	0.000190567	-1.21547	down	0.0138581	-0.793771	normal	0.0971934	-0.657372	normal
Panicum_miliaceum_newGene_17571	0.0790113	-0.468496	normal	0.00619239	-0.739806	down	0.00139122	-0.819376	down	0.210022	-0.428666	normal	0.939045	-0.0431825	normal
Panicum_miliaceum_newGene_17592	0.396443	-0.522475	normal	0.0114718	-1.66476	normal	0.00741701	-1.59195	down	0.000125956	-2.3099	down	0.459879	-0.579094	normal
Panicum_miliaceum_newGene_17595	0.150274	-0.498179	normal	0.367347	-0.402003	normal	0.00119023	-1.11541	down	0.0083108	-1.26189	down	0.96347	0.0535273	normal
Panicum_miliaceum_newGene_1760	0.000460113	-1.26734	down	2.15866e-05	-1.01523	down	0.00918765	-1.00671	down	0.124877	-0.5078	normal	0.22051	-0.684117	normal
Panicum_miliaceum_newGene_17632	0.0969979	-0.748414	normal	0.00396203	-1.55263	down	0.0805282	-1.04721	normal	0.000894978	-1.7125	down	0.0901338	-1.17064	normal
Panicum_miliaceum_newGene_1764	0.927957	-0.0504945	normal	0.092372	-1.28338	normal	0.00123761	-1.63541	down	0.086988	-0.773996	normal	0.246477	0.741028	normal
Panicum_miliaceum_newGene_1766	0.00323331	-0.953705	down	1.73783e-14	-3.10534	down	9.41963e-08	-2.41248	down	4.47119e-09	-2.94662	down	0.0261628	0.642584	normal
Panicum_miliaceum_newGene_17679	0.0381106	-0.693427	normal	8.22588e-05	-1.38746	down	0.000334399	-1.30155	down	0.0153177	-0.861973	normal	0.717094	0.201706	normal
Panicum_miliaceum_newGene_17683	0.0998191	-0.430034	normal	0.667108	-0.105345	normal	0.00783772	-0.845583	down	3.03249e-08	-1.8515	down	0.143262	-3.33873	normal
Panicum_miliaceum_newGene_17685	0.216804	-0.626965	normal	7.74105e-06	-2.77385	down	0.000482719	-2.14638	down	1.16015e-05	-2.63755	down	0.879545	0.13958	normal
Panicum_miliaceum_newGene_17688	0.0170368	-0.59856	normal	2.2271e-05	-1.01239	down	4.51471e-07	-1.10503	down	0.000184001	-0.994969	down	0.0278929	-0.548793	normal
Panicum_miliaceum_newGene_17689	8.32126e-12	-3.29557	down	1.55717e-17	-5.40156	down	2.11546e-10	-3.99141	down	4.55527e-14	-3.9791	down	3.27427e-07	-2.24737	down
Panicum_miliaceum_newGene_17690	0.038009	-0.901838	normal	0.00380464	-0.957781	down	0.0516811	-0.80005	normal	0.0546927	-0.747633	normal	0.302912	-0.50411	normal
Panicum_miliaceum_newGene_17696	0.853462	-0.109048	normal	0.99062	-0.0067268	normal	0.310602	0.488321	normal	0.000357133	-1.86176	down	0.166788	-1.19163	normal
Panicum_miliaceum_newGene_17700	8.01297e-05	-0.957522	down	2.37657e-07	-1.30825	down	0.000261402	-1.58095	down	1.24693e-05	-1.03509	down	0.439695	-0.354548	normal
Panicum_miliaceum_newGene_1771	4.67251e-21	1.17626	up	4.19426e-38	1.70937	up	1.9571e-44	2.06194	up	2.03753e-25	2.39252	up	2.81219e-30	-1.63369	down
Panicum_miliaceum_newGene_17719	0.00585431	-0.757231	down	3.39064e-05	-1.25654	down	0.000807085	-0.956563	down	0.0308103	-0.604072	normal	0.922151	0.0454059	normal
Panicum_miliaceum_newGene_17737	0.769505	-0.0825126	normal	0.0873479	-0.464345	normal	0.0857817	-0.387263	normal	0.00095381	-1.03152	down	0.986212	0.0087076	normal
Panicum_miliaceum_newGene_17741	0.36307	-0.279269	normal	0.155073	-0.483405	normal	0.0190974	-0.800667	normal	0.000788494	-0.994893	down	0.950531	-0.0305651	normal
Panicum_miliaceum_newGene_17768	0.0176131	-0.764078	normal	0.00024265	-1.24982	down	0.00105631	-1.59226	down	1.67955e-06	-1.98808	down	0.604509	0.246413	normal
Panicum_miliaceum_newGene_17769	0.245327	-0.508066	normal	0.324967	-0.510469	normal	0.235335	-0.694148	normal	2.19444e-05	-2.01033	down	0.359177	0.60118	normal
Panicum_miliaceum_newGene_17790	0.964594	-0.0401477	normal	0.0257611	-1.06299	normal	0.00236994	-1.39073	down	0.219512	-1.02715	normal	0.371698	-0.534159	normal
Panicum_miliaceum_newGene_1780	0.0131984	-0.681816	normal	0.000226022	-1.17692	down	1.51304e-05	-1.32608	down	0.0118151	-0.754951	normal	0.0900689	-0.617446	normal
Panicum_miliaceum_newGene_17822	0.257138	-0.591293	normal	0.000748858	-1.75958	down	0.0206409	-1.6266	normal	0.0392131	-1.03916	normal	0.24624	-0.654477	normal
Panicum_miliaceum_newGene_17823	0.00680363	-0.658244	down	0.00133828	-0.760611	down	0.000496486	-0.899723	down	0.25722	-0.356767	normal	0.484948	-0.256615	normal
Panicum_miliaceum_newGene_17865	0.492866	-0.258355	normal	0.00986412	-0.909342	down	0.0335958	-0.859784	normal	0.183003	-0.461301	normal	0.1538	-0.551104	normal
Panicum_miliaceum_newGene_17890	0.320065	-0.396511	normal	0.0733358	-0.635294	normal	2.27711e-08	-1.5425	down	0.02355	-0.758704	normal	0.167756	-1.27426	normal
Panicum_miliaceum_newGene_17895	0.0189289	-0.605749	normal	4.0977e-09	-1.23956	down	2.0695e-05	-0.991812	down	1.51596e-05	-1.20381	down	0.539639	-0.222488	normal
Panicum_miliaceum_newGene_17896	6.06294e-18	-2.65067	down	1.54878e-15	-3.89702	down	2.90655e-52	-5.01198	down	0.000598715	-3.26955	down	0.989739	0.0115495	normal
Panicum_miliaceum_newGene_17905	0.33057	-0.775833	normal	0.00884705	-1.52348	down	0.0806439	-1.03871	normal	0.235797	-0.647952	normal	0.643289	-0.351173	normal
Panicum_miliaceum_newGene_17906	4.26119e-05	-1.72538	down	1.24063e-09	-2.57678	down	0.00853736	-3.76174	down	9.52087e-14	-3.48268	down	0.771065	-0.604196	normal
Panicum_miliaceum_newGene_17933	0.0960409	-0.480955	normal	0.118106	-0.493333	normal	0.00551312	-0.819094	down	0.796648	-0.0888783	normal	0.155678	0.549409	normal
Panicum_miliaceum_newGene_17934	0.258022	-0.224767	normal	0.0579274	-0.381151	normal	0.000809617	-0.665124	down	0.0015963	-0.700526	down	0.18965	0.271502	normal
Panicum_miliaceum_newGene_17946	0.959384	0.0163785	normal	0.550832	0.143875	normal	0.894076	-0.0360742	normal	0.459993	0.183161	normal	0.00820049	-1.42718	down
Panicum_miliaceum_newGene_17969	0.0871385	-0.442983	normal	0.0109558	-0.732672	normal	8.09071e-07	-1.1669	down	0.570339	-0.212804	normal	0.0182989	-0.607179	normal
Panicum_miliaceum_newGene_17973	1.072e-10	-1.79032	down	5.8732e-28	-2.73153	down	9.67899e-14	-2.56035	down	2.58443e-10	-3.10895	down	0.0207489	-0.917316	normal
Panicum_miliaceum_newGene_17986	0.0147749	-1.2027	normal	0.000349345	-1.9262	down	0.063468	-0.919902	normal	1.29247e-05	-2.32921	down	0.772547	0.310838	normal
Panicum_miliaceum_newGene_18	0.00185035	-0.701579	down	0.00215433	-0.890876	down	0.00015621	-0.892055	down	3.82648e-06	-1.21108	down	0.20215	0.397933	normal
Panicum_miliaceum_newGene_18002	0.65622	-0.220201	normal	0.0798726	-1.14165	normal	0.0069435	-1.62707	down	0.452156	0.316933	normal	0.40159	0.412206	normal
Panicum_miliaceum_newGene_18003	1.04889e-05	-0.882997	down	0.000273368	-0.857182	down	0.623778	-0.133409	normal	0.222479	-0.470777	normal	0.601702	-0.232751	normal
Panicum_miliaceum_newGene_18012	0.00575156	-0.709563	down	0.149353	-0.459804	normal	0.514109	-0.188759	normal	0.957918	0.0185969	normal	0.321991	-0.411206	normal
Panicum_miliaceum_newGene_1802	0.0224302	-0.548359	normal	0.00838889	-0.892361	down	0.205784	-0.327054	normal	0.55829	-0.163162	normal	0.656295	0.172944	normal
Panicum_miliaceum_newGene_18021	7.8971e-05	-0.739093	down	0.0011139	-0.612734	down	2.54554e-08	-1.09597	down	0.15434	-0.398773	normal	0.439695	-0.327697	normal
Panicum_miliaceum_newGene_18026	0.0324173	-0.508826	normal	0.00741102	-0.694722	down	1.05892e-06	-1.23861	down	0.00117667	-0.897743	down	0.445784	-0.341109	normal
Panicum_miliaceum_newGene_18031	0.232645	-0.354026	normal	0.0440912	-0.590231	normal	0.00673336	-0.775353	down	0.104894	-0.429119	normal	0.767269	0.118951	normal
Panicum_miliaceum_newGene_18039	0.650652	0.380427	normal	0.714692	-0.65729	normal	0.551011	-0.924996	normal	0.000104182	-2.83389	down	0.0399731	-3.57096	normal
Panicum_miliaceum_newGene_18064	0.838056	-0.111708	normal	0.00990116	-1.07621	down	0.042581	-0.762044	normal	0.260761	-0.444439	normal	0.817116	0.142245	normal
Panicum_miliaceum_newGene_18090	0.0202457	-0.527813	normal	0.000295322	-0.919266	down	0.00198504	-0.959635	down	3.63603e-05	-1.28293	down	0.801318	0.0971156	normal
Panicum_miliaceum_newGene_18097	0.0556685	-0.504518	normal	0.000138724	-1.34501	down	0.00296518	-1.04022	down	1.85177e-09	-1.75968	down	0.855123	0.116059	normal
Panicum_miliaceum_newGene_18172	0.238358	0.2001	normal	0.0143228	0.518127	normal	0.650851	0.109372	normal	0.641852	-0.0899996	normal	0.0074621	-0.695015	down
Panicum_miliaceum_newGene_18190	0.90284	0.0330468	normal	0.577723	0.13265	normal	0.271959	0.201442	normal	0.282671	0.212955	normal	0.00268422	-0.679398	down
Panicum_miliaceum_newGene_18224	0.213684	-0.813772	normal	0.00399381	-1.65511	down	0.0103747	-1.57481	normal	0.00323198	-1.81871	down	0.889069	0.117027	normal
Panicum_miliaceum_newGene_18234	0.858674	-0.0663243	normal	0.00559632	-0.753887	down	0.0127441	-0.702798	normal	0.439528	-0.227122	normal	0.796462	0.105746	normal
Panicum_miliaceum_newGene_18268	6.10719e-07	-1.18041	down	2.81038e-05	-1.31441	down	0.00146302	-0.839073	down	0.00490028	-0.705421	down	0.788455	-0.141386	normal
Panicum_miliaceum_newGene_18272	0.640529	-0.165305	normal	0.0598187	-0.629961	normal	0.00313987	-0.862705	down	2.61275e-05	-1.24046	down	0.244583	-0.629143	normal
Panicum_miliaceum_newGene_183	0.0503984	0.632961	normal	1.3742e-07	1.27226	up	2.00675e-07	1.52236	up	0.0874125	0.455695	normal	0.000123402	-1.22223	down
Panicum_miliaceum_newGene_18306	0.00253176	-1.6652	down	0.101601	-1.74149	normal	4.55665e-05	-2.67104	down	0.00038451	-2.02513	down	0.111305	-1.31949	normal
Panicum_miliaceum_newGene_18308	0.00240296	-0.78224	down	0.00178736	-0.744794	down	0.00475356	-0.733718	down	0.0264641	-0.618067	normal	0.950976	-0.0258843	normal
Panicum_miliaceum_newGene_18368	0.452248	-0.453048	normal	0.252334	-0.730404	normal	0.0197783	-2.06444	normal	0.00712	-1.77724	down	0.341787	-2.25636	normal
Panicum_miliaceum_newGene_18375	0.000937446	-0.955134	down	0.0249737	-0.86098	normal	0.0658448	-0.613195	normal	0.00595054	-1.21955	down	0.544748	-0.392833	normal
Panicum_miliaceum_newGene_18392	0.105799	-0.585495	normal	0.000288925	-0.932467	down	0.00191214	-0.73932	down	6.02288e-06	-0.994394	down	0.0420697	-0.476314	normal
Panicum_miliaceum_newGene_18446	0.0140915	-0.816646	normal	0.00146812	-1.53886	down	0.0190306	-1.43479	normal	0.0139996	-1.34992	normal	0.256601	-0.556633	normal
Panicum_miliaceum_newGene_18464	0.358203	-0.519818	normal	0.224789	-0.592504	normal	0.0704702	-0.881952	normal	0.0158664	-1.16234	normal	1.52098e-05	-3.36078	down
Panicum_miliaceum_newGene_18481	0.0571211	-0.43494	normal	0.00226728	-0.697888	down	0.865367	-0.0497355	normal	0.196738	-0.456007	normal	0.848763	-0.108275	normal
Panicum_miliaceum_newGene_18488	0.0767704	-0.486551	normal	0.00620551	-0.813448	down	0.0274894	-0.611759	normal	0.0660522	-0.510584	normal	0.262771	-0.449149	normal
Panicum_miliaceum_newGene_18509	0.218839	-0.315188	normal	0.0289436	-0.527555	normal	0.00164006	-0.791441	down	0.0857261	-0.515856	normal	0.187358	0.525524	normal
Panicum_miliaceum_newGene_18524	6.9112e-12	-2.59656	down	2.94401e-21	-3.92176	down	7.34814e-26	-4.30955	down	5.81143e-06	-2.63438	down	7.09567e-13	-3.31922	down
Panicum_miliaceum_newGene_18525	0.159525	-0.437578	normal	0.0731683	-0.661033	normal	0.00761931	-0.812787	down	0.469101	-0.318771	normal	0.53926	0.259146	normal
Panicum_miliaceum_newGene_1853	0.0615675	-0.92003	normal	0.00295808	-1.48309	down	0.213235	-0.626494	normal	2.3356e-07	-3.10771	down	0.0739156	-1.13271	normal
Panicum_miliaceum_newGene_18534	4.59604e-05	-1.12103	down	8.24134e-06	-1.44316	down	0.000129657	-1.05999	down	0.000453285	-1.2386	down	0.39198	-0.444174	normal
Panicum_miliaceum_newGene_18541	0.193593	-0.422099	normal	0.00210719	-1.1791	down	0.000869134	-1.25228	down	0.000179859	-1.23167	down	0.681008	-0.186863	normal
Panicum_miliaceum_newGene_18543	0.0202631	-1.74725	normal	3.30186e-05	-2.91838	down	7.53616e-05	-3.15724	down	1.64196e-05	-2.87552	down	0.21177	0.595607	normal
Panicum_miliaceum_newGene_18595	0.735611	-0.122064	normal	0.0825256	-0.606599	normal	0.00395218	-0.711439	down	0.371191	-0.217754	normal	0.140624	0.416584	normal
Panicum_miliaceum_newGene_18596	0.20633	-0.625451	normal	0.000319495	-1.61688	down	0.0462243	-1.11447	normal	0.311745	-0.369954	normal	0.000255426	-1.89497	down
Panicum_miliaceum_newGene_1861	0.0165093	-0.981008	normal	0.00341618	-2.12078	down	0.00351074	-2.39423	down	0.0235243	-2.18318	normal	0.204699	-0.77566	normal
Panicum_miliaceum_newGene_18615	4.71025e-07	-0.844974	down	4.1077e-10	-1.00659	down	0.00139149	-0.680253	down	1.67936e-06	-1.26336	down	0.309469	-0.367379	normal
Panicum_miliaceum_newGene_18618	0.00484	-0.553713	normal	1.0432e-05	-0.881076	down	0.00138738	-0.62359	down	0.0611086	-0.390267	normal	0.613822	-0.148573	normal
Panicum_miliaceum_newGene_18645	2.62219e-06	-1.83768	down	0.0836132	-0.748764	normal	0.00788664	-1.28682	down	0.0337103	-1.26373	normal	0.373614	-1.38484	normal
Panicum_miliaceum_newGene_18666	0.323041	-0.352221	normal	0.630815	-0.160433	normal	0.004311	-0.840886	down	0.653667	-0.141464	normal	0.897665	0.0596146	normal
Panicum_miliaceum_newGene_18669	0.879441	0.089579	normal	0.831579	-0.0992226	normal	0.107719	-0.627071	normal	0.00494798	-1.23801	down	0.0451397	-1.27031	normal
Panicum_miliaceum_newGene_1886	0.0576126	-0.460377	normal	0.00559144	-0.770026	down	0.00023315	-0.969027	down	0.0372918	-0.598191	normal	0.989623	-0.00668813	normal
Panicum_miliaceum_newGene_1889	0.412623	0.244	normal	0.614674	-0.158675	normal	0.00692421	0.566872	normal	0.0226774	0.530502	normal	3.43433e-11	-1.92914	down
Panicum_miliaceum_newGene_1892	1.43526e-06	-1.52031	down	0.00103101	-1.64485	down	4.474e-06	-1.59493	down	5.4722e-07	-2.11031	down	1.17305e-05	-1.93158	down
Panicum_miliaceum_newGene_1896	0.0385727	-0.521939	normal	1.75253e-07	-1.30319	down	0.00538668	-0.823821	down	0.000226022	-0.91003	down	0.894163	0.0641426	normal
Panicum_miliaceum_newGene_19	0.00525594	-0.763687	down	0.00225164	-0.877568	down	0.00551266	-0.994902	down	3.05294e-10	-1.89437	down	0.862286	-0.116598	normal
Panicum_miliaceum_newGene_190	0.00256657	-0.592927	down	0.000132946	-0.890165	down	0.000869134	-0.70667	down	0.0179471	-0.523476	normal	0.977339	0.0114675	normal
Panicum_miliaceum_newGene_1913	0.0341904	-0.44696	normal	0.00100148	-0.605351	down	0.000999766	-0.597394	down	0.000950246	-0.666834	down	0.899521	0.0464615	normal
Panicum_miliaceum_newGene_1931	0.318054	0.330517	normal	0.393545	-0.302711	normal	0.624649	0.172254	normal	4.93015e-05	-0.986764	down	0.0906292	-0.764863	normal
Panicum_miliaceum_newGene_1932	0.721855	-0.125298	normal	0.00948462	-1.06941	down	0.669172	0.201931	normal	0.0216481	-1.11197	normal	0.286498	-0.668355	normal
Panicum_miliaceum_newGene_1939	0.154486	-0.302542	normal	0.155671	-0.267392	normal	0.0156732	-0.442963	normal	0.000705901	-0.767498	down	0.0654716	-0.459018	normal
Panicum_miliaceum_newGene_1943	0.256634	0.493095	normal	0.109946	0.715782	normal	0.629453	0.237272	normal	0.144436	-0.712538	normal	0.000525428	-2.12816	down
Panicum_miliaceum_newGene_1959	0.00105747	-2.02214	down	0.000260363	-2.33148	down	0.00225839	-2.09982	down	4.4923e-05	-2.8502	down	0.0308842	-1.79555	normal
Panicum_miliaceum_newGene_1973	3.84002e-05	-0.78064	down	4.93164e-07	-0.981809	down	6.29174e-06	-1.06673	down	8.68515e-21	-2.37108	down	9.40734e-07	-1.43649	down
Panicum_miliaceum_newGene_1988	0.537899	-0.320635	normal	0.0115185	-0.984131	normal	0.0385427	-1.52058	normal	1.89994e-06	-2.49219	down	5.17507e-07	-2.12837	down
Panicum_miliaceum_newGene_1993	0.182369	-0.677234	normal	0.00351963	-1.71063	down	0.00494949	-1.52068	down	0.000146756	-1.98726	down	0.791721	-0.182481	normal
Panicum_miliaceum_newGene_1994	0.680368	-0.171428	normal	0.631967	0.157275	normal	0.0238404	0.784223	normal	0.319596	0.269068	normal	0.00172755	-1.39695	down
Panicum_miliaceum_newGene_2001	4.16902e-29	-1.91097	down	7.10799e-19	-1.77888	down	1.23953e-16	-1.82764	down	3.07689e-50	-3.83517	down	0.840758	0.153557	normal
Panicum_miliaceum_newGene_2007	0.00399904	-0.657911	down	4.30759e-08	-1.35413	down	9.43697e-05	-1.12623	down	0.0156899	-0.641347	normal	0.599132	-0.327134	normal
Panicum_miliaceum_newGene_2012	0.0314637	-0.529797	normal	0.00638149	-0.656666	down	0.325922	-0.272552	normal	0.917108	0.0366818	normal	0.973993	-0.0202904	normal
Panicum_miliaceum_newGene_2014	0.2599	-0.221377	normal	0.0150117	-0.453459	normal	0.00461132	-0.530063	normal	1.63979e-05	-0.846854	down	0.338948	-0.274606	normal
Panicum_miliaceum_newGene_2019	0.00697998	-1.4306	down	0.000144141	-2.38891	down	0.00121058	-2.61191	down	0.000467109	-1.93067	down	0.141543	-0.896126	normal
Panicum_miliaceum_newGene_2040	0.0197414	-0.614605	normal	0.00132394	-0.891079	down	0.000473954	-1.06476	down	1.90699e-05	-1.2266	down	0.86262	-0.077262	normal
Panicum_miliaceum_newGene_2050	0.0215763	-0.652114	normal	0.00643772	-0.894908	down	0.0279099	-0.609005	normal	0.665841	-0.15	normal	0.76922	0.147802	normal
Panicum_miliaceum_newGene_2070	0.657652	-0.266541	normal	0.138153	-0.874855	normal	0.0031186	-1.80995	down	0.15765	-1.15137	normal	0.311869	0.597096	normal
Panicum_miliaceum_newGene_2076	6.40275e-09	0.998093	up	0.0166555	0.711476	normal	0.200987	0.471179	normal	0.0103652	0.611335	normal	0.00614963	-0.79053	down
Panicum_miliaceum_newGene_209	0.000238048	-1.56702	down	0.0040882	-1.48644	down	0.114774	-0.776317	normal	0.805594	-0.143681	normal	0.505441	-0.519058	normal
Panicum_miliaceum_newGene_2140	4.65242e-06	-1.20651	down	1.59933e-06	-1.33967	down	5.96378e-08	-1.46575	down	5.87576e-10	-2.00482	down	0.848132	-0.0950449	normal
Panicum_miliaceum_newGene_2153	0.244457	-0.363198	normal	0.000498166	-0.893422	down	0.0046035	-1.09021	down	5.65987e-13	-2.27146	down	0.374893	-0.402738	normal
Panicum_miliaceum_newGene_2155	0.172815	0.314042	normal	0.260572	0.273395	normal	0.201512	0.352952	normal	0.0410366	-0.663072	normal	0.00768771	-0.676034	down
Panicum_miliaceum_newGene_2162	0.000119006	-2.92972	down	7.60016e-07	-4.73673	down	4.17178e-07	-3.93638	down	1.83919e-06	-4.69386	down	0.060865	-3.49438	normal
Panicum_miliaceum_newGene_2165	0.0168523	-1.42686	normal	0.0316948	-2.13382	normal	0.06157	-1.55874	normal	1.21801e-05	-3.71157	down	5.49489e-06	-4.71878	down
Panicum_miliaceum_newGene_2182	0.000632793	-1.55365	down	0.000149073	-2.12204	down	0.000709291	-1.72781	down	0.000463576	-1.59228	down	0.827452	-0.15083	normal
Panicum_miliaceum_newGene_2211	0.000344042	-1.31231	down	0.000291523	-1.30233	down	0.0709436	-0.649322	normal	0.0521616	-0.558788	normal	0.423773	-0.331177	normal
Panicum_miliaceum_newGene_2221	0.0295818	-1.09682	normal	0.00149703	-1.43129	down	3.10373e-05	-2.24372	down	0.00180751	-1.47658	down	0.614503	-0.306825	normal
Panicum_miliaceum_newGene_2234	0.0323538	-0.877776	normal	1.94447e-07	-2.61054	down	0.0990736	-1.01338	normal	0.000206088	-1.57657	down	0.79555	-0.129757	normal
Panicum_miliaceum_newGene_2235	0.27078	-0.322527	normal	0.336361	-0.328736	normal	0.178552	-0.381995	normal	2.89135e-05	-1.38503	down	0.811691	0.113285	normal
Panicum_miliaceum_newGene_2243	0.687922	-0.0875127	normal	0.00069596	-0.649805	down	0.196827	-0.270028	normal	0.52832	-0.126693	normal	0.424829	0.243477	normal
Panicum_miliaceum_newGene_2268	0.0405956	-0.450882	normal	0.000156369	-0.882594	down	0.0701208	-0.473175	normal	7.04606e-05	-1.1107	down	0.578502	-0.250946	normal
Panicum_miliaceum_newGene_2281	0.000383007	-1.79288	down	0.000584667	-2.72772	down	0.000209912	-2.12638	down	0.00507748	-1.69901	down	0.814474	0.239196	normal
Panicum_miliaceum_newGene_2289	0.000279004	-0.667641	down	2.92781e-09	-1.29548	down	3.90853e-13	-1.55834	down	4.04375e-07	-1.14814	down	0.13552	-0.410933	normal
Panicum_miliaceum_newGene_2321	0.0039522	-0.821411	down	0.00316199	-0.895146	down	0.159115	-0.405739	normal	0.504831	-0.2045	normal	0.599097	-0.238831	normal
Panicum_miliaceum_newGene_2336	0.000254707	-0.560849	normal	8.6679e-08	-0.935263	down	0.000466438	-0.830307	down	0.000803267	-0.76164	down	0.0418511	-0.492138	normal
Panicum_miliaceum_newGene_2347	0.96171	0.0157893	normal	0.660152	-0.126636	normal	0.407784	-0.194031	normal	1.7693e-05	-1.09905	down	0.00047071	-0.906303	down
Panicum_miliaceum_newGene_2364	0.418664	-0.512211	normal	0.0614523	-1.24067	normal	0.000146952	-2.27241	down	0.120186	-0.900487	normal	0.969973	-0.0427543	normal
Panicum_miliaceum_newGene_2375	0.19015	-0.487728	normal	0.963533	-0.0341787	normal	0.328462	-0.329434	normal	0.0674769	-0.587492	normal	5.21604e-07	-2.12072	down
Panicum_miliaceum_newGene_2377	0.00591694	0.787076	up	0.00310631	0.906235	up	0.91398	0.048059	normal	0.00292286	-1.15858	down	0.147266	0.922037	normal
Panicum_miliaceum_newGene_2383	0.00143538	-1.37446	down	0.00197605	-1.90098	down	0.0375513	-0.996163	normal	0.00372141	-1.36082	down	0.529844	0.349554	normal
Panicum_miliaceum_newGene_2408	0.165217	-0.423028	normal	0.000152802	-1.12643	down	6.14908e-06	-1.21019	down	2.1875e-11	-2.16343	down	0.591555	0.262416	normal
Panicum_miliaceum_newGene_2416	0.000647293	0.688238	up	0.000514518	0.651949	up	9.29583e-06	0.871177	up	0.725217	0.0979611	normal	1.03054e-08	-1.83689	down
Panicum_miliaceum_newGene_2431	4.21123e-09	1.09974	up	1.13609e-06	0.803883	up	0.537941	0.125999	normal	0.140721	0.27136	normal	1.85845e-14	-2.93898	down
Panicum_miliaceum_newGene_2443	0.512146	-0.16983	normal	0.0743512	-0.497544	normal	0.00166644	-0.742681	down	8.03033e-06	-1.02713	down	0.770605	0.105711	normal
Panicum_miliaceum_newGene_2472	0.000634615	-1.3278	down	0.000944569	-2.9492	down	0.000526636	-1.64018	down	0.000153621	-1.67036	down	0.105454	-0.821968	normal
Panicum_miliaceum_newGene_2481	0.831694	-0.0741885	normal	0.00747696	-0.640362	down	0.0509568	-0.55963	normal	0.0139641	-0.605901	normal	0.517898	0.25677	normal
Panicum_miliaceum_newGene_2526	0.595455	-1.32228	normal	8.25309e-08	-1.42442	down	1.27125e-05	-1.40963	down	9.34326e-08	-1.65585	down	0.582222	-1.09305	normal
Panicum_miliaceum_newGene_2539	0.0493972	-0.408256	normal	0.00142513	-0.736215	down	0.0212142	-0.660552	normal	0.00412788	-0.638795	down	0.749667	-0.112475	normal
Panicum_miliaceum_newGene_2542	0.000538433	-1.14654	down	5.08568e-15	-1.86145	down	1.60202e-18	-2.16256	down	1.53906e-07	-1.2298	down	0.917891	-0.0463053	normal
Panicum_miliaceum_newGene_2546	0.583601	-0.180766	normal	0.117886	-0.469695	normal	0.00248505	-0.938697	down	0.00132424	-0.850058	down	0.464935	0.288817	normal
Panicum_miliaceum_newGene_2570	0.0250918	-0.570654	normal	0.00659764	-0.75371	down	0.0589759	-0.550512	normal	0.0791331	-0.421138	normal	0.801859	0.10565	normal
Panicum_miliaceum_newGene_2574	0.000245715	-1.92968	down	3.75166e-07	-2.23631	down	0.0974778	-0.578909	normal	0.494845	0.29505	normal	0.144725	0.665287	normal
Panicum_miliaceum_newGene_2597	0.11278	-1.74873	normal	0.101717	-1.66252	normal	1.04723e-05	-4.27672	down	9.27379e-08	-7.45526	down	0.213647	-1.30299	normal
Panicum_miliaceum_newGene_2612	0.750138	-0.117503	normal	0.613868	-0.158884	normal	0.000129955	-1.15576	down	2.89845e-08	-1.77092	down	0.952686	0.174415	normal
Panicum_miliaceum_newGene_2614	0.113366	-0.963434	normal	0.00257351	-1.76894	down	0.0195688	-1.59128	normal	0.809942	-0.207168	normal	0.194375	1.25883	normal
Panicum_miliaceum_newGene_2642	0.362565	-0.475549	normal	0.0109133	-1.34778	normal	0.0295518	-1.10227	normal	4.30837e-08	-2.74593	down	0.00230976	1.55663	up
Panicum_miliaceum_newGene_2659	0.0299634	-0.460166	normal	1.1781e-07	-1.06146	down	1.39293e-07	-1.263	down	3.83165e-13	-1.39099	down	0.929414	0.0248075	normal
Panicum_miliaceum_newGene_2667	0.754466	-0.199066	normal	0.60803	0.276217	normal	0.14358	0.659433	normal	0.0184417	1.02506	normal	0.00924066	-1.81813	down
Panicum_miliaceum_newGene_2690	0.041384	-0.909517	normal	0.00976119	-0.938875	down	0.00282793	-1.16209	down	0.110648	-0.580866	normal	0.00529316	-1.3815	down
Panicum_miliaceum_newGene_2695	0.381697	-0.262946	normal	0.00940769	-0.840794	down	0.00275522	-0.865486	down	8.0852e-09	-1.94074	down	0.316031	0.45479	normal
Panicum_miliaceum_newGene_2699	1.09996e-05	-1.45666	down	0.0146589	-1.69148	normal	0.0760929	-0.969443	normal	0.0169447	-0.852765	normal	0.240735	0.508085	normal
Panicum_miliaceum_newGene_2713	0.78434	-0.0891885	normal	0.0207179	-0.547382	normal	9.92189e-05	-1.07537	down	7.49869e-06	-1.14955	down	0.360973	-0.314136	normal
Panicum_miliaceum_newGene_273	0.178663	-0.720676	normal	0.22973	-0.769773	normal	0.371617	-0.482612	normal	0.00718855	-1.74662	down	0.801616	-0.285004	normal
Panicum_miliaceum_newGene_2730	0.000193268	-1.27079	down	5.75189e-07	-2.12549	down	1.39874e-06	-2.12063	down	1.24213e-06	-1.92731	down	0.858108	0.10789	normal
Panicum_miliaceum_newGene_2738	2.31275e-05	-2.36636	down	0.00155556	-2.73223	down	7.28102e-06	-3.49195	down	5.0219e-07	-3.08383	down	0.508942	-0.448071	normal
Panicum_miliaceum_newGene_2739	1.52673e-05	-1.10783	down	3.34669e-08	-1.36741	down	0.250116	-0.475029	normal	5.44422e-07	-1.65314	down	0.856966	0.0855817	normal
Panicum_miliaceum_newGene_2749	0.115956	-0.399198	normal	0.00677586	-0.619268	down	0.000876202	-0.78682	down	0.000219421	-1.0793	down	0.182813	0.56684	normal
Panicum_miliaceum_newGene_2750	9.48118e-05	1.27494	up	4.87061e-10	1.87507	up	1.00405e-08	1.72327	up	0.0154308	0.822918	normal	0.00434744	-1.86572	down
Panicum_miliaceum_newGene_2761	0.400728	-0.488201	normal	0.123687	-1.26064	normal	0.013969	-1.41311	normal	0.00651762	-1.66142	down	0.104057	-1.13941	normal
Panicum_miliaceum_newGene_2766	0.308707	-0.268435	normal	0.0219537	-0.608816	normal	1.626e-07	-1.18359	down	2.31348e-22	-2.195	down	0.00150079	-0.852252	down
Panicum_miliaceum_newGene_2818	0.00253304	-1.14311	down	0.00114142	-1.24367	down	0.0254342	-0.856017	normal	0.00263785	-1.28288	down	0.700914	-0.187304	normal
Panicum_miliaceum_newGene_2826	0.094472	-0.775235	normal	0.281636	-0.594731	normal	0.0022317	-1.59266	down	0.374292	-0.421976	normal	0.575905	0.3222	normal
Panicum_miliaceum_newGene_2841	0.00106044	-0.848759	down	6.61387e-12	-1.74863	down	1.13114e-26	-2.54919	down	2.24314e-34	-3.0637	down	0.258455	0.320042	normal
Panicum_miliaceum_newGene_2845	0.000129749	-0.951743	down	3.67608e-09	-1.65667	down	6.67031e-09	-1.55198	down	3.49188e-05	-1.0809	down	0.094019	0.611214	normal
Panicum_miliaceum_newGene_2873	0.0429246	-0.310187	normal	0.0977753	-0.266893	normal	0.0106902	-0.428254	normal	0.00106684	-0.58802	down	0.717121	0.125913	normal
Panicum_miliaceum_newGene_288	0.0571308	-0.868946	normal	0.00322812	-1.49097	down	0.000790534	-1.72766	down	0.000860241	-1.78781	down	0.309851	-0.664737	normal
Panicum_miliaceum_newGene_2880	0.126475	-0.533825	normal	5.09103e-06	-1.27329	down	3.01712e-09	-2.37799	down	1.64506e-06	-1.84429	down	0.841	0.0781944	normal
[truncated: 10,251 more rows]
