# Supplementary material for: Genome-wide identification and drought-responsive root expression profiling of the VQ gene family in proso millet ( Panicum miliaceum L.)
Source: PeerJ journal article supplement (doi:10.7717/peerj.20792), 2026-02-10
Supplement: TableS1.xlsx [file TableS1.xlsx]

## Sheet: Sheet1
Unified Number	Full Name	Abbreviation	Chinese Name	Collection Location	Collection Time
00001616	Niuluandanhongmi	NLD	牛卵蛋红糜	Yulin, Shaanxi (China)	2018.9
null	Shaanmi-3	SM3	陕糜3号	Yulin, Shaanxi (China)	2018.9
00002778	Banlianhong	BLH	皋兰半脸红	Gansu (China)	2018.9
null	Longmi-14	LM14	陇糜14号	Gansu (China)	2018.9
null	Yimi-13	YM13	伊糜13号	Ordos, Inner Mongolia(China)	2018.9
null	Longmi-4	LM4	陇糜4号	Gansu (China)	2018.9
00005256	Xiaotoumi	XTM	枭头糜	Yulin, Shaanxi (China)	2018.9
00002409	Zhunqiziganhongmi	ZQ	准旗紫秆红糜	Ordos, Inner Mongolia(China)	2018.9
00000149	Xiaomaimizi	XM	小麦糜子	Heilongjiang (China)	2018.9
00002160	Helinhongmizi	HLH	和林红糜子	Ulanqab, Inner Mongolia (China)	2018.9
null	Yushu-1	YS1	榆黍1号	Yulin, Shaanxi (China)	2018.9
00007478	Baigetami	BGT	白圪塔糜	Xining, Qinghai	2018.9
