# Supplementary material for: Genome-wide identification and drought-responsive root expression profiling of the VQ gene family in proso millet ( Panicum miliaceum L.)
Source: PeerJ journal article supplement (doi:10.7717/peerj.20792), 2026-02-10
Supplement: TableS3.xlsx [file TableS3.xlsx]

## Sheet: Sheet1
	Gene ID	Size(aa)	PI	MW(kDa)	Instability Index	Subcellular Localization Prediction
	PmVQ18	153	11.64	16.04	66.9	chloroplast and nuclear
	PmVQ23	175	8.93	17.57	51.04	nuclear
	PmVQ20	331	11.72	34.83	95.53	chloroplas
	PmVQ3	325	11.59	34.05	98.21	chloroplast
	PmVQ6	346	10.15	35.76	71.52	chloroplast
	PmVQ8	238	10.94	24.33	104.04	chloroplast
	PmVQ12	261	10.17	27.64	63.23	chloroplast
	PmVQ22	192	9.1	19.72	65.61	chloroplast
	PmVQ24	252	10.94	25.65	103.6	chloroplast
	PmVQ28	175	4.77	18.26	53.62	chloroplast
	PmVQ35	184	4.98	19.74	58.77	chloroplast
	PmVQ38	305	10.37	32.15	79.24	chloroplast
	PmVQ45	85	8.09	8.99	45.19	chloroplast
	PmVQ50	170	9.68	17.45	66.24	chloroplast
	PmVQ66	178	5.14	19.2	57.91	chloroplast
	PmVQ15	241	10.46	24.9	72.64	chloroplast and mitochondrial
	PmVQ4	245	8.55	24.72	66.92	chloroplast and nuclear
	PmVQ62	196	9.8	20.71	70.72	chloroplast and nuclear
	PmVQ39	134	8.7	14.58	58.16	E.R. and chloroplast
	PmVQ53	148	10.15	15.25	72.25	extracellular
	PmVQ31	123	5.49	12.54	43.72	mitochondrial
	PmVQ32	137	7.74	14.28	59.14	mitochondrial
	PmVQ37	186	5.71	19.14	55.28	mitochondrial
	PmVQ46	237	10.93	24.51	69.93	mitochondrial
	PmVQ52	117	5.48	11.86	43.2	mitochondrial
	PmVQ64	142	7.01	15.11	60.46	mitochondrial
	PmVQ17	146	9.89	15.22	76.11	mitochondrial and nuclear
	PmVQ25	199	9.46	20.28	71.01	mitochondrial and nuclear
	PmVQ41	194	9.46	19.86	72.41	mitochondrial and nuclear
	PmVQ61	158	5.36	16.72	62.05	mitochondrial and nuclear
	PmVQ1	125	10.43	12.79	59.02	nuclear
	PmVQ2	124	6.57	12.83	53.96	nuclear
	PmVQ5	277	7.25	28.22	72.74	nuclear
	PmVQ7	173	9.19	17.43	40.87	nuclear
	PmVQ10	213	6.75	22.09	62.98	nuclear
	PmVQ11	447	6.4	43.58	68.32	nuclear
	PmVQ13	212	8.86	21.67	59.8	nuclear
	PmVQ16	165	6.89	16.4	43.42	nuclear
	PmVQ19	126	7.79	13.14	56.49	nuclear
	PmVQ21	278	7.3	28.27	70.98	nuclear
	PmVQ26	243	7.92	24.63	66	nuclear
	PmVQ27	234	9.9	24.64	77.83	nuclear
	PmVQ29	165	9.44	16.99	72.26	nuclear
	PmVQ30	285	7.97	29.99	77.77	nuclear
	PmVQ33	229	10.08	22.93	62.41	nuclear
	PmVQ34	216	10.5	21.91	52.17	nuclear
	PmVQ36	229	7.14	23.36	65.91	nuclear
	PmVQ40	318	11.49	34.89	80.19	nuclear
	PmVQ42	383	7.2	38.01	59.26	nuclear
	PmVQ43	276	9.22	28.73	86.97	nuclear
	PmVQ44	192	9.43	19.87	64.55	nuclear
	PmVQ47	169	5.89	16.99	40.06	nuclear
	PmVQ48	187	6.12	19.48	60.46	nuclear
	PmVQ49	269	6.05	28.3	57.79	nuclear
	PmVQ51	230	9.85	23.1	56.67	nuclear
	PmVQ54	195	8.96	19.91	71.84	nuclear
	PmVQ55	205	7.12	21.01	59.14	nuclear
	PmVQ56	154	10.67	16.62	76.36	nuclear
	PmVQ57	155	5.52	16.46	65.05	nuclear
	PmVQ58	211	9.58	22.48	94.79	nuclear
	PmVQ59	330	6.71	34.3	80.38	nuclear
	PmVQ60	210	9.69	22.39	93.87	nuclear
	PmVQ63	280	9.84	29.66	47.56	nuclear
	PmVQ65	214	10.5	21.77	51.03	nuclear
	PmVQ67	223	8.21	22.92	61.38	nuclear
	PmVQ68	194	9.35	20.06	60.95	nuclear
	PmVQ9	179	9.5	18.73	78.82	nuclear and chloroplast
	PmVQ14	87	5.84	9.11	55.02	nuclear and chloroplast
	PmVQ69	234	4.11	24.41	41.15	nuclear and chloroplast
	PmVQ70	365	8.31	36.46	61.69	nuclear and mitochondrial
	aa,amino acid;MW,molecular weight;Da,Dalton;PI, isoelectric point
