# Supplementary material for: Genome-wide identification and drought-responsive root expression profiling of the VQ gene family in proso millet ( Panicum miliaceum L.)
Source: PeerJ journal article supplement (doi:10.7717/peerj.20792), 2026-02-10
Supplement: TableS4.xlsx [file TableS4.xlsx]

## Sheet: Sheet1
Seq_1	Seq_2	Ka	Ks	Ka_Ks	EffectiveLen	AverageS-sites	AverageN-sites	cN	cS	pN	pS	Note
LM01CHG001237	LM04CHG001166	0.0285555	0.0922466	0.309556	342	92.1667	249.833	7	8	0.0280187	0.0867993
LM01CHG002788	LM04CHG002612	0.0699464	0.101206	0.69113	369	84.5	284.5	19	8	0.0667838	0.0946746
LM01CHG002830	LM04CHG002660	0.0126853	0.0954986	0.132832	972	256.5	715.5	9	23	0.0125786	0.0896686
LM01CHG003460	LM02CHG000415	0.371456	0.634937	0.585029	570	155.25	414.75	121.5	66.5	0.292948	0.428341
LM01CHG003460	LM04CHG003262	0.011688	0.0809989	0.144298	825	221.417	603.583	7	17	0.0115974	0.0767783
LM01CHG003820	LM02CHG000044	0.396432	0.604845	0.655428	510	139.5	370.5	114.083	57.9167	0.307917	0.415173
LM01CHG003820	LM03CHG000128	0.672893	1.03281	0.651518	507	144	363	161.25	80.75	0.444215	0.560764
LM01CHG003820	LM04CHG003604	0.0402275	0.0798094	0.504044	567	158.5	408.5	16	12	0.0391677	0.0757098
LM01CHG003820	LM10CHG000070	0.63249	0.96938	0.652469	480	136.167	343.833	146.917	74.0833	0.42729	0.544064
LM01CHG003820	LM11CHG000044	0.385271	0.578212	0.666313	528	146.583	381.417	114.917	59.0833	0.301289	0.40307
LM01CHG003820	LM17CHG000112	0.756921	0.999466	0.757325	510	144.583	365.417	174.167	79.8333	0.476625	0.552161
LM01CHG003831	LM04CHG003611	0.0326879	0.120418	0.271453	510	134.833	375.167	12	15	0.0319858	0.111248
LM01CHG003831	LM08CHG001003	0.579092	0.596766	0.970383	429	112.583	316.417	127.667	46.3333	0.403476	0.411547
LM01CHG004590	LM04CHG004350	0.0118893	0.03489	0.340765	714	205.333	508.667	6	7	0.0117955	0.0340909
LM02CHG000044	LM04CHG003604	0.444541	0.629276	0.706433	522	142.833	379.167	127.167	60.8333	0.335385	0.425904
Seq_1	Seq_2	Ka	Ks	Ka_Ks	EffectiveLen	AverageS-sites	AverageN-sites	cN	cS	pN	pS	Note
LM02CHG000044	LM11CHG000044	0.0587629	0.0510359	1.1514	513	138.5	374.5	21.1667	6.83333	0.0565198	0.0493381
LM02CHG000415	LM04CHG003262	0.34028	0.784687	0.43365	558	151.917	406.083	111.083	73.9167	0.273548	0.486561
LM02CHG002290	LM09CHG001062	0.405882	0.532357	0.762425	1047	292.5	754.5	236.5	111.5	0.313453	0.381197
LM02CHG002290	LM18CHG000947	0.388924	0.509166	0.763845	1053	294	759	230.333	108.667	0.303469	0.369615
LM02CHG003718	LM04CHG000504	0.403409	0.512791	0.786694	429	120.25	308.75	96.3333	44.6667	0.312011	0.371448
LM02CHG003718	LM11CHG003363	0.0727667	0.161697	0.450018	498	137.5	360.5	25	20	0.0693481	0.145455
LM03CHG000128	LM04CHG003604	0.680699	1.21651	0.55955	477	133.333	343.667	153.75	80.25	0.447381	0.601875
LM03CHG000128	LM10CHG000070	0.0544642	0.122254	0.445501	561	158.083	402.917	21.1667	17.8333	0.0525336	0.11281
LM03CHG000128	LM13CHG001752	0.0327474	0.0759742	0.431032	603	166.083	436.917	14	12	0.0320427	0.0722529
LM03CHG000128	LM17CHG000112	0.0571009	0.129961	0.43937	561	157.833	403.167	22.1667	18.8333	0.0549814	0.119324
LM03CHG001809	LM05CHG002915	0.247915	0.50136	0.494485	693	185.75	507.25	107.083	67.9167	0.211106	0.365635
LM03CHG001809	LM08CHG001354	0.233202	0.431473	0.540479	690	185.667	504.333	101.083	60.9167	0.20043	0.328097
LM03CHG001809	LM10CHG001729	0.00783041	0.0711563	0.110045	705	191.5	513.5	4	13	0.00778968	0.0678851
LM03CHG002004	LM05CHG003286	0.375853	0.557112	0.674646	327	85.4167	241.583	71.4167	33.5833	0.295619	0.393171
Seq_1	Seq_2	Ka	Ks	Ka_Ks	EffectiveLen	AverageS-sites	AverageN-sites	cN	cS	pN	pS	Note
LM03CHG002004	LM08CHG001003	0.461939	0.584606	0.790171	480	121.917	358.083	123.5	49.5	0.344892	0.406015
LM03CHG002004	LM10CHG001921	0.0250429	0.066022	0.379312	492	126.583	365.417	9	8	0.0246294	0.0631995
LM04CHG000504	LM11CHG003363	0.406766	0.536617	0.758019	414	115.667	298.333	93.6667	44.3333	0.313966	0.383285
LM04CHG003604	LM10CHG000070	0.545713	0.978348	0.55779	435	121.833	313.167	121.417	66.5833	0.387706	0.546512
LM04CHG003604	LM11CHG000044	0.36346	0.571088	0.636435	495	138	357	102.833	55.1667	0.288049	0.399758
LM04CHG003604	LM17CHG000112	0.516784	0.956362	0.540364	393	109.167	283.833	106	59	0.373459	0.540458
LM04CHG003611	LM08CHG001003	0.49731	0.779021	0.638379	372	97.1667	274.833	99.9167	47.0833	0.363554	0.484563
LM05CHG000263	LM08CHG003760	0.0119239	0.107809	0.110603	582	159.333	422.667	5	16	0.0118297	0.100418
LM05CHG002915	LM08CHG001354	0.00975306	0.0557878	0.174824	702	186	516	5	10	0.00968992	0.0537634
LM05CHG002915	LM10CHG001729	0.21702	0.518935	0.418203	666	180	486	91.5833	67.4167	0.188443	0.374537
LM05CHG003286	LM08CHG001003	0.0170559	0.0307735	0.554238	396	99.5	296.5	5	3	0.0168634	0.0301508
LM05CHG003286	LM10CHG001921	0.399399	0.383435	1.04164	345	88	257	79.5833	26.4167	0.309663	0.300189
LM06CHG001748	LM15CHG000825	0.401436	0.577535	0.695085	801	217.667	583.333	181.333	87.6667	0.310857	0.402757
LM06CHG002717	LM12CHG000876	0.0611336	0.176245	0.346867	351	95.5	255.5	15	15	0.0587084	0.157068
Seq_1	Seq_2	Ka	Ks	Ka_Ks	EffectiveLen	AverageS-sites	AverageN-sites	cN	cS	pN	pS	Note
LM06CHG002717	LM16CHG001478	0.519185	0.501741	1.03477	333	86.3333	246.667	92.4167	31.5833	0.374662	0.36583
LM06CHG003065	LM12CHG000434	0.0227212	0.0731601	0.310568	678	186.5	491.5	11	13	0.0223805	0.0697051
LM07CHG001929	LM16CHG001749	0.0198468	0.0739059	0.268542	630	170.5	459.5	9	12	0.0195865	0.0703812
LM07CHG002011	LM16CHG001824	0.0423189	0.167358	0.252865	531	130	401	16.5	19.5	0.0411471	0.15
LM07CHG002263	LM16CHG002056	0.0352092	0.0657464	0.535531	669	174.75	494.25	17	11	0.0343955	0.0629471
LM08CHG001003	LM10CHG001921	0.447067	0.394738	1.13257	495	124.083	370.917	124.917	38.0833	0.336778	0.306917
LM08CHG001354	LM10CHG001729	0.21698	0.48247	0.449728	672	181.5	490.5	92.4167	64.5833	0.188413	0.355831
LM09CHG001062	LM18CHG000947	0.05981	0.0827576	0.722714	1074	299.917	774.083	44.5	23.5	0.0574874	0.0783551
LM09CHG002345	LM14CHG000060	0.468472	0.971883	0.482025	450	118.25	331.75	115.583	64.4167	0.348405	0.54475
LM09CHG002345	LM15CHG002603	0.524351	1.00429	0.522109	567	148.167	418.833	158	82	0.377238	0.553431
LM10CHG000070	LM13CHG001752	0.0667012	0.135492	0.492288	570	160	410	26.1667	19.8333	0.0638211	0.123958
LM10CHG000070	LM17CHG000112	0.019629	0.00615704	3.18806	576	163.083	412.917	8	1	0.0193744	0.00613183
LM12CHG000876	LM16CHG001478	0.397609	0.434372	0.915366	315	84.6667	230.333	71.0833	27.9167	0.308611	0.329724
LM13CHG001752	LM17CHG000112	0.0667153	0.142935	0.466752	570	160.083	409.917	26.1667	20.8333	0.0638341	0.130141
LM14CHG000060	LM15CHG002603	0.0998148	0.054648	1.8265	459	120.167	338.833	31.6667	6.33333	0.0934579	0.0527046
LM14CHG000212	LM15CHG002445	0.0115721	0.036043	0.321063	462	113.667	348.333	4	4	0.0114833	0.0351906
LM14CHG000340	LM15CHG002318	0.022419	0.0735658	0.304748	624	171.25	452.75	10	12	0.0220872	0.070073
