# Supplementary material for: Genome-wide identification and drought-responsive root expression profiling of the VQ gene family in proso millet ( Panicum miliaceum L.)
Source: PeerJ journal article supplement (doi:10.7717/peerj.20792), 2026-02-10
Supplement: TableS5.xlsx [file TableS5.xlsx]

## Sheet: At and Pm
1	transcript:AT1G78310.1	==	GWHAAEZ00000001.1	LM01CHG004590.mRNA1
1	transcript:AT1G78310.1	==	GWHAAEZ00000004.1	LM04CHG004350.mRNA1
3	transcript:AT3G58000.1	==	GWHAAEZ00000016.1	LM16CHG001824.mRNA1
4	transcript:AT4G39720.2	==	GWHAAEZ00000002.1	LM02CHG000415.mRNA1

## Sheet: Os and Pm
11	transcript:Os11t0131100-00	==	GWHAAEZ00000001.1	LM01CHG003820.mRNA1
11	transcript:Os11t0131100-00	==	GWHAAEZ00000003.1	LM03CHG000128.mRNA1
11	transcript:Os11t0131100-00	==	GWHAAEZ00000004.1	LM04CHG003604.mRNA1
11	transcript:Os11t0131100-00	==	GWHAAEZ00000010.1	LM10CHG000070.mRNA1
11	transcript:Os11t0131100-00	==	GWHAAEZ00000013.1	LM13CHG001752.mRNA1
11	transcript:Os11t0131100-00	==	GWHAAEZ00000017.1	LM17CHG000112.mRNA1
1	transcript:Os01t0808900-01	==	GWHAAEZ00000001.1	LM01CHG003831.mRNA1
1	transcript:Os01t0653300-00	==	GWHAAEZ00000003.1	LM03CHG001465.mRNA1
1	transcript:Os01t0747800-01	==	GWHAAEZ00000003.1	LM03CHG001809.mRNA1
1	transcript:Os01t0808900-01	==	GWHAAEZ00000003.1	LM03CHG002004.mRNA1
1	transcript:Os01t0808900-01	==	GWHAAEZ00000004.1	LM04CHG003611.mRNA1
1	transcript:Os01t0747800-01	==	GWHAAEZ00000005.1	LM05CHG002915.mRNA1
1	transcript:Os01t0808900-01	==	GWHAAEZ00000005.1	LM05CHG003286.mRNA1
1	transcript:Os01t0278000-01	==	GWHAAEZ00000005.1	LM05CHG001152.mRNA1
1	transcript:Os01t0201250-00	==	GWHAAEZ00000005.1	LM05CHG000263.mRNA1
1	transcript:Os01t0201250-00	==	GWHAAEZ00000008.1	LM08CHG003760.mRNA1
1	transcript:Os01t0747800-01	==	GWHAAEZ00000008.1	LM08CHG001354.mRNA1
1	transcript:Os01t0808900-01	==	GWHAAEZ00000008.1	LM08CHG001003.mRNA1
1	transcript:Os01t0653300-00	==	GWHAAEZ00000008.1	LM08CHG001878.mRNA1
1	transcript:Os01t0278000-01	==	GWHAAEZ00000008.1	LM08CHG002937.mRNA1
1	transcript:Os01t0808900-01	==	GWHAAEZ00000010.1	LM10CHG001921.mRNA1
1	transcript:Os01t0653300-00	==	GWHAAEZ00000010.1	LM10CHG001417.mRNA1
1	transcript:Os01t0747800-01	==	GWHAAEZ00000010.1	LM10CHG001729.mRNA1
12	transcript:Os12t0127800-01	==	GWHAAEZ00000001.1	LM01CHG003820.mRNA1
12	transcript:Os12t0635400-01	==	GWHAAEZ00000001.1	LM01CHG001237.mRNA1
12	transcript:Os12t0127800-01	==	GWHAAEZ00000003.1	LM03CHG000128.mRNA1
12	transcript:Os12t0127800-01	==	GWHAAEZ00000004.1	LM04CHG003604.mRNA1
12	transcript:Os12t0635400-01	==	GWHAAEZ00000004.1	LM04CHG001166.mRNA1
12	transcript:Os12t0127800-01	==	GWHAAEZ00000010.1	LM10CHG000070.mRNA1
12	transcript:Os12t0127800-01	==	GWHAAEZ00000013.1	LM13CHG001752.mRNA1
12	transcript:Os12t0127800-01	==	GWHAAEZ00000017.1	LM17CHG000112.mRNA1
2	transcript:Os02t0251800-00	==	GWHAAEZ00000006.1	LM06CHG002717.mRNA1
2	transcript:Os02t0539500-01	==	GWHAAEZ00000006.1	LM06CHG001748.mRNA1
2	transcript:Os02t0173200-01	==	GWHAAEZ00000006.1	LM06CHG003065.mRNA1
2	transcript:Os02t0173200-01	==	GWHAAEZ00000012.1	LM12CHG000434.mRNA1
2	transcript:Os02t0251800-00	==	GWHAAEZ00000012.1	LM12CHG000876.mRNA1
2	transcript:Os02t0753700-01	==	GWHAAEZ00000012.1	LM12CHG002715.mRNA1
2	transcript:Os02t0539500-01	==	GWHAAEZ00000015.1	LM15CHG000825.mRNA1
2	transcript:Os02t0251800-00	==	GWHAAEZ00000016.1	LM16CHG001478.mRNA1
3	transcript:Os03t0676400-01	==	GWHAAEZ00000001.1	LM01CHG001237.mRNA1
3	transcript:Os03t0190000-01	==	GWHAAEZ00000001.1	LM01CHG004590.mRNA1
3	transcript:Os03t0320600-01	==	GWHAAEZ00000001.1	LM01CHG003820.mRNA1
3	transcript:Os03t0387300-01	==	GWHAAEZ00000001.1	LM01CHG003460.mRNA1
3	transcript:Os03t0387300-01	==	GWHAAEZ00000002.1	LM02CHG000415.mRNA1
3	transcript:Os03t0789100-01	==	GWHAAEZ00000002.1	LM02CHG003718.mRNA1
3	transcript:Os03t0320600-01	==	GWHAAEZ00000002.1	LM02CHG000044.mRNA1
3	transcript:Os03t0320600-01	==	GWHAAEZ00000003.1	LM03CHG000128.mRNA1
3	transcript:Os03t0676400-01	==	GWHAAEZ00000004.1	LM04CHG001166.mRNA1
3	transcript:Os03t0789100-01	==	GWHAAEZ00000004.1	LM04CHG000504.mRNA1
3	transcript:Os03t0320600-01	==	GWHAAEZ00000004.1	LM04CHG003604.mRNA1
3	transcript:Os03t0387300-01	==	GWHAAEZ00000004.1	LM04CHG003262.mRNA1
3	transcript:Os03t0190000-01	==	GWHAAEZ00000004.1	LM04CHG004350.mRNA1
3	transcript:Os03t0320600-01	==	GWHAAEZ00000010.1	LM10CHG000070.mRNA1
3	transcript:Os03t0387300-01	==	GWHAAEZ00000011.1	LM11CHG000385.mRNA1
3	transcript:Os03t0789100-01	==	GWHAAEZ00000011.1	LM11CHG003363.mRNA1
3	transcript:Os03t0320600-01	==	GWHAAEZ00000011.1	LM11CHG000044.mRNA1
3	transcript:Os03t0320600-01	==	GWHAAEZ00000017.1	LM17CHG000112.mRNA1
4	transcript:Os04t0417600-00	==	GWHAAEZ00000006.1	LM06CHG001748.mRNA1
4	transcript:Os04t0645200-01	==	GWHAAEZ00000014.1	LM14CHG000340.mRNA1
4	transcript:Os04t0665900-00	==	GWHAAEZ00000014.1	LM14CHG000212.mRNA1
4	transcript:Os04t0645200-01	==	GWHAAEZ00000015.1	LM15CHG002318.mRNA1
4	transcript:Os04t0665900-00	==	GWHAAEZ00000015.1	LM15CHG002445.mRNA1
4	transcript:Os04t0417600-00	==	GWHAAEZ00000015.1	LM15CHG000825.mRNA1
5	transcript:Os05t0491700-00	==	GWHAAEZ00000003.1	LM03CHG002004.mRNA1
5	transcript:Os05t0519000-00	==	GWHAAEZ00000003.1	LM03CHG001809.mRNA1
5	transcript:Os05t0491700-00	==	GWHAAEZ00000005.1	LM05CHG003286.mRNA1
5	transcript:Os05t0519000-00	==	GWHAAEZ00000005.1	LM05CHG002915.mRNA1
5	transcript:Os05t0491700-00	==	GWHAAEZ00000008.1	LM08CHG001003.mRNA1
5	transcript:Os05t0519000-00	==	GWHAAEZ00000008.1	LM08CHG001354.mRNA1
5	transcript:Os05t0491700-00	==	GWHAAEZ00000010.1	LM10CHG001921.mRNA1
5	transcript:Os05t0519000-00	==	GWHAAEZ00000010.1	LM10CHG001729.mRNA1
6	transcript:Os06t0530600-00	==	GWHAAEZ00000006.1	LM06CHG002717.mRNA1
6	transcript:Os06t0666400-01	==	GWHAAEZ00000007.1	LM07CHG002263.mRNA1
6	transcript:Os06t0603300-00	==	GWHAAEZ00000007.1	LM07CHG001929.mRNA1
6	transcript:Os06t0618700-01	==	GWHAAEZ00000007.1	LM07CHG002011.mRNA1
6	transcript:Os06t0530600-00	==	GWHAAEZ00000012.1	LM12CHG000876.mRNA1
6	transcript:Os06t0530600-00	==	GWHAAEZ00000016.1	LM16CHG001478.mRNA1
6	transcript:Os06t0603300-00	==	GWHAAEZ00000016.1	LM16CHG001749.mRNA1
6	transcript:Os06t0618700-01	==	GWHAAEZ00000016.1	LM16CHG001824.mRNA1
6	transcript:Os06t0666400-01	==	GWHAAEZ00000016.1	LM16CHG002056.mRNA1
7	transcript:Os07t0686600-01	==	GWHAAEZ00000001.1	LM01CHG003820.mRNA1
7	transcript:Os07t0687400-00	==	GWHAAEZ00000001.1	LM01CHG003831.mRNA1
7	transcript:Os07t0686600-01	==	GWHAAEZ00000002.1	LM02CHG000044.mRNA1
7	transcript:Os07t0687400-00	==	GWHAAEZ00000003.1	LM03CHG002004.mRNA1
7	transcript:Os07t0686600-01	==	GWHAAEZ00000004.1	LM04CHG003604.mRNA1
7	transcript:Os07t0687400-00	==	GWHAAEZ00000004.1	LM04CHG003611.mRNA1
7	transcript:Os07t0161700-00	==	GWHAAEZ00000004.1	LM04CHG000504.mRNA1
7	transcript:Os07t0687400-00	==	GWHAAEZ00000010.1	LM10CHG001921.mRNA1
7	transcript:Os07t0686600-01	==	GWHAAEZ00000011.1	LM11CHG000044.mRNA1
8	transcript:Os08t0409500-01	==	GWHAAEZ00000002.1	LM02CHG002290.mRNA1
8	transcript:Os08t0409500-01	==	GWHAAEZ00000009.1	LM09CHG001062.mRNA1
8	transcript:Os08t0102900-01	==	GWHAAEZ00000009.1	LM09CHG002345.mRNA1
8	transcript:Os08t0409500-01	==	GWHAAEZ00000018.1	LM18CHG000947.mRNA1
9	transcript:Os09t0370500-00	==	GWHAAEZ00000002.1	LM02CHG002290.mRNA1
9	transcript:Os09t0370500-00	==	GWHAAEZ00000009.1	LM09CHG001062.mRNA1
9	transcript:Os09t0370500-00	==	GWHAAEZ00000018.1	LM18CHG000947.mRNA1
10	transcript:Os10t0575401-00	==	GWHAAEZ00000001.1	LM01CHG002856.mRNA1
10	transcript:Os10t0577200-01	==	GWHAAEZ00000001.1	LM01CHG002830.mRNA1
10	transcript:Os10t0577200-01	==	GWHAAEZ00000004.1	LM04CHG002660.mRNA1

## Sheet: Zm and Pm
1	transcript:Zm00001eb052000_T001	==	GWHAAEZ00000001.1	LM01CHG001237.mRNA1
1	transcript:Zm00001eb024310_T002	==	GWHAAEZ00000001.1	LM01CHG002856.mRNA1
1	transcript:Zm00001eb032850_T001	==	GWHAAEZ00000001.1	LM01CHG001237.mRNA1
1	transcript:Zm00001eb015160_T001	==	GWHAAEZ00000001.1	LM01CHG003831.mRNA1
1	transcript:Zm00001eb015250_T001	==	GWHAAEZ00000001.1	LM01CHG003820.mRNA1
1	transcript:Zm00001eb025590_T001	==	GWHAAEZ00000001.1	LM01CHG002788.mRNA1
1	transcript:Zm00001eb015250_T001	==	GWHAAEZ00000002.1	LM02CHG000044.mRNA1
1	transcript:Zm00001eb060160_T001	==	GWHAAEZ00000002.1	LM02CHG003718.mRNA1
1	transcript:Zm00001eb015250_T001	==	GWHAAEZ00000003.1	LM03CHG000128.mRNA1
1	transcript:Zm00001eb052000_T001	==	GWHAAEZ00000004.1	LM04CHG001166.mRNA1
1	transcript:Zm00001eb032850_T001	==	GWHAAEZ00000004.1	LM04CHG001166.mRNA1
1	transcript:Zm00001eb015160_T001	==	GWHAAEZ00000004.1	LM04CHG003611.mRNA1
1	transcript:Zm00001eb015250_T001	==	GWHAAEZ00000004.1	LM04CHG003604.mRNA1
1	transcript:Zm00001eb060160_T001	==	GWHAAEZ00000004.1	LM04CHG000504.mRNA1
1	transcript:Zm00001eb025590_T001	==	GWHAAEZ00000004.1	LM04CHG002612.mRNA1
1	transcript:Zm00001eb015160_T001	==	GWHAAEZ00000008.1	LM08CHG001003.mRNA1
1	transcript:Zm00001eb015250_T001	==	GWHAAEZ00000010.1	LM10CHG000070.mRNA1
1	transcript:Zm00001eb060160_T001	==	GWHAAEZ00000011.1	LM11CHG003363.mRNA1
1	transcript:Zm00001eb015250_T001	==	GWHAAEZ00000011.1	LM11CHG000044.mRNA1
1	transcript:Zm00001eb015250_T001	==	GWHAAEZ00000017.1	LM17CHG000112.mRNA1
2	transcript:Zm00001eb117290_T001	==	GWHAAEZ00000002.1	LM02CHG003718.mRNA1
2	transcript:Zm00001eb111780_T001	==	GWHAAEZ00000002.1	LM02CHG000044.mRNA1
2	transcript:Zm00001eb098700_T001	==	GWHAAEZ00000002.1	LM02CHG002290.mRNA1
2	transcript:Zm00001eb093500_T001	==	GWHAAEZ00000003.1	LM03CHG000128.mRNA1
2	transcript:Zm00001eb117290_T001	==	GWHAAEZ00000004.1	LM04CHG000504.mRNA1
2	transcript:Zm00001eb083470_T001	==	GWHAAEZ00000006.1	LM06CHG001748.mRNA1
2	transcript:Zm00001eb098700_T001	==	GWHAAEZ00000009.1	LM09CHG001062.mRNA1
2	transcript:Zm00001eb093500_T001	==	GWHAAEZ00000010.1	LM10CHG000070.mRNA1
2	transcript:Zm00001eb117290_T001	==	GWHAAEZ00000011.1	LM11CHG003363.mRNA1
2	transcript:Zm00001eb111780_T001	==	GWHAAEZ00000011.1	LM11CHG000044.mRNA1
2	transcript:Zm00001eb093500_T001	==	GWHAAEZ00000013.1	LM13CHG001752.mRNA1
2	transcript:Zm00001eb067140_T001	==	GWHAAEZ00000014.1	LM14CHG000212.mRNA1
2	transcript:Zm00001eb068610_T001	==	GWHAAEZ00000014.1	LM14CHG000340.mRNA1
2	transcript:Zm00001eb067140_T001	==	GWHAAEZ00000015.1	LM15CHG002445.mRNA1
2	transcript:Zm00001eb068610_T001	==	GWHAAEZ00000015.1	LM15CHG002318.mRNA1
2	transcript:Zm00001eb083470_T001	==	GWHAAEZ00000015.1	LM15CHG000825.mRNA1
2	transcript:Zm00001eb093500_T001	==	GWHAAEZ00000017.1	LM17CHG000112.mRNA1
2	transcript:Zm00001eb098700_T001	==	GWHAAEZ00000018.1	LM18CHG000947.mRNA1
3	transcript:Zm00001eb153070_T001	==	GWHAAEZ00000003.1	LM03CHG001809.mRNA1
3	transcript:Zm00001eb158120_T001	==	GWHAAEZ00000003.1	LM03CHG001465.mRNA1
3	transcript:Zm00001eb128970_T001	==	GWHAAEZ00000005.1	LM05CHG001152.mRNA1
3	transcript:Zm00001eb153070_T001	==	GWHAAEZ00000005.1	LM05CHG002915.mRNA1
3	transcript:Zm00001eb120650_T001	==	GWHAAEZ00000005.1	LM05CHG000263.mRNA1
3	transcript:Zm00001eb158120_T001	==	GWHAAEZ00000008.1	LM08CHG001878.mRNA1
3	transcript:Zm00001eb120650_T001	==	GWHAAEZ00000008.1	LM08CHG003760.mRNA1
3	transcript:Zm00001eb128970_T001	==	GWHAAEZ00000008.1	LM08CHG002937.mRNA1
3	transcript:Zm00001eb153070_T001	==	GWHAAEZ00000008.1	LM08CHG001354.mRNA1
3	transcript:Zm00001eb153070_T001	==	GWHAAEZ00000010.1	LM10CHG001729.mRNA1
3	transcript:Zm00001eb158120_T001	==	GWHAAEZ00000010.1	LM10CHG001417.mRNA1
4	transcript:Zm00001eb204310_T001	==	GWHAAEZ00000006.1	LM06CHG002717.mRNA1
4	transcript:Zm00001eb178900_T001	==	GWHAAEZ00000009.1	LM09CHG001062.mRNA1
4	transcript:Zm00001eb194160_T001	==	GWHAAEZ00000012.1	LM12CHG002715.mRNA1
4	transcript:Zm00001eb204310_T001	==	GWHAAEZ00000012.1	LM12CHG000876.mRNA1
4	transcript:Zm00001eb204310_T001	==	GWHAAEZ00000016.1	LM16CHG001478.mRNA1
4	transcript:Zm00001eb178900_T001	==	GWHAAEZ00000018.1	LM18CHG000947.mRNA1
5	transcript:Zm00001eb217380_T001	==	GWHAAEZ00000001.1	LM01CHG001237.mRNA1
5	transcript:Zm00001eb213230_T001	==	GWHAAEZ00000002.1	LM02CHG003718.mRNA1
5	transcript:Zm00001eb213230_T001	==	GWHAAEZ00000004.1	LM04CHG000504.mRNA1
5	transcript:Zm00001eb217380_T001	==	GWHAAEZ00000004.1	LM04CHG001166.mRNA1
5	transcript:Zm00001eb233250_T001	==	GWHAAEZ00000006.1	LM06CHG003065.mRNA1
5	transcript:Zm00001eb213230_T001	==	GWHAAEZ00000011.1	LM11CHG003363.mRNA1
5	transcript:Zm00001eb255230_T001	==	GWHAAEZ00000012.1	LM12CHG002715.mRNA1
5	transcript:Zm00001eb233250_T001	==	GWHAAEZ00000012.1	LM12CHG000434.mRNA1
6	transcript:Zm00001eb293830_T001	==	GWHAAEZ00000003.1	LM03CHG001809.mRNA1
6	transcript:Zm00001eb296490_T001	==	GWHAAEZ00000003.1	LM03CHG001465.mRNA1
6	transcript:Zm00001eb293830_T001	==	GWHAAEZ00000005.1	LM05CHG002915.mRNA1
6	transcript:Zm00001eb274360_T002	==	GWHAAEZ00000006.1	LM06CHG003065.mRNA1
6	transcript:Zm00001eb275700_T001	==	GWHAAEZ00000007.1	LM07CHG002011.mRNA1
6	transcript:Zm00001eb274360_T002	==	GWHAAEZ00000007.1	LM07CHG002263.mRNA1
6	transcript:Zm00001eb276740_T001	==	GWHAAEZ00000007.1	LM07CHG001929.mRNA1
6	transcript:Zm00001eb296490_T001	==	GWHAAEZ00000008.1	LM08CHG001878.mRNA1
6	transcript:Zm00001eb293830_T001	==	GWHAAEZ00000008.1	LM08CHG001354.mRNA1
6	transcript:Zm00001eb259970_T001	==	GWHAAEZ00000009.1	LM09CHG002345.mRNA1
6	transcript:Zm00001eb293830_T001	==	GWHAAEZ00000010.1	LM10CHG001729.mRNA1
6	transcript:Zm00001eb296490_T001	==	GWHAAEZ00000010.1	LM10CHG001417.mRNA1
6	transcript:Zm00001eb274360_T002	==	GWHAAEZ00000012.1	LM12CHG000434.mRNA1
6	transcript:Zm00001eb274360_T002	==	GWHAAEZ00000016.1	LM16CHG002056.mRNA1
6	transcript:Zm00001eb275700_T001	==	GWHAAEZ00000016.1	LM16CHG001824.mRNA1
6	transcript:Zm00001eb276740_T001	==	GWHAAEZ00000016.1	LM16CHG001749.mRNA1
7	transcript:Zm00001eb327890_T001	==	GWHAAEZ00000001.1	LM01CHG003460.mRNA1
7	transcript:Zm00001eb327890_T001	==	GWHAAEZ00000002.1	LM02CHG000415.mRNA1
7	transcript:Zm00001eb311250_T001	==	GWHAAEZ00000002.1	LM02CHG002290.mRNA1
7	transcript:Zm00001eb300540_T001	==	GWHAAEZ00000002.1	LM02CHG003718.mRNA1
7	transcript:Zm00001eb327890_T001	==	GWHAAEZ00000004.1	LM04CHG003262.mRNA1
7	transcript:Zm00001eb300540_T001	==	GWHAAEZ00000004.1	LM04CHG000504.mRNA1
7	transcript:Zm00001eb311250_T001	==	GWHAAEZ00000009.1	LM09CHG001062.mRNA1
7	transcript:Zm00001eb327890_T001	==	GWHAAEZ00000011.1	LM11CHG000385.mRNA1
7	transcript:Zm00001eb300540_T001	==	GWHAAEZ00000011.1	LM11CHG003363.mRNA1
7	transcript:Zm00001eb311250_T001	==	GWHAAEZ00000018.1	LM18CHG000947.mRNA1
8	transcript:Zm00001eb352450_T001	==	GWHAAEZ00000003.1	LM03CHG002004.mRNA1
8	transcript:Zm00001eb344290_T001	==	GWHAAEZ00000003.1	LM03CHG001465.mRNA1
8	transcript:Zm00001eb369260_T001	==	GWHAAEZ00000003.1	LM03CHG002004.mRNA1
8	transcript:Zm00001eb353330_T001	==	GWHAAEZ00000003.1	LM03CHG001809.mRNA1
8	transcript:Zm00001eb352450_T001	==	GWHAAEZ00000005.1	LM05CHG003286.mRNA1
8	transcript:Zm00001eb369260_T001	==	GWHAAEZ00000005.1	LM05CHG003286.mRNA1
8	transcript:Zm00001eb338030_T001	==	GWHAAEZ00000005.1	LM05CHG000263.mRNA1
8	transcript:Zm00001eb353330_T001	==	GWHAAEZ00000005.1	LM05CHG002915.mRNA1
8	transcript:Zm00001eb369260_T001	==	GWHAAEZ00000008.1	LM08CHG001003.mRNA1
8	transcript:Zm00001eb338030_T001	==	GWHAAEZ00000008.1	LM08CHG003760.mRNA1
8	transcript:Zm00001eb353330_T001	==	GWHAAEZ00000008.1	LM08CHG001354.mRNA1
8	transcript:Zm00001eb344290_T001	==	GWHAAEZ00000008.1	LM08CHG001878.mRNA1
8	transcript:Zm00001eb352450_T001	==	GWHAAEZ00000008.1	LM08CHG001003.mRNA1
8	transcript:Zm00001eb352450_T001	==	GWHAAEZ00000010.1	LM10CHG001921.mRNA1
8	transcript:Zm00001eb344290_T001	==	GWHAAEZ00000010.1	LM10CHG001417.mRNA1
8	transcript:Zm00001eb369260_T001	==	GWHAAEZ00000010.1	LM10CHG001921.mRNA1
8	transcript:Zm00001eb353330_T001	==	GWHAAEZ00000010.1	LM10CHG001729.mRNA1
9	transcript:Zm00001eb392380_T001	==	GWHAAEZ00000001.1	LM01CHG003460.mRNA1
9	transcript:Zm00001eb395660_T001	==	GWHAAEZ00000001.1	LM01CHG003831.mRNA1
9	transcript:Zm00001eb392380_T001	==	GWHAAEZ00000002.1	LM02CHG000415.mRNA1
9	transcript:Zm00001eb392380_T001	==	GWHAAEZ00000004.1	LM04CHG003262.mRNA1
9	transcript:Zm00001eb395660_T001	==	GWHAAEZ00000004.1	LM04CHG003611.mRNA1
9	transcript:Zm00001eb383280_T001	==	GWHAAEZ00000006.1	LM06CHG002717.mRNA1
9	transcript:Zm00001eb389870_T001	==	GWHAAEZ00000007.1	LM07CHG002263.mRNA1
9	transcript:Zm00001eb386240_T001	==	GWHAAEZ00000007.1	LM07CHG001929.mRNA1
9	transcript:Zm00001eb388100_T001	==	GWHAAEZ00000007.1	LM07CHG002011.mRNA1
9	transcript:Zm00001eb383280_T001	==	GWHAAEZ00000012.1	LM12CHG000876.mRNA1
9	transcript:Zm00001eb383280_T001	==	GWHAAEZ00000016.1	LM16CHG001478.mRNA1
9	transcript:Zm00001eb389870_T001	==	GWHAAEZ00000016.1	LM16CHG002056.mRNA1
9	transcript:Zm00001eb386240_T001	==	GWHAAEZ00000016.1	LM16CHG001749.mRNA1
9	transcript:Zm00001eb388100_T001	==	GWHAAEZ00000016.1	LM16CHG001824.mRNA1
9	transcript:Zm00001eb395510_T002	==	GWHAAEZ00000017.1	LM17CHG000112.mRNA1
10	transcript:Zm00001eb405310_T001	==	GWHAAEZ00000003.1	LM03CHG000128.mRNA1
10	transcript:Zm00001eb405310_T001	==	GWHAAEZ00000010.1	LM10CHG000070.mRNA1
10	transcript:Zm00001eb405310_T001	==	GWHAAEZ00000013.1	LM13CHG001752.mRNA1
10	transcript:Zm00001eb432030_T001	==	GWHAAEZ00000014.1	LM14CHG000340.mRNA1
10	transcript:Zm00001eb434260_T001	==	GWHAAEZ00000014.1	LM14CHG000060.mRNA1
10	transcript:Zm00001eb432030_T001	==	GWHAAEZ00000015.1	LM15CHG002318.mRNA1
10	transcript:Zm00001eb434260_T001	==	GWHAAEZ00000015.1	LM15CHG002603.mRNA1
10	transcript:Zm00001eb405310_T001	==	GWHAAEZ00000017.1	LM17CHG000112.mRNA1
