# Supplementary material for: Genome-wide identification and drought-responsive root expression profiling of the VQ gene family in proso millet ( Panicum miliaceum L.)
Source: PeerJ journal article supplement (doi:10.7717/peerj.20792), 2026-02-10
Supplement: TableS6.xlsx [file TableS6.xlsx]

## Sheet: Transcriptome data for millet
Gene_ID	seedling_1w	shoot_3w	leaf_blade_8w	leaf_sheath_8w	stem_8w	inflorescences_8w	root_8w	seed_mature	GO_annotation
PM01G00010	10.58	1.92	0	1.15	48.46	201.74	3.6	17.75	GO:0048046:apoplast|GO:0005618:cell wall|GO:0070417:cellular response to cold|GO:0009707:chloroplast outer membrane|GO:0009535:chloroplast thylakoid membrane|GO:0009631:cold acclimation|GO:0050832:defense response to fungus|GO:0005783:endoplasmic reticulum|GO:0005576:extracellular region|GO:0009682:induced systemic resistance|GO:0008289:lipid binding|GO:0006869:lipid transport|GO:0008233:peptidas…
PM01G00020	3.72	1.21	0.05	0.13	2.84	3.69	1.97	0.14	GO:0005618:cell wall|GO:0071555:cell wall organization|GO:0005576:extracellular region|GO:0016020:membrane|GO:0003674:molecular_function|GO:0009828:plant-type cell wall loosening|GO:0009831:plant-type cell wall modification involved in multidimensional cell growth|GO:0009664:plant-type cell wall organization|GO:0009506:plasmodesma|GO:0019953:sexual reproduction|GO:0006949:syncytium formation|GO:0…
PM01G00030	2.81	1.39	3.55	3.11	3.8	2.76	2.77	2.74
PM01G00040	3.8	0.73	0	0	1.38	0.73	9.19	0.72	GO:0005618:cell wall|GO:0071555:cell wall organization|GO:0005576:extracellular region|GO:0016020:membrane|GO:0009828:plant-type cell wall loosening|GO:0009831:plant-type cell wall modification involved in multidimensional cell growth|GO:0009664:plant-type cell wall organization|GO:0009506:plasmodesma|GO:0019953:sexual reproduction|GO:0006949:syncytium formation|GO:0009826:unidimensional cell gro…
PM01G00050	7.91	8.25	15.36	21.9	20.71	14.55	13.12	11.16	GO:0008150:biological_process|GO:0016787:hydrolase activity|GO:0005634:nucleus
PM01G00060	3.96	1.54	8.68	8.33	4.1	2.89	2.17	3.55	GO:0051213:dioxygenase activity
PM01G00070	6.51	2.38	20.17	11.38	10.47	7.42	7.09	0.42	GO:0006189:'de novo' IMP biosynthetic process|GO:0016597:amino acid binding|GO:0009058:biosynthetic process|GO:0005575:cellular_component|GO:0008864:formyltetrahydrofolate deformylase activity|GO:0016742:hydroxymethyl-, formyl- and related transferase activity|GO:0005739:mitochondrion|GO:0043581:mycelium development|GO:0006730:one-carbon metabolic process|GO:0009853:photorespiration|GO:0009152:pu…
PM01G00080	3.79	2.45	8.39	5.16	7.15	5.75	4.4	7.25	GO:0016831:carboxy-lyase activity|GO:0005575:cellular_component|GO:0016021:integral component of membrane|GO:0006629:lipid metabolic process|GO:0016829:lyase activity|GO:0016020:membrane|GO:0005743:mitochondrial inner membrane|GO:0005739:mitochondrion|GO:0005634:nucleus|GO:0006656:phosphatidylcholine biosynthetic process|GO:0006646:phosphatidylethanolamine biosynthetic process|GO:0004609:phosphat…
PM01G00090	4.81	12.45	19.89	17.37	12.21	10.35	11.52	4.4	GO:0005524:ATP binding|GO:0004003:ATP-dependent DNA helicase activity|GO:0008026:ATP-dependent helicase activity|GO:0016887:ATPase activity|GO:0003677:DNA binding|GO:0006281:DNA repair|GO:0006974:cellular response to DNA damage stimulus|GO:0016568:chromatin modification|GO:0006338:chromatin remodeling|GO:0005737:cytoplasm|GO:0070911:global genome nucleotide-excision repair|GO:0004386:helicase act…
PM01G00100	1.25	1.9	3.41	6.05	4.98	4.31	5.22	12.86
PM01G00110	25.85	25.45	30.74	30.89	14.85	22.06	13.26	56.05	GO:0003960:NADPH:quinone reductase activity|GO:0030154:cell differentiation|GO:0005618:cell wall|GO:0009507:chloroplast|GO:0005737:cytoplasm|GO:0005829:cytosol|GO:0005576:extracellular region|GO:0008152:metabolic process|GO:0055114:oxidation-reduction process|GO:0016491:oxidoreductase activity|GO:0016655:oxidoreductase activity, acting on NAD(P)H, quinone or similar compound as acceptor|GO:001662…
PM01G00120	4.07	3.36	4.56	4.75	3.07	2.68	4.58	3.54	GO:0008150:biological_process|GO:0005575:cellular_component|GO:0009507:chloroplast|GO:0005829:cytosol|GO:0016311:dephosphorylation|GO:0003674:molecular_function|GO:0043581:mycelium development|GO:0005634:nucleus|GO:0050278:sedoheptulose-bisphosphatase activity
PM01G00130	18.43	22.19	67.46	52.58	15.13	13.46	1.72	0.85	GO:0046323:glucose import|GO:0005355:glucose transmembrane transporter activity|GO:0035428:hexose transmembrane transport|GO:0005887:integral component of plasma membrane|GO:0005351:sugar:proton symporter activity
PM01G00140	9.69	7.48	12.4	17.96	11.89	10.99	16.89	6.58	GO:0043231:intracellular membrane-bounded organelle|GO:0005764:lysosome|GO:0016790:thiolester hydrolase activity
PM01G00150	0.06	0.05	0.05	0.2	0.15	0.2	0.12	0.45	GO:1902600:hydrogen ion transmembrane transport|GO:0008553:hydrogen-exporting ATPase activity, phosphorylative mechanism|GO:0005887:integral component of plasma membrane|GO:0043231:intracellular membrane-bounded organelle|GO:0051453:regulation of intracellular pH
PM01G00160	0.26	0.03	0	0	0.02	0	0.11	123.19	GO:0005737:cytoplasm|GO:0005576:extracellular region|GO:0016021:integral component of membrane|GO:0019915:lipid storage|GO:0016020:membrane|GO:0003674:molecular_function|GO:0012511:monolayer-surrounded lipid storage body|GO:0019953:sexual reproduction
PM01G00170	1.1	2.31	4.73	8.3	8.09	5.86	6.79	8.29	GO:0003723:RNA binding|GO:0001510:RNA methylation|GO:0008173:RNA methyltransferase activity|GO:0006396:RNA processing|GO:0008168:methyltransferase activity|GO:0016423:tRNA (guanine) methyltransferase activity|GO:0030488:tRNA methylation
PM01G00180	2.94	2.83	7.56	7.84	8.26	4.67	15.16	2.35	GO:0005794:Golgi apparatus|GO:0000139:Golgi membrane|GO:0008150:biological_process|GO:0005575:cellular_component|GO:0005737:cytoplasm|GO:0005783:endoplasmic reticulum|GO:0005789:endoplasmic reticulum membrane|GO:0016021:integral component of membrane|GO:0016020:membrane|GO:0005739:mitochondrion|GO:0003674:molecular_function|GO:0055120:striated muscle dense body|GO:0071688:striated muscle myosin t…
PM01G00190	2.78	1.71	1.9	6.13	4.1	2.28	4.3	2.19	GO:0005794:Golgi apparatus|GO:0005737:cytoplasm|GO:0003684:damaged DNA binding|GO:0000724:double-strand break repair via homologous recombination|GO:0016021:integral component of membrane|GO:0000110:nucleotide-excision repair factor 1 complex|GO:1901255:nucleotide-excision repair involved in interstrand cross-link repair|GO:0006296:nucleotide-excision repair, DNA incision, 5'-to lesion|GO:0003755…
PM01G00200	73.07	11	5.18	2.95	1.44	0.97	1.8	0.06	GO:0008124:4-alpha-hydroxytetrahydrobiopterin dehydratase activity|GO:0009507:chloroplast|GO:0004160:dihydroxy-acid dehydratase activity|GO:0006729:tetrahydrobiopterin biosynthetic process
PM01G00210	0.01	0.01	0	0.02	0.03	0	0.02	0.01
PM01G00220	3.68	5.29	0.15	0.39	0.19	1.83	0	0	GO:0005524:ATP binding|GO:0009507:chloroplast|GO:0016301:kinase activity|GO:0000287:magnesium ion binding|GO:0009116:nucleoside metabolic process|GO:0009165:nucleotide biosynthetic process|GO:0016310:phosphorylation|GO:0009536:plastid|GO:0009152:purine ribonucleotide biosynthetic process|GO:0009156:ribonucleoside monophosphate biosynthetic process|GO:0004749:ribose phosphate diphosphokinase activ…
PM01G00230	0	0	0	0	0	0	0.06	0	GO:0005528:FK506 binding|GO:0061077:chaperone-mediated protein folding|GO:0005789:endoplasmic reticulum membrane|GO:0003755:peptidyl-prolyl cis-trans isomerase activity
PM01G00240	0	0	0	0.01	0	0	0.02	0.03	GO:0005794:Golgi apparatus|GO:0042938:dipeptide transport|GO:0042936:dipeptide transporter activity|GO:0015334:high-affinity oligopeptide transporter activity|GO:0016021:integral component of membrane|GO:0010150:leaf senescence|GO:0016020:membrane|GO:0042128:nitrate assimilation|GO:0015112:nitrate transmembrane transporter activity|GO:0015706:nitrate transport|GO:0006807:nitrogen compound metabol…
PM01G00250	36.83	45.48	68.72	72.33	65.03	72.73	77.53	72.35	GO:0005525:GTP binding|GO:0003924:GTPase activity|GO:0036498:IRE1-mediated unfolded protein response|GO:0006614:SRP-dependent cotranslational protein targeting to membrane|GO:0006613:cotranslational protein targeting to membrane|GO:0005783:endoplasmic reticulum|GO:0005789:endoplasmic reticulum membrane|GO:0070062:extracellular exosome|GO:0016021:integral component of membrane|GO:0006886:intracell…
PM01G00260	33.99	8.23	4.45	9.4	44.21	22.79	50.95	31.22	GO:0005525:GTP binding|GO:0003924:GTPase activity|GO:0005794:Golgi apparatus|GO:0048046:apoplast|GO:0005618:cell wall|GO:0009507:chloroplast|GO:0009570:chloroplast stroma|GO:0005737:cytoplasm|GO:0005829:cytosol|GO:0016020:membrane|GO:0005874:microtubule|GO:0015630:microtubule cytoskeleton|GO:0000226:microtubule cytoskeleton organization|GO:0007017:microtubule-based process|GO:0005730:nucleolus|GO…
PM01G00270	1.67	1.44	1.67	1.43	0.81	1.04	2.38	0.67	GO:0003680:AT DNA binding|GO:0003677:DNA binding|GO:0098687:chromosomal region|GO:0005737:cytoplasm|GO:0005829:cytosol|GO:0005739:mitochondrion|GO:0005730:nucleolus|GO:0005654:nucleoplasm|GO:0005634:nucleus|GO:0005515:protein binding|GO:0043621:protein self-association|GO:0006355:regulation of transcription, DNA-templated|GO:0043565:sequence-specific DNA binding|GO:0006351:transcription, DNA-temp…
PM01G00280	24.45	22.86	26.78	20.11	12.23	14.53	2.56	5.67	GO:0005253:anion channel activity|GO:0008509:anion transmembrane transporter activity|GO:0006820:anion transport|GO:0008150:biological_process|GO:0005575:cellular_component|GO:0009507:chloroplast|GO:0031969:chloroplast membrane|GO:0009533:chloroplast stromal thylakoid|GO:0016021:integral component of membrane|GO:0003674:molecular_function|GO:0005886:plasma membrane|GO:0042548:regulation of photos…
PM01G00290	3.29	12.14	21.66	24.78	22.67	20.06	15.76	26.89	GO:0001105:RNA polymerase II transcription coactivator activity|GO:0001104:RNA polymerase II transcription cofactor activity|GO:0016592:mediator complex|GO:0005634:nucleus|GO:0048573:photoperiodism, flowering|GO:0045944:positive regulation of transcription from RNA polymerase II promoter|GO:0040034:regulation of development, heterochronic|GO:0090213:regulation of radial pattern formation|GO:00063…
PM01G00300	5.01	4.76	3.44	2.41	6.53	2.4	1.48	0.45	GO:0008150:biological_process|GO:0003674:molecular_function|GO:0005634:nucleus|GO:0009506:plasmodesma|GO:0009739:response to gibberellin|GO:0016740:transferase activity
PM01G00310	0.29	0.07	0.04	0.07	0.39	0.16	0.43	0	GO:0009554:megasporogenesis|GO:0009556:microsporogenesis|GO:0005634:nucleus|GO:0005515:protein binding
PM01G00320	86.94	34.77	47.21	56.28	95.89	59.33	101.12	168.91	GO:0022627:cytosolic small ribosomal subunit|GO:0000028:ribosomal small subunit assembly|GO:0003735:structural constituent of ribosome
PM01G00330	0.59	0.47	0.64	0.88	1.53	0.69	0.85	0.51	GO:0052656:L-isoleucine transaminase activity|GO:0052654:L-leucine transaminase activity|GO:0071267:L-methionine salvage|GO:0052655:L-valine transaminase activity|GO:0009082:branched-chain amino acid biosynthetic process|GO:0009081:branched-chain amino acid metabolic process|GO:0004084:branched-chain-amino-acid transaminase activity|GO:0003824:catalytic activity|GO:0009507:chloroplast|GO:0009570:…
PM01G00340	3.87	5.72	3.11	3.97	5.12	4.7	2.58	1.31	GO:0015297:antiporter activity|GO:0008150:biological_process|GO:0006812:cation transport|GO:0005575:cellular_component|GO:1902600:hydrogen ion transmembrane transport|GO:0006818:hydrogen transport|GO:0016021:integral component of membrane|GO:0006811:ion transport|GO:0016020:membrane|GO:0003674:molecular_function|GO:0071805:potassium ion transmembrane transport|GO:0015079:potassium ion transmembra…
PM01G00350	3.96	2.48	0.1	0.29	6.75	3.71	3.37	0.43	GO:0005524:ATP binding|GO:0070370:cellular heat acclimation|GO:0042742:defense response to bacterium|GO:0050832:defense response to fungus|GO:0009553:embryo sac development|GO:0005576:extracellular region|GO:0048281:inflorescence morphogenesis|GO:0016021:integral component of membrane|GO:0016301:kinase activity|GO:0009965:leaf morphogenesis|GO:0016020:membrane|GO:0005739:mitochondrion|GO:0042277:…
PM01G00360	5.72	6	4.37	10.58	18.86	13.59	4.19	12.66
PM01G00370	3.28	1.35	0.08	0.17	2.78	0.81	3.02	0.03	GO:0005634:nucleus|GO:0003700:transcription factor activity, sequence-specific DNA binding
PM01G00380	0.4	0.37	0.06	0.15	1.12	0.2	1.43	0.05	GO:0003677:DNA binding|GO:0009901:anther dehiscence|GO:1990110:callus formation|GO:0071555:cell wall organization|GO:0071365:cellular response to auxin stimulus|GO:0050832:defense response to fungus|GO:0009793:embryo development ending in seed dormancy|GO:0010047:fruit dehiscence|GO:0042802:identical protein binding|GO:0009809:lignin biosynthetic process|GO:0090058:metaxylem development|GO:000727…
PM01G00390	1.29	0.18	0.08	0.37	1.04	0.15	0.48	0	GO:1990110:callus formation|GO:0071555:cell wall organization|GO:0007275:multicellular organism development|GO:0005634:nucleus|GO:1901348:positive regulation of secondary cell wall biogenesis|GO:0005515:protein binding|GO:0006355:regulation of transcription, DNA-templated|GO:0010200:response to chitin|GO:0003700:transcription factor activity, sequence-specific DNA binding|GO:0044212:transcription…
PM01G00400	8.66	1.7	4.17	2.64	3.77	0.77	1.86	0.08
PM01G00410	8.88	11.74	24.68	16.98	8.27	21.79	3.13	3.62	GO:0005524:ATP binding|GO:0005737:cytoplasm|GO:0005829:cytosol|GO:0035556:intracellular signal transduction|GO:0016301:kinase activity|GO:0005634:nucleus|GO:0005886:plasma membrane|GO:0009536:plastid|GO:0005267:potassium channel activity|GO:0010107:potassium ion import|GO:0005515:protein binding|GO:0006468:protein phosphorylation|GO:0004674:protein serine/threonine kinase activity|GO:0007584:resp…
PM01G00420	41.66	18.11	6.73	16.63	27.79	96.14	20.58	5.01	GO:0046916:cellular transition metal ion homeostasis|GO:0005737:cytoplasm|GO:0030001:metal ion transport|GO:0046914:transition metal ion binding
PM01G00430	0	0	0	0	0.04	0.15	0.03	0.71
PM01G00440	0	0.03	0	0	0.05	0.07	0	0.23
PM01G00450	2.03	0.19	0.02	0.21	0.61	0.44	2.95	0.12	GO:0003677:DNA binding|GO:0008150:biological_process|GO:0030863:cortical cytoskeleton|GO:0009553:embryo sac development|GO:0003674:molecular_function|GO:0045892:negative regulation of transcription, DNA-templated|GO:0005730:nucleolus|GO:0005634:nucleus|GO:0005886:plasma membrane|GO:2000652:regulation of secondary cell wall biogenesis|GO:0006351:transcription, DNA-templated
PM01G00460	6.76	7.78	4.85	3.85	6.02	11.15	4.34	1.66	GO:0005634:nucleus|GO:0042803:protein homodimerization activity|GO:0003714:transcription corepressor activity
PM01G00470	15.72	9.23	16.04	21.84	5.8	18.13	32.42	4.38	GO:0004048:anthranilate phosphoribosyltransferase activity|GO:0003824:catalytic activity|GO:0009507:chloroplast|GO:0009941:chloroplast envelope|GO:0009570:chloroplast stroma|GO:0005829:cytosol|GO:0009536:plastid|GO:0000162:tryptophan biosynthetic process
PM01G00480	11.64	4.55	11.25	15.38	5.76	4.23	4.65	0.16
PM01G00490	11.86	10.99	18.69	29.69	23.99	16.84	21.42	4.24	GO:0008150:biological_process|GO:0005575:cellular_component|GO:0016021:integral component of membrane|GO:0005739:mitochondrion|GO:0003674:molecular_function|GO:0005886:plasma membrane
PM01G00500	8.68	2.69	8.67	7.35	5.97	4.38	8.81	3.48	GO:0009788:negative regulation of abscisic acid-activated signaling pathway|GO:0005634:nucleus|GO:0032436:positive regulation of proteasomal ubiquitin-dependent protein catabolic process|GO:0005515:protein binding
PM01G00510	27.69	32.19	9.73	23.54	27.58	14.95	10.16	0.53	GO:0005524:ATP binding|GO:0009507:chloroplast|GO:0007623:circadian rhythm|GO:0032502:developmental process|GO:0016021:integral component of membrane|GO:0016301:kinase activity|GO:0005634:nucleus|GO:0016310:phosphorylation|GO:0005886:plasma membrane|GO:0009506:plasmodesma|GO:0046777:protein autophosphorylation|GO:0006468:protein phosphorylation|GO:0004674:protein serine/threonine kinase activity
PM01G00520	4.57	4.76	7.13	6.26	4.78	5.46	4.38	12	GO:0005524:ATP binding|GO:0017050:D-erythro-sphingosine kinase activity|GO:0005794:Golgi apparatus|GO:0000139:Golgi membrane|GO:0008150:biological_process|GO:0019722:calcium-mediated signaling|GO:0005575:cellular_component|GO:0005737:cytoplasm|GO:0004143:diacylglycerol kinase activity|GO:0009247:glycolipid biosynthetic process|GO:0016301:kinase activity|GO:0006629:lipid metabolic process|GO:00160…
PM01G00530	19.12	13.76	30.33	33.87	25.83	24.04	24.1	67.43	GO:0008150:biological_process|GO:0005694:chromosome|GO:0000775:chromosome, centromeric region|GO:0000781:chromosome, telomeric region|GO:0000777:condensed chromosome kinetochore|GO:0005737:cytoplasm|GO:0005622:intracellular|GO:0043231:intracellular membrane-bounded organelle|GO:0000776:kinetochore|GO:0005739:mitochondrion|GO:0007080:mitotic metaphase plate congression|GO:0008285:negative regulati…
PM01G00540	4.14	2.02	1.06	1.94	2.37	2.87	16.71	2.05	GO:0010291:carotene beta-ring hydroxylase activity|GO:0016119:carotene metabolic process|GO:0009507:chloroplast|GO:0031969:chloroplast membrane|GO:0006633:fatty acid biosynthetic process|GO:0016787:hydrolase activity|GO:0016021:integral component of membrane|GO:0005506:iron ion binding|GO:0055114:oxidation-reduction process|GO:0016491:oxidoreductase activity|GO:0016123:xanthophyll biosynthetic pr…
PM01G00550	157.76	165.81	81.47	31.68	24.96	44.55	3.04	8.44	GO:0009507:chloroplast|GO:0009941:chloroplast envelope|GO:0009570:chloroplast stroma|GO:0022625:cytosolic large ribosomal subunit|GO:0022626:cytosolic ribosome|GO:0016020:membrane|GO:0019843:rRNA binding|GO:0009735:response to cytokinin|GO:0000027:ribosomal large subunit assembly|GO:0003735:structural constituent of ribosome|GO:0006412:translation
PM01G00560	0.28	0.05	0.04	0.04	0.12	0.33	0.68	0.01	GO:0008150:biological_process|GO:0005575:cellular_component|GO:0009507:chloroplast|GO:0060027:convergent extension involved in gastrulation|GO:0008234:cysteine-type peptidase activity|GO:0005737:cytoplasm|GO:0016787:hydrolase activity|GO:0003674:molecular_function|GO:0008233:peptidase activity|GO:0005886:plasma membrane|GO:0006508:proteolysis
PM01G00570	2.97	1.6	1.07	0.63	1.51	0.28	0.9	0.05
PM01G00580	0.14	0.23	0.02	0.07	0.03	0.02	7.42	0
PM01G00590	27.07	48.25	11.84	16.49	27.23	17.94	19.2	3.99	GO:0005524:ATP binding|GO:0009738:abscisic acid-activated signaling pathway|GO:0008150:biological_process|GO:0009742:brassinosteroid mediated signaling pathway|GO:0005623:cell|GO:0097275:cellular ammonia homeostasis|GO:0009507:chloroplast|GO:0050832:defense response to fungus|GO:0005783:endoplasmic reticulum|GO:0009873:ethylene-activated signaling pathway|GO:0005576:extracellular region|GO:004368…
PM01G00600	5.47	5.82	3.87	4.27	8.82	2.97	10.55	0	GO:0005524:ATP binding|GO:0008150:biological_process|GO:0009742:brassinosteroid mediated signaling pathway|GO:0005623:cell|GO:0097275:cellular ammonia homeostasis|GO:0009507:chloroplast|GO:0005783:endoplasmic reticulum|GO:0005576:extracellular region|GO:0016021:integral component of membrane|GO:0016301:kinase activity|GO:0005634:nucleus|GO:0016310:phosphorylation|GO:0009705:plant-type vacuole mem…
PM01G00610	0.29	0.43	0.21	0.16	0.08	2.47	0.26	0	GO:0005794:Golgi apparatus|GO:0008150:biological_process|GO:0005783:endoplasmic reticulum|GO:0005576:extracellular region|GO:0016021:integral component of membrane|GO:0005634:nucleus|GO:0005886:plasma membrane|GO:0016740:transferase activity|GO:0016757:transferase activity, transferring glycosyl groups
PM01G00620	13.89	20.27	21.32	26.17	6.44	9.4	19.59	0.03	GO:0003677:DNA binding|GO:0005737:cytoplasm|GO:0005829:cytosol|GO:0010229:inflorescence development|GO:0080006:internode patterning|GO:0009965:leaf morphogenesis|GO:0010076:maintenance of floral meristem identity|GO:0010077:maintenance of inflorescence meristem identity|GO:0005634:nucleus|GO:0048645:organ formation|GO:0007389:pattern specification process|GO:0048481:plant ovule development|GO:000…
PM01G00630	12.2	29.66	6.57	6.2	4.95	2.31	47.67	1.54	GO:0008150:biological_process|GO:0009970:cellular response to sulfate starvation|GO:0005737:cytoplasm|GO:0016787:hydrolase activity|GO:0016021:integral component of membrane|GO:0005739:mitochondrion
PM01G00640	43.13	24.42	8.4	12.19	26.15	27.84	8.58	0.23	GO:0003677:DNA binding|GO:0048440:carpel development|GO:0045165:cell fate commitment|GO:0001708:cell fate specification|GO:0071345:cellular response to cytokine stimulus|GO:0071369:cellular response to ethylene stimulus|GO:0009691:cytokinin biosynthetic process|GO:0009736:cytokinin-activated signaling pathway|GO:0005737:cytoplasm|GO:0005829:cytosol|GO:0009722:detection of cytokinin stimulus|GO:00…
PM01G00650	5.59	5.77	5.71	7.29	10.17	7.65	7.7	2.42	GO:0042023:DNA endoreduplication|GO:0006281:DNA repair|GO:0031572:G2 DNA damage checkpoint|GO:0005680:anaphase-promoting complex|GO:0010997:anaphase-promoting complex binding|GO:0031145:anaphase-promoting complex-dependent catabolic process|GO:0007049:cell cycle|GO:0051301:cell division|GO:0016049:cell growth|GO:0006974:cellular response to DNA damage stimulus|GO:0005737:cytoplasm|GO:0005834:hete…
PM01G00660	8.88	4.87	6.66	7.06	8.54	6.52	8.4	15.41	GO:0005794:Golgi apparatus|GO:0003723:RNA binding|GO:0008150:biological_process|GO:0009920:cell plate formation involved in plant-type cell wall biogenesis|GO:0005575:cellular_component|GO:0009507:chloroplast|GO:0009941:chloroplast envelope|GO:0009570:chloroplast stroma|GO:0019898:extrinsic component of membrane|GO:0030529:intracellular ribonucleoprotein complex|GO:0003729:mRNA binding|GO:0006397…
PM01G00670	40.7	9.46	29.41	20.98	17.87	11.81	33.21	10.47	GO:0019789:SUMO transferase activity|GO:0005737:cytoplasm|GO:0005634:nucleus|GO:0016925:protein sumoylation|GO:0061630:ubiquitin protein ligase activity|GO:0031625:ubiquitin protein ligase binding
PM01G00680	0	0	0	0.07	0.05	0	0.33	0	GO:0008150:biological_process|GO:0016021:integral component of membrane|GO:0003674:molecular_function|GO:0005634:nucleus|GO:0005774:vacuolar membrane|GO:0005773:vacuole
PM01G00690	8.16	24.08	12.92	7.82	2.17	5.16	1.86	0.2	GO:0003677:DNA binding|GO:0009838:abscission|GO:0030154:cell differentiation|GO:0005737:cytoplasm|GO:0010582:floral meristem determinacy|GO:0080187:floral organ senescence|GO:0009908:flower development|GO:0010150:leaf senescence|GO:0010076:maintenance of floral meristem identity|GO:0010077:maintenance of inflorescence meristem identity|GO:0010022:meristem determinacy|GO:0005634:nucleus|GO:0009911…
PM01G00700	0.06	0.21	0.63	0.44	0.48	0.62	0.17	0.58
PM01G00710	0	0	0	0	0	0.04	0	0.05	GO:0002250:adaptive immune response|GO:0019882:antigen processing and presentation|GO:0048002:antigen processing and presentation of peptide antigen|GO:0034769:basement membrane disassembly|GO:0097067:cellular response to thyroid hormone stimulus|GO:0005518:collagen binding|GO:0030574:collagen catabolic process|GO:0008656:cysteine-type endopeptidase activator activity involved in apoptotic proces…
PM01G00720	43.03	28.16	9.28	3.27	3.13	7.58	0.12	0.32	GO:0048046:apoplast|GO:0005509:calcium ion binding|GO:0009507:chloroplast|GO:0009941:chloroplast envelope|GO:0030095:chloroplast photosystem II|GO:0009570:chloroplast stroma|GO:0009534:chloroplast thylakoid|GO:0009543:chloroplast thylakoid lumen|GO:0009535:chloroplast thylakoid membrane|GO:0042742:defense response to bacterium|GO:0019898:extrinsic component of membrane|GO:0016020:membrane|GO:0015…
PM01G00730	47.97	50.19	16.3	9.42	11.33	12.12	3.77	1.75	GO:0009507:chloroplast|GO:0009941:chloroplast envelope|GO:0009570:chloroplast stroma|GO:0022625:cytosolic large ribosomal subunit|GO:0022626:cytosolic ribosome|GO:0016020:membrane|GO:0005762:mitochondrial large ribosomal subunit|GO:0019843:rRNA binding|GO:0000027:ribosomal large subunit assembly|GO:0005840:ribosome|GO:0042254:ribosome biogenesis|GO:0003735:structural constituent of ribosome|GO:00…
PM01G00740	4.16	2.43	3.68	4.49	5.62	4.19	3.37	8.07	GO:0005524:ATP binding|GO:0004004:ATP-dependent RNA helicase activity|GO:0008026:ATP-dependent helicase activity|GO:0003723:RNA binding|GO:0010501:RNA secondary structure unwinding|GO:0005634:nucleus|GO:0006364:rRNA processing
PM01G00750	2.44	0.25	0.04	0.06	1	0.22	0	0	GO:0003677:DNA binding|GO:0016597:amino acid binding|GO:0010052:guard cell differentiation|GO:0010377:guard cell fate commitment|GO:0051782:negative regulation of cell division|GO:0005634:nucleus|GO:0045597:positive regulation of cell differentiation|GO:0045893:positive regulation of transcription, DNA-templated|GO:0005515:protein binding|GO:0046983:protein dimerization activity|GO:0006355:regula…
PM01G00760	1.03	0.25	0.04	0.1	0.69	0.67	0.92	0.04	GO:0030154:cell differentiation|GO:0005634:nucleus|GO:0006355:regulation of transcription, DNA-templated|GO:0043565:sequence-specific DNA binding|GO:0003700:transcription factor activity, sequence-specific DNA binding
PM01G00770	0.49	1.19	1.48	1.14	1.2	2.12	4.42	11.32	GO:0005524:ATP binding|GO:0048102:autophagic cell death|GO:0005776:autophagosome|GO:0006914:autophagy|GO:0006995:cellular response to nitrogen starvation|GO:0005575:cellular_component|GO:0005737:cytoplasm|GO:0031410:cytoplasmic vesicle|GO:0042742:defense response to bacterium|GO:0044409:entry into host|GO:0035891:exit from host cell|GO:0035556:intracellular signal transduction|GO:0016301:kinase a…
PM01G00780	4.07	5.92	10.88	8.9	13.03	10.6	5.49	4.25	GO:0016442:RISC complex|GO:0003723:RNA binding|GO:0005737:cytoplasm|GO:0007275:multicellular organism development|GO:0005634:nucleus|GO:0035196:production of miRNAs involved in gene silencing by miRNA|GO:0030422:production of siRNA involved in RNA interference|GO:0004525:ribonuclease III activity
PM01G00790	76.32	60.7	33.92	12.3	9.99	14.57	0.12	0.41	GO:0003677:DNA binding|GO:0005794:Golgi apparatus|GO:0017025:TBP-class protein binding|GO:0003231:cardiac ventricle development|GO:0005737:cytoplasm|GO:0005829:cytosol|GO:0022626:cytosolic ribosome|GO:0070062:extracellular exosome|GO:0061384:heart trabecula morphogenesis|GO:0003674:molecular_function|GO:0051451:myoblast migration|GO:0030239:myofibril assembly|GO:0005854:nascent polypeptide-associ…
PM01G00800	0.08	0.03	0	0	0.1	0.06	0	0	GO:0004601:peroxidase activity|GO:0009505:plant-type cell wall|GO:0009664:plant-type cell wall organization
PM01G00810	0.04	0.05	0	0	0.04	0.08	0	0
PM01G00820	20.79	11.85	0.27	1.64	21.41	13.09	5.06	0.21	GO:0004601:peroxidase activity|GO:0009505:plant-type cell wall|GO:0009664:plant-type cell wall organization
PM01G00830	3.25	3.76	1.02	1.06	0.39	1.81	4.38	0	GO:0003677:DNA binding|GO:0009873:ethylene-activated signaling pathway|GO:0009908:flower development|GO:0048527:lateral root development|GO:0048366:leaf development|GO:0010358:leaf shaping|GO:0010073:meristem maintenance|GO:0009910:negative regulation of flower development|GO:0045892:negative regulation of transcription, DNA-templated|GO:0005634:nucleus|GO:0048573:photoperiodism, flowering|GO:008…
PM01G00840	5.74	2.93	13.31	1.79	9.01	7.07	14.48	0.37	GO:0046916:cellular transition metal ion homeostasis|GO:0005737:cytoplasm|GO:0005576:extracellular region|GO:0046872:metal ion binding|GO:0030001:metal ion transport|GO:0046914:transition metal ion binding
PM01G00850	3.51	3.62	6.08	5.58	5.65	5.54	5.37	1.1	GO:0008150:biological_process|GO:0006935:chemotaxis|GO:0016021:integral component of membrane|GO:0044351:macropinocytosis|GO:0016020:membrane|GO:0005739:mitochondrion|GO:0009705:plant-type vacuole membrane|GO:0005515:protein binding|GO:0005774:vacuolar membrane|GO:0046786:viral replication complex formation and maintenance|GO:0046790:virion binding
PM01G00860	3.25	0.51	0.08	0.54	2.38	2.07	1.81	0.06	GO:0003677:DNA binding|GO:0008150:biological_process|GO:0007267:cell-cell signaling|GO:0005575:cellular_component|GO:0005737:cytoplasm|GO:0005634:nucleus|GO:0005886:plasma membrane|GO:0009506:plasmodesma|GO:0005773:vacuole
PM01G00870	0	0	0	0.03	0	0.29	0.05	0	GO:0008150:biological_process|GO:0005575:cellular_component|GO:0003674:molecular_function|GO:0005634:nucleus
PM01G00880	7.55	1.34	0.7	0.49	10.47	2.18	0.83	1.84	GO:0008150:biological_process|GO:0009507:chloroplast|GO:0003674:molecular_function|GO:0030288:outer membrane-bounded periplasmic space|GO:0036094:small molecule binding|GO:0006810:transport
PM01G00890	6.74	4.52	9.03	8.91	9.16	9.43	2.9	14.23	GO:0000445:THO complex part of transcription export complex|GO:0000781:chromosome, telomeric region|GO:0006406:mRNA export from nucleus|GO:0003676:nucleic acid binding|GO:0000446:nucleoplasmic THO complex|GO:0006368:transcription elongation from RNA polymerase II promoter
PM01G00900	1.15	1.24	0.19	0.07	6.29	0.77	0.74	0.04	GO:0003677:DNA binding|GO:0007275:multicellular organism development|GO:0005634:nucleus|GO:0006355:regulation of transcription, DNA-templated|GO:0003700:transcription factor activity, sequence-specific DNA binding|GO:0006351:transcription, DNA-templated
PM01G00910	1.88	2.41	3.38	1.71	1.46	1.26	1.32	1.19	GO:0008150:biological_process|GO:0009793:embryo development ending in seed dormancy|GO:0005739:mitochondrion|GO:0003674:molecular_function
PM01G00920	5.34	16.34	26.06	29.11	35.03	32.18	19.98	25.75	GO:0006075:(1->3)-beta-D-glucan biosynthetic process|GO:0003843:1,3-beta-D-glucan synthase activity|GO:0000148:1,3-beta-D-glucan synthase complex|GO:0005794:Golgi apparatus|GO:0030479:actin cortical patch|GO:0005826:actomyosin contractile ring|GO:0030476:ascospore wall assembly|GO:0000935:barrier septum|GO:0009504:cell plate|GO:0071555:cell wall organization|GO:0005935:cellular bud neck|GO:000593…
PM01G00930	0.33	0.08	0.15	0.16	0.19	0.17	0	0.38
PM01G00940	22.75	16.35	1.91	10.28	30.11	38.15	11.05	18.12	GO:0005618:cell wall|GO:0004252:serine-type endopeptidase activity
PM01G00950	0.45	0.41	0.86	0.94	0.86	5.16	0.67	0.85	GO:0005096:GTPase activator activity|GO:0070290:N-acylphosphatidylethanolamine-specific phospholipase D activity|GO:0009738:abscisic acid-activated signaling pathway|GO:0005509:calcium ion binding|GO:0009507:chloroplast|GO:0009941:chloroplast envelope|GO:0030136:clathrin-coated vesicle|GO:0005737:cytoplasm|GO:0005829:cytosol|GO:0022626:cytosolic ribosome|GO:0009816:defense response to bacterium, …
PM01G00960	26.93	17.61	31.45	28.63	25.48	23.67	23.77	18.85	GO:0031418:L-ascorbic acid binding|GO:0005575:cellular_component|GO:0005506:iron ion binding|GO:0055114:oxidation-reduction process|GO:0016705:oxidoreductase activity, acting on paired donors, with incorporation or reduction of molecular oxygen|GO:0016706:oxidoreductase activity, acting on paired donors, with incorporation or reduction of molecular oxygen, 2-oxoglutarate as one donor, and incorpo…
PM01G00970	2.26	3.1	6.97	8.83	4.98	6.19	5.81	18.45	GO:0008150:biological_process|GO:0008652:cellular amino acid biosynthetic process|GO:0042384:cilium assembly|GO:0005737:cytoplasm|GO:0005829:cytosol|GO:0030425:dendrite|GO:0009793:embryo development ending in seed dormancy|GO:0019899:enzyme binding|GO:0005615:extracellular space|GO:0042802:identical protein binding|GO:0016021:integral component of membrane|GO:0016020:membrane|GO:0003674:molecular…
PM01G00980	107.21	108.34	56.38	115.74	73.59	116.91	57.37	28.38	GO:0003985:acetyl-CoA C-acetyltransferase activity|GO:0007420:brain development|GO:0003824:catalytic activity|GO:0071397:cellular response to cholesterol|GO:0071372:cellular response to follicle-stimulating hormone stimulus|GO:0071407:cellular response to organic cyclic compound|GO:0006695:cholesterol biosynthetic process|GO:0008203:cholesterol metabolic process|GO:0005737:cytoplasm|GO:0005829:cy…
PM01G00990	0.29	0.13	0.03	0.17	0.31	0.1	0.42	0.15	GO:0016832:aldehyde-lyase activity|GO:0007267:cell-cell signaling|GO:0005575:cellular_component|GO:0009507:chloroplast|GO:0046202:cyanide biosynthetic process|GO:0006952:defense response|GO:0009553:embryo sac development|GO:0005576:extracellular region|GO:0010430:fatty acid omega-oxidation|GO:0050660:flavin adenine dinucleotide binding|GO:0016021:integral component of membrane|GO:0046593:mandelon…
PM01G01000	21.01	5.76	5.38	28.11	28.42	4.42	16.37	32.94	GO:0008839:4-hydroxy-tetrahydrodipicolinate reductase|GO:0016998:cell wall macromolecule catabolic process|GO:0009570:chloroplast stroma|GO:0019877:diaminopimelate biosynthetic process|GO:0005576:extracellular region|GO:0016021:integral component of membrane|GO:0005739:mitochondrion|GO:0003674:molecular_function|GO:0019684:photosynthesis, light reaction
PM01G01010	18.92	11.47	15.48	26.83	19.32	10.56	23.33	51.45	GO:0006506:GPI anchor biosynthetic process|GO:0006505:GPI anchor metabolic process|GO:0005794:Golgi apparatus|GO:0000139:Golgi membrane|GO:0008150:biological_process|GO:0005783:endoplasmic reticulum|GO:0016788:hydrolase activity, acting on ester bonds|GO:0016021:integral component of membrane|GO:0031227:intrinsic component of endoplasmic reticulum membrane|GO:0016020:membrane|GO:0003674:molecular…
PM01G01020	8.8	4.87	2.95	6.9	16.19	10.53	10.08	7.38	GO:0006370:7-methylguanosine mRNA capping|GO:0005524:ATP binding|GO:0015030:Cajal body|GO:0006977:DNA damage response, signal transduction by p53 class mediator resulting in cell cycle arrest|GO:0042023:DNA endoreduplication|GO:0006281:DNA repair|GO:0006260:DNA replication|GO:0045023:G0 to G1 transition|GO:0000082:G1/S transition of mitotic cell cycle|GO:0000086:G2/M transition of mitotic cell cy…
PM01G01030	0.6	0.43	0.18	0.59	0.19	1.05	3.28	7.86	GO:0046964:3'-phosphoadenosine 5'-phosphosulfate transmembrane transporter activity|GO:0008643:carbohydrate transport|GO:0030173:integral component of Golgi membrane|GO:0030176:integral component of endoplasmic reticulum membrane|GO:0003674:molecular_function|GO:0005886:plasma membrane
PM01G01040	1.16	1.31	2.61	1.32	1.28	1.31	1.26	2.78
PM01G01050	3.16	1.77	0.04	0.24	0.79	0.83	2.12	0.07
PM01G01060	19.77	10.39	11.08	6.28	4.79	6.89	1.16	1.97	GO:0009507:chloroplast|GO:0016301:kinase activity|GO:0005739:mitochondrion|GO:0016310:phosphorylation
PM01G01070	1.18	0.16	0.07	0.23	0.91	0.97	0.25	0.33	GO:0005794:Golgi apparatus|GO:0007568:aging|GO:0048046:apoplast|GO:0005975:carbohydrate metabolic process|GO:0005618:cell wall|GO:0042546:cell wall biogenesis|GO:0016998:cell wall macromolecule catabolic process|GO:0042545:cell wall modification|GO:0071555:cell wall organization|GO:0009507:chloroplast|GO:0005737:cytoplasm|GO:0005576:extracellular region|GO:0010154:fruit development|GO:0009740:gib…
PM01G01080	0.84	0.2	0.16	0.18	0.62	0.35	0	0.17
PM01G01090	10.33	9.28	9.2	9.08	7.45	7.96	6.39	7.57	GO:0009451:RNA modification|GO:0009507:chloroplast|GO:0009570:chloroplast stroma|GO:0019239:deaminase activity|GO:0008835:diaminohydroxyphosphoribosylaminopyrimidine deaminase activity|GO:0016787:hydrolase activity|GO:0055114:oxidation-reduction process|GO:0009231:riboflavin biosynthetic process|GO:0008270:zinc ion binding
PM01G01100	40.25	35.78	33.03	25.01	4.73	20.81	0.11	1.03	GO:0042802:identical protein binding|GO:0005779:integral component of peroxisomal membrane|GO:0003674:molecular_function|GO:0005778:peroxisomal membrane|GO:0005777:peroxisome|GO:0016559:peroxisome fission|GO:0007031:peroxisome organization|GO:0009506:plasmodesma|GO:0005515:protein binding|GO:0044375:regulation of peroxisome size
PM01G01110	3.15	3.49	3.75	2.53	1.72	2.96	1.43	0.22	GO:0005737:cytoplasm|GO:0005634:nucleus
PM01G01120	26.68	25.67	37.69	38.38	25.55	35.33	50.93	89.63	GO:0008150:biological_process|GO:0003674:molecular_function|GO:0005634:nucleus
PM01G01130	0.02	0.05	0.04	0.12	0.06	0.07	0.65	0.21	GO:0008150:biological_process|GO:0030246:carbohydrate binding|GO:0005634:nucleus|GO:0005515:protein binding|GO:0016567:protein ubiquitination|GO:0009611:response to wounding
PM01G01140	15.96	12.88	20.21	27.33	27.62	24.85	28.69	49.28	GO:0008180:COP9 signalosome|GO:0010388:cullin deneddylation
PM01G01150	6.05	2.32	0.26	0.5	12.98	2.7	9.01	0.37	GO:0016485:protein processing|GO:0004252:serine-type endopeptidase activity
PM01G01160	42.46	28.3	15.01	44.49	37.89	15.72	24.82	4.77	GO:0016787:hydrolase activity
PM01G01170	5.13	5.25	7.85	11.61	15.57	12.99	16.31	19.84	GO:0015450:P-P-bond-hydrolysis-driven protein transmembrane transporter activity|GO:0009060:aerobic respiration|GO:0008150:biological_process|GO:0005575:cellular_component|GO:0016021:integral component of membrane|GO:0032592:integral component of mitochondrial membrane|GO:0016020:membrane|GO:0005743:mitochondrial inner membrane|GO:0031966:mitochondrial membrane|GO:0033615:mitochondrial proton-tra…
PM01G01180	0.47	0.17	0	0.13	1.08	1.19	0.54	0.34	GO:0008150:biological_process|GO:0005575:cellular_component|GO:0009507:chloroplast|GO:0009941:chloroplast envelope|GO:0009706:chloroplast inner membrane|GO:0006952:defense response|GO:0005622:intracellular|GO:0003674:molecular_function|GO:0005634:nucleus|GO:0055114:oxidation-reduction process|GO:0016491:oxidoreductase activity|GO:0005886:plasma membrane|GO:0009860:pollen tube growth|GO:0015031:pr…
PM01G01190	12.68	7.74	5.71	3.08	4.46	4.38	3.89	2.42	GO:0010181:FMN binding|GO:0008150:biological_process|GO:0005737:cytoplasm|GO:0003674:molecular_function|GO:0005634:nucleus|GO:0055114:oxidation-reduction process|GO:0016491:oxidoreductase activity|GO:0008615:pyridoxine biosynthetic process
PM01G01200	6.17	9.17	7.59	9.88	13.6	10.25	8.96	3.19	GO:0005737:cytoplasm|GO:0050829:defense response to Gram-negative bacterium|GO:0005834:heterotrimeric G-protein complex|GO:0005634:nucleus|GO:0000159:protein phosphatase type 2A complex|GO:0008601:protein phosphatase type 2A regulator activity|GO:0004871:signal transducer activity|GO:0007165:signal transduction
PM01G01210	13.17	12.62	21.93	23.22	17.88	16.59	13.23	15.96	GO:0003723:RNA binding|GO:0008380:RNA splicing|GO:0008150:biological_process|GO:0005575:cellular_component|GO:0005737:cytoplasm|GO:0006397:mRNA processing|GO:0000398:mRNA splicing, via spliceosome|GO:0010445:nuclear dicing body|GO:0016607:nuclear speck|GO:0003676:nucleic acid binding|GO:0000166:nucleotide binding|GO:0005634:nucleus|GO:0031053:primary miRNA processing|GO:0005515:protein binding|GO…
PM01G01220	2.25	3.06	4.05	2.9	2.84	2.82	1.68	1.4	GO:0008150:biological_process|GO:0009507:chloroplast|GO:0009793:embryo development ending in seed dormancy|GO:0009553:embryo sac development|GO:0005739:mitochondrion|GO:0009295:nucleoid|GO:0009508:plastid chromosome|GO:0009555:pollen development|GO:0048868:pollen tube development|GO:0045893:positive regulation of transcription, DNA-templated|GO:0019843:rRNA binding|GO:0042793:transcription from p…
PM01G01230	1.44	4.69	4.13	6.24	4.22	3.16	5.61	4.26	GO:0005524:ATP binding|GO:0042352:GDP-L-fucose salvage|GO:0005975:carbohydrate metabolic process|GO:0005737:cytoplasm|GO:0005829:cytosol|GO:0050201:fucokinase activity|GO:0047341:fucose-1-phosphate guanylyltransferase activity|GO:0004335:galactokinase activity|GO:0016301:kinase activity|GO:0046872:metal ion binding|GO:0016310:phosphorylation|GO:0016773:phosphotransferase activity, alcohol group a…
PM01G01240	7.4	12.55	18.45	18.2	14.21	14.7	12.96	24.41	GO:0005524:ATP binding|GO:0042352:GDP-L-fucose salvage|GO:0005975:carbohydrate metabolic process|GO:0005737:cytoplasm|GO:0005829:cytosol|GO:0050201:fucokinase activity|GO:0047341:fucose-1-phosphate guanylyltransferase activity|GO:0004335:galactokinase activity|GO:0016301:kinase activity|GO:0008152:metabolic process|GO:0046872:metal ion binding|GO:0000166:nucleotide binding|GO:0016310:phosphorylat…
PM01G01250	6.36	1.76	0.01	0.27	8.94	0.69	3.74	0.39	GO:0031225:anchored component of membrane|GO:0046658:anchored component of plasma membrane|GO:0005507:copper ion binding|GO:0009055:electron carrier activity|GO:0005886:plasma membrane
PM01G01260	25.7	17.53	27.74	38.21	60.31	33.99	47.49	60.25	GO:0005524:ATP binding|GO:0042623:ATPase activity, coupled|GO:0007339:binding of sperm to zona pellucida|GO:0044297:cell body|GO:0042995:cell projection|GO:0005813:centrosome|GO:0051085:chaperone mediated protein folding requiring cofactor|GO:0005832:chaperonin-containing T-complex|GO:0005929:cilium|GO:0005737:cytoplasm|GO:0031122:cytoplasmic microtubule organization|GO:0005856:cytoskeleton|GO:00…
PM01G01270	12.68	8.98	11.83	16.77	17.48	9	35.19	4.18	GO:0031305:integral component of mitochondrial inner membrane|GO:0005744:mitochondrial inner membrane presequence translocase complex|GO:0015266:protein channel activity|GO:0030150:protein import into mitochondrial matrix
PM01G01280	15.51	12.77	5.44	10.51	55.05	48.58	21.58	7.69	GO:0005794:Golgi apparatus|GO:0008150:biological_process|GO:0009507:chloroplast|GO:0005768:endosome|GO:0016021:integral component of membrane|GO:0006811:ion transport|GO:0016020:membrane|GO:0003674:molecular_function|GO:0015098:molybdate ion transmembrane transporter activity|GO:0015689:molybdate ion transport|GO:0005886:plasma membrane|GO:0005515:protein binding|GO:0005802:trans-Golgi network|GO…
PM01G01290	2.21	1.22	0.93	0.4	0.85	0.31	5.02	1.35	GO:0005524:ATP binding|GO:0016887:ATPase activity|GO:0008219:cell death|GO:0031122:cytoplasmic microtubule organization|GO:0005783:endoplasmic reticulum|GO:0010154:fruit development|GO:0042802:identical protein binding|GO:0016021:integral component of membrane|GO:0008568:microtubule-severing ATPase activity|GO:0005740:mitochondrial envelope|GO:0031966:mitochondrial membrane|GO:0005741:mitochondri…
PM01G01300	12.62	19.11	30.6	27.23	22.05	20.08	13.17	15.35	GO:0005737:cytoplasm|GO:0004702:receptor signaling protein serine/threonine kinase activity
PM01G01310	5.57	2.59	11	8.54	6.32	6.77	5.97	8.56	GO:0003723:RNA binding|GO:0045111:intermediate filament cytoskeleton|GO:0043231:intracellular membrane-bounded organelle|GO:0005654:nucleoplasm|GO:0005634:nucleus|GO:0005515:protein binding|GO:0003743:translation initiation factor activity|GO:0006413:translational initiation
PM01G01320	0.99	6.04	41.36	9.29	1.71	2.15	0.31	0.79	GO:0005829:cytosol|GO:0030267:glyoxylate reductase (NADP) activity|GO:0016618:hydroxypyruvate reductase activity|GO:0016021:integral component of membrane|GO:0003674:molecular_function|GO:0080167:response to karrikin
PM01G01330	2.54	0.57	0.44	2.02	6.26	3.61	1.81	4.74	GO:0016887:ATPase activity|GO:0005871:kinesin complex|GO:0003777:microtubule motor activity|GO:0007018:microtubule-based movement
PM01G01340	4.09	0.54	3.26	2.43	0.5	0.43	4.18	0.54	GO:0008150:biological_process|GO:0005575:cellular_component|GO:0005739:mitochondrion|GO:0003674:molecular_function|GO:0005634:nucleus|GO:0009506:plasmodesma|GO:0009739:response to gibberellin
PM01G01350	4.59	23.05	24.28	23.91	17.52	19.48	16.71	11.88	GO:0003677:DNA binding|GO:0006352:DNA-templated transcription, initiation|GO:0000979:RNA polymerase II core promoter sequence-specific DNA binding|GO:0050681:androgen receptor binding|GO:0003289:atrial septum primum morphogenesis|GO:0003290:atrial septum secundum morphogenesis|GO:0060348:bone development|GO:0051216:cartilage development|GO:0003682:chromatin binding|GO:0005829:cytosol|GO:0048706:e…
PM01G01360	5.83	14.51	12.68	20.81	24.79	25.24	17.65	15.94	GO:0030122:AP-2 adaptor complex|GO:0016324:apical plasma membrane|GO:0016323:basolateral plasma membrane|GO:0008150:biological_process|GO:0005938:cell cortex|GO:0009992:cellular water homeostasis|GO:0030131:clathrin adaptor complex|GO:0030132:clathrin coat of coated pit|GO:0030136:clathrin-coated vesicle|GO:0005905:coated pit|GO:0000331:contractile vacuole|GO:0016023:cytoplasmic, membrane-bounded…
PM01G01370	1.94	4.29	5.67	8.71	7.4	7.8	8.06	20.99	GO:0008180:COP9 signalosome|GO:0080008:Cul4-RING E3 ubiquitin ligase complex|GO:0008150:biological_process|GO:0007049:cell cycle|GO:0007050:cell cycle arrest|GO:0005737:cytoplasm|GO:0005829:cytosol|GO:0032456:endocytic recycling|GO:0005768:endosome|GO:0008286:insulin receptor signaling pathway|GO:0043560:insulin receptor substrate binding|GO:0048009:insulin-like growth factor receptor signaling p…
PM01G01380	38.45	8.07	1.52	14.62	5.13	10.65	2.75	7.49	GO:0046916:cellular transition metal ion homeostasis|GO:0005737:cytoplasm|GO:0030001:metal ion transport|GO:0046914:transition metal ion binding
PM01G01390	40.16	25.09	15.14	27.39	79.54	68.13	16.68	2.21	GO:0003677:DNA binding|GO:0008150:biological_process|GO:0007267:cell-cell signaling|GO:0005737:cytoplasm|GO:0005634:nucleus|GO:0005886:plasma membrane|GO:0009506:plasmodesma|GO:0005515:protein binding|GO:0005773:vacuole
PM01G01400	7.98	9.58	10.49	19.13	13.34	19.49	24.71	7.52	GO:0005524:ATP binding|GO:0009058:biosynthetic process|GO:0007420:brain development|GO:0008283:cell proliferation|GO:0005575:cellular_component|GO:0009507:chloroplast|GO:0009570:chloroplast stroma|GO:0005737:cytoplasm|GO:0005829:cytosol|GO:0043652:engulfment of apoptotic cell|GO:0046655:folic acid metabolic process|GO:0009396:folic acid-containing compound biosynthetic process|GO:0006760:folic ac…
PM01G01410	0	0	0	0	0	0	0	0	GO:0009992:cellular water homeostasis|GO:0042807:central vacuole|GO:0015254:glycerol channel activity|GO:0005887:integral component of plasma membrane|GO:0034220:ion transmembrane transport|GO:0009705:plant-type vacuole membrane|GO:0015250:water channel activity
PM01G01420	6.42	4.38	9.26	13.88	14.51	12.3	11.14	23.48	GO:0043044:ATP-dependent chromatin remodeling|GO:0090544:BAF-type complex|GO:0006310:DNA recombination|GO:0006281:DNA repair|GO:0031011:Ino80 complex|GO:0035267:NuA4 histone acetyltransferase complex|GO:0000978:RNA polymerase II core promoter proximal region sequence-specific DNA binding|GO:0000980:RNA polymerase II distal enhancer sequence-specific DNA binding|GO:0016514:SWI/SNF complex|GO:00069…
PM01G01430	9.86	9.09	10.19	15.42	9.09	13.1	7.66	10.62	GO:0008150:biological_process|GO:0016998:cell wall macromolecule catabolic process|GO:0005575:cellular_component|GO:0003674:molecular_function|GO:0005634:nucleus
PM01G01440	1.4	0.11	0.01	0.33	0.68	1.37	0.06	0.08	GO:0003779:actin binding|GO:0005737:cytoplasm|GO:0005856:cytoskeleton|GO:0005789:endoplasmic reticulum membrane|GO:0005576:extracellular region|GO:0005739:mitochondrion|GO:0031965:nuclear membrane|GO:0005634:nucleus|GO:0005886:plasma membrane|GO:0005774:vacuolar membrane
PM01G01450	2.81	3.19	4.5	5.84	7.65	5.24	6.07	4.26	GO:0003677:DNA binding|GO:0003723:RNA binding|GO:0006405:RNA export from nucleus|GO:0006396:RNA processing|GO:0008380:RNA splicing|GO:0000347:THO complex|GO:0000445:THO complex part of transcription export complex|GO:0006915:apoptotic process|GO:0000781:chromosome, telomeric region|GO:0005737:cytoplasm|GO:0050832:defense response to fungus|GO:0031047:gene silencing by RNA|GO:0045171:intercellular…
PM01G01460	42.5	47.17	38.17	50.98	44.9	50.83	191.09	5.35	GO:0008150:biological_process|GO:0009507:chloroplast|GO:0016021:integral component of membrane|GO:0003674:molecular_function
PM01G01470	0	0	0	0	0.01	0	0	0	GO:0016929:SUMO-specific protease activity|GO:0004175:endopeptidase activity|GO:0005634:nucleus|GO:0016926:protein desumoylation
PM01G01480	26.11	16.51	12.7	2.52	0.2	6.3	0	0.01	GO:0005623:cell|GO:0009904:chloroplast accumulation movement|GO:0009903:chloroplast avoidance movement|GO:0005829:cytosol|GO:0005886:plasma membrane|GO:0005515:protein binding
PM01G01490	16.49	11.62	12.24	6.06	3.55	5.45	1.35	15.05	GO:0008150:biological_process|GO:0005739:mitochondrion|GO:0003674:molecular_function
PM01G01500	0.05	0	0.04	0.43	0.43	0.07	0.18	0.3
PM01G01510	5.88	5.4	3.52	9.74	28.48	11.09	6.89	1.44	GO:0003677:DNA binding|GO:0009943:adaxial/abaxial axis specification|GO:0009955:adaxial/abaxial pattern specification|GO:0043481:anthocyanin accumulation in tissues in response to UV light|GO:0030154:cell differentiation|GO:0048825:cotyledon development|GO:0042335:cuticle development|GO:0009855:determination of bilateral symmetry|GO:0048263:determination of dorsal identity|GO:0009880:embryonic pa…
PM01G01520	9.41	12.7	14.38	8.98	6.04	8.76	3.31	9.82	GO:0005524:ATP binding|GO:0004004:ATP-dependent RNA helicase activity|GO:0008026:ATP-dependent helicase activity|GO:0003723:RNA binding|GO:0003724:RNA helicase activity|GO:0010501:RNA secondary structure unwinding|GO:0006968:cellular defense response|GO:0071369:cellular response to ethylene stimulus|GO:0071395:cellular response to jasmonic acid stimulus|GO:0071446:cellular response to salicylic a…
PM01G01530	0.01	0.01	0.03	0.02	0.05	0.03	0.03	0.5	GO:0000124:SAGA complex|GO:0008150:biological_process|GO:0005575:cellular_component|GO:0016573:histone acetylation|GO:0016020:membrane|GO:0046873:metal ion transmembrane transporter activity|GO:0030001:metal ion transport|GO:0003674:molecular_function|GO:0006357:regulation of transcription from RNA polymerase II promoter|GO:0003712:transcription cofactor activity|GO:0055085:transmembrane transport
PM01G01540	2.35	5.39	7.24	7.53	9.11	8.23	3.47	3.43	GO:0016929:SUMO-specific protease activity|GO:0004175:endopeptidase activity|GO:0005634:nucleus|GO:0016926:protein desumoylation
PM01G01550	196.62	76.33	1.19	10.17	42.51	52.31	114.13	0.99	GO:0080064:4,4-dimethyl-9beta,19-cyclopropylsterol oxidation|GO:0080065:4-alpha-methyl-delta7-sterol oxidation|GO:0000254:C-4 methylsterol oxidase activity|GO:0003824:catalytic activity|GO:0009941:chloroplast envelope|GO:0009793:embryo development ending in seed dormancy|GO:0005783:endoplasmic reticulum|GO:0005789:endoplasmic reticulum membrane|GO:0006633:fatty acid biosynthetic process|GO:001602…
PM01G01560	1.58	1.85	9.07	7.42	5.22	4.2	4.53	13.84	GO:0006281:DNA repair|GO:0097371:MDM2/MDM4 family protein binding|GO:0008766:UDP-N-acetylmuramoylalanyl-D-glutamyl-2,6-diaminopimelate-D-alanyl-D-alanine ligase activity|GO:0006974:cellular response to DNA damage stimulus|GO:0043773:coenzyme F420-0 gamma-glutamyl ligase activity|GO:0043774:coenzyme F420-2 alpha-glutamyl ligase activity|GO:0005737:cytoplasm|GO:0016874:ligase activity|GO:0046872:me…
PM01G01570	4.81	5.75	6.15	9.05	8.2	6.16	8.15	3.3	GO:0047517:1,4-beta-D-xylan synthase activity|GO:0005794:Golgi apparatus|GO:0000139:Golgi membrane|GO:0035252:UDP-xylosyltransferase activity|GO:0008150:biological_process|GO:0003824:catalytic activity|GO:0042546:cell wall biogenesis|GO:0071555:cell wall organization|GO:0005768:endosome|GO:0005576:extracellular region|GO:0015020:glucuronosyltransferase activity|GO:0010417:glucuronoxylan biosynthe…
PM01G01580	0.59	0.19	0.29	0.33	0.79	0.39	0.09	0.26	GO:0008150:biological_process|GO:0005575:cellular_component|GO:0009507:chloroplast|GO:0009941:chloroplast envelope|GO:0003674:molecular_function
PM01G01590	0.42	0.11	0	0.01	0.63	0.01	0.11	0.88	GO:0005737:cytoplasm|GO:0009966:regulation of signal transduction|GO:0004842:ubiquitin-protein transferase activity
PM01G01600	3.53	9.07	11.51	18.72	21.51	17.39	4.4	5.56	GO:0008150:biological_process|GO:0005575:cellular_component|GO:0009507:chloroplast|GO:0005737:cytoplasm|GO:0003674:molecular_function|GO:0005634:nucleus|GO:0005773:vacuole
PM01G01610	1.5	0.45	0.01	1.67	102.39	0.8	83.48	0.02	GO:0098656:anion transmembrane transport|GO:0016021:integral component of membrane|GO:0005215:transporter activity
PM01G01620	0	0	0	0	0.07	0	0	0.44
PM01G01630	4.46	5.6	7.67	6.64	6.14	6.34	4.3	7.74	GO:0031467:Cul7-RING ubiquitin ligase complex|GO:0019005:SCF ubiquitin ligase complex|GO:0031146:SCF-dependent proteasomal ubiquitin-dependent protein catabolic process|GO:0009734:auxin-activated signaling pathway|GO:0005938:cell cortex|GO:0007059:chromosome segregation|GO:0005737:cytoplasm|GO:0005829:cytosol|GO:0009873:ethylene-activated signaling pathway|GO:0044351:macropinocytosis|GO:0007140:m…
PM01G01640	0	0	0	0	0	0	0	0
PM01G01650	8.76	15.1	21.2	30.89	37.38	25.38	17.64	8.96	GO:0005089:Rho guanyl-nucleotide exchange factor activity|GO:0030479:actin cortical patch|GO:0000147:actin cortical patch assembly|GO:0005509:calcium ion binding|GO:0005938:cell cortex|GO:0030054:cell junction|GO:0042995:cell projection|GO:0005905:coated pit|GO:0005829:cytosol|GO:0030139:endocytic vesicle|GO:0006897:endocytosis|GO:0048013:ephrin receptor signaling pathway|GO:0070062:extracellular…
PM01G01660	4.16	1.31	6.09	5.44	4.37	3.05	5.26	10.32	GO:0005524:ATP binding|GO:0004017:adenylate kinase activity|GO:0008652:cellular amino acid biosynthetic process|GO:0009507:chloroplast|GO:0009570:chloroplast stroma|GO:0005737:cytoplasm|GO:0005759:mitochondrial matrix|GO:0005739:mitochondrion|GO:0006139:nucleobase-containing compound metabolic process|GO:0015949:nucleobase-containing small molecule interconversion|GO:0046899:nucleoside triphospha…
PM01G01670	0.05	0.03	0	0	0.13	0	0	0.82
PM01G01680	18.33	3.12	0.28	0.78	13.44	0.32	3.51	42.74	GO:0005618:cell wall|GO:0006952:defense response|GO:0050829:defense response to Gram-negative bacterium|GO:0050832:defense response to fungus|GO:0005576:extracellular region|GO:0031640:killing of cells of other organism|GO:0030414:peptidase inhibitor activity|GO:0009505:plant-type cell wall|GO:0005886:plasma membrane|GO:0009506:plasmodesma
PM01G01690	1.53	0.87	0.08	2.25	3.87	0.27	2.27	0	GO:0016208:AMP binding|GO:0006083:acetate metabolic process|GO:0003987:acetate-CoA ligase activity|GO:0018858:benzoate-CoA ligase activity|GO:0019605:butyrate metabolic process|GO:0047760:butyrate-CoA ligase activity|GO:0003824:catalytic activity|GO:0009507:chloroplast|GO:0006952:defense response|GO:0006631:fatty acid metabolic process|GO:0019761:glucosinolate biosynthetic process|GO:0006097:glyo…
PM01G01700	0	0	0	0	0	0.06	0	0	GO:0001046:core promoter sequence-specific DNA binding|GO:0005634:nucleus|GO:0006366:transcription from RNA polymerase II promoter|GO:0001228:transcriptional activator activity, RNA polymerase II transcription regulatory region sequence-specific binding
PM01G01710	8.45	3.81	2.38	3.07	5.1	4.26	8.4	3.38	GO:0008137:NADH dehydrogenase (ubiquinone) activity|GO:0003954:NADH dehydrogenase activity|GO:0003995:acyl-CoA dehydrogenase activity|GO:0008150:biological_process|GO:0009507:chloroplast|GO:0009055:electron carrier activity|GO:0033539:fatty acid beta-oxidation using acyl-CoA dehydrogenase|GO:0000062:fatty-acyl-CoA binding|GO:0050660:flavin adenine dinucleotide binding|GO:0055088:lipid homeostasis…
PM01G01720	1.31	0.03	0	0.11	1.29	0.02	0	0.04	GO:0003677:DNA binding|GO:0005634:nucleus|GO:0006355:regulation of transcription, DNA-templated|GO:0003700:transcription factor activity, sequence-specific DNA binding|GO:0044212:transcription regulatory region DNA binding|GO:0006351:transcription, DNA-templated|GO:0016740:transferase activity
PM01G01730	0	0	0	0	0	0.15	0	0.02	GO:1902600:hydrogen ion transmembrane transport|GO:0008553:hydrogen-exporting ATPase activity, phosphorylative mechanism|GO:0005887:integral component of plasma membrane|GO:0043231:intracellular membrane-bounded organelle|GO:0051453:regulation of intracellular pH
PM01G01740	0.02	0.03	0.21	0.12	0.19	0.22	0	0.02	GO:0005794:Golgi apparatus|GO:0008150:biological_process|GO:0042546:cell wall biogenesis|GO:0009507:chloroplast|GO:0009543:chloroplast thylakoid lumen|GO:0005737:cytoplasm|GO:0005576:extracellular region|GO:0016021:integral component of membrane|GO:0003674:molecular_function|GO:0016740:transferase activity|GO:0016757:transferase activity, transferring glycosyl groups
PM01G01750	9.29	10.76	12.78	8.21	5.5	8.41	4.64	11.42	GO:0006499:N-terminal protein myristoylation|GO:0048046:apoplast|GO:0005737:cytoplasm|GO:0005829:cytosol|GO:0000287:magnesium ion binding|GO:0030145:manganese ion binding|GO:0016020:membrane|GO:0046872:metal ion binding|GO:0005739:mitochondrion|GO:0043124:negative regulation of I-kappaB kinase/NF-kappaB signaling|GO:0042347:negative regulation of NF-kappaB import into nucleus|GO:0050687:negative …
PM01G01760	568.05	473.45	338.2	100.6	46.01	138.93	0.06	0.44	GO:0051287:NAD binding|GO:0050661:NADP binding|GO:0080144:amino acid homeostasis|GO:0048658:anther wall tapetum development|GO:0048046:apoplast|GO:0005975:carbohydrate metabolic process|GO:0009507:chloroplast|GO:0009941:chloroplast envelope|GO:0031969:chloroplast membrane|GO:0009570:chloroplast stroma|GO:0009535:chloroplast thylakoid membrane|GO:0005507:copper ion binding|GO:0005737:cytoplasm|GO:…
PM01G01770	1.09	1	1.04	2.15	2.19	2.64	4.56	19.42	GO:0000175:3'-5'-exoribonuclease activity|GO:0071034:CUT catabolic process|GO:0090503:RNA phosphodiester bond hydrolysis, exonucleolytic|GO:0000177:cytoplasmic exosome (RNase complex)|GO:0004519:endonuclease activity|GO:0005085:guanyl-nucleotide exchange factor activity|GO:0006402:mRNA catabolic process|GO:0016020:membrane|GO:0000176:nuclear exosome (RNase complex)|GO:0005654:nucleoplasm|GO:00435…
PM01G01780	0.04	0.13	0.14	0.13	0.01	0.06	0	30.42	GO:0009926:auxin polar transport|GO:0009672:auxin:proton symporter activity|GO:0009507:chloroplast|GO:0016021:integral component of membrane|GO:0055085:transmembrane transport
PM01G01790	14.18	11.56	17.05	28.81	41.86	34.86	32.18	18.59	GO:0005794:Golgi apparatus|GO:0009507:chloroplast|GO:0004579:dolichyl-diphosphooligosaccharide-protein glycotransferase activity|GO:0005783:endoplasmic reticulum|GO:0016021:integral component of membrane|GO:0016020:membrane|GO:0004576:oligosaccharyl transferase activity|GO:0008250:oligosaccharyltransferase complex|GO:0018279:protein N-linked glycosylation via asparagine
PM01G01800	3.59	2.16	3.2	4.75	3.47	0.52	1.22	6.21	GO:0070417:cellular response to cold|GO:0009507:chloroplast|GO:0006952:defense response|GO:0016021:integral component of membrane|GO:0005634:nucleus|GO:0005886:plasma membrane|GO:0043161:proteasome-mediated ubiquitin-dependent protein catabolic process|GO:0016567:protein ubiquitination|GO:0009909:regulation of flower development|GO:0010966:regulation of phosphate transport|GO:0010200:response to …
PM01G01810	25.39	19.03	11.79	5.45	1.31	2.09	0	0.12	GO:0008150:biological_process|GO:0009507:chloroplast|GO:0003674:molecular_function
PM01G01820	25.69	33.62	20.77	12.45	38.83	52.34	18.97	30.99	GO:0005524:ATP binding|GO:0009738:abscisic acid-activated signaling pathway|GO:0005509:calcium ion binding|GO:0009931:calcium-dependent protein serine/threonine kinase activity|GO:0005516:calmodulin binding|GO:0004683:calmodulin-dependent protein kinase activity|GO:0005737:cytoplasm|GO:0005829:cytosol|GO:0035556:intracellular signal transduction|GO:0016301:kinase activity|GO:0016020:membrane|GO:0…
PM01G01830	4.75	6.19	15.64	21.34	22.8	17.85	16.98	30.49	GO:0003723:RNA binding|GO:0009507:chloroplast|GO:0005829:cytosol|GO:0000398:mRNA splicing, via spliceosome|GO:0003676:nucleic acid binding|GO:0005634:nucleus|GO:0048481:plant ovule development|GO:0009506:plasmodesma|GO:0009555:pollen development|GO:0009846:pollen germination
PM01G01840	2.29	0.96	0.95	1.22	2.48	1.74	1.91	2.03	GO:0003677:DNA binding|GO:0071897:DNA biosynthetic process|GO:0042769:DNA damage response, detection of DNA damage|GO:0006260:DNA replication|GO:0006271:DNA strand elongation involved in DNA replication|GO:0006261:DNA-dependent DNA replication|GO:0003887:DNA-directed DNA polymerase activity|GO:0043625:delta DNA polymerase complex|GO:0006298:mismatch repair|GO:0005654:nucleoplasm|GO:0006297:nucleo…
PM01G01850	20.69	7.57	15.05	3.07	3.5	5.31	2.23	0.48
PM01G01860	6.2	0.34	0.01	0.11	3.69	0.21	4.97	0	GO:0008150:biological_process|GO:0003674:molecular_function|GO:0005634:nucleus
PM01G01870	12.42	31.61	117.93	74.61	28.22	43.57	53.28	4.9	GO:0006075:(1->3)-beta-D-glucan biosynthetic process|GO:0003843:1,3-beta-D-glucan synthase activity|GO:0000148:1,3-beta-D-glucan synthase complex|GO:0005794:Golgi apparatus|GO:0005826:actomyosin contractile ring|GO:0030476:ascospore wall assembly|GO:0000935:barrier septum|GO:0051274:beta-glucan biosynthetic process|GO:0032153:cell division site|GO:0009504:cell plate|GO:0051286:cell tip|GO:0071555…
PM01G01880	4.65	10.07	13.44	8.71	5.46	6.45	4.16	7.51
PM01G01890	33.81	23.68	0.33	3.24	33.55	6.14	17.3	0.02	GO:0005794:Golgi apparatus|GO:0009738:abscisic acid-activated signaling pathway|GO:0031225:anchored component of membrane|GO:0046658:anchored component of plasma membrane|GO:0048046:apoplast|GO:0007155:cell adhesion|GO:0005618:cell wall|GO:0009897:external side of plasma membrane|GO:0016020:membrane|GO:0003674:molecular_function|GO:0010192:mucilage biosynthetic process|GO:0048354:mucilage biosynt…
PM01G01900	15.83	11.78	5.74	11.46	28.21	21.61	26.97	41.01	GO:0003735:structural constituent of ribosome|GO:0006412:translation
PM01G01910	35.7	31.66	28.13	53.34	57.06	50.04	38.02	62.78	GO:0005471:ATP:ADP antiporter activity|GO:0009941:chloroplast envelope|GO:0016021:integral component of membrane|GO:0016020:membrane|GO:0005743:mitochondrial inner membrane|GO:0006839:mitochondrial transport|GO:0005739:mitochondrion|GO:0015865:purine nucleotide transport|GO:0003735:structural constituent of ribosome|GO:0006412:translation|GO:0055085:transmembrane transport|GO:0006810:transport
PM01G01920	1.97	0.9	0.22	1	8.73	7.11	2.06	0.11
PM01G01930	1.3	0.44	1.44	0.67	1.17	0.94	1.48	1.8	GO:0005524:ATP binding|GO:0008150:biological_process|GO:0016311:dephosphorylation|GO:0070062:extracellular exosome|GO:0016787:hydrolase activity|GO:0016020:membrane|GO:0017111:nucleoside-triphosphatase activity|GO:0000166:nucleotide binding|GO:0098519:nucleotide phosphatase activity, acting on free nucleotides|GO:0005634:nucleus|GO:0044822:poly(A) RNA binding
PM01G01940	6.23	7.18	11.91	8.75	9.39	10.73	6.51	4.94	GO:0003677:DNA binding|GO:0070776:MOZ/MORF histone acetyltransferase complex|GO:0008150:biological_process|GO:0005829:cytosol|GO:0005576:extracellular region|GO:0043966:histone H3 acetylation|GO:0005634:nucleus|GO:0009506:plasmodesma|GO:0002576:platelet degranulation|GO:0005515:protein binding|GO:0008270:zinc ion binding
PM01G01950	4.56	4.07	3.27	7.89	5.92	10.05	1.84	0.4	GO:0005524:ATP binding|GO:0009742:brassinosteroid mediated signaling pathway|GO:0009507:chloroplast|GO:0006952:defense response|GO:0042742:defense response to bacterium|GO:0009816:defense response to bacterium, incompatible interaction|GO:0045087:innate immune response|GO:0016301:kinase activity|GO:0005634:nucleus|GO:0002221:pattern recognition receptor signaling pathway|GO:0016310:phosphorylatio…
PM01G01960	1.38	2.26	0.92	2.05	0.39	0.19	8.61	0.03	GO:0005524:ATP binding|GO:0009507:chloroplast|GO:0005737:cytoplasm|GO:0050832:defense response to fungus|GO:0016021:integral component of membrane|GO:0016301:kinase activity|GO:0005730:nucleolus|GO:0005634:nucleus|GO:0052033:pathogen-associated molecular pattern dependent induction by symbiont of host innate immune response|GO:0016310:phosphorylation|GO:0005886:plasma membrane|GO:0046777:protein …
PM01G01970	9.42	14.48	31.38	31.21	17.58	15.19	26.39	14.57	GO:0003677:DNA binding|GO:0000977:RNA polymerase II regulatory region sequence-specific DNA binding|GO:0042128:nitrate assimilation|GO:0009877:nodulation|GO:0005634:nucleus|GO:0006357:regulation of transcription from RNA polymerase II promoter|GO:0006355:regulation of transcription, DNA-templated|GO:0010167:response to nitrate|GO:0009414:response to water deprivation|GO:0010118:stomatal movement|…
PM01G01980	27.49	18.64	13.77	2.68	0.1	3.5	0.24	0.29	GO:0004096:catalase activity|GO:0008219:cell death|GO:0045454:cell redox homeostasis|GO:0006995:cellular response to nitrogen starvation|GO:0016036:cellular response to phosphate starvation|GO:0009970:cellular response to sulfate starvation|GO:0009507:chloroplast|GO:0050897:cobalt ion binding|GO:0005737:cytoplasm|GO:0005829:cytosol|GO:0022626:cytosolic ribosome|GO:0009514:glyoxysome|GO:0020037:he…
PM01G01990	26.06	27.57	32.85	37.93	35.86	37.43	37.32	29.73	GO:0030433:ER-associated ubiquitin-dependent protein catabolic process|GO:0035973:aggrephagy|GO:0016235:aggresome|GO:0005776:autophagosome|GO:0000045:autophagosome assembly|GO:0097352:autophagosome maturation|GO:0006914:autophagy|GO:0071456:cellular response to hypoxia|GO:0005737:cytoplasm|GO:0031410:cytoplasmic vesicle|GO:0005829:cytosol|GO:0005783:endoplasmic reticulum|GO:0042802:identical prot…
PM01G02000	1.2	2.08	3.49	6.04	4.98	3.56	4.74	10.83	GO:0003723:RNA binding|GO:0006401:RNA catabolic process|GO:0006396:RNA processing|GO:0009507:chloroplast|GO:0006378:mRNA polyadenylation|GO:0005739:mitochondrion|GO:0000166:nucleotide binding|GO:0016779:nucleotidyltransferase activity|GO:0006276:plasmid maintenance|GO:0009506:plasmodesma|GO:0004652:polynucleotide adenylyltransferase activity
PM01G02010	14.05	14.57	12.38	9.35	5.68	6.17	5.02	4.78	GO:0003955:NAD(P)H dehydrogenase (quinone) activity|GO:0009507:chloroplast|GO:0009535:chloroplast thylakoid membrane|GO:0016021:integral component of membrane|GO:0055114:oxidation-reduction process|GO:0010207:photosystem II assembly|GO:0009536:plastid|GO:0005515:protein binding|GO:0048038:quinone binding
PM01G02020	12.9	1.01	0.7	0.22	0.5	0.7	0	0.17	GO:0008150:biological_process|GO:0007049:cell cycle|GO:0051301:cell division|GO:0005737:cytoplasm|GO:0005856:cytoskeleton|GO:0005815:microtubule organizing center|GO:0030496:midbody|GO:0003674:molecular_function|GO:0005886:plasma membrane|GO:0044822:poly(A) RNA binding
PM01G02030	11.6	15.22	2.88	0.6	1.72	3.14	0.04	0.01	GO:0043293:apoptosome|GO:0097190:apoptotic signaling pathway|GO:0008150:biological_process|GO:0005623:cell|GO:0009507:chloroplast|GO:0009941:chloroplast envelope|GO:0009570:chloroplast stroma|GO:0009535:chloroplast thylakoid membrane|GO:0005737:cytoplasm|GO:0005856:cytoskeleton|GO:0005829:cytosol|GO:0070062:extracellular exosome|GO:0042802:identical protein binding|GO:0005622:intracellular|GO:000…
PM01G02040	0.47	2.99	0.52	0.38	0.21	1.1	0.49	0.04	GO:0016207:4-coumarate-CoA ligase activity|GO:0005524:ATP binding|GO:0016405:CoA-ligase activity|GO:0009851:auxin biosynthetic process|GO:0009850:auxin metabolic process|GO:0009507:chloroplast|GO:0005737:cytoplasm|GO:0050832:defense response to fungus|GO:0005783:endoplasmic reticulum|GO:0046949:fatty-acyl-CoA biosynthetic process|GO:0004321:fatty-acyl-CoA synthase activity|GO:0016021:integral com…
PM01G02050	30.98	13.08	5.16	19.39	16.73	6.76	9.48	2.53	GO:0016020:membrane|GO:0009505:plant-type cell wall|GO:0009506:plasmodesma
PM01G02060	0.58	0.04	0	0.05	0.03	0.09	0.04	0	GO:0008150:biological_process|GO:0009507:chloroplast|GO:0003674:molecular_function|GO:0005634:nucleus
PM01G02070	10.43	33.92	22.1	19.02	12.06	16.31	17.71	20.72	GO:0005524:ATP binding|GO:0009742:brassinosteroid mediated signaling pathway|GO:0016301:kinase activity|GO:0016020:membrane|GO:0005886:plasma membrane|GO:0009506:plasmodesma|GO:0005515:protein binding|GO:0004672:protein kinase activity|GO:0006468:protein phosphorylation|GO:0004674:protein serine/threonine kinase activity|GO:0009737:response to abscisic acid|GO:0005773:vacuole
PM01G02080	74	41.29	2.1	4.68	2.19	16.23	34.31	702.29	GO:0006040:amino sugar metabolic process|GO:0016231:beta-N-acetylglucosaminidase activity|GO:0005975:carbohydrate metabolic process|GO:0005618:cell wall|GO:0016998:cell wall macromolecule catabolic process|GO:0008061:chitin binding|GO:0006032:chitin catabolic process|GO:0004568:chitinase activity|GO:0050832:defense response to fungus|GO:0002213:defense response to insect|GO:0008843:endochitinase …
PM01G02090	11.31	7.81	3.56	11.04	2.3	2.42	0.5	0.11	GO:0003677:DNA binding|GO:0009718:anthocyanin-containing compound biosynthetic process|GO:0010120:camalexin biosynthetic process|GO:0071555:cell wall organization|GO:0071365:cellular response to auxin stimulus|GO:0005737:cytoplasm|GO:0050832:defense response to fungus|GO:0009908:flower development|GO:0042538:hyperosmotic salinity response|GO:0042802:identical protein binding|GO:0048281:infloresce…
PM01G02100	0.11	0.03	0.07	0.02	0	0.02	0	1.46
PM01G02110	2.81	0.37	0.02	0.09	0.22	0.11	0	163.54	GO:0008150:biological_process|GO:0003674:molecular_function|GO:0005634:nucleus
PM01G02120	20.68	12.77	1.49	1.92	5.24	3.74	0.5	1.38	GO:0008150:biological_process|GO:0005575:cellular_component|GO:0009507:chloroplast|GO:0009570:chloroplast stroma|GO:0003674:molecular_function
PM01G02130	0.63	0.18	0.08	0.11	0.13	0.17	1.75	0.28	GO:0016208:AMP binding|GO:0006083:acetate metabolic process|GO:0003987:acetate-CoA ligase activity|GO:0008150:biological_process|GO:0019605:butyrate metabolic process|GO:0047760:butyrate-CoA ligase activity|GO:0003824:catalytic activity|GO:0006631:fatty acid metabolic process|GO:0006097:glyoxylate cycle|GO:0016874:ligase activity|GO:0008152:metabolic process|GO:0005739:mitochondrion|GO:0005777:pe…
PM01G02140	0.02	0	0	0	0	0	1.47	0.17	GO:0016208:AMP binding|GO:0018858:benzoate-CoA ligase activity|GO:0008150:biological_process|GO:0019605:butyrate metabolic process|GO:0047760:butyrate-CoA ligase activity|GO:0003824:catalytic activity|GO:0009507:chloroplast|GO:0006952:defense response|GO:0006631:fatty acid metabolic process|GO:0019761:glucosinolate biosynthetic process|GO:0016874:ligase activity|GO:0008152:metabolic process|GO:00…
PM01G02150	1.21	0.59	0.63	0.52	0.72	0.25	0.79	0.27
PM01G02160	3.42	1.22	1.45	1.33	3.31	2.73	2.89	0.29	GO:0016208:AMP binding|GO:0006083:acetate metabolic process|GO:0003987:acetate-CoA ligase activity|GO:0008150:biological_process|GO:0019605:butyrate metabolic process|GO:0047760:butyrate-CoA ligase activity|GO:0003824:catalytic activity|GO:0009507:chloroplast|GO:0006631:fatty acid metabolic process|GO:0006097:glyoxylate cycle|GO:0016874:ligase activity|GO:0008152:metabolic process|GO:0005739:mito…
PM01G02170	7.2	7.97	3.18	4.48	4.06	5.97	4.04	59.47	GO:0016407:acetyltransferase activity|GO:0008652:cellular amino acid biosynthetic process|GO:0009970:cellular response to sulfate starvation|GO:0009507:chloroplast|GO:0019344:cysteine biosynthetic process|GO:0006535:cysteine biosynthetic process from serine|GO:0005737:cytoplasm|GO:0005829:cytosol|GO:0005739:mitochondrion|GO:0005634:nucleus|GO:0005515:protein binding|GO:0046686:response to cadmium…
PM01G02180	2.78	2.34	0.81	1.51	3.08	1.66	6.5	1.36	GO:0003879:ATP phosphoribosyltransferase activity|GO:0009507:chloroplast|GO:0009570:chloroplast stroma|GO:0000105:histidine biosynthetic process|GO:0000287:magnesium ion binding
PM01G02190	5.86	0.14	0	0.03	0.62	1.04	16.14	0.01	GO:0009507:chloroplast|GO:0020037:heme binding|GO:0016021:integral component of membrane|GO:0005506:iron ion binding|GO:0016020:membrane|GO:0055114:oxidation-reduction process|GO:0016709:oxidoreductase activity, acting on paired donors, with incorporation or reduction of molecular oxygen, NAD(P)H as one donor, and incorporation of one atom of oxygen|GO:0019825:oxygen binding|GO:0040008:regulation…
PM01G02200	0.21	0	0	0	0.02	0	0.64	0	GO:0008150:biological_process|GO:0005516:calmodulin binding|GO:0005737:cytoplasm|GO:0005829:cytosol|GO:0005875:microtubule associated complex|GO:0003674:molecular_function|GO:0005634:nucleus|GO:0005886:plasma membrane|GO:0005773:vacuole
PM01G02210	29.73	8.8	0.03	0.2	88.21	1.39	5.04	0.44	GO:0005737:cytoplasm|GO:0006749:glutathione metabolic process|GO:0004364:glutathione transferase activity
PM01G02220	34.31	5.96	0.04	0.14	86.41	2.98	8.65	0.36	GO:0005737:cytoplasm|GO:0006749:glutathione metabolic process|GO:0004364:glutathione transferase activity
PM01G02230	10.11	6.2	7.76	12.47	14.58	12.02	11.92	10.15	GO:0019005:SCF ubiquitin ligase complex|GO:0031146:SCF-dependent proteasomal ubiquitin-dependent protein catabolic process|GO:0001662:behavioral fear response|GO:0005575:cellular_component|GO:0005737:cytoplasm|GO:0016020:membrane|GO:0036312:phosphatidylinositol 3-kinase regulatory subunit binding|GO:0005515:protein binding|GO:0006513:protein monoubiquitination|GO:0019903:protein phosphatase bindi…
PM01G02240	0.91	0.44	1.79	0.98	0.6	1.14	1.72	0.12
PM01G02250	5.29	7.55	6.91	6.68	3	5.58	2.1	9.37	GO:0032580:Golgi cisterna membrane|GO:0000139:Golgi membrane|GO:0007030:Golgi organization|GO:0017137:Rab GTPase binding|GO:0048365:Rac GTPase binding|GO:0007049:cell cycle|GO:0009507:chloroplast|GO:0005737:cytoplasm|GO:0009793:embryo development ending in seed dormancy|GO:0005783:endoplasmic reticulum|GO:0016874:ligase activity|GO:0061025:membrane fusion|GO:0005634:nucleus|GO:0070936:protein K48…
PM01G02260	3.69	1.73	0.34	2.76	2.94	1.19	2.77	0.83	GO:0003677:DNA binding|GO:0000978:RNA polymerase II core promoter proximal region sequence-specific DNA binding|GO:0048658:anther wall tapetum development|GO:0009718:anthocyanin-containing compound biosynthetic process|GO:0043425:bHLH transcription factor binding|GO:0006952:defense response|GO:0007275:multicellular organism development|GO:0005634:nucleus|GO:0009555:pollen development|GO:0045893:p…
PM01G02270	109.26	64.51	27.53	46.05	126.62	53.31	81.46	46.79	GO:0030797:24-methylenesterol C-methyltransferase activity|GO:0005794:Golgi apparatus|GO:0008757:S-adenosylmethionine-dependent methyltransferase activity|GO:0005737:cytoplasm|GO:0005829:cytosol|GO:0005783:endoplasmic reticulum|GO:0032259:methylation|GO:0009825:multidimensional cell growth|GO:0032876:negative regulation of DNA endoreduplication|GO:0007389:pattern specification process|GO:0016126:…
PM01G02280	5.11	7.7	3.39	13.77	2.13	1.1	21.78	1.36	GO:0008150:biological_process|GO:0009507:chloroplast|GO:0003674:molecular_function|GO:0005634:nucleus|GO:0055114:oxidation-reduction process|GO:0033743:peptide-methionine (R)-S-oxide reductase activity|GO:0005886:plasma membrane
PM01G02290	0.09	0.08	0	0.09	0.03	0.04	0.14	0.17	GO:0031123:RNA 3'-end processing|GO:0003723:RNA binding|GO:0042868:antisense RNA metabolic process|GO:0048589:developmental growth|GO:0031047:gene silencing by RNA|GO:0003729:mRNA binding|GO:0005847:mRNA cleavage and polyadenylation specificity factor complex|GO:0045892:negative regulation of transcription, DNA-templated|GO:0000166:nucleotide binding|GO:0005634:nucleus|GO:0098789:pre-mRNA cleavag…
PM01G02300	5.43	1.61	0.98	0.92	1.79	0.8	2.71	0.25	GO:0003824:catalytic activity|GO:0005739:mitochondrion
PM01G02310	0.54	0.87	7.62	4.73	3.64	4.08	1.28	3.4	GO:0008150:biological_process|GO:0009507:chloroplast|GO:1900865:chloroplast RNA modification|GO:0031425:chloroplast RNA processing|GO:0004519:endonuclease activity|GO:0016556:mRNA modification|GO:0006397:mRNA processing|GO:1900864:mitochondrial RNA modification|GO:0005739:mitochondrion|GO:0003674:molecular_function|GO:0031426:polycistronic mRNA processing|GO:0008270:zinc ion binding
PM01G02320	13.49	17.77	9.98	12.34	20.05	31.53	33.03	9.03	GO:0051539:4 iron, 4 sulfur cluster binding|GO:0005524:ATP binding|GO:0005794:Golgi apparatus|GO:0003723:RNA binding|GO:0003994:aconitate hydratase activity|GO:0048046:apoplast|GO:0005618:cell wall|GO:0006879:cellular iron ion homeostasis|GO:0009507:chloroplast|GO:0009570:chloroplast stroma|GO:0006101:citrate metabolic process|GO:0005507:copper ion binding|GO:0005737:cytoplasm|GO:0005829:cytosol|…
PM01G02330	27.22	26.81	23.59	26.08	33.33	34.31	19.86	29.45	GO:0009507:chloroplast|GO:0005737:cytoplasm|GO:0046872:metal ion binding|GO:0005739:mitochondrion|GO:1900056:negative regulation of leaf senescence|GO:0005634:nucleus|GO:0016791:phosphatase activity|GO:0005886:plasma membrane|GO:0005515:protein binding|GO:0006470:protein dephosphorylation|GO:0004722:protein serine/threonine phosphatase activity
PM01G02340	37.98	26.82	78.67	38.19	15.53	17.31	10.77	8.86	GO:0008219:cell death|GO:0061077:chaperone-mediated protein folding|GO:0009507:chloroplast|GO:0009941:chloroplast envelope|GO:0009706:chloroplast inner membrane|GO:0009658:chloroplast organization|GO:0009570:chloroplast stroma|GO:0009534:chloroplast thylakoid|GO:0009535:chloroplast thylakoid membrane|GO:0009704:de-etiolation|GO:0009793:embryo development ending in seed dormancy|GO:0016021:integra…
PM01G02350	3.18	3.08	6.22	7.09	5.69	5.56	9.87	6.1	GO:0005623:cell|GO:0009507:chloroplast|GO:0016021:integral component of membrane|GO:0005622:intracellular|GO:0006811:ion transport|GO:0003674:molecular_function|GO:0006623:protein targeting to vacuole
PM01G02360	12.29	13.31	12.6	18.17	16.54	10.07	19.78	33.55	GO:0051027:DNA transport|GO:0005794:Golgi apparatus|GO:0016006:Nebenkern|GO:0009060:aerobic respiration|GO:0006820:anion transport|GO:0006915:apoptotic process|GO:0001662:behavioral fear response|GO:0036444:calcium ion transmembrane import into mitochondrion|GO:0045454:cell redox homeostasis|GO:0005618:cell wall|GO:0015267:channel activity|GO:0009507:chloroplast|GO:0009941:chloroplast envelope|GO…
PM01G02370	37.84	20.11	0.76	0.63	1.8	4.11	0.21	0.37	GO:0009507:chloroplast|GO:0016021:integral component of membrane|GO:0003674:molecular_function|GO:0005886:plasma membrane
PM01G02380	0.88	0.76	0.37	0.33	0.54	0.36	0.51	1	GO:0098655:cation transmembrane transport|GO:0072511:divalent inorganic cation transport|GO:0016021:integral component of membrane|GO:1903830:magnesium ion transmembrane transport|GO:0015095:magnesium ion transmembrane transporter activity|GO:0015693:magnesium ion transport|GO:0016020:membrane|GO:0046873:metal ion transmembrane transporter activity|GO:0030001:metal ion transport|GO:0005886:plasma…
PM01G02390	6.33	2.43	1.09	3.29	8.18	2.13	8.5	0.68	GO:0007050:cell cycle arrest|GO:0030332:cyclin binding|GO:0004861:cyclin-dependent protein serine/threonine kinase inhibitor activity|GO:0005737:cytoplasm|GO:0001673:male germ cell nucleus|GO:0045786:negative regulation of cell cycle|GO:0045736:negative regulation of cyclin-dependent protein serine/threonine kinase activity|GO:0005654:nucleoplasm|GO:0005634:nucleus|GO:0005515:protein binding
PM01G02400	7.62	22.58	23.95	24.55	14.2	34.54	27.66	8.62	GO:0008150:biological_process|GO:0005516:calmodulin binding|GO:0005623:cell|GO:0006879:cellular iron ion homeostasis|GO:0005737:cytoplasm|GO:0005829:cytosol|GO:0090002:establishment of protein localization to plasma membrane|GO:0030097:hemopoiesis|GO:0016020:membrane|GO:0005634:nucleus|GO:0046854:phosphatidylinositol phosphorylation|GO:0005886:plasma membrane|GO:0005515:protein binding
PM01G02410	7.4	11.21	27.33	27.97	26.5	21.47	10.91	10.71	GO:0003723:RNA binding|GO:0071004:U2-type prespliceosome|GO:0089701:U2AF|GO:0008150:biological_process|GO:0000243:commitment complex|GO:0016607:nuclear speck|GO:0000166:nucleotide binding|GO:0005634:nucleus|GO:0008187:poly-pyrimidine tract binding|GO:0030628:pre-mRNA 3'-splice site binding
PM01G02420	9.25	9.23	11.6	14.02	10.84	12.25	10.84	7.86
PM01G02430	9.71	0.95	0.27	1.9	10.96	2.69	1.26	0.32	GO:0008150:biological_process|GO:0003674:molecular_function|GO:0005634:nucleus
PM01G02440	0.01	0.01	0.04	0.02	0	4.42	0.05	0.06	GO:0008150:biological_process|GO:0009507:chloroplast|GO:0005739:mitochondrion|GO:0003674:molecular_function|GO:0005634:nucleus|GO:0009506:plasmodesma
PM01G02450	19.82	55.59	16.18	20.14	6.46	24.54	0.32	1.63	GO:0005794:Golgi apparatus|GO:0042742:defense response to bacterium|GO:0042938:dipeptide transport|GO:0042936:dipeptide transporter activity|GO:0015334:high-affinity oligopeptide transporter activity|GO:0042538:hyperosmotic salinity response|GO:0016021:integral component of membrane|GO:0016020:membrane|GO:0015112:nitrate transmembrane transporter activity|GO:0006807:nitrogen compound metabolic pr…
PM01G02460	3.16	2.94	2.3	0.72	0.56	0.7	0.28	0.61	GO:0008150:biological_process|GO:0009507:chloroplast|GO:0003674:molecular_function|GO:0009536:plastid
PM01G02470	130.42	34.87	38.79	57.3	81.04	66.12	83.27	94.31	GO:0009507:chloroplast|GO:0022625:cytosolic large ribosomal subunit|GO:0009793:embryo development ending in seed dormancy|GO:0070180:large ribosomal subunit rRNA binding|GO:0005730:nucleolus|GO:0005840:ribosome|GO:0003735:structural constituent of ribosome|GO:0006412:translation
PM01G02480	0.34	1.06	2.97	3.44	1.66	1.6	1.99	4.31
PM01G02490	6.59	10.68	17.93	19.69	21.14	14.31	13.98	8.48	GO:0008150:biological_process|GO:0009941:chloroplast envelope|GO:0005739:mitochondrion|GO:0003674:molecular_function|GO:0005634:nucleus|GO:0005886:plasma membrane|GO:0009506:plasmodesma|GO:0005773:vacuole
PM01G02500	3.36	5	10.24	4.89	2.79	1.89	5.75	1.62
PM01G02510	2.31	3.35	0.04	1.08	1.92	3.98	0	0.89	GO:0071555:cell wall organization|GO:0009507:chloroplast|GO:0005783:endoplasmic reticulum|GO:0005789:endoplasmic reticulum membrane|GO:0005576:extracellular region|GO:0020037:heme binding|GO:0016021:integral component of membrane|GO:0005506:iron ion binding|GO:0080133:midchain alkane hydroxylase activity|GO:0004497:monooxygenase activity|GO:0055114:oxidation-reduction process|GO:0016705:oxidoredu…
PM01G02520	34.51	59.49	11.07	47.09	24.99	49.24	0.08	45.88	GO:0071555:cell wall organization|GO:0005575:cellular_component|GO:0009507:chloroplast|GO:0005783:endoplasmic reticulum|GO:0005789:endoplasmic reticulum membrane|GO:0005576:extracellular region|GO:0020037:heme binding|GO:0016021:integral component of membrane|GO:0005506:iron ion binding|GO:0004497:monooxygenase activity|GO:0055114:oxidation-reduction process|GO:0016705:oxidoreductase activity, ac…
PM01G02530	0.03	0.24	0	0.3	0.24	0.32	0.2	0.09	GO:0019005:SCF ubiquitin ligase complex|GO:0031146:SCF-dependent proteasomal ubiquitin-dependent protein catabolic process|GO:0004842:ubiquitin-protein transferase activity
PM01G02540	1.46	0.34	0.19	0.43	0.99	0.74	0.95	0.05	GO:0019005:SCF ubiquitin ligase complex|GO:0031146:SCF-dependent proteasomal ubiquitin-dependent protein catabolic process|GO:0005576:extracellular region|GO:0016021:integral component of membrane|GO:0003674:molecular_function|GO:0009505:plant-type cell wall|GO:0009506:plasmodesma|GO:0010497:plasmodesmata-mediated intercellular transport|GO:0006810:transport|GO:0046739:transport of virus in multi…
PM01G02550	0.32	0.82	0.54	1.17	0.95	0.68	0.45	0.95	GO:0009451:RNA modification|GO:0008150:biological_process|GO:0009507:chloroplast|GO:0016554:cytidine to uridine editing|GO:0009793:embryo development ending in seed dormancy|GO:0019288:isopentenyl diphosphate biosynthetic process, methylerythritol 4-phosphate pathway|GO:0019287:isopentenyl diphosphate biosynthetic process, mevalonate pathway|GO:0005739:mitochondrion|GO:0003674:molecular_function|…
PM01G02560	44.54	142.58	4.27	6.68	6.75	7.07	0.26	2.05	GO:0006396:RNA processing|GO:0008150:biological_process|GO:0009507:chloroplast|GO:0016020:membrane|GO:0005634:nucleus|GO:0006979:response to oxidative stress
PM01G02570	2.73	2.44	4.56	5.1	3.61	3.53	6.76	6.02	GO:0043140:ATP-dependent 3'-5' DNA helicase activity|GO:0003677:DNA binding|GO:0032508:DNA duplex unwinding|GO:0006310:DNA recombination|GO:0006260:DNA replication|GO:0006284:base-excision repair|GO:0008150:biological_process|GO:0005694:chromosome|GO:0005737:cytoplasm|GO:0006302:double-strand break repair|GO:0009378:four-way junction helicase activity|GO:0003674:molecular_function|GO:0005634:nucl…
PM01G02580	13.3	8.88	6.69	12.58	10.22	14.17	9.76	20.42	GO:0022625:cytosolic large ribosomal subunit|GO:0005762:mitochondrial large ribosomal subunit|GO:0005739:mitochondrion|GO:0019843:rRNA binding|GO:0000027:ribosomal large subunit assembly|GO:0005840:ribosome|GO:0042254:ribosome biogenesis|GO:0003735:structural constituent of ribosome|GO:0006412:translation
PM01G02590	4.45	3.42	5.19	7.09	5.89	4.03	8.62	6.8	GO:0000506:glycosylphosphatidylinositol-N-acetylglucosaminyltransferase (GPI-GnT) complex|GO:0016021:integral component of membrane|GO:0005634:nucleus|GO:0016757:transferase activity, transferring glycosyl groups
PM01G02600	1.25	1.46	3.05	7.55	6.29	3.98	3.23	7.65	GO:0008150:biological_process|GO:0042742:defense response to bacterium|GO:0003674:molecular_function|GO:0005634:nucleus|GO:0009626:plant-type hypersensitive response
PM01G02610	186.74	57.89	35.91	70.35	119.4	87.3	129.87	432.78	GO:0022625:cytosolic large ribosomal subunit|GO:0003735:structural constituent of ribosome|GO:0006412:translation
PM01G02620	70.95	12.55	11.58	6.16	4.38	65.17	1.74	170.75	GO:0016161:beta-amylase activity|GO:0009507:chloroplast|GO:0009570:chloroplast stroma|GO:0005737:cytoplasm|GO:0005829:cytosol|GO:0005576:extracellular region|GO:0042802:identical protein binding|GO:0000024:maltose biosynthetic process|GO:0005634:nucleus|GO:0000272:polysaccharide catabolic process|GO:0048831:regulation of shoot system development|GO:0009409:response to cold|GO:0080027:response to …
PM01G02630	0.2	1.39	2.49	3.92	0.2	0.09	0.42	0.46	GO:0008150:biological_process|GO:0009507:chloroplast|GO:0016021:integral component of membrane|GO:0003674:molecular_function|GO:0005886:plasma membrane
PM01G02640	0.37	0.31	0.12	0.14	0.08	0.79	1.01	0	GO:0005680:anaphase-promoting complex|GO:0008150:biological_process|GO:0097602:cullin family protein binding|GO:0005576:extracellular region|GO:0005634:nucleus|GO:0005886:plasma membrane|GO:0009506:plasmodesma|GO:0010197:polar nucleus fusion|GO:0045842:positive regulation of mitotic metaphase/anaphase transition|GO:0042787:protein ubiquitination involved in ubiquitin-dependent protein catabolic p…
PM01G02650	1.51	1.78	5.51	4.42	4.45	3.35	6.12	2.48
PM01G02660	0.05	0.09	0.05	0.02	0.03	0.08	4.76	0	GO:0005680:anaphase-promoting complex|GO:0008150:biological_process|GO:0097602:cullin family protein binding|GO:0005576:extracellular region|GO:0003674:molecular_function|GO:0005634:nucleus|GO:0005886:plasma membrane|GO:0009506:plasmodesma|GO:0010197:polar nucleus fusion|GO:0045842:positive regulation of mitotic metaphase/anaphase transition|GO:0042787:protein ubiquitination involved in ubiquitin…
PM01G02670	2.38	9.79	22.64	28.55	1.72	4.66	2.54	8.36	GO:0005680:anaphase-promoting complex|GO:0008150:biological_process|GO:0097602:cullin family protein binding|GO:0005576:extracellular region|GO:0003674:molecular_function|GO:0005634:nucleus|GO:0005886:plasma membrane|GO:0009506:plasmodesma|GO:0010197:polar nucleus fusion|GO:0045842:positive regulation of mitotic metaphase/anaphase transition|GO:0042787:protein ubiquitination involved in ubiquitin…
PM01G02680	0.5	0	0	0.1	0.01	0.86	0.18	0.15	GO:0003677:DNA binding|GO:0009740:gibberellic acid mediated signaling pathway|GO:0009867:jasmonic acid mediated signaling pathway|GO:0005634:nucleus|GO:0009555:pollen development|GO:0090406:pollen tube|GO:0009789:positive regulation of abscisic acid-activated signaling pathway|GO:0043068:positive regulation of programmed cell death|GO:0045893:positive regulation of transcription, DNA-templated|GO…
PM01G02690	0.07	0	0.04	0.08	0	0.04	0	2.48	GO:0005737:cytoplasm|GO:0006749:glutathione metabolic process|GO:0004364:glutathione transferase activity
PM01G02700	8.84	16.57	7.57	23.87	28.83	34.06	67.73	91.18	GO:0005524:ATP binding|GO:0042626:ATPase activity, coupled to transmembrane movement of substances|GO:0005794:Golgi apparatus|GO:1901527:abscisic acid-activated signaling pathway involved in stomatal movement|GO:0048046:apoplast|GO:0016323:basolateral plasma membrane|GO:0030007:cellular potassium ion homeostasis|GO:0010290:chlorophyll catabolite transmembrane transporter activity|GO:0006855:drug …
PM01G02710	5.72	22.63	35.79	59.3	21.92	21.94	35.66	6.21	GO:0008150:biological_process|GO:0005575:cellular_component|GO:0009507:chloroplast|GO:0005576:extracellular region|GO:0016021:integral component of membrane|GO:0003674:molecular_function|GO:0005634:nucleus
PM01G02720	0.01	0.01	0.01	0.01	0	0.04	0.03	0	GO:0043531:ADP binding|GO:0005524:ATP binding|GO:0046034:ATP metabolic process|GO:0016887:ATPase activity|GO:1904288:BAT3 complex binding|GO:0006281:DNA repair|GO:0036513:Derlin-1 retrotranslocation complex|GO:0006888:ER to Golgi vesicle-mediated transport|GO:0071712:ER-associated misfolded protein catabolic process|GO:0030433:ER-associated ubiquitin-dependent protein catabolic process|GO:0036503…
PM01G02730	6.34	7.03	14.26	13.05	10.27	10.51	12.66	30.67	GO:0034933:1-hydroxy-6-methoxypyrene methyltransferase activity|GO:0034931:1-hydroxypyrene methyltransferase activity|GO:0018707:1-phenanthrol methyltransferase activity|GO:0052624:2-phytyl-1,4-naphthoquinone methyltransferase activity|GO:0008425:2-polyprenyl-6-methoxy-1,4-benzoquinone methyltransferase activity|GO:0034807:4,5-dihydroxybenzo(a)pyrene methyltransferase activity|GO:0008169:C-methyl…
PM01G02740	0.41	0.45	1.76	3.07	3.44	1.39	0.55	0.16	GO:0005618:cell wall|GO:0004252:serine-type endopeptidase activity
PM01G02750	1.72	2.34	3.7	2.27	2.49	2.86	3.27	8.27	GO:0005524:ATP binding|GO:0009507:chloroplast|GO:0009570:chloroplast stroma|GO:0042407:cristae formation|GO:0004817:cysteine-tRNA ligase activity|GO:0006423:cysteinyl-tRNA aminoacylation|GO:0005737:cytoplasm|GO:0005829:cytosol|GO:0046872:metal ion binding|GO:0005739:mitochondrion|GO:0010197:polar nucleus fusion|GO:0043067:regulation of programmed cell death
PM01G02760	0.44	0.14	0.08	0.39	1.33	1.04	0.49	1.11	GO:0005524:ATP binding|GO:0042623:ATPase activity, coupled|GO:0005794:Golgi apparatus|GO:0019954:asexual reproduction|GO:0051131:chaperone-mediated protein complex assembly|GO:0009507:chloroplast|GO:0009941:chloroplast envelope|GO:0009570:chloroplast stroma|GO:0005507:copper ion binding|GO:0005737:cytoplasm|GO:0005829:cytosol|GO:0022626:cytosolic ribosome|GO:0031101:fin regeneration|GO:0006954:in…
PM01G02770	14.69	8.72	19.49	15.4	13.09	14.79	9.33	13.1	GO:0003677:DNA binding|GO:0006260:DNA replication|GO:0070776:MOZ/MORF histone acetyltransferase complex|GO:0031152:aggregation involved in sorocarp development|GO:0003682:chromatin binding|GO:0016568:chromatin modification|GO:0043966:histone H3 acetylation|GO:0016573:histone acetylation|GO:0016570:histone modification|GO:0046872:metal ion binding|GO:0035064:methylated histone binding|GO:0008285:n…
PM01G02780	8.7	12.51	16.37	13.87	9.66	24.4	4.83	5.31	GO:0008150:biological_process|GO:0016020:membrane|GO:0003674:molecular_function|GO:0005634:nucleus|GO:0005886:plasma membrane
PM01G02790	2.91	3.21	5.85	8.48	7.67	7.89	4.49	10.47	GO:0005524:ATP binding|GO:0006310:DNA recombination|GO:0006281:DNA repair|GO:0031011:Ino80 complex|GO:0008150:biological_process|GO:0007049:cell cycle|GO:0051301:cell division|GO:0006974:cellular response to DNA damage stimulus|GO:0005575:cellular_component|GO:0005813:centrosome|GO:0006338:chromatin remodeling|GO:0005694:chromosome|GO:0005737:cytoplasm|GO:0007067:mitotic nuclear division|GO:00036…
PM01G02800	8.69	12.39	11.75	15.77	25.81	20.82	13.36	20.53	GO:0038096:Fc-gamma receptor signaling pathway involved in phagocytosis|GO:0048365:Rac GTPase binding|GO:0016601:Rac protein signal transduction|GO:0031209:SCAR complex|GO:0003779:actin binding|GO:0051015:actin filament binding|GO:0097202:activation of cysteine-type endopeptidase activity|GO:0006915:apoptotic process|GO:0048675:axon extension|GO:0007155:cell adhesion|GO:0030154:cell differentiati…
PM01G02810	1.18	0	0.02	0	0	0.05	3.94	0.02	GO:0048046:apoplast|GO:0009507:chloroplast|GO:0042349:guiding stereospecific synthesis activity|GO:0003674:molecular_function|GO:0009699:phenylpropanoid biosynthetic process
PM01G02820	0.33	0.07	0.33	0.36	0.78	0.54	0.59	1.4	GO:0005575:cellular_component
PM01G02830	0.05	0.02	0	0	0.02	0	0.16	0	GO:0005794:Golgi apparatus|GO:0032580:Golgi cisterna membrane|GO:0000139:Golgi membrane|GO:0008150:biological_process|GO:0005509:calcium ion binding|GO:0005544:calcium-dependent phospholipid binding|GO:0003824:catalytic activity|GO:0005618:cell wall|GO:0042546:cell wall biogenesis|GO:0010256:endomembrane system organization|GO:0005768:endosome|GO:0042353:fucose biosynthetic process|GO:0030173:int…
PM01G02840	0.36	0.18	0	0	0.02	0.07	2.17	0.23	GO:0005794:Golgi apparatus|GO:0032580:Golgi cisterna membrane|GO:0000139:Golgi membrane|GO:0008150:biological_process|GO:0003824:catalytic activity|GO:0005618:cell wall|GO:0042546:cell wall biogenesis|GO:0010256:endomembrane system organization|GO:0005768:endosome|GO:0042353:fucose biosynthetic process|GO:0008378:galactosyltransferase activity|GO:0030173:integral component of Golgi membrane|GO:00…
PM01G02850	9.52	6.64	1.55	4.53	17.72	14.91	7.38	12.63	GO:0005794:Golgi apparatus|GO:0032580:Golgi cisterna membrane|GO:0000139:Golgi membrane|GO:0008150:biological_process|GO:0003824:catalytic activity|GO:0005618:cell wall|GO:0042546:cell wall biogenesis|GO:0010256:endomembrane system organization|GO:0005768:endosome|GO:0042353:fucose biosynthetic process|GO:0008378:galactosyltransferase activity|GO:0030173:integral component of Golgi membrane|GO:00…
PM01G02860	2.22	2.35	2.99	1.89	2.64	2.02	1.4	1.21
PM01G02870	6.94	9.09	23.04	21.95	19.66	20.55	14.67	7.62	GO:0019005:SCF ubiquitin ligase complex|GO:0031146:SCF-dependent proteasomal ubiquitin-dependent protein catabolic process|GO:0008150:biological_process|GO:0005575:cellular_component|GO:0003674:molecular_function|GO:0004842:ubiquitin-protein transferase activity
PM01G02880	1.31	1.25	4.74	3.69	4.04	3.38	3.77	0.29	GO:0005524:ATP binding|GO:0048653:anther development|GO:0030154:cell differentiation|GO:0051301:cell division|GO:0048437:floral organ development|GO:0048229:gametophyte development|GO:0016021:integral component of membrane|GO:0016301:kinase activity|GO:0016020:membrane|GO:0010480:microsporocyte differentiation|GO:0007275:multicellular organism development|GO:0016310:phosphorylation|GO:0005886:pla…
PM01G02890	1.35	0.59	1.05	1.79	1.26	0.77	1.88	0.32	GO:0000977:RNA polymerase II regulatory region sequence-specific DNA binding|GO:0001085:RNA polymerase II transcription factor binding|GO:0030154:cell differentiation|GO:0003682:chromatin binding|GO:0005634:nucleus|GO:0006355:regulation of transcription, DNA-templated|GO:0003700:transcription factor activity, sequence-specific DNA binding|GO:0005667:transcription factor complex|GO:0001228:transcr…
PM01G02900	11.46	10.36	8.47	10.75	24.41	35.49	21.55	5.13	GO:0007186:G-protein coupled receptor signaling pathway|GO:0005794:Golgi apparatus|GO:0000139:Golgi membrane|GO:0008375:acetylglucosaminyltransferase activity|GO:0016051:carbohydrate biosynthetic process|GO:0016049:cell growth|GO:0015020:glucuronosyltransferase activity|GO:0016021:integral component of membrane|GO:0018153:isopeptide cross-linking via N6-(L-isoglutamyl)-L-lysine|GO:0016020:membran…
PM01G02910	0.47	1.47	0.91	0.54	0	0.21	0.5	0.14	GO:0008194:UDP-glycosyltransferase activity|GO:0009813:flavonoid biosynthetic process|GO:0052696:flavonoid glucuronidation|GO:0043231:intracellular membrane-bounded organelle
PM01G02920	0	0	0	0	0	0.09	0	0.01	GO:0008150:biological_process|GO:0005737:cytoplasm|GO:0016021:integral component of membrane|GO:0005634:nucleus
PM01G02930	0.87	0.95	2	2.33	1.7	2.84	5.19	1.71	GO:0017112:Rab guanyl-nucleotide exchange factor activity|GO:0008150:biological_process|GO:0005262:calcium channel activity|GO:0070588:calcium ion transmembrane transport|GO:0032869:cellular response to insulin stimulus|GO:0005575:cellular_component|GO:0030659:cytoplasmic vesicle membrane|GO:0005829:cytosol|GO:0050982:detection of mechanical stimulus|GO:0032593:insulin-responsive compartment|GO:0…
PM01G02940	0.32	0.22	0.08	0.24	0.48	0.24	0.4	0.38	GO:0005524:ATP binding|GO:0030126:COPI vesicle coat|GO:0003677:DNA binding|GO:0006888:ER to Golgi vesicle-mediated transport|GO:1990452:Parkin-FBXW7-Cul1 ubiquitin ligase complex|GO:0034388:Pwp2p-containing subcomplex of 90S preribosome|GO:0019005:SCF ubiquitin ligase complex|GO:0031146:SCF-dependent proteasomal ubiquitin-dependent protein catabolic process|GO:0005826:actomyosin contractile ring|…
PM01G02950	0.46	0.23	0.23	0.18	0.4	0.31	0.13	0.38	GO:0080008:Cul4-RING E3 ubiquitin ligase complex|GO:0003677:DNA binding|GO:0006281:DNA repair|GO:0034388:Pwp2p-containing subcomplex of 90S preribosome|GO:0003723:RNA binding|GO:0008380:RNA splicing|GO:0000347:THO complex|GO:0009738:abscisic acid-activated signaling pathway|GO:0008150:biological_process|GO:0005575:cellular_component|GO:0005737:cytoplasm|GO:0031047:gene silencing by RNA|GO:0016874…
PM01G02960	5.03	6.55	10.87	12.84	11.01	8.83	13.44	10.92	GO:0051117:ATPase binding|GO:0070531:BRCA1-A complex|GO:0031436:BRCA1-BARD1 complex|GO:0000729:DNA double-strand break processing|GO:0006260:DNA replication|GO:0000731:DNA synthesis involved in DNA repair|GO:0006888:ER to Golgi vesicle-mediated transport|GO:0031430:M band|GO:0003950:NAD+ ADP-ribosyltransferase activity|GO:0003723:RNA binding|GO:0030018:Z disc|GO:0030506:ankyrin binding|GO:0030673…
PM01G02970	5.03	3.45	11.23	6.15	4.63	3.42	2.48	1.91	GO:0003677:DNA binding|GO:0003723:RNA binding|GO:0004190:aspartic-type endopeptidase activity|GO:0008150:biological_process|GO:0005575:cellular_component|GO:0005737:cytoplasm|GO:0005829:cytosol|GO:0005576:extracellular region|GO:0005815:microtubule organizing center|GO:0003676:nucleic acid binding|GO:0005654:nucleoplasm|GO:0005634:nucleus|GO:0009505:plant-type cell wall|GO:0009506:plasmodesma|GO:…
PM01G02980	5.75	3.45	6.78	8.26	8.68	6.41	10.27	5.37	GO:0008150:biological_process|GO:0016021:integral component of membrane|GO:0005739:mitochondrion|GO:0003674:molecular_function|GO:0009506:plasmodesma
PM01G02990	1.11	0.69	1.15	1.04	1.36	1.52	1.85	0.14
PM01G03000	2.29	0.87	0.13	2.49	0.98	5.23	5.5	8.61	GO:0008766:UDP-N-acetylmuramoylalanyl-D-glutamyl-2,6-diaminopimelate-D-alanyl-D-alanine ligase activity|GO:0008150:biological_process|GO:0005575:cellular_component|GO:0043773:coenzyme F420-0 gamma-glutamyl ligase activity|GO:0043774:coenzyme F420-2 alpha-glutamyl ligase activity|GO:0005737:cytoplasm|GO:0006952:defense response|GO:0070987:error-free translesion synthesis|GO:0016874:ligase activity…
PM01G03010	11.66	7.74	7.72	5.22	5.26	7.64	2.79	24.83	GO:0005525:GTP binding|GO:0030742:GTP-dependent protein binding|GO:0003924:GTPase activity|GO:0005794:Golgi apparatus|GO:0007420:brain development|GO:0043009:chordate embryonic development|GO:0001654:eye development|GO:0005622:intracellular|GO:0006886:intracellular protein transport|GO:0034389:lipid particle organization|GO:0007275:multicellular organism development|GO:0080115:myosin XI tail bind…
PM01G03020	311.42	65.86	6.91	7.12	158.24	135.94	159.37	621.99	GO:0009992:cellular water homeostasis|GO:0042807:central vacuole|GO:0009941:chloroplast envelope|GO:0005737:cytoplasm|GO:0009740:gibberellic acid mediated signaling pathway|GO:0015254:glycerol channel activity|GO:0080170:hydrogen peroxide transmembrane transport|GO:0005887:integral component of plasma membrane|GO:0034220:ion transmembrane transport|GO:0016020:membrane|GO:0009705:plant-type vacuol…
PM01G03030	23.76	6.75	19.13	15.13	20.56	30.26	27.61	13.82	GO:0042023:DNA endoreduplication|GO:0008150:biological_process|GO:0007049:cell cycle|GO:0051301:cell division|GO:0008283:cell proliferation|GO:0005575:cellular_component|GO:0003682:chromatin binding|GO:0004693:cyclin-dependent protein serine/threonine kinase activity|GO:0016538:cyclin-dependent protein serine/threonine kinase regulator activity|GO:0005737:cytoplasm|GO:0009790:embryo development|G…
PM01G03040	13.88	21.74	111.01	23.07	4.75	13.03	3.1	3.76	GO:0051537:2 iron, 2 sulfur cluster binding|GO:0009822:alkaloid catabolic process|GO:0008219:cell death|GO:0006725:cellular aromatic compound metabolic process|GO:0015995:chlorophyll biosynthetic process|GO:0015996:chlorophyll catabolic process|GO:0009507:chloroplast|GO:0009941:chloroplast envelope|GO:0009706:chloroplast inner membrane|GO:0009534:chloroplast thylakoid|GO:0009535:chloroplast thyla…
PM01G03050	17.37	17.51	31.81	7.86	3.18	6.06	3.67	1.35	GO:0003677:DNA binding|GO:0008150:biological_process|GO:0009507:chloroplast|GO:0003674:molecular_function|GO:0000788:nuclear nucleosome|GO:0006334:nucleosome assembly|GO:0005634:nucleus
PM01G03060	2.03	5.05	8.82	9.84	8.51	6.23	8.29	16.28	GO:0005794:Golgi apparatus|GO:0009660:amyloplast organization|GO:0008150:biological_process|GO:0005575:cellular_component|GO:0009630:gravitropism|GO:0005770:late endosome|GO:0044351:macropinocytosis|GO:0003674:molecular_function|GO:0009959:negative gravitropism|GO:0005730:nucleolus|GO:0005634:nucleus|GO:0009705:plant-type vacuole membrane|GO:0009958:positive gravitropism|GO:0000003:reproduction
PM01G03070	25.19	80.22	96.73	118.57	104.09	104.35	61.85	4.76	GO:0098656:anion transmembrane transport|GO:0016021:integral component of membrane|GO:0005215:transporter activity
PM01G03080	4.25	3.06	18.63	17.9	13.11	11.82	2.89	1.54	GO:0005737:cytoplasm|GO:0006749:glutathione metabolic process|GO:0004364:glutathione transferase activity
PM01G03090	3.63	6.48	9.59	10.31	11.3	11.2	7.28	19.99	GO:0036396:MIS complex|GO:0003723:RNA binding|GO:0001510:RNA methylation|GO:0008757:S-adenosylmethionine-dependent methyltransferase activity|GO:0005737:cytoplasm|GO:0005829:cytosol|GO:0009793:embryo development ending in seed dormancy|GO:0016422:mRNA (2'-O-methyladenosine-N6-)-methyltransferase activity|GO:0061157:mRNA destabilization|GO:0080009:mRNA methylation|GO:0000398:mRNA splicing, via spl…
PM01G03100	0.45	0.15	0.03	0.36	0.08	0.13	0.17	0.47	GO:0008150:biological_process|GO:0009507:chloroplast|GO:0004197:cysteine-type endopeptidase activity|GO:0005615:extracellular space|GO:0016021:integral component of membrane|GO:0005764:lysosome|GO:0005739:mitochondrion|GO:0003674:molecular_function|GO:0005634:nucleus|GO:0005886:plasma membrane|GO:0051603:proteolysis involved in cellular protein catabolic process
PM01G03110	0.77	0.01	0	0.11	0.42	1.64	1	0.54	GO:0008150:biological_process|GO:0003674:molecular_function
PM01G03120	46.77	31.49	36.46	37.05	29.74	40.02	21.13	21.76	GO:0005737:cytoplasm|GO:0061630:ubiquitin protein ligase activity|GO:0031625:ubiquitin protein ligase binding|GO:0006511:ubiquitin-dependent protein catabolic process
PM01G03130	1.38	1.19	2.3	2.38	2.25	1.48	1.87	4.74
PM01G03140	13.4	39.34	71.6	63.18	8.25	10.33	23.85	2.07	GO:0005524:ATP binding|GO:0005516:calmodulin binding|GO:0004683:calmodulin-dependent protein kinase activity|GO:0007166:cell surface receptor signaling pathway|GO:0005737:cytoplasm|GO:0016021:integral component of membrane|GO:0016301:kinase activity|GO:0005634:nucleus|GO:0016310:phosphorylation|GO:0005886:plasma membrane|GO:0009555:pollen development|GO:0006468:protein phosphorylation|GO:0004674:…
PM01G03150	6.52	7.16	7.86	6.38	7.2	6.66	3.85	8.41	GO:0003677:DNA binding|GO:0000978:RNA polymerase II core promoter proximal region sequence-specific DNA binding|GO:0000979:RNA polymerase II core promoter sequence-specific DNA binding|GO:0008150:biological_process|GO:0051213:dioxygenase activity|GO:0033169:histone H3-K9 demethylation|GO:0035035:histone acetyltransferase binding|GO:0032452:histone demethylase activity|GO:0071558:histone demethyla…
PM01G03160	1.32	0.53	1.76	3.65	3.54	2.74	1.19	1.44	GO:0030686:90S preribosome|GO:0003723:RNA binding|GO:0005829:cytosol|GO:0022625:cytosolic large ribosomal subunit|GO:0000470:maturation of LSU-rRNA|GO:0016020:membrane|GO:0005730:nucleolus|GO:0005634:nucleus|GO:0005840:ribosome|GO:0006412:translation
PM01G03170	1.66	0.98	1.44	2.6	2	1.81	2.2	3.42	GO:0000175:3'-5'-exoribonuclease activity|GO:0003723:RNA binding|GO:0006396:RNA processing|GO:0034475:U4 snRNA 3'-end processing|GO:0005737:cytoplasm|GO:0000177:cytoplasmic exosome (RNase complex)|GO:0005829:cytosol|GO:0000176:nuclear exosome (RNase complex)|GO:0071028:nuclear mRNA surveillance|GO:0034427:nuclear-transcribed mRNA catabolic process, exonucleolytic, 3'-5'|GO:0005730:nucleolus|GO:00…
PM01G03180	0.64	0.15	0.01	0.04	0.32	0.74	1.84	0.21	GO:0008150:biological_process|GO:0009867:jasmonic acid mediated signaling pathway|GO:0010311:lateral root formation|GO:0005634:nucleus|GO:0010199:organ boundary specification between lateral organs and the meristem|GO:1900150:regulation of defense response to fungus|GO:0009753:response to jasmonic acid|GO:0010089:xylem development
PM01G03190	0.53	0.3	0	0.16	0.38	0.04	0.68	0.03
PM01G03200	76.4	12.28	9.15	16.38	60.24	23.9	61.8	3.57	GO:0005794:Golgi apparatus|GO:0008150:biological_process|GO:0009507:chloroplast|GO:0006952:defense response|GO:0005783:endoplasmic reticulum|GO:0016021:integral component of membrane|GO:0016020:membrane|GO:0005739:mitochondrion|GO:0003674:molecular_function
PM01G03210	40.84	10.41	35.7	93.38	126.63	20.35	35.93	0.73	GO:0005886:plasma membrane|GO:0022857:transmembrane transporter activity|GO:0006810:transport
PM01G03220	0.98	1.02	2.42	4.55	6.23	3.03	4.85	2.71	GO:0008150:biological_process|GO:0007049:cell cycle|GO:0051301:cell division|GO:0005575:cellular_component|GO:0005813:centrosome|GO:0009507:chloroplast|GO:0005737:cytoplasm|GO:0005856:cytoskeleton|GO:0030496:midbody|GO:0007067:mitotic nuclear division|GO:0072686:mitotic spindle|GO:1990023:mitotic spindle midzone|GO:0097431:mitotic spindle pole|GO:0003674:molecular_function|GO:0005634:nucleus|GO:0…
PM01G03230	1.07	0.67	0.01	0.07	1.41	0.61	0.19	0	GO:0016021:integral component of membrane|GO:0005634:nucleus|GO:0043161:proteasome-mediated ubiquitin-dependent protein catabolic process|GO:0016567:protein ubiquitination|GO:0061630:ubiquitin protein ligase activity|GO:0008270:zinc ion binding
PM01G03240	1.7	1.52	0.07	0.3	0.89	0.33	5.11	0.02	GO:0016021:integral component of membrane|GO:0005634:nucleus|GO:0043161:proteasome-mediated ubiquitin-dependent protein catabolic process|GO:0016567:protein ubiquitination|GO:0061630:ubiquitin protein ligase activity|GO:0008270:zinc ion binding
PM01G03250	1.37	0.83	1.29	1.56	0.71	2.06	7.04	0	GO:0005887:integral component of plasma membrane|GO:0022891:substrate-specific transmembrane transporter activity
PM01G03260	0.13	0.02	0.02	0.05	0.04	0.07	88.96	0.06	GO:0005887:integral component of plasma membrane|GO:0022891:substrate-specific transmembrane transporter activity
PM01G03270	7.85	8.36	8.92	14.9	14.96	13.01	14.47	5.16	GO:0008150:biological_process|GO:0005575:cellular_component|GO:0005765:lysosomal membrane|GO:0003674:molecular_function|GO:0005634:nucleus|GO:0005515:protein binding|GO:0032526:response to retinoic acid
PM01G03280	3.68	6.35	8.49	6.82	7.33	9.86	6.8	9.61	GO:0003677:DNA binding|GO:0051213:dioxygenase activity|GO:0009793:embryo development ending in seed dormancy|GO:0008198:ferrous iron binding|GO:0048439:flower morphogenesis|GO:0000792:heterochromatin|GO:0034720:histone H3-K4 demethylation|GO:0033169:histone H3-K9 demethylation|GO:0032452:histone demethylase activity|GO:0071558:histone demethylase activity (H3-K27 specific)|GO:0032453:histone deme…
PM01G03290	0.99	2.87	7.34	4.32	4.17	5.16	4.01	1.9
PM01G03300	7.02	4.43	2.95	3.7	6.14	4.39	11.79	4.7	GO:0008080:N-acetyltransferase activity|GO:0008150:biological_process|GO:0005575:cellular_component|GO:0009507:chloroplast|GO:0005737:cytoplasm|GO:0005829:cytosol|GO:0006952:defense response|GO:0004145:diamine N-acetyltransferase activity|GO:0008152:metabolic process|GO:0005634:nucleus|GO:0006591:ornithine metabolic process|GO:0009753:response to jasmonic acid
PM01G03310	2.22	2.27	4.89	9	8.11	6.5	6.1	29.16	GO:0034388:Pwp2p-containing subcomplex of 90S preribosome|GO:0005834:heterotrimeric G-protein complex|GO:0000462:maturation of SSU-rRNA from tricistronic rRNA transcript (SSU-rRNA, 5.8S rRNA, LSU-rRNA)|GO:0005730:nucleolus|GO:0000166:nucleotide binding|GO:0005634:nucleus|GO:0032040:small-subunit processome|GO:0030515:snoRNA binding
PM01G03320	7.07	8.34	56.77	80.06	65.98	61.12	38.4	51.97	GO:0043531:ADP binding|GO:0005524:ATP binding|GO:0046034:ATP metabolic process|GO:0016887:ATPase activity|GO:1904288:BAT3 complex binding|GO:0006281:DNA repair|GO:0036513:Derlin-1 retrotranslocation complex|GO:0006888:ER to Golgi vesicle-mediated transport|GO:0071712:ER-associated misfolded protein catabolic process|GO:0030433:ER-associated ubiquitin-dependent protein catabolic process|GO:0036503…
PM01G03330	13.68	9.01	12.05	11.33	10.25	13.91	12.42	6.89	GO:0005525:GTP binding|GO:0003924:GTPase activity|GO:0005794:Golgi apparatus|GO:0001525:angiogenesis|GO:0009507:chloroplast|GO:0010009:cytoplasmic side of endosome membrane|GO:0005769:early endosome|GO:0031901:early endosome membrane|GO:0045022:early endosome to late endosome transport|GO:0030139:endocytic vesicle|GO:0006897:endocytosis|GO:0005783:endoplasmic reticulum|GO:0005768:endosome|GO:0001…
PM01G03340	34.31	27.08	3.39	5.55	7.26	4.28	12.58	1.31	GO:0046916:cellular transition metal ion homeostasis|GO:0005507:copper ion binding|GO:0005737:cytoplasm|GO:0046872:metal ion binding|GO:0030001:metal ion transport|GO:0005886:plasma membrane|GO:0046914:transition metal ion binding
PM01G03350	5.04	3.68	4.74	3.58	3.65	3.33	3.52	8.59	GO:0000981:RNA polymerase II transcription factor activity, sequence-specific DNA binding|GO:0005634:nucleus|GO:0006357:regulation of transcription from RNA polymerase II promoter
PM01G03360	0	0	1.06	0.42	0.05	113.17	0.02	0.14	GO:0005576:extracellular region|GO:0020037:heme binding|GO:0042744:hydrogen peroxide catabolic process|GO:0046872:metal ion binding|GO:0055114:oxidation-reduction process|GO:0004601:peroxidase activity|GO:0009505:plant-type cell wall|GO:0009664:plant-type cell wall organization|GO:0006979:response to oxidative stress
PM01G03370	10.19	13.43	11.84	3.8	1.4	11.44	31.12	26.03	GO:0016207:4-coumarate-CoA ligase activity|GO:0005524:ATP binding|GO:0016405:CoA-ligase activity|GO:0009851:auxin biosynthetic process|GO:0009850:auxin metabolic process|GO:0005575:cellular_component|GO:0009507:chloroplast|GO:0005737:cytoplasm|GO:0050832:defense response to fungus|GO:0004321:fatty-acyl-CoA synthase activity|GO:0016021:integral component of membrane|GO:0009695:jasmonic acid biosyn…
PM01G03380	0.42	0.3	0	0.04	0.03	6.21	0.46	0.06	GO:0016207:4-coumarate-CoA ligase activity|GO:0005524:ATP binding|GO:0016405:CoA-ligase activity|GO:0009851:auxin biosynthetic process|GO:0009850:auxin metabolic process|GO:0005575:cellular_component|GO:0009507:chloroplast|GO:0005737:cytoplasm|GO:0050832:defense response to fungus|GO:0004321:fatty-acyl-CoA synthase activity|GO:0016021:integral component of membrane|GO:0009695:jasmonic acid biosyn…
PM01G03390	7.47	3.12	4.48	4.15	3.24	3.45	3.77	2.88
PM01G03400	7.02	8.89	19.3	20.93	14.53	11.88	16.14	5.27	GO:0003723:RNA binding|GO:0009501:amyloplast|GO:0009507:chloroplast|GO:0005829:cytosol|GO:0000455:enzyme-directed rRNA pseudouridine synthesis|GO:0000488:maturation of LSU-rRNA from tetracistronic rRNA transcript (SSU-rRNA, LSU-rRNA, 4.5S-rRNA, 5S-rRNA)|GO:0000489:maturation of SSU-rRNA from tetracistronic rRNA transcript (SSU-rRNA, LSU-rRNA, 4.5S-rRNA, 5S-rRNA)|GO:0009536:plastid|GO:0032544:plas…
PM01G03410	0.81	0.99	0.78	1.16	1.42	4.65	1.06	0.78	GO:0008574:ATP-dependent microtubule motor activity, plus-end-directed|GO:0030705:cytoskeleton-dependent intracellular transport|GO:0005871:kinesin complex|GO:0007018:microtubule-based movement|GO:0008104:protein localization
PM01G03420	3.26	4.44	9.82	10.76	8.11	7.66	5.75	12.93	GO:0003723:RNA binding|GO:0006396:RNA processing|GO:0008380:RNA splicing|GO:0071013:catalytic step 2 spliceosome|GO:0003729:mRNA binding|GO:0006397:mRNA processing|GO:0000398:mRNA splicing, via spliceosome|GO:0015630:microtubule cytoskeleton|GO:0005815:microtubule organizing center|GO:0016607:nuclear speck|GO:0003676:nucleic acid binding|GO:0005654:nucleoplasm|GO:0000166:nucleotide binding|GO:000…
PM01G03430	0.54	0.1	0.18	0.86	0.59	0.65	0	0	GO:0004497:monooxygenase activity|GO:0044550:secondary metabolite biosynthetic process
PM01G03440	20.72	4.25	23.63	29.07	17.3	25.2	77.05	0.79	GO:0004497:monooxygenase activity|GO:0044550:secondary metabolite biosynthetic process
PM01G03450	10.12	8.83	0.62	9.96	5.41	5.13	49.04	2.32	GO:0004497:monooxygenase activity|GO:0044550:secondary metabolite biosynthetic process
PM01G03460	1.2	0.17	0	0	0.01	0.13	8.83	0	GO:0005618:cell wall|GO:0005829:cytosol|GO:0005576:extracellular region|GO:0016020:membrane|GO:0009505:plant-type cell wall|GO:0009828:plant-type cell wall loosening|GO:0009831:plant-type cell wall modification involved in multidimensional cell growth|GO:0009664:plant-type cell wall organization|GO:0009506:plasmodesma|GO:0010119:regulation of stomatal movement|GO:0009739:response to gibberellin|G…
PM01G03470	0	0	0	0	0	0.02	0	0	GO:0019005:SCF ubiquitin ligase complex|GO:0007568:aging|GO:0009926:auxin polar transport|GO:0009734:auxin-activated signaling pathway|GO:0042335:cuticle development|GO:0007275:multicellular organism development|GO:0010187:negative regulation of seed germination|GO:0005634:nucleus|GO:1902584:positive regulation of response to water deprivation|GO:0016567:protein ubiquitination|GO:0009934:regulati…
PM01G03480	0	0	0	0	0	0	0	0	GO:0007275:multicellular organism development
PM01G03490	0	0	0	0	0	0	0	0
PM01G03500	0	1.44	0	0	0	0	20.06	0
PM01G03510	0.63	0.12	0.06	0.11	0.62	0.39	0.71	0.06	GO:0005618:cell wall|GO:0005829:cytosol|GO:0005576:extracellular region|GO:0016020:membrane|GO:0009505:plant-type cell wall|GO:0009828:plant-type cell wall loosening|GO:0009831:plant-type cell wall modification involved in multidimensional cell growth|GO:0009664:plant-type cell wall organization|GO:0009506:plasmodesma|GO:0010119:regulation of stomatal movement|GO:0009739:response to gibberellin|G…
PM01G03520	0.33	0	0	0	0	0.01	3.89	0	GO:0005618:cell wall|GO:0005829:cytosol|GO:0005576:extracellular region|GO:0016020:membrane|GO:0009505:plant-type cell wall|GO:0009828:plant-type cell wall loosening|GO:0009831:plant-type cell wall modification involved in multidimensional cell growth|GO:0009664:plant-type cell wall organization|GO:0009506:plasmodesma|GO:0010119:regulation of stomatal movement|GO:0009739:response to gibberellin|G…
PM01G03530	3.29	1.72	1.06	2.18	3.37	4.11	1.15	3.82	GO:0045454:cell redox homeostasis|GO:0034599:cellular response to oxidative stress|GO:0009507:chloroplast|GO:0031969:chloroplast membrane|GO:0009570:chloroplast stroma|GO:0006662:glycerol ether metabolic process|GO:0055114:oxidation-reduction process|GO:0016671:oxidoreductase activity, acting on a sulfur group of donors, disulfide as acceptor|GO:0015035:protein disulfide oxidoreductase activity|G…
PM01G03540	0.1	0.08	0	0.03	0.05	0.3	0.13	0.17	GO:0005618:cell wall|GO:0009507:chloroplast|GO:0005576:extracellular region|GO:0016020:membrane|GO:0009505:plant-type cell wall|GO:0009828:plant-type cell wall loosening|GO:0009831:plant-type cell wall modification involved in multidimensional cell growth|GO:0009664:plant-type cell wall organization|GO:0080022:primary root development|GO:0010119:regulation of stomatal movement|GO:0009739:response…
PM01G03550	6.83	11.06	8.36	10.79	10.84	15.33	10.37	26.14	GO:0003723:RNA binding|GO:0009738:abscisic acid-activated signaling pathway|GO:0008150:biological_process|GO:0005575:cellular_component|GO:0009507:chloroplast|GO:0005737:cytoplasm|GO:0010150:leaf senescence|GO:0098779:mitophagy in response to mitochondrial depolarization|GO:0003674:molecular_function|GO:0005634:nucleus|GO:0044822:poly(A) RNA binding|GO:0009737:response to abscisic acid|GO:0009753…
PM01G03560	1.71	0.19	0.01	0.07	0.19	0.26	0	0.13	GO:0046916:cellular transition metal ion homeostasis|GO:0005737:cytoplasm|GO:0046872:metal ion binding|GO:0030001:metal ion transport|GO:0005886:plasma membrane|GO:0046914:transition metal ion binding
PM01G03570	17.34	24.83	12.26	15.14	12.34	14.86	20.15	13.51	GO:0016021:integral component of membrane|GO:0015099:nickel cation transmembrane transporter activity|GO:0015675:nickel cation transport|GO:0005886:plasma membrane
PM01G03580	16.17	24.25	24.03	6.46	4.87	5.02	0.37	2.03	GO:0005524:ATP binding|GO:0042626:ATPase activity, coupled to transmembrane movement of substances|GO:0016021:integral component of membrane|GO:0005739:mitochondrion|GO:0005886:plasma membrane|GO:0009414:response to water deprivation|GO:0010148:transpiration
PM01G03590	8.18	4.77	9.36	12.22	11.29	8.98	13.32	5.42	GO:0005576:extracellular region|GO:0005622:intracellular|GO:0035556:intracellular signal transduction|GO:0016020:membrane|GO:0005634:nucleus|GO:0006813:potassium ion transport|GO:0005515:protein binding|GO:0051260:protein homooligomerization|GO:0016567:protein ubiquitination|GO:0019953:sexual reproduction|GO:0005249:voltage-gated potassium channel activity|GO:0008076:voltage-gated potassium chann…
PM01G03600	6.71	2.62	0.41	0.08	8.15	1.7	1.17	0.23	GO:0009507:chloroplast|GO:0005737:cytoplasm|GO:0006952:defense response|GO:0005783:endoplasmic reticulum|GO:0010286:heat acclimation|GO:0016021:integral component of membrane|GO:0016020:membrane|GO:0003674:molecular_function|GO:0005634:nucleus|GO:0005886:plasma membrane|GO:0009408:response to heat|GO:0009615:response to virus|GO:0046741:transport of virus in host, tissue to tissue
PM01G03610	0.03	0.01	0	0	0	0.01	0	303.25	GO:0008150:biological_process|GO:0016021:integral component of membrane|GO:0005739:mitochondrion|GO:0003674:molecular_function|GO:0005634:nucleus
PM01G03620	7.53	10.51	27.49	23.37	18.13	19.51	15.06	16.15	GO:0008408:3'-5' exonuclease activity|GO:0000175:3'-5'-exoribonuclease activity|GO:0004534:5'-3' exoribonuclease activity|GO:0071034:CUT catabolic process|GO:0003723:RNA binding|GO:0090503:RNA phosphodiester bond hydrolysis, exonucleolytic|GO:0006396:RNA processing|GO:0003824:catalytic activity|GO:0044237:cellular metabolic process|GO:0005737:cytoplasm|GO:0009048:dosage compensation by inactivati…
PM01G03630	16.51	15.04	11.44	27.46	43.56	29.07	55.52	37.29	GO:0006564:L-serine biosynthetic process|GO:0004648:O-phospho-L-serine:2-oxoglutarate aminotransferase activity|GO:0009507:chloroplast|GO:0009570:chloroplast stroma|GO:0009534:chloroplast thylakoid|GO:0005829:cytosol|GO:0009536:plastid|GO:0046686:response to cadmium ion|GO:0009735:response to cytokinin|GO:0008483:transaminase activity
PM01G03640	22.19	15.49	28.82	34.05	33.57	31.44	27.34	43	GO:0005524:ATP binding|GO:0004004:ATP-dependent RNA helicase activity|GO:0008026:ATP-dependent helicase activity|GO:0003723:RNA binding|GO:0003724:RNA helicase activity|GO:0010501:RNA secondary structure unwinding|GO:0008186:RNA-dependent ATPase activity|GO:0005737:cytoplasm|GO:0005829:cytosol|GO:0005635:nuclear envelope|GO:0005634:nucleus|GO:0005886:plasma membrane|GO:0016973:poly(A)+ mRNA expor…
PM01G03650	200.95	119.15	20.13	33.17	7.23	17.57	1.39	0.93	GO:0030246:carbohydrate binding|GO:0005975:carbohydrate metabolic process|GO:0003824:catalytic activity|GO:0009507:chloroplast|GO:0009535:chloroplast thylakoid membrane|GO:0016020:membrane|GO:0009773:photosynthetic electron transport in photosystem I|GO:0010628:positive regulation of gene expression
PM01G03660	124.24	154.55	11.13	25.02	4.53	9.53	1.36	0.24	GO:0030246:carbohydrate binding|GO:0005975:carbohydrate metabolic process|GO:0003824:catalytic activity|GO:0009507:chloroplast|GO:0009535:chloroplast thylakoid membrane|GO:0016020:membrane|GO:0009773:photosynthetic electron transport in photosystem I|GO:0010628:positive regulation of gene expression
PM01G03670	1.63	1.8	2.57	3.7	2.84	2.21	5.32	2.86	GO:0005575:cellular_component|GO:0016788:hydrolase activity, acting on ester bonds|GO:0005634:nucleus
PM01G03680	139.33	185.06	827.71	990.54	428.36	264.2	341.34	2223.45	GO:0003723:RNA binding|GO:0008150:biological_process|GO:0019722:calcium-mediated signaling|GO:0005737:cytoplasm|GO:0005829:cytosol|GO:0005622:intracellular|GO:0003674:molecular_function|GO:0005634:nucleus|GO:0005515:protein binding
PM01G03690	0.51	0.43	0.3	0.35	0.33	1.08	0.73	0.3	GO:0005618:cell wall|GO:0005737:cytoplasm|GO:0009567:double fertilization forming a zygote and endosperm|GO:0005576:extracellular region|GO:0008152:metabolic process|GO:0005777:peroxisome|GO:0006508:proteolysis|GO:0004252:serine-type endopeptidase activity
PM01G03700	13.87	13.28	16.22	45.13	41.55	13.36	23.05	1.41	GO:0005524:ATP binding|GO:0009507:chloroplast|GO:0042742:defense response to bacterium|GO:0016021:integral component of membrane|GO:0016301:kinase activity|GO:0016310:phosphorylation|GO:0005886:plasma membrane|GO:0009506:plasmodesma|GO:0005515:protein binding|GO:0004672:protein kinase activity|GO:0006468:protein phosphorylation|GO:0004674:protein serine/threonine kinase activity|GO:0004713:protei…
PM01G03710	2.28	3.2	3.87	4.6	4.69	3.5	9.51	2.92	GO:0090502:RNA phosphodiester bond hydrolysis, endonucleolytic|GO:0005655:nucleolar ribonuclease P complex|GO:0004526:ribonuclease P activity
PM01G03720	6.45	8.02	16.29	13.33	15.39	11.2	12.32	11.3	GO:0090502:RNA phosphodiester bond hydrolysis, endonucleolytic|GO:0005655:nucleolar ribonuclease P complex|GO:0004526:ribonuclease P activity
PM01G03730	12.73	12.98	21.23	0.24	0.54	3.91	0	0.41
PM01G03740	3.82	2.96	6.85	5.43	5.01	5.71	1.94	53.48	GO:0005524:ATP binding|GO:0006281:DNA repair|GO:0003723:RNA binding|GO:0008150:biological_process|GO:0005575:cellular_component|GO:0009507:chloroplast|GO:0005675:holo TFIIH complex|GO:0005739:mitochondrion|GO:0003674:molecular_function|GO:0000166:nucleotide binding|GO:0004672:protein kinase activity|GO:0006468:protein phosphorylation|GO:0000079:regulation of cyclin-dependent protein serine/threon…
PM01G03750	6.56	18.51	33.74	27.33	19.97	16.52	15.96	13.14	GO:0005524:ATP binding|GO:0004709:MAP kinase kinase kinase activity|GO:0000165:MAPK cascade|GO:0009738:abscisic acid-activated signaling pathway|GO:0008219:cell death|GO:0071281:cellular response to iron ion|GO:0005737:cytoplasm|GO:0005829:cytosol|GO:0002229:defense response to oomycetes|GO:0005769:early endosome|GO:0005783:endoplasmic reticulum|GO:0005789:endoplasmic reticulum membrane|GO:000987…
PM01G03760	37	29.95	90.85	96.02	93.22	60.45	35.88	124.63	GO:0008150:biological_process|GO:0003674:molecular_function|GO:0005634:nucleus
PM01G03770	0.4	0.25	0.17	0.08	0.83	0.1	0	0.12	GO:0008150:biological_process|GO:0005575:cellular_component|GO:0005737:cytoplasm|GO:0003674:molecular_function|GO:0005634:nucleus
PM01G03780	0.02	0.06	0.06	0.13	0.29	0.38	0.08	0.18	GO:0005524:ATP binding|GO:0003723:RNA binding|GO:0003724:RNA helicase activity|GO:0005737:cytoplasm|GO:0000932:cytoplasmic mRNA processing body|GO:0005615:extracellular space|GO:0031047:gene silencing by RNA|GO:0035195:gene silencing by miRNA|GO:0004386:helicase activity|GO:0016787:hydrolase activity|GO:0035279:mRNA cleavage involved in gene silencing by miRNA|GO:0000166:nucleotide binding|GO:004…
PM01G03790	0.29	0.09	0	0.06	0.36	0.33	0.03	0.08	GO:0009738:abscisic acid-activated signaling pathway|GO:0009850:auxin metabolic process|GO:0030154:cell differentiation|GO:0009932:cell tip growth|GO:0071472:cellular response to salt stress|GO:0009507:chloroplast|GO:0010588:cotyledon vascular tissue pattern formation|GO:0005737:cytoplasm|GO:0016787:hydrolase activity|GO:0046855:inositol phosphate dephosphorylation|GO:0048016:inositol phosphate-m…
PM01G03800	39.46	37.97	7.28	20.42	29.97	27.3	8.35	0.24	GO:0005887:integral component of plasma membrane|GO:0015116:sulfate transmembrane transporter activity
PM01G03810	11.03	10.22	0.06	0.82	5.16	1.53	0.41	2.38	GO:0005794:Golgi apparatus|GO:0008150:biological_process|GO:0005516:calmodulin binding|GO:0005737:cytoplasm|GO:0003674:molecular_function|GO:0005634:nucleus|GO:0009739:response to gibberellin
PM01G03820	0.02	0.02	0	0.02	0	0	0	0	GO:0006952:defense response|GO:0005886:plasma membrane|GO:0009506:plasmodesma|GO:0006468:protein phosphorylation|GO:0004674:protein serine/threonine kinase activity
PM01G03830	0.14	0.12	0	0.09	0.33	0.05	0	0.02
PM01G03840	18.57	18.49	14.44	16.62	6.67	12.68	17.99	10.91	GO:0031225:anchored component of membrane|GO:0008150:biological_process
PM01G03850	1.1	0.74	0.39	0.8	1.47	0.65	0.06	0.03	GO:0008150:biological_process|GO:0005576:extracellular region|GO:0010052:guard cell differentiation|GO:0003674:molecular_function|GO:0010374:stomatal complex development
PM01G03860	30.68	9.87	22.91	12.41	8.46	10.01	7.28	29.29	GO:0019509:L-methionine biosynthetic process from methylthioadenosine|GO:0005829:cytosol|GO:0005506:iron ion binding|GO:0046872:metal ion binding|GO:0006555:methionine metabolic process|GO:0005634:nucleus|GO:0055114:oxidation-reduction process|GO:0005886:plasma membrane|GO:0051302:regulation of cell division
PM01G03870	0.2	0.04	0.05	0.01	0.05	0.02	0.02	0.02	GO:0004497:monooxygenase activity|GO:0055114:oxidation-reduction process
PM01G03880	39.42	1.75	0.05	3.87	20.87	11.32	23.99	4.14	GO:0003677:DNA binding|GO:0006342:chromatin silencing|GO:0042742:defense response to bacterium|GO:0016048:detection of temperature stimulus|GO:0009908:flower development|GO:0000790:nuclear chromatin|GO:0000786:nucleosome|GO:0005634:nucleus|GO:0005515:protein binding|GO:0046982:protein heterodimerization activity|GO:0044030:regulation of DNA methylation|GO:0010468:regulation of gene expression
PM01G03890	2.4	1.89	0.46	0.6	0.77	2.6	3.52	0.08	GO:0008150:biological_process|GO:0005575:cellular_component|GO:0009507:chloroplast|GO:0005739:mitochondrion|GO:0003674:molecular_function|GO:0005634:nucleus
PM01G03900	0.89	1.2	0.52	0.53	0.22	0.32	0.06	0	GO:0042335:cuticle development|GO:0022626:cytosolic ribosome|GO:0005783:endoplasmic reticulum|GO:0005789:endoplasmic reticulum membrane|GO:0005576:extracellular region|GO:0006633:fatty acid biosynthetic process|GO:0009922:fatty acid elongase activity|GO:0030497:fatty acid elongation|GO:0016021:integral component of membrane|GO:0016020:membrane|GO:0005634:nucleus|GO:0048868:pollen tube development…
PM01G03910	0.86	3.75	2.44	5.57	2.99	2.64	6.36	3.66	GO:0008324:cation transmembrane transporter activity|GO:0009507:chloroplast|GO:0009941:chloroplast envelope|GO:0042802:identical protein binding|GO:0016021:integral component of membrane|GO:0034220:ion transmembrane transport|GO:0031965:nuclear membrane|GO:0005634:nucleus|GO:0006813:potassium ion transport
PM01G03920	0.28	2.81	0.94	1.57	0.91	0.98	2.69	3.42
PM01G03930	17.38	28.02	20.14	18.78	19.9	19.43	13.2	16.81	GO:0005524:ATP binding|GO:0071949:FAD binding|GO:0050661:NADP binding|GO:0045454:cell redox homeostasis|GO:0009507:chloroplast|GO:0009570:chloroplast stroma|GO:0005507:copper ion binding|GO:0005737:cytoplasm|GO:0005829:cytosol|GO:0050660:flavin adenine dinucleotide binding|GO:0006749:glutathione metabolic process|GO:0004362:glutathione-disulfide reductase activity|GO:0016020:membrane|GO:0005739:m…
PM01G03940	15.83	10	10.81	12.27	16.39	13.58	12.61	20.73	GO:0051086:chaperone mediated protein folding independent of cofactor|GO:0005737:cytoplasm|GO:0005829:cytosol|GO:0070062:extracellular exosome|GO:0005739:mitochondrion|GO:0005730:nucleolus|GO:0005654:nucleoplasm|GO:0005634:nucleus|GO:0051495:positive regulation of cytoskeleton organization|GO:0016272:prefoldin complex|GO:0005515:protein binding|GO:0044183:protein binding involved in protein foldi…
PM01G03950	5.41	4.54	6.21	8.94	9.45	6.92	9.98	8.21	GO:0008673:2-dehydro-3-deoxygluconokinase activity|GO:0005524:ATP binding|GO:0006014:D-ribose metabolic process|GO:0005975:carbohydrate metabolic process|GO:0046835:carbohydrate phosphorylation|GO:0005737:cytoplasm|GO:0008865:fructokinase activity|GO:0019310:inositol catabolic process|GO:0019522:ketogluconate metabolic process|GO:0016301:kinase activity|GO:0003674:molecular_function|GO:0000166:nu…
PM01G03960	0.59	0.14	0	0.13	2.01	10.4	0.18	0.07	GO:0005794:Golgi apparatus|GO:0008150:biological_process|GO:0005737:cytoplasm|GO:0012505:endomembrane system|GO:0016021:integral component of membrane|GO:0003674:molecular_function|GO:0017022:myosin binding|GO:0005634:nucleus|GO:0030133:transport vesicle
PM01G03970	5.62	0.88	0.14	0.03	2.44	1.81	0.67	1
PM01G03980	0.42	0.12	0.02	0.16	0.7	0.37	0.38	0.25	GO:0003677:DNA binding|GO:0006281:DNA repair|GO:0006260:DNA replication|GO:0000731:DNA synthesis involved in DNA repair|GO:0003916:DNA topoisomerase activity|GO:0003917:DNA topoisomerase type I activity|GO:0006265:DNA topological change|GO:0006268:DNA unwinding involved in DNA replication|GO:0016605:PML body|GO:0005694:chromosome|GO:0007059:chromosome segregation|GO:0016853:isomerase activity|GO:…
PM01G03990	0.65	1.01	1.95	1.29	1.75	1.82	1.25	0.36	GO:0000966:RNA 5'-end processing|GO:0003723:RNA binding|GO:0008150:biological_process|GO:0009507:chloroplast|GO:0009793:embryo development ending in seed dormancy|GO:0006397:mRNA processing|GO:0005739:mitochondrion|GO:0003674:molecular_function
PM01G04000	0.06	0	0	0	0.02	0.09	0.07	0.03
PM01G04010	0.77	0.94	2.63	3.67	2.8	3.38	2.15	3.06	GO:0005524:ATP binding|GO:0003677:DNA binding|GO:0006306:DNA methylation|GO:0032776:DNA methylation on cytosine|GO:0010424:DNA methylation on cytosine within a CG sequence|GO:0006281:DNA repair|GO:0000419:DNA-directed RNA polymerase V complex|GO:0090577:RNA polymerase IV transcription factor complex|GO:0080188:RNA-directed DNA methylation|GO:0030437:ascospore formation|GO:0008150:biological_proce…
PM01G04020	11.63	12.8	2.62	5.27	36.88	16.39	7.14	5.41	GO:0004565:beta-galactosidase activity|GO:0005618:cell wall|GO:0005773:vacuole
PM01G04030	0.93	0.21	2.62	0.7	0.26	0.04	0.22	0.04	GO:0005618:cell wall|GO:0004252:serine-type endopeptidase activity
PM01G04040	20.02	16.7	24.4	11.41	4.88	6.82	1.23	1.18	GO:0008150:biological_process|GO:0009507:chloroplast|GO:0009535:chloroplast thylakoid membrane|GO:0016021:integral component of membrane|GO:0016020:membrane|GO:0003674:molecular_function|GO:0005634:nucleus
PM01G04050	4.29	17.65	22.58	22.67	24.37	24.86	13.34	20.59	GO:0008150:biological_process|GO:0005575:cellular_component|GO:0046872:metal ion binding|GO:0003674:molecular_function|GO:0005634:nucleus|GO:0016579:protein deubiquitination|GO:0036459:thiol-dependent ubiquitinyl hydrolase activity
PM01G04060	0	0	0	0	0	33.43	0	0.02	GO:0005484:SNAP receptor activity|GO:0000149:SNARE binding|GO:0031201:SNARE complex|GO:0009507:chloroplast|GO:0031901:early endosome membrane|GO:0005768:endosome|GO:0006887:exocytosis|GO:0016021:integral component of membrane|GO:0016020:membrane|GO:0005886:plasma membrane|GO:0015031:protein transport|GO:0006906:vesicle fusion
PM01G04070	7.4	33.38	1.74	2.12	0.27	0.57	0.05	13.44	GO:0008150:biological_process|GO:0007049:cell cycle|GO:0051301:cell division|GO:0010438:cellular response to sulfur starvation|GO:0009658:chloroplast organization|GO:0007140:male meiosis|GO:0051321:meiotic cell cycle|GO:0009556:microsporogenesis|GO:0003674:molecular_function|GO:0005634:nucleus|GO:0006792:regulation of sulfur utilization
PM01G04080	0.15	0.02	0.03	0	0.01	0.05	0	0.03	GO:0005794:Golgi apparatus|GO:0000139:Golgi membrane|GO:0031418:L-ascorbic acid binding|GO:0005737:cytoplasm|GO:0005783:endoplasmic reticulum|GO:0005789:endoplasmic reticulum membrane|GO:0005768:endosome|GO:0005576:extracellular region|GO:0016021:integral component of membrane|GO:0005506:iron ion binding|GO:0005739:mitochondrion|GO:0005634:nucleus|GO:0055114:oxidation-reduction process|GO:0016705…
PM01G04090	10.77	4.1	0.01	0.28	0.06	0.17	0.09	0.02	GO:0010143:cutin biosynthetic process|GO:0016311:dephosphorylation|GO:0090447:glycerol-3-phosphate 2-O-acyltransferase activity|GO:0016020:membrane|GO:0016791:phosphatase activity
PM01G04100	3.68	4.95	8.81	10.86	9.56	9.72	9.45	10.96	GO:0000175:3'-5'-exoribonuclease activity|GO:0030014:CCR4-NOT complex|GO:0030015:CCR4-NOT core complex|GO:0016593:Cdc73/Paf1 complex|GO:0006260:DNA replication|GO:0000076:DNA replication checkpoint|GO:0003723:RNA binding|GO:0090503:RNA phosphodiester bond hydrolysis, exonucleolytic|GO:0008150:biological_process|GO:0071216:cellular response to biotic stimulus|GO:0009267:cellular response to starva…
PM01G04110	13.93	0.47	0	1.6	10.86	10.85	0.2	3.34	GO:0005794:Golgi apparatus|GO:0031225:anchored component of membrane|GO:0046658:anchored component of plasma membrane|GO:0042335:cuticle development|GO:0050832:defense response to fungus|GO:0005783:endoplasmic reticulum|GO:0005576:extracellular region|GO:0016021:integral component of membrane|GO:0008289:lipid binding|GO:0006869:lipid transport|GO:0016020:membrane|GO:0003674:molecular_function|GO:…
PM01G04120	216.78	27.08	76.63	90.1	132.48	79.45	127.61	236.09	GO:0022627:cytosolic small ribosomal subunit|GO:0006407:rRNA export from nucleus|GO:0003735:structural constituent of ribosome
PM01G04130	0.13	0.2	0.22	0.49	0.47	1.51	0.14	1.24	GO:0008150:biological_process|GO:0005516:calmodulin binding|GO:0005575:cellular_component|GO:0009507:chloroplast|GO:0005737:cytoplasm|GO:0003674:molecular_function|GO:0005634:nucleus|GO:0010197:polar nucleus fusion|GO:0010119:regulation of stomatal movement|GO:0010200:response to chitin
PM01G04140	3.75	2.15	0.14	0.91	2.57	0.82	8.7	0.01	GO:0008150:biological_process|GO:0005739:mitochondrion|GO:0003674:molecular_function|GO:0005634:nucleus|GO:0005886:plasma membrane|GO:0080167:response to karrikin
PM01G04150	6.55	2.83	8.74	8.39	6.21	3.53	10.27	8.65	GO:0042023:DNA endoreduplication|GO:0007050:cell cycle arrest|GO:0030332:cyclin binding|GO:0004861:cyclin-dependent protein serine/threonine kinase inhibitor activity|GO:0005737:cytoplasm|GO:0001673:male germ cell nucleus|GO:0045786:negative regulation of cell cycle|GO:0045736:negative regulation of cyclin-dependent protein serine/threonine kinase activity|GO:0005654:nucleoplasm|GO:0005634:nucleu…
PM01G04160	0.36	0.12	0	0.19	0.04	6.41	0	0.03	GO:0009507:chloroplast|GO:0080019:fatty-acyl-CoA reductase (alcohol-forming) activity|GO:0043231:intracellular membrane-bounded organelle|GO:0006629:lipid metabolic process|GO:0035336:long-chain fatty-acyl-CoA metabolic process|GO:0055114:oxidation-reduction process|GO:0016628:oxidoreductase activity, acting on the CH-CH group of donors, NAD or NADP as acceptor|GO:0010584:pollen exine formation|G…
PM01G04170	15.37	8.67	19.18	20.74	19.08	13.05	11.13	18.41	GO:0008637:apoptotic mitochondrial changes|GO:0005575:cellular_component|GO:0005694:chromosome|GO:0000775:chromosome, centromeric region|GO:0005737:cytoplasm|GO:0005856:cytoskeleton|GO:0005829:cytosol|GO:0070062:extracellular exosome|GO:0016787:hydrolase activity|GO:0046872:metal ion binding|GO:0046580:negative regulation of Ras protein signal transduction|GO:0005730:nucleolus|GO:0005634:nucleus|…
PM01G04180	0.68	0.47	0.8	1.62	1.51	1.81	3.55	3.27
PM01G04190	0.56	0.27	0.47	0.67	0.76	14.03	0.81	1.7	GO:0018685:alkane 1-monooxygenase activity|GO:0070330:aromatase activity|GO:0071555:cell wall organization|GO:0005575:cellular_component|GO:0009507:chloroplast|GO:0006952:defense response|GO:0005783:endoplasmic reticulum|GO:0005789:endoplasmic reticulum membrane|GO:0005576:extracellular region|GO:0006631:fatty acid metabolic process|GO:0020037:heme binding|GO:0016021:integral component of membran…
PM01G04200	0.5	0.74	2.75	4.27	2.03	2.07	6.25	3.27	GO:0045454:cell redox homeostasis|GO:0034599:cellular response to oxidative stress|GO:0009507:chloroplast|GO:0031969:chloroplast membrane|GO:0009570:chloroplast stroma|GO:0006662:glycerol ether metabolic process|GO:0005739:mitochondrion|GO:0055114:oxidation-reduction process|GO:0016671:oxidoreductase activity, acting on a sulfur group of donors, disulfide as acceptor|GO:0005515:protein binding|GO…
PM01G04210	0.39	0.49	1.17	1.47	0.87	0.72	1.22	1.16	GO:0008150:biological_process|GO:0009507:chloroplast|GO:1900865:chloroplast RNA modification|GO:0031425:chloroplast RNA processing|GO:0016554:cytidine to uridine editing|GO:0006397:mRNA processing|GO:0080156:mitochondrial mRNA modification|GO:0005739:mitochondrion|GO:0003674:molecular_function|GO:0008270:zinc ion binding
PM01G04220	0.93	1.98	3.76	4.43	3.27	3.68	3.31	6.52	GO:0008150:biological_process|GO:0005575:cellular_component|GO:0009507:chloroplast|GO:0009793:embryo development ending in seed dormancy|GO:0016020:membrane|GO:0005739:mitochondrion|GO:0003674:molecular_function
PM01G04230	6.16	2.68	25.47	14.41	4.2	5.39	5.59	20.62	GO:0008150:biological_process|GO:0009507:chloroplast|GO:0003674:molecular_function
PM01G04240	1.27	0.11	0	0.39	0.65	5.58	4.81	1.7	GO:0008150:biological_process|GO:0016021:integral component of membrane|GO:0005765:lysosomal membrane|GO:0016020:membrane|GO:0003674:molecular_function|GO:0006810:transport
PM01G04250	0.85	0.18	0	0.3	0.83	4.77	2.72	0.37	GO:0008150:biological_process|GO:0016021:integral component of membrane|GO:0005765:lysosomal membrane|GO:0016020:membrane|GO:0003674:molecular_function|GO:0006810:transport
PM01G04260	2.39	1.23	2.56	4.94	5.65	4.4	3.27	1.01	GO:0031463:Cul3-RING ubiquitin ligase complex|GO:0004842:ubiquitin-protein transferase activity
PM01G04270	1.31	0.2	0.67	0.75	0.93	0.87	0.85	4.96
PM01G04280	1.71	0.18	0	0.17	0.93	0.65	0.45	0	GO:0008150:biological_process|GO:0005575:cellular_component|GO:0003674:molecular_function
PM01G04290	25.92	10.98	19.66	19.64	20.64	10.37	43.56	17.25	GO:0005743:mitochondrial inner membrane|GO:0005762:mitochondrial large ribosomal subunit|GO:0005739:mitochondrion|GO:0003735:structural constituent of ribosome|GO:0006412:translation
PM01G04300	228.92	191.9	175.61	58.52	23.25	70.95	30.74	10.01	GO:0048046:apoplast|GO:0005975:carbohydrate metabolic process|GO:0044262:cellular carbohydrate metabolic process|GO:0009507:chloroplast|GO:0009941:chloroplast envelope|GO:0009570:chloroplast stroma|GO:0009535:chloroplast thylakoid membrane|GO:0005829:cytosol|GO:0009793:embryo development ending in seed dormancy|GO:0046872:metal ion binding|GO:0019323:pentose catabolic process|GO:0006098:pentose-p…
PM01G04310	10.85	3.93	5.99	5.78	8.63	6.6	7.37	7.8	GO:0005794:Golgi apparatus|GO:0008150:biological_process|GO:0005737:cytoplasm|GO:0016757:transferase activity, transferring glycosyl groups
PM01G04320	1.63	1.8	3.95	4.07	4.06	3.81	3.48	3.23	GO:0045330:aspartyl esterase activity|GO:0071944:cell periphery|GO:0005618:cell wall|GO:0042545:cell wall modification|GO:0009507:chloroplast|GO:0005737:cytoplasm|GO:0050829:defense response to Gram-negative bacterium|GO:0005576:extracellular region|GO:0016021:integral component of membrane|GO:0005634:nucleus|GO:0045490:pectin catabolic process|GO:0045488:pectin metabolic process|GO:0030599:pecti…
PM01G04330	1.42	0.7	1.3	1.67	0.98	0.65	0.83	0.26	GO:0008097:5S rRNA binding
PM01G04340	0.83	0.76	0.86	1.7	3.28	0.94	0.1	0.1	GO:0009294:DNA mediated transformation|GO:0005794:Golgi apparatus|GO:0000139:Golgi membrane|GO:0008150:biological_process|GO:0071555:cell wall organization|GO:0016759:cellulose synthase activity|GO:0047259:glucomannan 4-beta-mannosyltransferase activity|GO:0046527:glucosyltransferase activity|GO:0016021:integral component of membrane|GO:0051753:mannan synthase activity|GO:0010192:mucilage biosynt…
PM01G04350	16.47	7.57	80.44	23.52	15.5	13.55	5.09	2.31
PM01G04360	6.16	7.44	7.77	4.95	3.54	2.69	3.02	1.22	GO:0009507:chloroplast|GO:0004519:endonuclease activity|GO:0003676:nucleic acid binding|GO:0005634:nucleus
PM01G04370	177.88	147.49	45.13	44.96	41.3	47.91	12.47	18.55	GO:0008150:biological_process|GO:0003674:molecular_function|GO:0005634:nucleus|GO:0005886:plasma membrane
PM01G04380	173.74	54.43	8.28	42.89	17.93	2.05	97.56	0.33	GO:0008150:biological_process|GO:0003674:molecular_function
PM01G04390	5.05	3.82	6.98	5.58	8.42	5.84	4.48	1.45	GO:0003856:3-dehydroquinate synthase activity|GO:0009073:aromatic amino acid family biosynthetic process|GO:0009507:chloroplast|GO:0055114:oxidation-reduction process|GO:0016491:oxidoreductase activity
PM01G04400	14.68	41.58	17.83	22.41	17.29	19.77	15.37	80.09	GO:0005524:ATP binding|GO:0009507:chloroplast|GO:0005737:cytoplasm|GO:0016301:kinase activity|GO:0005634:nucleus|GO:0016310:phosphorylation|GO:0005886:plasma membrane|GO:0009506:plasmodesma|GO:0006468:protein phosphorylation|GO:0004674:protein serine/threonine kinase activity|GO:0004713:protein tyrosine kinase activity
PM01G04410	0	0.02	0	0	0	0	0	0	GO:0005737:cytoplasm|GO:0005829:cytosol|GO:0000145:exocyst|GO:0006887:exocytosis|GO:0070062:extracellular exosome|GO:0005739:mitochondrion|GO:0005634:nucleus|GO:0045335:phagocytic vesicle|GO:0005886:plasma membrane|GO:0090406:pollen tube|GO:0005515:protein binding|GO:0006904:vesicle docking involved in exocytosis
PM01G04420	61.75	34.57	4.43	1.61	2.32	3.34	0.58	0.03	GO:0009507:chloroplast|GO:0009534:chloroplast thylakoid|GO:0009535:chloroplast thylakoid membrane|GO:0016021:integral component of membrane|GO:0016020:membrane
PM01G04430	10.49	4.2	0.02	1.27	33.53	11.03	1.38	0	GO:0003677:DNA binding|GO:0009738:abscisic acid-activated signaling pathway|GO:0048826:cotyledon morphogenesis|GO:0009965:leaf morphogenesis|GO:0009788:negative regulation of abscisic acid-activated signaling pathway|GO:0030308:negative regulation of cell growth|GO:0005634:nucleus|GO:0048573:photoperiodism, flowering|GO:0045893:positive regulation of transcription, DNA-templated|GO:0080022:primar…
PM01G04440	0.14	0.08	0	0	0.38	0	0.04	0	GO:0005884:actin filament|GO:0051017:actin filament bundle assembly|GO:0045454:cell redox homeostasis|GO:0009902:chloroplast relocation|GO:0009055:electron carrier activity|GO:0005634:nucleus|GO:0005886:plasma membrane|GO:0009506:plasmodesma|GO:0015035:protein disulfide oxidoreductase activity
PM01G04450	43.05	110.59	122.77	155.61	82.9	61.67	6.24	3.14	GO:0005794:Golgi apparatus|GO:0042951:arbutin transmembrane transporter activity|GO:0015225:biotin transporter activity|GO:0034219:carbohydrate transmembrane transport|GO:0015144:carbohydrate transmembrane transporter activity|GO:0098655:cation transmembrane transport|GO:0005801:cis-Golgi network|GO:0009908:flower development|GO:0042946:glucoside transport|GO:0005887:integral component of plasma …
PM01G04460	83.21	106.7	34.96	42.88	62.93	115.69	46.54	16.13	GO:0031463:Cul3-RING ubiquitin ligase complex|GO:0008150:biological_process|GO:0009507:chloroplast|GO:0005829:cytosol|GO:0003674:molecular_function|GO:0005634:nucleus|GO:0005777:peroxisome|GO:0016567:protein ubiquitination|GO:0004842:ubiquitin-protein transferase activity
PM01G04470	0.05	0.05	0	0.02	0	0.02	0	0.37
PM01G04480	7.05	7.94	7.8	10.44	13.38	10.84	9.64	15.7	GO:0045177:apical part of cell|GO:0001825:blastocyst formation|GO:0007420:brain development|GO:0007155:cell adhesion|GO:0042995:cell projection|GO:0008283:cell proliferation|GO:0071363:cellular response to growth factor stimulus|GO:0071347:cellular response to interleukin-1|GO:0071222:cellular response to lipopolysaccharide|GO:0071407:cellular response to organic cyclic compound|GO:0005737:cytopl…
PM01G04490	0	0	0	0	0	0.03	0	0
PM01G04500	1.92	1.37	0.79	0.7	2.08	0.61	3.08	0.13	GO:0003677:DNA binding|GO:0009742:brassinosteroid mediated signaling pathway|GO:0005737:cytoplasm|GO:0010086:embryonic root morphogenesis|GO:0009740:gibberellic acid mediated signaling pathway|GO:0005634:nucleus|GO:0009640:photomorphogenesis|GO:0005515:protein binding|GO:0046983:protein dimerization activity|GO:0040008:regulation of growth|GO:0080113:regulation of seed growth|GO:0048510:regulatio…
PM01G04510	26.21	32.76	22.39	74.83	53.32	59.33	70.33	95.04	GO:0008453:alanine-glyoxylate transaminase activity|GO:0019544:arginine catabolic process to glutamate|GO:0042802:identical protein binding|GO:0016020:membrane|GO:0005739:mitochondrion|GO:0009853:photorespiration|GO:0030170:pyridoxal phosphate binding|GO:0046686:response to cadmium ion|GO:0005774:vacuolar membrane|GO:0008270:zinc ion binding
PM01G04520	8.36	16.06	27.39	29.26	30.3	27.22	11.07	38.91	GO:0003723:RNA binding|GO:0006405:RNA export from nucleus|GO:0006952:defense response|GO:0009870:defense response signaling pathway, resistance gene-dependent|GO:0006406:mRNA export from nucleus|GO:0051028:mRNA transport|GO:0009910:negative regulation of flower development|GO:0005635:nuclear envelope|GO:0008139:nuclear localization sequence binding|GO:0031965:nuclear membrane|GO:0044614:nuclear p…
PM01G04530	11.23	1.29	10.07	1.18	2.41	1.85	0.7	26.12
PM01G04540	0.03	0	0	0.01	0.01	0.09	0.16	0.12	GO:0005886:plasma membrane|GO:0006468:protein phosphorylation|GO:0004674:protein serine/threonine kinase activity
PM01G04550	0	0	0	0	0	0.04	0	0	GO:0005886:plasma membrane|GO:0006468:protein phosphorylation|GO:0004674:protein serine/threonine kinase activity
PM01G04560	0	0	0	0	0	0.35	0.02	0.07	GO:0008150:biological_process|GO:0007050:cell cycle arrest|GO:0005575:cellular_component|GO:0005737:cytoplasm|GO:0005829:cytosol|GO:0070062:extracellular exosome|GO:0003674:molecular_function|GO:0005886:plasma membrane|GO:0005515:protein binding
PM01G04570	0.17	0	0	0	0	0	10.52	0
PM01G04580	0	0	0	0	0	0	0	0	GO:0005618:cell wall|GO:0004869:cysteine-type endopeptidase inhibitor activity|GO:0006952:defense response|GO:0005576:extracellular region
PM01G04590	0	0	0	0	0	0	0	0
PM01G04600	0.1	0	0	0	0	0	0.09	0	GO:0005618:cell wall|GO:0004869:cysteine-type endopeptidase inhibitor activity|GO:0006952:defense response|GO:0005576:extracellular region
PM01G04610	0.28	0.04	0	0	0	0	0.82	0.05
PM01G04620	0.04	0	0	0	0	0	0	0
PM01G04630	0	0	0	0	0	0.05	0	0	GO:0052689:carboxylic ester hydrolase activity|GO:0005737:cytoplasm|GO:0008474:palmitoyl-(protein) hydrolase activity|GO:0002084:protein depalmitoylation
PM01G04640	0	0	0	0	0	0	0	0
PM01G04650	0	0	0	0	0	0	0	0	GO:0052689:carboxylic ester hydrolase activity|GO:0005737:cytoplasm|GO:0008474:palmitoyl-(protein) hydrolase activity|GO:0002084:protein depalmitoylation
PM01G04660	4.13	1.59	0.24	2.04	9.24	7.43	4.92	0.75	GO:0048437:floral organ development|GO:0043161:proteasome-mediated ubiquitin-dependent protein catabolic process|GO:0061630:ubiquitin protein ligase activity
PM01G04670	7.9	7.42	9.23	12.51	10.37	10.03	14.91	14.81	GO:0003723:RNA binding|GO:0034605:cellular response to heat|GO:0009507:chloroplast|GO:0005737:cytoplasm|GO:0010494:cytoplasmic stress granule|GO:0005829:cytosol|GO:0006397:mRNA processing|GO:0000166:nucleotide binding|GO:0005634:nucleus|GO:0008143:poly(A) binding|GO:0009735:response to cytokinin|GO:0010193:response to ozone
PM01G04680	5.09	0.98	0.43	0.58	3.48	1.44	2.06	0.24	GO:0008150:biological_process|GO:0003674:molecular_function|GO:0005634:nucleus
PM01G04690	1.89	1.33	1.12	3.1	4.37	6.02	4.65	4.65	GO:0047517:1,4-beta-D-xylan synthase activity|GO:0005794:Golgi apparatus|GO:0000139:Golgi membrane|GO:0008150:biological_process|GO:0003824:catalytic activity|GO:0042546:cell wall biogenesis|GO:0071555:cell wall organization|GO:0005768:endosome|GO:0015020:glucuronosyltransferase activity|GO:0010417:glucuronoxylan biosynthetic process|GO:0080116:glucuronoxylan glucuronosyltransferase activity|GO:0…
PM01G04700	0.13	0	0	0	0.18	0.19	0	0.05	GO:0003677:DNA binding|GO:0005634:nucleus|GO:0045893:positive regulation of transcription, DNA-templated|GO:0006355:regulation of transcription, DNA-templated|GO:0043565:sequence-specific DNA binding|GO:0003700:transcription factor activity, sequence-specific DNA binding|GO:0044212:transcription regulatory region DNA binding|GO:0006351:transcription, DNA-templated
PM01G04710	19.24	20.26	27.65	32.03	34.05	40.57	27.99	61.74	GO:0044208:'de novo' AMP biosynthetic process|GO:0046040:IMP metabolic process|GO:0004019:adenylosuccinate synthase activity|GO:0005737:cytoplasm
PM01G04720	3.34	4.36	4.88	3.64	2.93	3.07	2.47	9.2	GO:0006396:RNA processing|GO:0009507:chloroplast|GO:0032259:methylation|GO:0008168:methyltransferase activity|GO:0016783:sulfurtransferase activity|GO:0004808:tRNA (5-methylaminomethyl-2-thiouridylate)-methyltransferase activity|GO:0002143:tRNA wobble position uridine thiolation
PM01G04730	11.68	9.92	1.66	2.54	3.35	1.8	19.22	0.66	GO:0008150:biological_process|GO:0003674:molecular_function
PM01G04740	14.2	31.23	37.81	73.55	54.75	23.87	85.56	4.33	GO:0016602:CCAAT-binding factor complex|GO:0003677:DNA binding|GO:0009738:abscisic acid-activated signaling pathway|GO:0009785:blue light signaling pathway|GO:0009793:embryo development ending in seed dormancy|GO:0055046:microgametogenesis|GO:0045892:negative regulation of transcription, DNA-templated|GO:0005654:nucleoplasm|GO:0005634:nucleus|GO:0009555:pollen development|GO:0032993:protein-DNA c…
PM01G04750	6.46	1.74	4.22	2.51	4.84	1.67	6.33	0.3	GO:0016021:integral component of membrane|GO:0005743:mitochondrial inner membrane|GO:0006839:mitochondrial transport|GO:0005739:mitochondrion|GO:0003735:structural constituent of ribosome|GO:0006412:translation|GO:0055085:transmembrane transport|GO:0006810:transport
PM01G04760	10.5	11.4	8.46	15.79	15.47	17.96	31.19	13.42	GO:0006528:asparagine metabolic process|GO:0005813:centrosome|GO:0009507:chloroplast|GO:0009570:chloroplast stroma|GO:0005737:cytoplasm|GO:0005829:cytosol|GO:0070062:extracellular exosome|GO:0006541:glutamine metabolic process|GO:0016787:hydrolase activity|GO:0016810:hydrolase activity, acting on carbon-nitrogen (but not peptide) bonds|GO:0006108:malate metabolic process|GO:0005739:mitochondrion|…
PM01G04770	3.09	3.62	9.26	12.24	6.52	4.99	4.84	1.55	GO:0005524:ATP binding|GO:0003677:DNA binding|GO:0015074:DNA integration|GO:0006310:DNA recombination|GO:0003887:DNA-directed DNA polymerase activity|GO:0003723:RNA binding|GO:0004523:RNA-DNA hybrid ribonuclease activity|GO:0006278:RNA-dependent DNA biosynthetic process|GO:0003964:RNA-directed DNA polymerase activity|GO:0004190:aspartic-type endopeptidase activity|GO:0003824:catalytic activity|GO…
PM01G04780	0.17	0.02	0.14	0.4	0.7	0.22	0.19	0.56
PM01G04790	2.24	0.71	1.64	1.81	9.23	0.52	0.63	0.08	GO:0060918:auxin transport|GO:0009734:auxin-activated signaling pathway|GO:0009630:gravitropism|GO:0003674:molecular_function|GO:0005634:nucleus|GO:0005886:plasma membrane|GO:0080113:regulation of seed growth|GO:0009733:response to auxin
PM01G04800	0.66	0.42	0.64	0.89	1.87	2.77	0.75	0.9	GO:0003677:DNA binding|GO:0005730:nucleolus|GO:0005634:nucleus|GO:0005515:protein binding|GO:0006355:regulation of transcription, DNA-templated|GO:0005673:transcription factor TFIIE complex|GO:0000991:transcription factor activity, core RNA polymerase II binding|GO:0006367:transcription initiation from RNA polymerase II promoter|GO:0006351:transcription, DNA-templated|GO:0003743:translation initi…
PM01G04810	0.55	0.01	0	0.09	0.05	0.03	0.02	0.49	GO:0003677:DNA binding|GO:0000981:RNA polymerase II transcription factor activity, sequence-specific DNA binding|GO:0060774:auxin mediated signaling pathway involved in phyllotactic patterning|GO:0009734:auxin-activated signaling pathway|GO:0030154:cell differentiation|GO:0009873:ethylene-activated signaling pathway|GO:0009908:flower development|GO:0007276:gamete generation|GO:0060772:leaf phyllo…
PM01G04820	0	0	0	0	0	0	0	0
PM01G04830	0.63	0.83	1.44	1.22	0.78	1.93	0.57	0.93	GO:0005737:cytoplasm|GO:0008270:zinc ion binding
PM01G04840	0	0	0	0	0.06	0	0	0	GO:0006464:cellular protein modification process|GO:0005737:cytoplasm|GO:0000398:mRNA splicing, via spliceosome|GO:0005634:nucleus|GO:0031386:protein tag
PM01G04850	0	0	0	0	0	0	0.21	0
PM01G04860	0.11	0.07	0.26	0.33	0.39	0.16	0.23	0.49
PM01G04870	0	0	0.02	0	0	0	0	0.09	GO:0005887:integral component of plasma membrane|GO:0015116:sulfate transmembrane transporter activity
PM01G04880	0.11	0.02	0	0.07	0.09	0.03	0.19	0	GO:0006474:N-terminal protein amino acid acetylation|GO:0008150:biological_process|GO:0016021:integral component of membrane|GO:0003674:molecular_function|GO:0004596:peptide alpha-N-acetyltransferase activity|GO:0031248:protein acetyltransferase complex
PM01G04890	12.61	36.57	7.46	7.43	10.37	24.02	0.52	0.83	GO:0005524:ATP binding|GO:0015662:ATPase activity, coupled to transmembrane movement of ions, phosphorylative mechanism|GO:0019829:cation-transporting ATPase activity|GO:0009535:chloroplast thylakoid membrane|GO:0005375:copper ion transmembrane transporter activity|GO:0006825:copper ion transport|GO:0004008:copper-exporting ATPase activity|GO:0043682:copper-transporting ATPase activity|GO:0016021…
PM01G04900	30.71	38.4	18.85	7.13	6.34	11.32	0.07	0.16	GO:0008150:biological_process|GO:0005575:cellular_component|GO:0009507:chloroplast|GO:0009941:chloroplast envelope|GO:0010020:chloroplast fission|GO:0009535:chloroplast thylakoid membrane|GO:0009793:embryo development ending in seed dormancy|GO:0016021:integral component of membrane|GO:0016020:membrane|GO:0003674:molecular_function|GO:0090143:nucleoid organization|GO:0005886:plasma membrane|GO:00…
PM01G04910	19.3	17.61	18.85	22.45	21.17	22.41	20.05	9.69	GO:0005095:GTPase inhibitor activity|GO:0009742:brassinosteroid mediated signaling pathway|GO:0016247:channel regulator activity|GO:0009870:defense response signaling pathway, resistance gene-dependent|GO:0010476:gibberellin mediated signaling pathway|GO:0005886:plasma membrane|GO:0048639:positive regulation of developmental growth|GO:0005515:protein binding
PM01G04920	0.9	0.08	0.13	0.19	0.73	0.48	0.36	0.01	GO:0005737:cytoplasm|GO:0006749:glutathione metabolic process|GO:0004364:glutathione transferase activity
PM01G04930	0.33	0.31	0.07	0.71	0.1	0.19	0.88	0.05	GO:0016787:hydrolase activity
PM01G04940	5.91	1.26	0.12	0.74	0.75	3.08	2.83	0.07	GO:0016787:hydrolase activity
PM01G04950	3.77	3.08	0.16	0.5	0.52	2.42	3.1	0.22	GO:0016787:hydrolase activity
PM01G04960	0.62	0.85	0.3	1.32	1.65	0.75	1.8	5.98	GO:0005524:ATP binding|GO:0008150:biological_process|GO:0006464:cellular protein modification process|GO:0005575:cellular_component|GO:0009507:chloroplast|GO:0005737:cytoplasm|GO:0005829:cytosol|GO:0008340:determination of adult lifespan|GO:0005783:endoplasmic reticulum|GO:0016874:ligase activity|GO:0003674:molecular_function|GO:0000166:nucleotide binding|GO:0030017:sarcomere|GO:0055120:striated …
PM01G04970	2.01	1.24	0.94	3.5	5.28	1.83	9.56	33.72	GO:0005524:ATP binding|GO:0008150:biological_process|GO:0006464:cellular protein modification process|GO:0005575:cellular_component|GO:0009507:chloroplast|GO:0005737:cytoplasm|GO:0005829:cytosol|GO:0016874:ligase activity|GO:0003674:molecular_function|GO:0000166:nucleotide binding|GO:0004835:tubulin-tyrosine ligase activity
PM01G04980	6.14	2.68	1.24	3.3	4.23	1.64	30.4	0.15	GO:0005524:ATP binding|GO:0009507:chloroplast|GO:0042742:defense response to bacterium|GO:0016021:integral component of membrane|GO:0016301:kinase activity|GO:0016310:phosphorylation|GO:0005886:plasma membrane|GO:0005515:protein binding|GO:0004672:protein kinase activity|GO:0006468:protein phosphorylation|GO:0004674:protein serine/threonine kinase activity
PM01G04990	2.5	0.33	0.44	1.04	0.82	0.61	0.54	1.23	GO:0006952:defense response
PM01G05000	0.17	0.06	0.02	0.13	0.32	0.21	0.1	0.16
PM01G05010	7.42	19.55	9.76	8.13	5.16	6.71	10.33	2.09	GO:0009901:anther dehiscence|GO:0048653:anther development|GO:0009507:chloroplast|GO:0009941:chloroplast envelope|GO:0009570:chloroplast stroma|GO:0009535:chloroplast thylakoid membrane|GO:0005737:cytoplasm|GO:0006952:defense response|GO:0040007:growth|GO:0009695:jasmonic acid biosynthetic process|GO:0010311:lateral root formation|GO:0016165:linoleate 13S-lipoxygenase activity|GO:1990136:linoleat…
PM01G05020	13.42	17.76	32.53	38.53	31.46	33.06	25.75	34.01	GO:0015297:antiporter activity|GO:0008150:biological_process|GO:0070588:calcium ion transmembrane transport|GO:0005432:calcium:sodium antiporter activity|GO:0008324:cation transmembrane transporter activity|GO:0006812:cation transport|GO:0015491:cation:cation antiporter activity|GO:0030003:cellular cation homeostasis|GO:0030659:cytoplasmic vesicle membrane|GO:0005829:cytosol|GO:0012505:endomembra…
PM01G05030	20.02	8.37	19.48	32.68	18.74	9.19	33.47	0.04	GO:0008150:biological_process|GO:0005575:cellular_component|GO:0005737:cytoplasm|GO:0003674:molecular_function|GO:0005634:nucleus
PM01G05040	28.66	42.9	53.2	58.88	35.66	42.24	42.09	21.94	GO:0005524:ATP binding|GO:0009507:chloroplast|GO:0003684:damaged DNA binding|GO:0006298:mismatch repair|GO:0005515:protein binding
PM01G05050	40.34	16.42	26.47	34.69	44.47	35.78	57.91	38.23	GO:0038095:Fc-epsilon receptor signaling pathway|GO:0000165:MAPK cascade|GO:0051059:NF-kappaB binding|GO:0038061:NIK/NF-kappaB signaling|GO:0003723:RNA binding|GO:0050852:T cell receptor signaling pathway|GO:0060071:Wnt signaling pathway, planar cell polarity pathway|GO:0031145:anaphase-promoting complex-dependent catabolic process|GO:0002479:antigen processing and presentation of exogenous pepti…
PM01G05060	0.23	0.15	0.02	0.08	0.06	0.17	0.25	0.02
PM01G05070	2.58	2.6	3.49	4.63	4.83	5.24	3.87	2.38	GO:0005783:endoplasmic reticulum|GO:0005789:endoplasmic reticulum membrane|GO:0016021:integral component of membrane|GO:0000030:mannosyltransferase activity|GO:0048868:pollen tube development|GO:0010483:pollen tube reception|GO:0006486:protein glycosylation|GO:0016757:transferase activity, transferring glycosyl groups
PM01G05080	10.44	48.88	0.1	0.86	0.48	5.35	2.74	0.35	GO:1903507:negative regulation of nucleic acid-templated transcription|GO:0005634:nucleus|GO:0031347:regulation of defense response|GO:2000022:regulation of jasmonic acid mediated signaling pathway|GO:0009611:response to wounding|GO:0003714:transcription corepressor activity
PM01G05090	98.55	222.05	2.42	20.5	3.79	19.17	27.82	17.63	GO:1903507:negative regulation of nucleic acid-templated transcription|GO:0005634:nucleus|GO:0031347:regulation of defense response|GO:2000022:regulation of jasmonic acid mediated signaling pathway|GO:0009611:response to wounding|GO:0003714:transcription corepressor activity
PM01G05100	820.44	1176.41	60.77	174.21	73.17	31.29	68.1	2.55	GO:1903507:negative regulation of nucleic acid-templated transcription|GO:0005634:nucleus|GO:0031347:regulation of defense response|GO:2000022:regulation of jasmonic acid mediated signaling pathway|GO:0009611:response to wounding|GO:0003714:transcription corepressor activity
PM01G05110	1.16	1.72	2.37	2.33	1.88	1.91	1.55	3.41	GO:0009507:chloroplast|GO:0009793:embryo development ending in seed dormancy|GO:0005576:extracellular region|GO:0016787:hydrolase activity|GO:0010102:lateral root morphogenesis|GO:0005739:mitochondrion|GO:0008285:negative regulation of cell proliferation|GO:0005634:nucleus|GO:0006979:response to oxidative stress
PM01G05120	72.28	32.97	5.95	11.48	30.88	58.58	0	12.41	GO:0042335:cuticle development|GO:0022626:cytosolic ribosome|GO:0005783:endoplasmic reticulum|GO:0005789:endoplasmic reticulum membrane|GO:0009913:epidermal cell differentiation|GO:0006633:fatty acid biosynthetic process|GO:0009922:fatty acid elongase activity|GO:0030497:fatty acid elongation|GO:0016021:integral component of membrane|GO:0008610:lipid biosynthetic process|GO:0016020:membrane|GO:00…
PM01G05130	0	0	0	0	0	0	0	0
PM01G05140	1.34	4	3.8	3.41	3.09	3.3	4.06	1.52	GO:0007623:circadian rhythm|GO:0010018:far-red light signaling pathway|GO:0005634:nucleus|GO:0009506:plasmodesma|GO:0042753:positive regulation of circadian rhythm|GO:0045893:positive regulation of transcription, DNA-templated|GO:0005515:protein binding|GO:0010017:red or far-red light signaling pathway|GO:0009585:red, far-red light phototransduction|GO:0006355:regulation of transcription, DNA-tem…
PM01G05150	12.04	103.23	15.08	8.3	5.79	16.17	8.34	31.03	GO:0008150:biological_process|GO:0005575:cellular_component|GO:0009507:chloroplast|GO:0005829:cytosol|GO:0003674:molecular_function|GO:0005634:nucleus
PM01G05160	0.04	0	0	0	0	0.08	0.29	0.02	GO:0004499:N,N-dimethylaniline monooxygenase activity|GO:0050661:NADP binding|GO:0071456:cellular response to hypoxia|GO:0009507:chloroplast|GO:0009870:defense response signaling pathway, resistance gene-dependent|GO:0010204:defense response signaling pathway, resistance gene-independent|GO:0042742:defense response to bacterium|GO:0050832:defense response to fungus|GO:0050660:flavin adenine dinuc…
PM01G05170	23.96	68.15	44.14	38.33	20.63	39.57	23.62	21.56	GO:0005794:Golgi apparatus|GO:0070772:PAS complex|GO:0008150:biological_process|GO:0007010:cytoskeleton organization|GO:0005829:cytosol|GO:0016311:dephosphorylation|GO:0000329:fungal-type vacuole membrane|GO:0016021:integral component of membrane|GO:0005739:mitochondrion|GO:0034399:nuclear periphery|GO:0005634:nucleus|GO:0046856:phosphatidylinositol dephosphorylation|GO:0043813:phosphatidylinosit…
PM01G05180	72.6	46.31	21.4	43.75	96.81	74.89	110.73	298	GO:0030686:90S preribosome|GO:0022627:cytosolic small ribosomal subunit|GO:0000447:endonucleolytic cleavage in ITS1 to separate SSU-rRNA from 5.8S rRNA and LSU-rRNA from tricistronic rRNA transcript (SSU-rRNA, 5.8S rRNA, LSU-rRNA)|GO:0000461:endonucleolytic cleavage to generate mature 3'-end of SSU-rRNA from (SSU-rRNA, 5.8S rRNA, LSU-rRNA)|GO:0006407:rRNA export from nucleus|GO:0000028:ribosomal …
PM01G05190	0.17	0.11	0.05	0.12	0.23	2.84	0.42	3.72	GO:0005794:Golgi apparatus|GO:0012505:endomembrane system|GO:0005768:endosome|GO:0005576:extracellular region|GO:0046527:glucosyltransferase activity|GO:0006664:glycolipid metabolic process|GO:0016021:integral component of membrane|GO:0005802:trans-Golgi network
PM01G05200	20.65	10.73	14.92	18.9	32.33	24.62	37.54	19.68	GO:0003723:RNA binding|GO:0005737:cytoplasm|GO:0005829:cytosol|GO:0016282:eukaryotic 43S preinitiation complex|GO:0033290:eukaryotic 48S preinitiation complex|GO:0005852:eukaryotic translation initiation factor 3 complex|GO:0070062:extracellular exosome|GO:0001731:formation of translation preinitiation complex|GO:0016020:membrane|GO:0005634:nucleus|GO:0005515:protein binding|GO:0006446:regulation…
PM01G05210	0.3	0.11	0.34	0.76	0.87	0.93	0.6	3.25	GO:0003723:RNA binding|GO:0008150:biological_process|GO:0009507:chloroplast|GO:1900865:chloroplast RNA modification|GO:0031425:chloroplast RNA processing|GO:0010588:cotyledon vascular tissue pattern formation|GO:0048366:leaf development|GO:0010305:leaf vascular tissue pattern formation|GO:0006397:mRNA processing|GO:0080156:mitochondrial mRNA modification|GO:0005739:mitochondrion|GO:0003674:molecu…
PM01G05220	14.11	13.21	510.2	121.44	33.74	14.3	47.69	1.47	GO:0003677:DNA binding|GO:0008219:cell death|GO:0071369:cellular response to ethylene stimulus|GO:0071497:cellular response to freezing|GO:0071456:cellular response to hypoxia|GO:0009736:cytokinin-activated signaling pathway|GO:0005737:cytoplasm|GO:0009873:ethylene-activated signaling pathway|GO:0010286:heat acclimation|GO:0005622:intracellular|GO:0048366:leaf development|GO:0005634:nucleus|GO:00…
PM01G05230	4.89	3.71	83.93	39.35	16.92	7.7	88.87	0.61	GO:0003700:transcription factor activity, sequence-specific DNA binding
PM01G05240	1.98	2.29	1.75	1.77	1.97	0.56	64.53	0.37	GO:0003677:DNA binding|GO:0008219:cell death|GO:0071369:cellular response to ethylene stimulus|GO:0071456:cellular response to hypoxia|GO:0048825:cotyledon development|GO:0009736:cytokinin-activated signaling pathway|GO:0005737:cytoplasm|GO:0006952:defense response|GO:0050832:defense response to fungus|GO:0009873:ethylene-activated signaling pathway|GO:0010286:heat acclimation|GO:0009864:induced …
PM01G05250	353.88	106.52	146.53	104.25	89.77	15.57	98.19	21.06	GO:0003677:DNA binding|GO:0008219:cell death|GO:0071369:cellular response to ethylene stimulus|GO:0071456:cellular response to hypoxia|GO:0005737:cytoplasm|GO:0006952:defense response|GO:0050832:defense response to fungus|GO:0070483:detection of hypoxia|GO:0009873:ethylene-activated signaling pathway|GO:0010286:heat acclimation|GO:0005622:intracellular|GO:0005634:nucleus|GO:0005886:plasma membran…
PM01G05260	2.32	7.32	0.49	0.99	0.33	2.42	0	0.32	GO:0008150:biological_process|GO:0005575:cellular_component|GO:0000932:cytoplasmic mRNA processing body|GO:0010494:cytoplasmic stress granule|GO:0005739:mitochondrion|GO:0003674:molecular_function|GO:0005634:nucleus|GO:0009737:response to abscisic acid|GO:0010162:seed dormancy process
PM01G05270	0.74	0.65	0.75	1.86	1.44	1.9	0.93	0.39	GO:0043140:ATP-dependent 3'-5' DNA helicase activity|GO:0003677:DNA binding|GO:0032508:DNA duplex unwinding|GO:0006310:DNA recombination|GO:0006260:DNA replication|GO:0006284:base-excision repair|GO:0005694:chromosome|GO:0005737:cytoplasm|GO:0006302:double-strand break repair|GO:0009378:four-way junction helicase activity|GO:0005634:nucleus
PM01G05280	0	0	0	0.03	0	0.03	0	0
PM01G05290	7.97	16.88	2.58	12.6	22.84	28.17	9.66	10.93	GO:0005524:ATP binding|GO:0000902:cell morphogenesis|GO:0007623:circadian rhythm|GO:0005829:cytosol|GO:0005576:extracellular region|GO:0048437:floral organ development|GO:0016021:integral component of membrane|GO:0016301:kinase activity|GO:0048366:leaf development|GO:0010305:leaf vascular tissue pattern formation|GO:0005634:nucleus|GO:0016310:phosphorylation|GO:0048481:plant ovule development|GO:…
PM01G05300	0.03	0.11	0.05	0.09	0.08	0.03	0.03	0.35
PM01G05310	22.94	35.7	53.27	47.2	29.03	23.45	20.06	46.83	GO:0052887:7,9,9'-tricis-neurosporene:quinone oxidoreductase activity|GO:0052889:9,9'-di-cis-zeta-carotene desaturation to 7,9,7',9'-tetra-cis-lycopene|GO:0052886:9,9'-dicis-carotene:quinone oxidoreductase activity|GO:0001716:L-amino-acid oxidase activity|GO:0006559:L-phenylalanine catabolic process|GO:0052904:N1-acetylspermidine:oxygen oxidoreductase (3-acetamidopropanal-forming) activity|GO:005…
PM01G05320	0.11	0.17	0.06	0.4	0.46	0.6	0.31	0.62	GO:0005623:cell|GO:0009904:chloroplast accumulation movement|GO:0009903:chloroplast avoidance movement|GO:0005829:cytosol|GO:0005886:plasma membrane|GO:0005515:protein binding
PM01G05330	2.56	2.84	0.23	0.57	2.96	9.1	3.61	0.09	GO:0005794:Golgi apparatus|GO:0000139:Golgi membrane|GO:0009058:biosynthetic process|GO:0016051:carbohydrate biosynthetic process|GO:0071555:cell wall organization|GO:0046513:ceramide biosynthetic process|GO:0005737:cytoplasm|GO:0005829:cytosol|GO:0009792:embryo development ending in birth or egg hatching|GO:0005768:endosome|GO:0070062:extracellular exosome|GO:0005576:extracellular region|GO:0015…
PM01G05340	0.03	0.01	0.11	0.16	0.01	11.34	0.02	0.01	GO:0005524:ATP binding|GO:0016021:integral component of membrane|GO:0016301:kinase activity|GO:0016310:phosphorylation|GO:0005886:plasma membrane|GO:0006468:protein phosphorylation|GO:0004674:protein serine/threonine kinase activity|GO:0007165:signal transduction|GO:0004714:transmembrane receptor protein tyrosine kinase activity
PM01G05350	2.46	0.2	0	0.29	1.28	0.62	1.73	0	GO:0003677:DNA binding|GO:0009567:double fertilization forming a zygote and endosperm|GO:0009553:embryo sac development|GO:0005634:nucleus|GO:0006355:regulation of transcription, DNA-templated|GO:0003700:transcription factor activity, sequence-specific DNA binding|GO:0006351:transcription, DNA-templated
PM01G05360	0.02	0	0	0	0	0.01	0.07	0
PM01G05370	0	0	0	0	0	0.01	0	0	GO:0008150:biological_process|GO:0003824:catalytic activity|GO:0050662:coenzyme binding|GO:0045552:dihydrokaempferol 4-reductase activity|GO:0005783:endoplasmic reticulum|GO:0047886:farnesol dehydrogenase activity|GO:0016487:farnesol metabolic process|GO:0003674:molecular_function|GO:0009788:negative regulation of abscisic acid-activated signaling pathway|GO:0005634:nucleus|GO:0005886:plasma memb…
PM01G05380	0.02	0	0	0	0	0.04	0.21	0	GO:0003854:3-beta-hydroxy-delta5-steroid dehydrogenase activity|GO:0008150:biological_process|GO:0003824:catalytic activity|GO:0005618:cell wall|GO:0008203:cholesterol metabolic process|GO:0050662:coenzyme binding|GO:0045552:dihydrokaempferol 4-reductase activity|GO:0005783:endoplasmic reticulum|GO:0047886:farnesol dehydrogenase activity|GO:0016487:farnesol metabolic process|GO:0016021:integral c…
PM01G05390	17.97	10.81	5.21	10.62	5.38	3.08	3.05	16.89	GO:0003854:3-beta-hydroxy-delta5-steroid dehydrogenase activity|GO:0070403:NAD+ binding|GO:0008150:biological_process|GO:0003824:catalytic activity|GO:0005618:cell wall|GO:0006695:cholesterol biosynthetic process|GO:0008203:cholesterol metabolic process|GO:0050662:coenzyme binding|GO:0005829:cytosol|GO:0045552:dihydrokaempferol 4-reductase activity|GO:0005783:endoplasmic reticulum|GO:0005789:endo…
PM01G05400	12.97	9.08	15.62	14.7	10.58	11.67	11.08	4.85	GO:0003854:3-beta-hydroxy-delta5-steroid dehydrogenase activity|GO:0004022:alcohol dehydrogenase (NAD) activity|GO:0008150:biological_process|GO:0003824:catalytic activity|GO:0005618:cell wall|GO:0005575:cellular_component|GO:0008203:cholesterol metabolic process|GO:0045551:cinnamyl-alcohol dehydrogenase activity|GO:0050662:coenzyme binding|GO:0045552:dihydrokaempferol 4-reductase activity|GO:000…
PM01G05410	3.97	0.44	0.04	0.56	2.23	1.22	2.35	0.54	GO:0006260:DNA replication|GO:0006270:DNA replication initiation|GO:0003688:DNA replication origin binding|GO:0000082:G1/S transition of mitotic cell cycle|GO:0005813:centrosome|GO:0000785:chromatin|GO:0000939:condensed chromosome inner kinetochore|GO:0000792:heterochromatin|GO:0016020:membrane|GO:0003674:molecular_function|GO:0000122:negative regulation of transcription from RNA polymerase II pr…
PM01G05420	0.21	0.11	0.35	0.72	0.63	0.78	0.51	1.1	GO:0003723:RNA binding|GO:0008150:biological_process|GO:0009507:chloroplast|GO:1900865:chloroplast RNA modification|GO:0031425:chloroplast RNA processing|GO:0010588:cotyledon vascular tissue pattern formation|GO:0016554:cytidine to uridine editing|GO:0009793:embryo development ending in seed dormancy|GO:0048366:leaf development|GO:0010305:leaf vascular tissue pattern formation|GO:0006397:mRNA pro…
PM01G05430	1.77	4.39	5.3	6.28	5.57	6.01	6.56	14.16	GO:0006505:GPI anchor metabolic process|GO:0009792:embryo development ending in birth or egg hatching|GO:0005783:endoplasmic reticulum|GO:0030198:extracellular matrix organization|GO:0016787:hydrolase activity|GO:0016788:hydrolase activity, acting on ester bonds|GO:0016021:integral component of membrane|GO:0005622:intracellular|GO:0006886:intracellular protein transport|GO:0006629:lipid metabolic…
PM01G05440	15.33	9.44	11.78	14.46	11.87	7.48	15.83	9.68	GO:0008150:biological_process|GO:0005575:cellular_component|GO:0003674:molecular_function
PM01G05450	0.04	0.12	0.24	0.19	0.16	0.1	0.09	0.06	GO:0005528:FK506 binding|GO:0061077:chaperone-mediated protein folding|GO:0005789:endoplasmic reticulum membrane|GO:0003755:peptidyl-prolyl cis-trans isomerase activity
PM01G05460	0.12	0	0.01	0.04	0.01	1.05	0.02	1.95	GO:0016410:N-acyltransferase activity|GO:0047634:agmatine N4-coumaroyltransferase activity|GO:0090431:alkyl caffeate ester biosynthetic process|GO:0010252:auxin homeostasis|GO:0090430:caffeoyl-CoA: alcohol caffeoyl transferase activity|GO:0052325:cell wall pectin biosynthetic process|GO:0010143:cutin biosynthetic process|GO:0005737:cytoplasm|GO:0005829:cytosol|GO:0033494:ferulate metabolic proces…
PM01G05470	0.02	0	0	0	0	0.02	0	0.02	GO:0036468:L-dopa decarboxylase activity|GO:0006559:L-phenylalanine catabolic process|GO:0015842:aminergic neurotransmitter loading into synaptic vesicle|GO:0016597:amino acid binding|GO:0004058:aromatic-L-amino-acid decarboxylase activity|GO:0030424:axon|GO:0007420:brain development|GO:0016831:carboxy-lyase activity|GO:0019752:carboxylic acid metabolic process|GO:0003824:catalytic activity|GO:00…
PM01G05480	0.86	2.22	1.65	1.44	0.79	0.68	0.74	0.04	GO:0015995:chlorophyll biosynthetic process|GO:0009507:chloroplast|GO:0005829:cytosol|GO:0004489:methylenetetrahydrofolate reductase (NAD(P)H) activity|GO:0006730:one-carbon metabolic process|GO:0006779:porphyrin-containing compound biosynthetic process|GO:0006782:protoporphyrinogen IX biosynthetic process|GO:0006780:uroporphyrinogen III biosynthetic process|GO:0004852:uroporphyrinogen-III syntha…
PM01G05490	7.23	6.39	9.45	17.49	10.34	5.98	8.2	9.36	GO:0016020:membrane
PM01G05500	15.69	19.51	16.07	53.75	25.19	0.04	5.45	0.2	GO:0003677:DNA binding|GO:0009742:brassinosteroid mediated signaling pathway|GO:0030154:cell differentiation|GO:0071249:cellular response to nitrate|GO:0005737:cytoplasm|GO:0010582:floral meristem determinacy|GO:0048438:floral whorl development|GO:0009908:flower development|GO:0048527:lateral root development|GO:0048574:long-day photoperiodism, flowering|GO:0010076:maintenance of floral meristem …
PM01G05510	3.83	3.64	5.33	5.86	5.84	5.68	6.62	5.66	GO:0000813:ESCRT I complex|GO:0006914:autophagy|GO:0008150:biological_process|GO:0048306:calcium-dependent protein binding|GO:0005575:cellular_component|GO:0016197:endosomal transport|GO:0005768:endosome|GO:0010008:endosome membrane|GO:0070062:extracellular exosome|GO:0075733:intracellular transport of virus|GO:0031902:late endosome membrane|GO:0016020:membrane|GO:0003674:molecular_function|GO:00…
PM01G05520	0.58	0.12	0.24	0.58	1.62	0.43	0.67	0.25	GO:0000813:ESCRT I complex|GO:0005634:nucleus|GO:0005515:protein binding|GO:0015031:protein transport
PM01G05530	41.72	12.8	0.01	0.82	22.41	2.59	5.01	0.04	GO:0048046:apoplast|GO:0004190:aspartic-type endopeptidase activity|GO:0005618:cell wall|GO:0005576:extracellular region|GO:0009505:plant-type cell wall|GO:0030163:protein catabolic process|GO:0006508:proteolysis|GO:0009627:systemic acquired resistance
PM01G05540	16.24	7.86	7.88	12.55	15.34	12.69	14.96	11.16	GO:0009507:chloroplast|GO:0031972:chloroplast intermembrane space|GO:0005507:copper ion binding|GO:0070207:protein homotrimerization|GO:0010038:response to metal ion
PM01G05550	16.73	7.01	15.3	15.38	18.44	17.08	11.77	33.38	GO:0005666:DNA-directed RNA polymerase III complex|GO:0001056:RNA polymerase III activity|GO:0009507:chloroplast|GO:0005737:cytoplasm|GO:0009793:embryo development ending in seed dormancy|GO:0017126:nucleologenesis|GO:0005634:nucleus|GO:0051302:regulation of cell division
PM01G05560	5.05	8.77	17.63	18.74	17.47	15.46	8.51	37.22	GO:0008150:biological_process|GO:0003674:molecular_function|GO:0005634:nucleus
PM01G05570	9.79	7.99	11.87	10.97	10.24	10.37	8.18	24.76	GO:0080008:Cul4-RING E3 ubiquitin ligase complex|GO:0008150:biological_process|GO:0005975:carbohydrate metabolic process|GO:0005623:cell|GO:0055082:cellular chemical homeostasis|GO:0032869:cellular response to insulin stimulus|GO:0005575:cellular_component|GO:0005737:cytoplasm|GO:0005829:cytosol|GO:0004857:enzyme inhibitor activity|GO:0005925:focal adhesion|GO:0006006:glucose metabolic process|GO…
PM01G05580	7.44	13.41	4.6	2.51	4.05	2.1	5.76	0.55	GO:0008150:biological_process|GO:0005575:cellular_component
PM01G05590	3.32	1.13	1.44	2.58	11.47	6.98	19.64	12.21	GO:0010011:auxin binding|GO:0009734:auxin-activated signaling pathway|GO:0071249:cellular response to nitrate|GO:0006952:defense response|GO:0000822:inositol hexakisphosphate binding|GO:0048527:lateral root development|GO:0005634:nucleus|GO:0010152:pollen maturation|GO:0080022:primary root development|GO:0016567:protein ubiquitination|GO:0048443:stamen development|GO:0006511:ubiquitin-dependent p…
PM01G05600	85.9	137.24	44.96	21.33	12.88	13.2	47.7	23.16	GO:0008150:biological_process|GO:0005575:cellular_component|GO:0009507:chloroplast|GO:0005737:cytoplasm|GO:0005829:cytosol|GO:0009793:embryo development ending in seed dormancy|GO:0051567:histone H3-K9 methylation|GO:0098755:maintenance of seed dormancy by absisic acid|GO:0003674:molecular_function|GO:0005634:nucleus|GO:0010482:regulation of epidermal cell division|GO:0010029:regulation of seed g…
PM01G05610	17.59	10.57	18.31	12.14	11.36	12.56	11.91	18.04	GO:0005794:Golgi apparatus|GO:0000139:Golgi membrane|GO:0005789:endoplasmic reticulum membrane|GO:0016021:integral component of membrane|GO:0016020:membrane|GO:0003674:molecular_function|GO:0005886:plasma membrane|GO:1901002:positive regulation of response to salt stress|GO:0015031:protein transport|GO:0047484:regulation of response to osmotic stress|GO:0043182:vacuolar sequestering of sodium ion…
PM01G05620	0.52	1.87	0.9	8.07	0.13	0	1.97	0	GO:0009507:chloroplast|GO:0010184:cytokinin transport|GO:0005737:cytoplasm|GO:0016021:integral component of membrane|GO:0005887:integral component of plasma membrane|GO:0016020:membrane|GO:0005345:purine nucleobase transmembrane transporter activity|GO:0006863:purine nucleobase transport|GO:0015211:purine nucleoside transmembrane transporter activity|GO:0009624:response to nematode
PM01G05630	6.37	0.73	0	0.1	0.67	0.72	10.44	0	GO:0009507:chloroplast|GO:0010184:cytokinin transport|GO:0005737:cytoplasm|GO:0016021:integral component of membrane|GO:0005887:integral component of plasma membrane|GO:0016020:membrane|GO:0005345:purine nucleobase transmembrane transporter activity|GO:0006863:purine nucleobase transport|GO:0015211:purine nucleoside transmembrane transporter activity|GO:0009624:response to nematode|GO:0006810:tra…
PM01G05640	0.9	0.01	0	0	0	0	4.36	0.02	GO:0009507:chloroplast|GO:0010184:cytokinin transport|GO:0005737:cytoplasm|GO:0016021:integral component of membrane|GO:0005887:integral component of plasma membrane|GO:0016020:membrane|GO:0005345:purine nucleobase transmembrane transporter activity|GO:0006863:purine nucleobase transport|GO:0015211:purine nucleoside transmembrane transporter activity|GO:0009624:response to nematode|GO:0006810:tra…
PM01G05650	0.8	1.44	1.82	1.74	0.48	0.52	0.56	0
PM01G05660	66.32	85.1	37.1	9.28	4.79	18.11	6.65	13.05	GO:0015297:antiporter activity|GO:0006855:drug transmembrane transport|GO:0015238:drug transmembrane transporter activity|GO:0009835:fruit ripening|GO:0016021:integral component of membrane|GO:0016020:membrane|GO:0005886:plasma membrane|GO:0005215:transporter activity
PM01G05670	0.79	0.61	0.1	0.31	0.25	0.11	2.81	0.05	GO:0016567:protein ubiquitination|GO:0004842:ubiquitin-protein transferase activity
PM01G05680	4.41	1.67	0	0.28	4.46	0.4	5.79	0.02	GO:0003677:DNA binding|GO:0016597:amino acid binding|GO:0010052:guard cell differentiation|GO:0010377:guard cell fate commitment|GO:0051782:negative regulation of cell division|GO:0005634:nucleus|GO:0045597:positive regulation of cell differentiation|GO:0045893:positive regulation of transcription, DNA-templated|GO:0005515:protein binding|GO:0046983:protein dimerization activity|GO:0006355:regula…
PM01G05690	120.59	276.38	2.89	31.1	33.46	9.57	113.87	1.03
PM01G05700	4.48	5.25	0.1	0.64	3.96	7.74	8.94	0.07	GO:0003677:DNA binding|GO:0009738:abscisic acid-activated signaling pathway|GO:0048826:cotyledon morphogenesis|GO:0009965:leaf morphogenesis|GO:0007275:multicellular organism development|GO:0009788:negative regulation of abscisic acid-activated signaling pathway|GO:0030308:negative regulation of cell growth|GO:0005634:nucleus|GO:0048573:photoperiodism, flowering|GO:0045893:positive regulation of …
PM01G05710	62.69	130.04	21.31	21.28	8.76	6.59	17.25	0.21
PM01G05720	0.06	0.04	0.06	0	0	3.51	0	0.01	GO:0005737:cytoplasm|GO:0003674:molecular_function|GO:0007131:reciprocal meiotic recombination|GO:0000795:synaptonemal complex
PM01G05730	0.16	0.09	0.04	0.02	0.03	0.5	4.01	0.41	GO:0005794:Golgi apparatus|GO:0051903:S-(hydroxymethyl)glutathione dehydrogenase activity|GO:0004022:alcohol dehydrogenase (NAD) activity|GO:0045333:cellular respiration|GO:0005737:cytoplasm|GO:0005829:cytosol|GO:0006069:ethanol oxidation|GO:0070062:extracellular exosome|GO:0005504:fatty acid binding|GO:0046294:formaldehyde catabolic process|GO:0018467:formaldehyde dehydrogenase activity|GO:00468…
PM01G05740	3.1	0.22	0.04	0.07	0.11	3.05	1.71	0.01	GO:0005794:Golgi apparatus|GO:0051903:S-(hydroxymethyl)glutathione dehydrogenase activity|GO:0080007:S-nitrosoglutathione reductase activity|GO:0004022:alcohol dehydrogenase (NAD) activity|GO:0004024:alcohol dehydrogenase activity, zinc-dependent|GO:0006066:alcohol metabolic process|GO:0000947:amino acid catabolic process to alcohol via Ehrlich pathway|GO:0045333:cellular respiration|GO:0005737:c…
PM01G05750	2.66	0.81	0.02	0.23	0.39	1.93	0.4	0.07	GO:0005794:Golgi apparatus|GO:0051903:S-(hydroxymethyl)glutathione dehydrogenase activity|GO:0004022:alcohol dehydrogenase (NAD) activity|GO:0045333:cellular respiration|GO:0005737:cytoplasm|GO:0005829:cytosol|GO:0006069:ethanol oxidation|GO:0070062:extracellular exosome|GO:0005504:fatty acid binding|GO:0046294:formaldehyde catabolic process|GO:0018467:formaldehyde dehydrogenase activity|GO:00057…
PM01G05760	2.93	0.16	0	0.09	4.05	1.85	0	6.49	GO:0005794:Golgi apparatus|GO:0051903:S-(hydroxymethyl)glutathione dehydrogenase activity|GO:0080007:S-nitrosoglutathione reductase activity|GO:0004022:alcohol dehydrogenase (NAD) activity|GO:0006066:alcohol metabolic process|GO:0045333:cellular respiration|GO:0005737:cytoplasm|GO:0005829:cytosol|GO:0006069:ethanol oxidation|GO:0004552:octanol dehydrogenase activity|GO:0055114:oxidation-reduction…
PM01G05770	2.93	1.63	2.15	2.08	3.19	1.8	2.83	1.08	GO:0030007:cellular potassium ion homeostasis|GO:0006883:cellular sodium ion homeostasis|GO:1901001:negative regulation of response to salt stress|GO:0043433:negative regulation of sequence-specific DNA binding transcription factor activity|GO:0005634:nucleus|GO:0005515:protein binding
PM01G05780	7.06	11.48	6.6	2.42	4.32	4.58	0.03	4.39	GO:0046428:1,4-dihydroxy-2-naphthoate octaprenyltransferase activity|GO:0009507:chloroplast|GO:0031969:chloroplast membrane|GO:0016021:integral component of membrane|GO:0009772:photosynthetic electron transport in photosystem II|GO:0042372:phylloquinone biosynthetic process|GO:0005886:plasma membrane|GO:0010236:plastoquinone biosynthetic process|GO:0004659:prenyltransferase activity
PM01G05790	1.11	0.34	0.01	0.19	1.47	0.56	0.79	3.57
PM01G05800	24.92	6.43	1.44	11.1	43.22	18.97	9.92	1	GO:0005768:endosome
PM01G05810	2.46	3.62	1.37	0.31	1.08	2.79	2.2	2.35	GO:0070286:axonemal dynein complex assembly|GO:0005930:axoneme|GO:0008150:biological_process|GO:0051301:cell division|GO:0005814:centriole|GO:0005813:centrosome|GO:0005929:cilium|GO:0060271:cilium morphogenesis|GO:0003341:cilium movement|GO:0005737:cytoplasm|GO:0071907:determination of digestive tract left/right asymmetry|GO:0071910:determination of liver left/right asymmetry|GO:0035469:determina…
PM01G05820	12.28	9.57	11.34	13.26	8.66	19.77	9.5	18.77	GO:0008343:adult feeding behavior|GO:0007610:behavior|GO:0001662:behavioral fear response|GO:0048149:behavioral response to ethanol|GO:0005575:cellular_component|GO:0008234:cysteine-type peptidase activity|GO:0005737:cytoplasm|GO:0016787:hydrolase activity|GO:0005634:nucleus|GO:0008233:peptidase activity|GO:0005515:protein binding|GO:0016579:protein deubiquitination|GO:0006508:proteolysis|GO:0032…
PM01G05830	12.14	4.39	4.37	3.56	3.31	4.09	6.21	11.87	GO:0008150:biological_process|GO:0009507:chloroplast|GO:0016021:integral component of membrane|GO:0016020:membrane|GO:0003674:molecular_function|GO:0005634:nucleus
PM01G05840	3.2	4.12	23.44	36.3	23.94	20.05	11.23	13	GO:0005634:nucleus|GO:0045944:positive regulation of transcription from RNA polymerase II promoter|GO:0043565:sequence-specific DNA binding|GO:0001077:transcriptional activator activity, RNA polymerase II core promoter proximal region sequence-specific binding
PM01G05850	16.31	9.81	13.13	10.39	15.2	15.56	15.57	10.12	GO:0016021:integral component of membrane|GO:0005743:mitochondrial inner membrane|GO:0006839:mitochondrial transport|GO:0005739:mitochondrion|GO:0009536:plastid|GO:0003735:structural constituent of ribosome|GO:0006412:translation|GO:0055085:transmembrane transport|GO:0006810:transport|GO:0005215:transporter activity
PM01G05860	0.51	0.39	0.4	0.58	0.6	0.54	0.94	0.23	GO:0005524:ATP binding|GO:0003824:catalytic activity|GO:0005737:cytoplasm|GO:0005829:cytosol|GO:0005576:extracellular region|GO:0052746:inositol phosphorylation|GO:0047325:inositol tetrakisphosphate 1-kinase activity|GO:0032957:inositol trisphosphate metabolic process|GO:0052726:inositol-1,3,4-trisphosphate 5-kinase activity|GO:0052725:inositol-1,3,4-trisphosphate 6-kinase activity|GO:0005622:int…
PM01G05870	16.07	6.42	1.27	3.67	3.68	4.64	0.53	0.16	GO:0008150:biological_process|GO:0003674:molecular_function|GO:0005634:nucleus
PM01G05880	7.31	5.25	1.02	3.2	0.4	1.89	23.82	2.54	GO:0005525:GTP binding|GO:0003924:GTPase activity|GO:0005794:Golgi apparatus|GO:0000139:Golgi membrane|GO:0005829:cytosol|GO:0005768:endosome|GO:0006891:intra-Golgi vesicle-mediated transport|GO:0006886:intracellular protein transport|GO:0016020:membrane|GO:0006913:nucleocytoplasmic transport|GO:0005886:plasma membrane|GO:0009506:plasmodesma|GO:0005515:protein binding|GO:0042147:retrograde transp…
PM01G05890	0.03	0.05	0	0.01	0.09	1.78	0	0.07	GO:0003723:RNA binding|GO:0008150:biological_process|GO:0005575:cellular_component|GO:0009507:chloroplast|GO:0005737:cytoplasm|GO:0005829:cytosol|GO:0003729:mRNA binding|GO:0046872:metal ion binding|GO:1902039:negative regulation of seed dormancy process|GO:0000288:nuclear-transcribed mRNA catabolic process, deadenylation-dependent decay|GO:0005634:nucleus|GO:0006417:regulation of translation
PM01G05900	0	0	0.05	0.01	0	2.18	0	0	GO:0008150:biological_process|GO:0005829:cytosol|GO:0009814:defense response, incompatible interaction|GO:0016021:integral component of membrane|GO:0003674:molecular_function|GO:0005634:nucleus|GO:0005886:plasma membrane|GO:0009506:plasmodesma|GO:0010116:positive regulation of abscisic acid biosynthetic process|GO:0009737:response to abscisic acid|GO:0006970:response to osmotic stress|GO:1902074:…
PM01G05910	6.25	2.26	0.32	0.84	2.04	2.45	1.72	0.14	GO:0003677:DNA binding|GO:0008219:cell death|GO:0071472:cellular response to salt stress|GO:0009736:cytokinin-activated signaling pathway|GO:0005737:cytoplasm|GO:0009873:ethylene-activated signaling pathway|GO:0010286:heat acclimation|GO:0005634:nucleus|GO:0005886:plasma membrane|GO:0045893:positive regulation of transcription, DNA-templated|GO:0005515:protein binding|GO:0010017:red or far-red li…
PM01G05920	4.09	2.67	3.01	4.35	7.4	4.95	5.69	3.68	GO:0035312:5'-3' exodeoxyribonuclease activity|GO:0004534:5'-3' exoribonuclease activity|GO:0003677:DNA binding|GO:0071897:DNA biosynthetic process|GO:0006260:DNA replication|GO:0003887:DNA-directed DNA polymerase activity|GO:0090503:RNA phosphodiester bond hydrolysis, exonucleolytic|GO:0008150:biological_process|GO:0003824:catalytic activity|GO:0005737:cytoplasm|GO:0016311:dephosphorylation|GO:0…
PM01G05930	0.04	0.01	0.74	0.49	1.29	37.92	0.03	0.13	GO:0051603:proteolysis involved in cellular protein catabolic process|GO:0004185:serine-type carboxypeptidase activity
PM01G05940	0.98	0.02	0	0.42	1.12	0.23	0	0.01	GO:0008150:biological_process|GO:0005575:cellular_component|GO:0003674:molecular_function|GO:0005634:nucleus|GO:0005886:plasma membrane
PM01G05950	99.6	40.16	31.58	42.91	75.27	50.46	86.01	33.99	GO:0005524:ATP binding|GO:0008137:NADH dehydrogenase (ubiquinone) activity|GO:0003954:NADH dehydrogenase activity|GO:0097190:apoptotic signaling pathway|GO:0035458:cellular response to interferon-beta|GO:0071300:cellular response to retinoic acid|GO:0009507:chloroplast|GO:0005737:cytoplasm|GO:0009793:embryo development ending in seed dormancy|GO:0070062:extracellular exosome|GO:0097191:extrinsic …
PM01G05960	1.33	0.67	2.15	2.63	2.77	0.56	1.8	0.44	GO:0008150:biological_process|GO:0005575:cellular_component|GO:0005576:extracellular region|GO:0016020:membrane|GO:0003674:molecular_function
PM01G05970	23.95	21.74	118.17	70.79	43.24	51.36	11.55	45.34	GO:0008150:biological_process|GO:0003824:catalytic activity|GO:0071482:cellular response to light stimulus|GO:0005575:cellular_component|GO:0009507:chloroplast|GO:0009570:chloroplast stroma|GO:0016311:dephosphorylation|GO:0016787:hydrolase activity|GO:0008152:metabolic process|GO:0046872:metal ion binding|GO:0005739:mitochondrion|GO:0035970:peptidyl-threonine dephosphorylation|GO:0004721:phosphop…
PM01G05980	40.13	19.81	1.16	4.16	40.19	7.93	26.61	1.72	GO:0031225:anchored component of membrane|GO:0046658:anchored component of plasma membrane|GO:0042335:cuticle development|GO:0005576:extracellular region|GO:0016021:integral component of membrane|GO:0008289:lipid binding|GO:0006869:lipid transport|GO:0016020:membrane|GO:0008233:peptidase activity|GO:0005886:plasma membrane|GO:0006508:proteolysis
PM01G05990	318.15	138.75	20.16	21.46	50.75	39.62	55.7	175.61	GO:0008150:biological_process|GO:0016036:cellular response to phosphate starvation|GO:0005575:cellular_component|GO:0005737:cytoplasm|GO:0005829:cytosol|GO:0042742:defense response to bacterium|GO:0050832:defense response to fungus|GO:0051607:defense response to virus|GO:0009793:embryo development ending in seed dormancy|GO:0006021:inositol biosynthetic process|GO:0043647:inositol phosphate metab…
PM01G06000	0.01	0	0	0	0	0.02	0	0.27	GO:0005737:cytoplasm|GO:0045121:membrane raft|GO:0005739:mitochondrion|GO:0005730:nucleolus|GO:0005654:nucleoplasm|GO:0005634:nucleus|GO:0045211:postsynaptic membrane|GO:0016579:protein deubiquitination|GO:0048316:seed development|GO:0004843:thiol-dependent ubiquitin-specific protease activity|GO:0006511:ubiquitin-dependent protein catabolic process
PM01G06010	20.51	120.02	75.9	46.99	38.1	53.95	40.27	79.16	GO:0005634:nucleus|GO:0006355:regulation of transcription, DNA-templated|GO:0043565:sequence-specific DNA binding|GO:0003700:transcription factor activity, sequence-specific DNA binding
PM01G06020	4.06	1.93	0.75	0.66	3.21	4.96	2.58	2.08	GO:0008150:biological_process|GO:0005575:cellular_component|GO:0007476:imaginal disc-derived wing morphogenesis|GO:0046872:metal ion binding|GO:0003674:molecular_function|GO:0005730:nucleolus|GO:0005634:nucleus
PM01G06030	0.01	0	0	0	0	0.13	0.05	0.03	GO:0061158:3'-UTR-mediated mRNA destabilization|GO:0043186:P granule|GO:0003723:RNA binding|GO:0008150:biological_process|GO:0005575:cellular_component|GO:0005737:cytoplasm|GO:0005829:cytosol|GO:0051607:defense response to virus|GO:0009819:drought recovery|GO:0040022:feminization of hermaphroditic germ-line|GO:0005622:intracellular|GO:0003730:mRNA 3'-UTR binding|GO:0003729:mRNA binding|GO:0007140…
PM01G06040	0.1	0.01	0.01	0.09	0.11	0.06	0.04	0.08
PM01G06050	0.01	0	0	0.02	0	0.13	0	0.1	GO:0043186:P granule|GO:0003723:RNA binding|GO:0008595:anterior/posterior axis specification, embryo|GO:0048149:behavioral response to ethanol|GO:0008150:biological_process|GO:0001709:cell fate determination|GO:0016477:cell migration|GO:0005575:cellular_component|GO:0009507:chloroplast|GO:0005737:cytoplasm|GO:0005829:cytosol|GO:0048813:dendrite morphogenesis|GO:0040022:feminization of hermaphrodi…
PM01G06060	2.32	1.21	3.78	4.42	3.71	3.35	4.42	3.22	GO:0030154:cell differentiation|GO:0009908:flower development|GO:0003674:molecular_function|GO:0005634:nucleus|GO:0005515:protein binding|GO:0010228:vegetative to reproductive phase transition of meristem
PM01G06070	0	0	0	0	0	0	0	0	GO:0052904:N1-acetylspermidine:oxygen oxidoreductase (3-acetamidopropanal-forming) activity|GO:0052903:N1-acetylspermine:oxygen oxidoreductase (3-acetamidopropanal-forming) activity|GO:0052895:N1-acetylspermine:oxygen oxidoreductase (N1-acetylspermidine-forming) activity|GO:0008150:biological_process|GO:0005575:cellular_component|GO:0005737:cytoplasm|GO:0050660:flavin adenine dinucleotide binding…
PM01G06080	0.02	0	0	0.01	0.01	0.04	0	0.02	GO:0033193:Lsd1/2 complex|GO:0052895:N1-acetylspermine:oxygen oxidoreductase (N1-acetylspermidine-forming) activity|GO:0009300:antisense RNA transcription|GO:0005575:cellular_component|GO:0050660:flavin adenine dinucleotide binding|GO:0071515:genetic imprinting at mating-type locus|GO:0033169:histone H3-K9 demethylation|GO:0032454:histone demethylase activity (H3-K9 specific)|GO:0005739:mitochond…
PM01G06090	55.49	30.55	0.27	32.51	10.56	8.26	0	0	GO:0052895:N1-acetylspermine:oxygen oxidoreductase (N1-acetylspermidine-forming) activity|GO:0005575:cellular_component|GO:0050660:flavin adenine dinucleotide binding|GO:0005739:mitochondrion|GO:0052894:norspermine:oxygen oxidoreductase activity|GO:0005634:nucleus|GO:0055114:oxidation-reduction process|GO:0016491:oxidoreductase activity|GO:0005777:peroxisome|GO:0006598:polyamine catabolic process…
PM01G06100	11.29	10.87	6.96	11.43	11.86	10.95	15.65	8.34	GO:0008150:biological_process|GO:0005575:cellular_component|GO:0003674:molecular_function|GO:0005634:nucleus
PM01G06110	5.56	2.11	0.09	0.4	4	0.43	5.8	0	GO:0009507:chloroplast|GO:0030198:extracellular matrix organization|GO:0005576:extracellular region|GO:0016021:integral component of membrane|GO:0016020:membrane|GO:0046872:metal ion binding|GO:0007275:multicellular organism development|GO:0055114:oxidation-reduction process|GO:0005886:plasma membrane|GO:0009506:plasmodesma
PM01G06120	9.1	5.24	9.87	11.46	9.06	8.49	18.9	4.39	GO:0008080:N-acetyltransferase activity|GO:0006474:N-terminal protein amino acid acetylation|GO:0005575:cellular_component|GO:0043234:protein complex
PM01G06130	34.82	18.39	25.12	22.31	20.3	18.76	21.5	23.82	GO:0015450:P-P-bond-hydrolysis-driven protein transmembrane transporter activity|GO:0009507:chloroplast|GO:0009941:chloroplast envelope|GO:0016021:integral component of membrane|GO:0005743:mitochondrial inner membrane|GO:0005744:mitochondrial inner membrane presequence translocase complex|GO:0005739:mitochondrion|GO:0015266:protein channel activity|GO:0033365:protein localization to organelle|GO:…
PM01G06140	0.1	0	0	0.02	0	0.01	0.91	0	GO:0009507:chloroplast|GO:0030198:extracellular matrix organization|GO:0005576:extracellular region|GO:0016021:integral component of membrane|GO:0016020:membrane|GO:0046872:metal ion binding|GO:0007275:multicellular organism development|GO:0055114:oxidation-reduction process|GO:0005886:plasma membrane|GO:0009506:plasmodesma
PM01G06150	0.55	0.15	0	0.03	0	0	3.71	0.07	GO:0009507:chloroplast|GO:0030198:extracellular matrix organization|GO:0005576:extracellular region|GO:0016021:integral component of membrane|GO:0016020:membrane|GO:0046872:metal ion binding|GO:0007275:multicellular organism development|GO:0055114:oxidation-reduction process|GO:0005886:plasma membrane|GO:0009506:plasmodesma
PM01G06160	0	0	0	0	0	0	0	0
PM01G06170	12.62	7.02	4.88	12.81	3.35	5.49	137.66	0.92	GO:0009507:chloroplast|GO:0030198:extracellular matrix organization|GO:0005576:extracellular region|GO:0016021:integral component of membrane|GO:0016020:membrane|GO:0046872:metal ion binding|GO:0007275:multicellular organism development|GO:0055114:oxidation-reduction process|GO:0005886:plasma membrane|GO:0009506:plasmodesma
PM01G06180	2.67	0.72	1.04	0.01	0	0.42	0.14	0.03	GO:0010285:L,L-diaminopimelate aminotransferase activity|GO:0004069:L-aspartate:2-oxoglutarate aminotransferase activity|GO:0006532:aspartate biosynthetic process|GO:0008150:biological_process|GO:0009507:chloroplast|GO:0009570:chloroplast stroma|GO:0005507:copper ion binding|GO:0005829:cytosol|GO:0042742:defense response to bacterium|GO:0010150:leaf senescence|GO:0009089:lysine biosynthetic proce…
PM01G06190	0.04	0	0	0	0	0.03	0	0	GO:0005887:integral component of plasma membrane|GO:0015116:sulfate transmembrane transporter activity
PM01G06200	17.58	42.44	6.37	39.45	44.51	2.16	6.44	13.55	GO:0005887:integral component of plasma membrane|GO:0015116:sulfate transmembrane transporter activity
PM01G06210	13.06	20.12	7.04	9.27	7.76	11.85	5.89	6.62	GO:0005887:integral component of plasma membrane|GO:0015116:sulfate transmembrane transporter activity
PM01G06220	0.95	1.32	2.97	1.98	4.52	1.29	11.16	0.26	GO:0005887:integral component of plasma membrane|GO:0015116:sulfate transmembrane transporter activity
PM01G06230	1.91	2.5	4.31	3.47	1.78	1.25	1.33	3.39
PM01G06240	14.63	12.23	10.22	4.45	11.03	10.49	1.82	2.54
PM01G06250	15.84	5.76	1.81	8.73	10.14	33.84	0.14	23.59	GO:0008137:NADH dehydrogenase (ubiquinone) activity|GO:0045333:cellular respiration|GO:0005576:extracellular region|GO:0010227:floral organ abscission|GO:0016021:integral component of membrane|GO:0016020:membrane|GO:0005747:mitochondrial respiratory chain complex I|GO:0005886:plasma membrane|GO:0005515:protein binding|GO:0080167:response to karrikin
PM01G06260	13.32	4.87	0	0.16	3.78	0.64	2.7	0.09	GO:0010265:SCF complex assembly|GO:0019005:SCF ubiquitin ligase complex|GO:0031146:SCF-dependent proteasomal ubiquitin-dependent protein catabolic process|GO:0009740:gibberellic acid mediated signaling pathway|GO:0005634:nucleus|GO:0009939:positive regulation of gibberellic acid mediated signaling pathway|GO:0005515:protein binding|GO:0016567:protein ubiquitination|GO:0009937:regulation of gibber…
PM01G06270	7.24	10.25	0.85	3.52	1.86	0.38	55.66	0.62	GO:0016407:acetyltransferase activity|GO:0008652:cellular amino acid biosynthetic process|GO:0009970:cellular response to sulfate starvation|GO:0009507:chloroplast|GO:0019344:cysteine biosynthetic process|GO:0006535:cysteine biosynthetic process from serine|GO:0005737:cytoplasm|GO:0005829:cytosol|GO:0005739:mitochondrion|GO:0005634:nucleus|GO:0005515:protein binding|GO:0046686:response to cadmium…
PM01G06280	85.86	86.28	73.55	26.63	22.65	43.12	6.01	4.99	GO:0003723:RNA binding|GO:0009507:chloroplast|GO:0009570:chloroplast stroma|GO:0016787:hydrolase activity|GO:0005739:mitochondrion|GO:0005840:ribosome|GO:0015935:small ribosomal subunit|GO:0003735:structural constituent of ribosome|GO:0006412:translation
PM01G06290	3.34	2.88	9.27	10.19	8.11	6.11	10.21	11.34	GO:0003677:DNA binding|GO:0006352:DNA-templated transcription, initiation|GO:0017025:TBP-class protein binding|GO:0001047:core promoter binding|GO:0046872:metal ion binding|GO:0005730:nucleolus|GO:0005654:nucleoplasm|GO:0005634:nucleus|GO:0009527:plastid outer membrane|GO:0005515:protein binding|GO:0000182:rDNA binding|GO:0006355:regulation of transcription, DNA-templated|GO:0042795:snRNA transcr…
PM01G06300	4.29	10.52	5.45	26	46.43	38.31	46.81	0.88	GO:0015591:D-ribose transmembrane transporter activity|GO:0015148:D-xylose transmembrane transporter activity|GO:0015144:carbohydrate transmembrane transporter activity|GO:0005354:galactose transmembrane transporter activity|GO:0046323:glucose import|GO:0005355:glucose transmembrane transporter activity|GO:0015168:glycerol transmembrane transporter activity|GO:0035428:hexose transmembrane transpo…
PM01G06310	0.39	0.52	0.2	0.39	0.22	0.38	0.09	235.77	GO:0008150:biological_process|GO:0050832:defense response to fungus|GO:0005576:extracellular region|GO:0045735:nutrient reservoir activity|GO:0009505:plant-type cell wall|GO:0009506:plasmodesma|GO:0009735:response to cytokinin|GO:0009615:response to virus
PM01G06320	3.18	2.89	7.19	10.36	9.51	8.15	8.14	12.73	GO:0008180:COP9 signalosome|GO:0019784:NEDD8-specific protease activity|GO:0010388:cullin deneddylation|GO:0005829:cytosol|GO:0007275:multicellular organism development|GO:0009640:photomorphogenesis|GO:0010971:positive regulation of G2/M transition of mitotic cell cycle|GO:0005515:protein binding|GO:0043234:protein complex|GO:0009585:red, far-red light phototransduction
PM01G06330	5.3	6.17	3.36	2.61	3.35	4.5	1.32	1.08
PM01G06340	6.37	10.18	3.66	5.26	5.3	3.92	13.02	4.07	GO:0003677:DNA binding|GO:0009507:chloroplast|GO:0046872:metal ion binding|GO:0003676:nucleic acid binding|GO:0005634:nucleus|GO:0010260:organ senescence|GO:0048573:photoperiodism, flowering|GO:0045893:positive regulation of transcription, DNA-templated|GO:0005515:protein binding|GO:0009937:regulation of gibberellic acid mediated signaling pathway|GO:0010029:regulation of seed germination|GO:0048…
PM01G06350	3.19	5.13	13.23	11.84	6.35	7.49	10.37	5.53
PM01G06360	0.28	0.09	0.06	0.08	0.22	0.07	4.59	0	GO:0003677:DNA binding|GO:0006281:DNA repair|GO:0008150:biological_process|GO:0030863:cortical cytoskeleton|GO:0005856:cytoskeleton|GO:0009553:embryo sac development|GO:0003674:molecular_function|GO:0045892:negative regulation of transcription, DNA-templated|GO:0005730:nucleolus|GO:0005634:nucleus|GO:0005886:plasma membrane|GO:0005515:protein binding|GO:2000652:regulation of secondary cell wall b…
PM01G06370	8.21	7.13	3.59	1.74	1.16	1.93	0.02	0.6	GO:0005794:Golgi apparatus|GO:0007030:Golgi organization|GO:0030544:Hsp70 protein binding|GO:0007015:actin filament organization|GO:0008150:biological_process|GO:0071483:cellular response to blue light|GO:0009507:chloroplast|GO:0009904:chloroplast accumulation movement|GO:0009903:chloroplast avoidance movement|GO:0030276:clathrin binding|GO:0072318:clathrin coat disassembly|GO:0005737:cytoplasm|G…
PM01G06380	33.49	23.86	35.56	28.29	37.79	40.57	36.33	39.74	GO:0005737:cytoplasm|GO:0004828:serine-tRNA ligase activity|GO:0006434:seryl-tRNA aminoacylation
PM01G06390	1.25	0.96	0.05	0.25	0.89	1.39	0.81	1.5	GO:0006281:DNA repair|GO:0008725:DNA-3-methyladenine glycosylase activity|GO:0006284:base-excision repair|GO:0003824:catalytic activity|GO:0005634:nucleus
PM01G06400	0.49	0.35	0.7	1.13	0.84	1.02	0.77	3.1	GO:0034933:1-hydroxy-6-methoxypyrene methyltransferase activity|GO:0034931:1-hydroxypyrene methyltransferase activity|GO:0018707:1-phenanthrol methyltransferase activity|GO:0052624:2-phytyl-1,4-naphthoquinone methyltransferase activity|GO:0008425:2-polyprenyl-6-methoxy-1,4-benzoquinone methyltransferase activity|GO:0034807:4,5-dihydroxybenzo(a)pyrene methyltransferase activity|GO:0008169:C-methyl…
PM01G06410	6.43	3.62	0.37	1.36	4.05	8.47	4.72	4.35	GO:0008150:biological_process|GO:0042631:cellular response to water deprivation|GO:0005575:cellular_component|GO:0009507:chloroplast|GO:0005737:cytoplasm|GO:0031234:extrinsic component of cytoplasmic side of plasma membrane|GO:0031313:extrinsic component of endosome membrane|GO:0016021:integral component of membrane|GO:0008305:integrin complex|GO:0003674:molecular_function|GO:0005634:nucleus|GO:0…
PM01G06420	2.72	0.41	0.04	0.65	3.74	4.14	0.03	0.9	GO:0008150:biological_process|GO:0009690:cytokinin metabolic process|GO:0003674:molecular_function|GO:0005634:nucleus
PM01G06430	0.08	0.41	0	0	0.01	0.12	0.04	0	GO:0016021:integral component of membrane|GO:0004872:receptor activity|GO:0009725:response to hormone|GO:0009744:response to sucrose
PM01G06440	7.42	10.56	3.46	2.28	1.06	2.42	5.08	0.56	GO:0005737:cytoplasm|GO:0005874:microtubule|GO:0003674:molecular_function|GO:0005634:nucleus
PM01G06450	36.38	19.32	30.4	28.22	20.59	28.5	21.53	46.58	GO:0005829:cytosol|GO:0070449:elongin complex|GO:0005634:nucleus|GO:0032968:positive regulation of transcription elongation from RNA polymerase II promoter|GO:0042787:protein ubiquitination involved in ubiquitin-dependent protein catabolic process|GO:0004842:ubiquitin-protein transferase activity
PM01G06460	236.96	121.61	113.38	185.31	244.4	181.97	220.48	1042.1	GO:0005829:cytosol
PM01G06470	4.87	2.19	0.84	6.91	14.09	13.95	3.24	1.34	GO:0008150:biological_process|GO:0005516:calmodulin binding|GO:0005623:cell|GO:0006879:cellular iron ion homeostasis|GO:0005737:cytoplasm|GO:0090002:establishment of protein localization to plasma membrane|GO:0030097:hemopoiesis|GO:0016020:membrane|GO:0005634:nucleus|GO:0005886:plasma membrane
PM01G06480	5.51	3.43	6.08	8.2	8.8	6.62	8.96	11.22	GO:0006754:ATP biosynthetic process|GO:0007030:Golgi organization|GO:0009060:aerobic respiration|GO:0008150:biological_process|GO:0009507:chloroplast|GO:0004129:cytochrome-c oxidase activity|GO:0005793:endoplasmic reticulum-Golgi intermediate compartment|GO:1902600:hydrogen ion transmembrane transport|GO:0016021:integral component of membrane|GO:0044351:macropinocytosis|GO:0016020:membrane|GO:000…
PM01G06490	34.75	22.46	27.47	30.15	31.86	41.79	31.89	2.82	GO:0019003:GDP binding|GO:0005525:GTP binding|GO:0003924:GTPase activity|GO:0005794:Golgi apparatus|GO:0043014:alpha-tubulin binding|GO:0048487:beta-tubulin binding|GO:0007049:cell cycle|GO:0051301:cell division|GO:0007059:chromosome segregation|GO:0005737:cytoplasm|GO:0005856:cytoskeleton|GO:0005829:cytosol|GO:0051607:defense response to virus|GO:0005768:endosome|GO:0070062:extracellular exosome…
PM01G06500	15.74	14.43	7.6	14.29	26.65	24.31	9.24	4.59	GO:0005794:Golgi apparatus|GO:0005975:carbohydrate metabolic process|GO:0005575:cellular_component|GO:0004553:hydrolase activity, hydrolyzing O-glycosyl compounds|GO:0016021:integral component of membrane|GO:0005634:nucleus
PM01G06510	1.12	0.71	13.81	9.68	7.79	5.77	3.35	51.88	GO:0008150:biological_process|GO:0003674:molecular_function
PM01G06520	3.6	2.82	6.52	7.87	7.04	6.41	4.86	14.55	GO:0016874:ligase activity|GO:0005634:nucleus|GO:0003755:peptidyl-prolyl cis-trans isomerase activity|GO:0006457:protein folding|GO:0000413:protein peptidyl-prolyl isomerization|GO:0000209:protein polyubiquitination|GO:0034450:ubiquitin-ubiquitin ligase activity
PM01G06530	0.41	0.7	1.11	1.48	1.87	1.66	1.1	1.22	GO:0000966:RNA 5'-end processing|GO:0003723:RNA binding|GO:0004016:adenylate cyclase activity|GO:0008150:biological_process|GO:0009793:embryo development ending in seed dormancy|GO:0016020:membrane|GO:0005739:mitochondrion|GO:0003674:molecular_function
PM01G06540	0.22	0.03	0	0	0.08	0.25	1.44	0	GO:0005975:carbohydrate metabolic process|GO:0005618:cell wall|GO:0031176:endo-1,4-beta-xylanase activity|GO:0005576:extracellular region|GO:0004553:hydrolase activity, hydrolyzing O-glycosyl compounds|GO:0045493:xylan catabolic process
PM01G06550	3.68	2.74	8.86	9.31	3.5	4.73	8.5	17.4	GO:0008150:biological_process|GO:0005737:cytoplasm|GO:0003725:double-stranded RNA binding|GO:0016779:nucleotidyltransferase activity|GO:0006450:regulation of translational fidelity|GO:0000049:tRNA binding|GO:0002949:tRNA threonylcarbamoyladenosine modification
PM01G06560	1.87	0.89	2.83	4.49	2.9	4.07	3.86	8.38	GO:0033588:Elongator holoenzyme complex|GO:0008150:biological_process|GO:0005575:cellular_component|GO:0005737:cytoplasm|GO:0003674:molecular_function|GO:0005634:nucleus|GO:0006355:regulation of transcription, DNA-templated|GO:0006351:transcription, DNA-templated|GO:0016746:transferase activity, transferring acyl groups
PM01G06570	0	0.01	0.13	0.06	0	33.7	0.03	0.25	GO:0005975:carbohydrate metabolic process|GO:0005618:cell wall|GO:0031176:endo-1,4-beta-xylanase activity|GO:0005576:extracellular region|GO:0004553:hydrolase activity, hydrolyzing O-glycosyl compounds|GO:0045493:xylan catabolic process
PM01G06580	7.84	0.06	0.02	0.19	0.36	0.39	0.72	0.04	GO:0005975:carbohydrate metabolic process|GO:0005618:cell wall|GO:0031176:endo-1,4-beta-xylanase activity|GO:0005576:extracellular region|GO:0004553:hydrolase activity, hydrolyzing O-glycosyl compounds|GO:0045493:xylan catabolic process
PM01G06590	10.6	3.33	1.21	2.82	6.66	5.57	10.21	0.78	GO:0005524:ATP binding|GO:0004020:adenylylsulfate kinase activity|GO:0009507:chloroplast|GO:0019344:cysteine biosynthetic process|GO:0005829:cytosol|GO:0070814:hydrogen sulfide biosynthetic process|GO:0016301:kinase activity|GO:0048232:male gamete generation|GO:0016310:phosphorylation|GO:0000103:sulfate assimilation|GO:0016772:transferase activity, transferring phosphorus-containing groups
PM01G06600	69.6	49.7	29.83	48.36	79.26	64.39	77.89	27.62	GO:0051027:DNA transport|GO:0005794:Golgi apparatus|GO:0016006:Nebenkern|GO:0009060:aerobic respiration|GO:0006820:anion transport|GO:0006915:apoptotic process|GO:0036444:calcium ion transmembrane import into mitochondrion|GO:0045454:cell redox homeostasis|GO:0005618:cell wall|GO:0015267:channel activity|GO:0009507:chloroplast|GO:0009941:chloroplast envelope|GO:0006952:defense response|GO:0042742…
PM01G06610	1.67	1.4	4.46	5.73	4.09	4.96	5.12	9.53	GO:0005737:cytoplasm|GO:0051536:iron-sulfur cluster binding|GO:0070475:rRNA base methylation|GO:0008649:rRNA methyltransferase activity|GO:0008175:tRNA methyltransferase activity
PM01G06620	8.28	7.52	13.29	12.37	15.38	13.73	4.35	9.31	GO:0008150:biological_process|GO:0003674:molecular_function|GO:0005634:nucleus
PM01G06630	0.77	0.97	3.07	6.19	4.7	3.2	4.74	8.93
PM01G06640	21.43	20.27	62.28	60.18	31.22	53.7	67.65	3.12	GO:0003824:catalytic activity|GO:1902348:cellular response to strigolactone|GO:0005737:cytoplasm|GO:0016787:hydrolase activity|GO:0016788:hydrolase activity, acting on ester bonds|GO:0005634:nucleus|GO:0010223:secondary shoot formation|GO:1901601:strigolactone biosynthetic process
PM01G06650	0.05	0.09	0.08	0.18	0.07	0.21	0	0.13	GO:0000977:RNA polymerase II regulatory region sequence-specific DNA binding|GO:0005634:nucleus|GO:0006357:regulation of transcription from RNA polymerase II promoter|GO:0003700:transcription factor activity, sequence-specific DNA binding
PM01G06660	27.09	194.95	45.38	27.75	15.17	52.33	22.06	2.06	GO:0005524:ATP binding|GO:0070588:calcium ion transmembrane transport|GO:0015085:calcium ion transmembrane transporter activity|GO:0005388:calcium-transporting ATPase activity|GO:0005516:calmodulin binding|GO:0005783:endoplasmic reticulum|GO:0005789:endoplasmic reticulum membrane|GO:0005887:integral component of plasma membrane|GO:0043231:intracellular membrane-bounded organelle|GO:0016020:membra…
PM01G06670	1.24	1.48	0.15	0.97	2.16	2.34	0.82	0.02	GO:0042023:DNA endoreduplication|GO:0000082:G1/S transition of mitotic cell cycle|GO:0000086:G2/M transition of mitotic cell cycle|GO:0005794:Golgi apparatus|GO:0055059:asymmetric neuroblast division|GO:0007049:cell cycle|GO:0051301:cell division|GO:0004693:cyclin-dependent protein serine/threonine kinase activity|GO:0016538:cyclin-dependent protein serine/threonine kinase regulator activity|GO:0…
PM01G06680	1.66	2.08	0.52	1.6	4.19	4.74	3.77	0.69	GO:0003779:actin binding|GO:0030036:actin cytoskeleton organization|GO:0051015:actin filament binding|GO:0030041:actin filament polymerization|GO:0045010:actin nucleation|GO:0051016:barbed-end actin filament capping|GO:0008150:biological_process|GO:0009932:cell tip growth|GO:0005618:cell wall|GO:0005911:cell-cell junction|GO:0005575:cellular_component|GO:0009507:chloroplast|GO:0005737:cytoplasm|G…
PM01G06690	0	0	0	0	0.02	0.03	0	0	GO:0000175:3'-5'-exoribonuclease activity|GO:0030014:CCR4-NOT complex|GO:0000288:nuclear-transcribed mRNA catabolic process, deadenylation-dependent decay
PM01G06700	5.14	8.13	16.4	15.33	11.53	13.1	10.62	8.58	GO:0006307:DNA dealkylation involved in DNA repair|GO:0008150:biological_process|GO:0005575:cellular_component|GO:0003674:molecular_function|GO:0005654:nucleoplasm|GO:0005634:nucleus|GO:0006355:regulation of transcription, DNA-templated|GO:0006351:transcription, DNA-templated
PM01G06710	1.15	0.06	0	0	0.07	0	2.55	0	GO:0001046:core promoter sequence-specific DNA binding|GO:0005634:nucleus|GO:0006366:transcription from RNA polymerase II promoter|GO:0001228:transcriptional activator activity, RNA polymerase II transcription regulatory region sequence-specific binding
PM01G06720	1.08	2.46	6.53	8.05	5.5	4.48	2.93	18.44	GO:0003677:DNA binding|GO:0006281:DNA repair|GO:0005662:DNA replication factor A complex|GO:0016591:DNA-directed RNA polymerase II, holoenzyme|GO:0043765:T/G mismatch-specific endonuclease activity|GO:0009650:UV protection|GO:0000405:bubble DNA binding|GO:0003824:catalytic activity|GO:0006974:cellular response to DNA damage stimulus|GO:0008340:determination of adult lifespan|GO:0003690:double-str…
PM01G06730	0.43	0.57	0.92	1.24	0.92	0.7	0.4	2.22
PM01G06740	43.89	7.75	0.06	1.1	15.83	9.34	24.08	7.91
PM01G06750	0.01	0	0	0	0.01	0	0	0
PM01G06760	7.29	4.9	6.74	11.17	12.23	10.06	10.64	2.62	GO:0012505:endomembrane system|GO:0005576:extracellular region|GO:0020037:heme binding|GO:0016021:integral component of membrane|GO:0016020:membrane|GO:0005496:steroid binding
PM01G06770	0	0	0	0	0	0	0.02	0	GO:0019005:SCF ubiquitin ligase complex|GO:0031146:SCF-dependent proteasomal ubiquitin-dependent protein catabolic process|GO:0008150:biological_process|GO:0003674:molecular_function|GO:0005634:nucleus|GO:0004842:ubiquitin-protein transferase activity
PM01G06780	0	0	0	0	0.01	0.01	0.06	0	GO:0019005:SCF ubiquitin ligase complex|GO:0031146:SCF-dependent proteasomal ubiquitin-dependent protein catabolic process|GO:0004842:ubiquitin-protein transferase activity
PM01G06790	8.11	4.34	1.33	7.06	18.3	7.47	8.7	28.93	GO:0048513:animal organ development|GO:0045176:apical protein localization|GO:0010540:basipetal auxin transport|GO:0071944:cell periphery|GO:0048825:cotyledon development|GO:0009908:flower development|GO:0010229:inflorescence development|GO:0005770:late endosome|GO:0048827:phyllome development|GO:0005886:plasma membrane|GO:0009958:positive gravitropism|GO:0009911:positive regulation of flower dev…
PM01G06800	0.23	0.17	1.26	0.44	0.07	0.05	0	0.01
PM01G06810	4.1	2	1.05	0.81	0.43	0.34	0.14	0	GO:0006474:N-terminal protein amino acid acetylation|GO:0004596:peptide alpha-N-acetyltransferase activity|GO:0031248:protein acetyltransferase complex
PM01G06820	8.06	4.99	0.17	0.99	8.34	9.21	3.93	1.47	GO:0048046:apoplast|GO:0008150:biological_process|GO:0051301:cell division|GO:0009658:chloroplast organization|GO:0005737:cytoplasm|GO:0010342:endosperm cellularization|GO:0009960:endosperm development|GO:0005874:microtubule|GO:0008017:microtubule binding|GO:0000226:microtubule cytoskeleton organization|GO:0007067:mitotic nuclear division|GO:0003674:molecular_function|GO:0005880:nuclear microtubu…
PM01G06830	0.29	0.04	0.01	0.03	0.05	0.62	0.8	0.04	GO:0031463:Cul3-RING ubiquitin ligase complex|GO:0019005:SCF ubiquitin ligase complex|GO:0071472:cellular response to salt stress|GO:0042631:cellular response to water deprivation|GO:0005737:cytoplasm|GO:0005829:cytosol|GO:0042802:identical protein binding|GO:0031397:negative regulation of protein ubiquitination|GO:0005634:nucleus|GO:0043161:proteasome-mediated ubiquitin-dependent protein catabol…
PM01G06840	5.47	3.6	6.48	5.17	5.05	5.4	5.72	12.99
PM01G06850	0.66	0.37	0.73	0.73	0.69	0.94	1.27	5.47	GO:0008150:biological_process|GO:0072717:cellular response to actinomycin D|GO:0071222:cellular response to lipopolysaccharide|GO:0097237:cellular response to toxic substance|GO:0071356:cellular response to tumor necrosis factor|GO:0005737:cytoplasm|GO:0005829:cytosol|GO:0005576:extracellular region|GO:0005615:extracellular space|GO:0050660:flavin adenine dinucleotide binding|GO:0016971:flavin-li…
PM01G06860	37.09	19.96	49.2	53.07	35.65	29.07	95.4	9.25	GO:0008150:biological_process|GO:0005739:mitochondrion|GO:0003674:molecular_function
PM01G06870	3.18	2.3	0.54	2.2	2.75	1.26	1.09	0.32	GO:0008150:biological_process|GO:0016021:integral component of membrane|GO:0016020:membrane|GO:0003674:molecular_function|GO:0005886:plasma membrane
PM01G06880	27.42	17.66	23.86	9.8	1.91	7.99	2.02	0.09	GO:0009507:chloroplast|GO:0005737:cytoplasm|GO:0016020:membrane|GO:0005634:nucleus|GO:0009638:phototropism|GO:0005886:plasma membrane|GO:0009860:pollen tube growth|GO:0016567:protein ubiquitination|GO:0009416:response to light stimulus|GO:0004871:signal transducer activity|GO:0007165:signal transduction
PM01G06890	21.16	20.17	12.93	16.24	12.48	9.33	25.58	8	GO:0005737:cytoplasm|GO:0005634:nucleus|GO:0043161:proteasome-mediated ubiquitin-dependent protein catabolic process|GO:0000209:protein polyubiquitination|GO:0042787:protein ubiquitination involved in ubiquitin-dependent protein catabolic process|GO:0061630:ubiquitin protein ligase activity|GO:0008270:zinc ion binding
PM01G06900	11.8	32.34	13.33	15.61	11.58	11.34	23.86	4.33	GO:0005794:Golgi apparatus|GO:0048193:Golgi vesicle transport|GO:0005484:SNAP receptor activity|GO:0000149:SNARE binding|GO:0031201:SNARE complex|GO:0012505:endomembrane system|GO:0016021:integral component of membrane|GO:0006886:intracellular protein transport|GO:0005634:nucleus|GO:0048278:vesicle docking|GO:0006906:vesicle fusion
PM01G06910	6.49	20.37	8.13	9.49	6.34	6.78	6.38	1.59	GO:0005794:Golgi apparatus|GO:0048193:Golgi vesicle transport|GO:0005484:SNAP receptor activity|GO:0000149:SNARE binding|GO:0031201:SNARE complex|GO:0012505:endomembrane system|GO:0016021:integral component of membrane|GO:0006886:intracellular protein transport|GO:0005634:nucleus|GO:0048278:vesicle docking|GO:0006906:vesicle fusion
PM01G06920	38.9	10.2	31.14	37.26	45.92	35.36	50.7	98.51	GO:0005762:mitochondrial large ribosomal subunit|GO:0003735:structural constituent of ribosome
PM01G06930	20.85	32.64	0.45	2.4	1.07	1.34	6.78	0.47	GO:0009507:chloroplast|GO:0005737:cytoplasm|GO:0046872:metal ion binding|GO:0005739:mitochondrion|GO:1900056:negative regulation of leaf senescence|GO:0005634:nucleus|GO:0016791:phosphatase activity|GO:0005886:plasma membrane|GO:0005515:protein binding|GO:0006470:protein dephosphorylation|GO:0004722:protein serine/threonine phosphatase activity
PM01G06940	0.44	0.02	0	0.04	0	0	4.31	0	GO:0031672:A band|GO:0030018:Z disc|GO:0008150:biological_process|GO:0048738:cardiac muscle tissue development|GO:0030154:cell differentiation|GO:0005737:cytoplasm|GO:0005739:mitochondrion|GO:0003674:molecular_function|GO:0007275:multicellular organism development|GO:0048747:muscle fiber development|GO:0007517:muscle organ development|GO:0030239:myofibril assembly|GO:0005634:nucleus|GO:0048471:pe…
PM01G06950	6.46	4.6	8.94	9.72	11.25	12.51	5.8	21.72	GO:0071339:MLL1 complex|GO:0048188:Set1C/COMPASS complex|GO:0006974:cellular response to DNA damage stimulus|GO:0005834:heterotrimeric G-protein complex|GO:0051568:histone H3-K4 methylation|GO:0042800:histone methyltransferase activity (H3-K4 specific)|GO:0035064:methylated histone binding|GO:0005730:nucleolus|GO:0000166:nucleotide binding|GO:0005634:nucleus|GO:0043627:response to estrogen|GO:004…
PM01G06960	31.08	30.88	39.18	86.53	54.74	43.01	38.81	29.55	GO:0005794:Golgi apparatus|GO:0043091:L-arginine import|GO:0000165:MAPK cascade|GO:0045342:MHC class II biosynthetic process|GO:0002369:T cell cytokine production|GO:0002309:T cell proliferation involved in immune response|GO:0032147:activation of protein kinase activity|GO:0048002:antigen processing and presentation of peptide antigen|GO:0070574:cadmium ion transmembrane transport|GO:0015691:cad…
PM01G06970	199.64	92.35	65.03	108.5	185.96	114.67	267.09	376.65	GO:0005794:Golgi apparatus|GO:0005737:cytoplasm|GO:0005829:cytosol|GO:0022626:cytosolic ribosome|GO:0022627:cytosolic small ribosomal subunit|GO:0000028:ribosomal small subunit assembly|GO:0005840:ribosome|GO:0003735:structural constituent of ribosome|GO:0006412:translation|GO:0006414:translational elongation
PM01G06980	0.31	0.14	0.23	0.86	0.89	0.66	1.12	1.44	GO:0000966:RNA 5'-end processing|GO:0003723:RNA binding|GO:0004016:adenylate cyclase activity|GO:0008150:biological_process|GO:0009507:chloroplast|GO:0005829:cytosol|GO:0006397:mRNA processing|GO:0000398:mRNA splicing, via spliceosome|GO:0005739:mitochondrion|GO:0003674:molecular_function|GO:0009788:negative regulation of abscisic acid-activated signaling pathway|GO:0005634:nucleus|GO:0010029:reg…
PM01G06990	0.37	0	0	0.02	0	0	0.04	0	GO:0008150:biological_process|GO:0005575:cellular_component|GO:0005737:cytoplasm|GO:0005576:extracellular region|GO:0035556:intracellular signal transduction|GO:0003674:molecular_function|GO:0005634:nucleus|GO:0055114:oxidation-reduction process|GO:0047134:protein-disulfide reductase activity|GO:0006950:response to stress|GO:0008270:zinc ion binding
PM01G07000	0.53	0.07	0.04	0.14	0.2	0.15	0.17	0.21	GO:0042023:DNA endoreduplication|GO:0005794:Golgi apparatus|GO:0007265:Ras protein signal transduction|GO:0007049:cell cycle|GO:0051301:cell division|GO:0008283:cell proliferation|GO:0004693:cyclin-dependent protein serine/threonine kinase activity|GO:0016538:cyclin-dependent protein serine/threonine kinase regulator activity|GO:0005737:cytoplasm|GO:0001939:female pronucleus|GO:0016301:kinase act…
PM01G07010	8.25	6.84	9.02	9.84	9.33	9.45	14.08	4.23	GO:0009298:GDP-mannose biosynthetic process|GO:0005525:GTP binding|GO:0009058:biosynthetic process|GO:0005575:cellular_component|GO:0005737:cytoplasm|GO:0005829:cytosol|GO:0070062:extracellular exosome|GO:0004475:mannose-1-phosphate guanylyltransferase activity|GO:0003674:molecular_function|GO:0000166:nucleotide binding|GO:0016779:nucleotidyltransferase activity|GO:0005634:nucleus|GO:0005777:pero…
PM01G07020	20.75	8.45	2.9	7.98	20.42	4.65	22.7	0.97	GO:0005096:GTPase activator activity|GO:0005794:Golgi apparatus|GO:0008150:biological_process|GO:0032153:cell division site|GO:0009504:cell plate|GO:0009507:chloroplast|GO:0000911:cytokinesis by cell plate formation|GO:0005737:cytoplasm|GO:0005829:cytosol|GO:0005783:endoplasmic reticulum|GO:0048527:lateral root development|GO:0007067:mitotic nuclear division|GO:0003674:molecular_function|GO:00056…
PM01G07030	11.76	15.41	23.02	27.62	28.5	25.29	24.68	30.44	GO:0005685:U1 snRNP|GO:0071004:U2-type prespliceosome|GO:0000243:commitment complex|GO:0000395:mRNA 5'-splice site recognition|GO:0030627:pre-mRNA 5'-splice site binding
PM01G07040	10.56	2.42	0.27	0.7	13.4	4.36	1.95	0.22	GO:0008150:biological_process|GO:0005575:cellular_component|GO:0009507:chloroplast|GO:0005576:extracellular region|GO:0003674:molecular_function|GO:0005774:vacuolar membrane|GO:0005773:vacuole
PM01G07050	59.28	319.53	484.52	95.07	45.16	73.46	6.97	2.25	GO:0009738:abscisic acid-activated signaling pathway|GO:0005575:cellular_component|GO:0009507:chloroplast|GO:0009941:chloroplast envelope|GO:0009570:chloroplast stroma|GO:0003674:molecular_function|GO:0005886:plasma membrane|GO:0009617:response to bacterium|GO:0046686:response to cadmium ion|GO:0009409:response to cold|GO:0009735:response to cytokinin|GO:0009408:response to heat|GO:0009651:respon…
PM01G07060	24.22	34.92	43.2	25.04	6.98	10.96	0.17	0	GO:0008150:biological_process|GO:0009507:chloroplast|GO:0003674:molecular_function
PM01G07070	6.24	6.81	15.32	12.85	10.1	11.05	9.34	24.94
PM01G07080	4.62	8.1	12.08	11.33	11.33	11.57	9.24	18.6	GO:0008150:biological_process|GO:0005575:cellular_component|GO:0016021:integral component of membrane|GO:0003674:molecular_function|GO:0016779:nucleotidyltransferase activity|GO:0005634:nucleus
PM01G07090	2.8	11	9.97	10.49	8.35	9.78	8.84	8.5	GO:0008150:biological_process|GO:0005575:cellular_component|GO:0016021:integral component of membrane|GO:0003674:molecular_function|GO:0016779:nucleotidyltransferase activity|GO:0005634:nucleus
PM01G07100	2.35	2.76	3.27	4.03	5.64	5.35	3.48	8.45	GO:0008150:biological_process|GO:0005575:cellular_component|GO:0016021:integral component of membrane|GO:0003674:molecular_function|GO:0016779:nucleotidyltransferase activity|GO:0005634:nucleus
PM01G07110	7.97	6.64	1.06	0.71	0.85	0.76	0	0	GO:0008150:biological_process|GO:0003674:molecular_function
PM01G07120	2.75	2.32	1.17	1.73	2.94	3.34	2.97	0.9	GO:0005794:Golgi apparatus|GO:0005737:cytoplasm|GO:0016021:integral component of membrane|GO:0016567:protein ubiquitination|GO:0004842:ubiquitin-protein transferase activity|GO:0008270:zinc ion binding
PM01G07130	0.04	0.04	0	0	0.07	0.03	0	0.04
PM01G07140	0.1	0	0.01	0.03	0.23	0.01	0.03	0
PM01G07150	1.59	1.19	3.12	4.48	6.68	6.28	4.67	8.66	GO:0008150:biological_process|GO:0005516:calmodulin binding|GO:0005634:nucleus|GO:0005886:plasma membrane|GO:0005774:vacuolar membrane
PM01G07160	5.98	2.96	4.26	5.72	18.14	0.89	3.45	0.61	GO:0003677:DNA binding|GO:0008150:biological_process|GO:0005737:cytoplasm|GO:0005739:mitochondrion|GO:0005886:plasma membrane
PM01G07170	3.81	4.78	7.52	4.32	2.97	3.8	0.99	1.43	GO:0003677:DNA binding|GO:0000966:RNA 5'-end processing|GO:0003723:RNA binding|GO:0008150:biological_process|GO:0005575:cellular_component|GO:0009507:chloroplast|GO:0010019:chloroplast-nucleus signaling pathway|GO:0009793:embryo development ending in seed dormancy|GO:0031930:mitochondria-nucleus signaling pathway|GO:0005739:mitochondrion|GO:0003674:molecular_function
PM01G07180	4.7	2.32	3.08	3.77	6.42	7.12	6.55	37.03	GO:0060055:angiogenesis involved in wound healing|GO:0004566:beta-glucuronidase activity|GO:0005975:carbohydrate metabolic process|GO:0007155:cell adhesion|GO:0005618:cell wall|GO:0007160:cell-matrix adhesion|GO:0030198:extracellular matrix organization|GO:0005576:extracellular region|GO:0043395:heparan sulfate proteoglycan binding|GO:0030200:heparan sulfate proteoglycan catabolic process|GO:0030…
PM01G07190	24.53	30.34	2.29	7.37	21.15	13.63	12.49	3.46	GO:0005794:Golgi apparatus|GO:0000139:Golgi membrane|GO:0016051:carbohydrate biosynthetic process|GO:0007155:cell adhesion|GO:0071555:cell wall organization|GO:0052325:cell wall pectin biosynthetic process|GO:0005768:endosome|GO:0010417:glucuronoxylan biosynthetic process|GO:0010413:glucuronoxylan metabolic process|GO:0010289:homogalacturonan biosynthetic process|GO:0016021:integral component of …
PM01G07200	9.74	40.47	2.54	6.25	8.17	9.84	6.51	6.11	GO:0003979:UDP-glucose 6-dehydrogenase activity|GO:0006065:UDP-glucuronate biosynthetic process|GO:0005975:carbohydrate metabolic process|GO:0005829:cytosol|GO:0006024:glycosaminoglycan biosynthetic process|GO:0005634:nucleus
PM01G07210	0	0.01	0	0	0	2.11	0	0.03	GO:0009813:flavonoid biosynthetic process|GO:0052696:flavonoid glucuronidation|GO:0042802:identical protein binding|GO:0043231:intracellular membrane-bounded organelle|GO:0080043:quercetin 3-O-glucosyltransferase activity|GO:0080044:quercetin 7-O-glucosyltransferase activity
PM01G07220	0	0.11	1.93	1.4	0.04	0.3	0.21	0.58	GO:0043531:ADP binding|GO:0005524:ATP binding|GO:0006952:defense response|GO:0005576:extracellular region|GO:0005634:nucleus|GO:0005515:protein binding
PM01G07230	5.84	5.78	14.61	12.22	5.66	8.87	22.48	2.7	GO:0038128:ERBB2 signaling pathway|GO:0005176:ErbB-2 class receptor binding|GO:0009925:basal plasma membrane|GO:0045175:basal protein localization|GO:0005604:basement membrane|GO:0016323:basolateral plasma membrane|GO:0008150:biological_process|GO:0007155:cell adhesion|GO:0007049:cell cycle|GO:0016049:cell growth|GO:0030054:cell junction|GO:0071356:cellular response to tumor necrosis factor|GO:00…
PM01G07240	0.7	0.88	0.26	0.06	0.35	39.64	0	0.11	GO:0003677:DNA binding|GO:0009941:chloroplast envelope|GO:0009793:embryo development ending in seed dormancy|GO:0005634:nucleus|GO:0006355:regulation of transcription, DNA-templated|GO:0003700:transcription factor activity, sequence-specific DNA binding|GO:0006351:transcription, DNA-templated
PM01G07250	16.49	30.97	31.15	26.96	23.09	31.32	18.05	49.6	GO:0005524:ATP binding|GO:0003677:DNA binding|GO:0006259:DNA metabolic process|GO:0003916:DNA topoisomerase activity|GO:0009330:DNA topoisomerase complex (ATP-hydrolyzing)|GO:0003918:DNA topoisomerase type II (ATP-hydrolyzing) activity|GO:0006265:DNA topological change|GO:0006268:DNA unwinding involved in DNA replication|GO:0008094:DNA-dependent ATPase activity|GO:0006261:DNA-dependent DNA replic…
PM01G07260	6.05	4.78	7.07	9.63	8.69	7.06	7.95	3.79	GO:0005886:plasma membrane
PM01G07270	0.1	0	0	0.02	0	0	0	0
PM01G07280	2.17	0.26	0.01	0.24	1.96	0.63	1.12	0.01	GO:0032147:activation of protein kinase activity|GO:0005874:microtubule|GO:0005739:mitochondrion|GO:0003674:molecular_function|GO:0005634:nucleus|GO:0060236:regulation of mitotic spindle organization|GO:0005819:spindle
PM01G07290	53.33	51.6	34.08	44.06	77.45	79.85	80.19	50.09	GO:0009060:aerobic respiration|GO:0004222:metalloendopeptidase activity|GO:0006122:mitochondrial electron transport, ubiquinol to cytochrome c|GO:0005750:mitochondrial respiratory chain complex III|GO:0016485:protein processing|GO:0008270:zinc ion binding
PM01G07300	2.04	2.62	0.01	0.02	4.54	6.37	0.45	0.5	GO:0048046:apoplast|GO:0004565:beta-galactosidase activity|GO:0080083:beta-gentiobiose beta-glucosidase activity|GO:0008422:beta-glucosidase activity|GO:0005975:carbohydrate metabolic process|GO:0080079:cellobiose glucosidase activity|GO:0009507:chloroplast|GO:0005576:extracellular region|GO:0042973:glucan endo-1,3-beta-D-glucosidase activity|GO:1901657:glycosyl compound metabolic process|GO:0016…
PM01G07310	0.29	0.19	0	0	0.4	0.62	0	0.14	GO:0048046:apoplast|GO:0004565:beta-galactosidase activity|GO:0080083:beta-gentiobiose beta-glucosidase activity|GO:0008422:beta-glucosidase activity|GO:0005975:carbohydrate metabolic process|GO:0080079:cellobiose glucosidase activity|GO:0009507:chloroplast|GO:0005576:extracellular region|GO:0042973:glucan endo-1,3-beta-D-glucosidase activity|GO:1901657:glycosyl compound metabolic process|GO:0016…
PM01G07320	5.34	4.21	0.03	2.03	1.27	12.47	2	0.8	GO:0048046:apoplast|GO:0004565:beta-galactosidase activity|GO:0080083:beta-gentiobiose beta-glucosidase activity|GO:0008422:beta-glucosidase activity|GO:0005975:carbohydrate metabolic process|GO:0080079:cellobiose glucosidase activity|GO:0009507:chloroplast|GO:0005576:extracellular region|GO:0042973:glucan endo-1,3-beta-D-glucosidase activity|GO:1901657:glycosyl compound metabolic process|GO:0016…
PM01G07330	24.08	10.84	80.29	112.18	48.28	48.95	30.39	37.08	GO:0005794:Golgi apparatus|GO:0015450:P-P-bond-hydrolysis-driven protein transmembrane transporter activity|GO:0009507:chloroplast|GO:0005783:endoplasmic reticulum|GO:0005789:endoplasmic reticulum membrane|GO:0021986:habenula development|GO:0030176:integral component of endoplasmic reticulum membrane|GO:0016021:integral component of membrane|GO:0044351:macropinocytosis|GO:0016020:membrane|GO:0005…
PM01G07340	0	0	0	0	0	0	0	0
PM01G07350	4.66	11.02	16.71	19.64	22.32	19.83	15.38	12.5	GO:0008150:biological_process|GO:0005739:mitochondrion|GO:0003674:molecular_function|GO:0005634:nucleus|GO:0009506:plasmodesma
PM01G07360	2.06	5.6	10.86	14.64	11.74	11.67	10.44	25.42	GO:0005524:ATP binding|GO:0043140:ATP-dependent 3'-5' DNA helicase activity|GO:0006307:DNA dealkylation involved in DNA repair|GO:0032508:DNA duplex unwinding|GO:0006281:DNA repair|GO:0005794:Golgi apparatus|GO:0008150:biological_process|GO:0008283:cell proliferation|GO:0006974:cellular response to DNA damage stimulus|GO:0005575:cellular_component|GO:0005737:cytoplasm|GO:0004386:helicase activity…
PM01G07370	1	1.07	3.22	2.75	2.7	6.12	1.68	3.37
PM01G07380	1.95	2.13	4.19	6.33	4.06	4.02	6.71	5.53	GO:0008150:biological_process|GO:0016021:integral component of membrane|GO:0016020:membrane|GO:0003674:molecular_function
PM01G07390	1.94	0.54	1.58	3.44	3.8	3.37	2.76	10.09	GO:0016021:integral component of membrane|GO:1990616:magnesium ion export from mitochondrion|GO:0015095:magnesium ion transmembrane transporter activity|GO:0015693:magnesium ion transport|GO:0005743:mitochondrial inner membrane|GO:0006839:mitochondrial transport|GO:0003735:structural constituent of ribosome|GO:0006412:translation|GO:0055085:transmembrane transport|GO:0006810:transport
PM01G07400	0.31	0.17	0.13	0.3	0.07	0.15	0.14	0.37
PM01G07410	110.7	68.46	60.09	82.43	123.83	115.19	98.88	86.61	GO:0006754:ATP biosynthetic process|GO:0046034:ATP metabolic process|GO:0015986:ATP synthesis coupled proton transport|GO:0016887:ATPase activity|GO:0005794:Golgi apparatus|GO:0005618:cell wall|GO:0009507:chloroplast|GO:0005737:cytoplasm|GO:0070062:extracellular exosome|GO:0006811:ion transport|GO:0005811:lipid particle|GO:0016020:membrane|GO:0005740:mitochondrial envelope|GO:0005743:mitochondria…
PM01G07420	4.73	8.2	16.89	18.85	14.5	10.04	10.34	8.32	GO:0003723:RNA binding|GO:0008150:biological_process|GO:0005634:nucleus|GO:0005515:protein binding
PM01G07430	0.03	0.01	0	0	0.01	0.02	0.07	1.17	GO:0010018:far-red light signaling pathway|GO:0005634:nucleus|GO:0009506:plasmodesma|GO:0042753:positive regulation of circadian rhythm|GO:0045893:positive regulation of transcription, DNA-templated|GO:0005515:protein binding|GO:0010017:red or far-red light signaling pathway|GO:0006355:regulation of transcription, DNA-templated|GO:0010218:response to far red light|GO:0009639:response to red or fa…
PM01G07440	0	0	0	0.01	0	0	0	0	GO:0016929:SUMO-specific protease activity|GO:0006915:apoptotic process|GO:0005737:cytoplasm|GO:0004175:endopeptidase activity|GO:0005634:nucleus|GO:0043161:proteasome-mediated ubiquitin-dependent protein catabolic process|GO:0016926:protein desumoylation|GO:0042787:protein ubiquitination involved in ubiquitin-dependent protein catabolic process|GO:0061630:ubiquitin protein ligase activity
PM01G07450	0	0	0	0	0	0	0	0.02	GO:0016929:SUMO-specific protease activity|GO:0004175:endopeptidase activity|GO:0005634:nucleus|GO:0016926:protein desumoylation
PM01G07460	8.83	1.01	0.09	2.49	12.71	6.29	8.19	1.01	GO:0005524:ATP binding|GO:0003677:DNA binding|GO:0042769:DNA damage response, detection of DNA damage|GO:0006310:DNA recombination|GO:0006281:DNA repair|GO:0006260:DNA replication|GO:0005662:DNA replication factor A complex|GO:0006261:DNA-dependent DNA replication|GO:0000082:G1/S transition of mitotic cell cycle|GO:0016605:PML body|GO:0006284:base-excision repair|GO:0051026:chiasma assembly|GO:00…
PM01G07470	2.88	2.47	1.22	1.01	2.66	3.79	0.52	57.88	GO:0003723:RNA binding|GO:0009738:abscisic acid-activated signaling pathway|GO:0005622:intracellular|GO:0003674:molecular_function|GO:0009788:negative regulation of abscisic acid-activated signaling pathway|GO:0003676:nucleic acid binding|GO:0006913:nucleocytoplasmic transport|GO:0000166:nucleotide binding|GO:0005634:nucleus|GO:0009506:plasmodesma|GO:0005515:protein binding|GO:0010581:regulation …
PM01G07480	3.14	3.62	5.76	7.45	9.06	6.7	12.72	4.59	GO:0035250:UDP-galactosyltransferase activity|GO:0008194:UDP-glycosyltransferase activity|GO:0016036:cellular response to phosphate starvation|GO:0009507:chloroplast|GO:0009707:chloroplast outer membrane|GO:0046481:digalactosyldiacylglycerol synthase activity|GO:0019375:galactolipid biosynthetic process|GO:0046480:galactolipid galactosyltransferase activity|GO:0009247:glycolipid biosynthetic proc…
PM01G07490	5.18	7.41	15.28	14.5	16.14	16.07	10.73	10.86	GO:0003677:DNA binding|GO:0030154:cell differentiation|GO:0009908:flower development|GO:0046872:metal ion binding|GO:0032259:methylation|GO:0008168:methyltransferase activity|GO:0003676:nucleic acid binding|GO:0005634:nucleus|GO:0010220:positive regulation of vernalization response
PM01G07500	14.66	18.19	16.17	47.55	16.42	34.76	50.32	17.93	GO:1990570:GDP-mannose transmembrane transport|GO:0005458:GDP-mannose transmembrane transporter activity|GO:0015784:GDP-mannose transport|GO:0005794:Golgi apparatus|GO:0000139:Golgi membrane|GO:0005459:UDP-galactose transmembrane transporter activity|GO:0015785:UDP-galactose transport|GO:0005460:UDP-glucose transmembrane transporter activity|GO:0015786:UDP-glucose transport|GO:0008643:carbohydrat…
PM01G07510	0.65	0.27	0.15	0.61	0.47	20.21	0	0.19	GO:0003677:DNA binding|GO:0010158:abaxial cell fate specification|GO:0048440:carpel development|GO:0030154:cell differentiation|GO:0045165:cell fate commitment|GO:0010582:floral meristem determinacy|GO:0010154:fruit development|GO:0010450:inflorescence meristem growth|GO:0048366:leaf development|GO:0010022:meristem determinacy|GO:0009933:meristem structural organization|GO:0046872:metal ion bindi…
PM01G07520	0.3	0.02	0.03	2.18	1.18	308.35	0.09	17.16	GO:0003677:DNA binding|GO:0030154:cell differentiation|GO:0009908:flower development|GO:0005634:nucleus|GO:0048481:plant ovule development|GO:0005515:protein binding|GO:0046983:protein dimerization activity|GO:0006355:regulation of transcription, DNA-templated|GO:0010093:specification of floral organ identity|GO:0009888:tissue development|GO:0003700:transcription factor activity, sequence-specifi…
PM01G07530	14.1	17.34	27.93	27.04	27.95	27.87	29.58	18.28	GO:0005829:cytosol|GO:0006418:tRNA aminoacylation for protein translation
PM01G07540	7.39	10.28	0.47	7.34	14.84	15.33	3.05	0.88	GO:0071555:cell wall organization|GO:0010005:cortical microtubule, transverse to long axis|GO:0005737:cytoplasm|GO:0007010:cytoskeleton organization|GO:0005874:microtubule|GO:0008017:microtubule binding|GO:0005634:nucleus|GO:0009524:phragmoplast|GO:0009832:plant-type cell wall biogenesis|GO:0005886:plasma membrane|GO:0005819:spindle|GO:0010051:xylem and phloem pattern formation
PM01G07550	12.16	7.14	17.65	16.97	13.77	12.8	10.35	9.67	GO:0006520:cellular amino acid metabolic process|GO:0006535:cysteine biosynthetic process from serine|GO:0005737:cytoplasm|GO:0016021:integral component of membrane|GO:0016829:lyase activity|GO:0030170:pyridoxal phosphate binding
PM01G07560	7.23	9.67	7.45	4.75	2.99	3.95	1.51	1.04	GO:0003677:DNA binding|GO:0003723:RNA binding|GO:0004016:adenylate cyclase activity|GO:0008150:biological_process|GO:0009507:chloroplast|GO:0031425:chloroplast RNA processing|GO:0009658:chloroplast organization|GO:0009570:chloroplast stroma|GO:0010019:chloroplast-nucleus signaling pathway|GO:0031930:mitochondria-nucleus signaling pathway|GO:0005739:mitochondrion|GO:0009295:nucleoid|GO:0000166:nuc…
PM01G07570	0.41	0.46	2.22	2.93	1.97	1.55	2.4	2.49	GO:0008150:biological_process|GO:0005575:cellular_component|GO:0009507:chloroplast|GO:0009793:embryo development ending in seed dormancy|GO:0016020:membrane|GO:0032543:mitochondrial translation|GO:0005739:mitochondrion|GO:0003674:molecular_function
PM01G07580	0.08	0.03	0.1	0.13	0.14	2.21	0.05	0.17	GO:0009451:RNA modification|GO:0008150:biological_process|GO:0009507:chloroplast|GO:0031425:chloroplast RNA processing|GO:0006397:mRNA processing|GO:0080156:mitochondrial mRNA modification|GO:0005739:mitochondrion|GO:0003674:molecular_function|GO:0010182:sugar mediated signaling pathway|GO:0008270:zinc ion binding
PM01G07590	2.93	0.83	0	0.05	3.94	0.35	3.04	0	GO:0008150:biological_process|GO:0016021:integral component of membrane|GO:0003674:molecular_function|GO:0005634:nucleus
PM01G07600	7.22	10.1	14.59	17.64	25.47	23.51	21.33	15.34	GO:0005794:Golgi apparatus|GO:0006491:N-glycan processing|GO:0090599:alpha-glucosidase activity|GO:0030246:carbohydrate binding|GO:0005975:carbohydrate metabolic process|GO:0003824:catalytic activity|GO:0005575:cellular_component|GO:0030244:cellulose biosynthetic process|GO:0009507:chloroplast|GO:0042742:defense response to bacterium|GO:0005783:endoplasmic reticulum|GO:0005788:endoplasmic reticul…
PM01G07610	0.39	0.19	0.09	0.94	3.95	3.66	6.26	0.09	GO:0015137:citrate transmembrane transporter activity|GO:0006855:drug transmembrane transport|GO:0015238:drug transmembrane transporter activity|GO:0005886:plasma membrane
PM01G07620	0	0	0	0	0.02	0.21	0	0	GO:0009901:anther dehiscence|GO:0005975:carbohydrate metabolic process|GO:0005618:cell wall|GO:0009830:cell wall modification involved in abscission|GO:0071555:cell wall organization|GO:0005737:cytoplasm|GO:0005576:extracellular region|GO:0010227:floral organ abscission|GO:0010047:fruit dehiscence|GO:0016829:lyase activity|GO:0045490:pectin catabolic process|GO:0009505:plant-type cell wall|GO:000…
PM01G07630	1.02	0.43	0.09	0.26	0.57	0.29	0.25	0.01	GO:0008150:biological_process|GO:0005737:cytoplasm|GO:0003674:molecular_function
PM01G07640	23.37	3.13	78.69	22.84	8.75	7.51	0.73	0.13	GO:0008150:biological_process|GO:0016021:integral component of membrane|GO:0003674:molecular_function
PM01G07650	1.9	2.52	11.44	6.97	2.32	2.51	1.47	0.46	GO:0001708:cell fate specification|GO:0009793:embryo development ending in seed dormancy|GO:0090421:embryonic meristem initiation|GO:0009880:embryonic pattern specification|GO:0010078:maintenance of root meristem identity|GO:0010492:maintenance of shoot apical meristem identity|GO:0046872:metal ion binding|GO:0005634:nucleus|GO:0009536:plastid|GO:0080022:primary root development|GO:0005515:protei…
PM01G07660	9.15	25.91	39.64	31.72	5.13	4.62	16.51	16.96	GO:0015144:carbohydrate transmembrane transporter activity|GO:0005737:cytoplasm|GO:0046323:glucose import|GO:0005355:glucose transmembrane transporter activity|GO:0035428:hexose transmembrane transport|GO:0009679:hexose:proton symporter activity|GO:0005358:high-affinity hydrogen:glucose symporter activity|GO:0005887:integral component of plasma membrane|GO:0016020:membrane|GO:0015145:monosacchari…
PM01G07670	0.04	0.01	0.02	0.04	0.1	0.07	0.03	0.07
PM01G07680	0	0	0	0.08	0.34	0.66	0	0.2
PM01G07690	7.22	2.12	1.1	2.73	8.41	5.97	2.44	305.54	GO:0051084:'de novo' posttranslational protein folding|GO:0005524:ATP binding|GO:0016887:ATPase activity|GO:0030433:ER-associated ubiquitin-dependent protein catabolic process|GO:0005794:Golgi apparatus|GO:0006616:SRP-dependent cotranslational protein targeting to membrane, translocation|GO:0048046:apoplast|GO:0009986:cell surface|GO:0005618:cell wall|GO:0009507:chloroplast|GO:0005737:cytoplasm|G…
PM01G07700	1.44	0.68	0.01	0.15	2.22	0.29	1.28	0.41	GO:0005794:Golgi apparatus|GO:0008150:biological_process|GO:0035690:cellular response to drug|GO:0005575:cellular_component|GO:0005737:cytoplasm|GO:0006696:ergosterol biosynthetic process|GO:0005622:intracellular|GO:0005811:lipid particle|GO:0005739:mitochondrion|GO:0003674:molecular_function|GO:0043942:negative regulation of sexual sporulation resulting in formation of a cellular spore|GO:000563…
PM01G07710	16.07	9.63	18.6	11.69	6.74	8.83	5.24	10.21	GO:0071493:cellular response to UV-B|GO:0071486:cellular response to high light intensity|GO:0071484:cellular response to light intensity|GO:0071457:cellular response to ozone|GO:0071472:cellular response to salt stress|GO:0009507:chloroplast|GO:0005507:copper ion binding|GO:0005737:cytoplasm|GO:0005576:extracellular region|GO:0055114:oxidation-reduction process|GO:0005777:peroxisome|GO:0019430:r…
PM01G07720	30.71	27.59	45.83	52.51	63.48	102.37	27.26	10.36	GO:0005525:GTP binding|GO:0003924:GTPase activity|GO:0048046:apoplast|GO:0005618:cell wall|GO:0071258:cellular response to gravity|GO:0009507:chloroplast|GO:0009570:chloroplast stroma|GO:0005737:cytoplasm|GO:0005829:cytosol|GO:0016020:membrane|GO:0005874:microtubule|GO:0015630:microtubule cytoskeleton|GO:0000226:microtubule cytoskeleton organization|GO:0007018:microtubule-based movement|GO:000701…
PM01G07730	0.84	0.5	1.4	1.78	4.13	3.5	1.58	0.45	GO:0006046:N-acetylglucosamine catabolic process|GO:0035251:UDP-glucosyltransferase activity|GO:0016231:beta-N-acetylglucosaminidase activity|GO:0004563:beta-N-acetylhexosaminidase activity|GO:0005975:carbohydrate metabolic process|GO:0030287:cell wall-bounded periplasmic space|GO:0006032:chitin catabolic process|GO:0005576:extracellular region|GO:0015929:hexosaminidase activity|GO:0004553:hydrol…
PM01G07740	5.76	0.92	2.45	3.93	4.9	3.12	2.97	5.61	GO:0003677:DNA binding|GO:0006281:DNA repair|GO:0070530:K63-linked polyubiquitin binding|GO:0006556:S-adenosylmethionine biosynthetic process|GO:0009650:UV protection|GO:0006915:apoptotic process|GO:0006974:cellular response to DNA damage stimulus|GO:0005694:chromosome|GO:0070987:error-free translesion synthesis|GO:0042585:germinal vesicle|GO:0001940:male pronucleus|GO:0046872:metal ion binding|G…
PM01G07750	100.71	84.68	28.16	9.64	12.3	19.46	0.33	0.76	GO:0009507:chloroplast|GO:0009941:chloroplast envelope|GO:0009570:chloroplast stroma|GO:0000311:plastid large ribosomal subunit|GO:0009735:response to cytokinin|GO:0003735:structural constituent of ribosome|GO:0006412:translation
PM01G07760	47.43	39.26	11.69	21.25	17.7	20.45	4.38	2.14	GO:0042335:cuticle development|GO:0022626:cytosolic ribosome|GO:0005783:endoplasmic reticulum|GO:0005789:endoplasmic reticulum membrane|GO:0009913:epidermal cell differentiation|GO:0006633:fatty acid biosynthetic process|GO:0009922:fatty acid elongase activity|GO:0030497:fatty acid elongation|GO:0016021:integral component of membrane|GO:0008610:lipid biosynthetic process|GO:0016020:membrane|GO:00…
PM01G07770	9.4	11.46	1.81	7.55	3.5	6.24	4.49	4.13	GO:0035612:AP-2 adaptor complex binding|GO:0008898:S-adenosylmethionine-homocysteine S-methyltransferase activity|GO:0033528:S-methylmethionine cycle|GO:0033477:S-methylmethionine metabolic process|GO:0047150:betaine-homocysteine S-methyltransferase activity|GO:0008652:cellular amino acid biosynthetic process|GO:0006974:cellular response to DNA damage stimulus|GO:0005737:cytoplasm|GO:0005829:cyto…
PM01G07780	9.78	15.5	36.68	27.54	23.83	18.9	9.44	10.1	GO:0003677:DNA binding|GO:0000077:DNA damage checkpoint|GO:0008150:biological_process|GO:0003674:molecular_function|GO:0007275:multicellular organism development|GO:0005634:nucleus|GO:0045893:positive regulation of transcription, DNA-templated|GO:0040020:regulation of meiotic nuclear division|GO:2000652:regulation of secondary cell wall biogenesis|GO:0006355:regulation of transcription, DNA-templ…
PM01G07790	5.78	2.19	1.32	2.46	8.68	4.23	3.38	1.26	GO:0046658:anchored component of plasma membrane|GO:0004553:hydrolase activity, hydrolyzing O-glycosyl compounds|GO:0030247:polysaccharide binding
PM01G07800	2.04	7.87	5.24	7.57	6.61	4.95	2.28	4.17	GO:0008150:biological_process|GO:0005737:cytoplasm|GO:0043231:intracellular membrane-bounded organelle|GO:0005765:lysosomal membrane|GO:0019901:protein kinase binding|GO:0008104:protein localization
PM01G07810	30.51	19.56	0.2	3.17	30.85	11.72	20.2	0.01	GO:0005524:ATP binding|GO:0046658:anchored component of plasma membrane|GO:0005618:cell wall|GO:0005829:cytosol|GO:0005576:extracellular region|GO:0016021:integral component of membrane|GO:0016301:kinase activity|GO:0016020:membrane|GO:0016310:phosphorylation|GO:0009505:plant-type cell wall|GO:0009834:plant-type secondary cell wall biogenesis|GO:0005886:plasma membrane|GO:0009506:plasmodesma|GO:2…
PM01G07820	8.48	3.79	2.61	3.7	3.43	4.72	0.25	4.74	GO:0018685:alkane 1-monooxygenase activity|GO:0048653:anther development|GO:0070330:aromatase activity|GO:0071555:cell wall organization|GO:0009507:chloroplast|GO:0006952:defense response|GO:0002213:defense response to insect|GO:0005783:endoplasmic reticulum|GO:0005789:endoplasmic reticulum membrane|GO:0005576:extracellular region|GO:0006631:fatty acid metabolic process|GO:0010154:fruit developme…
PM01G07830	0.6	0.51	1.74	1.05	0.92	1.43	1.31	1.66	GO:0006405:RNA export from nucleus|GO:0009507:chloroplast|GO:0051028:mRNA transport|GO:0005643:nuclear pore|GO:0044611:nuclear pore inner ring|GO:0006913:nucleocytoplasmic transport|GO:0005487:nucleocytoplasmic transporter activity|GO:0005730:nucleolus|GO:0005634:nucleus|GO:0005886:plasma membrane|GO:0009506:plasmodesma|GO:0005515:protein binding|GO:0006606:protein import into nucleus|GO:0036228:…
PM01G07840	0.03	0.08	0	0.01	0.04	0.01	0.17	0.03	GO:0018685:alkane 1-monooxygenase activity|GO:0048653:anther development|GO:0070330:aromatase activity|GO:0071555:cell wall organization|GO:0005575:cellular_component|GO:0009507:chloroplast|GO:0006952:defense response|GO:0002213:defense response to insect|GO:0005783:endoplasmic reticulum|GO:0005789:endoplasmic reticulum membrane|GO:0005576:extracellular region|GO:0006631:fatty acid metabolic proc…
PM01G07850	102.65	77.36	16.84	10.67	41.28	27.83	303.41	0.59	GO:0005524:ATP binding|GO:0007568:aging|GO:0019676:ammonia assimilation cycle|GO:0048046:apoplast|GO:0003824:catalytic activity|GO:0005618:cell wall|GO:0006995:cellular response to nitrogen starvation|GO:0009507:chloroplast|GO:0009941:chloroplast envelope|GO:0009570:chloroplast stroma|GO:0009535:chloroplast thylakoid membrane|GO:0005507:copper ion binding|GO:0005737:cytoplasm|GO:0005829:cytosol|G…
PM01G07860	9.75	14.64	17.54	20.29	16.53	19.98	15.33	18.61	GO:0000139:Golgi membrane|GO:0070772:PAS complex|GO:0005737:cytoplasm|GO:0005829:cytosol|GO:0031901:early endosome membrane|GO:0005783:endoplasmic reticulum|GO:0005768:endosome|GO:0010008:endosome membrane|GO:0000329:fungal-type vacuole membrane|GO:0031902:late endosome membrane|GO:0046331:lateral inhibition|GO:0044351:macropinocytosis|GO:0016020:membrane|GO:0003674:molecular_function|GO:0006661:…
PM01G07870	2.75	6.2	11.91	15.26	15.31	12.96	11.64	27.65	GO:0006405:RNA export from nucleus|GO:0009507:chloroplast|GO:0051028:mRNA transport|GO:0005643:nuclear pore|GO:0044611:nuclear pore inner ring|GO:0006913:nucleocytoplasmic transport|GO:0005487:nucleocytoplasmic transporter activity|GO:0005730:nucleolus|GO:0005634:nucleus|GO:0005886:plasma membrane|GO:0009506:plasmodesma|GO:0005515:protein binding|GO:0006606:protein import into nucleus|GO:0036228:…
PM01G07880	1.17	0.81	1.55	2.13	0.88	0.81	3.18	1.77	GO:0103117:UDP-3-O-acyl-N-acetylglucosamine deacetylase activity|GO:0009507:chloroplast|GO:0005737:cytoplasm|GO:0009245:lipid A biosynthetic process|GO:2001289:lipid X metabolic process|GO:0046872:metal ion binding|GO:0005739:mitochondrion
PM01G07890	25.79	45.26	46.92	49.15	27.56	25.72	51.83	17.88	GO:0003677:DNA binding|GO:0071368:cellular response to cytokinin stimulus|GO:0009736:cytokinin-activated signaling pathway|GO:0009873:ethylene-activated signaling pathway|GO:0042802:identical protein binding|GO:0010150:leaf senescence|GO:0005634:nucleus|GO:0000156:phosphorelay response regulator activity|GO:0000160:phosphorelay signal transduction system|GO:0048576:positive regulation of short-da…
PM01G07900	33.47	37.5	17.23	41.91	67.13	22.08	54.25	3.99	GO:0015144:carbohydrate transmembrane transporter activity|GO:0009267:cellular response to starvation|GO:0009507:chloroplast|GO:0007619:courtship behavior|GO:0009567:double fertilization forming a zygote and endosperm|GO:0006897:endocytosis|GO:0008333:endosome to lysosome transport|GO:0010001:glial cell differentiation|GO:0008347:glial cell migration|GO:0016021:integral component of membrane|GO:0…
PM01G07910	0.54	0.04	0	0.03	0	0.03	1.63	0	GO:0015144:carbohydrate transmembrane transporter activity|GO:0009567:double fertilization forming a zygote and endosperm|GO:0016021:integral component of membrane|GO:0016020:membrane|GO:0005739:mitochondrion|GO:0005351:sugar:proton symporter activity|GO:0055085:transmembrane transport
PM01G07920	0.73	0.11	0	0.03	0	0.08	3.5	0	GO:0015144:carbohydrate transmembrane transporter activity|GO:0009507:chloroplast|GO:0009567:double fertilization forming a zygote and endosperm|GO:0016021:integral component of membrane|GO:0016020:membrane|GO:0005739:mitochondrion|GO:0015887:pantothenate transmembrane transport|GO:0015233:pantothenate transmembrane transporter activity|GO:0005886:plasma membrane|GO:0005351:sugar:proton symporter…
PM01G07930	5.41	3.17	4.87	28.85	36.02	9.02	14.49	1.68	GO:0003825:alpha,alpha-trehalose-phosphate synthase (UDP-forming) activity|GO:0005975:carbohydrate metabolic process|GO:0003824:catalytic activity|GO:0051301:cell division|GO:0005618:cell wall|GO:0005575:cellular_component|GO:0005737:cytoplasm|GO:0005829:cytosol|GO:0009793:embryo development ending in seed dormancy|GO:0005576:extracellular region|GO:0005739:mitochondrion|GO:0005634:nucleus|GO:000…
PM01G07940	5.04	8.82	21.85	15.5	10.79	12.17	13.62	8.49	GO:0003677:DNA binding|GO:0034605:cellular response to heat|GO:0071456:cellular response to hypoxia|GO:0034620:cellular response to unfolded protein|GO:0009507:chloroplast|GO:0005737:cytoplasm|GO:0010286:heat acclimation|GO:0042802:identical protein binding|GO:0016021:integral component of membrane|GO:0005634:nucleus|GO:0045893:positive regulation of transcription, DNA-templated|GO:0005515:protei…
PM01G07950	34.09	26.13	8.42	8.6	5.78	1.69	18.98	0.07	GO:0005737:cytoplasm|GO:0004702:receptor signaling protein serine/threonine kinase activity
PM01G07960	2.46	2.23	2.9	3.52	3.75	3.69	2.17	2.57	GO:0000966:RNA 5'-end processing|GO:0003723:RNA binding|GO:0004016:adenylate cyclase activity|GO:0008150:biological_process|GO:0009507:chloroplast|GO:0009793:embryo development ending in seed dormancy|GO:0006397:mRNA processing|GO:0016020:membrane|GO:0080156:mitochondrial mRNA modification|GO:0005739:mitochondrion|GO:0003674:molecular_function|GO:0009737:response to abscisic acid
PM01G07970	3.72	4.24	12.21	19.22	18.32	15.04	11.11	37.34	GO:0006405:RNA export from nucleus|GO:0009507:chloroplast|GO:0006325:chromatin organization|GO:0000777:condensed chromosome kinetochore|GO:0051028:mRNA transport|GO:0031081:nuclear pore distribution|GO:0031080:nuclear pore outer ring|GO:0005487:nucleocytoplasmic transporter activity|GO:0005634:nucleus|GO:0005515:protein binding|GO:0006606:protein import into nucleus|GO:0006355:regulation of trans…
PM01G07980	9.26	8.96	12.67	17.84	24.62	17.02	9.6	8.18	GO:0005794:Golgi apparatus|GO:0017119:Golgi transport complex|GO:0005829:cytosol|GO:0006891:intra-Golgi vesicle-mediated transport|GO:0003674:molecular_function
PM01G07990	2.45	2.64	1.82	0.9	0.32	0.5	1.59	0.7	GO:0007166:cell surface receptor signaling pathway|GO:0005886:plasma membrane|GO:0004674:protein serine/threonine kinase activity
PM01G08000	0.02	0	0.01	0.1	0.29	0.23	0.06	1.42	GO:0043140:ATP-dependent 3'-5' DNA helicase activity|GO:0003677:DNA binding|GO:0032508:DNA duplex unwinding|GO:0006310:DNA recombination|GO:0006260:DNA replication|GO:0019005:SCF ubiquitin ligase complex|GO:0031146:SCF-dependent proteasomal ubiquitin-dependent protein catabolic process|GO:0006284:base-excision repair|GO:0005694:chromosome|GO:0005737:cytoplasm|GO:0006302:double-strand break repair…
PM01G08010	38.56	98.96	4.4	45.57	37.77	83.17	59.89	11.81	GO:0009978:allene oxide synthase activity|GO:0009507:chloroplast|GO:0009941:chloroplast envelope|GO:0009534:chloroplast thylakoid|GO:0009535:chloroplast thylakoid membrane|GO:0006952:defense response|GO:0050832:defense response to fungus|GO:0019373:epoxygenase P450 pathway|GO:0020037:heme binding|GO:0016836:hydro-lyase activity|GO:0047987:hydroperoxide dehydratase activity|GO:0005506:iron ion bin…
PM01G08020	12.13	2.38	0.45	0.64	0.21	2.13	6.95	2.29	GO:0004096:catalase activity|GO:0005618:cell wall|GO:0098869:cellular oxidant detoxification|GO:0005737:cytoplasm|GO:0005829:cytosol|GO:0006631:fatty acid metabolic process|GO:0019395:fatty acid oxidation|GO:0047888:fatty acid peroxidase activity|GO:0020037:heme binding|GO:0005506:iron ion binding|GO:0016020:membrane|GO:0046872:metal ion binding|GO:0032966:negative regulation of collagen biosynth…
PM01G08030	5.72	2.61	0.11	0.54	6.25	4.02	2.16	1.08	GO:0008150:biological_process|GO:0005575:cellular_component|GO:0009507:chloroplast|GO:0005739:mitochondrion|GO:0003674:molecular_function|GO:0005634:nucleus|GO:0006355:regulation of transcription, DNA-templated|GO:0003700:transcription factor activity, sequence-specific DNA binding|GO:0005773:vacuole
PM01G08040	4.92	5.65	9.01	8.61	9.79	10.07	11.17	10.74	GO:0005737:cytoplasm|GO:0016874:ligase activity|GO:0032436:positive regulation of proteasomal ubiquitin-dependent protein catabolic process|GO:0000209:protein polyubiquitination|GO:0042787:protein ubiquitination involved in ubiquitin-dependent protein catabolic process|GO:0031624:ubiquitin conjugating enzyme binding|GO:0000151:ubiquitin ligase complex|GO:0061630:ubiquitin protein ligase activity|…
PM01G08050	0.22	0.04	0	0.01	0.07	4.88	3.91	0.13	GO:0008408:3'-5' exonuclease activity|GO:0048653:anther development|GO:0001709:cell fate determination|GO:0005737:cytoplasm|GO:0005576:extracellular region|GO:0005739:mitochondrion|GO:0003674:molecular_function|GO:0005634:nucleus|GO:0005515:protein binding|GO:0009408:response to heat
PM01G08060	2.04	0.91	0.3	0.99	4.97	0.21	2.11	0.09	GO:0005262:calcium channel activity|GO:0070588:calcium ion transmembrane transport|GO:0009507:chloroplast|GO:0016021:integral component of membrane|GO:0005743:mitochondrial inner membrane|GO:0015292:uniporter activity
PM01G08070	3.83	4.84	4.99	8.09	6.66	19.27	20.2	16.04	GO:0016021:integral component of membrane|GO:0004872:receptor activity|GO:0009725:response to hormone|GO:0009744:response to sucrose
PM01G08080	2.33	1.77	0.01	0.19	0.9	3.04	1.32	0.66	GO:0008374:O-acyltransferase activity|GO:0047499:calcium-independent phospholipase A2 activity|GO:0006672:ceramide metabolic process|GO:0070062:extracellular exosome|GO:0005576:extracellular region|GO:0005615:extracellular space|GO:0009062:fatty acid catabolic process|GO:0006631:fatty acid metabolic process|GO:0006650:glycerophospholipid metabolic process|GO:0016021:integral component of membrane…
PM01G08090	11.81	8.29	4.12	4.61	10.56	9.24	4.4	0.35	GO:0071472:cellular response to salt stress|GO:0005737:cytoplasm|GO:0005829:cytosol|GO:0006952:defense response|GO:0016874:ligase activity|GO:1901001:negative regulation of response to salt stress|GO:0005634:nucleus|GO:0051865:protein autoubiquitination|GO:0016567:protein ubiquitination|GO:0002679:respiratory burst involved in defense response|GO:0010200:response to chitin|GO:0009414:response to …
PM01G08100	0.05	0.27	0.62	0.18	0.06	0.48	0	0.46	GO:0005737:cytoplasm|GO:0006749:glutathione metabolic process|GO:0004364:glutathione transferase activity
PM01G08110	6.8	9.29	7.62	5.01	4.4	4.81	2.77	5.6	GO:0005525:GTP binding|GO:0000917:barrier septum assembly|GO:0008150:biological_process|GO:0009507:chloroplast|GO:0005737:cytoplasm|GO:0009793:embryo development ending in seed dormancy|GO:0016787:hydrolase activity|GO:0046872:metal ion binding|GO:0005515:protein binding
PM01G08120	12.81	11.95	3.28	6.14	2.12	4.36	5.65	14.44	GO:0030154:cell differentiation|GO:0008283:cell proliferation|GO:0031012:extracellular matrix|GO:0005576:extracellular region|GO:0008083:growth factor activity|GO:0009887:organ morphogenesis
PM01G08130	0.88	0	0	0.63	0.96	0.24	0.02	0.2	GO:0003677:DNA binding|GO:0000981:RNA polymerase II transcription factor activity, sequence-specific DNA binding|GO:0060774:auxin mediated signaling pathway involved in phyllotactic patterning|GO:0009734:auxin-activated signaling pathway|GO:0030154:cell differentiation|GO:0009873:ethylene-activated signaling pathway|GO:0009908:flower development|GO:0007276:gamete generation|GO:0060772:leaf phyllo…
PM01G08140	3.07	1.8	4.35	5.06	5.02	3.92	3.62	5.33	GO:0003677:DNA binding|GO:0009908:flower development|GO:0005634:nucleus|GO:0009911:positive regulation of flower development|GO:0005515:protein binding|GO:0046983:protein dimerization activity|GO:0040008:regulation of growth|GO:0006355:regulation of transcription, DNA-templated|GO:0009637:response to blue light|GO:0003700:transcription factor activity, sequence-specific DNA binding|GO:0006351:tra…
PM01G08150	124.77	226.39	25.33	21.78	43.69	97.66	57.05	21.41	GO:0071949:FAD binding|GO:0006725:cellular aromatic compound metabolic process|GO:0005575:cellular_component|GO:0006695:cholesterol biosynthetic process|GO:0005789:endoplasmic reticulum membrane|GO:0005576:extracellular region|GO:0050660:flavin adenine dinucleotide binding|GO:0016021:integral component of membrane|GO:0031966:mitochondrial membrane|GO:0004497:monooxygenase activity|GO:0055114:oxid…
PM01G08160	5.94	3.91	3.08	1.06	0.36	9.07	1.63	9.92	GO:0052656:L-isoleucine transaminase activity|GO:0052654:L-leucine transaminase activity|GO:0071267:L-methionine salvage|GO:0052655:L-valine transaminase activity|GO:0009082:branched-chain amino acid biosynthetic process|GO:0009081:branched-chain amino acid metabolic process|GO:0004084:branched-chain-amino-acid transaminase activity|GO:0003824:catalytic activity|GO:0009507:chloroplast|GO:0009570:…
PM01G08170	17	9.77	4.36	3.89	11.79	3.17	24.68	0.35	GO:0003677:DNA binding|GO:0009734:auxin-activated signaling pathway|GO:0008283:cell proliferation|GO:0003006:developmental process involved in reproduction|GO:0010582:floral meristem determinacy|GO:0080127:fruit septum development|GO:0048467:gynoecium development|GO:0048507:meristem development|GO:0045892:negative regulation of transcription, DNA-templated|GO:0005634:nucleus|GO:0009506:plasmodesm…
PM01G08180	7.72	5.88	8.01	8.54	9.61	5	6.06	11.31	GO:0005524:ATP binding|GO:0016324:apical plasma membrane|GO:0007596:blood coagulation|GO:0003824:catalytic activity|GO:0005737:cytoplasm|GO:0005829:cytosol|GO:0016311:dephosphorylation|GO:0005576:extracellular region|GO:0043647:inositol phosphate metabolic process|GO:0052746:inositol phosphorylation|GO:0047325:inositol tetrakisphosphate 1-kinase activity|GO:0032957:inositol trisphosphate metaboli…
PM01G08190	3.71	3.33	1.16	1.17	1.02	1.65	9.93	5.6	GO:0003950:NAD+ ADP-ribosyltransferase activity|GO:0005737:cytoplasm|GO:0009816:defense response to bacterium, incompatible interaction|GO:0009793:embryo development ending in seed dormancy|GO:0009873:ethylene-activated signaling pathway|GO:0009867:jasmonic acid mediated signaling pathway|GO:0010102:lateral root morphogenesis|GO:0005739:mitochondrion|GO:0007275:multicellular organism development|…
PM01G08200	0	0.06	0	0	0	0	0	0	GO:0005576:extracellular region|GO:0016021:integral component of membrane|GO:0016020:membrane|GO:0046872:metal ion binding|GO:0055114:oxidation-reduction process
PM01G08210	2.62	3.38	8.04	7.18	6.71	4.38	6.8	5.11	GO:0052689:carboxylic ester hydrolase activity|GO:0005737:cytoplasm|GO:0008474:palmitoyl-(protein) hydrolase activity|GO:0002084:protein depalmitoylation
PM01G08220	11.43	3.21	10.08	5.43	4.75	4.5	2.73	10.38	GO:0008150:biological_process|GO:0005575:cellular_component|GO:0009507:chloroplast|GO:0005737:cytoplasm|GO:0005829:cytosol|GO:0003674:molecular_function|GO:0047429:nucleoside-triphosphate diphosphatase activity|GO:0005634:nucleus
PM01G08230	4.14	3.21	7.41	5.43	5.4	0.94	1.92	0.04	GO:0017119:Golgi transport complex|GO:0006855:drug transmembrane transport|GO:0015238:drug transmembrane transporter activity
PM01G08240	0.38	0.28	0.17	0.18	0.22	0.06	0.22	1.85	GO:0003677:DNA binding|GO:0009738:abscisic acid-activated signaling pathway|GO:0009813:flavonoid biosynthetic process|GO:0005634:nucleus|GO:0005515:protein binding|GO:0046983:protein dimerization activity|GO:0009962:regulation of flavonoid biosynthetic process|GO:2000029:regulation of proanthocyanidin biosynthetic process|GO:0006355:regulation of transcription, DNA-templated|GO:0009737:response t…
PM01G08250	0.2	0.26	1.97	0.7	0.42	0.56	0.11	0.62
PM01G08260	0	0	0	0	0	0	0.09	0	GO:0019784:NEDD8-specific protease activity|GO:0016929:SUMO-specific protease activity|GO:0008234:cysteine-type peptidase activity|GO:0004175:endopeptidase activity|GO:0005634:nucleus|GO:0016926:protein desumoylation|GO:0006508:proteolysis
PM01G08270	3.62	1.88	1.18	1.01	10.4	6.05	3.35	0.77	GO:0005524:ATP binding|GO:0048653:anther development|GO:0030154:cell differentiation|GO:0051301:cell division|GO:0010227:floral organ abscission|GO:0048437:floral organ development|GO:0048229:gametophyte development|GO:0016021:integral component of membrane|GO:0016301:kinase activity|GO:0010102:lateral root morphogenesis|GO:0016020:membrane|GO:0010480:microsporocyte differentiation|GO:0007275:mul…
PM01G08280	2.81	1.08	1.58	1.47	2.44	2.86	1.41	3.53	GO:0008150:biological_process|GO:0003674:molecular_function|GO:0005634:nucleus
PM01G08290	7.52	4.8	16.8	12.17	9.28	9.2	6.84	3.58	GO:0030123:AP-3 adaptor complex|GO:0005794:Golgi apparatus|GO:0008089:anterograde axonal transport|GO:0048490:anterograde synaptic vesicle transport|GO:0006915:apoptotic process|GO:1904115:axon cytoplasm|GO:0010171:body morphogenesis|GO:0005623:cell|GO:0030125:clathrin vesicle coat|GO:0031410:cytoplasmic vesicle|GO:0030659:cytoplasmic vesicle membrane|GO:0005829:cytosol|GO:0009792:embryo developm…
PM01G08300	56.3	18.22	67.23	24.44	5.46	11.34	0.07	7.5	GO:0005829:cytosol|GO:0030267:glyoxylate reductase (NADP) activity|GO:0016618:hydroxypyruvate reductase activity
PM01G08310	2.47	0.19	0.07	0.15	1.21	1.38	0.55	0.07
PM01G08320	1.52	0.46	0.03	0.14	1.49	1.02	0.51	0.07	GO:0005524:ATP binding|GO:0009507:chloroplast|GO:0007623:circadian rhythm|GO:0016021:integral component of membrane|GO:0016301:kinase activity|GO:0005634:nucleus|GO:0016310:phosphorylation|GO:0005886:plasma membrane|GO:0009506:plasmodesma|GO:0046777:protein autophosphorylation|GO:0006468:protein phosphorylation|GO:0004674:protein serine/threonine kinase activity
PM01G08330	96.31	90.77	153.73	180.22	95.71	98.32	91.51	28.6
PM01G08340	2.89	2.71	6.18	11.72	3.92	5.67	3.16	0.09	GO:0016132:brassinosteroid biosynthetic process|GO:0010268:brassinosteroid homeostasis|GO:0005783:endoplasmic reticulum|GO:0020037:heme binding|GO:0016021:integral component of membrane|GO:0005506:iron ion binding|GO:0009867:jasmonic acid mediated signaling pathway|GO:0048366:leaf development|GO:0010358:leaf shaping|GO:0004497:monooxygenase activity|GO:0007275:multicellular organism development|G…
PM01G08350	0	0.06	0.48	0.23	0.22	0.08	0.09	0	GO:0005886:plasma membrane|GO:0071577:zinc II ion transmembrane transport|GO:0005385:zinc ion transmembrane transporter activity
PM01G08360	3.46	1.38	3.8	3.38	2.36	2.15	4.9	3.6
PM01G08370	8.35	7.78	3.8	4.02	6.31	4.59	4.34	1.09	GO:0046658:anchored component of plasma membrane|GO:0004553:hydrolase activity, hydrolyzing O-glycosyl compounds|GO:0030247:polysaccharide binding
PM01G08380	1.77	2.93	4.98	5.07	4.64	4.6	3.15	3.22	GO:0008409:5'-3' exonuclease activity|GO:0003677:DNA binding|GO:0006261:DNA-dependent DNA replication|GO:0003887:DNA-directed DNA polymerase activity|GO:0003824:catalytic activity|GO:0005737:cytoplasm|GO:0004527:exonuclease activity|GO:0005634:nucleus
PM01G08390	0.63	0.95	0.47	1.61	4.69	2.77	1.24	1.46	GO:0030126:COPI vesicle coat|GO:0030663:COPI-coated vesicle membrane|GO:0006888:ER to Golgi vesicle-mediated transport|GO:0005794:Golgi apparatus|GO:0000139:Golgi membrane|GO:0009507:chloroplast|GO:0030276:clathrin binding|GO:0005737:cytoplasm|GO:0031410:cytoplasmic vesicle|GO:0005829:cytosol|GO:0005789:endoplasmic reticulum membrane|GO:0006891:intra-Golgi vesicle-mediated transport|GO:0006886:in…
PM01G08400	0	0	0.17	0.07	0.01	7.39	0	0.03	GO:0005524:ATP binding|GO:0009738:abscisic acid-activated signaling pathway|GO:0019722:calcium-mediated signaling|GO:0032502:developmental process|GO:0016021:integral component of membrane|GO:0005887:integral component of plasma membrane|GO:0016301:kinase activity|GO:0016020:membrane|GO:0016310:phosphorylation|GO:0005886:plasma membrane|GO:0046777:protein autophosphorylation|GO:0004672:protein ki…
PM01G08410	3.88	4.36	7.19	5.26	2.76	2.58	2.77	1.43	GO:0008150:biological_process|GO:0009507:chloroplast|GO:0009570:chloroplast stroma|GO:0003674:molecular_function|GO:0009505:plant-type cell wall
PM01G08420	0	0.03	0.14	0.46	0.36	0.14	0	0.06	GO:0052689:carboxylic ester hydrolase activity|GO:0005737:cytoplasm|GO:0008474:palmitoyl-(protein) hydrolase activity|GO:0002084:protein depalmitoylation
PM01G08430	6.4	13.87	34.8	29.87	20.48	23.02	10.26	33.29	GO:0046539:histamine N-methyltransferase activity|GO:0032259:methylation
PM01G08440	17.74	22.7	29.54	21.62	6.58	17.34	20.58	14.75	GO:0016020:membrane|GO:0061088:regulation of sequestering of zinc ion|GO:0010043:response to zinc ion|GO:0005385:zinc ion transmembrane transporter activity
PM01G08450	1.21	0.33	1.28	1.79	0.46	0.69	0.92	0.46
PM01G08460	34.63	9.56	6.97	12.11	26.19	32.77	30.98	44.9
PM01G08470	2.19	2.13	3.81	2.74	3.88	3.62	4.87	2.02	GO:0007049:cell cycle|GO:0005634:nucleus|GO:0017053:transcriptional repressor complex
PM01G08480	3.65	6.51	0	0.51	13.22	10	0.07	0.02	GO:0005794:Golgi apparatus|GO:0048046:apoplast|GO:0005618:cell wall|GO:0005829:cytosol|GO:0006952:defense response|GO:0042742:defense response to bacterium|GO:0050832:defense response to fungus|GO:0002215:defense response to nematode|GO:0005576:extracellular region|GO:0009908:flower development|GO:0020037:heme binding|GO:0042744:hydrogen peroxide catabolic process|GO:0016020:membrane|GO:0046872:m…
PM01G08490	2.87	0.08	0	0.03	0.15	0.76	85.88	0	GO:0005794:Golgi apparatus|GO:0048046:apoplast|GO:0005618:cell wall|GO:0005737:cytoplasm|GO:0005829:cytosol|GO:0002215:defense response to nematode|GO:0005576:extracellular region|GO:0009908:flower development|GO:0020037:heme binding|GO:0042744:hydrogen peroxide catabolic process|GO:0009809:lignin biosynthetic process|GO:0046872:metal ion binding|GO:0005634:nucleus|GO:0055114:oxidation-reduction …
PM01G08500	13.11	8.86	10.82	12.8	15.88	16.28	21.33	13.66	GO:0008150:biological_process|GO:0030054:cell junction|GO:0005575:cellular_component|GO:0003674:molecular_function|GO:0005654:nucleoplasm|GO:0005634:nucleus
PM01G08510	0.48	0.15	0.33	0.28	0.66	0.42	0.78	0.59	GO:0008150:biological_process|GO:0005575:cellular_component|GO:0009507:chloroplast|GO:0031425:chloroplast RNA processing|GO:0009793:embryo development ending in seed dormancy|GO:0006397:mRNA processing|GO:0005739:mitochondrion|GO:0003674:molecular_function|GO:0008270:zinc ion binding
PM01G08520	5.24	5.36	7.64	11.08	8.68	6.69	7.63	1.82	GO:0005794:Golgi apparatus|GO:0042742:defense response to bacterium|GO:0042938:dipeptide transport|GO:0042936:dipeptide transporter activity|GO:0015334:high-affinity oligopeptide transporter activity|GO:0042538:hyperosmotic salinity response|GO:0016021:integral component of membrane|GO:0010150:leaf senescence|GO:0016020:membrane|GO:0042128:nitrate assimilation|GO:0015112:nitrate transmembrane tra…
PM01G08530	0.41	0.25	0	0.03	0.34	0.86	1.63	0	GO:0005794:Golgi apparatus|GO:0042938:dipeptide transport|GO:0042936:dipeptide transporter activity|GO:0015334:high-affinity oligopeptide transporter activity|GO:0016021:integral component of membrane|GO:0010150:leaf senescence|GO:0016020:membrane|GO:0042128:nitrate assimilation|GO:0015112:nitrate transmembrane transporter activity|GO:0015706:nitrate transport|GO:0006807:nitrogen compound metabol…
PM01G08540	4.42	5.64	7.73	5.07	5.07	7.55	13.8	12	GO:0005794:Golgi apparatus|GO:0042742:defense response to bacterium|GO:0042938:dipeptide transport|GO:0042936:dipeptide transporter activity|GO:0015334:high-affinity oligopeptide transporter activity|GO:0042538:hyperosmotic salinity response|GO:0016021:integral component of membrane|GO:0010150:leaf senescence|GO:0016020:membrane|GO:0042128:nitrate assimilation|GO:0015112:nitrate transmembrane tra…
PM01G08550	3.1	4.56	5.09	8.56	10.66	9.72	5.81	3.85	GO:0005794:Golgi apparatus|GO:0042938:dipeptide transport|GO:0042936:dipeptide transporter activity|GO:0015334:high-affinity oligopeptide transporter activity|GO:0016021:integral component of membrane|GO:0016020:membrane|GO:0015112:nitrate transmembrane transporter activity|GO:0006807:nitrogen compound metabolic process|GO:0006857:oligopeptide transport|GO:0015833:peptide transport|GO:0015197:pep…
PM01G08560	3.79	5.23	0.46	0.62	0.12	4.46	0.96	0.14	GO:0005516:calmodulin binding|GO:0006520:cellular amino acid metabolic process|GO:0034599:cellular response to oxidative stress|GO:0005575:cellular_component|GO:0005737:cytoplasm|GO:0005829:cytosol|GO:0009448:gamma-aminobutyric acid metabolic process|GO:0006538:glutamate catabolic process|GO:0004351:glutamate decarboxylase activity|GO:0006540:glutamate decarboxylation to succinate|GO:0006536:glut…
PM01G08570	0	0	0	0	0	0.1	0	0.1	GO:0003677:DNA binding|GO:0009738:abscisic acid-activated signaling pathway|GO:0071367:cellular response to brassinosteroid stimulus|GO:0001046:core promoter sequence-specific DNA binding|GO:0005737:cytoplasm|GO:0042742:defense response to bacterium|GO:0050832:defense response to fungus|GO:0048527:lateral root development|GO:0051782:negative regulation of cell division|GO:0005634:nucleus|GO:00101…
PM01G08580	0.84	0.36	0.42	0.65	1.44	0.93	1.37	1.98	GO:0005680:anaphase-promoting complex|GO:0031145:anaphase-promoting complex-dependent catabolic process|GO:0007049:cell cycle|GO:0051301:cell division|GO:0008283:cell proliferation|GO:0005813:centrosome|GO:0005737:cytoplasm|GO:0005829:cytosol|GO:0000278:mitotic cell cycle|GO:0007067:mitotic nuclear division|GO:0051436:negative regulation of ubiquitin-protein ligase activity involved in mitotic ce…
PM01G08590	36.69	48.95	33.42	65.12	98.3	80.45	81.86	40.75	GO:0005794:Golgi apparatus|GO:0000139:Golgi membrane|GO:0005768:endosome|GO:0010008:endosome membrane|GO:0016021:integral component of membrane|GO:0009505:plant-type cell wall|GO:0009506:plasmodesma|GO:0005802:trans-Golgi network|GO:0006810:transport|GO:0005774:vacuolar membrane
PM01G08600	9.9	2	1.7	7.06	3.28	5.9	52.83	0.82	GO:0009507:chloroplast|GO:0005737:cytoplasm|GO:0005829:cytosol|GO:0005634:nucleus|GO:0055114:oxidation-reduction process|GO:0016491:oxidoreductase activity|GO:0009651:response to salt stress
PM01G08610	5.08	3.46	0.23	0.41	3.69	0.71	0.4	0.03	GO:0003677:DNA binding|GO:0009507:chloroplast|GO:0010031:circumnutation|GO:0009590:detection of gravity|GO:0048444:floral organ morphogenesis|GO:0009630:gravitropism|GO:0009965:leaf morphogenesis|GO:0046872:metal ion binding|GO:0009959:negative gravitropism|GO:0003676:nucleic acid binding|GO:0005634:nucleus|GO:0009958:positive gravitropism|GO:0010601:positive regulation of auxin biosynthetic proc…
PM01G08620	8.37	3.39	3.81	5.11	8.94	8.12	8.02	12.8	GO:0003677:DNA binding|GO:0005737:cytoplasm|GO:0005730:nucleolus|GO:0005634:nucleus|GO:0005515:protein binding|GO:0042803:protein homodimerization activity|GO:0050793:regulation of developmental process|GO:0006355:regulation of transcription, DNA-templated|GO:0009723:response to ethylene|GO:0043565:sequence-specific DNA binding|GO:0003700:transcription factor activity, sequence-specific DNA bindi…
PM01G08630	4.55	1.09	0.92	1.38	1.84	1.23	3.61	6.58	GO:0008150:biological_process|GO:0005575:cellular_component|GO:0005737:cytoplasm|GO:0005829:cytosol|GO:0006020:inositol metabolic process|GO:0003674:molecular_function|GO:0005635:nuclear envelope
PM01G08640	6.28	8.95	0.19	2.71	21.65	16.9	3.82	1.79	GO:0008283:cell proliferation|GO:0070938:contractile ring|GO:0055028:cortical microtubule|GO:0000910:cytokinesis|GO:0000911:cytokinesis by cell plate formation|GO:0005737:cytoplasm|GO:0005829:cytosol|GO:0052096:formation by symbiont of syncytium involving giant cell for nutrient acquisition from host|GO:0042802:identical protein binding|GO:0019894:kinesin binding|GO:0005874:microtubule|GO:0008017…
PM01G08650	0.04	0.15	0.07	0.05	0.12	0.19	0.29	0.07
PM01G08660	1.84	2.85	2.23	1.55	1.12	4.34	0.92	3.64	GO:0007049:cell cycle|GO:0051301:cell division|GO:0005739:mitochondrion|GO:0051726:regulation of cell cycle
PM01G08670	0.9	0.04	0.02	0.23	1.1	0.57	0.52	0.09	GO:0005829:cytosol|GO:0004832:valine-tRNA ligase activity|GO:0006438:valyl-tRNA aminoacylation
PM01G08680	0	0.02	0	0	0	0.02	0.16	0.06	GO:0008150:biological_process|GO:0009507:chloroplast|GO:0016021:integral component of membrane|GO:0003674:molecular_function
PM01G08690	6.35	5.78	1.52	0.95	1.33	0.21	13.61	0.01	GO:0009738:abscisic acid-activated signaling pathway|GO:0009850:auxin metabolic process|GO:0030154:cell differentiation|GO:0009932:cell tip growth|GO:0071472:cellular response to salt stress|GO:0009507:chloroplast|GO:0010588:cotyledon vascular tissue pattern formation|GO:0005737:cytoplasm|GO:0016787:hydrolase activity|GO:0046855:inositol phosphate dephosphorylation|GO:0048016:inositol phosphate-m…
PM01G08700	11.38	14.84	5.85	7.66	7.92	0.65	63.7	0.4	GO:0003993:acid phosphatase activity|GO:0060349:bone morphogenesis|GO:0045453:bone resorption|GO:0009986:cell surface|GO:0030643:cellular phosphate ion homeostasis|GO:0050830:defense response to Gram-positive bacterium|GO:0016311:dephosphorylation|GO:0070062:extracellular exosome|GO:0005576:extracellular region|GO:0008199:ferric iron binding|GO:0008198:ferrous iron binding|GO:0016787:hydrolase ac…
PM01G08710	89.09	34.71	46.2	88.05	179.28	71.51	231.27	19.18	GO:0003993:acid phosphatase activity|GO:0060349:bone morphogenesis|GO:0045453:bone resorption|GO:0009986:cell surface|GO:0030643:cellular phosphate ion homeostasis|GO:0005829:cytosol|GO:0050830:defense response to Gram-positive bacterium|GO:0016311:dephosphorylation|GO:0070062:extracellular exosome|GO:0005576:extracellular region|GO:0005615:extracellular space|GO:0008199:ferric iron binding|GO:00…
PM01G08720	2.84	2.89	4.51	5	4.44	2.94	5.17	3.3	GO:0003993:acid phosphatase activity|GO:0009986:cell surface|GO:0030643:cellular phosphate ion homeostasis|GO:0005575:cellular_component|GO:0016311:dephosphorylation|GO:0005576:extracellular region|GO:0016787:hydrolase activity|GO:0016021:integral component of membrane|GO:0016020:membrane|GO:0008152:metabolic process|GO:0046872:metal ion binding|GO:0055114:oxidation-reduction process|GO:0004601:p…
PM01G08730	0.48	0.41	1.57	4.19	4.87	2.1	5.1	3.09	GO:0031418:L-ascorbic acid binding|GO:0005506:iron ion binding|GO:0005634:nucleus|GO:0055114:oxidation-reduction process|GO:0016705:oxidoreductase activity, acting on paired donors, with incorporation or reduction of molecular oxygen
PM01G08740	0.04	0.04	0.04	0.02	0.02	0.09	0.02	0.32
PM01G08750	10.45	12.12	1.73	4.08	17.5	17.27	8.68	23.18	GO:0008150:biological_process|GO:0005829:cytosol|GO:0005739:mitochondrion|GO:0003674:molecular_function|GO:0005634:nucleus|GO:0055114:oxidation-reduction process|GO:0016491:oxidoreductase activity|GO:0009506:plasmodesma|GO:0080167:response to karrikin
PM01G08760	3.71	0.79	0.19	0.42	4.83	1.5	0.06	0.13	GO:0048046:apoplast|GO:0005975:carbohydrate metabolic process|GO:0005618:cell wall|GO:0042546:cell wall biogenesis|GO:0016998:cell wall macromolecule catabolic process|GO:0071555:cell wall organization|GO:0005576:extracellular region|GO:0010154:fruit development|GO:0016798:hydrolase activity, acting on glycosyl bonds|GO:0004553:hydrolase activity, hydrolyzing O-glycosyl compounds|GO:0005887:integ…
PM01G08770	11.67	30.91	31.18	24.41	23.13	22.67	36.36	15.59	GO:0003677:DNA binding|GO:0001708:cell fate specification|GO:0070417:cellular response to cold|GO:0005677:chromatin silencing complex|GO:0009793:embryo development ending in seed dormancy|GO:0090421:embryonic meristem initiation|GO:0009880:embryonic pattern specification|GO:0010078:maintenance of root meristem identity|GO:0010492:maintenance of shoot apical meristem identity|GO:0046872:metal ion …
PM01G08780	1.78	1.43	1.66	3.78	7.65	1.9	2.07	0.96	GO:0030154:cell differentiation|GO:0010582:floral meristem determinacy|GO:0046872:metal ion binding|GO:0007275:multicellular organism development|GO:0003676:nucleic acid binding|GO:0005634:nucleus|GO:0009640:photomorphogenesis|GO:0046982:protein heterodimerization activity|GO:0009909:regulation of flower development|GO:0006355:regulation of transcription, DNA-templated|GO:0009739:response to gibb…
PM01G08790	3.04	3.66	5.53	6.1	5.65	5.1	6.3	4.94	GO:0003677:DNA binding|GO:0000978:RNA polymerase II core promoter proximal region sequence-specific DNA binding|GO:0005737:cytoplasm|GO:0005829:cytosol|GO:0010629:negative regulation of gene expression|GO:0005634:nucleus|GO:0045893:positive regulation of transcription, DNA-templated|GO:0090342:regulation of cell aging|GO:0010310:regulation of hydrogen peroxide metabolic process|GO:0006355:regulat…
PM01G08800	1.89	3.33	5.89	5.63	3.39	3.45	3.87	2.97	GO:0000120:RNA polymerase I transcription factor complex|GO:0008150:biological_process|GO:0005634:nucleus|GO:0006360:transcription from RNA polymerase I promoter
PM01G08810	27.51	25.01	16.43	17.69	25.9	25.42	16.83	45.53	GO:0005525:GTP binding|GO:0003924:GTPase activity|GO:0015450:P-P-bond-hydrolysis-driven protein transmembrane transporter activity|GO:0008150:biological_process|GO:0005623:cell|GO:0009507:chloroplast|GO:0009941:chloroplast envelope|GO:0019750:chloroplast localization|GO:0009707:chloroplast outer membrane|GO:0005829:cytosol|GO:0016787:hydrolase activity|GO:0016817:hydrolase activity, acting on aci…
PM01G08820	5.2	24.19	0.05	0.87	0.13	0.37	3.57	0.05	GO:0005737:cytoplasm|GO:0005829:cytosol|GO:0006952:defense response|GO:0016874:ligase activity|GO:0005634:nucleus|GO:0051865:protein autoubiquitination|GO:0016567:protein ubiquitination|GO:0002679:respiratory burst involved in defense response|GO:0010200:response to chitin|GO:0051707:response to other organism|GO:0010193:response to ozone|GO:0009414:response to water deprivation|GO:0004842:ubiqui…
PM01G08830	24.7	17.11	17.58	15	14.09	11.54	18.9	8.72	GO:0009507:chloroplast|GO:0005783:endoplasmic reticulum|GO:0016021:integral component of membrane|GO:0006886:intracellular protein transport|GO:0005739:mitochondrion|GO:0003674:molecular_function
PM01G08840	7.22	3.35	7.78	9.07	7.44	8.27	1.6	4.9	GO:0003723:RNA binding|GO:0034719:SMN-Sm protein complex|GO:0005685:U1 snRNP|GO:0005689:U12-type spliceosomal complex|GO:0005686:U2 snRNP|GO:0005687:U4 snRNP|GO:0005682:U5 snRNP|GO:0071013:catalytic step 2 spliceosome|GO:0000243:commitment complex|GO:0034715:pICln-Sm protein complex|GO:0071011:precatalytic spliceosome|GO:0071010:prespliceosome|GO:0000245:spliceosomal complex assembly|GO:0000387:s…
PM01G08850	23.45	10.79	17.02	24.43	25.17	23.53	35.93	51.03	GO:0003677:DNA binding|GO:0008150:biological_process|GO:0003682:chromatin binding|GO:0005634:nucleus
PM01G08860	27.15	73.97	54.96	41.11	33.34	39.51	25.44	33.29
PM01G08870	8.69	16.67	1.81	5.58	9.22	13.2	6.02	0.92	GO:0005524:ATP binding|GO:0009742:brassinosteroid mediated signaling pathway|GO:0040007:growth|GO:0016787:hydrolase activity|GO:0016301:kinase activity|GO:0005634:nucleus|GO:0016310:phosphorylation|GO:0005886:plasma membrane|GO:1900459:positive regulation of brassinosteroid mediated signaling pathway|GO:0004672:protein kinase activity|GO:0006468:protein phosphorylation|GO:0004674:protein serine/t…
PM01G08880	0.83	0.35	1.43	1.59	0.37	0.81	0.77	0.53
PM01G08890	0.2	0.22	0.61	1.41	1	1.1	0.74	1.78	GO:0008150:biological_process|GO:0005575:cellular_component|GO:0009507:chloroplast|GO:0031425:chloroplast RNA processing|GO:0016554:cytidine to uridine editing|GO:0009793:embryo development ending in seed dormancy|GO:0004519:endonuclease activity|GO:0016556:mRNA modification|GO:0006397:mRNA processing|GO:0000963:mitochondrial RNA processing|GO:0080156:mitochondrial mRNA modification|GO:0005739:mi…
PM01G08900	11.17	31.37	34.06	20.74	9.93	16.88	5.3	6.98	GO:0009838:abscission|GO:0060612:adipose tissue development|GO:0008150:biological_process|GO:0051301:cell division|GO:0005575:cellular_component|GO:0000910:cytokinesis|GO:0005737:cytoplasm|GO:0005811:lipid particle|GO:0034389:lipid particle organization|GO:0030496:midbody|GO:0005741:mitochondrial outer membrane|GO:0003674:molecular_function|GO:0030514:negative regulation of BMP signaling pathway|…
PM01G08910	0.82	0.33	0.68	1.3	1.42	0.94	0.76	3.69	GO:0005524:ATP binding|GO:0003689:DNA clamp loader activity|GO:0000077:DNA damage checkpoint|GO:0006281:DNA repair|GO:0006260:DNA replication|GO:0000076:DNA replication checkpoint|GO:0031389:Rad17 RFC-like complex|GO:0007049:cell cycle|GO:0006974:cellular response to DNA damage stimulus|GO:0000781:chromosome, telomeric region|GO:0000724:double-strand break repair via homologous recombination|GO:0…
PM01G08920	1.19	0.84	0.51	1.47	2.56	3.79	2.91	3.41	GO:0005525:GTP binding|GO:0003924:GTPase activity|GO:0032922:circadian regulation of gene expression|GO:0005737:cytoplasm|GO:0005622:intracellular|GO:0000166:nucleotide binding|GO:0005634:nucleus|GO:0009640:photomorphogenesis|GO:0015031:protein transport|GO:0007264:small GTPase mediated signal transduction
PM01G08930	5.47	3.69	2.23	0.67	0.25	4.56	13.64	8.61
PM01G08940	1.46	0.66	0.22	0.79	2.75	1.46	6.17	0.22	GO:0005618:cell wall|GO:0005576:extracellular region|GO:0016020:membrane|GO:0008152:metabolic process|GO:0009827:plant-type cell wall modification|GO:0006508:proteolysis|GO:0004252:serine-type endopeptidase activity|GO:0008236:serine-type peptidase activity
PM01G08950	15.09	8.52	15.86	15.98	29.12	30.6	6.51	2.88
PM01G08960	38.79	25.57	45.64	41.09	42.82	44.34	38.66	55.93	GO:0005829:cytosol|GO:0005634:nucleus|GO:0031593:polyubiquitin binding|GO:0043248:proteasome assembly|GO:0008540:proteasome regulatory particle, base subcomplex|GO:0043161:proteasome-mediated ubiquitin-dependent protein catabolic process
PM01G08970	8.71	19.45	36.24	28.53	24.19	23.04	15.4	21.11	GO:0006952:defense response|GO:0042742:defense response to bacterium|GO:0050832:defense response to fungus|GO:0005783:endoplasmic reticulum|GO:0005789:endoplasmic reticulum membrane|GO:0005576:extracellular region|GO:0005615:extracellular space|GO:0015908:fatty acid transport|GO:0000062:fatty-acyl-CoA binding|GO:0009514:glyoxysome|GO:0016021:integral component of membrane|GO:0032791:lead ion bind…
PM01G08980	24.44	11.57	0.39	0.64	7.53	6.9	7.94	6.64	GO:0005975:carbohydrate metabolic process|GO:0005618:cell wall|GO:0031176:endo-1,4-beta-xylanase activity|GO:0005576:extracellular region|GO:0004553:hydrolase activity, hydrolyzing O-glycosyl compounds|GO:0045493:xylan catabolic process
PM01G08990	4.74	3.66	5.62	5.8	6.69	5.5	7.51	3.23	GO:0034933:1-hydroxy-6-methoxypyrene methyltransferase activity|GO:0034931:1-hydroxypyrene methyltransferase activity|GO:0018707:1-phenanthrol methyltransferase activity|GO:0052624:2-phytyl-1,4-naphthoquinone methyltransferase activity|GO:0008425:2-polyprenyl-6-methoxy-1,4-benzoquinone methyltransferase activity|GO:0034807:4,5-dihydroxybenzo(a)pyrene methyltransferase activity|GO:0008169:C-methyl…
PM01G09000	14.3	9	0.08	1.43	9.37	2.86	7.46	0.16	GO:0031225:anchored component of membrane|GO:0008150:biological_process|GO:0005575:cellular_component|GO:0006952:defense response|GO:0005576:extracellular region|GO:0009682:induced systemic resistance|GO:0016021:integral component of membrane|GO:0003674:molecular_function|GO:0009617:response to bacterium|GO:0009723:response to ethylene|GO:0051707:response to other organism
PM01G09010	0.12	0.08	0.03	0.09	0.21	0.21	0.1	0	GO:0033549:MAP kinase phosphatase activity|GO:0009738:abscisic acid-activated signaling pathway|GO:0009734:auxin-activated signaling pathway|GO:0005516:calmodulin binding|GO:0035556:intracellular signal transduction|GO:0043407:negative regulation of MAP kinase activity|GO:0005634:nucleus|GO:0005515:protein binding|GO:0006470:protein dephosphorylation|GO:0004725:protein tyrosine phosphatase activi…
PM01G09020	3.89	6.57	5.36	7.58	5.94	4.25	3.74	2.05	GO:0003723:RNA binding|GO:0009451:RNA modification|GO:0008150:biological_process|GO:0009507:chloroplast|GO:1900865:chloroplast RNA modification|GO:0031425:chloroplast RNA processing|GO:0006397:mRNA processing|GO:0080156:mitochondrial mRNA modification|GO:0005739:mitochondrion|GO:0003674:molecular_function|GO:0008270:zinc ion binding
PM01G09030	0.48	0.68	0.25	0.25	0.41	0.34	0.11	0.22
PM01G09040	0.03	0.11	0.09	0.02	0.07	0.1	0	0.05	GO:0003677:DNA binding|GO:0005634:nucleus|GO:0006355:regulation of transcription, DNA-templated|GO:0008270:zinc ion binding
PM01G09050	10.73	27.2	9.39	5.35	10.07	12.54	5.99	5.8	GO:0005524:ATP binding|GO:0031225:anchored component of membrane|GO:0005575:cellular_component|GO:0006952:defense response|GO:0005576:extracellular region|GO:0009682:induced systemic resistance|GO:0016021:integral component of membrane|GO:0016301:kinase activity|GO:0003674:molecular_function|GO:0005886:plasma membrane|GO:0009506:plasmodesma|GO:0006468:protein phosphorylation|GO:0009617:response t…
PM01G09060	0.06	0	0	0.05	0.04	0.12	0	0
PM01G09070	2.89	0.04	0.01	0.9	2.96	0.72	2.68	0.14	GO:0003333:amino acid transmembrane transport|GO:0015171:amino acid transmembrane transporter activity|GO:0006865:amino acid transport|GO:0009734:auxin-activated signaling pathway|GO:0010588:cotyledon vascular tissue pattern formation|GO:0016021:integral component of membrane|GO:0016020:membrane|GO:0005886:plasma membrane|GO:0009624:response to nematode|GO:0048829:root cap development|GO:0015293:…
PM01G09080	2.65	3.03	2.11	1.96	4.03	1.12	3.7	0.17	GO:0005737:cytoplasm|GO:0005634:nucleus
PM01G09090	3.2	11.21	41.53	26.43	17.58	18.96	10.07	11.61	GO:0005852:eukaryotic translation initiation factor 3 complex|GO:0003743:translation initiation factor activity|GO:0031369:translation initiation factor binding|GO:0006413:translational initiation
PM01G09100	1.29	0.95	7.48	4.92	2.89	1.23	10.78	0.28	GO:0008150:biological_process|GO:0009507:chloroplast|GO:0009570:chloroplast stroma|GO:0005829:cytosol|GO:0031072:heat shock protein binding|GO:0046872:metal ion binding|GO:0003674:molecular_function|GO:0005634:nucleus|GO:0009536:plastid|GO:0006457:protein folding|GO:0051082:unfolded protein binding
PM01G09110	2.8	3.1	5.56	4.15	4.19	3.16	4.78	2.91	GO:0008839:4-hydroxy-tetrahydrodipicolinate reductase|GO:0070402:NADPH binding|GO:0009507:chloroplast|GO:0009570:chloroplast stroma|GO:0019877:diaminopimelate biosynthetic process|GO:0009089:lysine biosynthetic process via diaminopimelate|GO:0055114:oxidation-reduction process
PM01G09120	9.43	1.53	0.24	0.58	5.89	97.74	0.68	0.05	GO:0005618:cell wall|GO:0005576:extracellular region|GO:0009664:plant-type cell wall organization
PM01G09130	0.03	0.11	0.13	0.21	0.15	0.23	0.29	0.01	GO:0009061:anaerobic respiration|GO:0070483:detection of hypoxia|GO:0018171:peptidyl-cysteine oxidation
PM01G09140	0.16	0.17	0.28	0.33	0.35	0.37	0.32	0.08
PM01G09150	0.26	0	0	0	0	0.01	2.3	0
PM01G09160	36.85	32.34	5.47	11.41	6.76	7.54	7.13	1.05	GO:0042335:cuticle development|GO:0022626:cytosolic ribosome|GO:0005783:endoplasmic reticulum|GO:0005789:endoplasmic reticulum membrane|GO:0009913:epidermal cell differentiation|GO:0006633:fatty acid biosynthetic process|GO:0009922:fatty acid elongase activity|GO:0030497:fatty acid elongation|GO:0016021:integral component of membrane|GO:0008610:lipid biosynthetic process|GO:0016020:membrane|GO:00…
PM01G09170	0.13	0.27	0.27	0.05	0	0.05	0.52	7.87	GO:0071218:cellular response to misfolded protein|GO:0034620:cellular response to unfolded protein|GO:0061077:chaperone-mediated protein folding|GO:0009507:chloroplast|GO:0005737:cytoplasm|GO:0005829:cytosol|GO:0042802:identical protein binding|GO:0031990:mRNA export from nucleus in response to heat stress|GO:0005739:mitochondrion|GO:0003674:molecular_function|GO:0005634:nucleus|GO:0005515:protei…
PM01G09180	0	0	0	0	0	0.02	0	0.03
PM01G09190	0	0.03	0.01	0.01	0	0.09	0	0.03	GO:0103117:UDP-3-O-acyl-N-acetylglucosamine deacetylase activity|GO:0009507:chloroplast|GO:0005737:cytoplasm|GO:0009245:lipid A biosynthetic process|GO:2001289:lipid X metabolic process|GO:0046872:metal ion binding|GO:0005739:mitochondrion
PM01G09200	6.35	0.28	0.05	0.26	1.18	1.94	0.21	0.1	GO:0046658:anchored component of plasma membrane|GO:0007154:cell communication|GO:0042973:glucan endo-1,3-beta-D-glucosidase activity|GO:0009505:plant-type cell wall|GO:0030247:polysaccharide binding
PM01G09210	26.4	76.56	3.76	18.81	70.49	73.14	19.81	4.68	GO:0008150:biological_process|GO:0005737:cytoplasm|GO:0003674:molecular_function|GO:0005634:nucleus|GO:0005886:plasma membrane
PM01G09220	1	1.27	11.68	20.68	13.57	10.31	7.87	24.01	GO:0003677:DNA binding|GO:0009908:flower development|GO:0005634:nucleus|GO:0005515:protein binding|GO:0006355:regulation of transcription, DNA-templated|GO:0003700:transcription factor activity, sequence-specific DNA binding|GO:0006351:transcription, DNA-templated|GO:0010228:vegetative to reproductive phase transition of meristem
PM01G09230	6.57	12.98	15.51	22.04	36.26	25.94	20.99	11.84	GO:0005086:ARF guanyl-nucleotide exchange factor activity|GO:0005829:cytosol|GO:0005802:trans-Golgi network|GO:0016192:vesicle-mediated transport
PM01G09240	0.49	0.18	0	0.05	0.19	0.12	0.65	0.12	GO:0008150:biological_process|GO:0009867:jasmonic acid mediated signaling pathway|GO:0010311:lateral root formation|GO:0005634:nucleus|GO:0010199:organ boundary specification between lateral organs and the meristem|GO:1900150:regulation of defense response to fungus|GO:0009753:response to jasmonic acid|GO:0010089:xylem development
PM01G09250	23.01	17.98	19.08	12.35	12.58	14.09	10.24	4.13	GO:0005524:ATP binding|GO:0004176:ATP-dependent peptidase activity|GO:0016887:ATPase activity|GO:0009294:DNA mediated transformation|GO:0031897:Tic complex|GO:0005618:cell wall|GO:0009507:chloroplast|GO:0009941:chloroplast envelope|GO:0009706:chloroplast inner membrane|GO:0031969:chloroplast membrane|GO:0009658:chloroplast organization|GO:0009570:chloroplast stroma|GO:0009535:chloroplast thylakoi…
PM01G09260	9.38	12.08	36.36	21.05	13.82	13.35	9.29	7.41	GO:0008150:biological_process|GO:0003674:molecular_function|GO:0005634:nucleus
PM01G09270	0.24	0.14	0.57	0.24	0.04	0.11	0.93	1.21
PM01G09280	4.87	11.03	1.36	1.24	3.31	4.11	4.36	0.78	GO:0016597:amino acid binding|GO:0006464:cellular protein modification process|GO:0005575:cellular_component|GO:0009507:chloroplast|GO:0005829:cytosol|GO:0008152:metabolic process|GO:0005634:nucleus|GO:0016567:protein ubiquitination|GO:0006521:regulation of cellular amino acid metabolic process|GO:0009737:response to abscisic acid|GO:0009735:response to cytokinin|GO:0043130:ubiquitin binding|GO:0…
PM01G09290	12.77	18.81	32.53	35.09	27.89	27.93	26.45	35.01	GO:0005776:autophagosome|GO:0000045:autophagosome assembly|GO:0044805:late nucleophagy|GO:0000422:mitophagy|GO:0034727:piecemeal microautophagy of nucleus|GO:0000407:pre-autophagosomal structure|GO:0034497:protein localization to pre-autophagosomal structure
PM01G09300	0.02	0	0.1	0	0.02	0	0.05	0	GO:0000977:RNA polymerase II regulatory region sequence-specific DNA binding|GO:0090575:RNA polymerase II transcription factor complex|GO:0010106:cellular response to iron ion starvation|GO:0055072:iron ion homeostasis|GO:0005634:nucleus|GO:0006357:regulation of transcription from RNA polymerase II promoter|GO:0003700:transcription factor activity, sequence-specific DNA binding
PM01G09310	0	0	0	0.01	0	0	0	6.25	GO:0016020:membrane|GO:0016709:oxidoreductase activity, acting on paired donors, with incorporation or reduction of molecular oxygen, NAD(P)H as one donor, and incorporation of one atom of oxygen|GO:0044550:secondary metabolite biosynthetic process
PM01G09320	3.31	2.29	4.39	3.23	3.36	2.95	1.54	1.48
PM01G09330	1.66	1.18	0.93	0.77	0.4	5.5	0	0.07	GO:0005524:ATP binding|GO:0042626:ATPase activity, coupled to transmembrane movement of substances|GO:0016021:integral component of membrane|GO:0005634:nucleus|GO:0005886:plasma membrane|GO:0009555:pollen development|GO:0010584:pollen exine formation|GO:0010152:pollen maturation
PM01G09340	3.04	1.42	0.34	0.85	1.63	1.21	0.33	0.34	GO:0008150:biological_process|GO:0009507:chloroplast|GO:0003674:molecular_function|GO:0005634:nucleus|GO:0005515:protein binding
PM01G09350	15.7	8.32	10.31	7.94	6.09	6.75	6.81	12.04	GO:0004045:aminoacyl-tRNA hydrolase activity|GO:0005762:mitochondrial large ribosomal subunit|GO:0070126:mitochondrial translational termination|GO:0005739:mitochondrion|GO:0072344:rescue of stalled ribosome|GO:0043022:ribosome binding|GO:0016150:translation release factor activity, codon nonspecific|GO:0016149:translation release factor activity, codon specific
PM01G09360	7.15	4.5	7.41	6.65	8.65	5.57	9.05	10.49	GO:0006884:cell volume homeostasis|GO:0006821:chloride transport|GO:0005737:cytoplasm|GO:0005856:cytoskeleton|GO:0005829:cytosol|GO:0005216:ion channel activity|GO:0034709:methylosome|GO:0005654:nucleoplasm|GO:0005634:nucleus|GO:0034715:pICln-Sm protein complex|GO:0005886:plasma membrane|GO:0044822:poly(A) RNA binding|GO:0046982:protein heterodimerization activity|GO:0000387:spliceosomal snRNP as…
PM01G09370	193.37	87.39	61.08	91.22	134.72	97.61	158.58	372.23	GO:0022627:cytosolic small ribosomal subunit|GO:0003735:structural constituent of ribosome
PM01G09380	9.56	14.72	2.67	4.03	7.31	6.42	4.26	2.58	GO:0005794:Golgi apparatus|GO:0032580:Golgi cisterna membrane|GO:0050378:UDP-glucuronate 4-epimerase activity|GO:0005975:carbohydrate metabolic process|GO:0003824:catalytic activity|GO:0050662:coenzyme binding|GO:0050829:defense response to Gram-negative bacterium|GO:0050832:defense response to fungus|GO:0005768:endosome|GO:0033481:galacturonate biosynthetic process|GO:0016021:integral component …
PM01G09390	0	0	0	0.02	0	0	0	0.04	GO:0048046:apoplast|GO:0005507:copper ion binding|GO:0005576:extracellular region|GO:0052716:hydroquinone:oxygen oxidoreductase activity|GO:0046274:lignin catabolic process|GO:0055114:oxidation-reduction process|GO:0016722:oxidoreductase activity, oxidizing metal ions
PM01G09400	81.79	72.1	48.07	43.3	39.28	56.89	27.5	8.81	GO:0008150:biological_process|GO:0016021:integral component of membrane|GO:0003674:molecular_function
PM01G09410	10.13	2.56	0.82	1.79	8.95	8.77	3.94	16.39	GO:0008150:biological_process|GO:0003674:molecular_function|GO:0005634:nucleus
PM01G09420	32.01	17.85	6.55	4.58	18.67	17.58	14.67	1.43	GO:0008150:biological_process|GO:0005509:calcium ion binding|GO:0005575:cellular_component|GO:0009507:chloroplast|GO:0005737:cytoplasm|GO:0005783:endoplasmic reticulum|GO:0005789:endoplasmic reticulum membrane|GO:0071786:endoplasmic reticulum tubular network organization|GO:0016021:integral component of membrane|GO:0016020:membrane|GO:0008017:microtubule binding|GO:0005739:mitochondrion|GO:000708…
PM01G09430	0	0	0	0	0.07	0	0	0
PM01G09440	37.88	8.83	0.02	0.34	0.73	20.04	0	0
PM01G09450	10.97	8.83	13.92	4.16	0.34	3.55	0	0	GO:0016602:CCAAT-binding factor complex|GO:0003677:DNA binding|GO:0000978:RNA polymerase II core promoter proximal region sequence-specific DNA binding|GO:0009738:abscisic acid-activated signaling pathway|GO:0000436:carbon catabolite activation of transcription from RNA polymerase II promoter|GO:0071469:cellular response to alkaline pH|GO:0071280:cellular response to copper ion|GO:0035690:cellula…
PM01G09460	55.44	56.77	57.42	76.67	87.21	79.67	61.95	87.7	GO:0015991:ATP hydrolysis coupled proton transport|GO:0015986:ATP synthesis coupled proton transport|GO:0016887:ATPase activity|GO:0051117:ATPase binding|GO:0005794:Golgi apparatus|GO:0031669:cellular response to nutrient levels|GO:0071472:cellular response to salt stress|GO:0009507:chloroplast|GO:0009941:chloroplast envelope|GO:0005737:cytoplasm|GO:0009678:hydrogen-translocating pyrophosphatase …
PM01G09470	0.01	0	0.01	0.07	0.05	0.5	0.05	0.02	GO:0005783:endoplasmic reticulum
PM01G09480	2.71	1.65	1.47	2.08	3.6	3.42	2.14	0.75	GO:0005524:ATP binding|GO:0016021:integral component of membrane|GO:0005886:plasma membrane|GO:0004672:protein kinase activity|GO:0006468:protein phosphorylation|GO:0004674:protein serine/threonine kinase activity
PM01G09490	0.94	0.78	0.28	0.47	1.9	2.88	0.9	7.22	GO:0071216:cellular response to biotic stimulus|GO:0009267:cellular response to starvation|GO:0005829:cytosol|GO:0070940:dephosphorylation of RNA polymerase II C-terminal domain|GO:0036180:filamentous growth of a population of unicellular organisms in response to biotic stimulus|GO:0036170:filamentous growth of a population of unicellular organisms in response to starvation|GO:0072542:protein pho…
PM01G09500	9.58	27.52	0.87	1.22	3.06	2.14	7.14	0.04	GO:0052689:carboxylic ester hydrolase activity|GO:0005575:cellular_component|GO:0005737:cytoplasm|GO:0048444:floral organ morphogenesis|GO:0009740:gibberellic acid mediated signaling pathway|GO:0010331:gibberellin binding|GO:0010476:gibberellin mediated signaling pathway|GO:0016787:hydrolase activity|GO:0008152:metabolic process|GO:0005634:nucleus|GO:0009860:pollen tube growth|GO:0009939:positive…
PM01G09510	7.93	26.21	10.6	14.27	12.04	11.69	13.3	11.76	GO:0035339:SPOTS complex|GO:0006915:apoptotic process|GO:0009058:biosynthetic process|GO:0003824:catalytic activity|GO:0016049:cell growth|GO:0046513:ceramide biosynthetic process|GO:0009507:chloroplast|GO:0005783:endoplasmic reticulum|GO:0005789:endoplasmic reticulum membrane|GO:0016021:integral component of membrane|GO:0006629:lipid metabolic process|GO:0016020:membrane|GO:1904504:positive regu…
PM01G09520	6.6	0.84	0.96	2.59	1.34	0.04	12.77	0	GO:0003677:DNA binding|GO:0009507:chloroplast|GO:0005737:cytoplasm|GO:0048262:determination of dorsal/ventral asymmetry|GO:0009793:embryo development ending in seed dormancy|GO:0009908:flower development|GO:0009630:gravitropism|GO:0005634:nucleus|GO:0006355:regulation of transcription, DNA-templated|GO:0010114:response to red light|GO:0003700:transcription factor activity, sequence-specific DNA b…
PM01G09530	11.39	8.34	9.13	18.99	17.29	18.55	14.55	14.94	GO:0005524:ATP binding|GO:0005737:cytoplasm|GO:0005829:cytosol|GO:0006696:ergosterol biosynthetic process|GO:0010142:farnesyl diphosphate biosynthetic process, mevalonate pathway|GO:0019287:isopentenyl diphosphate biosynthetic process, mevalonate pathway|GO:0008299:isoprenoid biosynthetic process|GO:0016301:kinase activity|GO:0006629:lipid metabolic process|GO:0005739:mitochondrion|GO:0000166:nuc…
PM01G09540	1.37	0.05	0	0.27	1	1.23	2.37	0.04	GO:0005524:ATP binding|GO:0009926:auxin polar transport|GO:0009734:auxin-activated signaling pathway|GO:0048825:cotyledon development|GO:0005737:cytoplasm|GO:0005829:cytosol|GO:0009630:gravitropism|GO:0035556:intracellular signal transduction|GO:0016301:kinase activity|GO:0005634:nucleus|GO:0005886:plasma membrane|GO:0006468:protein phosphorylation|GO:0004674:protein serine/threonine kinase activ…
PM01G09550	4.77	6.18	9.03	7.44	7.2	6.45	4.64	9.6	GO:0003723:RNA binding|GO:0008150:biological_process|GO:0009870:defense response signaling pathway, resistance gene-dependent|GO:0042742:defense response to bacterium|GO:0005622:intracellular|GO:0000398:mRNA splicing, via spliceosome|GO:0003674:molecular_function|GO:0003676:nucleic acid binding|GO:0005654:nucleoplasm|GO:0005634:nucleus|GO:0005515:protein binding
PM01G09560	34.05	18.32	19.54	17.45	17.09	19.66	18.12	14.62	GO:0071568:UFM1 transferase activity|GO:0008150:biological_process|GO:0005575:cellular_component|GO:0009507:chloroplast|GO:0070062:extracellular exosome|GO:0046331:lateral inhibition|GO:0003674:molecular_function|GO:1990592:protein K69-linked ufmylation|GO:0005515:protein binding|GO:0071569:protein ufmylation|GO:0034976:response to endoplasmic reticulum stress
PM01G09570	0.96	0.22	0.1	0.12	0.28	2.83	0.04	0.17
PM01G09580	8.83	6.82	1.47	2.23	10.61	8.36	10.39	0.13	GO:0008150:biological_process|GO:0016021:integral component of membrane|GO:0005739:mitochondrion|GO:0003674:molecular_function
PM01G09590	4.42	2.26	3.48	5.94	5.46	3.33	5.5	8.17	GO:0016021:integral component of membrane|GO:0005744:mitochondrial inner membrane presequence translocase complex|GO:0032981:mitochondrial respiratory chain complex I assembly|GO:0033617:mitochondrial respiratory chain complex IV assembly|GO:0005739:mitochondrion|GO:0003674:molecular_function|GO:0030150:protein import into mitochondrial matrix|GO:0090351:seedling development
PM01G09600	2.47	2.1	3.22	4.98	4.74	3.61	4.06	7.74	GO:0005744:mitochondrial inner membrane presequence translocase complex|GO:0032981:mitochondrial respiratory chain complex I assembly|GO:0033617:mitochondrial respiratory chain complex IV assembly|GO:0030150:protein import into mitochondrial matrix
PM01G09610	4.26	1.63	1.19	1.55	3.16	2.31	0	0.7	GO:0043531:ADP binding|GO:0005524:ATP binding|GO:0005525:GTP binding|GO:0008219:cell death|GO:0005575:cellular_component|GO:0005737:cytoplasm|GO:0006952:defense response|GO:0042742:defense response to bacterium|GO:0009816:defense response to bacterium, incompatible interaction|GO:0016045:detection of bacterium|GO:0005622:intracellular|GO:0005739:mitochondrion|GO:0000166:nucleotide binding|GO:0005…
PM01G09620	59.58	13.9	19.38	15.14	6.59	3.26	0.23	0.05	GO:0015196:L-tryptophan transmembrane transporter activity|GO:0005302:L-tyrosine transmembrane transporter activity|GO:0005275:amine transmembrane transporter activity|GO:0003333:amino acid transmembrane transport|GO:0015171:amino acid transmembrane transporter activity|GO:0006865:amino acid transport|GO:0015173:aromatic amino acid transmembrane transporter activity|GO:0015801:aromatic amino acid…
PM01G09630	3.94	1.49	0.25	0.9	2.25	0.31	5.53	0.45	GO:0047617:acyl-CoA hydrolase activity|GO:0047372:acylglycerol lipase activity|GO:0005737:cytoplasm|GO:0006952:defense response|GO:0005576:extracellular region|GO:0019374:galactolipid metabolic process|GO:0016787:hydrolase activity|GO:0016042:lipid catabolic process|GO:0016020:membrane|GO:0045735:nutrient reservoir activity|GO:0004620:phospholipase activity|GO:0006644:phospholipid metabolic proce…
PM01G09640	11.88	21.46	29.96	36.42	41.91	40.87	31.81	44.57	GO:0080008:Cul4-RING E3 ubiquitin ligase complex|GO:0000124:SAGA complex|GO:0008150:biological_process|GO:0005575:cellular_component|GO:0005829:cytosol|GO:0016573:histone acetylation|GO:0009867:jasmonic acid mediated signaling pathway|GO:0003674:molecular_function|GO:0045892:negative regulation of transcription, DNA-templated|GO:0005634:nucleus|GO:0010072:primary shoot apical meristem specificati…
PM01G09650	28.91	47.81	20.63	35.5	32.6	37.76	44.36	28.54	GO:0010181:FMN binding|GO:0009073:aromatic amino acid family biosynthetic process|GO:0009423:chorismate biosynthetic process|GO:0004107:chorismate synthase activity|GO:0005829:cytosol
PM01G09660	17.93	22.69	43.01	44.5	64.28	37.54	55	26.06	GO:0080144:amino acid homeostasis|GO:0005737:cytoplasm|GO:0005769:early endosome|GO:0008333:endosome to lysosome transport|GO:0070062:extracellular exosome|GO:0016874:ligase activity|GO:0046872:metal ion binding|GO:0045744:negative regulation of G-protein coupled receptor protein signaling pathway|GO:0043951:negative regulation of cAMP-mediated signaling|GO:0005634:nucleus|GO:0005886:plasma membr…
PM01G09670	7.74	8.83	9.21	5.91	5.58	6.87	5.08	14.19	GO:0048046:apoplast|GO:0004565:beta-galactosidase activity|GO:0030246:carbohydrate binding|GO:0005975:carbohydrate metabolic process|GO:0005618:cell wall|GO:0005576:extracellular region|GO:0005773:vacuole
PM01G09680	0.13	0	0.09	0.1	0.02	0.05	0.18	0.31
PM01G09690	12.12	16.51	38.65	23.58	11.99	7.89	19.63	1.58	GO:0007623:circadian rhythm|GO:0010018:far-red light signaling pathway|GO:0003674:molecular_function|GO:0005634:nucleus|GO:0042753:positive regulation of circadian rhythm|GO:0045893:positive regulation of transcription, DNA-templated|GO:0005515:protein binding|GO:0010017:red or far-red light signaling pathway|GO:0009585:red, far-red light phototransduction|GO:0006355:regulation of transcription, …
PM01G09700	33.22	38.62	75.32	64.69	22.98	35.84	109.42	28.73	GO:0005524:ATP binding|GO:0016036:cellular response to phosphate starvation|GO:0005737:cytoplasm|GO:0005829:cytosol|GO:0009817:defense response to fungus, incompatible interaction|GO:0006094:gluconeogenesis|GO:0016301:kinase activity|GO:0016020:membrane|GO:0005730:nucleolus|GO:0005634:nucleus|GO:0004612:phosphoenolpyruvate carboxykinase (ATP) activity|GO:0016310:phosphorylation|GO:0046686:respons…
PM01G09710	1.21	2.53	7.04	7.28	0.57	0.12	4.43	0.08	GO:0007165:signal transduction
PM01G09720	1.05	0.31	0	0.13	1.15	0.55	1.27	0.07	GO:0016020:membrane|GO:0007165:signal transduction
PM01G09730	0	0.01	0.01	0	0	0.01	0	0
PM01G09740	3.36	3.59	2.45	3.37	6.2	3.25	5.53	10.04	GO:0009507:chloroplast|GO:0009570:chloroplast stroma|GO:0006541:glutamine metabolic process|GO:0000105:histidine biosynthetic process|GO:0000107:imidazoleglycerol-phosphate synthase activity|GO:0005622:intracellular|GO:0016833:oxo-acid-lyase activity|GO:0009536:plastid
PM01G09750	1.23	0.34	0.01	0.27	2.55	6.53	0.35	0.1	GO:0005737:cytoplasm|GO:0043087:regulation of GTPase activity
PM01G09760	1.6	0.39	0.15	0.23	2.01	0.93	0.63	8.49	GO:0008150:biological_process|GO:0003674:molecular_function|GO:0005634:nucleus
PM01G09770	0.33	0.11	0.2	0.1	0.8	1.92	0.17	0.65	GO:0008150:biological_process|GO:0009507:chloroplast|GO:0005737:cytoplasm|GO:0005739:mitochondrion|GO:0003674:molecular_function|GO:0005634:nucleus|GO:0015031:protein transport|GO:0006979:response to oxidative stress|GO:0008270:zinc ion binding
PM01G09780	8.25	7.39	20.74	23.6	14.05	10.37	12.07	21.11	GO:0003677:DNA binding|GO:0003723:RNA binding|GO:0000981:RNA polymerase II transcription factor activity, sequence-specific DNA binding|GO:0060918:auxin transport|GO:0003824:catalytic activity|GO:0009507:chloroplast|GO:0009658:chloroplast organization|GO:0009793:embryo development ending in seed dormancy|GO:0042802:identical protein binding|GO:0009942:longitudinal axis specification|GO:0016592:me…
PM01G09790	8.01	3.25	5.68	5.86	3.95	3.11	5	0.21	GO:0008150:biological_process|GO:0009507:chloroplast|GO:0005737:cytoplasm|GO:0005739:mitochondrion|GO:0003674:molecular_function|GO:0005634:nucleus|GO:0015031:protein transport|GO:0006979:response to oxidative stress|GO:0008270:zinc ion binding
PM01G09800	0	0	0	0	0	0	0	0
PM01G09810	0	0	0	0	0	0	0	0.04
PM01G09820	51.71	8.65	33.06	27.96	35.95	30.53	39.29	35.05	GO:0008150:biological_process|GO:0005739:mitochondrion|GO:0003674:molecular_function
PM01G09830	16.45	29.21	3.21	3.78	5.43	3.76	49.7	0.22	GO:0052689:carboxylic ester hydrolase activity|GO:0005575:cellular_component|GO:0005737:cytoplasm|GO:0048444:floral organ morphogenesis|GO:0009740:gibberellic acid mediated signaling pathway|GO:0010331:gibberellin binding|GO:0010476:gibberellin mediated signaling pathway|GO:0016787:hydrolase activity|GO:0008152:metabolic process|GO:0005634:nucleus|GO:0009939:positive regulation of gibberellic aci…
PM01G09840	0.2	0.29	0.21	0.24	0.46	0.52	0.45	0.11
PM01G09850	3.27	3.64	3.7	1.55	0.98	0.41	0.43	1.04
PM01G09860	8.91	6.7	3.59	3.92	4.24	2.53	0.09	0.1
PM01G09870	0.03	0	0	0.02	0.01	0.18	0	0	GO:0008150:biological_process|GO:0007155:cell adhesion|GO:0005575:cellular_component|GO:0005576:extracellular region|GO:0016021:integral component of membrane|GO:0003674:molecular_function
PM01G09880	0.4	0.33	0	0.01	0.27	3.85	0.16	0	GO:0008150:biological_process|GO:0007155:cell adhesion|GO:0005575:cellular_component|GO:0005576:extracellular region|GO:0016021:integral component of membrane|GO:0003674:molecular_function
PM01G09890	8.88	0.28	0	0.2	0.23	18.2	52.08	1.02	GO:0046658:anchored component of plasma membrane|GO:0048653:anther development|GO:0048046:apoplast|GO:0005507:copper ion binding|GO:0009055:electron carrier activity|GO:0031012:extracellular matrix|GO:0046872:metal ion binding|GO:0055114:oxidation-reduction process|GO:0005886:plasma membrane|GO:0009856:pollination|GO:0005578:proteinaceous extracellular matrix
PM01G09900	12.21	9.78	21.04	20.4	17.06	16.82	21.18	14.45	GO:0036513:Derlin-1 retrotranslocation complex|GO:0030433:ER-associated ubiquitin-dependent protein catabolic process|GO:0036503:ERAD pathway|GO:0000836:Hrd1p ubiquitin ligase complex|GO:0007219:Notch signaling pathway|GO:0008150:biological_process|GO:0005783:endoplasmic reticulum|GO:1904380:endoplasmic reticulum mannose trimming|GO:0005789:endoplasmic reticulum membrane|GO:0044322:endoplasmic re…
PM01G09910	10.06	10.25	16.83	17.61	15.26	15.59	14.17	21.15	GO:0017112:Rab guanyl-nucleotide exchange factor activity|GO:0009507:chloroplast|GO:0043547:positive regulation of GTPase activity|GO:0055037:recycling endosome
PM01G09920	3.42	5.87	2.69	4.35	22.23	4.12	2.26	4.82	GO:0005794:Golgi apparatus|GO:0008150:biological_process|GO:0005737:cytoplasm|GO:0012505:endomembrane system|GO:0016021:integral component of membrane|GO:0003674:molecular_function|GO:0017022:myosin binding|GO:0005634:nucleus|GO:0030133:transport vesicle
PM01G09930	0.11	0.04	0	0	0.04	0.57	0	0.01	GO:0005525:GTP binding|GO:0003924:GTPase activity|GO:0006915:apoptotic process|GO:0005623:cell|GO:0005737:cytoplasm|GO:0005829:cytosol|GO:0006952:defense response|GO:0051607:defense response to virus|GO:0005789:endoplasmic reticulum membrane|GO:0045087:innate immune response|GO:0005874:microtubule|GO:0045071:negative regulation of viral genome replication|GO:0031965:nuclear membrane|GO:0005643:nu…
PM01G09940	0.21	0.04	0.08	0.05	0.17	7.6	0.11	0.94	GO:0005886:plasma membrane|GO:0022857:transmembrane transporter activity|GO:0006810:transport
PM01G09950	2.68	2.34	5.68	5.46	3.94	4.66	6.44	5.19	GO:0008150:biological_process|GO:0005575:cellular_component|GO:0016787:hydrolase activity|GO:0016021:integral component of membrane|GO:0016020:membrane|GO:0046872:metal ion binding|GO:0003674:molecular_function|GO:0004722:protein serine/threonine phosphatase activity
PM01G09960	0.02	0.03	0	0	0	0.01	0.55	0.01	GO:0005525:GTP binding|GO:0003924:GTPase activity|GO:0005623:cell|GO:0035457:cellular response to interferon-alpha|GO:0005737:cytoplasm|GO:0005829:cytosol|GO:0051607:defense response to virus|GO:0005783:endoplasmic reticulum|GO:0002376:immune system process|GO:0045087:innate immune response|GO:0016020:membrane|GO:0005874:microtubule|GO:0000166:nucleotide binding|GO:0005634:nucleus|GO:0048471:peri…
PM01G09970	1.25	0.18	0.01	0.04	1.01	0.22	2.51	0.01	GO:0003677:DNA binding|GO:0009718:anthocyanin-containing compound biosynthetic process|GO:0016036:cellular response to phosphate starvation|GO:0009941:chloroplast envelope|GO:0042538:hyperosmotic salinity response|GO:0005634:nucleus|GO:0005515:protein binding|GO:0046983:protein dimerization activity|GO:0006355:regulation of transcription, DNA-templated|GO:0010200:response to chitin|GO:0048364:roo…
PM01G09980	26.84	9.77	4.14	0.57	3.37	12.73	35.05	8.53	GO:0005794:Golgi apparatus|GO:0005509:calcium ion binding|GO:0016023:cytoplasmic, membrane-bounded vesicle|GO:0005783:endoplasmic reticulum|GO:0005576:extracellular region|GO:0008289:lipid binding|GO:0016042:lipid catabolic process|GO:0005634:nucleus|GO:0004623:phospholipase A2 activity|GO:0009555:pollen development|GO:0009846:pollen germination|GO:0009860:pollen tube growth|GO:0005773:vacuole
PM01G09990	8.24	5.91	12.47	11.23	9.9	9.51	5.1	14.98	GO:0030544:Hsp70 protein binding|GO:0008150:biological_process|GO:0005737:cytoplasm|GO:0045171:intercellular bridge|GO:0000398:mRNA splicing, via spliceosome|GO:0003674:molecular_function|GO:0005654:nucleoplasm|GO:0005634:nucleus|GO:0006457:protein folding
PM01G10000	37.39	37.9	27.19	16.25	11.81	9.36	87.69	0.16	GO:0008150:biological_process|GO:0009507:chloroplast|GO:0003674:molecular_function|GO:0005634:nucleus|GO:0010075:regulation of meristem growth
PM01G10010	2.41	3.82	4.76	10.39	12.61	8.47	9.73	11.53	GO:0006607:NLS-bearing protein import into nucleus|GO:0008536:Ran GTPase binding|GO:0005737:cytoplasm|GO:0005829:cytosol|GO:0008139:nuclear localization sequence binding|GO:0031965:nuclear membrane|GO:0034399:nuclear periphery|GO:0005643:nuclear pore|GO:0005634:nucleus|GO:0000059:protein import into nucleus, docking|GO:0000060:protein import into nucleus, translocation|GO:0008565:protein transpor…
PM01G10020	1.16	0.62	0.01	0.15	1.91	0.36	0.37	0	GO:0016308:1-phosphatidylinositol-4-phosphate 5-kinase activity|GO:0005524:ATP binding|GO:0051015:actin filament binding|GO:0003785:actin monomer binding|GO:0016324:apical plasma membrane|GO:0005975:carbohydrate metabolic process|GO:0006520:cellular amino acid metabolic process|GO:0071482:cellular response to light stimulus|GO:0072583:clathrin-mediated endocytosis|GO:0005737:cytoplasm|GO:0005829:…
PM01G10030	11.74	4.87	9.22	9.96	11.99	8.03	11.46	33.48	GO:0005737:cytoplasm|GO:0035145:exon-exon junction complex|GO:1903259:exon-exon junction complex disassembly|GO:0000184:nuclear-transcribed mRNA catabolic process, nonsense-mediated decay|GO:0005730:nucleolus|GO:0005654:nucleoplasm|GO:0005634:nucleus|GO:0044822:poly(A) RNA binding|GO:0010628:positive regulation of gene expression|GO:0045727:positive regulation of translation|GO:0005515:protein bi…
PM01G10040	7.19	15.91	10.36	9.87	9.36	8.22	8.3	2.81	GO:0005737:cytoplasm|GO:0004702:receptor signaling protein serine/threonine kinase activity
PM01G10050	1.48	1.93	1.99	3.6	5.16	4.2	2.98	7.43	GO:0005524:ATP binding|GO:0006281:DNA repair|GO:0007049:cell cycle|GO:0006974:cellular response to DNA damage stimulus|GO:0005575:cellular_component|GO:0016787:hydrolase activity|GO:0022008:neurogenesis|GO:0000166:nucleotide binding|GO:0005634:nucleus|GO:0048477:oogenesis|GO:0005886:plasma membrane
PM01G10060	0	0	0	0	0	0.01	0	0.07	GO:0016324:apical plasma membrane|GO:0008150:biological_process|GO:0005901:caveola|GO:0071456:cellular response to hypoxia|GO:0006897:endocytosis|GO:0005768:endosome|GO:0007163:establishment or maintenance of cell polarity|GO:0010324:membrane invagination|GO:0031579:membrane raft organization|GO:0003674:molecular_function|GO:0005886:plasma membrane|GO:0009506:plasmodesma|GO:0048364:root developme…
PM01G10070	22.5	10.86	17.88	17.99	16.56	14.35	21.3	33.95	GO:0003723:RNA binding|GO:0005737:cytoplasm|GO:0005829:cytosol|GO:0001701:in utero embryonic development|GO:0005845:mRNA cap binding complex|GO:0017148:negative regulation of translation|GO:0005634:nucleus|GO:0044822:poly(A) RNA binding|GO:0006417:regulation of translation|GO:0006412:translation|GO:0003743:translation initiation factor activity|GO:0006413:translational initiation|GO:0031625:ubiqu…
PM01G10080	0.48	0.27	0.18	0.28	0.42	0.35	0.39	0.25
PM01G10090	4.84	3.38	0.8	2.98	8.35	5.3	10.53	0.72	GO:0008150:biological_process|GO:0005575:cellular_component|GO:0016021:integral component of membrane|GO:0003674:molecular_function|GO:0005886:plasma membrane|GO:0009269:response to desiccation
PM01G10100	0	0.06	0	0.07	0	0	0	0.28	GO:0006952:defense response|GO:0005886:plasma membrane|GO:0009506:plasmodesma|GO:0006468:protein phosphorylation|GO:0004674:protein serine/threonine kinase activity
PM01G10110	9.11	8.28	12.96	19.17	15.7	11.95	16.4	23.95	GO:0003677:DNA binding|GO:0005525:GTP binding|GO:0032794:GTPase activating protein binding|GO:0005096:GTPase activator activity|GO:0006895:Golgi to endosome transport|GO:0005089:Rho guanyl-nucleotide exchange factor activity|GO:0008150:biological_process|GO:0000919:cell plate assembly|GO:0042546:cell wall biogenesis|GO:0005575:cellular_component|GO:0005737:cytoplasm|GO:0005829:cytosol|GO:0009793:…
PM01G10120	0.77	0.49	0	0.11	1.72	0.72	0.12	0.2	GO:0003677:DNA binding|GO:0071497:cellular response to freezing|GO:0034605:cellular response to heat|GO:0042742:defense response to bacterium|GO:0009873:ethylene-activated signaling pathway|GO:0005634:nucleus|GO:0045893:positive regulation of transcription, DNA-templated|GO:0010941:regulation of cell death|GO:1900030:regulation of pectin biosynthetic process|GO:0006355:regulation of transcription…
PM01G10130	0.2	0.02	0	0	0.01	0.06	4.19	0	GO:0005634:nucleus|GO:0006355:regulation of transcription, DNA-templated|GO:0043565:sequence-specific DNA binding|GO:0003700:transcription factor activity, sequence-specific DNA binding
PM01G10140	7.45	5.41	6.03	4.04	5.44	3.88	4.98	1.11	GO:0005515:protein binding|GO:0003735:structural constituent of ribosome|GO:0006412:translation
PM01G10150	2.57	2.95	4.32	5.51	6.5	6.93	10.39	7.19	GO:0005686:U2 snRNP|GO:0071004:U2-type prespliceosome|GO:0071013:catalytic step 2 spliceosome|GO:0000245:spliceosomal complex assembly
PM01G10160	0.03	0	0.03	0	0	3.27	0.08	0	GO:0009821:alkaloid biosynthetic process|GO:0009058:biosynthetic process|GO:0005783:endoplasmic reticulum|GO:0016788:hydrolase activity, acting on ester bonds|GO:0016020:membrane|GO:0005739:mitochondrion|GO:0009555:pollen development|GO:0010584:pollen exine formation|GO:0016844:strictosidine synthase activity|GO:0005773:vacuole
PM01G10170	44.46	34.22	49.62	51.29	44.85	51.03	31.41	22.72	GO:0005737:cytoplasm|GO:0006952:defense response|GO:0016874:ligase activity|GO:0005634:nucleus|GO:0043161:proteasome-mediated ubiquitin-dependent protein catabolic process|GO:0016567:protein ubiquitination|GO:0031347:regulation of defense response|GO:0043067:regulation of programmed cell death|GO:0004842:ubiquitin-protein transferase activity|GO:0008270:zinc ion binding
PM01G10180	15.89	11.66	7.75	10.41	17.05	20.37	10.28	6.56	GO:0005794:Golgi apparatus|GO:0070688:MLL5-L complex|GO:0006048:UDP-N-acetylglucosamine biosynthetic process|GO:0008375:acetylglucosaminyltransferase activity|GO:0006915:apoptotic process|GO:0008150:biological_process|GO:0015086:cadmium ion transmembrane transporter activity|GO:0005509:calcium ion binding|GO:0019829:cation-transporting ATPase activity|GO:0006464:cellular protein modification proc…
PM01G10190	12.34	26.74	10.24	10.49	10.79	15.5	10.13	10.62	GO:0005794:Golgi apparatus|GO:0046513:ceramide biosynthetic process|GO:0005783:endoplasmic reticulum|GO:0005789:endoplasmic reticulum membrane|GO:0016021:integral component of membrane|GO:0042759:long-chain fatty acid biosynthetic process|GO:0005886:plasma membrane|GO:0002238:response to molecule of fungal origin|GO:0050291:sphingosine N-acyltransferase activity
PM01G10200	10.35	17.84	8.94	26.1	10.43	32.65	9.83	27.49	GO:0046820:4-amino-4-deoxychorismate synthase activity|GO:0004049:anthranilate synthase activity|GO:0005950:anthranilate synthase complex|GO:0009073:aromatic amino acid family biosynthetic process|GO:0009507:chloroplast|GO:0006760:folic acid-containing compound metabolic process|GO:0000162:tryptophan biosynthetic process
PM01G10210	0.26	0.02	0	0.03	0.28	0.22	0	0.02
PM01G10220	1.99	2.11	5.01	5.39	3.47	3.98	4.1	2.04	GO:0016020:membrane|GO:0005634:nucleus|GO:0006813:potassium ion transport|GO:0051260:protein homooligomerization|GO:0016567:protein ubiquitination|GO:0005249:voltage-gated potassium channel activity|GO:0008076:voltage-gated potassium channel complex
PM01G10230	0.79	0.05	0	0.18	1.2	0.46	0.62	0.03	GO:0005524:ATP binding|GO:0031390:Ctf18 RFC-like complex|GO:0003677:DNA binding|GO:0003689:DNA clamp loader activity|GO:0006260:DNA replication|GO:0007049:cell cycle|GO:0005575:cellular_component|GO:0005737:cytoplasm|GO:0007140:male meiosis|GO:0016020:membrane|GO:0051985:negative regulation of chromosome segregation|GO:0005654:nucleoplasm|GO:0000166:nucleotide binding|GO:0005634:nucleus|GO:190026…
PM01G10240	21.27	18.84	27.52	22.64	18.75	9.79	17.29	2.97	GO:0008194:UDP-glycosyltransferase activity|GO:0046510:UDP-sulfoquinovose:DAG sulfoquinovosyltransferase activity|GO:0009058:biosynthetic process|GO:0016036:cellular response to phosphate starvation|GO:0005575:cellular_component|GO:0009507:chloroplast|GO:0009941:chloroplast envelope|GO:0031969:chloroplast membrane|GO:0005737:cytoplasm|GO:0009247:glycolipid biosynthetic process|GO:0040007:growth|G…
PM01G10250	26.01	14.83	13.52	27.07	26.7	79.97	38	27.01	GO:0043132:NAD transport|GO:0015297:antiporter activity|GO:0046861:glyoxysomal membrane|GO:0009514:glyoxysome|GO:0016021:integral component of membrane|GO:0005743:mitochondrial inner membrane|GO:0005739:mitochondrion|GO:0005778:peroxisomal membrane|GO:0005777:peroxisome|GO:0044375:regulation of peroxisome size|GO:0003735:structural constituent of ribosome|GO:0006412:translation|GO:0006810:transpo…
PM01G10260	13.84	17.5	26.69	16	12.24	12.08	1.6	5.11	GO:0003677:DNA binding|GO:0008150:biological_process|GO:0009507:chloroplast|GO:0005886:plasma membrane
PM01G10270	78.22	87.33	24.69	8.23	15.75	21.95	0.47	2.28	GO:0003723:RNA binding|GO:0009507:chloroplast|GO:0009570:chloroplast stroma|GO:0009535:chloroplast thylakoid membrane|GO:0022626:cytosolic ribosome|GO:0016020:membrane|GO:0005634:nucleus|GO:0000311:plastid large ribosomal subunit|GO:0009547:plastid ribosome|GO:0008266:poly(U) RNA binding|GO:0019843:rRNA binding|GO:0005840:ribosome|GO:0003735:structural constituent of ribosome|GO:0009579:thylakoid…
PM01G10280	12.48	9.91	23	25.82	24.94	31.78	19.83	16.98	GO:0019005:SCF ubiquitin ligase complex|GO:0031146:SCF-dependent proteasomal ubiquitin-dependent protein catabolic process|GO:0010011:auxin binding|GO:0009734:auxin-activated signaling pathway|GO:0071249:cellular response to nitrate|GO:0006952:defense response|GO:0042742:defense response to bacterium|GO:0050832:defense response to fungus|GO:0048589:developmental growth|GO:0000822:inositol hexakis…
PM01G10290	0.5	0.53	0.38	0.99	1.01	0.68	0.82	1.54
PM01G10300	66.01	11.64	21.36	13.57	20.68	14.98	58.69	35.97	GO:0003677:DNA binding|GO:0003723:RNA binding|GO:0008380:RNA splicing|GO:0060008:Sertoli cell differentiation|GO:0008150:biological_process|GO:0005575:cellular_component|GO:0005737:cytoplasm|GO:0070062:extracellular exosome|GO:0042802:identical protein binding|GO:0043231:intracellular membrane-bounded organelle|GO:0006397:mRNA processing|GO:0044351:macropinocytosis|GO:0016607:nuclear speck|GO:000…
PM01G10310	7.01	13	13.74	19.49	34.88	23.02	16.32	12.51
PM01G10320	14	5.39	5.48	6.2	5.95	7.98	11.85	1.99	GO:0008150:biological_process|GO:0005575:cellular_component|GO:0016021:integral component of membrane|GO:0044351:macropinocytosis|GO:0016020:membrane|GO:0005739:mitochondrion|GO:0003674:molecular_function
PM01G10330	0.35	0.22	0.18	1.01	1.66	1.62	0.71	0.69	GO:0015074:DNA integration|GO:0016442:RISC complex|GO:0003723:RNA binding|GO:0005575:cellular_component|GO:0005737:cytoplasm|GO:0005739:mitochondrion|GO:0003676:nucleic acid binding|GO:0005634:nucleus|GO:0030422:production of siRNA involved in RNA interference|GO:0004525:ribonuclease III activity|GO:0008270:zinc ion binding
PM01G10340	23.45	9.73	20.65	30.16	63.14	51.71	45.89	1.84	GO:0051015:actin filament binding|GO:0051017:actin filament bundle assembly|GO:0005575:cellular_component|GO:0005737:cytoplasm|GO:0005856:cytoskeleton|GO:0044351:macropinocytosis|GO:0046872:metal ion binding|GO:0005886:plasma membrane|GO:0005515:protein binding|GO:0003700:transcription factor activity, sequence-specific DNA binding|GO:0008270:zinc ion binding
PM01G10350	4.3	4.19	7.09	7.79	6.22	5.01	5.29	5.31	GO:0003677:DNA binding|GO:0051020:GTPase binding|GO:0031430:M band|GO:0061621:canonical glycolysis|GO:0015976:carbon utilization|GO:0009986:cell surface|GO:0071216:cellular response to biotic stimulus|GO:0005737:cytoplasm|GO:0005829:cytosol|GO:0044409:entry into host|GO:0070062:extracellular exosome|GO:0005576:extracellular region|GO:0005615:extracellular space|GO:0019897:extrinsic component of p…
PM01G10360	217.33	25.03	63.28	29.99	66.84	91.48	43.84	213.09	GO:0005737:cytoplasm|GO:0010286:heat acclimation|GO:0005515:protein binding|GO:0051259:protein oligomerization|GO:0046685:response to arsenic-containing substance|GO:0046686:response to cadmium ion|GO:0046688:response to copper ion|GO:0045471:response to ethanol|GO:0009408:response to heat|GO:0009644:response to high light intensity|GO:0042542:response to hydrogen peroxide
PM01G10370	9.41	8.91	11.57	7.92	7.02	7.26	6.83	5.15	GO:0016303:1-phosphatidylinositol-3-kinase activity|GO:0035005:1-phosphatidylinositol-4-phosphate 3-kinase activity|GO:0005086:ARF guanyl-nucleotide exchange factor activity|GO:0003677:DNA binding|GO:0005794:Golgi apparatus|GO:0005089:Rho guanyl-nucleotide exchange factor activity|GO:0000421:autophagosome membrane|GO:0008150:biological_process|GO:0030276:clathrin binding|GO:0030136:clathrin-coate…
PM01G10380	16.93	11.83	6.13	11.54	45.93	54.66	9.2	9.57	GO:0005524:ATP binding|GO:0070370:cellular heat acclimation|GO:0030244:cellulose biosynthetic process|GO:0042742:defense response to bacterium|GO:0050832:defense response to fungus|GO:0009553:embryo sac development|GO:0005576:extracellular region|GO:0048281:inflorescence morphogenesis|GO:0016021:integral component of membrane|GO:0016301:kinase activity|GO:0009965:leaf morphogenesis|GO:0005739:mit…
PM01G10390	4.48	0.67	0.45	0.38	1.2	1.84	9.71	73.7	GO:0005737:cytoplasm|GO:0010286:heat acclimation|GO:0005515:protein binding|GO:0051259:protein oligomerization|GO:0046685:response to arsenic-containing substance|GO:0046686:response to cadmium ion|GO:0046688:response to copper ion|GO:0045471:response to ethanol|GO:0009408:response to heat|GO:0009644:response to high light intensity|GO:0042542:response to hydrogen peroxide
PM01G10400	24.1	15.51	26.63	27.5	22.96	27.35	33.49	71.04	GO:0006281:DNA repair|GO:0005737:cytoplasm|GO:0016574:histone ubiquitination|GO:0043161:proteasome-mediated ubiquitin-dependent protein catabolic process|GO:0000209:protein polyubiquitination|GO:0061630:ubiquitin protein ligase activity|GO:0031625:ubiquitin protein ligase binding
PM01G10410	26.74	13.66	32.02	27.32	30.02	25.94	23.69	60.79	GO:0008150:biological_process|GO:0005737:cytoplasm|GO:0003674:molecular_function|GO:0008479:queuine tRNA-ribosyltransferase activity|GO:0008616:queuosine biosynthetic process
PM01G10420	10.14	0.45	1.56	0.09	0.47	1.63	5.59	12.21	GO:0005737:cytoplasm|GO:0010286:heat acclimation|GO:0005515:protein binding|GO:0051259:protein oligomerization|GO:0046685:response to arsenic-containing substance|GO:0046686:response to cadmium ion|GO:0046688:response to copper ion|GO:0045471:response to ethanol|GO:0009408:response to heat|GO:0009644:response to high light intensity|GO:0042542:response to hydrogen peroxide
PM01G10430	271.57	199.09	99.65	56.24	13.89	80.88	0.25	0.27	GO:0016208:AMP binding|GO:0048046:apoplast|GO:0005975:carbohydrate metabolic process|GO:0015976:carbon utilization|GO:0003824:catalytic activity|GO:0030054:cell junction|GO:0035690:cellular response to drug|GO:0042149:cellular response to glucose starvation|GO:0071286:cellular response to magnesium ion|GO:0009507:chloroplast|GO:0009570:chloroplast stroma|GO:0005737:cytoplasm|GO:0005829:cytosol|GO…
PM01G10440	10.63	14.57	0.22	1.75	5.18	11.7	12.58	0.08	GO:0008150:biological_process|GO:0005739:mitochondrion|GO:0003674:molecular_function|GO:0005634:nucleus|GO:0005886:plasma membrane|GO:0080167:response to karrikin
PM01G10450	10.22	13.74	5.4	7.51	20.11	19.32	10.57	5.2	GO:0008150:biological_process|GO:0009941:chloroplast envelope|GO:0005739:mitochondrion|GO:0003674:molecular_function|GO:0005634:nucleus|GO:0005886:plasma membrane|GO:0009506:plasmodesma|GO:0005773:vacuole
PM01G10460	8.01	5.17	14.06	13.1	11.13	9.99	13.99	27.94	GO:0003735:structural constituent of ribosome|GO:0006412:translation
PM01G10470	4.35	6.07	2.68	2.99	8.11	3.16	5.83	0.28	GO:0043531:ADP binding|GO:0005524:ATP binding|GO:0005737:cytoplasm|GO:0006952:defense response|GO:0046621:negative regulation of organ growth|GO:0005634:nucleus|GO:0010088:phloem development|GO:0048482:plant ovule morphogenesis|GO:0005886:plasma membrane|GO:0009409:response to cold|GO:0048364:root development|GO:0048317:seed morphogenesis|GO:0007165:signal transduction|GO:0043130:ubiquitin bindin…
PM01G10480	19.8	25.1	47.46	39.54	25	19.13	16.29	20.18	GO:1990316:ATG1/ULK1 kinase complex|GO:0005524:ATP binding|GO:0051879:Hsp90 protein binding|GO:0017137:Rab GTPase binding|GO:0007265:Ras protein signal transduction|GO:0048102:autophagic cell death|GO:0005776:autophagosome|GO:0000045:autophagosome assembly|GO:0006914:autophagy|GO:0048675:axon extension|GO:0007409:axonogenesis|GO:0034198:cellular response to amino acid starvation|GO:0006995:cellul…
PM01G10490	13.48	4.59	8.45	7.52	8.43	5.31	7.25	3.85
PM01G10500	18.21	23.77	0.08	0.79	2.39	3.4	3.38	1.1	GO:0005794:Golgi apparatus|GO:0009738:abscisic acid-activated signaling pathway|GO:0005509:calcium ion binding|GO:0009658:chloroplast organization|GO:0033106:cis-Golgi network membrane|GO:0005737:cytoplasm|GO:0005829:cytosol|GO:0042742:defense response to bacterium|GO:0044419:interspecies interaction between organisms|GO:0010150:leaf senescence|GO:0046872:metal ion binding|GO:0009788:negative reg…
PM01G10510	30.63	14.38	17.36	17.39	23.91	26.19	61.34	22.81	GO:0007568:aging|GO:0004022:alcohol dehydrogenase (NAD) activity|GO:0005575:cellular_component|GO:0009507:chloroplast|GO:0005829:cytosol|GO:0002213:defense response to insect|GO:0005576:extracellular region|GO:0055114:oxidation-reduction process|GO:0016491:oxidoreductase activity|GO:0046686:response to cadmium ion|GO:0080167:response to karrikin
PM01G10520	0	0	0	0.01	0	0	0.04	0.09	GO:0016929:SUMO-specific protease activity|GO:0005737:cytoplasm|GO:0004175:endopeptidase activity|GO:0005634:nucleus|GO:0016926:protein desumoylation|GO:0009966:regulation of signal transduction|GO:0004842:ubiquitin-protein transferase activity
PM01G10530	0.91	0.55	0.08	0.05	0.04	0.05	0.27	0.34	GO:0005524:ATP binding|GO:0009738:abscisic acid-activated signaling pathway|GO:0019722:calcium-mediated signaling|GO:0032502:developmental process|GO:0016021:integral component of membrane|GO:0005887:integral component of plasma membrane|GO:0016301:kinase activity|GO:0016020:membrane|GO:0016310:phosphorylation|GO:0005886:plasma membrane|GO:0046777:protein autophosphorylation|GO:0004672:protein ki…
PM01G10540	0.73	0.47	0	0	0.43	0.38	0	0.37
PM01G10550	0.65	0.28	0	0	0.28	0.46	0	0.34	GO:0005794:Golgi apparatus|GO:0008150:biological_process|GO:0005783:endoplasmic reticulum|GO:0005576:extracellular region|GO:0016021:integral component of membrane|GO:0005634:nucleus|GO:0005886:plasma membrane|GO:0016740:transferase activity|GO:0016757:transferase activity, transferring glycosyl groups
PM01G10560	11.51	10.94	3.32	2.66	6.75	2.42	2.86	11.16	GO:0005794:Golgi apparatus|GO:0008150:biological_process|GO:0005783:endoplasmic reticulum|GO:0005576:extracellular region|GO:0016021:integral component of membrane|GO:0005634:nucleus|GO:0005886:plasma membrane|GO:0016740:transferase activity|GO:0016757:transferase activity, transferring glycosyl groups
PM01G10570	8.29	1.66	0.31	1.04	2.04	0.49	11.01	2.55	GO:0003680:AT DNA binding|GO:0003677:DNA binding|GO:0048653:anther development|GO:0048440:carpel development|GO:0031490:chromatin DNA binding|GO:0005737:cytoplasm|GO:0042742:defense response to bacterium|GO:0050832:defense response to fungus|GO:0009908:flower development|GO:0042826:histone deacetylase binding|GO:0045087:innate immune response|GO:1900425:negative regulation of defense response to …
PM01G10580	15.05	19.91	31.26	32.71	32.03	26.14	18.41	67.61	GO:0003677:DNA binding|GO:0003723:RNA binding|GO:0006405:RNA export from nucleus|GO:0008380:RNA splicing|GO:0000375:RNA splicing, via transesterification reactions|GO:0008150:biological_process|GO:0071013:catalytic step 2 spliceosome|GO:0005575:cellular_component|GO:0005829:cytosol|GO:0031124:mRNA 3'-end processing|GO:0006406:mRNA export from nucleus|GO:0006397:mRNA processing|GO:0000398:mRNA spl…
PM01G10590	0.51	0	0	0	0.07	0.34	6.67	0.02	GO:0016132:brassinosteroid biosynthetic process|GO:0010268:brassinosteroid homeostasis|GO:0005783:endoplasmic reticulum|GO:0051777:ent-kaurenoate oxidase activity|GO:0009686:gibberellin biosynthetic process|GO:0009685:gibberellin metabolic process|GO:0007275:multicellular organism development|GO:0016125:sterol metabolic process
PM01G10600	3.57	16.16	1.01	0.87	1.3	0.62	3.55	0.13	GO:0008150:biological_process|GO:0009507:chloroplast|GO:0005739:mitochondrion|GO:0003674:molecular_function|GO:0005634:nucleus|GO:0005886:plasma membrane
PM01G10610	5.27	14.17	5.56	2.83	0.59	0.32	0.11	0	GO:0007165:signal transduction
PM01G10620	7.43	10.07	2.87	1.61	0.61	1.41	3.08	0	GO:0016020:membrane|GO:0007165:signal transduction
PM01G10630	0.53	0.16	0.13	0.01	0	2	0.14	0.1
PM01G10640	22	33.38	23.59	7.93	2.81	6.57	0.01	0.01	GO:0003677:DNA binding|GO:0003899:DNA-directed RNA polymerase activity|GO:0006352:DNA-templated transcription, initiation|GO:0043175:RNA polymerase core enzyme binding|GO:0071483:cellular response to blue light|GO:0071482:cellular response to light stimulus|GO:0009507:chloroplast|GO:0009658:chloroplast organization|GO:0005829:cytosol|GO:0040007:growth|GO:0005634:nucleus|GO:0019685:photosynthesis,…
PM01G10650	6.58	10.09	5.44	7.56	17.5	11.63	8.49	20.05	GO:0015450:P-P-bond-hydrolysis-driven protein transmembrane transporter activity|GO:0010006:Toc complex|GO:0015267:channel activity|GO:0009507:chloroplast|GO:0009941:chloroplast envelope|GO:0009658:chloroplast organization|GO:0009707:chloroplast outer membrane|GO:0009793:embryo development ending in seed dormancy|GO:0048598:embryonic morphogenesis|GO:0009662:etioplast organization|GO:0031359:inte…
PM01G10660	0	0.03	0.05	0.04	0.01	0.01	0	0.1	GO:0009451:RNA modification|GO:0008150:biological_process|GO:0005575:cellular_component|GO:0009507:chloroplast|GO:0080156:mitochondrial mRNA modification|GO:0005739:mitochondrion|GO:0003674:molecular_function|GO:0010182:sugar mediated signaling pathway|GO:0008270:zinc ion binding
PM01G10670	0.57	0.18	20.45	14.74	11.05	8.73	3.21	44.1	GO:0030544:Hsp70 protein binding|GO:0009507:chloroplast|GO:0005737:cytoplasm|GO:0002181:cytoplasmic translation|GO:0022626:cytosolic ribosome|GO:0005783:endoplasmic reticulum|GO:0004857:enzyme inhibitor activity|GO:0016021:integral component of membrane|GO:0005634:nucleus|GO:0009408:response to heat|GO:0009651:response to salt stress
PM01G10680	20.25	13.76	9.53	11.82	11.38	6.58	26.28	10.34	GO:0043161:proteasome-mediated ubiquitin-dependent protein catabolic process|GO:0000209:protein polyubiquitination|GO:0042787:protein ubiquitination involved in ubiquitin-dependent protein catabolic process|GO:0061630:ubiquitin protein ligase activity
PM01G10690	1.87	1.74	0.04	0.08	0.83	0.06	0.3	0	GO:0004190:aspartic-type endopeptidase activity|GO:0030163:protein catabolic process|GO:0006508:proteolysis
PM01G10700	2.87	1.15	4.81	6.9	7.96	4.71	2.64	11.25
PM01G10710	5.49	4.54	12.71	18.83	18.57	13.52	19.05	21.51	GO:0003723:RNA binding|GO:0005739:mitochondrion|GO:0005634:nucleus|GO:0004809:tRNA (guanine-N2-)-methyltransferase activity|GO:0002940:tRNA N2-guanine methylation|GO:0000049:tRNA binding|GO:0008033:tRNA processing
PM01G10720	15.32	7.02	1.88	8.94	14.95	1.99	8.16	0.79	GO:0005575:cellular_component|GO:0005739:mitochondrion|GO:0003674:molecular_function|GO:0005634:nucleus|GO:0005886:plasma membrane|GO:0042127:regulation of cell proliferation|GO:0048367:shoot system development
PM01G10730	14.27	27.11	0.51	8.97	12.36	42.93	7.22	0.39	GO:0005507:copper ion binding|GO:0009809:lignin biosynthetic process|GO:0016722:oxidoreductase activity, oxidizing metal ions
PM01G10740	67.78	63.43	19.15	61.59	55.13	128.87	109.6	1.6	GO:0008253:5'-nucleotidase activity|GO:0005575:cellular_component|GO:0005737:cytoplasm|GO:0005829:cytosol|GO:0016787:hydrolase activity|GO:0008152:metabolic process|GO:0008252:nucleotidase activity|GO:0005634:nucleus|GO:0006206:pyrimidine nucleobase metabolic process|GO:0047405:pyrimidine-5'-nucleotide nucleosidase activity
PM01G10750	0.03	0.05	0.07	0.08	0.01	0	0.28	1.06
PM01G10760	7.46	8.33	14.69	18.39	16.84	16.68	10.65	49.62	GO:0005634:nucleus|GO:0006355:regulation of transcription, DNA-templated|GO:0043565:sequence-specific DNA binding|GO:0003700:transcription factor activity, sequence-specific DNA binding
PM01G10770	2.7	2.06	1.32	24.73	15.88	1.53	7.2	45.08
PM01G10780	45.71	78.06	83.86	87.84	55.62	67.8	70.8	61.71	GO:0005545:1-phosphatidylinositol binding|GO:0005794:Golgi apparatus|GO:0008150:biological_process|GO:0005575:cellular_component|GO:0005737:cytoplasm|GO:0005829:cytosol|GO:0009567:double fertilization forming a zygote and endosperm|GO:0006897:endocytosis|GO:0005783:endoplasmic reticulum|GO:0006887:exocytosis|GO:0008289:lipid binding|GO:0006869:lipid transport|GO:0044351:macropinocytosis|GO:001602…
PM01G10790	33.11	39.76	13.95	16.86	15.81	31.49	46.06	15.35	GO:0003691:double-stranded telomeric DNA binding|GO:0000783:nuclear telomere cap complex|GO:0031627:telomeric loop formation
PM01G10800	10.64	10.87	15.83	16.05	13.16	13.91	11.67	20.74	GO:0008150:biological_process|GO:0003674:molecular_function|GO:0005634:nucleus
PM01G10810	21.2	24.73	39.71	54.04	34.26	25.87	28.62	45.29	GO:0005524:ATP binding|GO:0009507:chloroplast|GO:0005737:cytoplasm|GO:0050832:defense response to fungus|GO:0016021:integral component of membrane|GO:0016301:kinase activity|GO:0005730:nucleolus|GO:0005634:nucleus|GO:0052033:pathogen-associated molecular pattern dependent induction by symbiont of host innate immune response|GO:0016310:phosphorylation|GO:0005886:plasma membrane|GO:0046777:protein …
PM01G10820	0.15	0.04	0.05	0.05	0.23	0.08	2.78	0.05	GO:0048366:leaf development|GO:0010074:maintenance of meristem identity|GO:0009933:meristem structural organization|GO:0046872:metal ion binding|GO:0007275:multicellular organism development|GO:0005634:nucleus|GO:0005543:phospholipid binding|GO:0005886:plasma membrane|GO:0006470:protein dephosphorylation|GO:0004722:protein serine/threonine phosphatase activity|GO:0009934:regulation of meristem st…
PM01G10830	9.01	6.13	1.2	2.51	7.94	5.2	3	0.09	GO:0048208:COPII vesicle coating|GO:0000139:Golgi membrane|GO:0008150:biological_process|GO:0005575:cellular_component|GO:0005737:cytoplasm|GO:0008093:cytoskeletal adaptor activity|GO:0005829:cytosol|GO:0042742:defense response to bacterium|GO:0016021:integral component of membrane|GO:0005622:intracellular|GO:0035556:intracellular signal transduction|GO:0016301:kinase activity|GO:0010311:lateral …
PM01G10840	7.78	7.1	7.2	5.07	9.6	5.81	7.21	5	GO:0005794:Golgi apparatus|GO:0034613:cellular protein localization|GO:0005783:endoplasmic reticulum|GO:0031211:endoplasmic reticulum palmitoyltransferase complex|GO:0030176:integral component of endoplasmic reticulum membrane|GO:0016021:integral component of membrane|GO:0016020:membrane|GO:0046872:metal ion binding|GO:0005730:nucleolus|GO:0005654:nucleoplasm|GO:0016409:palmitoyltransferase activ…
PM01G10850	36.22	49.05	28.37	50.33	66.06	50.07	51.21	20.94	GO:0005545:1-phosphatidylinositol binding|GO:0005794:Golgi apparatus|GO:0030276:clathrin binding|GO:0048268:clathrin coat assembly|GO:0030136:clathrin-coated vesicle|GO:0005905:coated pit|GO:0005829:cytosol|GO:0006897:endocytosis|GO:0016020:membrane|GO:0005634:nucleus|GO:0005886:plasma membrane|GO:0005515:protein binding|GO:0015031:protein transport
PM01G10860	4.08	2.08	1.87	2.18	3.27	1.87	7.73	0.74
PM01G10870	10.61	15.24	18.15	21.46	13.85	14.4	10.52	16.93	GO:0005737:cytoplasm|GO:0005634:nucleus
PM01G10880	2.2	1.06	2.36	2.77	3.69	1.83	3.53	0.01	GO:0003677:DNA binding|GO:0010052:guard cell differentiation|GO:0046872:metal ion binding|GO:0005730:nucleolus|GO:0005634:nucleus|GO:0045893:positive regulation of transcription, DNA-templated|GO:0003002:regionalization|GO:1902066:regulation of cell wall pectin metabolic process|GO:0010439:regulation of glucosinolate biosynthetic process|GO:0006355:regulation of transcription, DNA-templated|GO:00…
PM01G10890	1.28	0.37	0.68	0.18	0.26	0.42	1.22	0.35	GO:0005524:ATP binding|GO:0005794:Golgi apparatus|GO:0048046:apoplast|GO:0001568:blood vessel development|GO:0005618:cell wall|GO:0009507:chloroplast|GO:0009941:chloroplast envelope|GO:0005737:cytoplasm|GO:0005829:cytosol|GO:0022626:cytosolic ribosome|GO:0042742:defense response to bacterium|GO:0050832:defense response to fungus|GO:0098542:defense response to other organism|GO:0060216:definitive …
PM01G10900	9.49	9.72	14.75	15.03	17.77	15.62	19.77	10.55	GO:0010181:FMN binding|GO:0005634:nucleus|GO:0055114:oxidation-reduction process|GO:0016491:oxidoreductase activity
PM01G10910	0	0.07	0.03	0	0.01	0.08	0.09	0.02	GO:0005524:ATP binding|GO:0046034:ATP metabolic process|GO:0042623:ATPase activity, coupled|GO:0055131:C3HC4-type RING finger domain binding|GO:0001664:G-protein coupled receptor binding|GO:0005794:Golgi apparatus|GO:0023026:MHC class II protein complex binding|GO:0000974:Prp19 complex|GO:0048046:apoplast|GO:0072562:blood microparticle|GO:0005623:cell|GO:0005618:cell wall|GO:0051085:chaperone med…
PM01G10920	0.04	0	0	0	0	0.03	0	0.01	GO:0004190:aspartic-type endopeptidase activity|GO:0030163:protein catabolic process|GO:0006508:proteolysis
PM01G10930	4.26	16.26	27.99	25.79	22.12	28.44	18.01	7.91	GO:0005524:ATP binding|GO:0005794:Golgi apparatus|GO:0000974:Prp19 complex|GO:0048046:apoplast|GO:0005623:cell|GO:0005618:cell wall|GO:0009507:chloroplast|GO:0009941:chloroplast envelope|GO:0005737:cytoplasm|GO:0005829:cytosol|GO:0022626:cytosolic ribosome|GO:0042742:defense response to bacterium|GO:0050832:defense response to fungus|GO:0098542:defense response to other organism|GO:0030529:intrac…
PM01G10940	3.51	8.91	19.51	16.75	15.06	17.04	6.19	4.92	GO:0005524:ATP binding|GO:0046034:ATP metabolic process|GO:0042623:ATPase activity, coupled|GO:0055131:C3HC4-type RING finger domain binding|GO:0006281:DNA repair|GO:0001664:G-protein coupled receptor binding|GO:0005794:Golgi apparatus|GO:0048046:apoplast|GO:0072562:blood microparticle|GO:0001568:blood vessel development|GO:0048593:camera-type eye morphogenesis|GO:0005618:cell wall|GO:0070370:cel…
PM01G10950	0.05	0.05	0	0.06	0.03	0.57	0.32	0.02	GO:0005524:ATP binding|GO:0005794:Golgi apparatus|GO:0006616:SRP-dependent cotranslational protein targeting to membrane, translocation|GO:0048046:apoplast|GO:0009986:cell surface|GO:0005618:cell wall|GO:0005832:chaperonin-containing T-complex|GO:0009507:chloroplast|GO:0009941:chloroplast envelope|GO:0005737:cytoplasm|GO:0005829:cytosol|GO:0022626:cytosolic ribosome|GO:0042742:defense response to…
PM01G10960	0.11	0.04	0.02	0.06	0.05	0.75	0	0.07	GO:0005524:ATP binding|GO:0005794:Golgi apparatus|GO:0048046:apoplast|GO:0005618:cell wall|GO:0009507:chloroplast|GO:0009941:chloroplast envelope|GO:0005737:cytoplasm|GO:0005829:cytosol|GO:0022626:cytosolic ribosome|GO:0042742:defense response to bacterium|GO:0050832:defense response to fungus|GO:0098542:defense response to other organism|GO:0016020:membrane|GO:0005739:mitochondrion|GO:0010187:ne…
PM01G10970	11.62	12.53	4.58	5.55	11.9	9.63	11.82	17.63	GO:0005794:Golgi apparatus|GO:0000139:Golgi membrane|GO:0008375:acetylglucosaminyltransferase activity|GO:0016051:carbohydrate biosynthetic process|GO:0016049:cell growth|GO:0009567:double fertilization forming a zygote and endosperm|GO:0015020:glucuronosyltransferase activity|GO:0016021:integral component of membrane|GO:0016020:membrane|GO:0005634:nucleus|GO:0005886:plasma membrane|GO:0048868:po…
PM01G10980	2.46	0.41	1.26	1.29	4.59	5.26	0.12	161.29	GO:0008150:biological_process|GO:0005575:cellular_component|GO:0009507:chloroplast|GO:0032502:developmental process|GO:0016021:integral component of membrane|GO:0005739:mitochondrion|GO:0003674:molecular_function|GO:0005634:nucleus
PM01G10990	7.73	37.16	17.86	22.1	20.6	18.42	17.68	6.98	GO:0005524:ATP binding|GO:0042626:ATPase activity, coupled to transmembrane movement of substances|GO:0010541:acropetal auxin transport|GO:0043481:anthocyanin accumulation in tissues in response to UV light|GO:0010315:auxin efflux|GO:0010329:auxin efflux transmembrane transporter activity|GO:0010328:auxin influx transmembrane transporter activity|GO:0009926:auxin polar transport|GO:0009734:auxin-…
PM01G11000	80.22	66.62	45.45	29.57	22.02	27.46	16.46	32.69	GO:0000139:Golgi membrane|GO:0008766:UDP-N-acetylmuramoylalanyl-D-glutamyl-2,6-diaminopimelate-D-alanyl-D-alanine ligase activity|GO:0005509:calcium ion binding|GO:0009507:chloroplast|GO:0030095:chloroplast photosystem II|GO:0009543:chloroplast thylakoid lumen|GO:0009535:chloroplast thylakoid membrane|GO:0043773:coenzyme F420-0 gamma-glutamyl ligase activity|GO:0043774:coenzyme F420-2 alpha-gluta…
PM01G11010	0	0	0	0.01	0.03	0	0.07	0
PM01G11020	1.73	0.26	0.01	0.32	2.84	1.04	1	0.01	GO:0005524:ATP binding|GO:0008574:ATP-dependent microtubule motor activity, plus-end-directed|GO:0005871:kinesin complex|GO:0005874:microtubule|GO:0008017:microtubule binding|GO:0003777:microtubule motor activity|GO:0007018:microtubule-based movement|GO:0005634:nucleus
PM01G11030	5.71	0.81	1.74	0.24	0.05	0.24	77.04	0.16	GO:0005634:nucleus|GO:0010200:response to chitin|GO:0043565:sequence-specific DNA binding|GO:0003700:transcription factor activity, sequence-specific DNA binding|GO:0044212:transcription regulatory region DNA binding
PM01G11040	7.36	2.64	24.06	21.42	15.17	15.02	11.74	12.55	GO:0008150:biological_process|GO:0005575:cellular_component|GO:0003674:molecular_function
PM01G11050	0.06	0.01	0.03	0.59	0.04	0.05	0.22	0.25	GO:0001046:core promoter sequence-specific DNA binding|GO:0005634:nucleus|GO:0006366:transcription from RNA polymerase II promoter|GO:0001228:transcriptional activator activity, RNA polymerase II transcription regulatory region sequence-specific binding
PM01G11060	9.52	9.45	1.62	9.4	9.55	12.11	24.55	8.61	GO:0004042:acetyl-CoA:L-glutamate N-acetyltransferase activity|GO:0006526:arginine biosynthetic process|GO:0009507:chloroplast|GO:0009570:chloroplast stroma|GO:0004358:glutamate N-acetyltransferase activity|GO:0005739:mitochondrion|GO:0006592:ornithine biosynthetic process
PM01G11070	315.05	10.67	3.2	19.17	156.6	73.69	132.36	3.31	GO:0003677:DNA binding|GO:0006342:chromatin silencing|GO:0000790:nuclear chromatin
PM01G11080	14.98	5.26	8.9	7.09	10.08	8.71	5.52	7.32	GO:0005524:ATP binding|GO:0005794:Golgi apparatus|GO:0070274:RES complex|GO:0003723:RNA binding|GO:0005686:U2 snRNP|GO:0008150:biological_process|GO:0005575:cellular_component|GO:0009507:chloroplast|GO:0009631:cold acclimation|GO:0005507:copper ion binding|GO:0003690:double-stranded DNA binding|GO:0000384:first spliceosomal transesterification activity|GO:0000349:generation of catalytic spliceoso…
PM01G11090	475.15	373.19	308.51	112.53	37.86	78.85	10.03	5.36	GO:0015986:ATP synthesis coupled proton transport|GO:0009507:chloroplast|GO:0009941:chloroplast envelope|GO:0009534:chloroplast thylakoid|GO:0009535:chloroplast thylakoid membrane|GO:0042742:defense response to bacterium|GO:0015078:hydrogen ion transmembrane transporter activity|GO:0016787:hydrolase activity|GO:0016021:integral component of membrane|GO:0016020:membrane|GO:0045264:plasma membrane …
PM01G11100	10.71	6.43	6.54	10.89	10.28	9.78	14.75	25.3	GO:0005524:ATP binding|GO:0005794:Golgi apparatus|GO:0003723:RNA binding|GO:0000380:alternative mRNA splicing, via spliceosome|GO:0048046:apoplast|GO:0008150:biological_process|GO:0005618:cell wall|GO:0009507:chloroplast|GO:1900871:chloroplast mRNA modification|GO:0009631:cold acclimation|GO:0005507:copper ion binding|GO:0005829:cytosol|GO:0003690:double-stranded DNA binding|GO:0005768:endosome|G…
PM01G11110	1.17	1.77	4.23	4.94	3.18	2.75	3.85	2.31	GO:0003677:DNA binding|GO:0008150:biological_process|GO:0003674:molecular_function|GO:0005634:nucleus|GO:0006355:regulation of transcription, DNA-templated|GO:0016746:transferase activity, transferring acyl groups|GO:0008270:zinc ion binding
PM01G11120	0	0	0	0.41	0.02	0.01	0.03	0
PM01G11130	4.97	3.29	1.22	1.65	5.52	11.32	3.38	12.07	GO:0003779:actin binding|GO:0015629:actin cytoskeleton|GO:0005884:actin filament|GO:0030042:actin filament depolymerization|GO:0007015:actin filament organization|GO:0030041:actin filament polymerization|GO:0048046:apoplast|GO:0009507:chloroplast|GO:0005737:cytoplasm|GO:0005829:cytosol|GO:0009870:defense response signaling pathway, resistance gene-dependent|GO:0042742:defense response to bacteriu…
PM01G11140	0	0.02	0.08	0.05	0.01	20.84	0.03	3.56	GO:0003723:RNA binding|GO:0008380:RNA splicing|GO:0071013:catalytic step 2 spliceosome|GO:0005737:cytoplasm|GO:0036464:cytoplasmic ribonucleoprotein granule|GO:0010494:cytoplasmic stress granule|GO:0005829:cytosol|GO:0030425:dendrite|GO:0070062:extracellular exosome|GO:0005925:focal adhesion|GO:0031047:gene silencing by RNA|GO:0030529:intracellular ribonucleoprotein complex|GO:0003729:mRNA bindin…
PM01G11150	56.99	75.37	63.57	76.53	82.51	62.67	36.34	41.55	GO:0003677:DNA binding|GO:0006888:ER to Golgi vesicle-mediated transport|GO:0005096:GTPase activator activity|GO:0005794:Golgi apparatus|GO:0000139:Golgi membrane|GO:0043001:Golgi to plasma membrane protein transport|GO:0036498:IRE1-mediated unfolded protein response|GO:0003779:actin binding|GO:0030037:actin filament reorganization involved in cell cycle|GO:0005737:cytoplasm|GO:0005856:cytoskelet…
PM01G11160	59.15	33.3	55.51	63.49	64.88	33.75	27.84	22.91	GO:0003723:RNA binding|GO:0006405:RNA export from nucleus|GO:0008380:RNA splicing|GO:0071013:catalytic step 2 spliceosome|GO:0005575:cellular_component|GO:0005737:cytoplasm|GO:0005829:cytosol|GO:0035145:exon-exon junction complex|GO:0070062:extracellular exosome|GO:0043231:intracellular membrane-bounded organelle|GO:0031124:mRNA 3'-end processing|GO:0003729:mRNA binding|GO:0006406:mRNA export fro…
PM01G11170	25.56	50.49	10.91	19.68	55.66	30.94	26.92	14.73	GO:0010489:UDP-4-keto-6-deoxy-glucose-3,5-epimerase activity|GO:0010490:UDP-4-keto-rhamnose-4-keto-reductase activity|GO:0010280:UDP-L-rhamnose synthase activity|GO:0050377:UDP-glucose 4,6-dehydratase activity|GO:0010253:UDP-rhamnose biosynthetic process|GO:0048046:apoplast|GO:0010315:auxin efflux|GO:0008150:biological_process|GO:0003824:catalytic activity|GO:0030154:cell differentiation|GO:00715…
PM01G11180	119.28	148.63	27.28	68.71	432.02	335.46	108.08	9.56	GO:0042732:D-xylose metabolic process|GO:0005794:Golgi apparatus|GO:0032580:Golgi cisterna membrane|GO:0000139:Golgi membrane|GO:0070403:NAD+ binding|GO:0033320:UDP-D-xylose biosynthetic process|GO:0048040:UDP-glucuronate decarboxylase activity|GO:0003824:catalytic activity|GO:0005737:cytoplasm|GO:0005829:cytosol|GO:0008460:dTDP-glucose 4,6-dehydratase activity|GO:0019305:dTDP-rhamnose biosynthet…
PM01G11190	2.17	0.48	0.01	0.1	0.1	0.27	0	0	GO:0005618:cell wall|GO:0006952:defense response|GO:0005576:extracellular region|GO:0003674:molecular_function|GO:0005886:plasma membrane|GO:0009506:plasmodesma|GO:0006468:protein phosphorylation|GO:0004674:protein serine/threonine kinase activity|GO:0009737:response to abscisic acid|GO:0080167:response to karrikin|GO:0005773:vacuole
PM01G11200	0	0	0	0	0	0	0	0	GO:0005528:FK506 binding|GO:0061077:chaperone-mediated protein folding|GO:0005789:endoplasmic reticulum membrane|GO:0003755:peptidyl-prolyl cis-trans isomerase activity
PM01G11210	2.72	0.12	0.04	0.47	0.17	0.13	1.67	241.06	GO:0005524:ATP binding|GO:0046034:ATP metabolic process|GO:0042623:ATPase activity, coupled|GO:0055131:C3HC4-type RING finger domain binding|GO:0001664:G-protein coupled receptor binding|GO:0005794:Golgi apparatus|GO:0023026:MHC class II protein complex binding|GO:0000974:Prp19 complex|GO:0048046:apoplast|GO:0072562:blood microparticle|GO:0005623:cell|GO:0005618:cell wall|GO:0051085:chaperone med…
PM01G11220	18.67	16.24	24.65	41.18	25.42	22.09	40.81	6.59	GO:0005575:cellular_component|GO:0009941:chloroplast envelope|GO:0042538:hyperosmotic salinity response|GO:0005739:mitochondrion|GO:0003674:molecular_function
PM01G11230	0.12	0	0	0.15	0	0	12.62	0
PM01G11240	0.01	0.02	0.34	0.07	0.01	0	0.02	0.51	GO:0034768:(E)-beta-ocimene synthase activity|GO:0052578:alpha-farnesene synthase activity|GO:0071482:cellular response to light stimulus|GO:0009507:chloroplast|GO:0009570:chloroplast stroma|GO:0005829:cytosol|GO:0016787:hydrolase activity|GO:0000287:magnesium ion binding|GO:0030145:manganese ion binding|GO:0008152:metabolic process|GO:0043693:monoterpene biosynthetic process|GO:0050551:myrcene s…
PM01G11250	8.25	20.24	11.1	7.27	4.67	9.67	9.57	0.56	GO:0008150:biological_process|GO:0005575:cellular_component|GO:0006952:defense response|GO:0016021:integral component of membrane|GO:0003674:molecular_function|GO:0005886:plasma membrane|GO:0009506:plasmodesma|GO:0006468:protein phosphorylation|GO:0004674:protein serine/threonine kinase activity
PM01G11260	4.95	10.16	14.82	13.56	9.35	20.42	10.13	22.21	GO:0008150:biological_process|GO:0016020:membrane|GO:0003674:molecular_function|GO:0005634:nucleus|GO:0005886:plasma membrane
PM01G11270	2.42	0.07	0.04	0	0.01	0.11	15.75	0.06	GO:0042349:guiding stereospecific synthesis activity|GO:0009699:phenylpropanoid biosynthetic process
PM01G11280	1.3	2.24	1.3	3.02	3.13	6.87	2.44	4.81	GO:0042732:D-xylose metabolic process|GO:0005794:Golgi apparatus|GO:0032580:Golgi cisterna membrane|GO:0000139:Golgi membrane|GO:0070403:NAD+ binding|GO:0033320:UDP-D-xylose biosynthetic process|GO:0048040:UDP-glucuronate decarboxylase activity|GO:0016831:carboxy-lyase activity|GO:0003824:catalytic activity|GO:0005737:cytoplasm|GO:0005829:cytosol|GO:0008460:dTDP-glucose 4,6-dehydratase activity|G…
PM01G11290	0.53	1.89	0.89	1.45	2.38	5.49	1.52	3.99	GO:0042732:D-xylose metabolic process|GO:0005794:Golgi apparatus|GO:0032580:Golgi cisterna membrane|GO:0000139:Golgi membrane|GO:0070403:NAD+ binding|GO:0033320:UDP-D-xylose biosynthetic process|GO:0048040:UDP-glucuronate decarboxylase activity|GO:0016831:carboxy-lyase activity|GO:0051216:cartilage development|GO:0003824:catalytic activity|GO:0030206:chondroitin sulfate biosynthetic process|GO:00…
PM01G11300	48.4	107.45	78.07	84.62	51.9	54.05	46.17	10.28	GO:0034613:cellular protein localization|GO:0016021:integral component of membrane|GO:0005634:nucleus|GO:0005886:plasma membrane|GO:0005515:protein binding|GO:0009651:response to salt stress|GO:0007165:signal transduction
PM01G11310	3.81	5.73	1.57	0.24	0.93	3.72	0.96	0.01	GO:0008150:biological_process|GO:0005783:endoplasmic reticulum|GO:0016021:integral component of membrane|GO:0003674:molecular_function|GO:0005886:plasma membrane|GO:0007165:signal transduction
PM01G11320	10.09	2.62	0.06	0.3	2.25	0.51	0.34	0.05
PM01G11330	0.31	0.93	0.44	0.29	0.53	1.41	0.03	0.17	GO:0008150:biological_process|GO:0005737:cytoplasm|GO:0005829:cytosol|GO:0005739:mitochondrion|GO:0003674:molecular_function
PM01G11340	22.18	36.86	31.1	57.54	66.35	57.94	48.14	39.48	GO:0005524:ATP binding|GO:0006816:calcium ion transport|GO:0005388:calcium-transporting ATPase activity|GO:0019829:cation-transporting ATPase activity|GO:0030026:cellular manganese ion homeostasis|GO:0005783:endoplasmic reticulum|GO:0005789:endoplasmic reticulum membrane|GO:0030176:integral component of endoplasmic reticulum membrane|GO:0005887:integral component of plasma membrane|GO:0006828:man…
PM01G11350	1.1	1.1	3.24	5.51	4.8	2.83	3.29	4.12	GO:0005938:cell cortex|GO:0005768:endosome|GO:0032039:integrator complex|GO:0010496:intercellular transport|GO:0005634:nucleus|GO:0090057:root radial pattern formation|GO:0016180:snRNA processing
PM01G11360	9.45	3.15	0.24	3.67	3.75	1.94	46.44	0.14	GO:0005524:ATP binding|GO:0042626:ATPase activity, coupled to transmembrane movement of substances|GO:0048226:Casparian strip|GO:0071456:cellular response to hypoxia|GO:0071470:cellular response to osmotic stress|GO:0071472:cellular response to salt stress|GO:0016021:integral component of membrane|GO:0005886:plasma membrane|GO:0010208:pollen wall assembly|GO:1901002:positive regulation of respons…
PM01G11370	11.69	27.29	28.16	34.02	22.29	19.47	18.83	4.75
PM01G11380	0.15	0.38	0.13	0.11	0.02	0.05	0.22	0.16	GO:0004004:ATP-dependent RNA helicase activity|GO:0006396:RNA processing|GO:0005737:cytoplasm|GO:0044822:poly(A) RNA binding|GO:0005681:spliceosomal complex
PM01G11390	15.19	12.97	28.91	35.48	30.74	26.2	28.61	12.16	GO:0008150:biological_process|GO:0009507:chloroplast|GO:0005737:cytoplasm|GO:0016021:integral component of membrane|GO:0003674:molecular_function
PM01G11400	14.32	5.56	9.23	13.6	16.92	10.51	28.27	11.34	GO:0008150:biological_process|GO:0009507:chloroplast|GO:0005739:mitochondrion|GO:0000166:nucleotide binding|GO:0005840:ribosome
PM01G11410	0.3	0.59	0.58	1.06	0.37	0.46	0.26	0.05	GO:0005524:ATP binding|GO:0042626:ATPase activity, coupled to transmembrane movement of substances|GO:0005794:Golgi apparatus|GO:1901527:abscisic acid-activated signaling pathway involved in stomatal movement|GO:0016324:apical plasma membrane|GO:0048046:apoplast|GO:0009986:cell surface|GO:0030007:cellular potassium ion homeostasis|GO:0010290:chlorophyll catabolite transmembrane transporter activi…
PM01G11420	1.01	1.8	2.04	2.97	1.08	1.63	0.91	0.02	GO:0005524:ATP binding|GO:0042626:ATPase activity, coupled to transmembrane movement of substances|GO:0005794:Golgi apparatus|GO:1901527:abscisic acid-activated signaling pathway involved in stomatal movement|GO:0048046:apoplast|GO:0030007:cellular potassium ion homeostasis|GO:0010290:chlorophyll catabolite transmembrane transporter activity|GO:0006855:drug transmembrane transport|GO:0008517:foli…
PM01G11430	14.96	29.42	29.24	12.26	7.9	13.98	18.33	11	GO:0005737:cytoplasm|GO:0006749:glutathione metabolic process|GO:0004364:glutathione transferase activity|GO:0010731:protein glutathionylation
PM01G11440	10.42	18.82	3	4.77	2.09	2.47	279.8	1.52	GO:0005737:cytoplasm|GO:0006749:glutathione metabolic process|GO:0004364:glutathione transferase activity|GO:0010731:protein glutathionylation
PM01G11450	0.02	0	0	0	0	0	2.95	0	GO:0016132:brassinosteroid biosynthetic process|GO:0010268:brassinosteroid homeostasis|GO:0005783:endoplasmic reticulum|GO:0051777:ent-kaurenoate oxidase activity|GO:0009686:gibberellin biosynthetic process|GO:0009685:gibberellin metabolic process|GO:0004497:monooxygenase activity|GO:0007275:multicellular organism development|GO:0016125:sterol metabolic process
PM01G11460	0	0	0	0	0	0	1.48	0	GO:0016132:brassinosteroid biosynthetic process|GO:0010268:brassinosteroid homeostasis|GO:0004497:monooxygenase activity|GO:0007275:multicellular organism development|GO:0016125:sterol metabolic process
PM01G11470	24.58	13.78	15.83	30.01	34.4	23.79	32.99	76.17	GO:0003723:RNA binding|GO:0005654:nucleoplasm|GO:0005634:nucleus|GO:0016973:poly(A)+ mRNA export from nucleus|GO:0005515:protein binding
PM01G11480	8.95	5.96	0.39	1.78	3.52	7.21	0.68	1.2	GO:0009451:RNA modification|GO:0008150:biological_process|GO:0009507:chloroplast|GO:1900865:chloroplast RNA modification|GO:0031425:chloroplast RNA processing|GO:0016554:cytidine to uridine editing|GO:0006397:mRNA processing|GO:0000963:mitochondrial RNA processing|GO:0080156:mitochondrial mRNA modification|GO:0005739:mitochondrion|GO:0003674:molecular_function|GO:0008270:zinc ion binding
PM01G11490	12.27	13.05	8.86	15.56	17.26	18.44	8.69	6.1	GO:0017169:CDP-alcohol phosphatidyltransferase activity|GO:0008444:CDP-diacylglycerol-glycerol-3-phosphate 3-phosphatidyltransferase activity|GO:0009507:chloroplast|GO:0009941:chloroplast envelope|GO:0031969:chloroplast membrane|GO:0005783:endoplasmic reticulum|GO:0046474:glycerophospholipid biosynthetic process|GO:0016021:integral component of membrane|GO:0043231:intracellular membrane-bounded o…
PM01G11500	5.07	11.14	18.69	21.07	20.46	19.85	7.97	9.61	GO:0005096:GTPase activator activity|GO:0017137:Rab GTPase binding|GO:0090630:activation of GTPase activity|GO:0012505:endomembrane system|GO:0005622:intracellular|GO:0006886:intracellular protein transport|GO:0031338:regulation of vesicle fusion
PM01G11510	0.09	0.1	0.33	0.44	0.43	0.62	0.65	1.26	GO:0005524:ATP binding|GO:0009742:brassinosteroid mediated signaling pathway|GO:0009507:chloroplast|GO:0009941:chloroplast envelope|GO:0006952:defense response|GO:0042742:defense response to bacterium|GO:0009816:defense response to bacterium, incompatible interaction|GO:0045087:innate immune response|GO:0016301:kinase activity|GO:0005634:nucleus|GO:0002221:pattern recognition receptor signaling p…
PM01G11520	2.7	1.42	2.13	1.79	2.08	2.01	3.34	4.12	GO:0033588:Elongator holoenzyme complex|GO:0008150:biological_process|GO:0005575:cellular_component|GO:0005737:cytoplasm|GO:0003674:molecular_function|GO:0031538:negative regulation of anthocyanin metabolic process|GO:0005634:nucleus|GO:0030335:positive regulation of cell migration|GO:0008284:positive regulation of cell proliferation|GO:0005515:protein binding|GO:2000024:regulation of leaf develo…
PM01G11530	102.56	51.48	260.44	182.93	126.65	109.56	95.9	11.43	GO:0003677:DNA binding|GO:0071368:cellular response to cytokinin stimulus|GO:0007623:circadian rhythm|GO:0010031:circumnutation|GO:0009736:cytokinin-activated signaling pathway|GO:0009873:ethylene-activated signaling pathway|GO:0009908:flower development|GO:0010150:leaf senescence|GO:0005739:mitochondrion|GO:0010629:negative regulation of gene expression|GO:0045892:negative regulation of transcri…
PM01G11540	29.16	21.82	22.36	9.01	4.13	5.93	1.95	2.21	GO:0008150:biological_process|GO:0005575:cellular_component|GO:0009507:chloroplast|GO:0009570:chloroplast stroma|GO:0005737:cytoplasm|GO:0005829:cytosol|GO:0005783:endoplasmic reticulum|GO:0005576:extracellular region|GO:0006633:fatty acid biosynthetic process|GO:0006631:fatty acid metabolic process|GO:0006629:lipid metabolic process|GO:0003674:molecular_function|GO:0043209:myelin sheath|GO:00056…
PM01G11550	2.95	1.54	0.92	2.51	6.68	3.85	6.08	1.24	GO:0005524:ATP binding|GO:0003677:DNA binding|GO:0000737:DNA catabolic process, endonucleolytic|GO:0006259:DNA metabolic process|GO:0009330:DNA topoisomerase complex (ATP-hydrolyzing)|GO:0003918:DNA topoisomerase type II (ATP-hydrolyzing) activity|GO:0006265:DNA topological change|GO:0003824:catalytic activity|GO:0005694:chromosome|GO:0000781:chromosome, telomeric region|GO:0009957:epidermal cell…
PM01G11560	65.02	31.53	48.2	17.08	6.17	15.36	2.09	1.98	GO:0008150:biological_process|GO:0009507:chloroplast|GO:0009535:chloroplast thylakoid membrane|GO:0016021:integral component of membrane|GO:0005739:mitochondrion|GO:0003674:molecular_function
PM01G11570	6.78	2.93	46.56	11.17	4.09	3.97	2.12	0.06
PM01G11580	51.28	27.15	29.87	54.63	60.71	49.47	171.83	1.8	GO:0005794:Golgi apparatus|GO:0016688:L-ascorbate peroxidase activity|GO:0005618:cell wall|GO:0098869:cellular oxidant detoxification|GO:0005575:cellular_component|GO:0009507:chloroplast|GO:0009941:chloroplast envelope|GO:0009570:chloroplast stroma|GO:0005737:cytoplasm|GO:0005829:cytosol|GO:0009793:embryo development ending in seed dormancy|GO:0046861:glyoxysomal membrane|GO:0009514:glyoxysome|GO…
PM01G11590	33.74	81.67	21.82	61.41	13.14	9.07	107.72	2.2	GO:0005524:ATP binding|GO:0007186:G-protein coupled receptor signaling pathway|GO:0004707:MAP kinase activity|GO:0000165:MAPK cascade|GO:0009738:abscisic acid-activated signaling pathway|GO:0000169:activation of MAPK activity involved in osmosensory signaling pathway|GO:0031152:aggregation involved in sorocarp development|GO:0019954:asexual reproduction|GO:0060918:auxin transport|GO:0009734:auxin…
PM01G11600	6.48	6.5	13.3	7.71	5.21	5.61	5.42	26.24	GO:0009094:L-phenylalanine biosynthetic process|GO:0016597:amino acid binding|GO:0047769:arogenate dehydratase activity|GO:0009095:aromatic amino acid family biosynthetic process, prephenate pathway|GO:0009507:chloroplast|GO:0009570:chloroplast stroma|GO:0004106:chorismate mutase activity|GO:0005829:cytosol|GO:0004664:prephenate dehydratase activity|GO:0080167:response to karrikin|GO:0010244:resp…
PM01G11610	58.84	66.14	34.61	59.05	63.02	70.22	146.44	11.08	GO:0005457:GDP-fucose transmembrane transporter activity|GO:0015783:GDP-fucose transport|GO:0005794:Golgi apparatus|GO:0000139:Golgi membrane|GO:0072334:UDP-galactose transmembrane transport|GO:0005459:UDP-galactose transmembrane transporter activity|GO:0005460:UDP-glucose transmembrane transporter activity|GO:0015786:UDP-glucose transport|GO:0034219:carbohydrate transmembrane transport|GO:000864…
PM01G11620	8.74	1.13	0	0.05	13.05	0.86	6.9	0.12	GO:0070935:3'-UTR-mediated mRNA stabilization|GO:0006977:DNA damage response, signal transduction by p53 class mediator resulting in cell cycle arrest|GO:0006978:DNA damage response, signal transduction by p53 class mediator resulting in transcription of p21 class mediator|GO:0003723:RNA binding|GO:0008380:RNA splicing|GO:0008150:biological_process|GO:0007049:cell cycle|GO:0007050:cell cycle arre…
PM01G11630	3.61	3.84	9.86	13.19	11.46	10.82	8.49	25.55	GO:0080008:Cul4-RING E3 ubiquitin ligase complex|GO:0008150:biological_process|GO:0005737:cytoplasm|GO:0030529:intracellular ribonucleoprotein complex|GO:0003674:molecular_function|GO:0000166:nucleotide binding|GO:0005634:nucleus|GO:0005777:peroxisome|GO:0005515:protein binding|GO:0016567:protein ubiquitination
PM01G11640	28.09	14.4	1.37	0.26	0.46	6.39	7.15	414.26	GO:0008150:biological_process|GO:0005575:cellular_component|GO:0050832:defense response to fungus|GO:0042538:hyperosmotic salinity response|GO:0016021:integral component of membrane|GO:0003674:molecular_function|GO:0005886:plasma membrane|GO:0009737:response to abscisic acid|GO:0009409:response to cold|GO:0009651:response to salt stress|GO:0009414:response to water deprivation
PM01G11650	27.33	24.99	12.04	11.56	6.69	6	27.84	1.83	GO:0005794:Golgi apparatus|GO:0016006:Nebenkern|GO:0000915:actomyosin contractile ring assembly|GO:0000916:actomyosin contractile ring contraction|GO:0031566:actomyosin contractile ring maintenance|GO:0006915:apoptotic process|GO:0007409:axonogenesis|GO:0043009:chordate embryonic development|GO:0032154:cleavage furrow|GO:0005737:cytoplasm|GO:0005829:cytosol|GO:0009792:embryo development ending in…
PM01G11660	1.26	1.5	0.03	0.03	0.02	0.15	0.86	0.04	GO:0003677:DNA binding|GO:0008150:biological_process|GO:0009965:leaf morphogenesis|GO:0016020:membrane|GO:0005739:mitochondrion|GO:0003674:molecular_function|GO:0005634:nucleus|GO:0010199:organ boundary specification between lateral organs and the meristem|GO:0048441:petal development|GO:0009954:proximal/distal pattern formation|GO:0006355:regulation of transcription, DNA-templated|GO:0010016:sho…
PM01G11670	27.23	60.27	0.3	1.45	8.44	10.33	16.91	0.47	GO:0010417:glucuronoxylan biosynthetic process|GO:0009834:plant-type secondary cell wall biogenesis|GO:0042285:xylosyltransferase activity
PM01G11680	24.74	39.36	0.5	2.02	10.84	20.93	20.97	1.71	GO:0010417:glucuronoxylan biosynthetic process|GO:0009834:plant-type secondary cell wall biogenesis|GO:0042285:xylosyltransferase activity
PM01G11690	24.86	20.19	17.23	22.26	25.38	35.22	10.97	7.4	GO:0016787:hydrolase activity
PM01G11700	15.36	13.77	23.92	26.08	32.56	25.44	19.5	31.1	GO:0008150:biological_process|GO:0009507:chloroplast|GO:0016021:integral component of membrane|GO:0031966:mitochondrial membrane|GO:0003674:molecular_function
PM01G11710	0.71	0.69	2.05	2.51	1.32	1.89	2.42	3.2	GO:0019239:deaminase activity|GO:0000455:enzyme-directed rRNA pseudouridine synthesis|GO:0009982:pseudouridine synthase activity|GO:0002100:tRNA wobble adenosine to inosine editing
PM01G11720	10.33	10.01	6.27	7.55	6.76	11.49	16.32	6.46	GO:0009507:chloroplast|GO:0009706:chloroplast inner membrane|GO:0006651:diacylglycerol biosynthetic process|GO:0047874:dolichyldiphosphatase activity|GO:0030176:integral component of endoplasmic reticulum membrane|GO:0008195:phosphatidate phosphatase activity|GO:0048868:pollen tube development|GO:0006487:protein N-linked glycosylation
PM01G11730	3.19	1.95	3.99	8.87	9.9	7.25	8.37	24.27	GO:0008150:biological_process|GO:0005575:cellular_component|GO:0016021:integral component of membrane|GO:0016020:membrane|GO:0003674:molecular_function|GO:0005634:nucleus
PM01G11740	1.07	0.11	0.02	0.36	2.49	1.05	1.11	0.51	GO:0008150:biological_process|GO:0009507:chloroplast|GO:0003674:molecular_function|GO:0005886:plasma membrane
PM01G11750	13.51	11.55	36.69	36.53	16.61	19.59	71.38	14.97	GO:0005737:cytoplasm|GO:0035556:intracellular signal transduction|GO:0005634:nucleus|GO:0006468:protein phosphorylation|GO:0004674:protein serine/threonine kinase activity
PM01G11760	2.11	2.01	2.65	3.46	4.24	3.21	5.52	3.8	GO:0030134:ER to Golgi transport vesicle|GO:0005794:Golgi apparatus|GO:0032580:Golgi cisterna membrane|GO:0000139:Golgi membrane|GO:0008150:biological_process|GO:0009507:chloroplast|GO:0005783:endoplasmic reticulum|GO:0070971:endoplasmic reticulum exit site|GO:0005789:endoplasmic reticulum membrane|GO:0016021:integral component of membrane|GO:0016020:membrane|GO:0003674:molecular_function|GO:0042…
PM01G11770	0.88	1.07	0.58	0.54	0.8	16.96	0.5	0.23	GO:0009738:abscisic acid-activated signaling pathway|GO:0001525:angiogenesis|GO:0055074:calcium ion homeostasis|GO:0005737:cytoplasm|GO:0005829:cytosol|GO:0009553:embryo sac development|GO:0048437:floral organ development|GO:0010286:heat acclimation|GO:0016787:hydrolase activity|GO:0005622:intracellular|GO:0035556:intracellular signal transduction|GO:0060716:labyrinthine layer blood vessel develo…
PM01G11780	3.37	7.49	0.42	0.3	0.38	1.28	0.25	0.03	GO:0051213:dioxygenase activity
PM01G11790	176.22	435.66	43.8	42.78	35.69	87.83	20.33	6.12	GO:0036109:alpha-linolenic acid metabolic process|GO:0009507:chloroplast|GO:0009941:chloroplast envelope|GO:0009706:chloroplast inner membrane|GO:0031969:chloroplast membrane|GO:0005783:endoplasmic reticulum|GO:0005789:endoplasmic reticulum membrane|GO:0006633:fatty acid biosynthetic process|GO:0030176:integral component of endoplasmic reticulum membrane|GO:0016021:integral component of membrane|…
PM01G11800	4.3	6.43	7.72	8.22	8.74	10.77	9.88	2.91	GO:0043726:5-amino-6-(5-phosphoribitylamino)uracil phosphatase activity|GO:0032281:AMPA glutamate receptor complex|GO:0005794:Golgi apparatus|GO:0000139:Golgi membrane|GO:1990003:IDP phosphatase activity|GO:0008579:JUN kinase phosphatase activity|GO:0017017:MAP kinase tyrosine/serine/threonine phosphatase activity|GO:0019178:NADP phosphatase activity|GO:0008150:biological_process|GO:0009932:cell …
PM01G11810	0.38	0.57	0.04	0.26	1.59	1.02	0.2	0.86	GO:0005524:ATP binding|GO:0004003:ATP-dependent DNA helicase activity|GO:0043044:ATP-dependent chromatin remodeling|GO:0008026:ATP-dependent helicase activity|GO:0016887:ATPase activity|GO:0003677:DNA binding|GO:0032508:DNA duplex unwinding|GO:0003678:DNA helicase activity|GO:0008080:N-acetyltransferase activity|GO:0016581:NuRD complex|GO:0000978:RNA polymerase II core promoter proximal region se…
PM01G11820	3.17	1.18	0.22	0.29	2.59	0.19	3.32	0.08	GO:0005794:Golgi apparatus|GO:0016413:O-acetyltransferase activity|GO:0071554:cell wall organization or biogenesis
PM01G11830	0.29	0.13	0	0	2.58	0.4	0.06	0.09	GO:0005794:Golgi apparatus|GO:0000139:Golgi membrane|GO:0016413:O-acetyltransferase activity|GO:0071554:cell wall organization or biogenesis|GO:0030244:cellulose biosynthetic process|GO:0016021:integral component of membrane|GO:0005739:mitochondrion|GO:0045489:pectin biosynthetic process|GO:0009827:plant-type cell wall modification|GO:0005886:plasma membrane|GO:1990538:xylan O-acetyltransferase a…
PM01G11840	45.99	147.23	4.91	5.07	1.89	46.41	54.27	38.34	GO:0006529:asparagine biosynthetic process|GO:0004066:asparagine synthase (glutamine-hydrolyzing) activity|GO:0005829:cytosol|GO:0006541:glutamine metabolic process|GO:0042803:protein homodimerization activity|GO:0009646:response to absence of light
PM01G11850	9.03	9.68	0.36	2.12	20.57	25.82	5.38	0.05	GO:0005794:Golgi apparatus|GO:0000139:Golgi membrane|GO:0016413:O-acetyltransferase activity|GO:0071554:cell wall organization or biogenesis|GO:0016021:integral component of membrane|GO:0005634:nucleus|GO:0045893:positive regulation of transcription, DNA-templated|GO:0009409:response to cold|GO:0050826:response to freezing|GO:0009651:response to salt stress|GO:0009414:response to water deprivatio…
PM01G11860	133.9	105.57	9.06	64.04	28.03	8.75	39.09	4.36	GO:0009738:abscisic acid-activated signaling pathway|GO:0048046:apoplast|GO:0005575:cellular_component|GO:0009507:chloroplast|GO:0042742:defense response to bacterium|GO:0050832:defense response to fungus|GO:0044419:interspecies interaction between organisms|GO:0046872:metal ion binding|GO:0005634:nucleus|GO:0005886:plasma membrane|GO:0009536:plastid|GO:0006470:protein dephosphorylation|GO:000472…
PM01G11870	17.63	25.18	15.73	14.62	9.29	9.73	8.5	24.55	GO:0016021:integral component of membrane|GO:0005743:mitochondrial inner membrane|GO:0006839:mitochondrial transport|GO:0005739:mitochondrion|GO:0003735:structural constituent of ribosome|GO:0015141:succinate transmembrane transporter activity|GO:0015744:succinate transport|GO:0006412:translation|GO:0006810:transport
PM01G11880	1	0.62	0.35	0.17	0.28	0.13	0.68	0	GO:0005524:ATP binding|GO:0009658:chloroplast organization|GO:0005737:cytoplasm|GO:0016021:integral component of membrane|GO:0016301:kinase activity|GO:0005634:nucleus|GO:0045893:positive regulation of transcription, DNA-templated|GO:0046777:protein autophosphorylation|GO:0004672:protein kinase activity|GO:0006468:protein phosphorylation|GO:0004674:protein serine/threonine kinase activity|GO:0004…
PM01G11890	84.03	46.68	30.2	50.76	98.37	54.71	47.42	77.16	GO:0000082:G1/S transition of mitotic cell cycle|GO:0005096:GTPase activator activity|GO:0006405:RNA export from nucleus|GO:0008536:Ran GTPase binding|GO:0005813:centrosome|GO:0005737:cytoplasm|GO:0005634:nucleus|GO:0046604:positive regulation of mitotic centrosome separation|GO:0006606:protein import into nucleus|GO:0007051:spindle organization|GO:0006511:ubiquitin-dependent protein catabolic pr…
PM01G11900	9.77	3	5.79	6.6	7.73	11.56	5.38	16.51	GO:0005524:ATP binding|GO:0008150:biological_process|GO:0005623:cell|GO:0045454:cell redox homeostasis|GO:0034605:cellular response to heat|GO:0005575:cellular_component|GO:0009507:chloroplast|GO:0009941:chloroplast envelope|GO:0009535:chloroplast thylakoid membrane|GO:0005788:endoplasmic reticulum lumen|GO:0031072:heat shock protein binding|GO:0016021:integral component of membrane|GO:0016020:me…
PM01G11910	18.98	20.11	16.95	8.12	4.07	7.58	0.13	0.48	GO:0008150:biological_process|GO:0009535:chloroplast thylakoid membrane|GO:0016021:integral component of membrane|GO:0005739:mitochondrion|GO:0003674:molecular_function
PM01G11920	2.37	3.78	7.16	10.38	7.97	6.9	5.37	16.86	GO:0005524:ATP binding|GO:0033699:DNA 5'-adenosine monophosphate hydrolase activity|GO:0003677:DNA binding|GO:0006266:DNA ligation|GO:0006281:DNA repair|GO:0006260:DNA replication|GO:0003923:GPI-anchor transamidase activity|GO:0047627:adenylylsulfatase activity|GO:0003824:catalytic activity|GO:0006974:cellular response to DNA damage stimulus|GO:0000785:chromatin|GO:0003682:chromatin binding|GO:00…
PM01G11930	4.81	4.27	44.48	21.26	10.69	7.91	12.51	18.7	GO:0008150:biological_process|GO:0005575:cellular_component|GO:0009507:chloroplast|GO:0005829:cytosol|GO:0006091:generation of precursor metabolites and energy|GO:0042802:identical protein binding|GO:0000287:magnesium ion binding|GO:0016020:membrane|GO:0046872:metal ion binding|GO:0005634:nucleus|GO:0004737:pyruvate decarboxylase activity|GO:0006090:pyruvate metabolic process|GO:0034059:response …
PM01G11940	3.8	7.08	0.32	4.15	7.3	27.42	0.99	0.7	GO:0009507:chloroplast|GO:0009941:chloroplast envelope|GO:0009658:chloroplast organization|GO:0009707:chloroplast outer membrane|GO:0003674:molecular_function
PM01G11950	3.19	5.35	10.64	10.85	7.92	9.08	3.91	9.63	GO:0003873:6-phosphofructo-2-kinase activity|GO:0043540:6-phosphofructo-2-kinase/fructose-2,6-biphosphatase complex|GO:0005524:ATP binding|GO:0046835:carbohydrate phosphorylation|GO:0003824:catalytic activity|GO:0005575:cellular_component|GO:0005737:cytoplasm|GO:0005829:cytosol|GO:0016311:dephosphorylation|GO:0006003:fructose 2,6-bisphosphate metabolic process|GO:0006002:fructose 6-phosphate meta…
PM01G11960	0.05	0	0	0	0	0	0.09	0	GO:0003677:DNA binding|GO:0009793:embryo development ending in seed dormancy|GO:0005634:nucleus|GO:0006355:regulation of transcription, DNA-templated|GO:0010431:seed maturation|GO:0003700:transcription factor activity, sequence-specific DNA binding|GO:0006351:transcription, DNA-templated
PM01G11970	0.25	0.21	0.07	0.15	0.44	0.35	0.22	0.17	GO:0003677:DNA binding|GO:0008652:cellular amino acid biosynthetic process|GO:0005737:cytoplasm|GO:0009793:embryo development ending in seed dormancy|GO:0016301:kinase activity|GO:0005634:nucleus|GO:0016310:phosphorylation|GO:0010468:regulation of gene expression|GO:0006355:regulation of transcription, DNA-templated|GO:0010431:seed maturation|GO:0003700:transcription factor activity, sequence-spe…
PM01G11980	0	0	0	0	0	0.02	0	0.02
PM01G11990	0	0	0	0	0	0.05	0	0.09	GO:0052689:carboxylic ester hydrolase activity|GO:0005737:cytoplasm|GO:0008474:palmitoyl-(protein) hydrolase activity|GO:0002084:protein depalmitoylation
PM01G12000	0.15	0.68	2.88	1.96	2.96	7.45	0.44	3.8	GO:0016036:cellular response to phosphate starvation|GO:0009693:ethylene biosynthetic process|GO:0009873:ethylene-activated signaling pathway|GO:0005634:nucleus|GO:0043161:proteasome-mediated ubiquitin-dependent protein catabolic process|GO:0005515:protein binding|GO:0030674:protein binding, bridging|GO:0016567:protein ubiquitination|GO:0010364:regulation of ethylene biosynthetic process|GO:20000…
PM01G12010	15.19	14.64	4.41	5.84	30.29	18.65	7.32	2.56	GO:0005524:ATP binding|GO:0009507:chloroplast|GO:0005737:cytoplasm|GO:0012505:endomembrane system|GO:0016021:integral component of membrane|GO:0016301:kinase activity|GO:0005634:nucleus|GO:0016310:phosphorylation|GO:0005886:plasma membrane|GO:0090406:pollen tube|GO:0004672:protein kinase activity|GO:0006468:protein phosphorylation|GO:0004674:protein serine/threonine kinase activity|GO:0048765:roo…
PM01G12020	1.68	1.18	0.75	3.05	2.94	2.69	1.17	13.6	GO:0005829:cytosol|GO:0019941:modification-dependent protein catabolic process|GO:0005634:nucleus|GO:0004839:ubiquitin activating enzyme activity|GO:0004842:ubiquitin-protein transferase activity
PM01G12030	6.92	2.41	2.15	3.83	6.29	5.96	10.09	3.86	GO:0008137:NADH dehydrogenase (ubiquinone) activity|GO:0009507:chloroplast|GO:0006120:mitochondrial electron transport, NADH to ubiquinone|GO:0005758:mitochondrial intermembrane space|GO:0005747:mitochondrial respiratory chain complex I|GO:0005739:mitochondrion|GO:0055114:oxidation-reduction process|GO:0009536:plastid
PM01G12040	5.72	1.86	0.85	19.67	25.97	19.34	2.49	10.58	GO:0005524:ATP binding|GO:0016597:amino acid binding|GO:0086069:bundle of His cell to Purkinje myocyte communication|GO:0009658:chloroplast organization|GO:0005737:cytoplasm|GO:0005829:cytosol|GO:0016301:kinase activity|GO:0046872:metal ion binding|GO:0000166:nucleotide binding|GO:0005634:nucleus|GO:0016310:phosphorylation|GO:0005886:plasma membrane|GO:0008022:protein C-terminus binding|GO:000467…
PM01G12050	4.5	5.45	10.35	13.46	12.59	11.1	7.93	13.47	GO:0005096:GTPase activator activity|GO:0009507:chloroplast|GO:0005737:cytoplasm|GO:0043547:positive regulation of GTPase activity
PM01G12060	23.43	22.03	46.05	56.39	33.45	31.9	43.72	87.89	GO:0042590:antigen processing and presentation of exogenous peptide antigen via MHC class I|GO:0019886:antigen processing and presentation of exogenous peptide antigen via MHC class II|GO:0008150:biological_process|GO:0003824:catalytic activity|GO:0030054:cell junction|GO:0005737:cytoplasm|GO:0005576:extracellular region|GO:0043231:intracellular membrane-bounded organelle|GO:0005764:lysosome|GO:0…
PM01G12070	7.56	5.18	0.27	1.15	5.2	2.43	0.48	30.21
PM01G12080	18.76	5.56	12.91	11.43	14.2	13.49	11.25	14.16	GO:0015450:P-P-bond-hydrolysis-driven protein transmembrane transporter activity|GO:0009507:chloroplast|GO:0009793:embryo development ending in seed dormancy|GO:0016021:integral component of membrane|GO:0005743:mitochondrial inner membrane|GO:0005744:mitochondrial inner membrane presequence translocase complex|GO:0015266:protein channel activity|GO:0033365:protein localization to organelle|GO:001…
PM01G12090	25.07	22.11	26.16	34.31	48.34	45.47	49.61	38.92	GO:0033290:eukaryotic 48S preinitiation complex|GO:0005850:eukaryotic translation initiation factor 2 complex|GO:0005851:eukaryotic translation initiation factor 2B complex|GO:0043614:multi-eIF complex|GO:0005840:ribosome|GO:0043022:ribosome binding|GO:0003743:translation initiation factor activity|GO:0006413:translational initiation
PM01G12100	8.12	4.47	1.43	0.6	1.95	1.96	0.74	0.46	GO:0031225:anchored component of membrane|GO:0046658:anchored component of plasma membrane|GO:0005975:carbohydrate metabolic process|GO:0005618:cell wall|GO:0071555:cell wall organization|GO:0006952:defense response|GO:0005576:extracellular region|GO:0042973:glucan endo-1,3-beta-D-glucosidase activity|GO:0004553:hydrolase activity, hydrolyzing O-glycosyl compounds|GO:0005886:plasma membrane|GO:00…
PM01G12110	0.52	0.07	0.04	0.08	0.18	0.06	0.32	0.33	GO:0009507:chloroplast|GO:0016023:cytoplasmic, membrane-bounded vesicle|GO:0009567:double fertilization forming a zygote and endosperm|GO:0005576:extracellular region|GO:0005622:intracellular|GO:0003674:molecular_function|GO:0080155:regulation of double fertilization forming a zygote and endosperm|GO:2000008:regulation of protein localization to cell surface|GO:0007338:single fertilization|GO:004…
PM01G12120	3.15	1.7	2.48	1.81	2.58	1.87	0.55	6.95	GO:0009507:chloroplast|GO:0016021:integral component of membrane|GO:0003674:molecular_function
PM01G12130	5.21	3.57	5.81	4.55	5.33	4.41	14.34	7.49	GO:0016021:integral component of membrane|GO:0005743:mitochondrial inner membrane|GO:0006839:mitochondrial transport|GO:0005739:mitochondrion|GO:0003735:structural constituent of ribosome|GO:0006412:translation|GO:0055085:transmembrane transport|GO:0006810:transport
PM01G12140	18.32	26.21	14.7	22.61	4.87	6.49	20.1	8.81	GO:0008150:biological_process|GO:0005575:cellular_component|GO:0009507:chloroplast|GO:0005576:extracellular region|GO:0003674:molecular_function|GO:0005774:vacuolar membrane|GO:0005773:vacuole
PM01G12150	185.77	83.36	71.71	104.42	201.94	139.86	193.63	345.44	GO:0030686:90S preribosome|GO:0022627:cytosolic small ribosomal subunit|GO:0006364:rRNA processing|GO:0042274:ribosomal small subunit biogenesis|GO:0032040:small-subunit processome
PM01G12160	15.12	11.02	5.54	12.5	11.41	9.91	17.54	8.33	GO:0003824:catalytic activity|GO:0009507:chloroplast|GO:0009570:chloroplast stroma|GO:0005829:cytosol|GO:0006633:fatty acid biosynthetic process|GO:0006631:fatty acid metabolic process|GO:0006629:lipid metabolic process|GO:0008152:metabolic process|GO:0005739:mitochondrion|GO:0044822:poly(A) RNA binding|GO:0016740:transferase activity
PM01G12170	5.6	8.65	11.11	7.12	10.1	8.92	37.71	3.27	GO:0010427:abscisic acid binding|GO:0009738:abscisic acid-activated signaling pathway|GO:0005737:cytoplasm|GO:0005634:nucleus|GO:0004864:protein phosphatase inhibitor activity|GO:0004872:receptor activity|GO:0080163:regulation of protein serine/threonine phosphatase activity
PM01G12180	15	25.55	25.86	17.05	22.03	10.31	43.91	2.18	GO:0010427:abscisic acid binding|GO:0009738:abscisic acid-activated signaling pathway|GO:0005737:cytoplasm|GO:0005634:nucleus|GO:0004864:protein phosphatase inhibitor activity|GO:0004872:receptor activity|GO:0080163:regulation of protein serine/threonine phosphatase activity
PM01G12190	1.58	1.33	2.02	1.61	2.06	1.71	2.56	6.42	GO:0000373:Group II intron splicing|GO:0003723:RNA binding|GO:0008150:biological_process|GO:0009507:chloroplast|GO:0009658:chloroplast organization|GO:0005739:mitochondrion|GO:0003674:molecular_function|GO:0009295:nucleoid|GO:0005634:nucleus|GO:0009508:plastid chromosome|GO:0045893:positive regulation of transcription, DNA-templated|GO:0042793:transcription from plastid promoter|GO:0006810:transp…
PM01G12200	2.74	0.43	0	0.04	5.61	0.28	6.12	0	GO:0005524:ATP binding|GO:0005618:cell wall|GO:0009553:embryo sac development|GO:0005576:extracellular region|GO:0016021:integral component of membrane|GO:0016301:kinase activity|GO:0016020:membrane|GO:0048481:plant ovule development|GO:0009505:plant-type cell wall|GO:0009834:plant-type secondary cell wall biogenesis|GO:0005886:plasma membrane|GO:0009506:plasmodesma|GO:0004672:protein kinase acti…
PM01G12210	0.57	0.05	0	0.01	0.02	0.02	2.57	0	GO:0048046:apoplast|GO:0005507:copper ion binding|GO:0005576:extracellular region|GO:0052716:hydroquinone:oxygen oxidoreductase activity|GO:0046274:lignin catabolic process|GO:0055114:oxidation-reduction process|GO:0016722:oxidoreductase activity, oxidizing metal ions|GO:0046688:response to copper ion
PM01G12220	0.07	0	0	0	0	0	0.24	0	GO:0008150:biological_process|GO:0009507:chloroplast|GO:0003674:molecular_function
PM01G12230	0.03	0.02	0	0.01	0.16	1.09	0.05	0.02	GO:0008757:S-adenosylmethionine-dependent methyltransferase activity|GO:0005737:cytoplasm|GO:0032259:methylation
PM01G12240	0	0	0	0	0	0	0	0
PM01G12250	4.34	2.37	2.06	3.3	2.32	1.12	9.52	0.4	GO:0016021:integral component of membrane|GO:0016020:membrane|GO:0005634:nucleus|GO:0005886:plasma membrane
PM01G12260	46.95	46.42	67.98	91.52	67.11	63.92	77.09	127.86	GO:0005524:ATP binding|GO:0016887:ATPase activity|GO:0030433:ER-associated ubiquitin-dependent protein catabolic process|GO:0017025:TBP-class protein binding|GO:0005829:cytosol|GO:0031597:cytosolic proteasome complex|GO:0007292:female gamete generation|GO:0045087:innate immune response|GO:0010311:lateral root formation|GO:0009965:leaf morphogenesis|GO:0010078:maintenance of root meristem identity…
PM01G12270	9.25	4.94	6.68	8.5	8.43	5.8	11.81	9.41	GO:0008150:biological_process|GO:0005634:nucleus
PM01G12280	1.27	1.52	0.17	0.41	3.24	4.07	3.21	2.87	GO:0038096:Fc-gamma receptor signaling pathway involved in phagocytosis|GO:0016601:Rac protein signal transduction|GO:0031209:SCAR complex|GO:0003779:actin binding|GO:0015629:actin cytoskeleton|GO:0030036:actin cytoskeleton organization|GO:0030048:actin filament-based movement|GO:0003785:actin monomer binding|GO:0045010:actin nucleation|GO:0007188:adenylate cyclase-modulating G-protein coupled re…
PM01G12290	21.17	12.41	24.8	29.37	29.46	19.94	32.33	144.29	GO:0015030:Cajal body|GO:0003723:RNA binding|GO:0030619:U1 snRNA binding|GO:0005685:U1 snRNP|GO:0005686:U2 snRNP|GO:0000354:cis assembly of pre-catalytic spliceosome|GO:0005737:cytoplasm|GO:0000398:mRNA splicing, via spliceosome|GO:0005730:nucleolus|GO:0005654:nucleoplasm|GO:0000166:nucleotide binding|GO:0005634:nucleus|GO:0017069:snRNA binding|GO:0035614:snRNA stem-loop binding|GO:0005681:splice…
PM01G12300	5.98	7.13	0.05	0.53	0.36	0.66	10.28	0.08	GO:0009688:abscisic acid biosynthetic process|GO:0004022:alcohol dehydrogenase (NAD) activity|GO:0005575:cellular_component|GO:0005507:copper ion binding|GO:0005737:cytoplasm|GO:0005829:cytosol|GO:0042742:defense response to bacterium|GO:0005576:extracellular region|GO:0005739:mitochondrion|GO:0055114:oxidation-reduction process|GO:0016491:oxidoreductase activity|GO:0009626:plant-type hypersensit…
PM01G12310	5.85	4.92	30.35	21.53	9.21	3.29	37.72	0.4	GO:0007568:aging|GO:0008150:biological_process|GO:0005575:cellular_component|GO:0003674:molecular_function|GO:0009620:response to fungus
PM01G12320	1	1.07	2.8	4.31	0.64	1.07	6.08	0.29	GO:0008150:biological_process|GO:0016021:integral component of membrane|GO:0003674:molecular_function|GO:0005634:nucleus|GO:0005886:plasma membrane
PM01G12330	13.99	14.37	7.37	10.51	16.34	17.5	7.65	7.87	GO:0010285:L,L-diaminopimelate aminotransferase activity|GO:0004069:L-aspartate:2-oxoglutarate aminotransferase activity|GO:0006532:aspartate biosynthetic process|GO:0008150:biological_process|GO:0009507:chloroplast|GO:0009570:chloroplast stroma|GO:0005507:copper ion binding|GO:0005829:cytosol|GO:0042742:defense response to bacterium|GO:0010150:leaf senescence|GO:0009089:lysine biosynthetic proce…
PM01G12340	20.27	23.75	0.58	3.62	15.97	8.25	21.24	4.11	GO:0005794:Golgi apparatus|GO:0000139:Golgi membrane|GO:0006491:N-glycan processing|GO:0035252:UDP-xylosyltransferase activity|GO:0031278:alpha-1,2-galactosyltransferase activity|GO:0005783:endoplasmic reticulum|GO:0005768:endosome|GO:0009272:fungal-type cell wall biogenesis|GO:0010392:galactoglucomannan metabolic process|GO:0051070:galactomannan biosynthetic process|GO:0008378:galactosyltransfer…
PM01G12350	1.81	1.78	2.9	3.55	4.27	4.53	4.68	14.57	GO:0003677:DNA binding|GO:0006919:activation of cysteine-type endopeptidase activity involved in apoptotic process|GO:0006915:apoptotic process|GO:0008283:cell proliferation|GO:0005737:cytoplasm|GO:0035162:embryonic hemopoiesis|GO:0019899:enzyme binding|GO:0030218:erythrocyte differentiation|GO:0070062:extracellular exosome|GO:0060218:hematopoietic stem cell differentiation|GO:0046872:metal ion b…
PM01G12360	2.77	1.31	1.93	4.7	5.85	3.78	6.92	25.31	GO:0001525:angiogenesis|GO:0008150:biological_process|GO:0005938:cell cortex|GO:0009267:cellular response to starvation|GO:0005813:centrosome|GO:0045502:dynein binding|GO:0048703:embryonic viscerocranium morphogenesis|GO:0000132:establishment of mitotic spindle orientation|GO:0001650:fibrillar center|GO:0060218:hematopoietic stem cell differentiation|GO:0000776:kinetochore|GO:0005874:microtubule|…
PM01G12370	12.35	9.11	20.25	20.48	16.04	16.28	16.24	15.33	GO:0008150:biological_process|GO:0005783:endoplasmic reticulum|GO:0016021:integral component of membrane|GO:0044351:macropinocytosis|GO:0016020:membrane|GO:0005739:mitochondrion|GO:0003674:molecular_function
PM01G12380	1.08	0.57	0.92	0.98	2.01	0.37	0.75	0.61	GO:0008150:biological_process|GO:0005575:cellular_component|GO:0009507:chloroplast|GO:0005856:cytoskeleton|GO:0009567:double fertilization forming a zygote and endosperm|GO:0005739:mitochondrion|GO:0003674:molecular_function|GO:0005634:nucleus|GO:0005777:peroxisome|GO:0005774:vacuolar membrane|GO:0006904:vesicle docking involved in exocytosis
PM01G12390	17.71	3.89	0.59	25.68	11.46	21.92	0	0.31	GO:0048046:apoplast|GO:0052689:carboxylic ester hydrolase activity|GO:0005618:cell wall|GO:0009507:chloroplast|GO:0009534:chloroplast thylakoid|GO:0005576:extracellular region|GO:0016788:hydrolase activity, acting on ester bonds|GO:0016298:lipase activity|GO:0016042:lipid catabolic process
PM01G12400	0.28	0.22	0.09	0.23	0.21	0.19	0.24	0.03
PM01G12410	3.55	1.46	0	2.25	1.07	8.66	0.02	0
PM01G12420	6.2	31.5	36.83	40.69	18.58	30.71	32.68	21.11	GO:0008020:G-protein coupled photoreceptor activity|GO:0009687:abscisic acid metabolic process|GO:0006325:chromatin organization|GO:0010617:circadian regulation of calcium ion oscillation|GO:0005829:cytosol|GO:0009584:detection of visible light|GO:0009649:entrainment of circadian clock|GO:0031516:far-red light photoreceptor activity|GO:0009630:gravitropism|GO:0042802:identical protein binding|GO:…
PM01G12430	1.69	1.89	10.75	10.9	8.47	7.39	4.37	18.38	GO:0003723:RNA binding|GO:0005829:cytosol|GO:0042802:identical protein binding|GO:0006379:mRNA cleavage|GO:0005847:mRNA cleavage and polyadenylation specificity factor complex|GO:0006378:mRNA polyadenylation|GO:0006397:mRNA processing|GO:0003674:molecular_function|GO:0005634:nucleus|GO:0005515:protein binding
PM01G12440	37.35	46	46.92	32.01	19.45	22.76	3.09	3.3	GO:0000974:Prp19 complex|GO:0003723:RNA binding|GO:0006396:RNA processing|GO:0008380:RNA splicing|GO:0080188:RNA-directed DNA methylation|GO:0046540:U4/U6 x U5 tri-snRNP complex|GO:0071012:catalytic step 1 spliceosome|GO:0071013:catalytic step 2 spliceosome|GO:0009507:chloroplast|GO:0009941:chloroplast envelope|GO:0031969:chloroplast membrane|GO:0009570:chloroplast stroma|GO:0005737:cytoplasm|GO:…
PM01G12450	0.29	0.45	0.19	0.29	0.21	0.34	0.25	0.15
PM01G12460	0.24	0.1	0.04	0.29	0.52	0.34	0.3	0.04
PM01G12470	5.76	9.49	19.66	18.31	14.82	12.65	12.65	29.84	GO:0005524:ATP binding|GO:0004004:ATP-dependent RNA helicase activity|GO:0008026:ATP-dependent helicase activity|GO:0003723:RNA binding|GO:0010501:RNA secondary structure unwinding|GO:0005634:nucleus
PM01G12480	21.5	23.33	12.4	20.23	41.84	25.19	12.08	61.95	GO:0006915:apoptotic process|GO:0008150:biological_process|GO:0008009:chemokine activity|GO:0005829:cytosol|GO:0009792:embryo development ending in birth or egg hatching|GO:0090002:establishment of protein localization to plasma membrane|GO:0070062:extracellular exosome|GO:0005576:extracellular region|GO:0006955:immune response|GO:0005622:intracellular|GO:0016020:membrane|GO:0005739:mitochondrion…
PM01G12490	17.77	18.11	23.24	20.92	14.7	14.56	11.72	9.97	GO:0004176:ATP-dependent peptidase activity|GO:0009507:chloroplast|GO:0009941:chloroplast envelope|GO:0009570:chloroplast stroma|GO:0009534:chloroplast thylakoid|GO:0009840:chloroplastic endopeptidase Clp complex|GO:0005737:cytoplasm|GO:0005829:cytosol|GO:0009368:endopeptidase Clp complex|GO:0016787:hydrolase activity|GO:0042802:identical protein binding|GO:0016020:membrane|GO:0006515:misfolded o…
PM01G12500	53.15	47.9	89.66	98.71	74.82	76.37	66.84	61.46	GO:0005524:ATP binding|GO:0005737:cytoplasm|GO:0005783:endoplasmic reticulum|GO:0016021:integral component of membrane|GO:0016020:membrane|GO:0005634:nucleus|GO:0048471:perinuclear region of cytoplasm|GO:0016567:protein ubiquitination|GO:0061630:ubiquitin protein ligase activity|GO:0031625:ubiquitin protein ligase binding|GO:0006511:ubiquitin-dependent protein catabolic process|GO:0004842:ubiquit…
PM01G12510	2.52	5.87	7.18	7.62	4.46	8.42	1.55	3.94	GO:0031519:PcG protein complex|GO:0005677:chromatin silencing complex|GO:0009960:endosperm development|GO:0018024:histone-lysine N-methyltransferase activity|GO:0005634:nucleus|GO:0009506:plasmodesma|GO:0005515:protein binding|GO:0006349:regulation of gene expression by genetic imprinting|GO:0006355:regulation of transcription, DNA-templated|GO:0003727:single-stranded RNA binding|GO:0003700:trans…
PM01G12520	8.33	9.76	18.89	14.57	12.46	16.37	12.78	21.77	GO:0003677:DNA binding|GO:0009294:DNA mediated transformation|GO:0006306:DNA methylation|GO:0035098:ESC/E(Z) complex|GO:0070314:G1 to G0 transition|GO:0031519:PcG protein complex|GO:0003723:RNA binding|GO:0000979:RNA polymerase II core promoter sequence-specific DNA binding|GO:0014898:cardiac muscle hypertrophy in response to stress|GO:0030154:cell differentiation|GO:0070301:cellular response to …
PM01G12530	0.57	0.15	0.22	0.34	1.15	0.68	0.32	0.98	GO:0005794:Golgi apparatus|GO:0016413:O-acetyltransferase activity|GO:0071554:cell wall organization or biogenesis|GO:0016021:integral component of membrane
PM01G12540	1.76	0.6	0.01	0.1	2.19	0.35	3.55	0.07	GO:0008150:biological_process|GO:0005783:endoplasmic reticulum|GO:0005576:extracellular region|GO:0016021:integral component of membrane|GO:0003674:molecular_function|GO:0005634:nucleus|GO:0005886:plasma membrane|GO:0005774:vacuolar membrane
PM01G12550	3.97	0.27	0.01	0.04	0.02	0.07	101.14	0.05	GO:0071369:cellular response to ethylene stimulus|GO:0071281:cellular response to iron ion|GO:0071732:cellular response to nitric oxide|GO:0030418:nicotianamine biosynthetic process|GO:0030410:nicotianamine synthase activity|GO:0005634:nucleus|GO:0010233:phloem transport|GO:0009555:pollen development|GO:0009860:pollen tube growth|GO:0010043:response to zinc ion
PM01G12560	12.01	26.95	42.68	47.36	36.85	46.35	33	19.66	GO:0004177:aminopeptidase activity|GO:0008150:biological_process|GO:0005575:cellular_component|GO:0009507:chloroplast|GO:0005737:cytoplasm|GO:0005829:cytosol|GO:0008239:dipeptidyl-peptidase activity|GO:0004175:endopeptidase activity|GO:0016787:hydrolase activity|GO:0016021:integral component of membrane|GO:0016020:membrane|GO:0003674:molecular_function|GO:0005634:nucleus|GO:0008233:peptidase acti…
PM01G12570	24.22	21.73	49.35	37.77	22.88	24.39	23.69	29.08	GO:0008150:biological_process|GO:0009507:chloroplast|GO:0005783:endoplasmic reticulum|GO:0003674:molecular_function
PM01G12580	7.1	1.55	2.85	15.29	5.33	2.65	39.13	15.16	GO:0008150:biological_process|GO:0005575:cellular_component|GO:0005829:cytosol|GO:0003674:molecular_function|GO:0005634:nucleus|GO:0050334:thiaminase activity|GO:0009228:thiamine biosynthetic process|GO:0009229:thiamine diphosphate biosynthetic process
PM01G12590	150.72	71.23	121.8	233.96	204.07	62.52	28.28	5.73	GO:0071454:cellular response to anoxia|GO:0070417:cellular response to cold|GO:0034605:cellular response to heat|GO:0009507:chloroplast|GO:0009941:chloroplast envelope|GO:0009570:chloroplast stroma|GO:0005507:copper ion binding|GO:0003674:molecular_function|GO:0080153:negative regulation of reductive pentose-phosphate cycle|GO:0016151:nickel cation binding|GO:0018316:peptide cross-linking via L-c…
PM01G12600	0.82	0.28	5.43	2.91	0.55	0.66	57.48	0.11	GO:0003677:DNA binding|GO:0009267:cellular response to starvation|GO:0006971:hypotonic response|GO:0017148:negative regulation of translation|GO:0005634:nucleus|GO:0045735:nutrient reservoir activity|GO:2000693:positive regulation of seed maturation|GO:0045893:positive regulation of transcription, DNA-templated|GO:0005515:protein binding|GO:0046982:protein heterodimerization activity|GO:0006355:r…
PM01G12610	2.86	4.3	7.82	4.91	8.11	5.12	10.12	9.59	GO:0005524:ATP binding|GO:0004176:ATP-dependent peptidase activity|GO:0034599:cellular response to oxidative stress|GO:0051131:chaperone-mediated protein complex assembly|GO:0009507:chloroplast|GO:0009535:chloroplast thylakoid membrane|GO:0006515:misfolded or incompletely synthesized protein catabolic process|GO:0070361:mitochondrial light strand promoter anti-sense binding|GO:0005759:mitochondri…
PM01G12620	3.36	11.55	15.3	14.84	13.28	13.83	8.78	17.93	GO:0080008:Cul4-RING E3 ubiquitin ligase complex|GO:0007010:cytoskeleton organization|GO:0000166:nucleotide binding|GO:0005634:nucleus|GO:0008360:regulation of cell shape|GO:0006357:regulation of transcription from RNA polymerase II promoter
PM01G12630	0.33	0.3	0	0.01	0.06	0	2.6	0.24	GO:0005794:Golgi apparatus|GO:0000139:Golgi membrane|GO:0035252:UDP-xylosyltransferase activity|GO:0000009:alpha-1,6-mannosyltransferase activity|GO:0000136:alpha-1,6-mannosyltransferase complex|GO:0005768:endosome|GO:0010392:galactoglucomannan metabolic process|GO:0051070:galactomannan biosynthetic process|GO:0008378:galactosyltransferase activity|GO:0016021:integral component of membrane|GO:001…
PM01G12640	0	0	0	0	0	0	0.32	0	GO:0005794:Golgi apparatus|GO:0000139:Golgi membrane|GO:0035252:UDP-xylosyltransferase activity|GO:0031278:alpha-1,2-galactosyltransferase activity|GO:0000009:alpha-1,6-mannosyltransferase activity|GO:0000136:alpha-1,6-mannosyltransferase complex|GO:0005768:endosome|GO:0009272:fungal-type cell wall biogenesis|GO:0010392:galactoglucomannan metabolic process|GO:0051070:galactomannan biosynthetic pr…
PM01G12650	0.02	0.05	0.03	0	0	0.01	0.18	0.25	GO:0005794:Golgi apparatus|GO:0000139:Golgi membrane|GO:0035252:UDP-xylosyltransferase activity|GO:0031278:alpha-1,2-galactosyltransferase activity|GO:0005768:endosome|GO:0009272:fungal-type cell wall biogenesis|GO:0010392:galactoglucomannan metabolic process|GO:0051070:galactomannan biosynthetic process|GO:0008378:galactosyltransferase activity|GO:0016021:integral component of membrane|GO:001019…
[truncated: 54,665 more rows]

## Sheet: Transcriptome data for VQ gene 
Gene_ID	Gene_Name	seedling	shoot	leaf_blade	leaf_sheath	stem	inflorescences	root	seed
PM01G05770	PmVQ8	2.93	1.63	2.15	2.08	3.19	1.8	2.83	1.08
[truncated: 69 more rows]
